# Supplementary material for: Switching of RNA splicing regulators in immature neuroblasts during adult neurogenesis
Source: eLife. 2024 Nov 22;12:RP87083. doi: 10.7554/eLife.87083 (PMC11584179; doi:10.7554/eLife.87083)
Supplement: Figure 2—figure supplement 2—source data 1. [file elife-87083-fig2-figsupp2-data1.xlsx]

## Sheet: All vs qNSC
s-qNSC
differentially spliced genes (DSG)
#%array_type=MTA-1_0
#%annotation=MTA-1_0.r3.na36.mm10.a1.transcript.csv
#%comparison=All vs qNSC
ID	Fold Change	Expressed in Both Conditions	Gene Symbol	Description	Group	Exon Splicing Index	Exon P-val	Exon FDR P-val	Exon Event Name	Exon Event Score
TC1400002333.mm.1	-1.39	T	Pdlim2	PDZ and LIM domain 2	Multiple_Complex	-1509.12	4.42e-12	1.05e-08	Cassette Exon	0.27
TC0300002296.mm.1	-2.12	T	Hapln2	hyaluronan and proteoglycan link protein 2	Multiple_Complex	-1406.04	3.38e-10	2.17e-07	Alternative 5' Donor Site	0.27
TC1100001916.mm.1	-2.43	T	Itgb4	integrin beta 4	Multiple_Complex	-1191.49	1.63e-08	4.09e-06
TC0400002737.mm.1	-2.35	T	Lpar1	lysophosphatidic acid receptor 1	Coding	-1010.6	1.29e-11	2.22e-08	Cassette Exon	0.36
TC1500001956.mm.1	-1.16	T	Cyp2d41-ps	cytochrome P450, family 2, subfamily d, member 41, pseudogene	Multiple_Complex	-921.6	3.49e-11	4.36e-08
TC0400003767.mm.1	-2.13	T	Nipal3	NIPA-like domain containing 3	Multiple_Complex	-815.2	0.0455	0.2552
TC0600003169.mm.1	727.85	T	Ccnd2	cyclin D2	Multiple_Complex	-787.47	2.07e-12	6.45e-09	Alternative 3' Acceptor Site	0.23
TC0700001275.mm.1	-2.05	T	Picalm	phosphatidylinositol binding clathrin assembly protein	Multiple_Complex	-746.86	1.16e-06	0.0001
TC1000003153.mm.1	-25.77	T	Erbb3	v-erb-b2 erythroblastic leukemia viral oncogene homolog 3 (avian)	Coding	-681.7	4.7e-08	9.17e-06
TC1500001955.mm.1	-1.02	T	Cyp2d40	cytochrome P450, family 2, subfamily d, polypeptide 40	Coding	-668.24	5.67e-12	1.27e-08
TC0600001508.mm.1	33.64	T	Foxm1; 4933413G19Rik	forkhead box M1; RIKEN cDNA 4933413G19 gene	Multiple_Complex	-625.57	9.41e-06	0.0006
TC1500001953.mm.1	-1.08	T	Cyp2d13	cytochrome P450, family 2, subfamily d, polypeptide 13	Multiple_Complex	-620.6	4.27e-11	5e-08
TC1500000757.mm.1	-1.15	T	Cyp2d9	cytochrome P450, family 2, subfamily d, polypeptide 9	Multiple_Complex	-597.96	2.79e-08	6.12e-06
TC1100004192.mm.1	-4.74	T	Aatk	apoptosis-associated tyrosine kinase	Multiple_Complex	-588.87	3.55e-10	2.25e-07
TC1500001946.mm.1	-1.23	T	Cyp2d10	cytochrome P450, family 2, subfamily d, polypeptide 10	Multiple_Complex	-548.47	1.36e-08	3.55e-06
TC0400003368.mm.1	-1.08	T	Gm1661	predicted gene 1661	Multiple_Complex	-528.24	5.04e-07	5.74e-05
TC1100003693.mm.1	658.13	T	Top2a	topoisomerase (DNA) II alpha	Multiple_Complex	-514.57	5.17e-08	9.84e-06
TC1500001957.mm.1	-1.16	T	Cyp2d26	cytochrome P450, family 2, subfamily d, polypeptide 26	Coding	-500.15	1.15e-08	3.14e-06
TC1000000819.mm.1	-1.02	T	Misp	mitotic spindle positioning	Coding	-498.81	4.02e-12	9.87e-09
TC0900000262.mm.1	-1.98	T	Opcml	opioid binding protein/cell adhesion molecule-like	Multiple_Complex	-474.42	2.02e-10	1.5e-07	Cassette Exon	0.27
TC1500001952.mm.1	-1.27	T	Cyp2d34	cytochrome P450, family 2, subfamily d, polypeptide 34	Coding	-466.6	4.68e-08	9.14e-06
TC0200003654.mm.1	-3.46	T	Grb14	growth factor receptor bound protein 14	Multiple_Complex	-463.59	3.99e-09	1.4e-06	Cassette Exon	0.21
TC1800001017.mm.1	-3.39	T	Aqp4	aquaporin 4	Multiple_Complex	-462.69	1.44e-11	2.4e-08	Cassette Exon	0.27
TC1500000760.mm.1	-1.12	T	Cyp2d12	cytochrome P450, family 2, subfamily d, polypeptide 12	Multiple_Complex	-460.83	1.2e-08	3.23e-06
TC0700002044.mm.1	2.91	T	Phrf1	PHD and ring finger domains 1	Multiple_Complex	-458.7	2.46e-10	1.72e-07
TC1700001105.mm.1	-2.07	T	Epb41l3	erythrocyte membrane protein band 4.1 like 3	Multiple_Complex	-454.98	7.02e-12	1.45e-08
TC0700002760.mm.1	-6.22	T	Kirrel2	kin of IRRE like 2 (Drosophila)	Multiple_Complex	-438.41	5.57e-10	3.16e-07	Cassette Exon	0.3
TC1300001474.mm.1	1	T	Hecw1	HECT, C2 and WW domain containing E3 ubiquitin protein ligase 1; Synthetic construct Mus musculus clone IMAGE:100063269, MGC:191045 HECT, C2 and WW domain containing E3 ubiquitin protein ligase 1 (Hecw1) mRNA, encodes complete protein.	Multiple_Complex	-430.17	6.31e-10	3.49e-07
TC0700003517.mm.1	-11.11	T	Slco3a1	solute carrier organic anion transporter family, member 3a1	Multiple_Complex	-419.2	4.3e-08	8.55e-06	Cassette Exon	0.22
TC1300001722.mm.1	541.87	T	Sox4	SRY (sex determining region Y)-box 4; SRY-box containing gene 4	Multiple_Complex	-400.37	1.6e-11	2.56e-08	Alternative 3' Acceptor Site	0.23
TC1200001308.mm.1	1.48	T	Ptprn2	protein tyrosine phosphatase, receptor type, N polypeptide 2	Multiple_Complex	-387.53	5.56e-13	2.89e-09
TC0300001856.mm.1	289.52	T	Ccna2	cyclin A2	Multiple_Complex	-362.67	4.4e-05	0.0018
TC1000002653.mm.1	-3.12	T	Ano4	anoctamin 4; Synthetic construct Mus musculus clone IMAGE:100068097, MGC:195714 anoctamin 4 (Ano4) mRNA, encodes complete protein.	Multiple_Complex	-338.84	7.79e-07	8.06e-05
TC0400001539.mm.1	-1.3	T	Col16a1	collagen, type XVI, alpha 1	Multiple_Complex	-336	8.92e-10	4.52e-07	Cassette Exon	0.27
TC0100003565.mm.1	-1.14	T	Atp1a4	ATPase, Na+/K+ transporting, alpha 4 polypeptide	Coding	-333.76	3.73e-07	4.53e-05
TC0500002297.mm.1	-2	T	Hs3st1	heparan sulfate (glucosamine) 3-O-sulfotransferase 1	Coding	-333.44	4.79e-09	1.6e-06
TC1400000940.mm.1	271.35	T	Pbk	PDZ binding kinase	Multiple_Complex	-333.04	2.01e-08	4.77e-06
TC1300002086.mm.1	-2.43	T	Spock1	sparc/osteonectin, cwcv and kazal-like domains proteoglycan 1	Coding	-310.75	1.54e-08	3.91e-06	Alternative 5' Donor Site	0.24
TC0900002604.mm.1	-3.29	T	Aqp9	aquaporin 9; aquaporin 9 (Aqp9), mRNA.	Multiple_Complex	-310	2.84e-05	0.0013
TC0500001927.mm.1	-1.29	T	Adam22; Gm19440	a disintegrin and metallopeptidase domain 22; Synthetic construct Mus musculus clone IMAGE:100064120, MGC:193491 a disintegrin and metallopeptidase domain 22 (Adam22) mRNA, encodes complete protein.; a disintegrin and metallopeptidase domain 22 (Adam22), transcript variant 1, mRNA.; PREDICTED: predicted gene, 19440 (Gm19440), miscRNA.	Multiple_Complex	-288.36	3.06e-06	0.0002
TC1100002597.mm.1	-4.54	T	Nipal4	NIPA-like domain containing 4	Multiple_Complex	-270.54	1.81e-08	4.42e-06
TC1200001314.mm.1	-3.68	T	Rapgef5	Rap guanine nucleotide exchange factor (GEF) 5	Multiple_Complex	-269.62	6.94e-05	0.0026
TC0500003411.mm.1	-1.1	T	Ssc4d	scavenger receptor cysteine rich family, 4 domains	Coding	-267.6	1.99e-09	8.21e-07
TC0600001398.mm.1	1.01	T	Clec4a3	C-type lectin domain family 4, member a3	Coding	-262.22	3.05e-08	6.54e-06
TC1600001827.mm.1	43.31	T	Epha3	Eph receptor A3	Multiple_Complex	-261.85	1.26e-06	0.0001
TC0700000777.mm.1	-23.41	T	Klk6	kallikrein related-peptidase 6	Coding	-251.24	2.6e-07	3.43e-05
TC0900001436.mm.1	-3.17	T			NonCoding	-246.9	3.54e-11	4.39e-08
TC1100001628.mm.1	-6.07	T	Cnp	2,3-cyclic nucleotide 3 phosphodiesterase; 2',3'-cyclic nucleotide 3' phosphodiesterase	Multiple_Complex	-239.45	5.92e-13	2.98e-09
TC0700004624.mm.1	205.98	T	Plk1	polo-like kinase 1	Coding	-236.88	1.16e-06	0.0001	Cassette Exon	0.23
TC0200004204.mm.1	-9.57	T	Prr5l	proline rich 5 like	Multiple_Complex	-231.23	3.71e-09	1.32e-06
TC0700001280.mm.1	-33.39	T	Sytl2	synaptotagmin-like 2; synaptotagmin-like 2 (Sytl2), transcript variant 3, mRNA.; synaptotagmin-like 2 (Sytl2), transcript variant 2, mRNA.; synaptotagmin-like 2 (Sytl2), transcript variant 1, mRNA.; synaptotagmin-like 2 (Sytl2), transcript variant 4, mRNA.; synaptotagmin-like 2 (Sytl2), transcript variant 5, mRNA.	Multiple_Complex	-230.41	0.0001	0.0037
TC0500000008.mm.1	241.07	T	Cdk6	cyclin-dependent kinase 6	Multiple_Complex	-229.88	0.0007	0.0141	Cassette Exon	0.23
TC0600001269.mm.1	-2.18	T	Hrh1	histamine receptor H1; Synthetic construct Mus musculus clone IMAGE:100015038, MGC:180343 histamine receptor H1 (Hrh1) mRNA, encodes complete protein.	Coding	-229.43	5.3e-10	3.03e-07	Alternative 5' Donor Site	0.25
TC0500001634.mm.1	-2.01	T	Tsc22d4	TSC22 domain family, member 4	Multiple_Complex	-228.91	7.66e-08	1.35e-05
TC1900001509.mm.1	375.55	T	Slit1	slit homolog 1 (Drosophila)	Multiple_Complex	-228.79	6.93e-11	7.03e-08	Alternative 3' Acceptor Site	0.23
TC0700004451.mm.1	5366.85	T	Mki67	antigen identified by monoclonal antibody Ki 67	Multiple_Complex	-224.93	1.32e-06	0.0001	Cassette Exon	0.21
TC0600002690.mm.1	266.65	T	Mcm2	minichromosome maintenance deficient 2 mitotin (S. cerevisiae)	Coding	-220.9	6.08e-05	0.0023
TC0400001641.mm.1	-2.8	T	Paqr7	progestin and adipoQ receptor family member VII	Multiple_Complex	-220.24	5.82e-12	1.29e-08	Alternative 5' Donor Site	0.27
TC1600001528.mm.1	-1.81	T	Kalrn	kalirin, RhoGEF kinase	Multiple_Complex	-219.15	1.33e-07	2.06e-05
TC1800000714.mm.1	-8.08	T	Ldlrad4	low density lipoprotein receptor class A domain containing 4	Coding	-212.39	3.64e-09	1.3e-06
TC0800000846.mm.1	241.24	T	Mcm5	minichromosome maintenance deficient 5, cell division cycle 46 (S. cerevisiae)	Coding	-211.32	9.79e-06	0.0006
TC1700002618.mm.1	1.25	T			NonCoding	-210.07	3.06e-09	1.14e-06
TC0800002447.mm.1	-1.21	T	Cyp4f18	cytochrome P450, family 4, subfamily f, polypeptide 18	Multiple_Complex	-206.67	4.09e-09	1.42e-06
TC0200002406.mm.1	7.63	T	Gm14277	predicted gene 14277	Multiple_Complex	-201.05	7.2e-09	2.19e-06
TC1300001763.mm.1	-1.33	T	Serpinb1-ps1	serine (or cysteine) peptidase inhibitor, clade B, member 1, pseudogene	Multiple_Complex	-199.78	2.38e-08	5.42e-06
TC0900003272.mm.1	-7.24	T	Hhatl	hedgehog acyltransferase-like	Multiple_Complex	-188.58	1.13e-06	0.0001
TC1400002141.mm.1	-23.37	T	Gjb6	gap junction protein, beta 6; gap junction protein, beta 6 (Gjb6), transcript variant 1, mRNA.	Multiple_Complex	-187.25	3.74e-11	4.58e-08
TC1100000547.mm.1	-2.22	T	Adamts2	a disintegrin-like and metallopeptidase (reprolysin type) with thrombospondin type 1 motif, 2 (Adamts2), transcript variant 2, mRNA.; a disintegrin-like and metallopeptidase (reprolysin type) with thrombospondin type 1 motif, 2; a disintegrin-like and metallopeptidase (reprolysin type) with thrombospondin type 1 motif, 2 (Adamts2), mRNA.	Multiple_Complex	-185.37	1.69e-10	1.33e-07
TC1800001237.mm.1	-3.92	T	Fgf1	fibroblast growth factor 1	Multiple_Complex	-180.57	7.33e-13	3.34e-09	Cassette Exon	0.27
TC0400003395.mm.1	-3.27	T	Tmem125	transmembrane protein 125	Multiple_Complex	-175.87	4.91e-10	2.87e-07	Alternative 5' Donor Site	0.24
TC0200002301.mm.1	185.46	T	Tpx2	TPX2, microtubule-associated protein homolog (Xenopus laevis)	Multiple_Complex	-172.12	2.56e-08	5.73e-06
TC0400003900.mm.1	-3.45	T	Kazn	kazrin, periplakin interacting protein	Multiple_Complex	-169.82	2.23e-09	8.98e-07
TC0200000467.mm.1	-1.03	T	Dbh	dopamine beta hydroxylase	Multiple_Complex	-169.19	1.61e-08	4.04e-06
TC0500000400.mm.1	-7.18	T	Ablim2	actin-binding LIM protein 2; Synthetic construct Mus musculus clone IMAGE:100062123, MGC:190370 actin-binding LIM protein 2 (Ablim2) mRNA, encodes complete protein.; actin-binding LIM protein 2 (Ablim2), transcript variant 5, mRNA.; actin-binding LIM protein 2 (Ablim2), transcript variant 4, mRNA.; actin-binding LIM protein 2 (Ablim2), transcript variant 6, mRNA.	Multiple_Complex	-167.98	1.38e-10	1.14e-07	Cassette Exon	0.2
TC1100002233.mm.1	-2.62	T	Cobl	cordon-bleu WH2 repeat	Multiple_Complex	-167.5	7.92e-08	1.38e-05	Cassette Exon	0.27
TC0600001949.mm.1	-1.69	T	Tmem229a	transmembrane protein 229A	Multiple_Complex	-166.7	3.41e-05	0.0015	Alternative 5' Donor Site	0.22
TC1600001339.mm.1	-7.98	T	Map6d1	MAP6 domain containing 1	Coding	-163.04	1.25e-10	1.06e-07
TC0400001215.mm.1	92.99	T	Stil	Scl/Tal1 interrupting locus	Multiple_Complex	-160.89	1.31e-05	0.0007
TC0400003832.mm.1	-1.52	T	Pla2g5	phospholipase A2, group V	Multiple_Complex	-159.95	2.67e-07	3.5e-05
TC0X00000973.mm.1	-1.89	T	Gjb1	gap junction protein, beta 1	Coding	-158.13	1.14e-14	2.53e-10	Cassette Exon	0.27
TC0700001287.mm.1	-5.08	T	Dlg2	discs, large homolog 2 (Drosophila); Synthetic construct Mus musculus clone IMAGE:100015000, MGC:180335 discs, large homolog 2 (Drosophila) (Dlg2) mRNA, encodes complete protein.	Multiple_Complex	-157.52	4.71e-05	0.0019
TC0200003316.mm.1	-1.72	T	Lrsam1	leucine rich repeat and sterile alpha motif containing 1	Multiple_Complex	-155.18	5.4e-10	3.08e-07
TC1100000892.mm.1	75.45	T	Aurkb	aurora kinase B	Multiple_Complex	-152.37	5.32e-07	6e-05
TC0200001776.mm.1	178.35	T	Nusap1	nucleolar and spindle associated protein 1	Multiple_Complex	-150.06	1.27e-07	1.99e-05
TC1000000661.mm.1	-15.74	T	Ank3	ankyrin 3, epithelial	Multiple_Complex	-147.41	0.0002	0.0058
TC1600000797.mm.1	1.13	T	Vgll3	vestigial like 3 (Drosophila)	Multiple_Complex	-147.17	6.61e-07	7.1e-05
TC1700002815.mm.1	-5.08	T	C4a	complement component 4A (Rodgers blood group); Synthetic construct Mus musculus clone IMAGE:100069505, MGC:199407 complement component 4A (Rodgers blood group) (C4a) mRNA, encodes complete protein.	Multiple_Complex	-146.72	1.35e-06	0.0001
TC0700000161.mm.1	39.2	T	Lig1	ligase I, DNA, ATP-dependent	Multiple_Complex	-145.73	1.45e-08	3.73e-06
TC0600000648.mm.1	-1.85	T	Chn2	chimerin 2; chimerin (chimaerin) 2	Multiple_Complex	-145.41	7.38e-08	1.31e-05	Cassette Exon	0.36
TC1100003562.mm.1	-1.03	T	Cacna1g	calcium channel, voltage-dependent, T type, alpha 1G subunit	Multiple_Complex	-145.13	6.92e-11	7.03e-08
TC1200001562.mm.1	221.47	T	Sox11	SRY (sex determining region Y)-box 11; SRY-box containing gene 11	Multiple_Complex	-144.3	3.28e-14	3.79e-10
TC1800000869.mm.1	-53.9	T	Mbp	myelin basic protein	Multiple_Complex	-143	9.84e-06	0.0006
TC0200003728.mm.1	157.83	T	Dlx2	distal-less homeobox 2	Multiple_Complex	-142.15	2.58e-10	1.79e-07	Alternative 3' Acceptor Site	0.23
TC0100003010.mm.1	-2.48	T	Tmem163	transmembrane protein 163	Multiple_Complex	-140.22	6.5e-07	7.02e-05
TC0900002173.mm.1	-6.46	T	Phldb1	pleckstrin homology-like domain, family B, member 1	Multiple_Complex	-139.36	1.05e-06	0.0001
TC0800000629.mm.1	441.22	T	Hmgb2	high mobility group box 2	Coding	-138.75	1.1e-09	5.31e-07	Alternative 3' Acceptor Site	0.23
TC1400000764.mm.1	-2.84	T	Mhrt	myosin heavy chain associated RNA transcript	Multiple_Complex	-136.21	8.44e-12	1.66e-08	Cassette Exon	0.24
TC0400003094.mm.1	-1.16	T	Cyp2j11	cytochrome P450, family 2, subfamily j, polypeptide 11	Coding	-134.61	2.49e-07	3.33e-05
TC0700001151.mm.1	75.22	T	Prc1	protein regulator of cytokinesis 1; protein regulator of cytokinesis 1 (Prc1), mRNA.	Multiple_Complex	-131.85	6.85e-06	0.0004
TC0700003075.mm.1	50.06	T	E2f8	E2F transcription factor 8	Multiple_Complex	-131.42	2.41e-07	3.26e-05
TC0900001527.mm.1	1.28	T	Gm27002; RP23-197K11.5	predicted gene, 27002 [Source:MGI Symbol;Acc:MGI:5504117]; novel transcript, sense intronic to Osbpl10	NonCoding	-131.41	0.0082	0.0852
TC1900001444.mm.1	-1.98	T	1500017E21Rik	RIKEN cDNA 1500017E21 gene	NonCoding	-130.21	8.22e-08	1.42e-05
TC0700004625.mm.1	-5.35	T	Kctd13	potassium channel tetramerisation domain containing 13	Multiple_Complex	-126.48	1.27e-12	4.82e-09	Cassette Exon	0.34
TC0400001741.mm.1	-1.37	T	Capzb	capping protein (actin filament) muscle Z-line, beta; capping protein (actin filament) muscle Z-line, beta (Capzb), transcript variant 4, mRNA.	Multiple_Complex	-125.1	1.39e-09	6.33e-07
TC0200001056.mm.1	80	T	Cdca7	cell division cycle associated 7	Multiple_Complex	-124.75	7.7e-08	1.35e-05
TC0400004176.mm.1	-2.57	T	Palm2; Pakap	paralemmin 2; paralemmin A kinase anchor protein	Multiple_Complex	-124.35	1.08e-10	9.72e-08
TC0500001898.mm.1	1.03	T	Cdk14	cyclin-dependent kinase 14	Multiple_Complex	-123.1	2.32e-09	9.25e-07
TC0100001222.mm.1	-9.08	T	Chil1	chitinase-like 1	Multiple_Complex	-122.84	5.36e-07	6.04e-05
TC0100003814.mm.1	209.71	T	Dtl	denticleless homolog (Drosophila)	Multiple_Complex	-121.54	0.0001	0.0038
TC0X00002177.mm.1	-8.91	T	Igsf1	immunoglobulin superfamily, member 1	Multiple_Complex	-121.35	3.75e-06	0.0003	Cassette Exon	0.24
TC1000001090.mm.1	-1.24	T	Anks1b	ankyrin repeat and sterile alpha motif domain containing 1B	Multiple_Complex	-120.91	3.26e-06	0.0002
TC1300002002.mm.1	-4.89	T	Sema4d	sema domain, immunoglobulin domain (Ig), transmembrane domain (TM) and short cytoplasmic domain, (semaphorin) 4D	Multiple_Complex	-120.4	1.04e-09	5.09e-07
TC1100002549.mm.1	89.37	T	Hmmr	hyaluronan mediated motility receptor (RHAMM)	Multiple_Complex	-119.97	2.04e-06	0.0002
TC0800002822.mm.1	-3.3	T	Tppp3	tubulin polymerization-promoting protein family member 3	Coding	-119.65	4.7e-12	1.1e-08	Cassette Exon	0.27
TC0700001131.mm.1	100.03	T	Ticrr	TOPBP1-interacting checkpoint and replication regulator	Coding	-119.31	6.35e-07	6.9e-05
TC0400000580.mm.1	-6.63	T	Slc44a1	solute carrier family 44, member 1	Multiple_Complex	-117.98	3.24e-09	1.18e-06
TC0900003138.mm.1	-1.72	T	Arpp21	cyclic AMP-regulated phosphoprotein, 21	Multiple_Complex	-117.82	5.72e-05	0.0022
TC0500003051.mm.1	21.25	T	Coro1c	coronin, actin binding protein 1C	Multiple_Complex	-116.77	2.51e-07	3.35e-05
TC1500002147.mm.1	1.01	T	Slc38a4	solute carrier family 38, member 4	Coding	-115.23	4.64e-05	0.0019
TC1300002588.mm.1	-1.72	T	Erbb2ip	Erbb2 interacting protein; Erbb2 interacting protein (Erbb2ip), transcript variant 2, mRNA.	Multiple_Complex	-114.36	4.21e-06	0.0003
TC0200005486.mm.1	-6.83	T	Dbndd2	dysbindin (dystrobrevin binding protein 1) domain containing 2	Multiple_Complex	-113.1	7.97e-10	4.15e-07	Cassette Exon	0.25
TC1600001184.mm.1	-1.04	T	Grin2a	glutamate receptor, ionotropic, NMDA2A (epsilon 1); Synthetic construct Mus musculus clone IMAGE:100015901, MGC:183485 glutamate receptor, ionotropic, NMDA2A (epsilon 1) (Grin2a) mRNA, encodes complete protein.	Multiple_Complex	-113	2.7e-10	1.84e-07
TC0900002451.mm.1	111.35	T	Kif23	kinesin family member 23	Coding	-112.69	4.29e-08	8.54e-06
TC0300002350.mm.1	-1.17	T	Zbtb7b	zinc finger and BTB domain containing 7B	Multiple_Complex	-112.18	6.83e-07	7.28e-05
TC1500002118.mm.1	176.23	T	Nell2	NEL-like 2	Coding	-111.93	3.77e-06	0.0003
TC0500000422.mm.1	89.04	T	Crmp1	collapsin response mediator protein 1; collapsin response mediator protein 1 (Crmp1), transcript variant 1, mRNA.	Multiple_Complex	-111.67	2.4e-07	3.24e-05	Alternative 3' Acceptor Site	0.33
TC1700001130.mm.1	-1.07	T	Myom1	myomesin 1	Multiple_Complex	-110.72	1.58e-07	2.35e-05
TC0200003215.mm.1	5.43	T	Vav2	vav 2 oncogene	Multiple_Complex	-110.48	4.53e-05	0.0019
TC0400003730.mm.1	1.08	T	Catsper4	cation channel, sperm associated 4	Multiple_Complex	-108.59	1.08e-10	9.72e-08
TC0400000861.mm.1	-7.03	T	Adamtsl1	ADAMTS-like 1	Multiple_Complex	-108.16	9.26e-05	0.0032
TC1400000156.mm.1	1.02	T			NonCoding	-107.71	2.56e-11	3.57e-08
TC0900003323.mm.1	1.01	T	C1qtnf5; Mfrp	C1q and tumor necrosis factor related protein 5; membrane-type frizzled-related protein	Coding	-107.34	2.95e-14	3.59e-10	Alternative 5' Donor Site	0.25
TC1800001269.mm.1	96.75	T	Dpysl3	dihydropyrimidinase-like 3	Multiple_Complex	-105.97	1.56e-06	0.0001	Cassette Exon	0.35
TC1300000313.mm.1	18.8	T	Gm26735	predicted gene, 26735 [Source:MGI Symbol;Acc:MGI:5477229]	NonCoding	-105.95	0.002	0.0312
TC1100004159.mm.1	-3.7	T	Lgals3bp	lectin, galactoside-binding, soluble, 3 binding protein	Multiple_Complex	-103.28	0.0001	0.004
TC0800001522.mm.1	10.3	T	Tubb3	tubulin, beta 3 class III	Coding	-103	6.69e-11	6.85e-08
TC1600001390.mm.1	83.22	T	Rfc4	replication factor C (activator 1) 4	Multiple_Complex	-102.53	2.63e-05	0.0012
TC0500000417.mm.1	-6.99	T	Ppp2r2c	protein phosphatase 2, regulatory subunit B, gamma; protein phosphatase 2 (formerly 2A), regulatory subunit B (PR 52), gamma isoform	Multiple_Complex	-102.4	3.45e-08	7.2e-06
TC1700000612.mm.1	-1.15	T	Col11a2	collagen, type XI, alpha 2	Multiple_Complex	-102.19	2.55e-08	5.72e-06	Cassette Exon	0.36
TC0400004139.mm.1	-2.94	T	Prkcz	protein kinase C, zeta	Multiple_Complex	-101.3	4.78e-05	0.0019
TC1000000735.mm.1	-1.03	T	Slc5a4a	solute carrier family 5, member 4a	Coding	-101.27	6.27e-12	1.35e-08
TC1000001676.mm.1	-2.16	T	Rmnd1; Gm5512	required for meiotic nuclear division 1 homolog (S. cerevisiae); required for meiotic nuclear division 1 pseudogene	Multiple_Complex	-99.41	4.48e-08	8.83e-06	Alternative 5' Donor Site	0.39
TC1100004076.mm.1	106.7	T	Hn1	hematological and neurological expressed sequence 1	Multiple_Complex	-98.67	1.05e-05	0.0006
TC1100002843.mm.1	-2.32	T	Gjc2	gap junction protein, gamma 2	Coding	-98.27	1.44e-12	5.13e-09	Alternative 5' Donor Site	0.27
TC0200003017.mm.1	-4.79	T	Nebl	nebulette	Multiple_Complex	-98.23	0.0002	0.006
TC1200002260.mm.1	-3.06	T	Prima1	proline rich membrane anchor 1; Synthetic construct Mus musculus clone IMAGE:100064076, MGC:193447 proline rich membrane anchor 1 (Prima1) mRNA, encodes complete protein.	Multiple_Complex	-97.52	3.69e-11	4.52e-08	Cassette Exon	0.27
TC0100003233.mm.1	-7.24	T	Pla2g4a	phospholipase A2, group IVA (cytosolic, calcium-dependent)	Multiple_Complex	-97.42	7.28e-05	0.0027
TC0X00003399.mm.1	8.57	T	Sh3bgrl	SH3-binding domain glutamic acid-rich protein like	Multiple_Complex	-97.41	1.09e-09	5.25e-07
TC0400004112.mm.1	-1.98	T	Smim1	small integral membrane protein 1	Multiple_Complex	-96.28	1.14e-10	1.01e-07	Cassette Exon	0.27
TC1300002543.mm.1	124.26	T	Ccnb1	cyclin B1	Multiple_Complex	-95.84	0.0005	0.0107	Alternative 3' Acceptor Site	0.23
TC0500000997.mm.1	-1.48	T	Arhgap24	Rho GTPase activating protein 24	Multiple_Complex	-93.94	4.94e-15	1.74e-10	Cassette Exon	0.29
TC0100001877.mm.1	35.41	T	Plxna2	plexin A2	Multiple_Complex	-93.59	9.13e-09	2.62e-06
TC1700001003.mm.1	96.72	T	Uhrf1	ubiquitin-like, containing PHD and RING finger domains, 1	Multiple_Complex	-93.05	0.0004	0.0104
TC0300001028.mm.1	-5.9	T	A230001M10Rik	RIKEN cDNA A230001M10 gene; RIKEN cDNA A230001M10 gene (A230001M10Rik), non-coding RNA.	NonCoding	-92.7	1.51e-12	5.25e-09	Cassette Exon	0.38
TC0200004129.mm.1	4.02	T	Mdk	midkine; midkine (Mdk), transcript variant 1, mRNA.	Coding	-91.36	2.24e-10	1.61e-07
TC0700001651.mm.1	9.47	T	Tead1	TEA domain family member 1	Multiple_Complex	-91.34	1.02e-08	2.85e-06
TC1300001558.mm.1	446.22	T	Hist1h2ak	histone cluster 1, H2ak	Coding	-91.14	1.97e-07	2.78e-05	Alternative 3' Acceptor Site	0.23
TC0700000988.mm.1	-20.94	T	Pcsk6	proprotein convertase subtilisin/kexin type 6	Multiple_Complex	-91.11	1.82e-05	0.0009
TC0700002918.mm.1	228.56	T	Gm5593	predicted gene 5593	Multiple_Complex	-90.45	0.0001	0.0036
TC0600000772.mm.1	50.21	T	Mad2l1	MAD2 mitotic arrest deficient-like 1	Multiple_Complex	-86.85	4.71e-06	0.0003	Alternative 3' Acceptor Site	0.23
TC0400001217.mm.1	-1	T	Pdzk1ip1	PDZK1 interacting protein 1	Multiple_Complex	-86.42	2.83e-05	0.0013
TC0300001757.mm.1	97.71	T	Ect2	ect2 oncogene	Multiple_Complex	-86.26	7.75e-08	1.36e-05
TC0200002532.mm.1	67.94	T	Ube2c	ubiquitin-conjugating enzyme E2C	Coding	-85.68	2.59e-09	1.01e-06
TC0400003092.mm.1	-1.32	T	Cyp2j7	cytochrome P450, family 2, subfamily j, polypeptide 7	Multiple_Complex	-85.59	2.09e-05	0.001
TC1500002214.mm.1	-179.28	T	Faim2	Fas apoptotic inhibitory molecule 2; Fas apoptotic inhibitory molecule 2 (Faim2), transcript variant 2, mRNA.	Coding	-85.42	2.78e-05	0.0013	Cassette Exon	0.31
TC0200005249.mm.1	-8.34	T	Bcas1	breast carcinoma amplified sequence 1	Multiple_Complex	-85.17	1.1e-06	0.0001
TC0500001673.mm.1	-1.14	T	Gpr146; D830046C22Rik	G protein-coupled receptor 146; RIKEN cDNA D830046C22 gene	Multiple_Complex	-84.15	1.29e-08	3.42e-06	Alternative 5' Donor Site	0.23
TC0600001327.mm.1	-1.53	T	Rasgef1a; Mir7044	RasGEF domain family, member 1A; microRNA 7044	Multiple_Complex	-83.53	4.23e-05	0.0018
TC1100002690.mm.1	-1.05	T	BC049762	cDNA sequence BC049762	Coding	-83.4	1.08e-07	1.75e-05
TC0700000512.mm.1	-1.08	T	Rinl	Ras and Rab interactor-like	Coding	-83.2	5.97e-11	6.33e-08
TC1600001443.mm.1	-170.16	T	Atp13a4	ATPase type 13A4	Multiple_Complex	-82.1	7.77e-06	0.0005
TC0200004547.mm.1	98.8	T	Ncaph	non-SMC condensin I complex, subunit H	Multiple_Complex	-81.97	0.0001	0.004	Cassette Exon	0.25
TC0500001301.mm.1	-1.44	T	Nos1	nitric oxide synthase 1, neuronal; Synthetic construct Mus musculus clone IMAGE:100068135, MGC:195752 nitric oxide synthase 1, neuronal (Nos1) mRNA, encodes complete protein.	Multiple_Complex	-81.88	0.0015	0.0261
TC0100002583.mm.1	-12.13	T	Tmbim1	transmembrane BAX inhibitor motif containing 1	Multiple_Complex	-81.37	1.99e-08	4.73e-06	Cassette Exon	0.29
TC1800000834.mm.1	-6.18	T	Pstpip2	proline-serine-threonine phosphatase-interacting protein 2	Coding	-80.95	6.44e-08	1.17e-05
TC0600003030.mm.1	-2.31	T	Wnk1	WNK lysine deficient protein kinase 1	Multiple_Complex	-80.53	2.32e-05	0.0011
TC1100001135.mm.1	17.74	T	Sez6	seizure related gene 6	Multiple_Complex	-80.46	1.2e-06	0.0001
TC1100002091.mm.1	-3.16	T	Inpp5j	inositol polyphosphate 5-phosphatase J	Coding	-79.84	3.27e-11	4.16e-08
TC1600000045.mm.1	-6.23	T	Sec14l5	SEC14-like lipid binding 5; SEC14-like 5 (S. cerevisiae)	Coding	-79.54	9.13e-08	1.54e-05	Cassette Exon	0.21
TC1100003315.mm.1	-2.48	T	Ksr1	kinase suppressor of ras 1; Synthetic construct Mus musculus clone IMAGE:100068355, MGC:195899 kinase suppressor of ras 1 (Ksr1) mRNA, encodes complete protein.	Coding	-79.32	1.26e-08	3.35e-06
TC0500001338.mm.1	-11.87	T	Slc8b1	solute carrier family 8 (sodium/lithium/calcium exchanger), member B1	Multiple_Complex	-79.23	5.84e-06	0.0004	Cassette Exon	0.31
TC0600000289.mm.1	-3.08	T	2210408F21Rik	RIKEN cDNA 2210408F21 gene	NonCoding	-78.84	4.42e-12	1.05e-08
TC0200002835.mm.1	66.3	T	Myt1	myelin transcription factor 1	Multiple_Complex	-78.81	9.89e-08	1.64e-05
TC1500000747.mm.1	38.39	T	2003-09-01	septin 3	Multiple_Complex	-78.8	1.86e-10	1.41e-07
TC1500001227.mm.1	-1.41	T	Pdzd2	PDZ domain containing 2	Multiple_Complex	-78.26	0.0024	0.0357
TC0900002254.mm.1	-12.49	T	Ncam1	neural cell adhesion molecule 1	Multiple_Complex	-77.99	1.78e-06	0.0002
TC1800000989.mm.1	-3.08	T	Mir1901; Gm6277	microRNA 1901; predicted gene 6277	Multiple_Complex	-77.55	1.42e-08	3.67e-06
TC1000000493.mm.1	-5.81	T	Gja1	gap junction protein, alpha 1	Multiple_Complex	-77	3.36e-08	7.07e-06	Cassette Exon	0.38
TC0100003026.mm.1	165.5	T	Mcm6	minichromosome maintenance deficient 6 (MIS5 homolog, S. pombe) (S. cerevisiae)	Coding	-75.95	5.31e-05	0.0021	Cassette Exon	0.23
TC0600001478.mm.1	372.09	T	LOC100861633	PREDICTED: uncharacterized LOC100861633 (LOC100861633), miscRNA.	NonCoding	-75.69	2.24e-06	0.0002
TC0500003487.mm.1	-8.48	T	Adap1	ArfGAP with dual PH domains 1	Multiple_Complex	-75.52	3.5e-08	7.27e-06
TC1500000766.mm.1	-1.84	T	Serhl	serine hydrolase-like	Multiple_Complex	-75.3	2.64e-06	0.0002	Alternative 5' Donor Site	0.26
TC0500003477.mm.1	-1.9	T	BC037034	cDNA sequence BC037034	Multiple_Complex	-74.94	1.3e-05	0.0007
TC1700001166.mm.1	-3.43	T	Ltbp1	latent transforming growth factor beta binding protein 1	Multiple_Complex	-74.89	2.85e-09	1.08e-06	Cassette Exon	0.25
TC1700000565.mm.1	-2.02	T	Cyp4f37	cytochrome P450, family 4, subfamily f, polypeptide 37	Coding	-73.77	7.55e-08	1.33e-05
TC0X00000059.mm.1	1.07	T	Cacna1f	calcium channel, voltage-dependent, alpha 1F subunit; Synthetic construct Mus musculus clone IMAGE:100062089, MGC:190349 calcium channel, voltage-dependent, alpha 1F subunit (Cacna1f) mRNA, encodes complete protein.	Multiple_Complex	-73.13	2.58e-08	5.77e-06
TC0300000574.mm.1	102.49	T	Smc4	structural maintenance of chromosomes 4	Multiple_Complex	-73.04	0.0003	0.0072
TC0500001139.mm.1	66.05	T	Pole	polymerase (DNA directed), epsilon	Multiple_Complex	-72.92	0.0002	0.0047	Cassette Exon	0.23
TC1900001097.mm.1	-91.23	T	Myrf	myelin regulatory factor	Coding	-72.86	3.28e-07	4.11e-05	Cassette Exon	0.31
TC1700001598.mm.1	1.36	T	Tnfrsf12a	tumor necrosis factor receptor superfamily, member 12a	Coding	-72.73	3.13e-09	1.16e-06
TC1000000150.mm.1	-17.22	T	Map7	microtubule-associated protein 7	Coding	-72.6	3.07e-10	2.02e-07	Cassette Exon	0.31
TC1500002217.mm.1	50.81	T	Racgap1	Rac GTPase-activating protein 1	Multiple_Complex	-72.02	1.35e-05	0.0007
TC0700000290.mm.1	-1.72	T	Eml2; Mir330	echinoderm microtubule associated protein like 2; microRNA 330	Multiple_Complex	-72.02	6.18e-05	0.0024
TC0900001954.mm.1	-17.08	T	Ntm	neurotrimin	Multiple_Complex	-71.48	4.22e-09	1.46e-06
TC1900000645.mm.1	-3.67	T	Scd3	stearoyl-coenzyme A desaturase 3	Coding	-71.37	8.81e-09	2.55e-06
TC0100002338.mm.1	-6.11	T	Hecw2	HECT, C2 and WW domain containing E3 ubiquitin protein ligase 2	Multiple_Complex	-71.34	4.65e-05	0.0019
TC0800002390.mm.1	1.68	T	Upf1	UPF1 regulator of nonsense transcripts homolog (yeast)	Coding	-69.33	1.06e-09	5.13e-07
TC1100003993.mm.1	-93.95	T	Fam20a	family with sequence similarity 20, member A	Multiple_Complex	-69.3	0.0001	0.0037
TC1800000103.mm.1	-9.5	T	Lama3	laminin, alpha 3	Coding	-69.3	3.61e-09	1.29e-06	Cassette Exon	0.26
TC1300002102.mm.1	1.06	T	Slc28a3	solute carrier family 28 (sodium-coupled nucleoside transporter), member 3	Multiple_Complex	-69	1.94e-07	2.75e-05
TC0100002033.mm.1	143.82	T	Mcm3	minichromosome maintenance deficient 3 (S. cerevisiae)	Coding	-68.94	0.0001	0.0039
TC0700001702.mm.1	-1.35	T	9030624J02Rik	RIKEN cDNA 9030624J02 gene	Multiple_Complex	-68.92	2.88e-09	1.09e-06
TC1400001567.mm.1	-18.3	T	Kcnma1	potassium large conductance calcium-activated channel, subfamily M, alpha member 1	Multiple_Complex	-68.57	2.58e-05	0.0012
TC1200000682.mm.1	-8.11	T	Plekhg3	pleckstrin homology domain containing, family G (with RhoGef domain) member 3	Coding	-68.03	2.27e-05	0.0011
TC1700002006.mm.1	-1.09	T	H2-T3	histocompatibility 2, T region locus 3; histocompatibility 2, T region locus 3 (H2-T3), mRNA.	Multiple_Complex	-67.81	0.0388	0.2319
TC0200001748.mm.1	85.41	T	Knstrn	kinetochore-localized astrin/SPAG5 binding	Coding	-67.35	2.12e-05	0.001
TC0300000485.mm.1	-1.78	T	Mbnl1	muscleblind-like 1 (Drosophila)	Multiple_Complex	-67.19	3.06e-05	0.0014
TC1100003814.mm.1	-1.94	T	Etv4	ets variant 4; Synthetic construct Mus musculus clone IMAGE:100016259, MGC:184513 ets variant gene 4 (E1A enhancer binding protein, E1AF) (Etv4) mRNA, encodes complete protein.; ets variant gene 4 (E1A enhancer binding protein, E1AF)	Multiple_Complex	-67.17	3.49e-09	1.26e-06
TC1900000255.mm.1	1.11	T	Lpxn	leupaxin	Multiple_Complex	-65.69	2.77e-06	0.0002
TC1900001504.mm.1	-1.08	T	Tll2	tolloid-like 2	Coding	-65.61	1.07e-11	1.93e-08	Cassette Exon	0.27
TC0800000126.mm.1	13.16	T	Tfdp1	transcription factor Dp 1	Coding	-65.11	1.21e-06	0.0001
TC1200000203.mm.1	146.62	T	Rrm2	ribonucleotide reductase M2	Multiple_Complex	-64.95	3.42e-05	0.0015
TC0X00000958.mm.1	49.56	T	Kif4	kinesin family member 4	Multiple_Complex	-64.39	3.25e-05	0.0014	Cassette Exon	0.22
TC1200001367.mm.1	1.01	T	Mfsd2b	major facilitator superfamily domain containing 2B	Multiple_Complex	-64.17	5.83e-08	1.08e-05
TC0700000030.mm.1	-1.09	T	Pira6	paired-Ig-like receptor A6	Multiple_Complex	-63.79	2.32e-07	3.16e-05
TC1100004064.mm.1	-2.68	T	Fads6	fatty acid desaturase domain family, member 6	Multiple_Complex	-63.36	4.49e-05	0.0018
TC0200001221.mm.1	1.16	T	Ypel4	yippee-like 4 (Drosophila)	Multiple_Complex	-63.34	2.52e-07	3.36e-05
TC0400003207.mm.1	-2.07	T	Mroh7	maestro heat-like repeat family member 7	Multiple_Complex	-62.61	9.68e-10	4.8e-07
TC1500002100.mm.1	-3.8	T	Prickle1	prickle homolog 1 (Drosophila)	Coding	-62.56	6.85e-07	7.29e-05
TC1200000142.mm.1	63.56	T	Odc1	ornithine decarboxylase, structural 1	Coding	-62.35	3.08e-06	0.0002	Cassette Exon	0.21
TC0100001744.mm.1	-12.03	T	1700047M11Rik	RIKEN cDNA 1700047M11 gene; RIKEN cDNA 1700047M11 gene (1700047M11Rik), non-coding RNA.	NonCoding	-62.18	4.05e-08	8.18e-06
TC1200001262.mm.1	-13.63	T	Adssl1	adenylosuccinate synthetase like 1	Coding	-61.89	8.36e-09	2.45e-06
TC0600002756.mm.1	-2.63	T	Adamts9	a disintegrin-like and metallopeptidase (reprolysin type) with thrombospondin type 1 motif, 9	Multiple_Complex	-61.86	3.14e-07	3.97e-05
TC0X00002046.mm.1	-1.35	T	Gm14569	predicted gene 14569	Multiple_Complex	-61.86	2.03e-06	0.0002
TC0300001805.mm.1	-169.58	T	Pex5l	peroxisomal biogenesis factor 5-like; peroxisomal biogenesis factor 5-like (Pex5l), transcript variant 1, mRNA.; peroxisomal biogenesis factor 5-like (Pex5l), transcript variant 2, mRNA.	Multiple_Complex	-61.39	7.38e-05	0.0027
TC0400004224.mm.1	18.84	T	Ephb2	Eph receptor B2; Synthetic construct Mus musculus clone IMAGE:100062018, MGC:190326 Eph receptor B2 (Ephb2) mRNA, encodes complete protein.	Multiple_Complex	-61.37	1.06e-06	0.0001
TC0Y00000221.mm.1	2.77	T	Gm21857; LOC100861837; Mid1	predicted gene, 21857 [Source:MGI Symbol;Acc:MGI:5434021]; PREDICTED: midline-1-like (LOC100861837), mRNA.; midline 1	Coding	-61.17	4.86e-05	0.002
TC1700000564.mm.1	-2.38	T	Cyp4f16	cytochrome P450, family 4, subfamily f, polypeptide 16	Multiple_Complex	-60.49	4.58e-08	8.98e-06
TC1700000047.mm.1	-10.8	T	Synj2	synaptojanin 2	Multiple_Complex	-60.42	1.97e-08	4.7e-06
TC1600001441.mm.1	-3.74	T	Atp13a5	ATPase type 13A5	Coding	-60.22	4.6e-05	0.0019
TC1100002107.mm.1	-4.53	T	Sec14l2	SEC14-like lipid binding 2; SEC14-like 2 (S. cerevisiae)	Multiple_Complex	-60.17	1.75e-06	0.0002
TC1900001711.mm.1	-2.83	T	Ablim1	actin-binding LIM protein 1; actin-binding LIM protein 1 (Ablim1), transcript variant 2, mRNA.; actin-binding LIM protein 1 (Ablim1), transcript variant 1, mRNA.	Multiple_Complex	-60.08	2.91e-07	3.74e-05
TC1300001889.mm.1	-1.54	T	A330076C08Rik	RIKEN cDNA A330076C08 gene; RIKEN cDNA A330076C08 gene (A330076C08Rik), transcript variant 2, non-coding RNA.	NonCoding	-59.93	4.27e-05	0.0018	Alternative 5' Donor Site	0.27
TC1000002008.mm.1	117.27	T	Marcks	myristoylated alanine rich protein kinase C substrate	Multiple_Complex	-59.9	2.02e-07	2.83e-05
TC0900000463.mm.1	-1.52	T	1700063D05Rik	RIKEN cDNA 1700063D05 gene; RIKEN cDNA 1700063D05 gene (1700063D05Rik), non-coding RNA.	NonCoding	-59.86	4.39e-10	2.65e-07	Cassette Exon	0.3
TC0100001189.mm.1	-1.09	T	Klhdc8a	kelch domain containing 8A	Coding	-59.56	1.83e-10	1.41e-07
TC1100002109.mm.1	-1.89	T	Ccdc157	coiled-coil domain containing 157; coiled-coil domain containing 157 (Ccdc157), transcript variant 1, mRNA.	Multiple_Complex	-59.04	4.38e-05	0.0018	Cassette Exon	0.31
TC0800000773.mm.1	1.23	T	Map1s	microtubule-associated protein 1S	Coding	-59.01	1.14e-07	1.83e-05
TC0200002803.mm.1	1.09	T	Slc17a9	solute carrier family 17, member 9	Multiple_Complex	-59.01	8.64e-06	0.0005
TC1000001366.mm.1	-6.67	T	Cpm	carboxypeptidase M	Multiple_Complex	-58.98	1.53e-08	3.89e-06
TC0900001652.mm.1	63.87	T	Kif15	kinesin family member 15	Multiple_Complex	-58.78	0.0009	0.0181
TC0200001115.mm.1	7.56	T	Hnrnpa3; Gm6793	heterogeneous nuclear ribonucleoprotein A3; heterogeneous nuclear ribonucleoprotein A3 pseudogene	Multiple_Complex	-58.74	4.03e-07	4.82e-05
TC0100001190.mm.1	1.2	T	Nuak2	NUAK family, SNF1-like kinase, 2	Multiple_Complex	-58.21	7.06e-08	1.26e-05
TC0800003005.mm.1	1.11	T			NonCoding	-58.14	1.01e-11	1.85e-08	Alternative 3' Acceptor Site	0.28
TC1300000148.mm.1	-8.85	T	Elmo1	engulfment and cell motility 1; engulfment and cell motility 1 (Elmo1), transcript variant 2, non-coding RNA.	Multiple_Complex	-57.9	0.002	0.0321
TC1000000904.mm.1	-2.4	T	Tle2	transducin-like enhancer of split 2, homolog of Drosophila E(spl); Synthetic construct Mus musculus clone IMAGE:100063585, MGC:191102 transducin-like enhancer of split 2, homolog of Drosophila E(spl) (Tle2) mRNA, encodes complete protein.	Multiple_Complex	-57.73	0.0413	0.2406
TC1400002081.mm.1	-1.66	T	Jph4	junctophilin 4	Multiple_Complex	-57.7	2.98e-07	3.81e-05	Cassette Exon	0.2
TC1100002225.mm.1	-1.9	T	Ddc	dopa decarboxylase	Multiple_Complex	-57.66	0.0001	0.0039
TC1100001917.mm.1	9.69	T	Gm19826	PREDICTED: predicted gene, 19826, transcript variant 1 (Gm19826), miscRNA.; PREDICTED: predicted gene, 19826, transcript variant 2 (Gm19826), miscRNA.	NonCoding	-57.58	0.0011	0.0213
TC0100003069.mm.1	-25.78	T	Cdk18	cyclin-dependent kinase 18	Coding	-57.5	3.95e-06	0.0003
TC0300001587.mm.1	29.82	T	Depdc1a	DEP domain containing 1a	Coding	-57.47	1.24e-05	0.0007
TC0800000592.mm.1	-3.62	T	Gpm6a	glycoprotein m6a	Multiple_Complex	-57.31	1.34e-08	3.51e-06
TC0100000428.mm.1	-1.02	T	Aox3	aldehyde oxidase 3	Multiple_Complex	-57.28	1.29e-08	3.42e-06
TC0400001125.mm.1	1.01	T	Hspb11	heat shock protein family B (small), member 11	Multiple_Complex	-57.17	0.019	0.1481
TC1500001136.mm.1	-4.98	T	Ghr	growth hormone receptor	Multiple_Complex	-57.11	0.0009	0.0182
TC1600000143.mm.1	-11.53	T	Shisa9	shisa family member 9; shisa homolog 9 (Xenopus laevis)	Multiple_Complex	-56.58	1.41e-11	2.36e-08
TC1300002475.mm.1	-1.25	T	1700029F12Rik	RIKEN cDNA 1700029F12 gene; RIKEN cDNA 1700029F12 gene (1700029F12Rik), transcript variant 1, mRNA.	Multiple_Complex	-56.29	7.62e-08	1.34e-05
TC0200001552.mm.1	-5.13	T	Cd59a	CD59a antigen	Multiple_Complex	-56.27	0.0012	0.0213
TC1500001690.mm.1	-1.95	T	Ptk2	PTK2 protein tyrosine kinase 2	Multiple_Complex	-56.04	1.31e-06	0.0001
TC1300000366.mm.1	-1.21	T	Serpinb1b	serine (or cysteine) peptidase inhibitor, clade B, member 1b	Coding	-56.03	3.42e-12	8.69e-09
TC1000001149.mm.1	-4.05	T	Tmcc3	transmembrane and coiled coil domains 3	Multiple_Complex	-56.02	2.19e-08	5.09e-06	Cassette Exon	0.28
TC1700001981.mm.1	80.8	T	Tubb5	tubulin, beta 5 class I	Multiple_Complex	-55.72	8.38e-08	1.44e-05
TC0900001424.mm.1	29.89	T	Celsr3	cadherin, EGF LAG seven-pass G-type receptor 3 (flamingo homolog, Drosophila)	Multiple_Complex	-55.69	3.33e-06	0.0002
TC1700001429.mm.1	-1.87	T	Qk	quaking	Multiple_Complex	-55.64	5.14e-09	1.69e-06
TC1100001407.mm.1	-1.5	T	Car10	carbonic anhydrase 10	Multiple_Complex	-55.37	2.65e-05	0.0012
TC0700001713.mm.1	-13.58	T			NonCoding	-55.13	1.42e-10	1.16e-07
TC0700001555.mm.1	-1.27	T	Timm10b; Dnhd1	translocase of inner mitochondrial membrane 10B; dynein heavy chain domain 1	Multiple_Complex	-55.02	8.33e-09	2.44e-06
TC0600003060.mm.1	1.32	T	Iqsec3	IQ motif and Sec7 domain 3; Synthetic construct Mus musculus clone IMAGE:100068357, MGC:195901 IQ motif and Sec7 domain 3 (Iqsec3) mRNA, encodes complete protein.; IQ motif and Sec7 domain 3 (Iqsec3), mRNA.	Multiple_Complex	-54.79	1.54e-07	2.31e-05
TC1400002293.mm.1	-19.51	T	Dock5	dedicator of cytokinesis 5	Multiple_Complex	-54.67	4.04e-09	1.41e-06	Cassette Exon	0.29
TC1400002017.mm.1	-13.99	T	Ndrg2	N-myc downstream regulated gene 2	Coding	-54.61	1.97e-07	2.78e-05	Cassette Exon	0.29
TC1100002694.mm.1	51.17	T	Hnrnpab	heterogeneous nuclear ribonucleoprotein A/B	Coding	-54.35	2.66e-08	5.89e-06
TC0200001741.mm.1	69.94	T	Bub1b	budding uninhibited by benzimidazoles 1 homolog, beta (S. cerevisiae)	Multiple_Complex	-54.31	0.0038	0.0502	Cassette Exon	0.21
TC1100001705.mm.1	-1.62	T	Acbd4	acyl-Coenzyme A binding domain containing 4	Multiple_Complex	-54.22	6.43e-07	6.96e-05
TC0400000567.mm.1	44.38	T	Smc2	structural maintenance of chromosomes 2	Multiple_Complex	-53.97	2.33e-07	3.17e-05
TC0400003390.mm.1	91.95	T	Cdc20	cell division cycle 20	Multiple_Complex	-53.8	5.81e-05	0.0022
TC1100001684.mm.1	8.93	T	BC030867	cDNA sequence BC030867	Multiple_Complex	-53.25	1.64e-07	2.41e-05
TC0X00003379.mm.1	-1.12	T	G530011O06Rik	RIKEN cDNA G530011O06 gene	NonCoding	-53.21	7.02e-05	0.0026
TC1600001409.mm.1	-2	T	Lppos	LIM domain containing preferred translocation partner in lipoma, opposite strand	NonCoding	-53.19	0.0009	0.0184
TC1100003326.mm.1	-59.73	T	Evi2a; Evi2b; Gm21975	ecotropic viral integration site 2a; ecotropic viral integration site 2b; predicted gene 21975	Multiple_Complex	-53.15	3.62e-07	4.44e-05	Mutually Exclusive Exons	0.25
TC1000000402.mm.1	100.96	T	Cd24a	CD24a antigen	Coding	-53.13	2.45e-08	5.53e-06
TC1000001546.mm.1	28.02	T	Cdk4	cyclin-dependent kinase 4	Multiple_Complex	-53.07	7.01e-06	0.0004	Alternative 3' Acceptor Site	0.27
TC1900000529.mm.1	378.82	T	Kif11	kinesin family member 11	Coding	-53.01	6.66e-10	3.64e-07
TC1700000602.mm.1	-1.79	T	Rgl2	ral guanine nucleotide dissociation stimulator-like 2	Multiple_Complex	-52.84	4.84e-05	0.002
TC0700001185.mm.1	-2.33	T	Sh3gl3	SH3-domain GRB2-like 3; SH3-domain GRB2-like 3 (Sh3gl3), mRNA.	Multiple_Complex	-52.74	1.91e-06	0.0002	Cassette Exon	0.27
TC1200001261.mm.1	-22.46	T	Inf2	inverted formin, FH2 and WH2 domain containing	Multiple_Complex	-52.54	2.1e-08	4.94e-06
TC0X00001682.mm.1	-2.24	T	Gpm6b	glycoprotein m6b	Multiple_Complex	-52.49	6.7e-08	1.21e-05
TC1700001938.mm.1	24.34	T	D17H6S56E-5	DNA segment, Chr 17, human D6S56E 5	Coding	-52.19	6.26e-07	6.82e-05
TC1600000376.mm.1	-8.47	T	Il1rap	interleukin 1 receptor accessory protein	Multiple_Complex	-51.93	1.43e-06	0.0001	Cassette Exon	0.27
TC0100001883.mm.1	-7.04	T	A330023F24Rik; Mir29c; Mir29b-2	RIKEN cDNA A330023F24 gene; microRNA 29c; microRNA 29b-2	Multiple_Complex	-51.65	2.42e-06	0.0002	Alternative 5' Donor Site	0.25
TC1600000218.mm.1	-6.94	T	Aifm3	apoptosis-inducing factor, mitochondrion-associated 3	Multiple_Complex	-51.48	1.11e-10	9.89e-08
TC1000002341.mm.1	52.09	T	Cdk1	cyclin-dependent kinase 1	Multiple_Complex	-51.39	2.07e-05	0.001
TC0100003827.mm.1	1.27	T	Hhat	hedgehog acyltransferase	Multiple_Complex	-51.37	2.97e-08	6.41e-06
TC0300000521.mm.1	-1.01	T	Kcnab1	potassium voltage-gated channel, shaker-related subfamily, beta member 1	Multiple_Complex	-51.25	8.98e-05	0.0031
TC0400002876.mm.1	-66.6	T	Ptprd	protein tyrosine phosphatase, receptor type, D	Multiple_Complex	-51.08	9.49e-06	0.0006
TC0100000023.mm.1	-2.71	T	St18	suppression of tumorigenicity 18	Multiple_Complex	-50.75	5.35e-05	0.0021
TC0400003516.mm.1	23.93	T	Cdca8	cell division cycle associated 8	Multiple_Complex	-50.73	0.0001	0.0039
TC1200000503.mm.1	1.01	T	Ctage5	CTAGE family, member 5	Multiple_Complex	-50.71	4.74e-05	0.0019	Cassette Exon	0.48
TC0800000366.mm.1	-3.19	T	Dusp26	dual specificity phosphatase 26 (putative)	Multiple_Complex	-50.44	1.12e-05	0.0006
TC0100003057.mm.1	-2.74	T	Ikbke	inhibitor of kappaB kinase epsilon	Multiple_Complex	-50.31	7.68e-06	0.0005	Cassette Exon	0.34
TC1500001945.mm.1	-1.18	T	Cyp2d11; Mir7684	cytochrome P450, family 2, subfamily d, polypeptide 11; microRNA 7684	Multiple_Complex	-50.28	8.46e-11	8.1e-08	Cassette Exon	0.29
TC0100001511.mm.1	-2.36	T	Gm20743	predicted gene, 20743	NonCoding	-50.06	1.17e-12	4.54e-09
TC0500001332.mm.1	1.63	T	Rbm19	RNA binding motif protein 19	Coding	-49.88	8.25e-11	7.95e-08
TC0500001931.mm.1	21.28	T	Dbf4	DBF4 homolog (S. cerevisiae)	Multiple_Complex	-49.83	1.27e-06	0.0001
TC0800002238.mm.1	-2.2	T	Wdr17	WD repeat domain 17	Multiple_Complex	-49.68	0.0002	0.0056
TC0600000606.mm.1	-5.35	T	Nfe2l3	nuclear factor, erythroid derived 2, like 3	Multiple_Complex	-49.25	1.22e-08	3.27e-06
TC0400000018.mm.1	-1.61	T	Chchd7	coiled-coil-helix-coiled-coil-helix domain containing 7; coiled-coil-helix-coiled-coil-helix domain containing 7 (Chchd7), transcript variant 1, mRNA.	Multiple_Complex	-49.11	5.74e-07	6.36e-05	Alternative 5' Donor Site	0.27
TC1400000119.mm.1	3.84	T	Slc4a7	solute carrier family 4, sodium bicarbonate cotransporter, member 7; Synthetic construct Mus musculus clone IMAGE:100015785, MGC:183437 solute carrier family 4, sodium bicarbonate cotransporter, member 7 (Slc4a7) mRNA, encodes complete protein.; solute carrier family 4, sodium bicarbonate cotransporter, member 7 (Slc4a7), mRNA.	Multiple_Complex	-49.08	1.23e-06	0.0001
TC1100003414.mm.1	1.08	T	Lhx1	LIM homeobox protein 1	Multiple_Complex	-49	2.59e-06	0.0002
TC0600002763.mm.1	2.13	T	Magi1	membrane associated guanylate kinase, WW and PDZ domain containing 1; membrane associated guanylate kinase, WW and PDZ domain containing 1 (Magi1), transcript variant 3, mRNA.; membrane associated guanylate kinase, WW and PDZ domain containing 1 (Magi1), transcript variant 4, mRNA.; membrane associated guanylate kinase, WW and PDZ domain containing 1 (Magi1), transcript variant 1, mRNA.	Multiple_Complex	-48.96	2.99e-05	0.0014
TC1800000291.mm.1	67.54	T	Kif20a	kinesin family member 20A	Coding	-48.89	2.05e-05	0.001
TC1000000820.mm.1	16.15	T	Ptbp1	polypyrimidine tract binding protein 1	Multiple_Complex	-48.81	0.0008	0.0165
TC0100003783.mm.1	42.73	T	Cenpf	centromere protein F	Multiple_Complex	-48.79	4.06e-06	0.0003
TC0400000499.mm.1	-8.31	T	Tmod1	tropomodulin 1	Multiple_Complex	-48.73	1.74e-10	1.35e-07
TC0200001757.mm.1	107.26	T	Casc5	cancer susceptibility candidate 5	Multiple_Complex	-48.58	0.0002	0.0057
TC0800001737.mm.1	-6.67	T	Gas6	growth arrest specific 6	Coding	-48.54	0.0007	0.0148
TC0700004632.mm.1	-1.02	T	Pira1	paired-Ig-like receptor A1 (Pira1), mRNA.	Multiple_Complex	-48.52	7.81e-09	2.33e-06
TC0900002036.mm.1	41.83	T	Chek1	checkpoint kinase 1	Multiple_Complex	-48.47	0.0005	0.0118
TC0900001070.mm.1	-12.84	T	Myo6	myosin VI	Multiple_Complex	-48.24	0.0002	0.0061
TC0X00001710.mm.1	1.71	T	Mid1	midline 1; midline 1 (Mid1), transcript variant 2, mRNA.	Multiple_Complex	-48.15	1.95e-05	0.001
TC0700003771.mm.1	-4.13	T	Capn5	calpain 5	Multiple_Complex	-48	2.93e-05	0.0013
TC0700002477.mm.1	141.69	T	Fosb	FBJ osteosarcoma oncogene B	Coding	-47.96	0.0005	0.0119
TC0700001624.mm.1	58.91	T	Wee1	WEE 1 homolog 1 (S. pombe)	Multiple_Complex	-47.72	1.85e-05	0.0009
TC1800001122.mm.1	1.04	T	Proc	protein C; protein C (Proc), transcript variant 4, long non-coding RNA.	Multiple_Complex	-47.72	1.83e-11	2.81e-08
TC1100001848.mm.1	-4.61	T	Kcnj16	potassium inwardly-rectifying channel, subfamily J, member 16	Coding	-47.51	1.01e-08	2.84e-06
TC0400004094.mm.1	-1.01	T	Rnf207	ring finger protein 207	Multiple_Complex	-47.49	6.26e-05	0.0024
TC0700004634.mm.1	-1	T	Gm14548; Pira11; Pira2; Pira4; Pira7; Pira1	predicted gene 14548; paired-Ig-like receptor A11; paired-Ig-like receptor A2; paired-Ig-like receptor A4; paired-Ig-like receptor A7; Synthetic construct Mus musculus clone IMAGE:100066286, MGC:195423 paired-Ig-like receptor A2 (Pira2) mRNA, encodes complete protein.; Synthetic construct Mus musculus clone IMAGE:100066296, MGC:195433 paired-Ig-like receptor A4 (Pira4) mRNA, encodes complete prot…	Coding	-47.45	6.09e-09	1.92e-06
TC1100001359.mm.1	2.99	T	Srsf1	serine/arginine-rich splicing factor 1	Multiple_Complex	-47.07	0.0017	0.0278	Intron Retention	0.42
TC0600003016.mm.1	-1.77	T	Lrtm2	leucine-rich repeats and transmembrane domains 2	Coding	-46.98	1.3e-10	1.1e-07	Cassette Exon	0.23
TC0100003104.mm.1	-7.4	T	Adora1	adenosine A1 receptor	Coding	-46.95	1.82e-07	2.62e-05
TC0300002838.mm.1	-1.77	T	Tmem56	transmembrane protein 56	Multiple_Complex	-46.65	0.0001	0.0046	Cassette Exon	0.32
TC0600001634.mm.1	1.17	T	Ptpro	protein tyrosine phosphatase, receptor type, O	Coding	-46.44	5.04e-07	5.75e-05
TC1000001298.mm.1	35.21	T	Nap1l1	nucleosome assembly protein 1-like 1	Coding	-46.32	5.6e-06	0.0004
TC0200000461.mm.1	-1.01	T	Adamts13	a disintegrin-like and metallopeptidase (reprolysin type) with thrombospondin type 1 motif, 13; Synthetic construct Mus musculus clone IMAGE:100062198, MGC:190410 a disintegrin-like and metallopeptidase (reprolysin type) with thrombospondin type 1 motif, 13 (Adamts13) mRNA, encodes complete protein.	Multiple_Complex	-46.09	5.14e-07	5.84e-05
TC1100003857.mm.1	58.04	T	Kif18b	kinesin family member 18B	Multiple_Complex	-46.02	0.0023	0.0349
TC1400001935.mm.1	22.81	T	Dlgap5	discs, large (Drosophila) homolog-associated protein 5	Multiple_Complex	-45.89	2.68e-09	1.04e-06
TC0700000816.mm.1	1.01	T	Vrk3	vaccinia related kinase 3	Multiple_Complex	-45.82	2.04e-09	8.38e-07
TC0300000168.mm.1	-5.65	T	Pld1	phospholipase D1	Multiple_Complex	-45.79	0.0006	0.0139
TC0X00003116.mm.1	81.58	T	Dcx	doublecortin	Multiple_Complex	-45.76	0.0001	0.0043
TC1100003999.mm.1	-4.76	T	Abca8a	ATP-binding cassette, sub-family A (ABC1), member 8a; Synthetic construct Mus musculus clone IMAGE:100069476, MGC:199378 ATP-binding cassette, sub-family A (ABC1), member 8a (Abca8a) mRNA, encodes complete protein.	Multiple_Complex	-45.74	9.64e-05	0.0033
TC0300002481.mm.1	-2.85	T	Adamtsl4	ADAMTS-like 4	Multiple_Complex	-45.55	4.11e-06	0.0003
TC0200003103.mm.1	52.7	T	Mastl	microtubule associated serine/threonine kinase-like	Multiple_Complex	-45.54	0.0005	0.0122
TC1100000422.mm.1	-3.9	T	Atp10b	ATPase, class V, type 10B	Multiple_Complex	-45.44	0.0025	0.0374
TC0200003317.mm.1	-1.99	T	Slc2a8	solute carrier family 2, (facilitated glucose transporter), member 8	Multiple_Complex	-45.38	2.07e-05	0.001
TC0900003016.mm.1	-2.47	T	Tex264	testis expressed gene 264; testis expressed gene 264 (Tex264), transcript variant 1, mRNA.	Multiple_Complex	-45.22	0.0001	0.0036
TC0700004633.mm.1	1.05	T	Gm15448	predicted gene 15448	Coding	-45.22	6.77e-09	2.08e-06
TC0700004635.mm.1	1.08	T	Lilra6	leukocyte immunoglobulin-like receptor, subfamily A (with TM domain), member 6	Multiple_Complex	-45.02	3.26e-09	1.19e-06
TC0700002139.mm.1	1.07	T	Gm15925	predicted gene 15925 [Source:MGI Symbol;Acc:MGI:3801830]	Pseudogene	-44.91	5.78e-09	1.86e-06
TC1500000731.mm.1	-3.18	T	Tef	thyrotroph embryonic factor	Multiple_Complex	-44.9	2.17e-05	0.0011
TC0900000854.mm.1	123.37	T	2810417H13Rik	RIKEN cDNA 2810417H13 gene	Multiple_Complex	-44.63	7.34e-06	0.0005	Alternative 3' Acceptor Site	0.22
TC0200003245.mm.1	2.06	T	Ntng2; 6530402F18Rik	netrin G2; RIKEN cDNA 6530402F18 gene	Multiple_Complex	-44.59	0.0028	0.0406
TC1300001006.mm.1	-40.01	T	Hapln1	hyaluronan and proteoglycan link protein 1	Multiple_Complex	-44.53	1.81e-07	2.6e-05
TC0200005072.mm.1	-6.96	T	Ptprt	protein tyrosine phosphatase, receptor type, T; Synthetic construct Mus musculus clone IMAGE:100069486, MGC:199388 protein tyrosine phosphatase, receptor type, T (Ptprt) mRNA, encodes complete protein.	Multiple_Complex	-44.46	7.72e-06	0.0005
TC0600002496.mm.1	-1.64	T	Tcf7l1	transcription factor 7 like 1 (T cell specific, HMG box)	Multiple_Complex	-44.18	2.92e-06	0.0002
TC0300001528.mm.1	5.51	T	Fubp1	far upstream element (FUSE) binding protein 1	Multiple_Complex	-44.07	0.0003	0.0084
TC0700004631.mm.1	1.11	T	Pirb; Pira1	paired Ig-like receptor B; Synthetic construct Mus musculus clone IMAGE:100066306, MGC:195443 paired-Ig-like receptor A1 (Pira1) mRNA, encodes complete protein.	Multiple_Complex	-44.06	5.39e-09	1.76e-06
TC0900000500.mm.1	-35.56	T	Mcam	melanoma cell adhesion molecule	Multiple_Complex	-44.06	0.0008	0.0168	Cassette Exon	0.21
TC0100002656.mm.1	-95.64	T	Dock10	dedicator of cytokinesis 10; dedicator of cytokinesis 10 (Dock10), mRNA.	Multiple_Complex	-43.96	7.58e-07	7.89e-05
TC0700001673.mm.1	-2.29	T	Insc	inscuteable homolog (Drosophila)	Multiple_Complex	-43.82	2.64e-08	5.87e-06
TC0X00000808.mm.1	-3.4	T	Dmd	dystrophin, muscular dystrophy	Multiple_Complex	-43.72	1.17e-08	3.18e-06	Cassette Exon	0.31
TC0700002057.mm.1	2.42	T	Ap2a2	adaptor-related protein complex 2, alpha 2 subunit	Multiple_Complex	-43.47	4.58e-10	2.73e-07
TC0X00000693.mm.1	-44.72	T	Plxnb3	plexin B3	Multiple_Complex	-43.45	1.42e-06	0.0001	Cassette Exon	0.24
TC0700002140.mm.1	-1.01	T	Gm10693	predicted pseudogene 10693	Pseudogene	-43.44	8.65e-09	2.52e-06
TC0800000328.mm.1	1.04	T	Plpp5	phospholipid phosphatase 5	Multiple_Complex	-43.38	7.11e-05	0.0026
TC1200001420.mm.1	37.7	T	Gen1	Gen homolog 1, endonuclease (Drosophila)	Multiple_Complex	-43.29	1.87e-05	0.0009
TC1900000991.mm.1	-4.43	T	Cdc42ep2	CDC42 effector protein (Rho GTPase binding) 2	Coding	-43.2	1.97e-12	6.33e-09
TC0100002772.mm.1	8.27	T	A730008H23Rik; Hjurp; 6430706D22Rik	RIKEN cDNA A730008H23 gene; Holliday junction recognition protein; RIKEN cDNA 6430706D22 gene; RIKEN cDNA 6430706D22 gene (6430706D22Rik), non-coding RNA.	Multiple_Complex	-42.84	1.13e-06	0.0001
TC0300001318.mm.1	-1.01	T	Col25a1	collagen, type XXV, alpha 1; collagen, type XXV, alpha 1 (Col25a1), transcript variant 3, mRNA.	Multiple_Complex	-42.72	4.78e-07	5.52e-05
TC1100000859.mm.1	-4.67	T	Gas7	growth arrest specific 7	Multiple_Complex	-42.6	3.33e-09	1.21e-06	Alternative 3' Acceptor Site	0.28
TC0800002674.mm.1	48.32	T	Tox3	TOX high mobility group box family member 3	Multiple_Complex	-42.57	2.9e-11	3.85e-08
TC1200002389.mm.1	2.96	T	Hsp90aa1	heat shock protein 90, alpha (cytosolic), class A member 1; heat shock protein 90, alpha (cytosolic), class A member 1 (Hsp90aa1), mRNA.	Multiple_Complex	-42.53	3.87e-07	4.66e-05
TC0700002138.mm.1	-1.1	T	Gm15930	predicted gene 15930 [Source:MGI Symbol;Acc:MGI:3805554]	Pseudogene	-42.5	1.03e-08	2.88e-06
TC0400002638.mm.1	-1.14	T	Aldob	aldolase B, fructose-bisphosphate	Multiple_Complex	-42.44	1.53e-06	0.0001
TC0300000240.mm.1	31.99	T			NonCoding	-42.43	0.0065	0.0728
TC0500003310.mm.1	-27.81	T	Phkg1	phosphorylase kinase gamma 1	Multiple_Complex	-42.4	1.12e-07	1.81e-05
TC1300000179.mm.1	4.71	T	Hist1h2bp	histone cluster 1, H2bp	Coding	-42.34	8.79e-06	0.0005
TC1500002292.mm.1	-2.48	T	Sp7	Sp7 transcription factor 7	Coding	-42.29	5.51e-07	6.16e-05
TC1900000906.mm.1	-2.84	T	Carns1	carnosine synthase 1	Coding	-42.24	2.57e-07	3.41e-05
TC1700002240.mm.1	-153.49	T	Daam2	dishevelled associated activator of morphogenesis 2	Coding	-42.2	3.22e-06	0.0002
TC1800001749.mm.1	-4.01	T	Ppp2r2b	protein phosphatase 2, regulatory subunit B, beta; protein phosphatase 2 (formerly 2A), regulatory subunit B (PR 52), beta isoform	Multiple_Complex	-42.16	0.0013	0.0229
TC1600000379.mm.1	1.63	T	Ccdc50	coiled-coil domain containing 50; coiled-coil domain containing 50 (Ccdc50), transcript variant 1, mRNA.	Multiple_Complex	-42.12	1.92e-05	0.001	Cassette Exon	0.34
TC1400000684.mm.1	-1.07	T	Trav21-dv12; Trac; Trav6-7-dv9; Traj58; Traj56; Traj53; Traj52; Traj50; Traj49; Traj48; Traj45; Traj44; Traj43; Traj42; Traj41; Traj40; Traj39; Traj37; Traj34; Traj33; Traj32; Traj31; Traj30; Traj28; Traj27; Traj26; Traj24; Traj23; Traj22; Traj21; Traj20; Traj19; Traj18; Traj17; Traj16; Traj15; Traj13; Traj12; Traj11; Traj9; Traj7; Traj6; Traj4; Trav6-6; Trav11; Trav3-4; Trav12-3; Traj5; Trav20; …	T cell receptor alpha variable 21-DV12; T cell receptor alpha constant; T cell receptor alpha variable 6-7-DV9; T cell receptor alpha joining 58; T cell receptor alpha joining 56; T cell receptor alpha joining 53; T cell receptor alpha joining 52; T cell receptor alpha joining 50; T cell receptor alpha joining 49; T cell receptor alpha joining 48; T cell receptor alpha joining 45; T cell receptor…	Multiple_Complex	-42	1.26e-09	5.86e-07	Alternative 3' Acceptor Site	0.25
TC1100000880.mm.1	31.52	T	Myh10	myosin, heavy polypeptide 10, non-muscle	Multiple_Complex	-41.99	0.0002	0.0052
TC1900001661.mm.1	-1.28	T	Xpnpep1	X-prolyl aminopeptidase (aminopeptidase P) 1, soluble; X-prolyl aminopeptidase (aminopeptidase P) 1, soluble (Xpnpep1), mRNA.	Multiple_Complex	-41.95	1.11e-06	0.0001
TC1500002223.mm.1	31.44	T	Lima1	LIM domain and actin binding 1	Multiple_Complex	-41.94	9.57e-06	0.0006	Cassette Exon	0.21
TC0400000377.mm.1	-1.39	T	Dnaic1	dynein, axonemal, intermediate chain 1	Multiple_Complex	-41.88	5.81e-06	0.0004
TC0600000044.mm.1	-1.54	T	Tac1	tachykinin 1	Multiple_Complex	-41.36	3.26e-05	0.0014	Cassette Exon	0.27
TC0600002312.mm.1	-1.08	T	9130019P16Rik	RIKEN cDNA 9130019P16 gene	NonCoding	-41.23	4.01e-06	0.0003
TC0700001451.mm.1	-4.87	T	Stim1	stromal interaction molecule 1	Multiple_Complex	-40.86	6.04e-06	0.0004	Cassette Exon	0.25
TC0400002987.mm.1	-58.89	T	Slc24a2	solute carrier family 24 (sodium/potassium/calcium exchanger), member 2	Multiple_Complex	-40.85	1.06e-06	0.0001
TC1100003462.mm.1	-11.11	T	Ypel2	yippee-like 2 (Drosophila)	Coding	-40.84	0.0002	0.0064
TC1800001637.mm.1	-58.17	T	Slc14a1	solute carrier family 14 (urea transporter), member 1	Multiple_Complex	-40.74	9.94e-12	1.84e-08
TC0300002312.mm.1	-6.51	T	Sema4a; Mir7011	sema domain, immunoglobulin domain (Ig), transmembrane domain (TM) and short cytoplasmic domain, (semaphorin) 4A; microRNA 7011	Multiple_Complex	-40.71	2.43e-08	5.49e-06
TC1800000568.mm.1	40.85	T	Lmnb1	lamin B1	Multiple_Complex	-40.44	2.76e-08	6.07e-06
TC1500001127.mm.1	27.84	T	Hnrnpa1; Gm5643; Gm10052	heterogeneous nuclear ribonucleoprotein A1; predicted gene 5643 (Gm5643), non-coding RNA.; heterogeneous nuclear ribonucleoprotein A1 pseudogene; predicted pseudogene 10052 (Gm10052), non-coding RNA.; heterogeneous nuclear ribonucleoprotein A1 (Hnrnpa1), transcript variant 2, mRNA.; heterogeneous nuclear ribonucleoprotein A1 (Hnrnpa1), transcript variant 1, mRNA.	Multiple_Complex	-40.43	2.52e-07	3.36e-05	Alternative 3' Acceptor Site	0.23
TC0400001728.mm.1	-2.17	T	Camk2n1	calcium/calmodulin-dependent protein kinase II inhibitor 1	Multiple_Complex	-40.43	2.73e-07	3.56e-05
TC1100003646.mm.1	-1.49	T	Srcin1	SRC kinase signaling inhibitor 1	Multiple_Complex	-40.36	0.0002	0.0057
TC1500000278.mm.1	1.06	T	Grhl2	grainyhead-like 2 (Drosophila)	Multiple_Complex	-40.23	1.89e-06	0.0002
TC0700002972.mm.1	-2.39	T	Myh14	myosin, heavy polypeptide 14; myosin, heavy polypeptide 14 (Myh14), mRNA.	Multiple_Complex	-40.14	1.63e-08	4.09e-06	Cassette Exon	0.47
TC0900002593.mm.1	65.42	T	Ccnb2	cyclin B2	Coding	-39.8	7.83e-07	8.09e-05
TC1700000924.mm.1	-1.54	T	Tfeb	transcription factor EB	Multiple_Complex	-39.75	4.16e-07	4.95e-05	Cassette Exon	0.27
TC1700000431.mm.1	1.09	T	Itpr3; Mir7677	inositol 1,4,5-triphosphate receptor 3; microRNA 7677	Multiple_Complex	-39.55	1.43e-05	0.0008
TC0700000573.mm.1	1.05	T	Atp4a	ATPase, H+/K+ exchanging, gastric, alpha polypeptide	Multiple_Complex	-39.43	2.45e-07	3.29e-05
TC1700002497.mm.1	45.12	T	Ndc80	NDC80 homolog, kinetochore complex component (S. cerevisiae)	Multiple_Complex	-39.32	6.97e-05	0.0026	Alternative 3' Acceptor Site	0.23
TC1600001254.mm.1	51.86	T	Mcm4	minichromosome maintenance deficient 4 homolog (S. cerevisiae)	Coding	-39.19	0.0041	0.0527
TC0600002200.mm.1	39.04	T	Ezh2	enhancer of zeste 2 polycomb repressive complex 2 subunit; enhancer of zeste homolog 2 (Drosophila)	Multiple_Complex	-39.14	1.73e-07	2.52e-05
TC0800000661.mm.1	-5.27	T	Spock3	sparc/osteonectin, cwcv and kazal-like domains proteoglycan 3	Multiple_Complex	-39.05	4.65e-08	9.1e-06
TC1100003345.mm.1	-70.95	T	Myo1d	myosin ID	Multiple_Complex	-38.97	0.0006	0.0132
TC0200002482.mm.1	-1.93	T	Tox2	TOX high mobility group box family member 2	Coding	-38.96	6.31e-07	6.87e-05
TC0700000769.mm.1	-1.02	T	Klk14	kallikrein related-peptidase 14	Coding	-38.91	3.01e-09	1.13e-06
TC0300002114.mm.1	-1.87	T	Rarres1	retinoic acid receptor responder (tazarotene induced) 1	Coding	-38.65	4.07e-07	4.85e-05	Alternative 5' Donor Site	0.26
TC1200001468.mm.1	-1.05	T	Atp6v1c2	ATPase, H+ transporting, lysosomal V1 subunit C2	Coding	-38.63	2.89e-09	1.09e-06
TC0400004153.mm.1	-129.81	T	Tmem88b	transmembrane protein 88B	Multiple_Complex	-38.51	5.79e-07	6.4e-05
TC0800000972.mm.1	-1.15	T	Dnase2a; Gm38426	deoxyribonuclease II alpha; predicted gene, 38426; ES cells cDNA, RIKEN full-length enriched library, clone:2410038B05 product:unclassifiable, full insert sequence.	Multiple_Complex	-38.45	0.0001	0.0036	Cassette Exon	0.28
TC0600000637.mm.1	-1.99	T	Creb5; 9430076C15Rik	cAMP responsive element binding protein 5; RIKEN cDNA 9430076C15 gene; RIKEN cDNA 9430076C15 gene (9430076C15Rik), non-coding RNA.	Multiple_Complex	-38.42	1.44e-06	0.0001	Cassette Exon	0.27
TC0200004568.mm.1	44.06	T	Bub1	budding uninhibited by benzimidazoles 1 homolog (S. cerevisiae)	Multiple_Complex	-38.2	8.94e-05	0.0031
TC0800003171.mm.1	-169.55	T	Agt	angiotensinogen (serpin peptidase inhibitor, clade A, member 8); Synthetic construct Mus musculus clone IMAGE:100062769, MGC:190955 angiotensinogen (serpin peptidase inhibitor, clade A, member 8) (Agt) mRNA, encodes complete protein.	Coding	-38.05	4.33e-07	5.11e-05
TC0100000886.mm.1	-3.29	T	Ramp1	receptor (calcitonin) activity modifying protein 1	Multiple_Complex	-38.01	5.06e-11	5.59e-08	Cassette Exon	0.27
TC0200000953.mm.1	-1.85	T	Scn2a1	sodium channel, voltage-gated, type II, alpha 1	Multiple_Complex	-37.78	0.001	0.0188
TC0300000068.mm.1	1.06	T	Chmp4c	charged multivesicular body protein 4C	Multiple_Complex	-37.71	1.2e-06	0.0001
TC1400002290.mm.1	35.4	T	Cdca2	cell division cycle associated 2	Multiple_Complex	-37.51	0.034	0.2134
TC0500001428.mm.1	47.18	T	Kntc1	kinetochore associated 1	Coding	-37.28	8.54e-05	0.003
TC0900001864.mm.1	-1.53	T	S1pr5	sphingosine-1-phosphate receptor 5	Coding	-37.26	5.75e-11	6.15e-08
TC0600000902.mm.1	-6.65	T	Eva1a	eva-1 homolog A (C. elegans)	Multiple_Complex	-37.01	4.18e-11	4.97e-08	Alternative 5' Donor Site	0.23
TC0300001289.mm.1	15.43	T	Zgrf1	zinc finger, GRF-type containing 1	Multiple_Complex	-36.89	7.2e-05	0.0026
TC1100003046.mm.1	-4.2	T	Efnb3	ephrin B3	Coding	-36.86	7.57e-08	1.33e-05	Cassette Exon	0.35
TC0200004396.mm.1	-16.29	T	Rasgrp1	RAS guanyl releasing protein 1; RAS guanyl releasing protein 1 (Rasgrp1), mRNA.	Multiple_Complex	-36.77	4.52e-06	0.0003
TC0300002352.mm.1	25.37	T	Cks1b	CDC28 protein kinase 1b	Coding	-36.74	2.2e-07	3.02e-05
TC1100002001.mm.1	-2.26	T	Slc26a11	solute carrier family 26, member 11	Multiple_Complex	-36.69	1.06e-05	0.0006
TC1300002498.mm.1	-7.97	T	Arhgef28	Rho guanine nucleotide exchange factor (GEF) 28	Multiple_Complex	-36.59	1.81e-06	0.0002
TC0200002857.mm.1	1.14	T	1700080N15Rik	RIKEN cDNA 1700080N15 gene	NonCoding	-36.57	1.14e-08	3.13e-06
TC1100004038.mm.1	-1.07	T	Cpsf4l	cleavage and polyadenylation specific factor 4-like	Multiple_Complex	-36.4	7.91e-12	1.58e-08
TC0700001169.mm.1	-47.87	T	Pde8a	phosphodiesterase 8A	Multiple_Complex	-36.25	2.58e-06	0.0002	Cassette Exon	0.29
TC1000002629.mm.1	-1.29	T	Stab2	stabilin 2	Multiple_Complex	-36.19	4.85e-09	1.61e-06	Cassette Exon	0.21
TC1100000956.mm.1	-31.31	T	Pld2	phospholipase D2	Multiple_Complex	-36.16	6.13e-05	0.0023	Cassette Exon	0.31
TC0500002252.mm.1	-3.13	T	Htra3	HtrA serine peptidase 3	Multiple_Complex	-36.15	8.56e-08	1.46e-05
TC0500000494.mm.1	46.72	T	Ncapg	non-SMC condensin I complex, subunit G; on-SMC condensin I complex, subunit G	Multiple_Complex	-36.14	6.38e-05	0.0024	Alternative 5' Donor Site	0.32
TC0200001620.mm.1	32.45	T	Kif18a	kinesin family member 18A	Multiple_Complex	-36.12	6.82e-05	0.0025	Alternative 3' Acceptor Site	0.23
TC0300002242.mm.1	2.02	T	Trim2	tripartite motif-containing 2	Multiple_Complex	-36.06	1.12e-10	9.91e-08
TC1500001568.mm.1	28.44	T	Atad2	ATPase family, AAA domain containing 2	Multiple_Complex	-35.99	0.0456	0.2555
TC0500000597.mm.1	-36.23	T	C030018K13Rik	RIKEN cDNA C030018K13 gene; RIKEN cDNA C030018K13 gene (C030018K13Rik), transcript variant 1, non-coding RNA.; RIKEN cDNA C030018K13 gene (C030018K13Rik), transcript variant 2, non-coding RNA.; RIKEN cDNA C030018K13 gene (C030018K13Rik), transcript variant 3, non-coding RNA.	NonCoding	-35.96	2.94e-06	0.0002
TC0600003598.mm.1	-16.16	T	Cml3	camello-like 3; camello-like 3, mRNA (cDNA clone MGC:103086 IMAGE:4975242), complete cds.	Multiple_Complex	-35.91	6.54e-10	3.58e-07
TC0900002656.mm.1	-1.2	T	Unc13c	unc-13 homolog C (C. elegans)	Multiple_Complex	-35.9	6.91e-08	1.24e-05
TC1500002273.mm.1	1.34	T	Krt73	keratin 73	Coding	-35.88	0.0002	0.0062
TC0300002895.mm.1	-82.83	T	Ugt8a	UDP galactosyltransferase 8A	Coding	-35.72	1.95e-06	0.0002
TC1700000566.mm.1	-1.42	T	Cyp4f40	cytochrome P450, family 4, subfamily f, polypeptide 40	Coding	-35.71	7.73e-09	2.31e-06
TC0300000949.mm.1	16.24	T	Txnip	thioredoxin interacting protein	Multiple_Complex	-35.61	0.0005	0.0114	Alternative 3' Acceptor Site	0.25
TC0500002580.mm.1	-1.2	T	Tec	tec protein tyrosine kinase; cytoplasmic tyrosine kinase, Dscr28C related (Drosophila); tec protein tyrosine kinase (Tec), transcript variant 2, mRNA.; tec protein tyrosine kinase (Tec), transcript variant 3, mRNA.	Multiple_Complex	-35.4	8.15e-06	0.0005
TC1500001772.mm.1	-4.15	T	Oplah	5-oxoprolinase (ATP-hydrolysing)	Multiple_Complex	-35.39	2.84e-07	3.67e-05
TC0200000636.mm.1	-10.07	T	Gsn	gelsolin	Multiple_Complex	-35.35	2.35e-07	3.18e-05	Cassette Exon	0.31
TC0200000438.mm.1	-5.86	T	Kcnt1	potassium channel, subfamily T, member 1; Synthetic construct Homo sapiens clone IMAGE:9094540; MGC:199306 potassium channel, subfamily T, member 1 (Kcnt1) gene, encodes complete protein.	Multiple_Complex	-35.29	6.26e-05	0.0024
TC0700002617.mm.1	-1.79	T	Atp1a3	ATPase, Na+/K+ transporting, alpha 3 polypeptide (Atp1a3), mRNA.; ATPase, Na+/K+ transporting, alpha 3 polypeptide	Multiple_Complex	-35.24	4.32e-08	8.59e-06
TC1900000888.mm.1	-4.9	T	Tcirg1	T cell, immune regulator 1, ATPase, H+ transporting, lysosomal V0 protein A3	Multiple_Complex	-35.07	0.0012	0.0216
TC0600002221.mm.1	-2.9	T	Zfp467	zinc finger protein 467	Multiple_Complex	-35.03	6.6e-07	7.1e-05
TC0900001768.mm.1	-1.47	T	Endod1	endonuclease domain containing 1	Coding	-34.98	4.49e-07	5.25e-05
TC1100002687.mm.1	1.16	T	Gm12202	predicted gene 12202 [Source:MGI Symbol;Acc:MGI:3650184]	Pseudogene	-34.94	1.4e-06	0.0001
TC0400001783.mm.1	-7.02	T	Arhgef19	Rho guanine nucleotide exchange factor (GEF) 19	Multiple_Complex	-34.93	4.34e-08	8.6e-06	Cassette Exon	0.25
TC0500000138.mm.1	-1.89	T	Magi2	membrane associated guanylate kinase, WW and PDZ domain containing 2	Multiple_Complex	-34.9	5.96e-06	0.0004	Cassette Exon	0.5
TC1800001000.mm.1	-2.46	T	Osbpl1a	oxysterol binding protein-like 1A; Synthetic construct Mus musculus clone IMAGE:100016432, MGC:184561 oxysterol binding protein-like 1A (Osbpl1a) mRNA, encodes complete protein.; oxysterol binding protein-like 1A (Osbpl1a), transcript variant 7, non-coding RNA.	Multiple_Complex	-34.89	1e-06	9.85e-05
TC0500001019.mm.1	-5.24	T	Gm26703	predicted gene, 26703 [Source:MGI Symbol;Acc:MGI:5477197]	NonCoding	-34.87	8.78e-10	4.48e-07	Alternative 3' Acceptor Site	0.24
TC0800002441.mm.1	1.58	T	Fcho1	FCH domain only 1; FCH domain only 1 (Fcho1), transcript variant 1, mRNA.	Multiple_Complex	-34.79	0.0064	0.0719	Alternative 5' Donor Site	0.21
TC0100001303.mm.1	79.51	T	Aspm	asp (abnormal spindle)-like, microcephaly associated (Drosophila)	Multiple_Complex	-34.65	9.24e-06	0.0005
TC1300001908.mm.1	-1.06	T			NonCoding	-34.63	1.77e-09	7.56e-07
TC0200004940.mm.1	-2.46	T	Snta1	syntrophin, acidic 1	Multiple_Complex	-34.62	5.1e-08	9.76e-06
TC0600002654.mm.1	1.17	T	Gkn3	gastrokine 3	Coding	-34.58	9.91e-05	0.0034
TC0200002439.mm.1	-49.48	T	Ppp1r16b	protein phosphatase 1, regulatory (inhibitor) subunit 16B	Multiple_Complex	-34.48	5.45e-07	6.12e-05
TC1300001762.mm.1	-17.8	T	Serpinb1a	serine (or cysteine) peptidase inhibitor, clade B, member 1a	Coding	-34.33	6.22e-10	3.45e-07	Cassette Exon	0.21
TC0700001737.mm.1	-1.23	T	Polr3e	polymerase (RNA) III (DNA directed) polypeptide E	Multiple_Complex	-34.32	0.0006	0.0139	Alternative 5' Donor Site	0.25
TC0400004013.mm.1	31.14	T	Draxin	dorsal inhibitory axon guidance protein	Multiple_Complex	-34.3	1.15e-07	1.85e-05
TC0900001348.mm.1	-5.93	T	Abhd14b	abhydrolase domain containing 14b	Coding	-34.22	1.09e-10	9.75e-08	Cassette Exon	0.25
TC0X00002738.mm.1	8.42	T	Rps4x	ribosomal protein S4, X-linked; ribosomal protein S4, X-linked (Rps4x), mRNA.	Multiple_Complex	-34.13	1.12e-05	0.0006
TC0600002802.mm.1	-1.35	T	Frmd4b	FERM domain containing 4B	Multiple_Complex	-34.13	2.98e-05	0.0014
TC1900000064.mm.1	-2.36	T	4930481A15Rik	RIKEN cDNA 4930481A15 gene; RIKEN cDNA 4930481A15 gene (4930481A15Rik), transcript variant 1, non-coding RNA.; RIKEN cDNA 4930481A15 gene (4930481A15Rik), transcript variant 2, non-coding RNA.	Multiple_Complex	-33.95	1.09e-05	0.0006	Alternative 5' Donor Site	0.3
TC0900001153.mm.1	-8.83	T	Rasgrf1	RAS protein-specific guanine nucleotide-releasing factor 1	Coding	-33.93	5.66e-07	6.28e-05	Cassette Exon	0.24
TC0300001206.mm.1	-2.28	T	Plppr5	phospholipid phosphatase related 5	Coding	-33.86	7.1e-06	0.0004
TC0200000211.mm.1	-14.59	T	Prkcq	protein kinase C, theta	Coding	-33.84	1.87e-05	0.0009
TC0300002237.mm.1	27.28	T	D930015E06Rik	RIKEN cDNA D930015E06 gene	Multiple_Complex	-33.81	2.15e-10	1.57e-07
TC1500001863.mm.1	-35.28	T	Sox10	SRY (sex determining region Y)-box 10; SRY-box containing gene 10	Multiple_Complex	-33.7	2.72e-11	3.67e-08
TC1100003997.mm.1	-3.58	T	Abca8b	ATP-binding cassette, sub-family A (ABC1), member 8b	Multiple_Complex	-33.63	7.7e-08	1.35e-05	Cassette Exon	0.31
TC0200003146.mm.1	-2.91	T	Dpp7	dipeptidylpeptidase 7	Multiple_Complex	-33.62	8.27e-05	0.003
TC0100000636.mm.1	7.15	T	Rqcd1	rcd1 (required for cell differentiation) homolog 1 (S. pombe)	Multiple_Complex	-33.61	0.0002	0.006
TC0600003342.mm.1	-9.1	T	Eps8	epidermal growth factor receptor pathway substrate 8; epidermal growth factor receptor pathway substrate 8 (Eps8), mRNA.	Multiple_Complex	-33.58	2.26e-05	0.0011
TC1800001156.mm.1	24.26	T	Cdc25c	cell division cycle 25C	Coding	-33.55	1.74e-06	0.0002
TC0400004055.mm.1	-2.08	T	Spsb1	splA/ryanodine receptor domain and SOCS box containing 1	Multiple_Complex	-33.4	3.86e-07	4.66e-05	Alternative 5' Donor Site	0.36
TC0300000583.mm.1	4.96	T			NonCoding	-33.39	0.0015	0.0256
TC1100002170.mm.1	29.18	T	H2afv	H2A histone family, member V	Coding	-33.38	6.1e-07	6.68e-05	Cassette Exon	0.23
TC1500000603.mm.1	-2.89	T	Kifc2	kinesin family member C2; Synthetic construct Mus musculus clone IMAGE:100062498, MGC:190894 kinesin family member C2 (Kifc2) mRNA, encodes complete protein.	Coding	-33.36	6.99e-05	0.0026
TC0300003010.mm.1	17.02	T	Gm19693	PREDICTED: predicted gene, 19693, transcript variant 1 (Gm19693), miscRNA.	NonCoding	-33.34	0.0027	0.0387
TC0800002739.mm.1	-6.02	T	Kifc3	kinesin family member C3	Coding	-33.18	6.92e-07	7.35e-05	Cassette Exon	0.34
TC0900000742.mm.1	1.2	T	Hcn4	hyperpolarization-activated, cyclic nucleotide-gated K+ 4; Synthetic construct Mus musculus clone IMAGE:100068371, MGC:195915 hyperpolarization-activated, cyclic nucleotide-gated K+ 4 (Hcn4) mRNA, encodes complete protein.	Coding	-33.15	0.0057	0.0663
TC0200000577.mm.1	1.32	T	Ciz1	CDKN1A interacting zinc finger protein 1; CDKN1A interacting zinc finger protein	Multiple_Complex	-33.02	7.33e-06	0.0005	Intron Retention	0.38
TC0900000313.mm.1	-27.07	T	Kirrel3	kin of IRRE like 3 (Drosophila)	Multiple_Complex	-32.96	1.35e-05	0.0007	Cassette Exon	0.27
TC1400002222.mm.1	1.05	T	Tdh	L-threonine dehydrogenase	Multiple_Complex	-32.93	1.42e-10	1.16e-07
TC0X00001394.mm.1	-1.16	T	Col4a5	collagen, type IV, alpha 5	Multiple_Complex	-32.92	3.88e-05	0.0017
TC0700000465.mm.1	-1.13	T	Akt2	thymoma viral proto-oncogene 2	Multiple_Complex	-32.92	7.98e-07	8.22e-05
TC1100004049.mm.1	-2.87	T	Btbd17	BTB (POZ) domain containing 17	Multiple_Complex	-32.79	0.0015	0.0259
TC1400001487.mm.1	-2.42	T	Rarb	retinoic acid receptor, beta; retinoic acid receptor, beta (Rarb), mRNA.	Multiple_Complex	-32.7	0.0009	0.0172
TC1000002655.mm.1	27.07	T	Gas2l3	growth arrest-specific 2 like 3	Multiple_Complex	-32.68	1.38e-07	2.11e-05	Intron Retention	0.36
TC0600001462.mm.1	1.11	T	Vwf	Von Willebrand factor homolog; Von Willebrand factor homolog (Vwf), mRNA.	Multiple_Complex	-32.66	2.94e-07	3.77e-05
TC0600001335.mm.1	-1.63	T	Cacna2d4	calcium channel, voltage-dependent, alpha 2/delta subunit 4	Coding	-32.65	2.41e-05	0.0011
TC0200004878.mm.1	-1.43	T	Snph	syntaphilin	Multiple_Complex	-32.58	2.95e-08	6.38e-06
TC1000001684.mm.1	-48.62	T	Syne1	spectrin repeat containing, nuclear envelope 1	Multiple_Complex	-32.57	3.31e-05	0.0015
TC0700001455.mm.1	53.44	T	Rrm1	ribonucleotide reductase M1	Coding	-32.53	0.0006	0.0126	Alternative 3' Acceptor Site	0.21
TC1700002504.mm.1	-1.58	T	Alk	anaplastic lymphoma kinase	Coding	-32.43	0.0007	0.0147
TC0200005015.mm.1	73.96	T	Rbl1	retinoblastoma-like 1 (p107)	Multiple_Complex	-32.29	0.0002	0.0057
TC0200000514.mm.1	-5.46	T	Cercam	cerebral endothelial cell adhesion molecule	Multiple_Complex	-32.28	3.09e-05	0.0014
TC0300001322.mm.1	-46.85	T	Etnppl	ethanolamine phosphate phospholyase	Multiple_Complex	-32.27	1.34e-10	1.12e-07
TC0200002077.mm.1	1.18	T	Snap25	synaptosomal-associated protein 25	Multiple_Complex	-32.25	1.88e-05	0.0009
TC0100003836.mm.1	-3.45	T	Hsd11b1	hydroxysteroid 11-beta dehydrogenase 1	Multiple_Complex	-32.23	9.84e-08	1.63e-05
TC1300000336.mm.1	-3.56	T	Dusp22	dual specificity phosphatase 22	Coding	-32.2	0.0001	0.0046
TC1000000605.mm.1	-2.37	T	Ctnna3	catenin (cadherin associated protein), alpha 3	Multiple_Complex	-32.2	2.53e-05	0.0012
TC0100002965.mm.1	-2.67	T	Steap3	STEAP family member 3	Coding	-32.14	6.84e-06	0.0004
TC1600000752.mm.1	-1.24	T			NonCoding	-32.1	4.42e-11	5.08e-08
TC0500003329.mm.1	2.05	T	Auts2	autism susceptibility candidate 2	Multiple_Complex	-32.09	7.48e-06	0.0005
TC0400002713.mm.1	-1.66	T	Epb41l4b	erythrocyte membrane protein band 4.1 like 4b	Multiple_Complex	-31.88	6.58e-09	2.04e-06
TC0500001096.mm.1	4.22	T	Ccdc18	coiled-coil domain containing 18	Multiple_Complex	-31.82	0.0003	0.0088
TC1300002079.mm.1	-27.35	T	Cxcl14	chemokine (C-X-C motif) ligand 14	Coding	-31.81	4.55e-11	5.18e-08	Cassette Exon	0.23
TC0800003238.mm.1	21.66	T	Trim67	tripartite motif-containing 67	Multiple_Complex	-31.78	0.0021	0.0326
TC0100002544.mm.1	17.5	T	Fn1	fibronectin 1; fibronectin 1 (Fn1), mRNA.	Coding	-31.73	7.9e-07	8.15e-05
TC1200000309.mm.1	1.05	T			NonCoding	-31.72	2.08e-05	0.001
TC0700003539.mm.1	-6.05	T	Ntrk3	neurotrophic tyrosine kinase, receptor, type 3	Multiple_Complex	-31.7	1.52e-07	2.28e-05	Mutually Exclusive Exons	0.28
TC1500002250.mm.1	-11.19	T	Galnt6	UDP-N-acetyl-alpha-D-galactosamine:polypeptide N-acetylgalactosaminyltransferase 6	Coding	-31.69	9.56e-10	4.77e-07
TC0500001102.mm.1	-1.55	T	Gm10419	predicted gene 10419	Multiple_Complex	-31.66	1.54e-05	0.0008	Alternative 5' Donor Site	0.24
TC0400000698.mm.1	1.53	T	Slc31a1	solute carrier family 31, member 1	Multiple_Complex	-31.64	1.03e-05	0.0006
TC1100003941.mm.1	26.89	T	Kpna2	karyopherin (importin) alpha 2	Multiple_Complex	-31.63	0.0017	0.0288
TC1000000813.mm.1	-8.38	T	Hcn2	hyperpolarization-activated, cyclic nucleotide-gated K+ 2	Coding	-31.61	0.0013	0.0233
TC0X00001338.mm.1	-482.44	T	Plp1	proteolipid protein (myelin) 1	Multiple_Complex	-31.53	7.51e-10	3.97e-07
TC1700000839.mm.1	-8.2	T	Rcan2	regulator of calcineurin 2	Coding	-31.46	1.17e-05	0.0007
TC0100003079.mm.1	-81.57	T	Cntn2	contactin 2	Multiple_Complex	-31.45	0.001	0.0187
TC0800001555.mm.1	1.14	T	Disc1	disrupted in schizophrenia 1	Multiple_Complex	-31.44	3.55e-08	7.35e-06
TC1600000264.mm.1	34.57	T	B3gnt5	UDP-GlcNAc:betaGal beta-1,3-N-acetylglucosaminyltransferase 5	Multiple_Complex	-31.39	9.48e-10	4.73e-07
TC0200002026.mm.1	-1.85	T	Prnd; Prnp; Prn; PRND	prion protein dublet; prion protein; prion protein gene complex; prion protein (Prnp), mRNA.; prion protein gene complex (Prn), transcript variant 1, mRNA	Multiple_Complex	-31.37	5.85e-08	1.08e-05
TC1600001320.mm.1	25.5	T	Cdc45	cell division cycle 45	Coding	-31.31	2.02e-06	0.0002
TC0700001855.mm.1	1.61	T	Rnf40	ring finger protein 40	Coding	-31.27	5.21e-06	0.0004
TC1400001931.mm.1	44.25	T	Wdhd1	WD repeat and HMG-box DNA binding protein 1	Multiple_Complex	-31.26	1.19e-05	0.0007
TC1000000696.mm.1	-1.17	T	Pcdh15	protocadherin 15; Synthetic construct Mus musculus clone IMAGE:100069454, MGC:199356 protocadherin 15 (Pcdh15) mRNA, encodes complete protein.; protocadherin 15 (Pcdh15), transcript variant C, mRNA.	Multiple_Complex	-31.24	2.31e-05	0.0011
TC1900000495.mm.1	-3.17	T	Stambpl1	STAM binding protein like 1	Multiple_Complex	-31.15	0.001	0.0192
TC0700003420.mm.1	-1.45	T	Tjp1	tight junction protein 1	Multiple_Complex	-31.15	1.75e-05	0.0009
TC1500002289.mm.1	-2.26	T	Rarg	retinoic acid receptor, gamma	Multiple_Complex	-30.99	4.77e-07	5.51e-05
TC1200000750.mm.1	1	T	Srsf5	serine/arginine-rich splicing factor 5	Multiple_Complex	-30.94	1.14e-05	0.0006	Intron Retention	0.51
TC1400001902.mm.1	-10.98	T	Fermt2	fermitin family homolog 2 (Drosophila)	Multiple_Complex	-30.91	1.38e-05	0.0007
TC0700000655.mm.1	-598.16	T	Slc7a10	solute carrier family 7 (cationic amino acid transporter, y+ system), member 10	Multiple_Complex	-30.85	0.0009	0.018
TC1900000117.mm.1	-14.88	T	Pygm	muscle glycogen phosphorylase	Multiple_Complex	-30.85	1.1e-05	0.0006
TC1800001728.mm.1	1.83	T	Socs6	suppressor of cytokine signaling 6	Multiple_Complex	-30.62	4.34e-05	0.0018
TC1900000356.mm.1	-68.73	T	Trpm3	transient receptor potential cation channel, subfamily M, member 3	Multiple_Complex	-30.57	1.67e-08	4.17e-06	Cassette Exon	0.35
TC0300000729.mm.1	46.79	T	Mex3a	mex3 homolog A (C. elegans)	Multiple_Complex	-30.54	4.22e-11	4.98e-08	Cassette Exon	0.23
TC1800000797.mm.1	3.45	T	Rpl17	ribosomal protein L17	Coding	-30.52	5.45e-05	0.0021
TC1200000334.mm.1	-12.38	T	Agmo	alkylglycerol monooxygenase	Multiple_Complex	-30.49	0.0002	0.0064	Cassette Exon	0.29
TC1500000791.mm.1	-9.04	T	Prr5	proline rich 5 (renal)	Coding	-30.41	4.65e-05	0.0019
TC0X00003197.mm.1	-8.1	T	Shroom2	shroom family member 2; Synthetic construct Homo sapiens clone IMAGE:9094541; MGC:199307 shroom family member 2 (Shroom2) gene, encodes complete protein.	Multiple_Complex	-30.34	7.62e-08	1.34e-05	Cassette Exon	0.36
TC1000002467.mm.1	-4.3	T	Plpp2	phospholipid phosphatase 2	Multiple_Complex	-30.29	1.06e-05	0.0006
TC0800002811.mm.1	-1.11	T	B3gnt9	UDP-GlcNAc:betaGal beta-1,3-N-acetylglucosaminyltransferase 9	Coding	-30.23	1.44e-08	3.72e-06	Alternative 5' Donor Site	0.27
TC1100001632.mm.1	-1.54	T	Stat5a	signal transducer and activator of transcription 5A	Multiple_Complex	-30.13	2.35e-05	0.0011
TC0200002300.mm.1	-1.19	T	Cox4i2	cytochrome c oxidase subunit IV isoform 2	Coding	-29.99	0.0004	0.01
TC1300001096.mm.1	-4.79	T	Gcnt4	glucosaminyl (N-acetyl) transferase 4, core 2 (beta-1,6-N-acetylglucosaminyltransferase)	Coding	-29.97	4.33e-08	8.59e-06	Cassette Exon	0.26
TC1000000717.mm.1	-1.4	T	Ggt1	gamma-glutamyltransferase 1	Multiple_Complex	-29.97	0.016	0.1322	Cassette Exon	0.21
TC0700000009.mm.1	-1.49	T	Cacng8	calcium channel, voltage-dependent, gamma subunit 8	Multiple_Complex	-29.78	1.95e-07	2.75e-05	Alternative 5' Donor Site	0.39
TC1500000604.mm.1	-1.02	T	Ppp1r16a	protein phosphatase 1, regulatory (inhibitor) subunit 16A	Multiple_Complex	-29.76	6.09e-09	1.92e-06
TC1900000508.mm.1	24.46	T	Kif20b	kinesin family member 20B	Coding	-29.69	4.46e-05	0.0018
TC0200002232.mm.1	25.53	T	Gins1	GINS complex subunit 1 (Psf1 homolog)	Multiple_Complex	-29.64	4.24e-08	8.48e-06
TC0400000109.mm.1	3.88	T	Gm11847	predicted gene 11847	Pseudogene	-29.64	7.1e-06	0.0004
TC0400001514.mm.1	-1.59	T	Fndc5	fibronectin type III domain containing 5	Coding	-29.61	4.58e-10	2.73e-07
TC0600001082.mm.1	-2.92	T	Hdac11	histone deacetylase 11	Multiple_Complex	-29.6	9.4e-08	1.57e-05	Cassette Exon	0.27
TC1400002101.mm.1	-1.35	T	Cideb	cell death-inducing DNA fragmentation factor, alpha subunit-like effector B	Multiple_Complex	-29.59	6.01e-08	1.11e-05
TC1700001163.mm.1	1.88	T	Ttc27	tetratricopeptide repeat domain 27	Coding	-29.54	1.8e-06	0.0002
TC0300001398.mm.1	31.59	T	H2afz	H2A histone family, member Z	Multiple_Complex	-29.54	4.29e-09	1.47e-06	Alternative 3' Acceptor Site	0.23
TC0200003447.mm.1	-4.53	T	Lrp1b	low density lipoprotein-related protein 1B (deleted in tumors)	Multiple_Complex	-29.53	1.67e-06	0.0001	Cassette Exon	0.31
TC0100001950.mm.1	-2.04	T	Ppp1r42	protein phosphatase 1, regulatory subunit 42 (Ppp1r42), transcript variant 1, mRNA.; protein phosphatase 1, regulatory subunit 42	Multiple_Complex	-29.39	9.89e-05	0.0034
TC0800001126.mm.1	-3.03	T	Adgrg1	adhesion G protein-coupled receptor G1	Multiple_Complex	-29.27	3.8e-05	0.0016	Cassette Exon	0.41
TC0100003350.mm.1	1.07	T	Tnn	tenascin N	Coding	-29.19	5.68e-08	1.06e-05
TC0300000636.mm.1	1.01	T	Asic5	acid-sensing (proton-gated) ion channel family member 5	Multiple_Complex	-29.18	2.65e-06	0.0002
TC0400000328.mm.1	1.12	T			NonCoding	-29.14	1.73e-05	0.0009
TC1100003245.mm.1	-5.33	T	Abr	active BCR-related gene	Multiple_Complex	-29.11	4.45e-07	5.21e-05
TC1500000568.mm.1	-1.1	T	Zfp707	zinc finger protein 707; zinc finger protein 707 (Zfp707), mRNA.	Multiple_Complex	-29.06	5.25e-05	0.0021
TC0X00000974.mm.1	9.29	T	Nono	non-POU-domain-containing, octamer binding protein	Multiple_Complex	-29.06	6.26e-08	1.14e-05
TC0600000570.mm.1	-6.25	T	Tmem176a	transmembrane protein 176A	Coding	-29	3.46e-05	0.0015
TC1000001768.mm.1	-2.21	T	Phactr2	phosphatase and actin regulator 2	Multiple_Complex	-28.97	1.28e-06	0.0001
TC0900001851.mm.1	29.49	T	Dnmt1	DNA methyltransferase (cytosine-5) 1	Coding	-28.93	0.0001	0.0039
TC1400000385.mm.1	-5.32	T	Grid1	glutamate receptor, ionotropic, delta 1; Synthetic construct Mus musculus clone IMAGE:100068077, MGC:195694 glutamate receptor, ionotropic, delta 1 (Grid1) mRNA, encodes complete protein.	Multiple_Complex	-28.92	0.0004	0.0092
TC1100002099.mm.1	-3.03	T	Osbp2	oxysterol binding protein 2	Multiple_Complex	-28.84	0.0001	0.0035
TC1700002644.mm.1	1.12	T	Gm19696	PREDICTED: predicted gene, 19696, transcript variant 1 (Gm19696), miscRNA.; PREDICTED: predicted gene, 19696, transcript variant 2 (Gm19696), miscRNA.; PREDICTED: predicted gene, 19696, transcript variant 3 (Gm19696), miscRNA.; PREDICTED: predicted gene, 19696, transcript variant 4 (Gm19696), miscRNA.; PREDICTED: predicted gene, 19696, transcript variant 5 (Gm19696), miscRNA.; PREDICTED: predicte…	NonCoding	-28.83	1.99e-07	2.79e-05
TC0600000978.mm.1	4.54	T	Add2	adducin 2 (beta); adducin 2 (beta) (Add2), mRNA.	Multiple_Complex	-28.82	6.78e-10	3.68e-07
TC0400001682.mm.1	1.65	T	Zfp46	zinc finger protein 46	Multiple_Complex	-28.78	5.4e-06	0.0004
TC0500000107.mm.1	-2.01	T	Gm21847	predicted gene, 21847 [Source:MGI Symbol;Acc:MGI:5434011]	Coding	-28.78	2.05e-10	1.52e-07
TC0700001986.mm.1	-4.8	T	Jakmip3	janus kinase and microtubule interacting protein 3; janus kinase and microtubule interacting protein 3 (Jakmip3), mRNA.	Multiple_Complex	-28.77	1.46e-08	3.75e-06
TC1300001556.mm.1	50.4	T	Hist1h2aj	histone cluster 1, H2aj	Multiple_Complex	-28.68	3.73e-06	0.0003
TC0600000931.mm.1	15.41	T			NonCoding	-28.66	0.0008	0.0157
TC0100001858.mm.1	15.25	T	Nek2	NIMA (never in mitosis gene a)-related expressed kinase 2	Multiple_Complex	-28.46	0.0005	0.0113
TC1500000736.mm.1	1.85	T	Xrcc6	X-ray repair complementing defective repair in Chinese hamster cells 6	Multiple_Complex	-28.21	1.13e-05	0.0006
TC0400002949.mm.1	7	T	Psip1	PC4 and SFRS1 interacting protein 1	Multiple_Complex	-28.13	0.0031	0.0434
TC1000000729.mm.1	-1.67	T	Chchd10	coiled-coil-helix-coiled-coil-helix domain containing 10	Coding	-28.12	7.7e-08	1.35e-05	Cassette Exon	0.27
TC0700000285.mm.1	-2.68	T	Dmpk	dystrophia myotonica-protein kinase	Multiple_Complex	-28.1	6.3e-05	0.0024
TC0300000238.mm.1	-1.5	T	Sox2ot; Mir1897	SOX2 overlapping transcript (non-protein coding); microRNA 1897	Multiple_Complex	-28.09	0.0051	0.0615
TC1000002175.mm.1	-2.46	T	Man1a	mannosidase 1, alpha	Multiple_Complex	-28.09	0.0002	0.0059	Cassette Exon	0.27
TC0X00000933.mm.1	-4.15	T	Stard8	START domain containing 8	Multiple_Complex	-28.07	4.09e-05	0.0017
TC0700000515.mm.1	-2.03	T	Lgals4; Lgals6	lectin, galactose binding, soluble 4; lectin, galactose binding, soluble 6; Synthetic construct Mus musculus clone IMAGE:100063923, MGC:193390 lectin, galactose binding, soluble 6 (Lgals6) mRNA, encodes complete protein.	Multiple_Complex	-27.97	1.05e-08	2.92e-06	Cassette Exon	0.27
TC0900000569.mm.1	-32.93	T	2900052N01Rik	RIKEN cDNA 2900052N01 gene; RIKEN cDNA 2900052N01 gene (2900052N01Rik), non-coding RNA.	NonCoding	-27.84	3.82e-08	7.79e-06
TC0300002348.mm.1	-2.58	T	Adam15	a disintegrin and metallopeptidase domain 15 (metargidin)	Multiple_Complex	-27.83	0.0002	0.0055
TC1100001538.mm.1	-9.8	T	Arhgap23; 4933428G20Rik	Rho GTPase activating protein 23; Synthetic construct Mus musculus clone IMAGE:100062849, MGC:190973 RIKEN cDNA 4933428G20 gene (4933428G20Rik) mRNA, encodes complete protein.	Multiple_Complex	-27.77	9.37e-07	9.34e-05
TC0900001226.mm.1	-1.05	T			NonCoding	-27.73	4.51e-08	8.86e-06
TC0200005468.mm.1	8.62	T	Nup188	nucleoporin 188	Multiple_Complex	-27.72	3.03e-09	1.13e-06
TC1700001262.mm.1	-5.98	T	Plekhh2	pleckstrin homology domain containing, family H (with MyTH4 domain) member 2	Coding	-27.71	0.0111	0.1038
TC0100003096.mm.1	-2.62	T	Atp2b4; Mir6903	ATPase, Ca++ transporting, plasma membrane 4; microRNA 6903	Multiple_Complex	-27.66	9.19e-07	9.21e-05
TC0X00000932.mm.1	-1.16	T	Yipf6	Yip1 domain family, member 6	Multiple_Complex	-27.66	1.08e-07	1.76e-05
TC0100002543.mm.1	1.04	T	Abca12	ATP-binding cassette, sub-family A (ABC1), member 12	Multiple_Complex	-27.65	2.74e-09	1.05e-06
TC0500000888.mm.1	15.98	T	2011-09-01	septin 11	Multiple_Complex	-27.64	1.38e-07	2.11e-05
TC0800000821.mm.1	1.46	T	Ap1m1	adaptor-related protein complex AP-1, mu subunit 1	Multiple_Complex	-27.61	6.1e-08	1.12e-05
TC0300001382.mm.1	-3.1	T	Ppp3ca	protein phosphatase 3, catalytic subunit, alpha isoform	Multiple_Complex	-27.61	1.25e-05	0.0007
TC0600002722.mm.1	11.09	T	Nup210	nucleoporin 210	Multiple_Complex	-27.59	4.59e-05	0.0019
TC1300001633.mm.1	104.36	T	Hist1h3e	histone cluster 1, H3e; Synthetic construct Mus musculus clone IMAGE:100062267, MGC:190441 histone cluster 1, H3e (Hist1h3e) mRNA, encodes complete protein.	Coding	-27.57	2.31e-07	3.15e-05	Alternative 5' Donor Site	0.23
TC1400001537.mm.1	-1.49	T	Anxa7	annexin A7	Multiple_Complex	-27.56	2.91e-07	3.74e-05
TC0200003579.mm.1	-1.09	T	Acvr1	activin A receptor, type 1	Multiple_Complex	-27.56	9.92e-07	9.75e-05
TC0300001824.mm.1	-1.61	T	Dnajc19	DnaJ (Hsp40) homolog, subfamily C, member 19	Multiple_Complex	-27.48	0.006	0.0686
TC1700002286.mm.1	44.22	T	Sgol1	shugoshin-like 1 (S. pombe)	Multiple_Complex	-27.45	1.23e-06	0.0001	Alternative 5' Donor Site	0.22
TC1900001617.mm.1	-1.35	T	Nt5c2	5-nucleotidase, cytosolic II; 5'-nucleotidase, cytosolic II	Multiple_Complex	-27.43	0.0003	0.007
TC0600000007.mm.1	-7.14	T	Gng11	guanine nucleotide binding protein (G protein), gamma 11	Coding	-27.42	1.2e-06	0.0001
TC1000001773.mm.1	-3.36	T	Aig1	androgen-induced 1	Multiple_Complex	-27.38	9.82e-09	2.77e-06
TC1100002557.mm.1	-1.09	T	Gabra1	gamma-aminobutyric acid (GABA) A receptor, subunit alpha 1	Multiple_Complex	-27.37	0.0002	0.0057
TC0300000765.mm.1	-5.74	T	Pbxip1	pre B cell leukemia transcription factor interacting protein 1	Multiple_Complex	-27.37	1.5e-08	3.83e-06	Cassette Exon	0.26
TC1200001236.mm.1	-1.43	T	Exoc3l4	exocyst complex component 3-like 4; exocyst complex component 3-like 4 (Exoc3l4), mRNA.	Coding	-27.34	3.31e-06	0.0002
TC0800000541.mm.1	22.67	T	Casp3	caspase 3; caspase 3 (Casp3), mRNA.	Multiple_Complex	-27.28	1.15e-08	3.14e-06	Alternative 3' Acceptor Site	0.23
TC0300002912.mm.1	-4.94	T	Alpk1	alpha-kinase 1	Multiple_Complex	-27.24	1.89e-06	0.0002
TC1900001649.mm.1	-4.33	T	Sorcs1	sortilin-related VPS10 domain containing receptor 1; VPS10 domain receptor protein SORCS 1	Coding	-27.12	0.0039	0.0511
TC0800002406.mm.1	-1.97	T			NonCoding	-27.11	3.14e-11	4.07e-08
TC0500000360.mm.1	26.12	T	Tacc3	transforming, acidic coiled-coil containing protein 3	Multiple_Complex	-27.03	0.0001	0.0043	Alternative 3' Acceptor Site	0.21
TC0600000010.mm.1	-1.33	T	Col1a2	collagen, type I, alpha 2; procollagen type I alpha 2	Multiple_Complex	-27.02	8.67e-05	0.0031
TC1700002050.mm.1	-267	T	Mog	myelin oligodendrocyte glycoprotein	Multiple_Complex	-27.01	8.77e-07	8.87e-05
TC1700002292.mm.1	-1.01	T	Sult1c1	sulfotransferase family, cytosolic, 1C, member 1	Coding	-27.01	2.38e-05	0.0011
TC0400001171.mm.1	1.9	T	Faf1	Fas-associated factor 1	Multiple_Complex	-26.97	4.73e-06	0.0003	Cassette Exon	0.35
TC0700003332.mm.1	4.14	T			NonCoding	-26.93	1.5e-05	0.0008
TC1300001627.mm.1	24.83	T	Gm19658	PREDICTED: predicted gene, 19658 (Gm19658), miscRNA.	NonCoding	-26.91	0.0036	0.0481
TC0500000642.mm.1	-19.19	T	Limch1	LIM and calponin homology domains 1	Multiple_Complex	-26.91	3.07e-05	0.0014	Cassette Exon	0.31
TC0300000308.mm.1	21.25	T	Plk4	polo-like kinase 4	Multiple_Complex	-26.9	3.5e-08	7.28e-06
TC0X00001381.mm.1	1.27	T			NonCoding	-26.87	1.92e-06	0.0002
TC1500001379.mm.1	24.85	T	Pabpc1	poly(A) binding protein, cytoplasmic 1	Multiple_Complex	-26.83	0.0001	0.0041
TC1700001648.mm.1	27.02	T	Hn1l	hematological and neurological expressed 1-like	Coding	-26.81	0.0008	0.0162
TC1100004160.mm.1	-1.49	T	Cant1	calcium activated nucleotidase 1; calcium activated nucleotidase 1 (Cant1), transcript variant 3, mRNA.	Coding	-26.76	0.0024	0.0355
TC0700001888.mm.1	-3.05	T	Inpp5f	inositol polyphosphate-5-phosphatase F	Multiple_Complex	-26.74	4.19e-05	0.0018
TC1000001626.mm.1	-6.34	T	Itga7	integrin alpha 7	Coding	-26.71	6.66e-07	7.15e-05
TC0500002280.mm.1	18.01	T	Nsg1	neuron specific gene family member 1	Coding	-26.7	3.46e-05	0.0015	Cassette Exon	0.23
TC0100000353.mm.1	-5.76	T	Dnah7b	dynein, axonemal, heavy chain 7B	Coding	-26.68	0.0002	0.0068
TC1900000543.mm.1	49.14	T	Cep55	centrosomal protein 55	Multiple_Complex	-26.64	4.52e-05	0.0019
TC1500000331.mm.1	-2.24	T	Oxr1	oxidation resistance 1	Multiple_Complex	-26.63	6.07e-06	0.0004
TC1700001113.mm.1	-2.7	T	Dlgap1	discs, large (Drosophila) homolog-associated protein 1	Multiple_Complex	-26.62	4.53e-06	0.0003	Cassette Exon	0.4
TC0200003632.mm.1	9.72	T	Kcnh7	potassium voltage-gated channel, subfamily H (eag-related), member 7	Multiple_Complex	-26.61	4.29e-06	0.0003
TC0400003275.mm.1	30.67	T	Elavl4	ELAV (embryonic lethal, abnormal vision, Drosophila)-like 4 (Hu antigen D)	Multiple_Complex	-26.59	4.96e-08	9.56e-06
TC0500003176.mm.1	1.01	T	Oas3	2-5 oligoadenylate synthetase 3; 2'-5' oligoadenylate synthetase 3	Multiple_Complex	-26.53	5.04e-06	0.0003
TC0800001863.mm.1	43.58	T	Ckap2	cytoskeleton associated protein 2	Coding	-26.47	5.66e-05	0.0022	Cassette Exon	0.23
TC1700001173.mm.1	-21.11	T	Rasgrp3	RAS, guanyl releasing protein 3	Coding	-26.46	0.0001	0.0038	Cassette Exon	0.25
TC1700002359.mm.1	-2.35	T	Pdzph1	PDZ and pleckstrin homology domains 1	Multiple_Complex	-26.42	4.59e-05	0.0019
TC1600000571.mm.1	-34.79	T	Lsamp	limbic system-associated membrane protein; Synthetic construct Mus musculus clone IMAGE:100016504, MGC:184562 limbic system-associated membrane protein (Lsamp) mRNA, encodes complete protein.	Multiple_Complex	-26.34	4.88e-06	0.0003
TC1400002631.mm.1	1.03	T			NonCoding	-26.31	1.19e-05	0.0007
TC0300000054.mm.1	4.38	T	Zbtb10	zinc finger and BTB domain containing 10	Multiple_Complex	-26.27	1.48e-07	2.23e-05
TC1100000467.mm.1	-1.61	T			NonCoding	-26.27	8.72e-07	8.83e-05
TC1100001395.mm.1	-2.83	T	Tmem100	transmembrane protein 100	Coding	-26.23	2.49e-10	1.74e-07	Cassette Exon	0.2
TC0400004191.mm.1	-151.92	T	Slc6a9	solute carrier family 6 (neurotransmitter transporter, glycine), member 9	Multiple_Complex	-26.21	0.0001	0.0042
TC1500000303.mm.1	1.37	T	Rims2	regulating synaptic membrane exocytosis 2	Multiple_Complex	-26.15	6.89e-06	0.0004
TC0300002797.mm.1	-17.23	T	S1pr1	sphingosine-1-phosphate receptor 1	Coding	-26.13	5.7e-08	1.06e-05	Cassette Exon	0.23
TC0700004148.mm.1	2.71	T	Sox6	SRY (sex determining region Y)-box 6; SRY-box containing gene 6; SRY-box containing gene 6 (Sox6), transcript variant 2, mRNA.	Coding	-26.11	1.62e-06	0.0001
TC0700004441.mm.1	-5.9	T	D7Ertd443e	DNA segment, Chr 7, ERATO Doi 443, expressed	Multiple_Complex	-26.11	1.01e-05	0.0006
TC1300002075.mm.1	1.82	T	H2afy	H2A histone family, member Y	Multiple_Complex	-26.1	7e-05	0.0026
TC0200003880.mm.1	1.13	T	Serping1	serine (or cysteine) peptidase inhibitor, clade G, member 1	Multiple_Complex	-26	3.54e-11	4.39e-08
TC1500000528.mm.1	-4.81	T	Adgrb1	adhesion G protein-coupled receptor B1	Multiple_Complex	-25.97	7.87e-06	0.0005
TC1100004272.mm.1	-354.26	T	2004-09-01	septin 4; septin 4 (Sept4), nuclear gene encoding mitochondrial protein, mRNA.	Multiple_Complex	-25.94	1.06e-08	2.96e-06
TC0400000207.mm.1	29.66	T	Mms22l	MMS22-like, DNA repair protein	Multiple_Complex	-25.93	2.3e-06	0.0002
TC1900000091.mm.1	-1.67	T			NonCoding	-25.9	0.0087	0.0882
TC1000003052.mm.1	-8.84	T	Srgap1	SLIT-ROBO Rho GTPase activating protein 1	Multiple_Complex	-25.89	0.0138	0.1202
TC1500001940.mm.1	22.46	T	Cenpm	centromere protein M	Coding	-25.86	0.014	0.1212
TC1900001765.mm.1	-1.38	T	Vps51; Tm7sf2	vacuolar protein sorting 51 homolog (S. cerevisiae); transmembrane 7 superfamily member 2	Multiple_Complex	-25.86	2.26e-06	0.0002
TC1000001282.mm.1	18.87	T	E2f7	E2F transcription factor 7	Multiple_Complex	-25.84	1.04e-05	0.0006
TC0400003369.mm.1	-1.57	T	Rnf220	ring finger protein 220	Multiple_Complex	-25.84	2.8e-05	0.0013
TC0800002819.mm.1	1.1	T	Fhod1	formin homology 2 domain containing 1	Multiple_Complex	-25.78	2e-06	0.0002
TC1200002405.mm.1	-6.5	T			NonCoding	-25.72	4.03e-05	0.0017	Cassette Exon	0.37
TC1000001044.mm.1	-26.92	T	Timp3	tissue inhibitor of metalloproteinase 3	Multiple_Complex	-25.66	9.93e-06	0.0006
TC0X00002631.mm.1	23.04	T	Pola1	polymerase (DNA directed), alpha 1	Multiple_Complex	-25.63	8.07e-06	0.0005
TC1100002065.mm.1	-2.46	T	Fn3k	fructosamine 3 kinase	Multiple_Complex	-25.63	1.82e-10	1.4e-07	Cassette Exon	0.36
TC0200005462.mm.1	-12.14	T	Entpd2	ectonucleoside triphosphate diphosphohydrolase 2	Multiple_Complex	-25.56	3.53e-10	2.24e-07	Cassette Exon	0.23
TC1100004303.mm.1	-2.72	T	Sirt7; Mir6936	sirtuin 7; microRNA 6936	Multiple_Complex	-25.47	1.26e-06	0.0001	Alternative 5' Donor Site	0.26
TC0100003216.mm.1	-1.68	T			NonCoding	-25.47	1.24e-08	3.31e-06
TC1200001758.mm.1	9.54	T	Baz1a	bromodomain adjacent to zinc finger domain 1A	Multiple_Complex	-25.45	3.89e-06	0.0003
TC0400001035.mm.1	-5.55	T	Dnajc6	DnaJ (Hsp40) homolog, subfamily C, member 6	Multiple_Complex	-25.44	0.0028	0.0397
TC1200002406.mm.1	-2.47	T	Gm266	predicted gene 266	Coding	-25.43	0.0057	0.066	Alternative 5' Donor Site	0.2
TC0700002780.mm.1	-805.69	T	Mag	myelin-associated glycoprotein	Coding	-25.38	8.21e-05	0.0029
TC1100001802.mm.1	1.49	T	Helz	helicase with zinc finger domain	Multiple_Complex	-25.33	1.16e-09	5.55e-07
TC1100000566.mm.1	-1.1	T	Col23a1	collagen, type XXIII, alpha 1	Multiple_Complex	-25.32	0.0476	0.2624
TC1800000327.mm.1	-4.16	T	Cystm1	cysteine-rich transmembrane module containing 1	Multiple_Complex	-25.32	3.35e-07	4.17e-05
TC0500003112.mm.1	-1.63	T	Ccdc60	coiled-coil domain containing 60	Coding	-25.26	0.0017	0.0278
TC0900003038.mm.1	1.87	T	Gnai2	guanine nucleotide binding protein (G protein), alpha inhibiting 2	Coding	-25.24	1.23e-10	1.06e-07
TC1100000617.mm.1	-1.64	T	P4ha2	procollagen-proline, 2-oxoglutarate 4-dioxygenase (proline 4-hydroxylase), alpha II polypeptide	Multiple_Complex	-25.23	2.24e-09	9e-07
TC0100001028.mm.1	1.06	T	Serpinb11	serine (or cysteine) peptidase inhibitor, clade B (ovalbumin), member 11	Coding	-25.21	0.0005	0.0112
TC0X00001787.mm.1	2.03	T	Hdac6	histone deacetylase 6	Multiple_Complex	-25.19	3.31e-05	0.0015
TC0X00003398.mm.1	1.01	T	Tsix	X (inactive)-specific transcript, opposite strand; X (inactive)-specific transcript, antisense	NonCoding	-25.16	0.0004	0.0099
TC0200001523.mm.1	-6.85	T	Pamr1	peptidase domain containing associated with muscle regeneration 1	Multiple_Complex	-25.16	1.57e-05	0.0008
TC0400000506.mm.1	14.56	T	Anp32b	acidic (leucine-rich) nuclear phosphoprotein 32 family, member B	Multiple_Complex	-24.92	5.51e-05	0.0022
TC0700002426.mm.1	17.28	T	Sae1	SUMO1 activating enzyme subunit 1; SUMO1 activating enzyme subunit 1 (Sae1), mRNA.	Coding	-24.9	0.0005	0.011
TC0200004437.mm.1	-1.59	T	Exd1	exonuclease 3-5 domain containing 1; exonuclease 3'-5' domain containing 1	Coding	-24.86	3.04e-05	0.0014
TC0600001953.mm.1	-93.67	T	Gpr37	G protein-coupled receptor 37	Coding	-24.86	1.63e-06	0.0001
TC1600000368.mm.1	-1.48	T	Trp63	transformation related protein 63	Multiple_Complex	-24.82	6.47e-09	2.01e-06	Cassette Exon	0.27
TC1900001490.mm.1	22.97	T	Aldh18a1	aldehyde dehydrogenase 18 family, member A1	Multiple_Complex	-24.78	0.0001	0.0043
TC1100001448.mm.1	-1.4	T	Col1a1	collagen, type I, alpha 1	Multiple_Complex	-24.74	3.36e-09	1.22e-06
TC0100001466.mm.1	1.47	T	Ankrd45	ankyrin repeat domain 45	Multiple_Complex	-24.73	0.0077	0.0814
TC1100000730.mm.1	1.14	T	Mprip	myosin phosphatase Rho interacting protein	Multiple_Complex	-24.73	1.01e-05	0.0006	Cassette Exon	0.29
TC1700000702.mm.1	22.22	T	Gm19645	PREDICTED: predicted gene, 19645 (Gm19645), miscRNA.	NonCoding	-24.71	2.77e-06	0.0002
TC0800002558.mm.1	-5.01	T	Adgre5; Mir1668	adhesion G protein-coupled receptor E5; microRNA 1668	Multiple_Complex	-24.7	0.0003	0.0078
TC0X00000935.mm.1	1.03	T			NonCoding	-24.7	0.0007	0.0151
TC1900001710.mm.1	-2.34	T	Afap1l2	actin filament associated protein 1-like 2	Multiple_Complex	-24.63	0.0392	0.2332
TC1200002079.mm.1	-2.13	T	Abcd4	ATP-binding cassette, sub-family D (ALD), member 4	Multiple_Complex	-24.58	0.0011	0.02
TC0200000897.mm.1	-2.07	T	Tanc1	tetratricopeptide repeat, ankyrin repeat and coiled-coil containing 1	Multiple_Complex	-24.58	0.0006	0.0128
TC0500003472.mm.1	32.95	T	Mcm7; Mir93; Mir25	minichromosome maintenance deficient 7 (S. cerevisiae); microRNA 93; microRNA 25	Multiple_Complex	-24.53	0.0002	0.005
TC1500002156.mm.1	-11.16	T	Rapgef3	Rap guanine nucleotide exchange factor (GEF) 3	Multiple_Complex	-24.53	1.86e-06	0.0002	Cassette Exon	0.23
TC1100001535.mm.1	-1.01	T	Mrpl45	mitochondrial ribosomal protein L45	Coding	-24.52	1.63e-07	2.41e-05	Alternative 5' Donor Site	0.37
TC0300001096.mm.1	1.06	T	Tmigd3; Adora3	transmembrane and immunoglobulin domain containing 3; adenosine A3 receptor	Multiple_Complex	-24.49	4.55e-11	5.18e-08
TC0800000543.mm.1	-24.86	T	Enpp6	ectonucleotide pyrophosphatase/phosphodiesterase 6	Multiple_Complex	-24.48	9.84e-06	0.0006
TC0700001581.mm.1	-23	T	Ppfibp2	PTPRF interacting protein, binding protein 2 (liprin beta 2)	Coding	-24.48	1.23e-05	0.0007	Cassette Exon	0.31
TC1100001564.mm.1	-3.5	T	Ppp1r1b	protein phosphatase 1, regulatory (inhibitor) subunit 1B	Multiple_Complex	-24.46	2.83e-12	7.72e-09
TC1000002364.mm.1	-2.32	T			NonCoding	-24.42	3.13e-09	1.16e-06	Cassette Exon	0.21
TC0X00000961.mm.1	-9.11	T	Gdpd2	glycerophosphodiester phosphodiesterase domain containing 2	Multiple_Complex	-24.41	1.87e-07	2.68e-05	Cassette Exon	0.32
TC0X00003301.mm.1	-1.79	T	Reps2	RALBP1 associated Eps domain containing protein 2	Multiple_Complex	-24.37	0.0001	0.0044
TC0100003500.mm.1	42.78	T	Nuf2	NUF2, NDC80 kinetochore complex component, homolog (S. cerevisiae)	Multiple_Complex	-24.35	6.6e-05	0.0025	Alternative 5' Donor Site	0.26
TC1800000528.mm.1	21.14	T	Sncaip	synuclein, alpha interacting protein (synphilin)	Multiple_Complex	-24.34	4.32e-06	0.0003
TC1000000711.mm.1	-1.83	T	Adora2a	adenosine A2a receptor	Coding	-24.31	1.49e-05	0.0008
TC0900001100.mm.1	-1.49	T	Gm2109	predicted gene 2109; predicted gene 2109 (Gm2109), non-coding RNA.	NonCoding	-24.3	6.54e-11	6.75e-08	Cassette Exon	0.25
TC1600001380.mm.1	-1.2	T	Dgkg	diacylglycerol kinase, gamma	Multiple_Complex	-24.27	0.0019	0.031
TC0200001819.mm.1	7.96	T	Wdr76	WD repeat domain 76	Multiple_Complex	-24.23	0.0247	0.1753
TC0900000667.mm.1	2.42	T	Psma4	proteasome (prosome, macropain) subunit, alpha type 4	Multiple_Complex	-24.21	0.0022	0.0339
TC0900001347.mm.1	3.97	T	Rpl29	ribosomal protein L29; ribosomal protein L29, mRNA (cDNA clone MGC:6127 IMAGE:3590425), complete cds.; ribosomal protein L29, mRNA (cDNA clone MGC:103210 IMAGE:6487045), complete cds.; ribosomal protein L29, mRNA (cDNA clone MGC:102595 IMAGE:5006561), complete cds.; ribosomal protein L29, mRNA (cDNA clone MGC:106844 IMAGE:1430129), complete cds.	Coding	-24.19	2.79e-07	3.62e-05
TC1100003144.mm.1	-1.4	T	Smtnl2	smoothelin-like 2	Multiple_Complex	-24.17	1.83e-05	0.0009
TC0200004366.mm.1	28.64	T	Arhgap11a	Rho GTPase activating protein 11A	Multiple_Complex	-24.13	9.14e-07	9.16e-05	Intron Retention	0.36
TC0X00000075.mm.1	-3.03	T	Slc35a2	solute carrier family 35 (UDP-galactose transporter), member A2	Multiple_Complex	-24.1	1.91e-06	0.0002
TC0X00001873.mm.1	1.58	T	Cask	calcium/calmodulin-dependent serine protein kinase (MAGUK family); Synthetic construct Mus musculus clone IMAGE:100063272, MGC:191048 calcium/calmodulin-dependent serine protein kinase (MAGUK family) (Cask) mRNA, encodes complete protein.; calcium/calmodulin-dependent serine protein kinase (MAGUK family) (Cask), mRNA.	Multiple_Complex	-24.1	2.09e-05	0.001
TC0100002335.mm.1	-2.43	T	Dnah7a	dynein, axonemal, heavy chain 7A	Multiple_Complex	-24.08	0.0002	0.0051
TC0800000923.mm.1	-1.76	T	Clgn	calmegin	Multiple_Complex	-23.99	0.005	0.0604
TC0600001828.mm.1	46.15	T			NonCoding	-23.99	0.0005	0.0116
TC0100002950.mm.1	2.52	T	Epb41l5	erythrocyte membrane protein band 4.1 like 5	Multiple_Complex	-23.96	1.41e-05	0.0008
TC1000001074.mm.1	3.14	T	Nup37	nucleoporin 37	Multiple_Complex	-23.91	0.0005	0.011
TC0600002269.mm.1	-15.44	T	Skap2	src family associated phosphoprotein 2	Coding	-23.91	0.0016	0.0266
TC0200004713.mm.1	41.78	T	Jag1	jagged 1	Multiple_Complex	-23.91	0.0089	0.0895
TC0200002530.mm.1	1.46	T	Dnttip1	deoxynucleotidyltransferase, terminal, interacting protein 1	Multiple_Complex	-23.86	7.29e-05	0.0027	Cassette Exon	0.27
TC0400003738.mm.1	-1.43	T	Extl1	exostoses (multiple)-like 1	Multiple_Complex	-23.81	1.32e-12	4.87e-09	Cassette Exon	0.36
TC0200001023.mm.1	1.03	T	Gad1	glutamate decarboxylase 1	Multiple_Complex	-23.77	0.0136	0.1191
TC1200002002.mm.1	23.6	T	Erh	enhancer of rudimentary homolog (Drosophila)	Coding	-23.75	0.0234	0.1694
TC0400000183.mm.1	-5.33	T	Pnisr	PNN interacting serine/arginine-rich	Multiple_Complex	-23.75	0.0003	0.0072	Alternative 3' Acceptor Site	0.3
TC0500001344.mm.1	-1.84	T	Rasal1	RAS protein activator like 1 (GAP1 like); RAS protein activator like 1 (GAP1 like) (Rasal1), mRNA.	Multiple_Complex	-23.74	0.0001	0.0035
TC0100000608.mm.1	1.27	T	Smarcal1	SWI/SNF related matrix associated, actin dependent regulator of chromatin, subfamily a-like 1	Multiple_Complex	-23.7	6.28e-06	0.0004	Cassette Exon	0.44
TC0900001576.mm.1	-2.28	T	Acaa1a	acetyl-Coenzyme A acyltransferase 1A	Multiple_Complex	-23.63	1.2e-05	0.0007	Alternative 3' Acceptor Site	0.32
TC0400003760.mm.1	1.39	T	Srrm1	serine/arginine repetitive matrix 1	Multiple_Complex	-23.61	6.18e-06	0.0004
TC0400003887.mm.1	-4.31	T	Slc25a34	solute carrier family 25, member 34	Coding	-23.58	4.52e-13	2.48e-09	Cassette Exon	0.22
TC1200000769.mm.1	16.79	T	Sipa1l1	signal-induced proliferation-associated 1 like 1	Multiple_Complex	-23.54	3.27e-05	0.0015
TC0300000871.mm.1	19.55	T	Celf3	CUGBP, Elav-like family member 3; CUGBP, Elav-like family member 3 (Celf3), mRNA.	Multiple_Complex	-23.53	0.0002	0.0054
TC0400001770.mm.1	-23.93	T	Padi2	peptidyl arginine deiminase, type II	Multiple_Complex	-23.51	7.48e-05	0.0027
TC0700004291.mm.1	-2.35	T	Sult1a1	sulfotransferase family 1A, phenol-preferring, member 1	Coding	-23.51	1.92e-08	4.61e-06	Cassette Exon	0.28
TC1300001928.mm.1	20.68	T	Dek	DEK oncogene (DNA binding)	Multiple_Complex	-23.48	0.0001	0.0045
TC0X00001142.mm.1	-20.72	T	Klhl4	kelch-like 4	Coding	-23.47	2.84e-05	0.0013
TC1500002141.mm.1	23.97	T	Slc38a1	solute carrier family 38, member 1	Multiple_Complex	-23.44	2.74e-12	7.63e-09
TC0700002120.mm.1	-1.02	T	AU018091	expressed sequence AU018091	Coding	-23.41	4.55e-05	0.0019
TC0200002476.mm.1	-1.68	T	Sgk2	serum/glucocorticoid regulated kinase 2	Multiple_Complex	-23.4	1.75e-09	7.49e-07	Alternative 5' Donor Site	0.28
TC1500001480.mm.1	-4.51	T	Csmd3	CUB and Sushi multiple domains 3	Multiple_Complex	-23.38	0.0137	0.1195
TC0100003294.mm.1	-1.29	T	Cacna1e	calcium channel, voltage-dependent, R type, alpha 1E subunit	Multiple_Complex	-23.37	0.0349	0.2171
TC0900002478.mm.1	1.06	T	Iqch	IQ motif containing H	Multiple_Complex	-23.36	2.32e-05	0.0011
TC0700004296.mm.1	-3.5	T	Aldoa	aldolase A, fructose-bisphosphate	Multiple_Complex	-23.36	1.29e-06	0.0001
TC1100003286.mm.1	-1.85	T	Nek8	NIMA (never in mitosis gene a)-related expressed kinase 8	Multiple_Complex	-23.34	0.0038	0.0498
TC0100000658.mm.1	-1.97	T	Speg	SPEG complex locus	Multiple_Complex	-23.3	0.0071	0.0769
TC0600003474.mm.1	17.16	T	Fam60a	family with sequence similarity 60, member A	Multiple_Complex	-23.27	1.28e-10	1.08e-07
TC0400003208.mm.1	-13.66	T	Acot11	acyl-CoA thioesterase 11	Multiple_Complex	-23.26	1.56e-05	0.0008	Cassette Exon	0.28
TC1600000860.mm.1	-1.15	T			NonCoding	-23.25	1.46e-07	2.22e-05
TC1800001744.mm.1	-6.68	T	Arhgap26	Rho GTPase activating protein 26	Multiple_Complex	-23.22	0.0013	0.023
TC0100001388.mm.1	-1.5	T	A930039A15Rik	RIKEN cDNA A930039A15 gene	Coding	-23.22	1.41e-08	3.64e-06
TC1700000603.mm.1	1.74	T	Wdr46	WD repeat domain 46	Multiple_Complex	-23.21	1.41e-09	6.38e-07
TC0100001736.mm.1	-1.03	T	Dnah14	dynein, axonemal, heavy chain 14	Multiple_Complex	-23.2	0.0002	0.0065
TC1700002173.mm.1	-2.59	T	Abcc10	ATP-binding cassette, sub-family C (CFTR/MRP), member 10	Multiple_Complex	-23.17	0.0108	0.1021
TC0100000642.mm.1	-8.91	T	Cyp27a1	cytochrome P450, family 27, subfamily a, polypeptide 1	Coding	-23.17	2.31e-07	3.15e-05
TC0400000464.mm.1	22.11	T	Melk	maternal embryonic leucine zipper kinase	Multiple_Complex	-23.1	0.003	0.0422
TC0100000230.mm.1	-13.75	T	Arhgef4; C230030N03Rik	Rho guanine nucleotide exchange factor (GEF) 4; RIKEN cDNA C230030N03 gene	Multiple_Complex	-23.09	9.27e-06	0.0005	Cassette Exon	0.22
TC1600000959.mm.1	-1.29	T	2810407A14Rik	RIKEN cDNA 2810407A14 gene	Multiple_Complex	-23.05	2.48e-05	0.0012
TC0700003608.mm.1	-5.84	T	Cpeb1	cytoplasmic polyadenylation element binding protein 1	Multiple_Complex	-23.01	2.03e-06	0.0002	Cassette Exon	0.23
TC1100001586.mm.1	26.66	T	Cdc6	cell division cycle 6	Multiple_Complex	-22.99	0.0002	0.0048
TC1100000786.mm.1	-1	T	Fam83g	family with sequence similarity 83, member G	Multiple_Complex	-22.97	6.83e-06	0.0004
TC0800002254.mm.1	15.33	T	LOC100862010	PREDICTED: uncharacterized LOC100862010 (LOC100862010), miscRNA.	NonCoding	-22.93	0.001	0.0189
TC1200001306.mm.1	28.33	T	Ncapg2	non-SMC condensin II complex, subunit G2	Multiple_Complex	-22.92	0.0011	0.0205
TC1800001743.mm.1	-1.75	T	Gm5820; Arhgap26	predicted gene 5820; Rho GTPase activating protein 26; predicted gene 5820 (Gm5820), mRNA.	Multiple_Complex	-22.91	1.01e-07	1.67e-05
TC1000002671.mm.1	14.64	T	Tmpo	thymopoietin; thymopoietin (Tmpo), transcript variant 3, mRNA.; thymopoietin (Tmpo), transcript variant 6, mRNA.; thymopoietin (Tmpo), transcript variant 1, mRNA.	Multiple_Complex	-22.88	4.74e-07	5.48e-05
TC1500000002.mm.1	-34.32	T	Sepp1	selenoprotein P, plasma, 1	Multiple_Complex	-22.84	9.38e-06	0.0006
TC0200001918.mm.1	1.23	T	Mrps5	mitochondrial ribosomal protein S5	Multiple_Complex	-22.79	6.48e-06	0.0004	Alternative 5' Donor Site	0.37
TC1100000916.mm.1	16.31	T	Trp53	transformation related protein 53	Multiple_Complex	-22.74	3.18e-09	1.17e-06	Cassette Exon	0.32
TC0X00000150.mm.1	1.01	T			NonCoding	-22.71	3.99e-06	0.0003
TC0200000019.mm.1	-2.28	T	Frmd4a	FERM domain containing 4A	Multiple_Complex	-22.71	9.19e-06	0.0005
TC0800000286.mm.1	-2.71	T	Plat	plasminogen activator, tissue	Coding	-22.66	0.0002	0.006
TC0400001286.mm.1	-1.31	T	Tmem53	transmembrane protein 53	Multiple_Complex	-22.66	9.48e-07	9.42e-05	Cassette Exon	0.21
TC1100002986.mm.1	1.27	T			NonCoding	-22.6	3.39e-07	4.21e-05
TC1100003141.mm.1	-18.83	T	Slc13a5	solute carrier family 13 (sodium-dependent citrate transporter), member 5; Synthetic construct Mus musculus clone IMAGE:100062711, MGC:190938 solute carrier family 13 (sodium-dependent citrate transporter), member 5 (Slc13a5) mRNA, encodes complete protein.	Coding	-22.55	0.0013	0.0237
TC0300003246.mm.1	-2.65	T	Gstm3	glutathione S-transferase, mu 3	Coding	-22.54	5.14e-05	0.002
TC1900001590.mm.1	-1.49	T	Kcnip2	Kv channel-interacting protein 2	Multiple_Complex	-22.54	0.0024	0.0358
TC0X00002853.mm.1	7.78	T	Hmgn5	high-mobility group nucleosome binding domain 5	Coding	-22.54	7.34e-06	0.0005
TC1900000052.mm.1	1.13	T	Brms1; B4gat1	breast cancer metastasis-suppressor 1; beta-1,4-glucuronyltransferase 1	Multiple_Complex	-22.51	8.86e-08	1.5e-05	Alternative 3' Acceptor Site	0.39
TC1000000122.mm.1	30.56	T	Cited2	Cbp/p300-interacting transactivator, with Glu/Asp-rich carboxy-terminal domain, 2	Coding	-22.47	2.18e-06	0.0002	Alternative 5' Donor Site	0.33
TC1900000081.mm.1	1.18	T	Gm16538; RP24-179M18.3	predicted gene 16538 [Source:MGI Symbol;Acc:MGI:4414958]; novel transcript	NonCoding	-22.44	4.26e-09	1.47e-06
TC1700002597.mm.1	-1.39	T	Slc8a1	solute carrier family 8 (sodium/calcium exchanger), member 1; solute carrier family 8 (sodium/calcium exchanger), member 1 (Slc8a1), transcript variant B, mRNA.	Multiple_Complex	-22.41	0.0002	0.0051
TC0500003637.mm.1	15.75	T	Slc7a1	solute carrier family 7 (cationic amino acid transporter, y+ system), member 1	Multiple_Complex	-22.38	2.91e-07	3.74e-05
TC0400000085.mm.1	22.9	T	Ccne2	cyclin E2	Multiple_Complex	-22.38	0.0032	0.044	Cassette Exon	0.21
TC0700001192.mm.1	61.23	T	Mex3b	mex3 homolog B (C. elegans)	Multiple_Complex	-22.33	1.1e-06	0.0001	Cassette Exon	0.2
TC0700001431.mm.1	-3.2	T	Arap1	ArfGAP with RhoGAP domain, ankyrin repeat and PH domain 1	Multiple_Complex	-22.32	0.0008	0.0165
TC1900000560.mm.1	31.12	T	Hells	helicase, lymphoid specific	Multiple_Complex	-22.28	9.42e-07	9.38e-05	Alternative 3' Acceptor Site	0.23
TC0200003656.mm.1	-3.65	T	Cobll1	Cobl-like 1	Multiple_Complex	-22.26	0.0006	0.0134
TC0100000426.mm.1	11.81	T	Sgol2a	shugoshin-like 2a (S. pombe)	Multiple_Complex	-22.25	3.67e-05	0.0016
TC0X00001413.mm.1	21.32	T	Pak3	p21 protein (Cdc42/Rac)-activated kinase 3	Multiple_Complex	-22.22	0.0002	0.005
TC1500000014.mm.1	-1.04	T	C6	complement component 6	Multiple_Complex	-22.21	8.77e-08	1.49e-05
TC1700000663.mm.1	11.4	T	Ddah2	dimethylarginine dimethylaminohydrolase 2	Multiple_Complex	-22.17	3.84e-08	7.83e-06
TC1700001458.mm.1	-4.97	T	Acat3	acetyl-Coenzyme A acetyltransferase 3	Multiple_Complex	-22.14	6.58e-08	1.19e-05	Alternative 5' Donor Site	0.22
TC0200003753.mm.1	-11.79	T	Gpr155	G protein-coupled receptor 155; G protein-coupled receptor 155 (Gpr155), transcript variant 2, mRNA.	Multiple_Complex	-22.13	1.57e-05	0.0008	Alternative 5' Donor Site	0.22
TC1500000660.mm.1	1.7	T	Triobp	TRIO and F-actin binding protein	Multiple_Complex	-22.12	6.35e-11	6.6e-08
TC1900001685.mm.1	1.07	T			NonCoding	-22.09	3.84e-05	0.0016
TC1500001657.mm.1	-463.17	T	Ndrg1	N-myc downstream regulated gene 1	Multiple_Complex	-22.07	5.25e-05	0.0021
TC1100001147.mm.1	-7.52	T	Tlcd1; Mir7653	TLC domain containing 1; microRNA 7653	Multiple_Complex	-22.07	0.0005	0.0112
TC1000001228.mm.1	-2.24	T	Mgat4c	MGAT4 family, member C; mannosyl (alpha-1,3-)-glycoprotein beta-1,4-N-acetylglucosaminyltransferase, isozyme C (putative)	Multiple_Complex	-22.05	1.6e-06	0.0001
TC1100001161.mm.1	-3.03	T	Slc46a1	solute carrier family 46, member 1	Multiple_Complex	-22	1.35e-07	2.08e-05	Cassette Exon	0.29
TC0200000395.mm.1	-7.72	T	Nsmf	NMDA receptor synaptonuclear signaling and neuronal migration factor	Multiple_Complex	-21.96	4.95e-06	0.0003	Alternative 5' Donor Site	0.2
TC1400000158.mm.1	-9.66	T	Nid2	nidogen 2	Coding	-21.96	2.78e-05	0.0013
TC0X00003249.mm.1	5.06	T	Sms	spermine synthase	Multiple_Complex	-21.93	7.43e-10	3.94e-07
TC0100000927.mm.1	-10.32	T	Sned1; Mir6901	sushi, nidogen and EGF-like domains 1; microRNA 6901; sushi, nidogen and EGF-like domains 1 (Sned1), mRNA.	Multiple_Complex	-21.91	1.97e-05	0.001
TC0100003709.mm.1	-2.57	T	Degs1	degenerative spermatocyte homolog 1 (Drosophila)	Multiple_Complex	-21.91	5.09e-08	9.74e-06	Mutually Exclusive Exons	0.21
TC1200001110.mm.1	3.78	T	Evl	Ena-vasodilator stimulated phosphoprotein	Multiple_Complex	-21.88	0.0002	0.0064
TC1300000980.mm.1	-1.38	T	2810049E08Rik	RIKEN cDNA 2810049E08 gene; RIKEN cDNA 2810049E08 gene (2810049E08Rik), non-coding RNA.	NonCoding	-21.81	0.0002	0.0061
TC0700002445.mm.1	-3.23	T	Hif3a	hypoxia inducible factor 3, alpha subunit	Multiple_Complex	-21.8	2.65e-11	3.63e-08	Alternative 5' Donor Site	0.27
TC0600003136.mm.1	33.01	T	Ncapd2	non-SMC condensin I complex, subunit D2	Coding	-21.76	0.0005	0.0117
TC0800002113.mm.1	-2.7	T	Mtus1	mitochondrial tumor suppressor 1	Multiple_Complex	-21.66	4.21e-06	0.0003
TC1800000179.mm.1	-15.73	T	Dtna	dystrobrevin alpha; dystrobrevin alpha (Dtna), transcript variant 1, mRNA.	Multiple_Complex	-21.66	0.0056	0.0653
TC0800000854.mm.1	-7.06	T	Nr3c2	nuclear receptor subfamily 3, group C, member 2	Multiple_Complex	-21.61	0.0003	0.0073
TC1600001092.mm.1	-1.33	T	Mx2	MX dynamin-like GTPase 2; myxovirus (influenza virus) resistance 2	Multiple_Complex	-21.61	1.47e-05	0.0008
TC0200001551.mm.1	-1.76	T	Cd59b	CD59b antigen	Coding	-21.57	0.0003	0.0071
TC1100002397.mm.1	-1.03	T	Vrk2	vaccinia related kinase 2	Multiple_Complex	-21.56	5.35e-08	1.01e-05
TC0200004250.mm.1	9.38	T	Qser1	glutamine and serine rich 1	Multiple_Complex	-21.53	0.0001	0.0044
TC1700001132.mm.1	1.55	T	Lpin2	lipin 2	Multiple_Complex	-21.53	1.15e-06	0.0001
TC1200001072.mm.1	3.36	T	Papola	poly (A) polymerase alpha; Synthetic construct Mus musculus clone IMAGE:100062187, MGC:190402 poly (A) polymerase alpha (Papola) mRNA, encodes complete protein.	Multiple_Complex	-21.49	0.0002	0.0049
TC0600001596.mm.1	15.76	T	1190002F15Rik	RIKEN cDNA 1190002F15 gene; RIKEN cDNA 1190002F15 gene (1190002F15Rik), transcript variant 2, non-coding RNA.; RIKEN cDNA 1190002F15 gene (1190002F15Rik), transcript variant 1, non-coding RNA.	NonCoding	-21.47	4.28e-05	0.0018
TC0200005385.mm.1	-5.51	T	Sycp2	synaptonemal complex protein 2; Synthetic construct Mus musculus clone IMAGE:100069462, MGC:199364 synaptonemal complex protein 2 (Sycp2) mRNA, encodes complete protein.	Multiple_Complex	-21.45	0.0001	0.0036
TC1500000165.mm.1	-2.79	T	Fam134b	family with sequence similarity 134, member B; family with sequence similarity 134, member B (Fam134b), transcript variant 1, mRNA.	Coding	-21.31	0.0003	0.0079
TC1800000052.mm.1	1.73	T	Wac	WW domain containing adaptor with coiled-coil	Multiple_Complex	-21.31	0.0013	0.0234	Alternative 5' Donor Site	0.28
TC0600001830.mm.1	30.21	T	Dlx6os1	distal-less homeobox 6, opposite strand 1; Dlx6 opposite strand transcript 1	NonCoding	-21.29	0.0034	0.0459
TC0200002040.mm.1	-1.34	T	1110034G24Rik	RIKEN cDNA 1110034G24 gene	Multiple_Complex	-21.27	0.0004	0.0095
TC1900000134.mm.1	22.42	T	Rcor2	REST corepressor 2	Multiple_Complex	-21.27	5e-06	0.0003	Alternative 5' Donor Site	0.24
TC1200001834.mm.1	82.08	T	Mis18bp1	MIS18 binding protein 1	Multiple_Complex	-21.2	0.0001	0.0039	Intron Retention	0.37
TC0600001254.mm.1	18.44	T	Fancd2	Fanconi anemia, complementation group D2	Multiple_Complex	-21.2	0.0079	0.0829
TC1000002689.mm.1	1.17	T	Cfap54	cilia and flagella associated protein 54	Multiple_Complex	-21.18	2.05e-05	0.001
TC0300000419.mm.1	-4.91	T	Dclk1	doublecortin-like kinase 1	Multiple_Complex	-21.15	6.36e-05	0.0024
TC1600000765.mm.1	-2.85	T	Cldnd1	claudin domain containing 1	Multiple_Complex	-21.13	3.17e-05	0.0014
TC0400001465.mm.1	20.63	T	Clspn	claspin	Multiple_Complex	-21.13	1.06e-05	0.0006	Alternative 3' Acceptor Site	0.26
TC0700001959.mm.1	-1.52	T	Ptpre	protein tyrosine phosphatase, receptor type, E; Synthetic construct Mus musculus clone IMAGE:100064089, MGC:193460 protein tyrosine phosphatase, receptor type, E (Ptpre) mRNA, encodes complete protein.	Multiple_Complex	-21.12	2.08e-06	0.0002
TC0600002626.mm.1	-6.75	T	Cml1	camello-like 1	Multiple_Complex	-21.05	1.33e-08	3.49e-06	Alternative 5' Donor Site	0.23
TC0700003526.mm.1	-1.06	T	Sv2b	synaptic vesicle glycoprotein 2 b	Coding	-21.04	0.0016	0.0265
TC0600001171.mm.1	-2.57	T	Chl1	cell adhesion molecule with homology to L1CAM	Multiple_Complex	-21.01	9.23e-09	2.65e-06
TC0500001512.mm.1	5.16	T	Cct6a; Snora15	chaperonin containing Tcp1, subunit 6a (zeta); small nucleolar RNA, H/ACA box 15; chaperonin containing Tcp1, subunit 6a (zeta) (Cct6a), mRNA.	Multiple_Complex	-21	0.0001	0.0046
TC1100003034.mm.1	-1.15	T	Gucy2e	guanylate cyclase 2e	Multiple_Complex	-20.97	0.0031	0.0433
TC1900001081.mm.1	-8.33	T	Asrgl1	asparaginase like 1	Multiple_Complex	-20.95	1.79e-06	0.0002	Alternative 5' Donor Site	0.23
TC0300000712.mm.1	-12.09	T	Gm19439	PREDICTED: predicted gene, 19439 (Gm19439), miscRNA.	NonCoding	-20.94	7.58e-11	7.48e-08
TC0700004093.mm.1	1.08	T			NonCoding	-20.85	1.89e-07	2.7e-05
TC0200001345.mm.1	-1.12	T	Gm13768	predicted gene 13768 [Source:MGI Symbol;Acc:MGI:3651239]	Pseudogene	-20.82	8.19e-08	1.41e-05
TC0200005155.mm.1	-1.34	T	Zmynd8	zinc finger, MYND-type containing 8; zinc finger, MYND-type containing 8 (Zmynd8), transcript variant 1, mRNA.	Multiple_Complex	-20.77	9.26e-07	9.25e-05	Cassette Exon	0.34
TC1300002520.mm.1	12.21	T	Map1b	microtubule-associated protein 1B	Multiple_Complex	-20.76	0.0015	0.0255
TC0100003382.mm.1	-18.97	T	Dnm3	dynamin 3	Multiple_Complex	-20.74	0.0008	0.0168
TC0100000356.mm.1	-2.63	T	Dnah7c	dynein, axonemal, heavy chain 7C	Coding	-20.73	0.001	0.019
TC1100004122.mm.1	-1.01	T	Rhbdf2	rhomboid 5 homolog 2 (Drosophila)	Multiple_Complex	-20.7	7.67e-06	0.0005
TC1200001047.mm.1	-4.19	T	Serpina3n	serine (or cysteine) peptidase inhibitor, clade A, member 3N	Coding	-20.7	4.17e-07	4.96e-05
TC1200001030.mm.1	-5.53	T	Ifi27	interferon, alpha-inducible protein 27	Multiple_Complex	-20.57	6.01e-06	0.0004	Mutually Exclusive Exons	0.26
TC0700002262.mm.1	-1.26	T	Vmn2r45	vomeronasal 2, receptor 45	Coding	-20.56	0.0117	0.1076
TC1100001756.mm.1	-1.67	T	Tanc2	tetratricopeptide repeat, ankyrin repeat and coiled-coil containing 2	Multiple_Complex	-20.55	2.09e-06	0.0002
TC0800000036.mm.1	1.16	T	Cers4	ceramide synthase 4	Multiple_Complex	-20.55	4.14e-05	0.0017
TC1000001679.mm.1	-19.02	T	Syne1	spectrin repeat containing, nuclear envelope 1	Multiple_Complex	-20.51	1.1e-05	0.0006	Cassette Exon	0.31
TC1500002039.mm.1	19.88	T	Mapk11	mitogen-activated protein kinase 11	Coding	-20.47	6.78e-07	7.24e-05	Cassette Exon	0.23
TC0700002239.mm.1	-1.08	T	Vmn2r34; Vmn2r37	vomeronasal 2, receptor 34; Synthetic construct Mus musculus clone IMAGE:100062520, MGC:190904 vomeronasal 2, receptor 37 (Vmn2r37) mRNA, encodes complete protein.	Coding	-20.45	0.0128	0.1144
TC0500003221.mm.1	1.71	T	Kdm2b; Gm2479	lysine (K)-specific demethylase 2B; lysine (K)-specific demethylase 2B (Kdm2b), transcript variant 3, mRNA.; PREDICTED: predicted gene 2479 (Gm2479), miscRNA.	Multiple_Complex	-20.44	4.79e-06	0.0003
TC1000000874.mm.1	-3.22	T	Sppl2b	signal peptide peptidase like 2B	Multiple_Complex	-20.43	0.0069	0.0757
TC0800002724.mm.1	-1.64	T			NonCoding	-20.42	8.28e-07	8.47e-05
TC1500001167.mm.1	-3.87	T	Osmr	oncostatin M receptor	Multiple_Complex	-20.42	0.0048	0.0586
TC1700001856.mm.1	-57.52	T	Cyp4f14	cytochrome P450, family 4, subfamily f, polypeptide 14	Coding	-20.41	5.68e-06	0.0004
TC0800000017.mm.1	-1.59	T	Stxbp2	syntaxin binding protein 2	Multiple_Complex	-20.4	3.3e-05	0.0015	Cassette Exon	0.28
TC1700000706.mm.1	19.13	T	Nrm	nurim (nuclear envelope membrane protein)	Coding	-20.39	0.0004	0.0099
TC1400000179.mm.1	-2.73	T	Adk	adenosine kinase	Multiple_Complex	-20.38	0.0016	0.0274
TC0200000515.mm.1	1.63	T	Odf2	outer dense fiber of sperm tails 2	Multiple_Complex	-20.35	6.46e-07	6.98e-05	Alternative 3' Acceptor Site	0.27
TC0400003210.mm.1	-1.02	T			NonCoding	-20.33	6.09e-06	0.0004
TC1100003863.mm.1	-1.19	T	Plcd3	phospholipase C, delta 3	Multiple_Complex	-20.32	4.31e-07	5.09e-05	Cassette Exon	0.26
TC1200001961.mm.1	-2.43	T			NonCoding	-20.31	3.66e-10	2.31e-07	Cassette Exon	0.21
TC0200004217.mm.1	-2.16	T	Fjx1	four jointed box 1 (Drosophila)	Coding	-20.29	2.18e-08	5.08e-06
TC0300001830.mm.1	-7.62	T	Gm20515; RP24-396D16.1	predicted gene 20515 [Source:MGI Symbol;Acc:MGI:5141980]; Novel transcript	NonCoding	-20.27	0.0002	0.0048	Alternative 5' Donor Site	0.26
TC0900002489.mm.1	8.82	T	Zwilch	zwilch kinetochore protein	Multiple_Complex	-20.26	0.0003	0.0083
TC0800000937.mm.1	25.97	T	Asf1b	anti-silencing function 1B histone chaperone; ASF1 anti-silencing function 1 homolog B (S. cerevisiae)	Multiple_Complex	-20.24	0.0002	0.0062	Alternative 3' Acceptor Site	0.22
TC1900000993.mm.1	33.71	T	Pola2	polymerase (DNA directed), alpha 2	Multiple_Complex	-20.21	7.99e-05	0.0029	Alternative 5' Donor Site	0.25
TC0X00000735.mm.1	14.53	T	Dkc1	dyskeratosis congenita 1, dyskerin	Multiple_Complex	-20.19	0.0003	0.0078
TC0100000980.mm.1	-8.33	T			NonCoding	-20.19	0.002	0.032
TC1900000744.mm.1	-19.73	T	AA387883	expressed sequence AA387883; expressed sequence AA387883 (AA387883), non-coding RNA.	NonCoding	-20.18	2.19e-08	5.1e-06
TC0200002869.mm.1	20.31	T	Mcm10	minichromosome maintenance deficient 10 (S. cerevisiae)	Multiple_Complex	-20.09	0.0014	0.0243
TC1500001958.mm.1	9.45	T	Tcf20	transcription factor 20	Multiple_Complex	-20.08	7.44e-07	7.78e-05
TC0600003314.mm.1	-2.59	T	Hebp1	heme binding protein 1	Coding	-20.07	2.01e-05	0.001
TC1300000432.mm.1	-3.47	T	Rreb1	ras responsive element binding protein 1	Multiple_Complex	-20.04	0.0005	0.012
TC1700001459.mm.1	-1.94	T	Acat2	acetyl-Coenzyme A acetyltransferase 2	Multiple_Complex	-20.02	1.46e-10	1.19e-07
TC0400002469.mm.1	-40.53	T	AI464131	expressed sequence AI464131	Coding	-20.01	1.58e-07	2.35e-05
TC1000002353.mm.1	-1.97	T	Bicc1	bicaudal C homolog 1 (Drosophila)	Multiple_Complex	-19.97	0.0001	0.0046
TC0200001472.mm.1	-14.8	T	Lrrc4c	leucine rich repeat containing 4C	Multiple_Complex	-19.95	0.0012	0.0215
TC1600001081.mm.1	-2.46	T	B3galt5	UDP-Gal:betaGlcNAc beta 1,3-galactosyltransferase, polypeptide 5	Multiple_Complex	-19.93	7.33e-07	7.7e-05
TC0300002778.mm.1	-1.52	T	Amy2b	amylase 2b	Multiple_Complex	-19.93	0.0001	0.0041
TC0900001663.mm.1	1.24	T	Lars2	leucyl-tRNA synthetase, mitochondrial	Multiple_Complex	-19.92	0.0328	0.2087	Alternative 3' Acceptor Site	0.21
TC0800001426.mm.1	-1.04	T	Atp2c2	ATPase, Ca++ transporting, type 2C, member 2	Coding	-19.91	2.68e-06	0.0002
TC1300002564.mm.1	-11.14	T	Mast4	microtubule associated serine/threonine kinase family member 4	Multiple_Complex	-19.9	0.0006	0.0127
TC1500000729.mm.1	3.44	T	Zc3h7b	zinc finger CCCH type containing 7B; Synthetic construct Mus musculus clone IMAGE:100068084, MGC:195701 zinc finger CCCH type containing 7B (Zc3h7b) mRNA, encodes complete protein.	Coding	-19.88	0.0012	0.0216
TC1100000029.mm.1	-2.81	T	Gal3st1	galactose-3-O-sulfotransferase 1	Coding	-19.87	1.35e-05	0.0007
TC0700002284.mm.1	-1.16	T	Vmn2r37	vomeronasal 2, receptor 37; Synthetic construct Mus musculus clone IMAGE:100062520, MGC:190904 vomeronasal 2, receptor 37 (Vmn2r37) mRNA, encodes complete protein.	Coding	-19.84	0.0107	0.1013
TC0800002805.mm.1	-1.03	T	Nae1	NEDD8 activating enzyme E1 subunit 1	Multiple_Complex	-19.84	0.0033	0.0455	Intron Retention	0.23
TC0900000819.mm.1	24.05	T	Tipin	timeless interacting protein	Coding	-19.84	0.0003	0.0071
TC1100001789.mm.1	-1.29	T	1810010H24Rik	RIKEN cDNA 1810010H24 gene	Multiple_Complex	-19.81	0.0001	0.0042
TC0200001045.mm.1	-8.7	T	Itga6	integrin alpha 6; integrin alpha 6 (Itga6), mRNA.	Multiple_Complex	-19.81	0.0044	0.0554
TC0600000103.mm.1	1.35	T	Foxp2	forkhead box P2	Multiple_Complex	-19.79	0.0002	0.0061
TC1300001171.mm.1	15.69	T	Cenpk	centromere protein K; Synthetic construct Mus musculus clone IMAGE:100015025, MGC:180340 centromere protein K (Cenpk) mRNA, encodes complete protein.; centromere protein K (Cenpk), transcript variant 2, mRNA.; centromere protein K (Cenpk), transcript variant 1, mRNA.	Multiple_Complex	-19.78	4.34e-06	0.0003
TC0200004816.mm.1	-1.62	T	Cst3	cystatin C	Multiple_Complex	-19.77	0.0004	0.0092	Alternative 5' Donor Site	0.38
TC1100003470.mm.1	39.26	T	Prr11	proline rich 11	Coding	-19.71	0.0009	0.018
TC0400001137.mm.1	-1.99	T	0610037L13Rik	RIKEN cDNA 0610037L13 gene	Multiple_Complex	-19.68	0.0001	0.0041
TC1500001044.mm.1	1.06	T	Higd1c; Methig1; Mettl7a2	HIG1 domain family, member 1C; methyltransferase hypoxia inducible domain containing 1; methyltransferase like 7A2	Coding	-19.67	4.87e-11	5.42e-08	Alternative 5' Donor Site	0.26
TC0600002858.mm.1	2.75	T	Shq1	SHQ1 homolog (S. cerevisiae)	Multiple_Complex	-19.66	0.0034	0.0465
TC1700002814.mm.1	-48.23	T	C4b	complement component 4B (Chido blood group)	Multiple_Complex	-19.64	0.0007	0.0153
TC0100001862.mm.1	-1.08	T	Gm10516	predicted gene 10516	NonCoding	-19.62	3.32e-07	4.14e-05
TC0X00001382.mm.1	10.98	T	Prps1	phosphoribosyl pyrophosphate synthetase 1	Multiple_Complex	-19.61	0.0036	0.0479	Alternative 5' Donor Site	0.24
TC0500000636.mm.1	-6.59	T	Nsun7	NOL1/NOP2/Sun domain family, member 7	Multiple_Complex	-19.6	0.0036	0.0479
TC1100004092.mm.1	-6.81	T	Caskin2	CASK-interacting protein 2	Multiple_Complex	-19.6	7.2e-07	7.59e-05
TC0900000751.mm.1	1.59	T	Pkm	pyruvate kinase, muscle	Multiple_Complex	-19.59	1.9e-05	0.001	Alternative 3' Acceptor Site	0.22
TC0X00001564.mm.1	1.28	T	2210013O21Rik	RIKEN cDNA 2210013O21 gene	Multiple_Complex	-19.58	0.0014	0.0244	Alternative 5' Donor Site	0.25
TC1500002109.mm.1	-2.46	T	Adamts20	a disintegrin-like and metallopeptidase (reprolysin type) with thrombospondin type 1 motif, 20	Multiple_Complex	-19.56	2.14e-07	2.96e-05	Cassette Exon	0.25
TC0500002254.mm.1	-37.75	T	Sorcs2	sortilin-related VPS10 domain containing receptor 2	Multiple_Complex	-19.46	1e-05	0.0006
TC0900002305.mm.1	5.09	T	Atm	ataxia telangiectasia mutated; ataxia telangiectasia mutated homolog (human)	Multiple_Complex	-19.46	0.007	0.0764	Intron Retention	0.28
TC0X00001170.mm.1	26.24	T	Gm14926	predicted gene 14926 [Source:MGI Symbol;Acc:MGI:3705617]	Pseudogene	-19.45	2.54e-08	5.7e-06	Cassette Exon	0.21
TC0700000563.mm.1	-2.13	T	Nphs1	nephrosis 1, nephrin; Synthetic construct Mus musculus clone IMAGE:100062239, MGC:190426 nephrosis 1 homolog, nephrin (human) (Nphs1) mRNA, encodes complete protein.	Multiple_Complex	-19.44	1.48e-05	0.0008
TC1500002032.mm.1	-3.01	T	Ttll8; Gm20621	tubulin tyrosine ligase-like family, member 8; predicted gene 20621	Multiple_Complex	-19.4	2.42e-07	3.26e-05
TC1300001707.mm.1	4.4	T	2610307P16Rik	RIKEN cDNA 2610307P16 gene	NonCoding	-19.39	4.07e-07	4.85e-05	Alternative 5' Donor Site	0.24
TC1700001828.mm.1	1.1	T			NonCoding	-19.36	0.0002	0.0065
TC0800001143.mm.1	-2.84	T	Ndrg4	N-myc downstream regulated gene 4	Multiple_Complex	-19.34	8.66e-09	2.52e-06	Cassette Exon	0.21
TC0500000298.mm.1	14	T	Cenpa	centromere protein A	Multiple_Complex	-19.33	1.1e-06	0.0001
TC1900000957.mm.1	3.76	T	Sf3b2	splicing factor 3b, subunit 2	Multiple_Complex	-19.31	4.67e-05	0.0019	Alternative 3' Acceptor Site	0.3
TC1000002316.mm.1	-1.43	T	Zfp365	zinc finger protein 365	Multiple_Complex	-19.29	1.79e-05	0.0009
TC1900001323.mm.1	-4.15	T	Glis3	GLIS family zinc finger 3; Synthetic construct Mus musculus clone IMAGE:100068065, MGC:195682 GLIS family zinc finger 3 (Glis3) mRNA, encodes complete protein.	Multiple_Complex	-19.27	1.41e-07	2.16e-05
TC1500000297.mm.1	-43.86	T	Baalc	brain and acute leukemia, cytoplasmic; Synthetic construct Mus musculus clone IMAGE:100063898, MGC:193365 brain and acute leukemia, cytoplasmic (Baalc) mRNA, encodes complete protein.; brain and acute leukemia, cytoplasmic (Baalc), mRNA.	Multiple_Complex	-19.26	4.11e-10	2.52e-07
TC0700002173.mm.1	22.06	T	Ube2s	ubiquitin-conjugating enzyme E2S	Coding	-19.25	2.62e-09	1.02e-06
TC0300002499.mm.1	17.14	T	Hist2h2ac	histone cluster 2, H2ac	Coding	-19.25	3.92e-06	0.0003	Alternative 5' Donor Site	0.23
TC1900000362.mm.1	-38.46	T			NonCoding	-19.23	6.88e-07	7.32e-05
TC0600002265.mm.1	2.3	T	Hnrnpa2b1	heterogeneous nuclear ribonucleoprotein A2/B1; heterogeneous nuclear ribonucleoprotein A2/B1 (Hnrnpa2b1), transcript variant 1, mRNA.	Multiple_Complex	-19.23	0.0084	0.0863
TC1300000972.mm.1	1.57	T	Mef2c	myocyte enhancer factor 2C	Multiple_Complex	-19.22	0.0216	0.161
TC1400001676.mm.1	-2.11	T	Sh3bp5	SH3-domain binding protein 5 (BTK-associated)	Multiple_Complex	-19.19	7.27e-05	0.0027	Cassette Exon	0.22
TC0500003286.mm.1	-1.39	T	Tmem132d	transmembrane protein 132D	Multiple_Complex	-19.18	3.2e-09	1.17e-06	Alternative 5' Donor Site	0.21
TC0800001770.mm.1	-1.73	T	Csmd1	CUB and Sushi multiple domains 1	Multiple_Complex	-19.16	0.0002	0.0051
TC1500000605.mm.1	-4.48	T	Gpt	glutamic pyruvic transaminase, soluble	Multiple_Complex	-19.16	3.61e-09	1.29e-06	Cassette Exon	0.26
TC1900000019.mm.1	-1.53	T	Unc93b1	unc-93 homolog B1 (C. elegans)	Multiple_Complex	-19.13	0.0125	0.1124
TC1800000579.mm.1	-3.7	T	Gm19500	PREDICTED: predicted gene, 19500 (Gm19500), miscRNA.	NonCoding	-19.13	7.66e-10	4.02e-07	Alternative 5' Donor Site	0.21
TC1100001694.mm.1	-1.58	T	Fzd2	frizzled homolog 2 (Drosophila)	Coding	-19.09	5.06e-09	1.67e-06	Alternative 5' Donor Site	0.27
TC1500000733.mm.1	-3.5	T	Csdc2	cold shock domain containing C2, RNA binding	Multiple_Complex	-19.07	3.05e-05	0.0014	Cassette Exon	0.27
TC0800003224.mm.1	1.96	T	Zdhhc2	zinc finger, DHHC domain containing 2	Multiple_Complex	-19.06	0.0001	0.0041
TC0200003643.mm.1	-2.5	T	Fign	fidgetin; fidgetin (Fign), transcript variant 2, mRNA.	Multiple_Complex	-19.04	3.19e-05	0.0014
TC1100000608.mm.1	-2.82	T	2008-09-01	septin 8	Multiple_Complex	-19.03	3.93e-05	0.0017	Cassette Exon	0.4
TC0200000347.mm.1	6.45	T	Gad2	glutamic acid decarboxylase 2	Multiple_Complex	-19.02	3.2e-05	0.0014
TC1000000548.mm.1	-1.98	T	Vsir	V-set immunoregulatory receptor	Multiple_Complex	-19.01	0.0075	0.0796
TC0200005402.mm.1	-1.31	T	Lama5	laminin, alpha 5	Multiple_Complex	-19.01	0.0028	0.0404
TC1200000775.mm.1	-8.22	T	Rgs6	regulator of G-protein signaling 6	Multiple_Complex	-18.99	0.0002	0.006
TC1700001410.mm.1	-2.47	T	4930506C21Rik	RIKEN cDNA 4930506C21 gene	NonCoding	-18.97	1.24e-06	0.0001
TC0500000838.mm.1	1.08	T			NonCoding	-18.97	3.21e-05	0.0014
TC1700000276.mm.1	-3.12	T	3110052M02Rik	RIKEN cDNA 3110052M02 gene; RIKEN cDNA 3110052M02 gene (3110052M02Rik), mRNA.	Multiple_Complex	-18.97	0.0003	0.0078
TC0700004655.mm.1	23.31	T	Blm	Bloom syndrome, RecQ helicase-like	Multiple_Complex	-18.96	3.79e-06	0.0003	Cassette Exon	0.23
TC0500002440.mm.1	-1.23	T	4932441J04Rik	RIKEN cDNA 4932441J04 gene	NonCoding	-18.92	5.72e-05	0.0022	Alternative 5' Donor Site	0.27
TC1600002056.mm.1	1.31	T	Urb1	URB1 ribosome biogenesis 1 homolog (S. cerevisiae)	Multiple_Complex	-18.9	2.42e-08	5.48e-06
TC1200000671.mm.1	9.09	T	Syne2; Mir5101	spectrin repeat containing, nuclear envelope 2; microRNA 5101	Multiple_Complex	-18.88	0.0004	0.0105
TC1300001395.mm.1	-33.25	T	Pfkp	phosphofructokinase, platelet	Multiple_Complex	-18.88	0.0115	0.1064
TC1100000759.mm.1	-1.36	T	Llgl1	lethal giant larvae homolog 1 (Drosophila)	Multiple_Complex	-18.86	4.92e-08	9.5e-06
TC0800003090.mm.1	3	T	LOC100861897	PREDICTED: uncharacterized LOC100861897, transcript variant 1 (LOC100861897), miscRNA.; PREDICTED: uncharacterized LOC100861897, transcript variant 2 (LOC100861897), miscRNA.	NonCoding	-18.84	3.48e-05	0.0015
TC0400002606.mm.1	-272.4	T	Gabbr2	gamma-aminobutyric acid (GABA) B receptor, 2; Synthetic construct Mus musculus clone IMAGE:100062836, MGC:190967 gamma-aminobutyric acid (GABA) B receptor 2 (Gabbr2) mRNA, encodes complete protein.	Multiple_Complex	-18.82	0.0086	0.0877
TC0100000854.mm.1	1.73	T	Sh3bp4	SH3-domain binding protein 4	Multiple_Complex	-18.78	0.0005	0.0107
TC0500003415.mm.1	1.1	T	Orai2	ORAI calcium release-activated calcium modulator 2	Coding	-18.78	1.91e-05	0.001
TC1500001980.mm.1	-2.11	T	Scube1	signal peptide, CUB domain, EGF-like 1	Multiple_Complex	-18.77	0.0183	0.1449
TC1800000785.mm.1	-25.27	T	Gm9925	predicted gene 9925 [Source:MGI Symbol;Acc:MGI:3641738]	Multiple_Complex	-18.75	1.22e-05	0.0007	Cassette Exon	0.23
TC0100000427.mm.1	-17.62	T	Aox1	aldehyde oxidase 1	Multiple_Complex	-18.75	3.57e-09	1.28e-06
TC0700002265.mm.1	-1.34	T	Gm3584	predicted gene 3584 [Source:MGI Symbol;Acc:MGI:3781761]	Pseudogene	-18.75	0.0196	0.151
TC0500003694.mm.1	-5.96	T	Stard13	StAR-related lipid transfer (START) domain containing 13	Multiple_Complex	-18.74	8.18e-06	0.0005	Cassette Exon	0.35
TC0200003300.mm.1	-1.65	T	Dnm1	dynamin 1	Multiple_Complex	-18.72	1.14e-08	3.13e-06	Cassette Exon	0.3
TC0400002929.mm.1	4.33	T	Nfib	nuclear factor I/B; nuclear factor I/B (Nfib), transcript variant 3, mRNA.	Multiple_Complex	-18.7	1.11e-06	0.0001	Alternative 5' Donor Site	0.31
TC1100003146.mm.1	-4.92	T	Spns2	spinster homolog 2	Multiple_Complex	-18.69	0.0003	0.0073
TC0700002242.mm.1	-1.33	T	Vmn2r-ps40	vomeronasal 2, receptor, pseudogene 40	Pseudogene	-18.67	0.0196	0.1512
TC0100000282.mm.1	-12.5	T	Npas2	neuronal PAS domain protein 2	Multiple_Complex	-18.65	0.0006	0.0139
TC0700002235.mm.1	-1.37	T	Vmn2r33	vomeronasal 2, receptor 33; vomeronasal 2, receptor33	Coding	-18.64	0.0296	0.196
TC0700004310.mm.1	62.47	T	Kif22	kinesin family member 22	Coding	-18.57	3.77e-05	0.0016
TC0200004920.mm.1	-7.76	T	Dusp15	dual specificity phosphatase-like 15	Multiple_Complex	-18.54	3.21e-06	0.0002
TC0100001365.mm.1	-6.46	T	Colgalt2	collagen beta(1-O)galactosyltransferase 2	Coding	-18.54	2.84e-05	0.0013	Cassette Exon	0.33
TC1600001479.mm.1	-1704.21	T	Apod	apolipoprotein D	Multiple_Complex	-18.54	0.0001	0.0046
TC0300002361.mm.1	3.51	T	Ubap2l	ubiquitin-associated protein 2-like; ubiquitin associated protein 2-like	Multiple_Complex	-18.53	0.0004	0.0102	Alternative 3' Acceptor Site	0.28
TC0700001771.mm.1	-2.04	T	Slc5a11	solute carrier family 5 (sodium/glucose cotransporter), member 11	Multiple_Complex	-18.51	1.29e-06	0.0001
TC0800001757.mm.1	-1.05	T	C030037F17Rik	RIKEN cDNA C030037F17 gene [Source:MGI Symbol;Acc:MGI:1924725]	Coding	-18.5	0.0006	0.0126
TC0500002152.mm.1	24.38	T	Tyms	thymidylate synthase	Multiple_Complex	-18.5	0.0023	0.0347	Cassette Exon	0.35
TC0900001261.mm.1	4.22	T	Stag1	stromal antigen 1	Multiple_Complex	-18.49	0.0001	0.0042
TC0700001210.mm.1	-11.39	T	Gm2115	predicted gene 2115	NonCoding	-18.45	2.52e-06	0.0002
TC1600000415.mm.1	-2.89	T	Dlg1	discs, large homolog 1 (Drosophila)	Multiple_Complex	-18.45	9.07e-05	0.0032
TC0X00003323.mm.1	1.45	T	Zrsr2	zinc finger (CCCH type), RNA binding motif and serine/arginine rich 2; Synthetic construct Mus musculus clone IMAGE:100069504, MGC:199406 zinc finger (CCCH type), RNA binding motif and serine/arginine rich 2 (Zrsr2) mRNA, encodes complete protein.	Multiple_Complex	-18.42	1.03e-07	1.7e-05
TC0200002826.mm.1	1.05	T	Tpd52l2	tumor protein D52-like 2	Multiple_Complex	-18.41	0.0023	0.035	Cassette Exon	0.33
TC0200004754.mm.1	-2.2	T			NonCoding	-18.4	9.34e-09	2.67e-06
TC0500000710.mm.1	-2.02	T	Kit	kit oncogene	Multiple_Complex	-18.4	0.0011	0.0201
TC0700002981.mm.1	1.25	T	Bcl2l12	BCL2-like 12 (proline rich)	Multiple_Complex	-18.38	1.91e-07	2.71e-05
TC0X00000992.mm.1	18.92	T	Gm19974	PREDICTED: predicted gene, 19974 (Gm19974), miscRNA.	NonCoding	-18.34	0.0203	0.1549
TC0100003080.mm.1	-89.16	T	Nfasc	neurofascin	Multiple_Complex	-18.33	2.43e-05	0.0012
TC1000002248.mm.1	20.97	T	H2afy2	H2A histone family, member Y2	Coding	-18.32	0.0001	0.0038
TC0400001663.mm.1	-1.02	T	Myom3	myomesin family, member 3	Multiple_Complex	-18.31	0.0047	0.0578
TC1600001946.mm.1	-1.04	T	Tmprss15	transmembrane protease, serine 15; transmembrane protease, serine 15 (Tmprss15), transcript variant 2, mRNA.	Coding	-18.3	3.78e-05	0.0016
TC1800001284.mm.1	-1.19	T	Gm26928	predicted gene, 26928 [Source:MGI Symbol;Acc:MGI:5504043]	Multiple_Complex	-18.29	0.001	0.0192
TC0500000106.mm.1	-1.47	T	Speer8-ps1	spermatogenesis associated glutamate (E)-rich protein 8, pseudogene 1	NonCoding	-18.28	2.87e-09	1.09e-06
TC1000001881.mm.1	1.79	T	Rps12; Snora33; Snord100	ribosomal protein S12; small nucleolar RNA, H/ACA box 33; small nucleolar RNA, C/D box 100	Multiple_Complex	-18.26	0.0005	0.0115	Cassette Exon	0.26
TC0700000586.mm.1	-13.5	T	Lgi4	leucine-rich repeat LGI family, member 4	Multiple_Complex	-18.25	5.79e-06	0.0004	Cassette Exon	0.24
TC0100001092.mm.1	-13.4	T	Celrr	cerebellum expressed regulatory RNA	NonCoding	-18.25	3.74e-08	7.66e-06	Cassette Exon	0.22
TC0400001047.mm.1	-19.39	T	Pde4b	phosphodiesterase 4B, cAMP specific	Multiple_Complex	-18.22	1.16e-07	1.86e-05	Cassette Exon	0.31
TC0300003238.mm.1	-3.88	T	Mtx1	metaxin 1	NonCoding	-18.2	0.0001	0.0038
TC1800001107.mm.1	-1.48	T	Rit2	Ras-like without CAAX 2	Multiple_Complex	-18.19	2.5e-06	0.0002
TC1200000899.mm.1	10.9	T	Nrxn3	neurexin III	Multiple_Complex	-18.16	1.08e-05	0.0006
TC1700001622.mm.1	13.76	T	Ccnf; Mir5134	cyclin F; microRNA 5134	Multiple_Complex	-18.15	3.12e-08	6.65e-06
TC0100002308.mm.1	11.88	T	Myo1b	myosin IB	Multiple_Complex	-18.14	0.0003	0.0072
TC0200003872.mm.1	21.15	T	2700094K13Rik	RIKEN cDNA 2700094K13 gene	Multiple_Complex	-18.14	4.39e-06	0.0003	Alternative 3' Acceptor Site	0.23
TC0100003869.mm.1	-4.03	T	Tnni1	troponin I, skeletal, slow 1	Multiple_Complex	-18.13	1.26e-10	1.08e-07	Cassette Exon	0.27
TC0300000767.mm.1	-63.48	T	Kcnn3	potassium intermediate/small conductance calcium-activated channel, subfamily N, member 3	Multiple_Complex	-18.06	1.83e-06	0.0002
TC1100004144.mm.1	-1.19	T	Tmc6	transmembrane channel-like gene family 6	Multiple_Complex	-18.05	2.29e-06	0.0002
TC0100003315.mm.1	-38.26	T	Fam163a	family with sequence similarity 163, member A	Coding	-18.03	1.19e-07	1.89e-05	Cassette Exon	0.23
TC1900001485.mm.1	-6.43	T	Sorbs1	sorbin and SH3 domain containing 1	Multiple_Complex	-18.02	3.02e-06	0.0002
TC0500000215.mm.1	-4.74	T	Slc4a2	solute carrier family 4 (anion exchanger), member 2	Multiple_Complex	-18	0.0005	0.0113
TC0100001610.mm.1	1.06	T	Igsf8	immunoglobulin superfamily, member 8	Multiple_Complex	-17.99	4.92e-07	5.64e-05	Alternative 5' Donor Site	0.23
TC1000001213.mm.1	-1.05	T			NonCoding	-17.99	2.11e-07	2.93e-05
TC0200001355.mm.1	-1.56	T	Agbl2	ATP/GTP binding protein-like 2; Synthetic construct Mus musculus clone IMAGE:100064043, MGC:193414 Agbl2 protein (Agbl2) mRNA, encodes complete protein.	Multiple_Complex	-17.96	0.0197	0.1517
TC1600001276.mm.1	-1.07	T	Ppil2	peptidylprolyl isomerase (cyclophilin)-like 2	Multiple_Complex	-17.93	0.0002	0.0057
TC0700001644.mm.1	-20.06	T	Mical2	microtubule associated monooxygenase, calponin and LIM domain containing 2	Multiple_Complex	-17.92	3.25e-05	0.0014	Cassette Exon	0.22
TC0600001729.mm.1	-1.68	T	Sspn	sarcospan	Coding	-17.9	0.0014	0.024
TC0300001431.mm.1	-3.97	T	Unc5c	unc-5 homolog C (C. elegans)	Multiple_Complex	-17.89	2.66e-07	3.49e-05	Cassette Exon	0.32
TC0200004671.mm.1	18.44	T	Pcna	proliferating cell nuclear antigen	Multiple_Complex	-17.89	0.0005	0.0123	Alternative 3' Acceptor Site	0.23
TC0700002295.mm.1	-1.2	T	Gm20345	predicted gene, 20345	Pseudogene	-17.89	0.0016	0.027
TC1100002471.mm.1	-2.67	T	Rhbdf1	rhomboid family 1 (Drosophila)	Multiple_Complex	-17.88	1.25e-09	5.84e-07
TC1200000910.mm.1	26.36	T			NonCoding	-17.88	0.0026	0.0386	Alternative 5' Donor Site	0.23
TC1800000094.mm.1	-15.99	T	Cables1	CDK5 and Abl enzyme substrate 1	Coding	-17.85	0.0003	0.0074
TC1400002241.mm.1	1.09	T			NonCoding	-17.83	1.13e-05	0.0006
TC1400001288.mm.1	-18.61	T	Cldn10	claudin 10	Coding	-17.82	1.55e-06	0.0001
TC1200001554.mm.1	-1.04	T			NonCoding	-17.82	5.09e-05	0.002
TC0400002822.mm.1	-5.2	T	Astn2	astrotactin 2	Coding	-17.78	9.45e-07	9.4e-05
TC0200000550.mm.1	1.02	T	Hmcn2	hemicentin 2	Multiple_Complex	-17.76	0.0018	0.0298
TC0800000814.mm.1	14.34	T	Tpm4	tropomyosin 4	Multiple_Complex	-17.75	8.46e-06	0.0005
TC1000002350.mm.1	-2.63	T	Phyhipl; D630013N20Rik	phytanoyl-CoA hydroxylase interacting protein-like; RIKEN cDNA D630013N20 gene; RIKEN cDNA D630013N20 gene (D630013N20Rik), transcript variant 1, non-coding RNA.; RIKEN cDNA D630013N20 gene (D630013N20Rik), transcript variant 2, non-coding RNA.	Multiple_Complex	-17.75	0.0007	0.0145
TC0200004701.mm.1	-5.28	T	Pak7	p21 protein (Cdc42/Rac)-activated kinase 7; Synthetic construct Mus musculus clone IMAGE:100062872, MGC:190981 p21 (CDKN1A)-activated kinase 7 (Pak7) mRNA, encodes complete protein.	Multiple_Complex	-17.74	0.0012	0.0221
TC1700002348.mm.1	-82.07	T	Tubb4a	tubulin, beta 4A class IVA	Coding	-17.73	0.0009	0.0176
TC1700001975.mm.1	1.08	T	Gtf2h4	general transcription factor II H, polypeptide 4	Multiple_Complex	-17.73	0.0003	0.0076
TC1800000459.mm.1	-1.68	T	A930012L18Rik	RIKEN cDNA A930012L18 gene	NonCoding	-17.71	0.0003	0.008	Alternative 5' Donor Site	0.23
TC1800001430.mm.1	-2.74	T	Afap1l1	actin filament associated protein 1-like 1; Synthetic construct Mus musculus clone IMAGE:100016590, MGC:184586 actin filament associated protein 1-like 1 (Afap1l1) mRNA, encodes complete protein.	Multiple_Complex	-17.71	4.7e-05	0.0019
TC0500001915.mm.1	1.62	T	Gm15459	predicted gene 15459	Pseudogene	-17.71	0.0136	0.1192
TC1500002158.mm.1	-1.33	T	Hdac7	histone deacetylase 7	Multiple_Complex	-17.68	0.0006	0.0133
TC1700001497.mm.1	18.11	T	Dll1	delta-like 1 (Drosophila)	Multiple_Complex	-17.68	0.0045	0.0565
TC1900000118.mm.1	-1.22	T	Rasgrp2	RAS, guanyl releasing protein 2	Multiple_Complex	-17.64	0.0012	0.0224
TC1400000501.mm.1	26.86	T	Cdkn3	cyclin-dependent kinase inhibitor 3	Coding	-17.6	1.28e-05	0.0007	Cassette Exon	0.23
TC0700004318.mm.1	1.21	T	2001-09-01	septin 1	Multiple_Complex	-17.6	1.04e-05	0.0006
TC0500001865.mm.1	13.32	T	Brca2	breast cancer 2, early onset; Synthetic construct Mus musculus clone IMAGE:100069457, MGC:199359 breast cancer 2 (Brca2) mRNA, encodes complete protein.; breast cancer 2; breast cancer 2 (Brca2), transcript variant 2, mRNA.; breast cancer 2 (Brca2), transcript variant 1, mRNA.	Coding	-17.59	1.73e-07	2.52e-05
TC1500002067.mm.1	1.31	T	Cpne8	copine VIII	Multiple_Complex	-17.58	4.21e-05	0.0018	Cassette Exon	0.2
TC0700002259.mm.1	-1.46	T	Vmn2r44	vomeronasal 2, receptor 44	Coding	-17.55	0.0356	0.2199
TC0700002253.mm.1	-1.15	T	Vmn2r41	vomeronasal 2, receptor 41	Coding	-17.55	0.0056	0.0654
TC1100002659.mm.1	8.46	T	Cnot6	CCR4-NOT transcription complex, subunit 6	Multiple_Complex	-17.54	0.0003	0.0069
TC0100001330.mm.1	-3.59	T	Brinp3	bone morphogenetic protein/retinoic acid inducible neural specific 3	Multiple_Complex	-17.53	4.25e-07	5.03e-05
TC1300002527.mm.1	2.15	T	Bdp1	B double prime 1, subunit of RNA polymerase III transcription initiation factor IIIB	Multiple_Complex	-17.52	1.86e-07	2.66e-05
TC0700002287.mm.1	-1.46	T	Gm3616	predicted gene 3616	Pseudogene	-17.51	0.0182	0.1444
TC0700002294.mm.1	-1.46	T	Gm3683	predicted gene 3683	Pseudogene	-17.51	0.0182	0.1444
TC1700000949.mm.1	-1.51	T	Kif6	kinesin family member 6	Multiple_Complex	-17.51	7.89e-07	8.14e-05
TC0700002236.mm.1	-1.15	T	Gm7648	predicted gene 7648 [Source:MGI Symbol;Acc:MGI:3643736]	Pseudogene	-17.51	0.0043	0.0545
TC0200001786.mm.1	1.26	T	Mapkbp1	mitogen-activated protein kinase binding protein 1	Multiple_Complex	-17.5	1.18e-06	0.0001
TC0400000716.mm.1	-1.06	T	Col27a1	collagen, type XXVII, alpha 1	Multiple_Complex	-17.46	8.23e-08	1.42e-05
TC1300002526.mm.1	-1.44	T	Mccc2	methylcrotonoyl-Coenzyme A carboxylase 2 (beta)	Coding	-17.45	3.94e-09	1.39e-06
TC0900000966.mm.1	18.08	T	Mns1	meiosis-specific nuclear structural protein 1	Coding	-17.43	9.56e-05	0.0033
TC0800001390.mm.1	36.34	T	Cenpn	centromere protein N	Coding	-17.41	6.36e-07	6.91e-05	Cassette Exon	0.23
TC0400003854.mm.1	-2.38	T	4933427I22Rik	RIKEN cDNA 4933427I22 gene	NonCoding	-17.41	1.2e-05	0.0007
TC1400002493.mm.1	-1.81	T	Lect1	leukocyte cell derived chemotaxin 1	Multiple_Complex	-17.4	1.01e-10	9.15e-08
TC0600003433.mm.1	-13.02	T	Itpr2	inositol 1,4,5-triphosphate receptor 2; inositol 1,4,5-triphosphate receptor 2 (Itpr2), transcript variant 2, mRNA.	Multiple_Complex	-17.38	0.0002	0.0054	Cassette Exon	0.24
TC0X00002447.mm.1	15.97	T	Flna	filamin, alpha	Multiple_Complex	-17.37	0.0403	0.2372
TC0900000117.mm.1	3.43	T	Taf1d; Gm25500	TATA box binding protein (Tbp)-associated factor, RNA polymerase I, D; predicted gene, 25500	Multiple_Complex	-17.34	0.0057	0.0663
TC0200003231.mm.1	-2.54	T	1700007K13Rik	RIKEN cDNA 1700007K13 gene	Multiple_Complex	-17.32	1e-05	0.0006
TC1500000395.mm.1	1.12	T	Col14a1	collagen, type XIV, alpha 1	Coding	-17.31	1.14e-08	3.13e-06
TC0800003009.mm.1	1	T	Pkd1l2	polycystic kidney disease 1 like 2	Multiple_Complex	-17.29	2.64e-10	1.82e-07
TC0700002286.mm.1	-1.15	T	Gm3623	predicted gene 3623	Pseudogene	-17.29	0.0106	0.1007
TC0300002612.mm.1	-2.81	T	Vangl1	vang-like 1 (van gogh, Drosophila) (Vangl1), transcript variant 2, mRNA.; vang-like 1 (van gogh, Drosophila)	Multiple_Complex	-17.27	0.0002	0.0064
TC0300003101.mm.1	4.29	T	Rpf1	ribosome production factor 1 homolog (S. cerevisiae)	Coding	-17.27	2.92e-06	0.0002
TC1500000008.mm.1	2.02	T	Oxct1	3-oxoacid CoA transferase 1	Multiple_Complex	-17.27	6.32e-06	0.0004
TC1900001556.mm.1	-1.36	T	Pkd2l1	polycystic kidney disease 2-like 1	Multiple_Complex	-17.26	2.85e-08	6.22e-06	Cassette Exon	0.27
TC1400002343.mm.1	-4.49	T	Bmp1	bone morphogenetic protein 1	Multiple_Complex	-17.24	9.91e-05	0.0034
TC0200003607.mm.1	-3.98	T	Rbms1	RNA binding motif, single stranded interacting protein 1	Multiple_Complex	-17.23	0.0003	0.0071	Cassette Exon	0.27
TC1600001050.mm.1	16.14	T	Chaf1b	chromatin assembly factor 1, subunit B (p60)	Multiple_Complex	-17.2	2.91e-06	0.0002
TC1700001341.mm.1	6.19	T	2700099C18Rik	NDC80 homolog, kinetochore complex component pseudogene	Multiple_Complex	-17.2	1.56e-08	3.94e-06
TC0100000364.mm.1	-32.95	T	Tmeff2	transmembrane protein with EGF-like and two follistatin-like domains 2	Multiple_Complex	-17.2	0.0004	0.0091
TC1100003267.mm.1	-1.58	T	Trp53i13	transformation related protein 53 inducible protein 13	Multiple_Complex	-17.2	0.0046	0.0568
TC0500000363.mm.1	16.24	T	Whsc1	Wolf-Hirschhorn syndrome candidate 1 (human); Synthetic construct Mus musculus clone IMAGE:100063634, MGC:191107 Wolf-Hirschhorn syndrome candidate 1 (human) (Whsc1) mRNA, encodes complete protein.	Multiple_Complex	-17.19	3.39e-05	0.0015
TC1300001764.mm.1	-1.51	T	Serpinb1c	serine (or cysteine) peptidase inhibitor, clade B, member 1c	Coding	-17.17	0.0001	0.0044
TC1300001794.mm.1	-2.93	T	Eci2	enoyl-Coenzyme A delta isomerase 2	Multiple_Complex	-17.16	0.0003	0.0075	Cassette Exon	0.24
TC0900001101.mm.1	41.36	T	Ttk	Ttk protein kinase	Multiple_Complex	-17.15	2.61e-05	0.0012
TC1600000292.mm.1	-1.09	T	Chrd	chordin	Multiple_Complex	-17.14	1.29e-05	0.0007
TC0800001860.mm.1	-1.95	T	Atp7b	ATPase, Cu++ transporting, beta polypeptide; Synthetic construct Mus musculus clone IMAGE:100063608, MGC:191101 ATPase, Cu++ transporting, beta polypeptide (Atp7b) mRNA, encodes complete protein.	Coding	-17.11	2.99e-05	0.0014	Alternative 5' Donor Site	0.31
TC1100002224.mm.1	11.62	T	Fignl1	fidgetin-like 1	Multiple_Complex	-17.08	0.0012	0.0217	Cassette Exon	0.23
TC0600000838.mm.1	1.09	T	Immt	inner membrane protein, mitochondrial; Synthetic construct Mus musculus clone IMAGE:100066304, MGC:195441 inner membrane protein, mitochondrial (Immt) mRNA, encodes complete protein.	Multiple_Complex	-17.06	0.0002	0.0056	Intron Retention	0.43
TC0400002434.mm.1	-2.05	T	Ddx58	DEAD (Asp-Glu-Ala-Asp) box polypeptide 58; Synthetic construct Mus musculus clone IMAGE:100068109, MGC:195726 DEAD (Asp-Glu-Ala-Asp) box polypeptide 58 (Ddx58) mRNA, encodes complete protein.	Multiple_Complex	-17.04	0.002	0.0312
TC1100000252.mm.1	22.88	T			NonCoding	-17.04	5.16e-06	0.0003
TC0200002478.mm.1	10.09	T	Mybl2	myeloblastosis oncogene-like 2	Multiple_Complex	-17.02	0.0395	0.2341
TC0300000096.mm.1	-150.29	T	Car2	carbonic anhydrase 2	Coding	-16.98	0.0002	0.005
TC0900000069.mm.1	-1.26	T	Pgr	progesterone receptor	Multiple_Complex	-16.97	6.32e-08	1.15e-05	Alternative 5' Donor Site	0.26
TC0700004173.mm.1	2.23	T	Coq7	demethyl-Q 7	Multiple_Complex	-16.97	1.07e-06	0.0001	Alternative 3' Acceptor Site	0.26
TC1600001395.mm.1	-3.29	T	Masp1	mannan-binding lectin serine peptidase 1	Coding	-16.97	8.41e-07	8.57e-05	Cassette Exon	0.36
TC0700004265.mm.1	-1.04	T	Xpo6	exportin 6	Multiple_Complex	-16.95	7.84e-05	0.0028
TC0900000336.mm.1	9.09	T	Cdon	cell adhesion molecule-related/down-regulated by oncogenes	Coding	-16.93	2.95e-06	0.0002
TC0700004191.mm.1	1.03	T	Dnah3	dynein, axonemal, heavy chain 3	Coding	-16.92	2.14e-11	3.12e-08
TC0200004791.mm.1	-1.93	T	Nkx2-2	NK2 homeobox 2	Multiple_Complex	-16.92	5.92e-09	1.89e-06	Alternative 5' Donor Site	0.26
TC0600002462.mm.1	-1.04	T	Smyd1	SET and MYND domain containing 1	Multiple_Complex	-16.88	9.9e-06	0.0006
TC0100001581.mm.1	-38.12	T	Adamts4	a disintegrin-like and metallopeptidase (reprolysin type) with thrombospondin type 1 motif, 4	Coding	-16.85	7.65e-06	0.0005
TC0900002325.mm.1	2.06	T	Wdr61	WD repeat domain 61	Multiple_Complex	-16.84	1.21e-06	0.0001
TC1600000700.mm.1	24.07	T	C330027C09Rik	RIKEN cDNA C330027C09 gene	Multiple_Complex	-16.84	0.0003	0.0073	Alternative 3' Acceptor Site	0.33
TC1000001894.mm.1	-17.23	T	Enpp1	ectonucleotide pyrophosphatase/phosphodiesterase 1; Synthetic construct Mus musculus clone IMAGE:100064115, MGC:193486 ectonucleotide pyrophosphatase/phosphodiesterase 1 (Enpp1) mRNA, encodes complete protein.	Multiple_Complex	-16.84	0.0007	0.0152
TC1200002493.mm.1	-2.41	T	Wdr60	WD repeat domain 60	Coding	-16.83	2.99e-06	0.0002
TC0500001821.mm.1	-1.04	T	Mtus2	microtubule associated tumor suppressor candidate 2	Multiple_Complex	-16.81	4e-14	4.21e-10
TC1700000528.mm.1	-12.51	T	Abcg1	ATP-binding cassette, sub-family G (WHITE), member 1	Multiple_Complex	-16.79	0.0008	0.0157
TC0100000224.mm.1	1.01	T	Ptpn18	protein tyrosine phosphatase, non-receptor type 18; protein tyrosine phosphatase, non-receptor type 18 (Ptpn18), mRNA.	Coding	-16.79	0.0024	0.0359
TC0300002860.mm.1	11.71	T	Fnbp1l; Mir7657	formin binding protein 1-like; microRNA 7657	Multiple_Complex	-16.78	1.44e-08	3.72e-06
TC1100000565.mm.1	-3.15	T	Clk4	CDC like kinase 4	Multiple_Complex	-16.76	0.0039	0.0506
TC0900000605.mm.1	-286.51	T	Cryab	crystallin, alpha B; crystallin, alpha B (Cryab), mRNA.	Coding	-16.76	0.0003	0.0077
TC0X00001780.mm.1	39.66	T	Plp2	proteolipid protein 2	Multiple_Complex	-16.76	0.0001	0.0041	Alternative 5' Donor Site	0.26
TC1000002677.mm.1	-46.19	T	Rmst	rhabdomyosarcoma 2 associated transcript (non-coding RNA)	NonCoding	-16.75	0.0005	0.0108
TC0300002310.mm.1	37.18	T	Pmf1	polyamine-modulated factor 1	Coding	-16.75	0.0004	0.0103
TC0900002128.mm.1	-5.21	T	Oaf	OAF homolog (Drosophila)	Coding	-16.73	1.2e-07	1.91e-05
TC0700004224.mm.1	-1.12	T	Ndufab1	NADH dehydrogenase (ubiquinone) 1, alpha/beta subcomplex, 1	Multiple_Complex	-16.72	0.0002	0.0058	Alternative 5' Donor Site	0.35
TC0800002715.mm.1	-3.21	T			NonCoding	-16.71	1.83e-09	7.71e-07
TC0200003289.mm.1	1.17	T	Gm13425	predicted gene 13425	NonCoding	-16.71	1.34e-07	2.07e-05
TC0800000148.mm.1	-17.83	T	Arhgef10	Rho guanine nucleotide exchange factor (GEF) 10	Multiple_Complex	-16.69	4.77e-06	0.0003	Cassette Exon	0.28
TC0200001749.mm.1	-6.82	T	Ivd	isovaleryl coenzyme A dehydrogenase	Multiple_Complex	-16.69	0.0002	0.005	Cassette Exon	0.29
TC0800002386.mm.1	-3.23	T	Slc25a42	solute carrier family 25, member 42	Multiple_Complex	-16.69	0.0005	0.0109	Cassette Exon	0.24
TC0800002184.mm.1	-3.9	T	Wwc2	WW, C2 and coiled-coil domain containing 2	Multiple_Complex	-16.67	0.0012	0.0219
TC0100003401.mm.1	-73.45	T	Fmo1	flavin containing monooxygenase 1	Multiple_Complex	-16.65	0.0064	0.0716
TC0700004657.mm.1	1.22	T	Sec11a	SEC11 homolog A, signal peptidase complex subunit; SEC11 homolog A (S. cerevisiae)	Multiple_Complex	-16.65	2.45e-07	3.29e-05
TC1800000638.mm.1	-1.43	T	Sh3tc2	SH3 domain and tetratricopeptide repeats 2; Synthetic construct Mus musculus clone IMAGE:100063631, MGC:191100 SH3 domain and tetratricopeptide repeats 2 (Sh3tc2) mRNA, encodes complete protein.	Coding	-16.64	1.18e-05	0.0007
TC0800001437.mm.1	8.53	T	Gse1	genetic suppressor element 1	Multiple_Complex	-16.64	1.67e-11	2.66e-08	Cassette Exon	0.24
TC1500001630.mm.1	-1.25	T	Asap1	ArfGAP with SH3 domain, ankyrin repeat and PH domain1; ArfGAP with SH3 domain, ankyrin repeat and PH domain1 (Asap1), mRNA.	Multiple_Complex	-16.63	0.0281	0.1898
TC0700002280.mm.1	-1.45	T	Gm5583	predicted gene 5583 [Source:MGI Symbol;Acc:MGI:3646061]	Pseudogene	-16.61	0.006	0.069
TC1800000682.mm.1	-12.96	T	Sec11c	SEC11 homolog C, signal peptidase complex subunit; SEC11 homolog C (S. cerevisiae)	Multiple_Complex	-16.59	1.36e-06	0.0001	Cassette Exon	0.31
TC0X00002072.mm.1	1.05	T	Rhox2-ps; Gm6310	reproductive homeobox 2, pseudogene [Source:MGI Symbol;Acc:MGI:3646282]; predicted pseudogene 6310	Pseudogene	-16.56	4.64e-09	1.56e-06
TC0200004159.mm.1	-29.77	T	Cd82	CD82 antigen	Multiple_Complex	-16.55	8.11e-05	0.0029	Cassette Exon	0.25
TC0300002543.mm.1	-1.57	T	Pde4dip; Mir7225	phosphodiesterase 4D interacting protein (myomegalin); microRNA 7225	Multiple_Complex	-16.55	0.0025	0.037
TC0700002279.mm.1	-1.32	T	Vmn2r38	vomeronasal 2, receptor 38	Coding	-16.55	0.026	0.1809
TC1000001967.mm.1	-24.37	T	Nkain2	Na+/K+ transporting ATPase interacting 2	Multiple_Complex	-16.54	4.44e-05	0.0018
TC0100001656.mm.1	26.55	T	Exo1	exonuclease 1	Multiple_Complex	-16.51	0.0067	0.0742
TC1600001582.mm.1	-22.91	T	Slc15a2	solute carrier family 15 (H+/peptide transporter), member 2	Multiple_Complex	-16.51	7.1e-05	0.0026	Cassette Exon	0.25
TC0500001649.mm.1	1.04	T	Lamtor4	late endosomal/lysosomal adaptor, MAPK and MTOR activator 4	Multiple_Complex	-16.5	3.55e-05	0.0015
TC1600000222.mm.1	-2.94	T	Ccdc74a	coiled-coil domain containing 74A	Multiple_Complex	-16.48	1.48e-05	0.0008
TC0600003116.mm.1	-1.42	T	Eno2	enolase 2, gamma neuronal	Multiple_Complex	-16.47	5.73e-06	0.0004
TC1500002351.mm.1	-2	T	Chkb	choline kinase beta	Multiple_Complex	-16.45	0.0123	0.1111
TC0800003169.mm.1	-1.96	T	Pgbd5	piggyBac transposable element derived 5	Multiple_Complex	-16.43	0.001	0.0198
TC1100002429.mm.1	-10.31	T	Sptbn1	spectrin beta, non-erythrocytic 1	Multiple_Complex	-16.43	1.58e-06	0.0001
TC1600000866.mm.1	-2.18	T	Mir99ahg	Mir99a and Mirlet7c-1 host gene (non-protein coding)	NonCoding	-16.41	1.8e-05	0.0009
TC1500001198.mm.1	-2.6	T	Spef2	sperm flagellar 2	Coding	-16.35	0.0132	0.117
TC1900000119.mm.1	-2.25	T	Nrxn2	neurexin II	Multiple_Complex	-16.32	1.41e-05	0.0008
TC0900002971.mm.1	-5.78	T	Bfsp2	beaded filament structural protein 2, phakinin	Multiple_Complex	-16.31	2.28e-10	1.63e-07
TC0300003208.mm.1	-1.33	T	Fgf2	fibroblast growth factor 2; Synthetic construct Mus musculus clone IMAGE:100062861, MGC:190976 fibroblast growth factor 2 (Fgf2) mRNA, encodes complete protein.	Multiple_Complex	-16.3	1.32e-06	0.0001
TC1400000135.mm.1	-4.4	T	Thrb	thyroid hormone receptor beta; thyroid hormone receptor beta (Thrb), transcript variant 1, mRNA.	Coding	-16.3	0.0008	0.0169
TC0900003024.mm.1	-1.84	T	Mapkapk3	mitogen-activated protein kinase-activated protein kinase 3	Multiple_Complex	-16.26	0.0002	0.0057	Cassette Exon	0.34
TC0700004086.mm.1	-3.83	T	Tmem41b	transmembrane protein 41B	Multiple_Complex	-16.24	0.0164	0.1346
TC1600002110.mm.1	-2.16	T	Cldn14	claudin 14	Multiple_Complex	-16.24	1.51e-08	3.84e-06	Alternative 5' Donor Site	0.27
TC0X00000649.mm.1	-2.87	T	Mtm1	X-linked myotubular myopathy gene 1	Multiple_Complex	-16.23	0.0287	0.1922
TC0200005498.mm.1	31.3	T	Dlx1as	distal-less homeobox 1, antisense	NonCoding	-16.22	0.0005	0.0112
TC0100000551.mm.1	4.37	T	Map2	microtubule-associated protein 2	Multiple_Complex	-16.22	0.0038	0.0503
TC1600000344.mm.1	-1.76	T			NonCoding	-16.22	0.0017	0.0287
TC0700002299.mm.1	-1.6	T	Vmn2r-ps51	vomeronasal 2, receptor, pseudogene 51	Pseudogene	-16.2	0.0292	0.1947
TC1600000618.mm.1	2.62	T	Zbtb20; Mir568	zinc finger and BTB domain containing 20; microRNA 568	Multiple_Complex	-16.19	0.0007	0.0152
TC1900000890.mm.1	-2.95	T	Aldh3b1	aldehyde dehydrogenase 3 family, member B1	Coding	-16.19	1.98e-07	2.79e-05
TC1700001740.mm.1	-4.3	T	AI413582	expressed sequence AI413582	Multiple_Complex	-16.19	0.0001	0.0037	Cassette Exon	0.46
TC1500001905.mm.1	2.2	T	Rps19bp1	ribosomal protein S19 binding protein 1	Coding	-16.19	0.0063	0.0714
TC1400002719.mm.1	1.91	T	Dzip1	DAZ interacting protein 1	Coding	-16.19	0.0007	0.0153	Alternative 3' Acceptor Site	0.37
TC0600002870.mm.1	-2.11	T	Cntn3	contactin 3	Multiple_Complex	-16.17	0.0097	0.0946
TC0700002301.mm.1	-1.17	T	Vmn2r48	vomeronasal 2, receptor 48	Coding	-16.15	0.0095	0.0934
TC0200003308.mm.1	1.4	T	Cdk9; Mir2861; Mir3960	cyclin-dependent kinase 9 (CDC2-related kinase); microRNA 2861; microRNA 3960; microRNA 3960 (Mir3960), microRNA.	Multiple_Complex	-16.14	1e-06	9.84e-05
TC0200001532.mm.1	1	T	Elf5	E74-like factor 5	Multiple_Complex	-16.13	2.16e-05	0.0011	Alternative 3' Acceptor Site	0.27
TC0900001633.mm.1	-33.35	T	Fam198a	family with sequence similarity 198, member A	Coding	-16.12	7.12e-08	1.27e-05
TC1900000099.mm.1	9.34	T	Cdca5	cell division cycle associated 5	Multiple_Complex	-16.12	0.0019	0.0306
TC1100002702.mm.1	-2.49	T	Jade2	jade family PHD finger 2	Multiple_Complex	-16.12	1.68e-07	2.46e-05
TC0100003175.mm.1	1	T	Lhx9	LIM homeobox protein 9	Multiple_Complex	-16.1	1.03e-08	2.89e-06
TC1900000183.mm.1	-2.18	T	Fth1	ferritin heavy polypeptide 1; ferritin heavy chain 1	Multiple_Complex	-16.09	1.44e-06	0.0001
TC0600002903.mm.1	18.77	T	Rad18	RAD18 E3 ubiquitin protein ligase; RAD18 homolog (S. cerevisiae)	Multiple_Complex	-16.06	0.0015	0.0259	Alternative 5' Donor Site	0.31
TC0700002303.mm.1	-1.25	T	Vmn2r50	vomeronasal 2, receptor 50	Coding	-16.06	0.0184	0.1451
TC0400001814.mm.1	-1.05	T			NonCoding	-16.05	1.61e-07	2.39e-05
TC1800000681.mm.1	-1.31	T	Oacyl	O-acyltransferase like	Multiple_Complex	-16.04	0.0254	0.1784
TC0400001683.mm.1	1.47	T	Hnrnpr; 9130020K20Rik	heterogeneous nuclear ribonucleoprotein R; RIKEN cDNA 9130020K20 gene	Multiple_Complex	-16.03	3.66e-07	4.47e-05
TC1400002150.mm.1	43.28	T	Ska3	spindle and kinetochore associated complex subunit 3	Coding	-16.02	1.09e-05	0.0006
TC0900001302.mm.1	15.63	T	Topbp1	topoisomerase (DNA) II binding protein 1	Multiple_Complex	-16.01	0.0022	0.0339
TC0700002277.mm.1	-1.39	T	Vmn2r39	vomeronasal 2, receptor 39	Coding	-16.01	0.0279	0.189
TC0900002887.mm.1	-2.34	T	Zbtb38; E030011O05Rik	zinc finger and BTB domain containing 38; RIKEN cDNA E030011O05 gene; Synthetic construct Mus musculus clone IMAGE:100063566, MGC:191093 zinc finger and BTB domain containing 38 (Zbtb38) mRNA, encodes complete protein.	Multiple_Complex	-16	8.05e-08	1.4e-05	Cassette Exon	0.26
TC1200000740.mm.1	-5.51	T	Galnt16	UDP-N-acetyl-alpha-D-galactosamine:polypeptide N-acetylgalactosaminyltransferase 16	Multiple_Complex	-15.99	0.0007	0.0146
TC0X00001277.mm.1	-8.51	T	Drp2	dystrophin related protein 2; dystrophin related protein 2 (Drp2), mRNA.	Multiple_Complex	-15.96	0.0001	0.0046
TC0400000916.mm.1	2.19	T	Gm12609; Gm12610; RP23-445E3.1; RP23-445E3.2	predicted gene 12609 [Source:MGI Symbol;Acc:MGI:3652142]; predicted gene 12610 [Source:MGI Symbol;Acc:MGI:3652143]; novel transcript	NonCoding	-15.93	0.0032	0.0441	Cassette Exon	0.34
TC1100000039.mm.1	-11.2	T	Gatsl3	GATS protein-like 3	Coding	-15.92	3.5e-05	0.0015
TC1500000821.mm.1	-2.3	T	Ppara	peroxisome proliferator activated receptor alpha	Multiple_Complex	-15.92	0.0225	0.1653
TC0700000974.mm.1	-2.24	T			NonCoding	-15.92	3.03e-06	0.0002
TC1100000033.mm.1	1.02	T	Sec14l3	SEC14-like lipid binding 3; SEC14-like 3 (S. cerevisiae)	Multiple_Complex	-15.91	1.29e-05	0.0007
TC1200002154.mm.1	-2.91	T	Ston2	stonin 2	Multiple_Complex	-15.91	0.0003	0.0071
TC0200001229.mm.1	5.96	T	Ssrp1	structure specific recognition protein 1; structure specific recognition protein 1 (Ssrp1), transcript variant 1, mRNA.	Multiple_Complex	-15.9	0.0391	0.233
TC0700002102.mm.1	-2.31	T	Dhcr7	7-dehydrocholesterol reductase	Multiple_Complex	-15.89	0.0002	0.0061
TC0900003011.mm.1	-1.4	T	Parp3	poly (ADP-ribose) polymerase family, member 3	Multiple_Complex	-15.89	9.53e-06	0.0006
TC1900001051.mm.1	-2.79	T	Lgals12	lectin, galactose binding, soluble 12	Coding	-15.88	0.0037	0.0488
TC1300001666.mm.1	21.32	T	Gmnn	geminin	Coding	-15.86	0.0142	0.1223
TC0600002436.mm.1	17.77	T			NonCoding	-15.85	1.1e-06	0.0001
TC1800001463.mm.1	-2.84	T	Atp8b1	ATPase, class I, type 8B, member 1	Coding	-15.83	7.82e-06	0.0005
TC0500002752.mm.1	-1.3	T	Ppef2	protein phosphatase, EF hand calcium-binding domain 2	Coding	-15.82	0.0003	0.0073	Cassette Exon	0.23
TC0300000902.mm.1	-1.53	T	Ctsk	cathepsin K	Coding	-15.81	1.34e-06	0.0001	Cassette Exon	0.24
TC1100002862.mm.1	-1.93	T	Flcn	folliculin	Multiple_Complex	-15.81	1.76e-05	0.0009
TC0400001147.mm.1	3.9	T	Zcchc11	zinc finger, CCHC domain containing 11	Multiple_Complex	-15.8	0.0106	0.1007
TC0700001908.mm.1	-1.16	T	Btbd16	BTB (POZ) domain containing 16	Coding	-15.8	2.39e-09	9.45e-07	Cassette Exon	0.34
TC1400002139.mm.1	-7.6	T	Gjb2	gap junction protein, beta 2	Coding	-15.76	1.91e-05	0.001
TC0300002792.mm.1	-1.93	T			NonCoding	-15.75	2.61e-06	0.0002
TC0500000080.mm.1	-1.99	T	Sema3d	sema domain, immunoglobulin domain (Ig), short basic domain, secreted, (semaphorin) 3D	Multiple_Complex	-15.75	0.0007	0.0142
TC1400001054.mm.1	-1.5	T	Lcp1	lymphocyte cytosolic protein 1	Multiple_Complex	-15.73	0.0253	0.1776
TC0300002371.mm.1	-1.34	T	Npr1	natriuretic peptide receptor 1	Multiple_Complex	-15.67	0.0078	0.0818	Cassette Exon	0.26
TC1900000693.mm.1	-3.85	T	Tmem180	transmembrane protein 180	Multiple_Complex	-15.67	0.0002	0.0048
TC0200000803.mm.1	-1.32	T	Lypd6b	LY6/PLAUR domain containing 6B	Multiple_Complex	-15.67	0.0004	0.0093
TC0900002293.mm.1	-1.09	T	Gm6981	glyceraldehyde-3-phosphate dehydrogenase pseudogene	Multiple_Complex	-15.67	3.86e-07	4.66e-05
TC0500000492.mm.1	-2.74	T	9630001P10Rik	RIKEN cDNA 9630001P10 gene	NonCoding	-15.67	7.14e-05	0.0026	Alternative 3' Acceptor Site	0.31
TC0200005271.mm.1	18.68	T	Aurka	aurora kinase A	Multiple_Complex	-15.66	0.0049	0.0599
TC0100001526.mm.1	-2.23	T	Creg1	cellular repressor of E1A-stimulated genes 1	Coding	-15.66	5.38e-08	1.01e-05	Cassette Exon	0.27
TC1300000551.mm.1	-3.02	T	Id4	inhibitor of DNA binding 4; Synthetic construct Mus musculus clone IMAGE:100069483, MGC:199385 inhibitor of DNA binding 4 (Id4) mRNA, encodes complete protein.	Coding	-15.64	7.57e-05	0.0028
TC0600001212.mm.1	-3.32	T	Grm7	glutamate receptor, metabotropic 7	Multiple_Complex	-15.58	1.04e-06	0.0001	Alternative 3' Acceptor Site	0.36
TC0900000767.mm.1	-2.67	T	Larp6	La ribonucleoprotein domain family, member 6	Coding	-15.52	3.27e-08	6.91e-06	Cassette Exon	0.21
TC1100000884.mm.1	4.49	T	Rpl26; Gm15772	ribosomal protein L26; ribosomal protein L26 pseudogene	Multiple_Complex	-15.52	0.0001	0.0038
TC1400000780.mm.1	-2.62	T	Cpne6	copine VI	Multiple_Complex	-15.51	6.85e-06	0.0004
TC0200000222.mm.1	-2.69	T	Il15ra	interleukin 15 receptor, alpha chain; interleukin 15 receptor, alpha chain (Il15ra), transcript variant 2, mRNA.; interleukin 15 receptor, alpha chain (Il15ra), transcript variant 1, mRNA.	Multiple_Complex	-15.51	7.86e-09	2.34e-06
TC0700002232.mm.1	-1.46	T	Vmn2r-ps36	vomeronasal 2, receptor, pseudogene 36	Pseudogene	-15.51	0.0117	0.1079
TC1100001204.mm.1	1.25	T	Zfp207	zinc finger protein 207	Multiple_Complex	-15.5	0.0004	0.0106
TC1200000415.mm.1	8.64	T	G2e3	G2/M-phase specific E3 ubiquitin ligase	Multiple_Complex	-15.49	2e-05	0.001
TC1300000482.mm.1	-3.52	T	Phactr1	phosphatase and actin regulator 1; phosphatase and actin regulator 1 (Phactr1), transcript variant 1, mRNA.	Multiple_Complex	-15.49	1.38e-07	2.11e-05	Cassette Exon	0.3
TC0100003868.mm.1	-2.92	T			NonCoding	-15.49	5.49e-07	6.15e-05
TC0700004547.mm.1	-1.01	T	Muc6	mucin 6, gastric	Coding	-15.48	2.21e-06	0.0002
TC0300002093.mm.1	-1.43	T	A730090N16Rik	RIKEN cDNA A730090N16 gene	NonCoding	-15.47	6.55e-08	1.18e-05	Alternative 5' Donor Site	0.26
TC0700002730.mm.1	6.28	T	Gm6579	PREDICTED: predicted gene 6579 (Gm6579), miscRNA.	NonCoding	-15.47	0.0002	0.0059
TC0700002275.mm.1	-1.45	T	Vmn2r40	vomeronasal 2, receptor 40	Coding	-15.45	0.0159	0.132
TC1600001057.mm.1	4.19	T	Ttc3	tetratricopeptide repeat domain 3; Synthetic construct Mus musculus clone IMAGE:100068069, MGC:195686 tetratricopeptide repeat domain 3 (Ttc3) mRNA, encodes complete protein.	Multiple_Complex	-15.44	0.0002	0.0055
TC1000003088.mm.1	-1.7	T			NonCoding	-15.44	1.85e-06	0.0002
TC1000002520.mm.1	-6.05	T	Gng7	guanine nucleotide binding protein (G protein), gamma 7	Coding	-15.43	1.3e-07	2.03e-05
TC0700003567.mm.1	1.01	T	Plin1	perilipin 1	Coding	-15.43	3.73e-05	0.0016
TC0700001349.mm.1	1.3	T	Ndufc2	NADH dehydrogenase (ubiquinone) 1, subcomplex unknown, 2	Multiple_Complex	-15.43	7.87e-05	0.0028	Alternative 5' Donor Site	0.34
TC1400001730.mm.1	-1.74	T	Ldb3	LIM domain binding 3	Multiple_Complex	-15.43	9.97e-06	0.0006
TC0700002715.mm.1	-1.7	T	Spred3	sprouty-related, EVH1 domain containing 3	Multiple_Complex	-15.43	5.79e-08	1.07e-05
TC0800002158.mm.1	17.56	T	Helt	helt bHLH transcription factor	Coding	-15.4	0.0013	0.023
TC1300002542.mm.1	13.43	T	Cenph	centromere protein H	Multiple_Complex	-15.4	7.77e-06	0.0005
TC0800002052.mm.1	3.08	T	Eri1	exoribonuclease 1	Multiple_Complex	-15.38	0.0031	0.0436
TC0900000540.mm.1	16.53	T	Fxyd6	FXYD domain-containing ion transport regulator 6	Multiple_Complex	-15.37	1.51e-06	0.0001	Cassette Exon	0.21
TC1000001830.mm.1	-6.45	T	Pde7b	phosphodiesterase 7B	Multiple_Complex	-15.34	4.62e-07	5.37e-05
TC0300000762.mm.1	-1.39	T	Gm15417	predicted gene 15417	NonCoding	-15.34	1.24e-06	0.0001
TC0300001249.mm.1	7.59	T	Pde5a	phosphodiesterase 5A, cGMP-specific	Coding	-15.32	0.0492	0.2677
TC0500002993.mm.1	1.66	T	Noc4l	nucleolar complex associated 4 homolog (S. cerevisiae)	Multiple_Complex	-15.31	0.0005	0.011
TC0900002458.mm.1	-1.03	T	A730043L09Rik	RIKEN cDNA A730043L09 gene	Multiple_Complex	-15.31	0.0004	0.0106
TC0300001364.mm.1	36.15	T	Cenpe	centromere protein E	Coding	-15.3	1.39e-06	0.0001
TC0500001270.mm.1	4.33	T	Cit	citron	Multiple_Complex	-15.29	0.0002	0.0058	Cassette Exon	0.25
TC0700000806.mm.1	-5.9	T	Josd2; Mir7052	Josephin domain containing 2; microRNA 7052	Multiple_Complex	-15.28	1.74e-05	0.0009
TC0200000510.mm.1	1.05	T	Coq4	coenzyme Q4 homolog (yeast)	Multiple_Complex	-15.28	0.0044	0.0555
TC1100003394.mm.1	-1.81	T	Mmp28	matrix metallopeptidase 28 (epilysin)	Multiple_Complex	-15.26	1.18e-05	0.0007
TC1100004196.mm.1	-1.07	T	Slc38a10	solute carrier family 38, member 10	Multiple_Complex	-15.25	0.0004	0.01
TC0200005516.mm.1	-7.61	T	Tmem189	transmembrane protein 189	Multiple_Complex	-15.24	5.98e-05	0.0023
TC0100002562.mm.1	12.94	T	Igfbp5	insulin-like growth factor binding protein 5	Multiple_Complex	-15.24	0.0015	0.0252
TC0400002454.mm.1	11.23	T	Bag1	BCL2-associated athanogene 1	Coding	-15.18	0.0118	0.1082
TC0600002607.mm.1	-15.24	T	Sfxn5	sideroflexin 5; Synthetic construct Mus musculus clone IMAGE:100063877, MGC:193344 sideroflexin 5 (Sfxn5) mRNA, encodes complete protein.	Multiple_Complex	-15.18	0.0011	0.021	Cassette Exon	0.27
TC0700003451.mm.1	-2.64	T	Synm	synemin, intermediate filament protein; Synthetic construct Mus musculus clone IMAGE:100068133, MGC:195750 synemin, intermediate filament protein (Synm) mRNA, encodes complete protein.	Coding	-15.18	1.34e-05	0.0007	Cassette Exon	0.36
TC1100000571.mm.1	1.37	T	Phykpl	5-phosphohydroxy-L-lysine phospholyase	Multiple_Complex	-15.17	1.62e-07	2.39e-05
TC1800000092.mm.1	15.36	T	Rbbp8	retinoblastoma binding protein 8	Multiple_Complex	-15.15	0.0055	0.065
TC1100002480.mm.1	1.02	T	Smim23	small integral membrane protein 23	Coding	-15.13	2.83e-06	0.0002
TC1500000222.mm.1	-3.73	T	Cpq	carboxypeptidase Q	Multiple_Complex	-15.13	0.0003	0.008
TC0900001431.mm.1	-2.03	T	Shisa5	shisa family member 5; shisa homolog 5 (Xenopus laevis)	Multiple_Complex	-15.12	0.0012	0.0221
TC1000002632.mm.1	79.13	T	Ascl1	achaete-scute complex homolog 1 (Drosophila)	Coding	-15.11	0.0066	0.0733
TC0X00002700.mm.1	-1.07	T	Gm14809; RP23-414J22.2	predicted gene 14809 [Source:MGI Symbol;Acc:MGI:3705177]; novel transcript	NonCoding	-15.11	1.58e-05	0.0008
TC0400003439.mm.1	1.78	T	Kcnq4	potassium voltage-gated channel, subfamily Q, member 4	Multiple_Complex	-15.1	1.73e-07	2.52e-05
TC0300001719.mm.1	-2.01	T	Naaladl2	PREDICTED: N-acetylated alpha-linked acidic dipeptidase-like 2, transcript variant 2 (Naaladl2), mRNA.	Multiple_Complex	-15.1	4.35e-06	0.0003	Cassette Exon	0.27
TC0100003416.mm.1	17.32	T	BC055324	cDNA sequence BC055324	Multiple_Complex	-15.03	0.0007	0.0147	Alternative 5' Donor Site	0.33
TC1700000625.mm.1	1.12	T	H2-Ob	histocompatibility 2, O region beta locus	Multiple_Complex	-15.03	0.0002	0.0062	Alternative 3' Acceptor Site	0.27
TC0600001258.mm.1	-27.35	T	Irak2	interleukin-1 receptor-associated kinase 2	Multiple_Complex	-15	2.68e-05	0.0012
TC0400001582.mm.1	-1.17	T	Snord99; Snhg12; Snora61; Snora44	small nucleolar RNA, C/D box 99; small nucleolar RNA host gene 12; small nucleolar RNA, H/ACA box 61; small nucleolar RNA, H/ACA box 44	Multiple_Complex	-14.98	0.0002	0.0052
TC0400000381.mm.1	-2.06	T	Il11ra1	interleukin 11 receptor, alpha chain 1	Multiple_Complex	-14.95	3.51e-07	4.33e-05	Cassette Exon	0.28
TC1300000998.mm.1	-16.87	T	Edil3	EGF-like repeats and discoidin I-like domains 3	Multiple_Complex	-14.95	0.0005	0.0111	Cassette Exon	0.31
TC0700004565.mm.1	-1.78	T	Ctsd; Ifitm10	cathepsin D; interferon induced transmembrane protein 10	Multiple_Complex	-14.95	7.92e-06	0.0005
TC0100001483.mm.1	-1.24	T			NonCoding	-14.95	8.29e-06	0.0005
TC0100000984.mm.1	14.49	T	Gm20253	PREDICTED: predicted gene, 20253 (Gm20253), miscRNA.	NonCoding	-14.94	0.0004	0.0095
TC0100002796.mm.1	-1.11	T	Gm17090; RP24-500O1.1	predicted gene 17090 [Source:MGI Symbol;Acc:MGI:4937917]; novel transcript	NonCoding	-14.94	5.98e-05	0.0023
TC0900001158.mm.1	1.82	T	Adamts7	a disintegrin-like and metallopeptidase (reprolysin type) with thrombospondin type 1 motif, 7	Multiple_Complex	-14.94	1.08e-06	0.0001
TC1200000865.mm.1	-6.33	T	Cipc	CLOCK interacting protein, circadian	Multiple_Complex	-14.93	1.64e-07	2.42e-05
TC0700002717.mm.1	-1.03	T	Catsperg1	catsper channel auxiliary subunit gamma 1	Multiple_Complex	-14.92	0.0009	0.0185
TC0300002500.mm.1	2.78	T	Hist2h3c2; Hist2h3b	histone cluster 2, H3c2; Synthetic construct Mus musculus clone IMAGE:100063598, MGC:191106 histone cluster 2, H3b (Hist2h3b) mRNA, encodes complete protein.	Coding	-14.92	7.89e-05	0.0028	Alternative 5' Donor Site	0.27
TC1300002197.mm.1	9.09	T	Zfp367	zinc finger protein 367	Multiple_Complex	-14.92	2.49e-06	0.0002
TC1600000220.mm.1	-1.91	T	P2rx6	purinergic receptor P2X, ligand-gated ion channel, 6	Multiple_Complex	-14.91	7.41e-05	0.0027	Cassette Exon	0.25
TC0400002062.mm.1	-1.89	T	Hes5	hairy and enhancer of split 5 (Drosophila)	Multiple_Complex	-14.89	3.34e-05	0.0015	Alternative 5' Donor Site	0.27
TC0900002322.mm.1	-25.76	T	Acsbg1; Gm2069	acyl-CoA synthetase bubblegum family member 1; PREDICTED: predicted gene 2069 (Gm2069), miscRNA.	Multiple_Complex	-14.89	0.0005	0.0118	Alternative 5' Donor Site	0.23
TC0900003218.mm.1	-1.18	T	Zcwpw2	zinc finger, CW type with PWWP domain 2	Multiple_Complex	-14.88	7.38e-05	0.0027	Cassette Exon	0.27
TC0600001293.mm.1	-5.58	T	Fam21	family with sequence similarity 21	Coding	-14.88	1.92e-05	0.001
TC0500003284.mm.1	-3.5	T	Slc15a4	solute carrier family 15, member 4	Multiple_Complex	-14.87	0.0004	0.0103
TC0800002169.mm.1	-1.15	T	Stox2	storkhead box 2	Multiple_Complex	-14.87	0.0097	0.095
TC0500002344.mm.1	-4.11	T	Fam184b	family with sequence similarity 184, member B	Multiple_Complex	-14.87	0.0001	0.0046
TC0600000735.mm.1	-16.14	T	Grid2	glutamate receptor, ionotropic, delta 2	Multiple_Complex	-14.86	0.0064	0.0714
TC0700000486.mm.1	-1.02	T	9530053A07Rik	RIKEN cDNA 9530053A07 gene; Synthetic construct Mus musculus clone IMAGE:100016454, MGC:184505 RIKEN cDNA 9530053A07 gene (9530053A07Rik) mRNA, encodes complete protein.	Multiple_Complex	-14.85	2.45e-06	0.0002
TC1800000980.mm.1	-281.25	T	Abhd3	abhydrolase domain containing 3	Coding	-14.85	0.0004	0.009
TC0900001487.mm.1	-1.11	T	Trank1	tetratricopeptide repeat and ankyrin repeat containing 1	Multiple_Complex	-14.84	8.32e-07	8.5e-05
TC1200000833.mm.1	53.15	T	Fos	FBJ osteosarcoma oncogene	Multiple_Complex	-14.83	0.0001	0.0043
TC1800000613.mm.1	-1.75	T	Dctn4	dynactin 4	Multiple_Complex	-14.82	5.3e-05	0.0021
TC0200003533.mm.1	-9.59	T	Cacnb4	calcium channel, voltage-dependent, beta 4 subunit	Multiple_Complex	-14.81	2e-05	0.001
TC1200000247.mm.1	1.17	T	Myt1l	myelin transcription factor 1-like	Multiple_Complex	-14.8	0.0064	0.0715
TC1100003044.mm.1	1.11	T	Dnah2	dynein, axonemal, heavy chain 2	Multiple_Complex	-14.8	3.87e-05	0.0016
TC0700001385.mm.1	-3.4	T	Gdpd5	glycerophosphodiester phosphodiesterase domain containing 5	Coding	-14.8	0.0036	0.0479
TC0700002274.mm.1	-1.51	T	Vmn2r-ps43	vomeronasal 2, receptor, pseudogene 43	Pseudogene	-14.79	0.0227	0.166
TC0300002245.mm.1	-2.4	T	Fhdc1	FH2 domain containing 1	Multiple_Complex	-14.78	8.6e-06	0.0005	Alternative 5' Donor Site	0.38
TC0200000651.mm.1	-1.27	T	Ptgs1	prostaglandin-endoperoxide synthase 1	Multiple_Complex	-14.78	0.0008	0.016	Cassette Exon	0.27
TC1200001485.mm.1	6.72	T	Zfp125	zinc finger protein 125 [Source:MGI Symbol;Acc:MGI:1336211]	Coding	-14.78	3.29e-06	0.0002
TC0700000241.mm.1	-4.79	T	Gng8	guanine nucleotide binding protein (G protein), gamma 8	Coding	-14.73	4.16e-08	8.37e-06
TC1900001254.mm.1	-1.25	T	1110059E24Rik	RIKEN cDNA 1110059E24 gene	Multiple_Complex	-14.73	0.0006	0.0128
TC1800001742.mm.1	-1.28	T	9630014M24Rik; Arhgap26	RIKEN cDNA 9630014M24 gene; Rho GTPase activating protein 26	Multiple_Complex	-14.73	0.0069	0.076
TC0400003653.mm.1	13.22	T	Epb41	erythrocyte membrane protein band 4.1	Multiple_Complex	-14.72	0.0001	0.004
TC1500001890.mm.1	-2.74	T	Cbx7	chromobox 7	Multiple_Complex	-14.71	2.09e-05	0.001
TC0900000609.mm.1	4.61	T	Ppp2r1b	protein phosphatase 2, regulatory subunit A, beta; protein phosphatase 2 (formerly 2A), regulatory subunit A (PR 65), beta isoform	Multiple_Complex	-14.71	0.0157	0.1307
TC0500003410.mm.1	3.95	T	Ywhag	tyrosine 3-monooxygenase/tryptophan 5-monooxygenase activation protein, gamma polypeptide; tyrosine 3-monooxygenase/tryptophan 5-monooxygenase activation protein, gamma polypeptide (Ywhag), mRNA.	Multiple_Complex	-14.69	0.001	0.0192
TC1700002583.mm.1	4.31	T	Srsf7	serine/arginine-rich splicing factor 7	Multiple_Complex	-14.68	5.1e-06	0.0003	Intron Retention	0.46
TC0200001042.mm.1	15.24	T	Dlx1	distal-less homeobox 1	Multiple_Complex	-14.67	0.0002	0.0057
TC0600001342.mm.1	-7.76	T	Ninj2	ninjurin 2	Coding	-14.67	9.24e-12	1.76e-08
TC0700002260.mm.1	-1.5	T	Vmn2r-ps46	vomeronasal 2, receptor, pseudogene 46	Pseudogene	-14.67	0.0019	0.0308
TC0600000245.mm.1	-2.23	T	Ahcyl2	S-adenosylhomocysteine hydrolase-like 2	Multiple_Complex	-14.63	6.08e-05	0.0023
TC0400003077.mm.1	10.84	T	Gm12703; RP23-135A21.4	predicted gene 12703 [Source:MGI Symbol;Acc:MGI:3650667]; Novel Transcript	NonCoding	-14.63	0.0023	0.0345
TC1800000343.mm.1	1.59	T	Ik	IK cytokine	Coding	-14.62	0.0062	0.0702	Intron Retention	0.37
TC0X00001276.mm.1	15.06	T	Cenpi	centromere protein I	Multiple_Complex	-14.6	4.4e-05	0.0018
TC0X00003075.mm.1	-2.7	T	Tsc22d3	TSC22 domain family, member 3	Multiple_Complex	-14.59	8e-06	0.0005
TC1900001101.mm.1	1.29	T			NonCoding	-14.56	0.0008	0.016
TC1500001192.mm.1	11.09	T	Skp2	S-phase kinase-associated protein 2 (p45); S-phase kinase-associated protein 2 (p45) (Skp2), transcript variant 1, mRNA.	Multiple_Complex	-14.56	0.0009	0.0184	Alternative 3' Acceptor Site	0.23
TC1000001840.mm.1	11.03	T	Myb	myeloblastosis oncogene	Multiple_Complex	-14.55	0.0009	0.0179
TC0100003863.mm.1	-1.01	T	Gm16026	predicted pseudogene 16026	Multiple_Complex	-14.54	2.02e-10	1.5e-07
TC0100001703.mm.1	-4.23	T	Cdc42bpa	CDC42 binding protein kinase alpha	Multiple_Complex	-14.53	0.0002	0.0052	Cassette Exon	0.45
TC0700004076.mm.1	-8.77	T	St5	suppression of tumorigenicity 5	Multiple_Complex	-14.53	0.0003	0.0081	Cassette Exon	0.27
TC0800002349.mm.1	-4.1	T	Csgalnact1	chondroitin sulfate N-acetylgalactosaminyltransferase 1	Multiple_Complex	-14.5	3.33e-07	4.15e-05	Cassette Exon	0.26
TC1600001352.mm.1	-2.61	T	Clcn2	chloride channel, voltage-sensitive 2; chloride channel 2	Multiple_Complex	-14.49	0.0001	0.0038
TC1700000464.mm.1	-1.5	T	Pacsin1	protein kinase C and casein kinase substrate in neurons 1; protein kinase C and casein kinase substrate in neurons 1 (Pacsin1), transcript variant 1, mRNA.	Multiple_Complex	-14.49	9.66e-06	0.0006
TC0400000485.mm.1	-7.31	T	Frmpd1	FERM and PDZ domain containing 1	Coding	-14.48	2.97e-06	0.0002
TC0500001757.mm.1	2.07	T	Trrap	transformation/transcription domain-associated protein	Multiple_Complex	-14.47	1.72e-05	0.0009	Alternative 3' Acceptor Site	0.3
TC0400000961.mm.1	-2.99	T	Fggy	FGGY carbohydrate kinase domain containing	Multiple_Complex	-14.47	0.0066	0.0735
TC0700000300.mm.1	-1.09	T	Ercc2; Mir343	excision repair cross-complementing rodent repair deficiency, complementation group 2; microRNA 343	Multiple_Complex	-14.46	0.0002	0.0051
TC0700002231.mm.1	-1.72	T	Vmn2r31	vomeronasal 2, receptor 31	Coding	-14.45	0.0443	0.2511
TC0100001037.mm.1	1.38	T	Cdh7	cadherin 7, type 2	Multiple_Complex	-14.4	0.0002	0.0049
TC0800003043.mm.1	-1.08	T			NonCoding	-14.4	0.0007	0.0142
TC0300002272.mm.1	3.4	T			NonCoding	-14.37	1.1e-06	0.0001
TC0400001677.mm.1	-9.06	T	Id3	inhibitor of DNA binding 3	Multiple_Complex	-14.36	3.81e-06	0.0003
TC0300001497.mm.1	-66.66	T	Ttll7	tubulin tyrosine ligase-like family, member 7 (Ttll7), mRNA.; tubulin tyrosine ligase-like family, member 7	Multiple_Complex	-14.36	4.34e-05	0.0018	Cassette Exon	0.29
TC0500002221.mm.1	-4.74	T	Tmem129	transmembrane protein 129	Coding	-14.35	0.0001	0.004
TC1000000171.mm.1	-2.04	T	Sgk1	serum/glucocorticoid regulated kinase 1	Multiple_Complex	-14.33	0.0133	0.1175
TC0300000916.mm.1	12.22	T	Anp32e	acidic (leucine-rich) nuclear phosphoprotein 32 family, member E	Multiple_Complex	-14.32	0.0003	0.0077	Alternative 3' Acceptor Site	0.23
TC1900001194.mm.1	1.12	T			NonCoding	-14.32	2.02e-07	2.83e-05
TC0300001295.mm.1	-1.29	T	9830132P13Rik	RIKEN cDNA 9830132P13 gene	NonCoding	-14.31	0.0187	0.1465
TC0200003401.mm.1	1.29	T	Strbp	spermatid perinuclear RNA binding protein	Multiple_Complex	-14.31	0.0038	0.0496	Alternative 5' Donor Site	0.25
TC1100003434.mm.1	13.23	T	Brip1	BRCA1 interacting protein C-terminal helicase 1	Multiple_Complex	-14.31	0.0001	0.0034
TC0800003248.mm.1	-1.48	T	1190005I06Rik	RIKEN cDNA 1190005I06 gene	Coding	-14.28	6.35e-07	6.9e-05	Cassette Exon	0.24
TC1200001108.mm.1	-10.43	T	Cyp46a1	cytochrome P450, family 46, subfamily a, polypeptide 1	Coding	-14.26	3.57e-06	0.0003
TC1000002236.mm.1	-22.1	T	Unc5b	unc-5 homolog B (C. elegans)	Multiple_Complex	-14.26	4.86e-05	0.002
TC0200002134.mm.1	1.53	T	Gm11686	predicted gene 11686	Pseudogene	-14.25	2.71e-06	0.0002
TC1200000614.mm.1	-2.26	T	Daam1	dishevelled associated activator of morphogenesis 1; dishevelled associated activator of morphogenesis 1 (Daam1), transcript variant 1, mRNA.; dishevelled associated activator of morphogenesis 1 (Daam1), transcript variant 2, mRNA.	Multiple_Complex	-14.23	9.7e-05	0.0033
TC1300002279.mm.1	28.34	T	Ube2ql1	ubiquitin-conjugating enzyme E2Q family-like 1	Multiple_Complex	-14.22	4.21e-07	5e-05
TC0400003421.mm.1	10.56	T	Ybx1	Y box protein 1	Multiple_Complex	-14.22	1.08e-05	0.0006
TC0700002257.mm.1	-1.55	T	Vmn2r-ps45	vomeronasal 2, receptor, pseudogene 45	Pseudogene	-14.21	0.0081	0.0841
TC0400002551.mm.1	2.28	T	Rnf38	ring finger protein 38	Multiple_Complex	-14.21	0.0004	0.0106
TC0900001254.mm.1	-3.36	T	Dzip1l	DAZ interacting protein 1-like	Multiple_Complex	-14.19	0.0002	0.0058
TC0100000656.mm.1	-5.69	T	Dnajb2	DnaJ (Hsp40) homolog, subfamily B, member 2	Multiple_Complex	-14.19	0.0002	0.0053
TC0600001193.mm.1	-2.93	T	Itpr1	inositol 1,4,5-trisphosphate receptor 1; Synthetic construct Mus musculus clone IMAGE:100069456, MGC:199358 inositol 1,4,5-triphosphate receptor 1 (Itpr1) mRNA, encodes complete protein.	Multiple_Complex	-14.19	7.37e-07	7.73e-05
TC0100000814.mm.1	1.33	T	Gigyf2	GRB10 interacting GYF protein 2	Multiple_Complex	-14.18	1.53e-05	0.0008
TC0700003568.mm.1	-2.17	T	Pex11a	peroxisomal biogenesis factor 11 alpha	Multiple_Complex	-14.16	0.0051	0.0612
TC0100003478.mm.1	11.96	T	Uck2	uridine-cytidine kinase 2	Coding	-14.16	0.0001	0.0045
TC1600001308.mm.1	16.81	T	Ranbp1	RAN binding protein 1	Multiple_Complex	-14.16	0.0003	0.0073
TC0100001498.mm.1	1.07	T	F5	coagulation factor V; Synthetic construct Mus musculus clone IMAGE:100069458, MGC:199360 coagulation factor V (F5) mRNA, encodes complete protein.	Coding	-14.15	0.0051	0.0613
TC0800001639.mm.1	40.03	T	Shcbp1	Shc SH2-domain binding protein 1	Multiple_Complex	-14.15	9.18e-05	0.0032
TC1200000673.mm.1	2.52	T			NonCoding	-14.13	0.0002	0.0048
TC1900000151.mm.1	4.28	T	Snhg1; Snord22	small nucleolar RNA host gene 1; small nucleolar RNA, C/D box 22; small nucleolar RNA host gene (non-protein coding) 1	Multiple_Complex	-14.13	8.51e-06	0.0005
TC0300001242.mm.1	-1.04	T	Abca4	ATP-binding cassette, sub-family A (ABC1), member 4	Multiple_Complex	-14.12	7.94e-10	4.14e-07
TC0700002061.mm.1	1.05	T	Muc2; MUC2	mucin 2; colonic mucin MUC2 (MUC2) mRNA, partial cds.; SubName: Full=Uncharacterized protein; Flags: Fragment;	Multiple_Complex	-14.09	1.41e-08	3.65e-06
TC1100000965.mm.1	-1.95	T	Kif1c; Mir6925	kinesin family member 1C; microRNA 6925; Synthetic construct Mus musculus clone IMAGE:100068089, MGC:195706 kinesin family member 1C (Kif1c) mRNA, encodes complete protein.	Multiple_Complex	-14.09	3.37e-05	0.0015
TC0500003474.mm.1	2.25	T	Taf6	TAF6 RNA polymerase II, TATA box binding protein (TBP)-associated factor	Multiple_Complex	-14.08	0.0002	0.0066	Alternative 5' Donor Site	0.33
TC1500001509.mm.1	10.25	T	Gm10020	predicted pseudogene 10020	Multiple_Complex	-14.07	3.83e-06	0.0003
TC0100001252.mm.1	-3.65	T	Csrp1	cysteine and glycine-rich protein 1	Coding	-14.06	0.0006	0.0124
TC1000001203.mm.1	7.38	T	Poc1b	POC1 centriolar protein homolog B (Chlamydomonas)	Multiple_Complex	-14.05	0.0001	0.0041
TC1000000571.mm.1	12.38	T	Ppa1	pyrophosphatase (inorganic) 1	Multiple_Complex	-14.05	0.0002	0.0066
TC0300002051.mm.1	-1.02	T	P2ry14; F630111L10Rik	purinergic receptor P2Y, G-protein coupled, 14; RIKEN cDNA F630111L10 gene; RIKEN cDNA F630111L10 gene (F630111L10Rik), non-coding RNA.; purinergic receptor P2Y, G-protein coupled, 14 (P2ry14), transcript variant 1, mRNA.; purinergic receptor P2Y, G-protein coupled, 14 (P2ry14), transcript variant 2, mRNA.	Multiple_Complex	-14	0.0005	0.0122
TC0200004229.mm.1	8.15	T	Caprin1	cell cycle associated protein 1	Multiple_Complex	-13.97	4.59e-06	0.0003
TC1300000893.mm.1	-132.93	T	Tppp	tubulin polymerization promoting protein	Multiple_Complex	-13.97	4.34e-05	0.0018
TC0100001302.mm.1	3.11	T	Zbtb41	zinc finger and BTB domain containing 41 homolog	Multiple_Complex	-13.97	0.0046	0.0569
TC1300000607.mm.1	21.63	T	Gadd45g	growth arrest and DNA-damage-inducible 45 gamma	Multiple_Complex	-13.96	0.0017	0.0284	Intron Retention	0.36
TC0800002144.mm.1	-1.96	T	Klkb1; Cyp4v3	kallikrein B, plasma 1; cytochrome P450, family 4, subfamily v, polypeptide 3; kallikrein B, plasma 1 (Klkb1), mRNA.	Coding	-13.95	0.0011	0.0204
TC1200001843.mm.1	-13.68	T	Mdga2; MDGA2	MAM domain containing glycosylphosphatidylinositol anchor 2; MAM domain-containing glycosylphosphatidylinositol anchor protein 2	Multiple_Complex	-13.94	0.0006	0.0129	Cassette Exon	0.21
TC0800002359.mm.1	12.66	T	Lzts1	leucine zipper, putative tumor suppressor 1	Multiple_Complex	-13.94	0.0016	0.0266
TC0200005150.mm.1	-14.87	T	Slc13a3	solute carrier family 13 (sodium-dependent dicarboxylate transporter), member 3	Multiple_Complex	-13.94	0.0018	0.0298
TC1500002056.mm.1	-3.15	T	Arsa	arylsulfatase A	Multiple_Complex	-13.94	6.6e-05	0.0025
TC0700002252.mm.1	-1.47	T	Gm3665	predicted gene 3665 [Source:MGI Symbol;Acc:MGI:3781841]	Pseudogene	-13.93	0.0203	0.1548
TC0900001430.mm.1	-1.42	T	Pfkfb4	6-phosphofructo-2-kinase/fructose-2,6-biphosphatase 4	Multiple_Complex	-13.93	1.39e-06	0.0001
TC1300002001.mm.1	-31.81	T	Gm15440	predicted gene 15440 [Source:MGI Symbol;Acc:MGI:3642353]	Coding	-13.92	2.47e-06	0.0002
TC0700001404.mm.1	-1.88	T	P4ha3	procollagen-proline, 2-oxoglutarate 4-dioxygenase (proline 4-hydroxylase), alpha polypeptide III	Multiple_Complex	-13.84	0.0016	0.0264
TC0100001616.mm.1	9.23	T	Igsf9	immunoglobulin superfamily, member 9	Multiple_Complex	-13.83	8.09e-09	2.39e-06
TC0200003720.mm.1	1.03	T	Slc25a12	solute carrier family 25 (mitochondrial carrier, Aralar), member 12	Multiple_Complex	-13.83	2.68e-06	0.0002	Cassette Exon	0.33
TC0500003470.mm.1	1.7	T	Zfp113	zinc finger protein 113	Multiple_Complex	-13.83	8.54e-05	0.003	Cassette Exon	0.22
TC0900001376.mm.1	-2.83	T	Hyal1; Nat6; Hyal3	hyaluronoglucosaminidase 1; N-acetyltransferase 6; hyaluronoglucosaminidase 3	Multiple_Complex	-13.82	0.0065	0.0725
TC1600001986.mm.1	3.71	T	Cct8	chaperonin containing Tcp1, subunit 8 (theta)	Multiple_Complex	-13.8	0.0009	0.0183
TC0200000352.mm.1	-1.38	T	Apbb1ip	amyloid beta (A4) precursor protein-binding, family B, member 1 interacting protein	Multiple_Complex	-13.78	0.0107	0.1016
TC1200001075.mm.1	1.88	T	Gm19554	PREDICTED: predicted gene, 19554 (Gm19554), miscRNA.	NonCoding	-13.78	3.38e-05	0.0015
TC1100000605.mm.1	-2.54	T	Shroom1	shroom family member 1	Multiple_Complex	-13.77	2.6e-05	0.0012
TC1900000774.mm.1	-1.16	T	Tectb; Mir6715	tectorin beta; microRNA 6715	Multiple_Complex	-13.76	7.93e-06	0.0005
TC0400004186.mm.1	4.64	T	Nfia	nuclear factor I/A	Multiple_Complex	-13.75	4.06e-08	8.19e-06
TC1500001935.mm.1	-7.87	T	Desi1	desumoylating isopeptidase 1	Multiple_Complex	-13.74	0.0004	0.0089	Alternative 3' Acceptor Site	0.34
TC0300003023.mm.1	-1.03	T	Rap1gds1	RAP1, GTP-GDP dissociation stimulator 1; RAP1, GTP-GDP dissociation stimulator 1 (Rap1gds1), transcript variant 1, mRNA.; RAP1, GTP-GDP dissociation stimulator 1 (Rap1gds1), transcript variant 2, mRNA.	Coding	-13.72	0.0079	0.0831
TC1000000736.mm.1	-49.16	T	S100b	S100 protein, beta polypeptide, neural	Coding	-13.72	3.15e-07	3.98e-05
TC1100003808.mm.1	7.64	T	Brca1	breast cancer 1, early onset; breast cancer 1	Multiple_Complex	-13.71	0.0002	0.006
TC1900000415.mm.1	-4.01	T	Vldlr	very low density lipoprotein receptor	Multiple_Complex	-13.71	1.62e-05	0.0008	Cassette Exon	0.48
TC0800001984.mm.1	2.88	T	Nrg1	neuregulin 1; Synthetic construct Mus musculus clone IMAGE:100064088, MGC:193459 neuregulin 1 (Nrg1) mRNA, encodes complete protein.	Multiple_Complex	-13.7	0.0002	0.0064
TC1100000891.mm.1	11.07	T	Ctc1	CTS telomere maintenance complex component 1	Multiple_Complex	-13.7	0.0003	0.0077
TC1900000333.mm.1	-1.57	T	E030003E18Rik	RIKEN cDNA E030003E18 gene; RIKEN cDNA E030003E18 gene (E030003E18Rik), non-coding RNA.	NonCoding	-13.68	1.26e-05	0.0007
TC0600002056.mm.1	-2.26	T	Wdr91	WD repeat domain 91	Multiple_Complex	-13.67	0.0033	0.0448
TC1100000592.mm.1	1.06	T	Vdac1	voltage-dependent anion channel 1	Multiple_Complex	-13.65	0.0001	0.004	Cassette Exon	0.34
TC0400003343.mm.1	15.78	T	Nasp	nuclear autoantigenic sperm protein (histone-binding)	Multiple_Complex	-13.65	1.92e-07	2.72e-05
TC1900001031.mm.1	6.13	T	Stip1	stress-induced phosphoprotein 1	Multiple_Complex	-13.65	0.0123	0.1112
TC1900001017.mm.1	-1.16	T	Rps6ka4; Mir5046	ribosomal protein S6 kinase, polypeptide 4; microRNA 5046; microRNA 5046 (Mir5046), microRNA.	Multiple_Complex	-13.64	4.14e-05	0.0017	Cassette Exon	0.21
TC0700002311.mm.1	18.61	T	Zik1	zinc finger protein interacting with K protein 1	Multiple_Complex	-13.63	0.0046	0.0573
TC0500000381.mm.1	-3.99	T	Add1; Mir7036b	adducin 1 (alpha); microRNA 7036b	Multiple_Complex	-13.63	4.07e-08	8.21e-06
TC0200003174.mm.1	-1.32	T	Ubac1	ubiquitin associated domain containing 1	Multiple_Complex	-13.62	0.0009	0.0175
TC0900003115.mm.1	-2.09	T	Nbeal2; Mir8107	neurobeachin-like 2; microRNA 8107	Multiple_Complex	-13.62	0.0004	0.0102	Alternative 3' Acceptor Site	0.32
TC0600001591.mm.1	-1.82	T	Crebl2	cAMP responsive element binding protein-like 2	Multiple_Complex	-13.62	0.0008	0.0158
TC0500003171.mm.1	-3.51	T	Rita1	RBPJ interacting and tubulin associated 1	Multiple_Complex	-13.61	8.23e-06	0.0005	Cassette Exon	0.26
TC1200002080.mm.1	-1.01	T	Syndig1l	synapse differentiation inducing 1 like	Coding	-13.61	0.0001	0.004
TC1100003860.mm.1	1.2	T	Dcakd	dephospho-CoA kinase domain containing	Multiple_Complex	-13.6	2.84e-05	0.0013	Cassette Exon	0.28
TC0400003422.mm.1	7.94	T	Ppih	peptidyl prolyl isomerase H	Coding	-13.6	1.75e-05	0.0009
TC0X00000666.mm.1	-1	T	Gabrq	gamma-aminobutyric acid (GABA) A receptor, subunit theta	Coding	-13.6	0.0002	0.0055
TC0100001254.mm.1	-1.85	T	Phlda3	pleckstrin homology-like domain, family A, member 3	Multiple_Complex	-13.59	4.29e-09	1.47e-06
TC0700000896.mm.1	-1.88	T	Nav2; Gm2788	neuron navigator 2; predicted gene 2788	Multiple_Complex	-13.58	4.43e-07	5.2e-05	Alternative 3' Acceptor Site	0.21
TC1400002714.mm.1	-2.07	T	Abcc4	ATP-binding cassette, sub-family C (CFTR/MRP), member 4	Coding	-13.58	0.0036	0.0482	Cassette Exon	0.25
TC0900000176.mm.1	1.81	T	Ubl5	ubiquitin-like 5	Multiple_Complex	-13.57	6.99e-07	7.42e-05
TC0500003590.mm.1	1.02	T	Ptcd1	pentatricopeptide repeat domain 1	Coding	-13.57	5.52e-08	1.04e-05
TC1300000618.mm.1	1	T	Gm2762	predicted gene 2762; predicted gene 2762 (Gm2762), non-coding RNA.	NonCoding	-13.57	0.0001	0.0039
TC0900002428.mm.1	-1.12	T	Thsd4	thrombospondin, type I, domain containing 4	Multiple_Complex	-13.56	6.19e-08	1.13e-05
TC1400002073.mm.1	1.06	T	Myh6	myosin, heavy polypeptide 6, cardiac muscle, alpha	Multiple_Complex	-13.55	2.36e-07	3.2e-05
TC1000001183.mm.1	12.53	T	Btg1	B cell translocation gene 1, anti-proliferative	Multiple_Complex	-13.55	8.54e-05	0.003	Cassette Exon	0.23
TC0X00002513.mm.1	-1.53	T	Prrg1	proline rich Gla (G-carboxyglutamic acid) 1; proline rich Gla (G-carboxyglutamic acid) 1 (Prrg1), transcript variant 1, mRNA.	Multiple_Complex	-13.54	0.0013	0.023
TC1300000192.mm.1	21.38	T	Hist1h2bj	histone cluster 1, H2bj	Coding	-13.54	1.53e-07	2.3e-05	Alternative 5' Donor Site	0.23
TC0500000809.mm.1	-1.12	T	Prol1	proline rich, lacrimal 1	Coding	-13.53	7.82e-05	0.0028
TC0500000349.mm.1	4.96	T	Ywhah	tyrosine 3-monooxygenase/tryptophan 5-monooxygenase activation protein, eta polypeptide	Multiple_Complex	-13.53	0.0192	0.149
TC1500000561.mm.1	-1.59	T	Rhpn1	rhophilin, Rho GTPase binding protein 1	Multiple_Complex	-13.53	1.79e-06	0.0002
TC0X00000212.mm.1	1.9	T	Uba1	ubiquitin-like modifier activating enzyme 1	Multiple_Complex	-13.53	0.0403	0.2372
TC1300002059.mm.1	11.74	T	Dbn1	drebrin 1	Multiple_Complex	-13.53	2.83e-06	0.0002
TC0600002714.mm.1	-1.69	T	Cfap100	cilia and flagella associated protein 100	Multiple_Complex	-13.52	0.0003	0.0076
TC1700001187.mm.1	-4.62	T	Vit	vitrin	Multiple_Complex	-13.51	8.39e-06	0.0005	Cassette Exon	0.31
TC1100004067.mm.1	-8.15	T	Hid1	HID1 domain containing	Multiple_Complex	-13.5	0.0016	0.0271
TC1700002162.mm.1	-14.51	T	Vegfa	vascular endothelial growth factor A	Multiple_Complex	-13.49	7.77e-06	0.0005
TC0200004089.mm.1	-1.89	T	Gm13767	predicted gene 13767	Multiple_Complex	-13.49	1.87e-06	0.0002
TC0300001495.mm.1	-1.02	T	Gm16325	predicted gene 16325	NonCoding	-13.49	1.03e-07	1.69e-05
TC1400002151.mm.1	-2.6	T	Zdhhc20	zinc finger, DHHC domain containing 20	Multiple_Complex	-13.49	0.0001	0.0043
TC1100001661.mm.1	1.09	T	Tmem106a	transmembrane protein 106A	Multiple_Complex	-13.49	4.99e-06	0.0003
TC1700001075.mm.1	2.92	T	Ppp4r1	protein phosphatase 4, regulatory subunit 1	Multiple_Complex	-13.48	1.63e-06	0.0001
TC1200001861.mm.1	13.43	T	Pole2	polymerase (DNA directed), epsilon 2 (p59 subunit)	Coding	-13.46	0.0001	0.0041
TC1200000989.mm.1	-1.66	T	Kcnk13	potassium channel, subfamily K, member 13	Coding	-13.43	3.23e-07	4.05e-05
TC0900000458.mm.1	1.21	T	Hspa8; Snord14d; Snord14e; Snord14c	heat shock protein 8; small nucleolar RNA, C/D box 14D; small nucleolar RNA, C/D box 14E; small nucleolar RNA, C/D box 14C	Multiple_Complex	-13.42	0.0223	0.164
TC0800001566.mm.1	-1.08	T	Ntpcr	nucleoside-triphosphatase, cancer-related	Multiple_Complex	-13.42	0.0003	0.0078	Alternative 5' Donor Site	0.25
TC1900000335.mm.1	-2.63	T	Aldh1a1	aldehyde dehydrogenase family 1, subfamily A1	Coding	-13.42	6.31e-07	6.86e-05
TC0600003005.mm.1	1.56	T	Cacna1c	calcium channel, voltage-dependent, L type, alpha 1C subunit	Multiple_Complex	-13.42	0.0022	0.034
TC0400003327.mm.1	-1.61	T	Faah	fatty acid amide hydrolase	Multiple_Complex	-13.41	8.18e-05	0.0029	Cassette Exon	0.31
TC0200003214.mm.1	-1.96	T	Sardh	sarcosine dehydrogenase	Multiple_Complex	-13.41	0.0047	0.0584	Cassette Exon	0.26
TC1400000942.mm.1	-58.55	T	Clu	clusterin	Multiple_Complex	-13.39	1.77e-05	0.0009
TC0200001036.mm.1	14.95	T	Hat1	histone aminotransferase 1	Multiple_Complex	-13.38	0.0054	0.0636
TC1000001216.mm.1	9.91	T	Kitl	kit ligand	Coding	-13.38	8.27e-05	0.003
TC0200003164.mm.1	-7.13	T	Tmem141	transmembrane protein 141	Multiple_Complex	-13.36	3.57e-06	0.0003
TC1200001362.mm.1	-3.92	T	Fam228a	family with sequence similarity 228, member A	Coding	-13.36	0.0028	0.0403
TC0900003097.mm.1	-1.24	T	3000002C10Rik	glyceraldehyde-3-phosphate dehydrogenase pseudogene	Multiple_Complex	-13.35	5.61e-06	0.0004
TC0800002300.mm.1	-2.63	T	Palld	palladin, cytoskeletal associated protein; Synthetic construct Mus musculus clone IMAGE:100068094, MGC:195711 palladin, cytoskeletal associated protein (Palld) mRNA, encodes complete protein.	Multiple_Complex	-13.35	0.0158	0.1313
TC1000002828.mm.1	-2.15	T	Syt1	synaptotagmin I	Multiple_Complex	-13.35	0.0192	0.1491	Cassette Exon	0.29
TC1900001089.mm.1	18.58	T	Incenp	inner centromere protein	Multiple_Complex	-13.34	5.5e-05	0.0022
TC0300002724.mm.1	-1.37	T	Gstm2	glutathione S-transferase, mu 2	Multiple_Complex	-13.34	1.06e-06	0.0001
TC1100001095.mm.1	-1.86	T	Fam57a	family with sequence similarity 57, member A	Multiple_Complex	-13.33	0.0028	0.04
TC1200000603.mm.1	1.84	T	Psma3	proteasome (prosome, macropain) subunit, alpha type 3	Multiple_Complex	-13.32	7.19e-05	0.0026	Intron Retention	0.54
TC0100001381.mm.1	11.82	T	Rgs16	regulator of G-protein signaling 16	Coding	-13.31	0.0002	0.0052
TC0100002576.mm.1	-2.72	T	Tns1	tensin 1; tensin 1 (Tns1), mRNA.	Multiple_Complex	-13.3	0.001	0.0188
TC0100002042.mm.1	-1.1	T	Kcnq5	potassium voltage-gated channel, subfamily Q, member 5; Synthetic construct Mus musculus clone IMAGE:100063281, MGC:191051 potassium voltage-gated channel, subfamily Q, member 5 (Kcnq5) mRNA, encodes complete protein.	Multiple_Complex	-13.28	0.0004	0.0105
TC1300000445.mm.1	-3.74	T	Bmp6	bone morphogenetic protein 6	Coding	-13.25	2.11e-05	0.001
TC0400000390.mm.1	-1.69	T	Gm13308; Gm20878; Gm21586	predicted gene 13308; predicted gene, 20878 (Gm20878), mRNA.; predicted gene, 21586; predicted gene, 20878	Multiple_Complex	-13.24	0.0089	0.0898
TC0700001669.mm.1	18.1	T	Pde3b	phosphodiesterase 3B, cGMP-inhibited	Multiple_Complex	-13.21	6.87e-05	0.0026
TC1500002098.mm.1	1.48	T	Zcrb1	zinc finger CCHC-type and RNA binding motif 1	Multiple_Complex	-13.17	0.0004	0.0088	Alternative 3' Acceptor Site	0.36
TC1800001711.mm.1	12.46	T	Gm7289	predicted gene 7289 [Source:MGI Symbol;Acc:MGI:3644187]	Pseudogene	-13.16	0.0009	0.0171
TC0500001940.mm.1	33.7	T	Gm7332	predicted gene 7332	Multiple_Complex	-13.15	4.21e-11	4.98e-08	Alternative 3' Acceptor Site	0.23
TC1000001737.mm.1	-1.06	T	Stxbp5	syntaxin binding protein 5 (tomosyn)	Multiple_Complex	-13.15	7.66e-05	0.0028
TC0500001447.mm.1	1.28	T	Tmed2	transmembrane emp24 domain trafficking protein 2	Coding	-13.14	0.0003	0.0073
TC1_GL456212_random00000013.mm.1	-1.03	T	Sp110	Sp110 nuclear body protein, mRNA (cDNA clone MGC:49514 IMAGE:4008284), complete cds.; Sp110 nuclear body protein	Coding	-13.13	9.04e-10	4.57e-07
TC1100002023.mm.1	9.64	T	Gm19976	PREDICTED: predicted gene, 19976, transcript variant 6 (Gm19976), miscRNA.; PREDICTED: predicted gene, 19976, transcript variant 8 (Gm19976), miscRNA.	NonCoding	-13.13	0.0268	0.1845
TC1800000282.mm.1	-2	T	Apc	adenomatosis polyposis coli	Multiple_Complex	-13.13	0.0002	0.0051
TC1700001634.mm.1	-1.95	T	Slc9a3r2	solute carrier family 9 (sodium/hydrogen exchanger), member 3 regulator 2	Coding	-13.12	0.0187	0.1466
TC1400000163.mm.1	-2.48	T	Nudt13	nudix (nucleoside diphosphate linked moiety X)-type motif 13	Coding	-13.12	9.23e-06	0.0005
TC0400001774.mm.1	5.27	T	Mfap2	microfibrillar-associated protein 2	Multiple_Complex	-13.12	1.84e-10	1.41e-07
TC0100001943.mm.1	12.8	T	Mybl1	myeloblastosis oncogene-like 1	Multiple_Complex	-13.11	4.12e-05	0.0017
TC0200000365.mm.1	1.12	T	4931423N10Rik	RIKEN cDNA 4931423N10 gene	Coding	-13.11	2.82e-07	3.65e-05
TC0500000640.mm.1	10.7	T	Uchl1	ubiquitin carboxy-terminal hydrolase L1	Multiple_Complex	-13.11	2.46e-05	0.0012	Alternative 3' Acceptor Site	0.23
TC1400000322.mm.1	23.77	T	Nt5dc2	5-nucleotidase domain containing 2; 5'-nucleotidase domain containing 2	Coding	-13.1	0.0015	0.0258
TC0900002528.mm.1	5.88	T			NonCoding	-13.09	0.0065	0.0727
TC0600000980.mm.1	-4.88	T	Tgfa	transforming growth factor alpha	Multiple_Complex	-13.09	3.33e-07	4.15e-05	Cassette Exon	0.26
TC0700003699.mm.1	-176.54	T	Folh1	folate hydrolase 1	Coding	-13.09	8.67e-05	0.0031
TC0700002968.mm.1	11.51	T	Pold1	polymerase (DNA directed), delta 1, catalytic subunit	Multiple_Complex	-13.08	0.0012	0.0224	Intron Retention	0.37
TC0600000914.mm.1	-2.2	T	Loxl3	lysyl oxidase-like 3	Multiple_Complex	-13.08	0.0009	0.0183
TC1900000552.mm.1	-6.52	T	Plce1	phospholipase C, epsilon 1	Multiple_Complex	-13.08	0.0001	0.0037
TC0500003169.mm.1	-5.47	T	Tpcn1	two pore channel 1	Multiple_Complex	-13.07	0.0057	0.0663
TC0100000665.mm.1	-1.4	T	Slc4a3	solute carrier family 4 (anion exchanger), member 3	Multiple_Complex	-13.07	0.0016	0.0265	Alternative 5' Donor Site	0.22
TC0700004153.mm.1	-1.93	T	Plekha7	pleckstrin homology domain containing, family A member 7	Multiple_Complex	-13.06	6.73e-06	0.0004
TC0200000393.mm.1	-12.53	T	Pnpla7	patatin-like phospholipase domain containing 7	Multiple_Complex	-13.06	0.0109	0.1027
TC1100003292.mm.1	1.05	T	Supt6	suppressor of Ty 6	Multiple_Complex	-13.06	1.22e-07	1.93e-05	Cassette Exon	0.33
TC0100002832.mm.1	12.86	T	Pask	PAS domain containing serine/threonine kinase	Multiple_Complex	-13.06	0.0004	0.0099	Alternative 3' Acceptor Site	0.31
TC0600000543.mm.1	-1.27	T	Zfp956; Zfp783	zinc finger protein 956; zinc finger protein 783	Multiple_Complex	-13.05	0.0003	0.0085
TC1800000301.mm.1	12.89	T	Egr1	early growth response 1	Coding	-13.04	5.97e-07	6.56e-05	Alternative 3' Acceptor Site	0.23
TC0600002323.mm.1	-4.53	T	Nod1	nucleotide-binding oligomerization domain containing 1	Coding	-13.03	1.93e-07	2.73e-05
TC0100001853.mm.1	10.21	T	Ints7	integrator complex subunit 7	Multiple_Complex	-13.03	0.001	0.0186
TC1100003776.mm.1	1.32	T	Dnajc7	DnaJ (Hsp40) homolog, subfamily C, member 7	Multiple_Complex	-13.03	5.38e-05	0.0021	Alternative 5' Donor Site	0.26
TC1700000060.mm.1	8.69	T	Dynlt1b	dynein light chain Tctex-type 1B	Multiple_Complex	-13.02	0.0004	0.009
TC0400001766.mm.1	11.68	T	Rcc2	regulator of chromosome condensation 2	Multiple_Complex	-13.02	1.7e-06	0.0001
TC1000002249.mm.1	-1.01	T	Col13a1	collagen, type XIII, alpha 1	Multiple_Complex	-13.02	9.98e-08	1.65e-05
TC0200003109.mm.1	-4.16	T	Hnmt	histamine N-methyltransferase	Coding	-13.02	1.85e-05	0.0009
TC1100000983.mm.1	12.49	T	Fam64a	family with sequence similarity 64, member A	Multiple_Complex	-13.02	2.48e-06	0.0002
TC0900001612.mm.1	6.65	T	Ctnnb1; Mir7090	catenin (cadherin associated protein), beta 1; microRNA 7090	Multiple_Complex	-13.02	0.0048	0.0586	Alternative 3' Acceptor Site	0.25
TC0500003247.mm.1	-1.98	T	Abcb9	ATP-binding cassette, sub-family B (MDR/TAP), member 9	Multiple_Complex	-13.01	1.67e-06	0.0001	Alternative 5' Donor Site	0.39
TC0400000386.mm.1	-1.66	T	Gm3893; 4933409K07Rik	predicted gene 3893; RIKEN cDNA 4933409K07 gene	Multiple_Complex	-13.01	0.0013	0.0238
TC0600002490.mm.1	-1.79	T	Vamp8	vesicle-associated membrane protein 8	Multiple_Complex	-13.01	8.07e-06	0.0005
TC0700001134.mm.1	-1.45	T	Wdr93	WD repeat domain 93	Coding	-13	0.0445	0.2519
TC0800002950.mm.1	-1.31	T	Ldhd	lactate dehydrogenase D	Multiple_Complex	-12.99	2.11e-10	1.56e-07
TC1100003037.mm.1	8.51	T	Chd3	chromodomain helicase DNA binding protein 3; chromodomain helicase DNA binding protein 3 (Chd3), mRNA.	Multiple_Complex	-12.99	8e-05	0.0029
TC1200000336.mm.1	-9.55	T	Dgkb	diacylglycerol kinase, beta	Multiple_Complex	-12.99	0.0004	0.0091
TC1200001421.mm.1	-3.07	T	Vsnl1	visinin-like 1	Coding	-12.98	1.98e-06	0.0002
TC0700001721.mm.1	-2.38	T	Tmem159	transmembrane protein 159	Multiple_Complex	-12.98	1.51e-07	2.27e-05	Cassette Exon	0.3
TC1600001104.mm.1	3.82	T			NonCoding	-12.95	0.0002	0.0062
TC0600001372.mm.1	-1.79	T	A2m	alpha-2-macroglobulin	Multiple_Complex	-12.94	3.21e-06	0.0002
TC1400000810.mm.1	1.77	T	Mphosph8	M-phase phosphoprotein 8	Multiple_Complex	-12.94	0.0205	0.1559
TC1900000409.mm.1	-2.04	T	Smarca2	SWI/SNF related, matrix associated, actin dependent regulator of chromatin, subfamily a, member 2	Multiple_Complex	-12.94	0.0005	0.0107	Cassette Exon	0.39
TC0400003085.mm.1	-1.14	T	Cyp2j13	cytochrome P450, family 2, subfamily j, polypeptide 13	Coding	-12.94	0.0004	0.0096
TC0600000854.mm.1	-15.22	T	Retsat	retinol saturase (all trans retinol 13,14 reductase)	Multiple_Complex	-12.93	9.56e-05	0.0033
TC0400000091.mm.1	9.49	T	Rad54b; Fsbp	RAD54 homolog B (S. cerevisiae); fibrinogen silencer binding protein	Multiple_Complex	-12.93	0.0009	0.0177
TC1800000665.mm.1	6.52	T	Nedd4l	neural precursor cell expressed, developmentally down-regulated gene 4-like	Multiple_Complex	-12.93	3.78e-05	0.0016
TC0700000864.mm.1	-1.1	T	Lmtk3	lemur tyrosine kinase 3	Multiple_Complex	-12.92	3.28e-08	6.92e-06
TC0X00000429.mm.1	2.12	T	Utp14a	UTP14, U3 small nucleolar ribonucleoprotein, homolog A (yeast)	Multiple_Complex	-12.92	5.25e-08	9.97e-06
TC0300003106.mm.1	-1.93	T	Prkacb	protein kinase, cAMP dependent, catalytic, beta	Multiple_Complex	-12.91	0.0075	0.0803
TC1900001562.mm.1	-20.48	T	Scd1	stearoyl-Coenzyme A desaturase 1	Multiple_Complex	-12.91	0.0001	0.0042
TC1100000062.mm.1	-1.38	T	Rhbdd3	rhomboid domain containing 3	Multiple_Complex	-12.9	0.0014	0.0245
TC0X00000454.mm.1	1.01	T	Stk26	serine/threonine kinase 26	Multiple_Complex	-12.9	1.24e-05	0.0007
TC0300000888.mm.1	5.04	T	Vps72	vacuolar protein sorting 72 (yeast)	Multiple_Complex	-12.89	0.0001	0.0041
TC0600002625.mm.1	-15.82	T	1700019G17Rik	RIKEN cDNA 1700019G17 gene	Coding	-12.89	6.07e-05	0.0023
TC1800001375.mm.1	-1.81	T	C330018D20Rik	RIKEN cDNA C330018D20 gene	Multiple_Complex	-12.88	0.008	0.0836
TC0800002437.mm.1	2.19	T	Unc13a	unc-13 homolog A (C. elegans)	Multiple_Complex	-12.88	1.68e-07	2.47e-05
TC0100002998.mm.1	-6.36	T	Nckap5	NCK-associated protein 5	Multiple_Complex	-12.88	0.0022	0.0341
TC0600002796.mm.1	-6.95	T	Eogt	EGF domain-specific O-linked N-acetylglucosamine (GlcNAc) transferase	Multiple_Complex	-12.87	0.001	0.0197
TC0200001760.mm.1	11.92	T	Rad51	RAD51 homolog	Multiple_Complex	-12.86	0.0002	0.0054
TC0900001151.mm.1	1.01	T	4930524O08Rik	RIKEN cDNA 4930524O08 gene; RIKEN cDNA 4930524O08 gene (4930524O08Rik), non-coding RNA.	NonCoding	-12.85	0.0158	0.1312
TC0100003664.mm.1	-1.96	T	Psen2	presenilin 2	Multiple_Complex	-12.84	2.02e-06	0.0002
TC0700000567.mm.1	-1.81	T	Igflr1; U2af1l4	IGF-like family receptor 1; U2 small nuclear RNA auxiliary factor 1-like 4	Multiple_Complex	-12.84	0.0008	0.0169
TC0X00001796.mm.1	-2.66	T	Wdr13	WD repeat domain 13; WD repeat domain 13 (Wdr13), transcript variant 3, non-coding RNA.	Multiple_Complex	-12.83	1.58e-05	0.0008
TC0500000598.mm.1	-3.58	T			NonCoding	-12.83	2.65e-07	3.49e-05	Cassette Exon	0.22
TC0300001061.mm.1	-2.04	T	Ap4b1	adaptor-related protein complex AP-4, beta 1	Coding	-12.83	2.21e-06	0.0002
TC0800001568.mm.1	-1.15	T			NonCoding	-12.83	6.63e-06	0.0004
TC1300000514.mm.1	1.81	T	Jarid2	jumonji, AT rich interactive domain 2	Multiple_Complex	-12.83	0.0005	0.0107	Intron Retention	0.32
TC1100000755.mm.1	1.01	T	Myo15	myosin XV	Multiple_Complex	-12.81	6.26e-06	0.0004
TC1700002823.mm.1	-1.33	T	H2-T10	histocompatibility 2, T region locus 10; histocompatibility 2, T region locus 10 (H2-T10), non-coding RNA.	Multiple_Complex	-12.81	0.0384	0.2302
TC1200002093.mm.1	1.28	T	Nek9	NIMA (never in mitosis gene a)-related expressed kinase 9	Multiple_Complex	-12.8	0.0022	0.0334
TC0200002427.mm.1	-1.52	T	Snhg11	small nucleolar RNA host gene 11	Multiple_Complex	-12.79	0.0171	0.1382
TC0800001728.mm.1	-1.7	T	Grtp1	GH regulated TBC protein 1	Coding	-12.78	8.52e-07	8.66e-05	Cassette Exon	0.25
TC1200002506.mm.1	1.07	T	Dnah11	dynein, axonemal, heavy chain 11	Multiple_Complex	-12.77	0.0033	0.0451
TC0700001950.mm.1	-1.1	T	Fank1	fibronectin type 3 and ankyrin repeat domains 1	Coding	-12.76	3.79e-06	0.0003
TC0100001313.mm.1	-3.77	T	B3galt2	UDP-Gal:betaGlcNAc beta 1,3-galactosyltransferase, polypeptide 2	Multiple_Complex	-12.76	4.63e-06	0.0003
TC0700000466.mm.1	14	T	Ttc9b	tetratricopeptide repeat domain 9B	Coding	-12.75	2.84e-07	3.67e-05	Cassette Exon	0.23
TC0700003005.mm.1	5.76	T	Ruvbl2	RuvB-like protein 2	Coding	-12.74	0.0022	0.0343
TC1300000263.mm.1	-1.07	T	Trim38	tripartite motif-containing 38; tripartite motif-containing 38 (Trim38), mRNA.	Multiple_Complex	-12.74	1.28e-06	0.0001
TC1300001703.mm.1	1.02	T			NonCoding	-12.72	2.3e-08	5.28e-06
TC0400001135.mm.1	5.25	T	Lrp8	low density lipoprotein receptor-related protein 8, apolipoprotein e receptor	Multiple_Complex	-12.71	2.27e-05	0.0011
TC0200000215.mm.1	-30.83	T	Gm13293	predicted gene 13293	NonCoding	-12.7	2.07e-08	4.89e-06
TC1100001015.mm.1	1.11	T	Itgae	integrin alpha E, epithelial-associated	Coding	-12.7	0.0002	0.0056
TC0200000694.mm.1	-1.17	T	Crb2	crumbs family member 2; crumbs homolog 2 (Drosophila)	Multiple_Complex	-12.7	7.38e-06	0.0005	Cassette Exon	0.27
TC1400002515.mm.1	13.87	T	Diaph3	diaphanous related formin 3	Multiple_Complex	-12.7	3.49e-05	0.0015
TC0X00003250.mm.1	1.61	T	Yy2; Mbtps2	Yy2 transcription factor; membrane-bound transcription factor peptidase, site 2	Multiple_Complex	-12.7	0.0007	0.0155	Alternative 3' Acceptor Site	0.26
TC0700002125.mm.1	-2.74	T			NonCoding	-12.69	4.4e-08	8.69e-06
TC0200000821.mm.1	3.39	T	Rif1	Rap1 interacting factor 1 homolog (yeast)	Multiple_Complex	-12.69	0.0011	0.0205
TC0300000457.mm.1	1.94	T	Eif2a	eukaryotic translation initiation factor 2A	Multiple_Complex	-12.68	0.008	0.0834
TC1700001876.mm.1	1.29	T	Rab11b	RAB11B, member RAS oncogene family	Multiple_Complex	-12.66	0.0036	0.0477
TC0600001281.mm.1	1.23	T	Tsen2	tRNA splicing endonuclease 2 homolog (S. cerevisiae)	Multiple_Complex	-12.65	6.62e-08	1.19e-05
TC0200000240.mm.1	13.71	T	Vim	vimentin	Multiple_Complex	-12.65	5.72e-07	6.34e-05	Intron Retention	0.21
TC0700004280.mm.1	-1.29	T	Sh2b1	SH2B adaptor protein 1; SH2B adaptor protein 1 (Sh2b1), transcript variant 2, mRNA.	Multiple_Complex	-12.63	0.001	0.0194	Alternative 3' Acceptor Site	0.25
TC1600000528.mm.1	-1.35	T	Golgb1	golgi autoantigen, golgin subfamily b, macrogolgin 1	Multiple_Complex	-12.63	3.37e-05	0.0015
TC0100000456.mm.1	23.19	T	Nop58	NOP58 ribonucleoprotein	Coding	-12.63	0.0014	0.0239	Cassette Exon	0.23
TC1700000009.mm.1	2.99	T	Tiam2	T cell lymphoma invasion and metastasis 2	Coding	-12.63	0.0022	0.0334	Alternative 5' Donor Site	0.23
TC1000000346.mm.1	-1.19	T	Rnu3a	U3A small nuclear RNA	Multiple_Complex	-12.62	0.0028	0.0404	Alternative 3' Acceptor Site	0.27
TC0800001110.mm.1	1.05	T	Nlrc5; Mir7072	NLR family, CARD domain containing 5; microRNA 7072	Multiple_Complex	-12.57	1.16e-05	0.0007
TC0300002073.mm.1	-2.53	T	E130311K13Rik	RIKEN cDNA E130311K13 gene	Multiple_Complex	-12.56	9.41e-06	0.0006
TC0100000853.mm.1	1.02	T	1700067G17Rik	RIKEN cDNA 1700067G17 gene; RIKEN cDNA 1700067G17 gene (1700067G17Rik), non-coding RNA.	NonCoding	-12.55	5.42e-06	0.0004
TC0800001727.mm.1	2.33	T	Pcid2	PCI domain containing 2	Multiple_Complex	-12.55	0.0015	0.0258
TC0700000658.mm.1	-3.36	T	Rhpn2	rhophilin, Rho GTPase binding protein 2	Multiple_Complex	-12.54	0.0008	0.0157
TC1200002392.mm.1	-1.48	T	Mok	MOK protein kinase	Multiple_Complex	-12.54	0.0003	0.0088	Intron Retention	0.51
TC1500000062.mm.1	-4.46	T	Ranbp3l	RAN binding protein 3-like; RAN binding protein 3-like (Ranbp3l), mRNA.	Coding	-12.54	5.11e-06	0.0003	Cassette Exon	0.24
TC0100001353.mm.1	1.15	T	Trmt1l	tRNA methyltransferase 1 like	Coding	-12.54	3.15e-05	0.0014	Alternative 5' Donor Site	0.3
TC1900000170.mm.1	4.06	T	Eef1g	eukaryotic translation elongation factor 1 gamma	Multiple_Complex	-12.54	1.75e-07	2.53e-05
TC0200000492.mm.1	1.06	T	Ak8	adenylate kinase 8	Multiple_Complex	-12.53	0.0005	0.0123
TC1400002075.mm.1	1.01	T	Myh7	myosin, heavy polypeptide 7, cardiac muscle, beta	Multiple_Complex	-12.53	3.44e-07	4.26e-05
TC0300000277.mm.1	-1.64	T	Gm12532; RP23-243E17.5	predicted gene 12532 [Source:MGI Symbol;Acc:MGI:3650618]; novel transcript (C030047M16RIK)	NonCoding	-12.53	1.03e-07	1.69e-05
TC1600002142.mm.1	-1.05	T	Itgb2l	integrin beta 2-like	Multiple_Complex	-12.52	4.01e-07	4.8e-05
TC1100001832.mm.1	-18.4	T	Arsg	arylsulfatase G	Multiple_Complex	-12.52	5.67e-06	0.0004
TC1900000448.mm.1	-350.17	T	Il33	interleukin 33	Multiple_Complex	-12.52	6.37e-06	0.0004	Cassette Exon	0.31
TC0200005031.mm.1	-2.08	T	D630003M21Rik	RIKEN cDNA D630003M21 gene	Coding	-12.49	1.23e-06	0.0001
TC1900000402.mm.1	-5.66	T	Kank1	KN motif and ankyrin repeat domains 1	Multiple_Complex	-12.49	2.49e-05	0.0012
TC1700001822.mm.1	-6.28	T	Cbs	cystathionine beta-synthase	Multiple_Complex	-12.48	0.0038	0.0502	Alternative 3' Acceptor Site	0.29
TC0900001367.mm.1	-4.21	T	Cacna2d2	calcium channel, voltage-dependent, alpha 2/delta subunit 2	Multiple_Complex	-12.48	0.0005	0.0107
TC0300002203.mm.1	-8.14	T	Tmem144	transmembrane protein 144	Coding	-12.47	4.39e-06	0.0003
TC0500002039.mm.1	1.47	T	Rpl17-ps5	ribosomal protein L17, pseudogene 5	Pseudogene	-12.46	3.01e-05	0.0014	Alternative 3' Acceptor Site	0.27
TC0500003215.mm.1	-1.01	T	Ift81	intraflagellar transport 81	Multiple_Complex	-12.44	1.15e-05	0.0006	Cassette Exon	0.26
TC0200000250.mm.1	1.84	T	Cacnb2	calcium channel, voltage-dependent, beta 2 subunit; calcium channel, voltage-dependent, beta 2 subunit (Cacnb2), transcript variant 3, long non-coding RNA.	Multiple_Complex	-12.43	0.0032	0.0442
TC0700000860.mm.1	-5.5	T	Car11	carbonic anhydrase 11	Multiple_Complex	-12.43	0.0001	0.0046	Cassette Exon	0.23
TC0300001256.mm.1	-1.02	T	Prss12	protease, serine 12 neurotrypsin (motopsin); protease, serine, 12 neurotrypsin (motopsin)	Coding	-12.42	0.0246	0.1747
TC0400003613.mm.1	4.77	T	Khdrbs1	KH domain containing, RNA binding, signal transduction associated 1	Multiple_Complex	-12.41	0.012	0.1095
TC0500002827.mm.1	8.9	T	Hnrnpd	heterogeneous nuclear ribonucleoprotein D	Multiple_Complex	-12.41	0.0002	0.0066
TC1400002337.mm.1	1.03	T	Piwil2	piwi-like RNA-mediated gene silencing 2	Coding	-12.39	0.0116	0.1071
TC0100002203.mm.1	1.71	T	Coa5	cytochrome C oxidase assembly factor 5	Multiple_Complex	-12.38	0.001	0.0194
TC1800000953.mm.1	1.07	T	Mkx	mohawk homeobox	Multiple_Complex	-12.37	3.77e-08	7.7e-06
TC0800002066.mm.1	-4.17	T	Dlc1	deleted in liver cancer 1	Multiple_Complex	-12.36	2.01e-05	0.001	Cassette Exon	0.33
TC0X00001526.mm.1	1.78	T	Huwe1	HECT, UBA and WWE domain containing 1	Multiple_Complex	-12.36	0.002	0.0313	Alternative 5' Donor Site	0.21
TC0400001307.mm.1	-11.84	T	Elovl1	elongation of very long chain fatty acids (FEN1/Elo2, SUR4/Elo3, yeast)-like 1	Multiple_Complex	-12.35	5.66e-06	0.0004
TC0800000539.mm.1	10.67	T	Cenpu	centromere protein U	Multiple_Complex	-12.35	0.001	0.0186
TC1900001388.mm.1	-14.79	T	Asah2	N-acylsphingosine amidohydrolase 2	Multiple_Complex	-12.33	0.0066	0.0737
TC0600001088.mm.1	3.08	T	Lsm3	LSM3 homolog, U6 small nuclear RNA associated (S. cerevisiae)	Multiple_Complex	-12.32	0.0019	0.03	Alternative 5' Donor Site	0.27
TC0300000778.mm.1	1.14	T	Tpm3	tropomyosin 3, gamma	Multiple_Complex	-12.32	0.005	0.0606
TC1000001919.mm.1	-10.99	T	Lama2	laminin, alpha 2; Synthetic construct Mus musculus clone IMAGE:100069455, MGC:199357 laminin, alpha 2 (Lama2) mRNA, encodes complete protein.	Coding	-12.31	0.0007	0.0151
TC0300002906.mm.1	17.73	T	Larp7	La ribonucleoprotein domain family, member 7; Synthetic construct Mus musculus clone IMAGE:100016333, MGC:184518 La ribonucleoprotein domain family, member 7 (Larp7) mRNA, encodes complete protein.	Coding	-12.31	2.52e-06	0.0002
TC1400000120.mm.1	-1.03	T	Nek10	NIMA (never in mitosis gene a)- related kinase 10	Multiple_Complex	-12.31	0.0065	0.0722
TC0300002719.mm.1	-1.15	T			NonCoding	-12.3	7.61e-05	0.0028
TC0200000804.mm.1	-13.44	T	Lypd6	LY6/PLAUR domain containing 6	Multiple_Complex	-12.29	5.99e-05	0.0023
TC0700002037.mm.1	12.49	T	B4galnt4	beta-1,4-N-acetyl-galactosaminyl transferase 4; Synthetic construct Mus musculus clone IMAGE:100069478, MGC:199380 beta-1,4-N-acetyl-galactosaminyl transferase 4 (B4galnt4) mRNA, encodes complete protein.	Coding	-12.26	4.18e-06	0.0003
TC0500001911.mm.1	-1.1	T	Cfap69	cilia and flagella associated protein 69	Coding	-12.26	0.0084	0.0859
TC0800002188.mm.1	-5.16	T	Tenm3	teneurin transmembrane protein 3	Multiple_Complex	-12.25	0.0024	0.0362
TC1800001516.mm.1	1.31	T	4930549G23Rik	RIKEN cDNA 4930549G23 gene; RIKEN cDNA 4930549G23 gene (4930549G23Rik), non-coding RNA.	NonCoding	-12.24	2.66e-09	1.03e-06
TC1500001859.mm.1	-1.11	T	Ankrd54	ankyrin repeat domain 54	Multiple_Complex	-12.23	0.0393	0.2335
TC1400002140.mm.1	-3.16	T	Gm4491	predicted gene 4491 [Source:MGI Symbol;Acc:MGI:3782676]	Coding	-12.22	6.23e-12	1.34e-08
TC1800001193.mm.1	-9.78	T	Hbegf	heparin-binding EGF-like growth factor	Coding	-12.2	0.0001	0.0039
TC0200002474.mm.1	1.37	T	Srsf6	serine/arginine-rich splicing factor 6	Multiple_Complex	-12.19	0.0078	0.0824
TC1600000667.mm.1	-3.06	T	Ccdc80	coiled-coil domain containing 80; Synthetic construct Mus musculus clone IMAGE:100068102, MGC:195719 coiled-coil domain containing 80 (Ccdc80) mRNA, encodes complete protein.	Multiple_Complex	-12.18	8.51e-05	0.003
TC0100003545.mm.1	2.54	T	Gm24871; B930036N10Rik; RP23-116M12.2	predicted gene, 24871 [Source:MGI Symbol;Acc:MGI:5454648]; RIKEN cDNA B930036N10 gene [Source:MGI Symbol;Acc:MGI:3702496]; novel transcript, antisense to Alyref2	Multiple_Complex	-12.17	4.11e-05	0.0017
TC0100003811.mm.1	-2.16	T			NonCoding	-12.16	0.0005	0.0111
TC0200003265.mm.1	-2.64	T	Ccbl1	cysteine conjugate-beta lyase 1	Multiple_Complex	-12.16	0.0007	0.015	Cassette Exon	0.34
TC1700000341.mm.1	-15.8	T	Caskin1	CASK interacting protein 1	Coding	-12.15	0.0014	0.0246
TC0X00000898.mm.1	-1.34	T	Gm14827	predicted gene 14827	NonCoding	-12.15	0.0037	0.049
TC0200004521.mm.1	4.78	T	Myef2; Gm9833	myelin basic protein expression factor 2, repressor; myelin basic protein expression factor 2, repressor pseudogene	Multiple_Complex	-12.15	0.0012	0.022
TC1600000650.mm.1	9.12	T	Naa50	N(alpha)-acetyltransferase 50, NatE catalytic subunit	Multiple_Complex	-12.15	0.0034	0.0461
TC1800000566.mm.1	1.6	T	Phax	phosphorylated adaptor for RNA export	Coding	-12.14	0.03	0.1976
TC1800001063.mm.1	7.75	T	Nol4	nucleolar protein 4	Multiple_Complex	-12.14	2.04e-07	2.85e-05	Alternative 5' Donor Site	0.25
TC0600003346.mm.1	3.41	T	Lmo3	LIM domain only 3	Coding	-12.12	0.0021	0.0323
TC1100000531.mm.1	-4.5	T	Rnf130	ring finger protein 130	Multiple_Complex	-12.12	0.0028	0.04
TC1700001417.mm.1	-1.68	T	6530411M01Rik	RIKEN cDNA 6530411M01 gene	NonCoding	-12.12	2.1e-05	0.001
TC0900001434.mm.1	-4.05	T	Plxnb1	plexin B1	Coding	-12.11	0.0064	0.0721
TC0800000704.mm.1	-1.5	T	Ints10	integrator complex subunit 10	Multiple_Complex	-12.1	9.15e-05	0.0032	Alternative 5' Donor Site	0.23
TC1100000725.mm.1	-1.57	T	4933439C10Rik	RIKEN cDNA 4933439C10 gene	NonCoding	-12.1	0.0328	0.2088
TC1600000491.mm.1	-4.86	T	Adcy5	adenylate cyclase 5	Coding	-12.1	0.0004	0.0097	Alternative 5' Donor Site	0.24
TC0400003888.mm.1	-1.64	T	Plekhm2	pleckstrin homology domain containing, family M (with RUN domain) member 2	Multiple_Complex	-12.1	0.0004	0.0091
TC0300001083.mm.1	-2.4	T	St7l	suppression of tumorigenicity 7-like	Multiple_Complex	-12.09	0.0477	0.2626
TC0500000418.mm.1	-1.66	T	Jakmip1	janus kinase and microtubule interacting protein 1	Multiple_Complex	-12.09	5.8e-05	0.0022	Cassette Exon	0.26
TC0800003099.mm.1	5.83	T	Fanca	Fanconi anemia, complementation group A	Multiple_Complex	-12.07	5.27e-05	0.0021
TC0700001913.mm.1	-352.82	T	Htra1	HtrA serine peptidase 1	Multiple_Complex	-12.07	5.2e-06	0.0004
TC0X00002721.mm.1	-1.47	T	Zmym3	zinc finger, MYM-type 3	Multiple_Complex	-12.06	4.83e-05	0.002
TC1300002302.mm.1	1.1	T	Slc6a18	solute carrier family 6 (neurotransmitter transporter), member 18	Coding	-12.06	3.1e-10	2.04e-07
TC1700002599.mm.1	1.38	T			NonCoding	-12.05	0.0005	0.0121
TC0300003210.mm.1	-2.13	T	Schip1; Gm21949	schwannomin interacting protein 1; predicted gene, 21949	Multiple_Complex	-12.05	0.0064	0.0718
TC0900001475.mm.1	-1.96	T	Als2cl	ALS2 C-terminal like	Multiple_Complex	-12.02	3.2e-05	0.0014	Cassette Exon	0.28
TC0X00001665.mm.1	-1.08	T	Pir	pirin	Multiple_Complex	-12.02	0.0005	0.0122
TC0X00000207.mm.1	13.34	T	Jade3	jade family PHD finger 3	Multiple_Complex	-12.02	0.0002	0.005
TC0100000985.mm.1	1.09	T	Cntnap5b	contactin associated protein-like 5B; Synthetic construct Mus musculus clone IMAGE:100068083, MGC:195700 contactin associated protein-like 5B (Cntnap5b) mRNA, encodes complete protein.	Coding	-12.02	0.0003	0.0072
TC0100002333.mm.1	2.08	T	Asnsd1	asparagine synthetase domain containing 1	Multiple_Complex	-12	0.0312	0.2026
TC0X00002865.mm.1	4.88	T	Rps6ka6	ribosomal protein S6 kinase polypeptide 6	Coding	-12	7.02e-05	0.0026
TC1100001071.mm.1	1.01	T	Scarf1	scavenger receptor class F, member 1	Coding	-12	9.98e-06	0.0006
TC0300002711.mm.1	-1.11	T	Slc6a17	solute carrier family 6 (neurotransmitter transporter), member 17	Multiple_Complex	-11.99	5.9e-06	0.0004	Cassette Exon	0.28
TC1700002324.mm.1	3.43	T	Ptprs	protein tyrosine phosphatase, receptor type, S	Multiple_Complex	-11.99	0.0004	0.0101
TC0800002339.mm.1	-3.17	T	Psd3	pleckstrin and Sec7 domain containing 3	Multiple_Complex	-11.97	0.0178	0.1421
TC1100004147.mm.1	8.88	T	Tk1	thymidine kinase 1	Multiple_Complex	-11.97	4.87e-06	0.0003
TC1800001410.mm.1	-1.03	T	Slc6a7	solute carrier family 6 (neurotransmitter transporter, L-proline), member 7	Coding	-11.97	4.43e-06	0.0003
TC0100003102.mm.1	13.92	T	Btg2	B cell translocation gene 2, anti-proliferative	Coding	-11.96	0.0009	0.0173	Alternative 3' Acceptor Site	0.23
TC1500000099.mm.1	1.53	T	Zfr; Mir1898	zinc finger RNA binding protein; microRNA 1898	Multiple_Complex	-11.96	0.0016	0.0274	Alternative 3' Acceptor Site	0.26
TC0100000216.mm.1	-9.52	T	Dst	dystonin; dystonin (Dst), transcript variant a, mRNA.	Multiple_Complex	-11.95	0.0013	0.0233
TC0800001093.mm.1	-5.56	T	Mt3	metallothionein 3	Coding	-11.94	5.95e-07	6.54e-05
TC0100001724.mm.1	-166.3	T	Tmem63a	transmembrane protein 63a	Multiple_Complex	-11.93	1.97e-05	0.001
TC0200003014.mm.1	-30.99	T			NonCoding	-11.92	3e-09	1.12e-06
TC1400000999.mm.1	-370.38	T	Lgi3	leucine-rich repeat LGI family, member 3	Coding	-11.91	1.08e-05	0.0006
TC0400002977.mm.1	10.09	T	Haus6	HAUS augmin-like complex, subunit 6	Multiple_Complex	-11.91	0.0369	0.2247
TC1200000462.mm.1	1.08	T	Srp54b; Srp54c	signal recognition particle 54B (Srp54b), mRNA.; signal recognition particle 54C; signal recognition particle 54B	Coding	-11.9	5.11e-07	5.81e-05	Cassette Exon	0.22
TC1500000454.mm.1	-1.11	T	Pvt1	plasmacytoma variant translocation 1	NonCoding	-11.89	0.0235	0.1698
TC1100004285.mm.1	-1.79	T	Sfi1	Sfi1 homolog, spindle assembly associated (yeast)	Multiple_Complex	-11.88	0.0008	0.0163	Cassette Exon	0.22
TC1500001095.mm.1	17.42	T	Espl1	extra spindle pole bodies 1, separase; extra spindle poles-like 1 (S. cerevisiae)	Coding	-11.88	0.0102	0.0979
TC0400002587.mm.1	8.29	T	Igfbpl1	insulin-like growth factor binding protein-like 1	Multiple_Complex	-11.88	2.16e-06	0.0002
TC1800001334.mm.1	1.03	T	Lox	lysyl oxidase	Coding	-11.86	0.0009	0.0176
TC1300000887.mm.1	5.36	T	Slc12a7	solute carrier family 12, member 7	Coding	-11.86	0.0134	0.1178	Cassette Exon	0.22
TC1400002260.mm.1	59.12	T	Esco2	establishment of cohesion 1 homolog 2 (S. cerevisiae)	Multiple_Complex	-11.84	0.0017	0.028
TC0200000480.mm.1	1.33	T	Olfm1	olfactomedin 1	Multiple_Complex	-11.83	2.97e-07	3.79e-05
TC1500000666.mm.1	-6.39	T	Micall1	microtubule associated monooxygenase, calponin and LIM domain containing -like 1; microtubule associated monoxygenase, calponin and LIM domain containing -like 1 (Micall1), mRNA.	Coding	-11.83	4.71e-06	0.0003	Cassette Exon	0.27
TC1700000496.mm.1	14.58	T	Cdkn1a	cyclin-dependent kinase inhibitor 1A (P21)	Coding	-11.82	0.0021	0.0325
TC1100002426.mm.1	-1.72	T	Eml6	echinoderm microtubule associated protein like 6	Multiple_Complex	-11.81	0.0002	0.0061
TC1200001787.mm.1	-2.43	T	E030019B13Rik	RIKEN cDNA E030019B13 gene; RIKEN cDNA E030019B13 gene (E030019B13Rik), non-coding RNA.	NonCoding	-11.81	1.84e-05	0.0009	Cassette Exon	0.25
TC0500002947.mm.1	2.68	T	Cplx1	complexin 1	Coding	-11.81	3.81e-05	0.0016
TC1700000705.mm.1	19.5	T	Mdc1	mediator of DNA damage checkpoint 1	Coding	-11.8	0.0146	0.1249
TC1200000651.mm.1	-1.08	T	Gm8075	PREDICTED: predicted gene 8075 (Gm8075), miscRNA.	NonCoding	-11.79	0.0009	0.018
TC0400000057.mm.1	11.94	T	Chd7	chromodomain helicase DNA binding protein 7; chromodomain helicase DNA binding protein 7 (Chd7), mRNA.	Multiple_Complex	-11.79	3.53e-06	0.0003
TC1700001969.mm.1	8.7	T	Tcf19	transcription factor 19	Coding	-11.79	0.0136	0.119
TC0400004177.mm.1	-1.84	T	Akap2	A kinase (PRKA) anchor protein 2	Multiple_Complex	-11.78	7.88e-05	0.0028
TC0400002471.mm.1	-2.92	T	Fam219a	family with sequence similarity 219, member A	Multiple_Complex	-11.78	0.0005	0.0109
TC0500002420.mm.1	8.49	T	Sel1l3	sel-1 suppressor of lin-12-like 3 (C. elegans)	Multiple_Complex	-11.77	0.0005	0.0108
TC0400001544.mm.1	5.5	T	Snrnp40	small nuclear ribonucleoprotein 40 (U5)	Multiple_Complex	-11.77	0.0001	0.0035
TC1200000679.mm.1	-2.02	T	Hspa2	heat shock protein 2	Coding	-11.77	1.18e-09	5.61e-07
TC1400002661.mm.1	-59.41	T	Mir6390	microRNA 6390	Multiple_Complex	-11.76	0.0024	0.036
TC0200002596.mm.1	-1.07	T	9230111E07Rik; Gm14321; RP24-151H6.4; RP24-151H6.3	RIKEN cDNA 9230111E07 gene [Source:MGI Symbol;Acc:MGI:1924998]; predicted gene 14321 [Source:MGI Symbol;Acc:MGI:3701951]; novel transcript (9230111E07Rik); novel transcript	NonCoding	-11.76	0.0013	0.0236	Cassette Exon	0.22
TC0X00002770.mm.1	1.06	T	4930519F16Rik	RIKEN cDNA 4930519F16 gene	Multiple_Complex	-11.75	0.0064	0.0716
TC0200001627.mm.1	-12.67	T	Lgr4	leucine-rich repeat-containing G protein-coupled receptor 4; Synthetic construct Mus musculus clone IMAGE:100064037, MGC:193408 leucine-rich repeat-containing G protein-coupled receptor 4 (Lgr4) mRNA, encodes complete protein.	Multiple_Complex	-11.75	0.001	0.0188
TC0300002344.mm.1	-3.71	T	Efna1	ephrin A1	Coding	-11.74	3.6e-05	0.0016
TC0300002709.mm.1	-17.24	T	Kcnc4	potassium voltage gated channel, Shaw-related subfamily, member 4	Coding	-11.74	1.64e-13	1.22e-09
TC1700000110.mm.1	-5.89	T	Park2	Parkinson disease (autosomal recessive, juvenile) 2, parkin	Multiple_Complex	-11.73	0.0029	0.0407
TC1400001709.mm.1	-1.03	T	Wdfy4	WD repeat and FYVE domain containing 4	Coding	-11.72	0.0144	0.1236
TC0400000011.mm.1	3.18	T	Tgs1	trimethylguanosine synthase homolog (S. cerevisiae)	Multiple_Complex	-11.72	8e-06	0.0005	Alternative 3' Acceptor Site	0.28
TC1100001942.mm.1	-1.01	T	BC018473	cDNA sequence BC018473	NonCoding	-11.71	1.27e-05	0.0007
TC1500000053.mm.1	10.34	T	Nup155	nucleoporin 155	Multiple_Complex	-11.71	0.0105	0.1001
TC1500001987.mm.1	-1.34	T	1810041L15Rik	RIKEN cDNA 1810041L15 gene	Multiple_Complex	-11.71	1.51e-06	0.0001
TC1000002062.mm.1	1.16	T	Foxo3	forkhead box O3; Synthetic construct Mus musculus clone IMAGE:100066315, MGC:195452 forkhead box O3 (Foxo3) mRNA, encodes complete protein.	Multiple_Complex	-11.71	0.0005	0.0114
TC0400003584.mm.1	-1.1	T	Hpca	hippocalcin	Coding	-11.7	3.56e-07	4.38e-05
TC0300003084.mm.1	-1.03	T	Clca1	chloride channel accessory 1	Coding	-11.7	5.44e-06	0.0004
TC1500000031.mm.1	-3.58	T	Dab2	disabled 2, mitogen-responsive phosphoprotein	Multiple_Complex	-11.7	0.0002	0.0049
TC1700001313.mm.1	8.18	T	Msh2	mutS homolog 2 (E. coli)	Multiple_Complex	-11.7	0.003	0.0419	Cassette Exon	0.23
TC0300000732.mm.1	-1.09	T	Arhgef2	rho/rac guanine nucleotide exchange factor (GEF) 2	Multiple_Complex	-11.7	2.89e-06	0.0002
TC1300000524.mm.1	1.37	T			NonCoding	-11.7	1.34e-05	0.0007
TC0200003235.mm.1	1.05	T	1700026L06Rik	RIKEN cDNA 1700026L06 gene	Multiple_Complex	-11.69	0.0017	0.0285
TC0300002901.mm.1	-6.9	T	Ank2	ankyrin 2, brain	Multiple_Complex	-11.69	0.0068	0.075
TC0400003440.mm.1	1.23	T	Nfyc	nuclear transcription factor-Y gamma	Multiple_Complex	-11.69	0.0065	0.0728
TC0500002753.mm.1	-79.82	T	Naaa	N-acylethanolamine acid amidase; N-acylethanolamine acid amidase (Naaa), transcript variant 1, mRNA.	Multiple_Complex	-11.69	0.0049	0.0599
TC0800001459.mm.1	1.17	T			NonCoding	-11.69	0.0002	0.0059
TC1500000901.mm.1	-7.26	T	Cntn1	contactin 1	Multiple_Complex	-11.69	4.99e-05	0.002
TC0600001078.mm.1	-1.72	T	Slc41a3	solute carrier family 41, member 3	Coding	-11.68	0.003	0.0417
TC1500000875.mm.1	4.62	T	Mapk8ip2	mitogen-activated protein kinase 8 interacting protein 2	Coding	-11.68	1.71e-05	0.0009
TC0100003840.mm.1	1.12	T	Camk1g	calcium/calmodulin-dependent protein kinase I gamma	Multiple_Complex	-11.68	0.0119	0.1089
TC1200000524.mm.1	-2.23	T	Prpf39	PRP39 pre-mRNA processing factor 39 homolog (yeast)	Multiple_Complex	-11.67	0.0007	0.0155
TC1700000090.mm.1	-3.38	T	Prr18	proline rich 18; proline rich region 18	Multiple_Complex	-11.67	9.07e-10	4.57e-07
TC1000003117.mm.1	7.58	T	Shmt2	serine hydroxymethyltransferase 2 (mitochondrial)	Coding	-11.66	0.0052	0.0621
TC0900001885.mm.1	-1.27	T	Dock6	dedicator of cytokinesis 6	Coding	-11.65	1.96e-05	0.001	Cassette Exon	0.22
TC1200000211.mm.1	-5.57	T	Kidins220	kinase D-interacting substrate 220	Multiple_Complex	-11.64	0.0315	0.2036
TC0X00001781.mm.1	1	T	Magix	MAGI family member, X-linked	Multiple_Complex	-11.64	1.37e-06	0.0001
TC0900003342.mm.1	11.34	T	Syncrip	synaptotagmin binding, cytoplasmic RNA interacting protein	Multiple_Complex	-11.64	3.11e-09	1.15e-06	Alternative 3' Acceptor Site	0.23
TC0400003284.mm.1	11.86	T	Gm12960	predicted gene 12960	Multiple_Complex	-11.63	2.93e-07	3.76e-05
TC1000003220.mm.1	-5.83	T	Nt5dc3	5-nucleotidase domain containing 3; Synthetic construct Mus musculus clone IMAGE:100069513, MGC:199415 5'-nucleotidase domain containing 3 (Nt5dc3) mRNA, encodes complete protein.; 5'-nucleotidase domain containing 3	Coding	-11.63	0.0027	0.0391
TC0900001419.mm.1	1.9	T	Prkar2a	protein kinase, cAMP dependent regulatory, type II alpha	Multiple_Complex	-11.63	0.0032	0.0443
TC0700000413.mm.1	-1.12	T	Megf8	multiple EGF-like-domains 8	Multiple_Complex	-11.63	0.0002	0.0063
TC1000002528.mm.1	9.48	T	Gm19886	PREDICTED: predicted gene, 19886 (Gm19886), miscRNA.	NonCoding	-11.62	0.0015	0.0254
TC1900001414.mm.1	-1.13	T	Ankrd22	ankyrin repeat domain 22	Multiple_Complex	-11.62	6.11e-11	6.42e-08
TC1600001304.mm.1	-27.92	T	Prodh	proline dehydrogenase	Multiple_Complex	-11.61	0.0006	0.0131
TC1500002198.mm.1	1.85	T			NonCoding	-11.61	2.17e-05	0.0011
TC1100004151.mm.1	1.02	T	Dnah17	dynein, axonemal, heavy chain 17	Coding	-11.59	5.17e-09	1.7e-06
TC0900002113.mm.1	-58.29	T	Sorl1	sortilin-related receptor, LDLR class A repeats-containing; Synthetic construct Mus musculus clone IMAGE:100069522, MGC:199424 sortilin-related receptor, LDLR class A repeats-containing (Sorl1) mRNA, encodes complete protein.	Multiple_Complex	-11.59	1.23e-06	0.0001	Cassette Exon	0.24
TC0100002154.mm.1	1.08	T	Prss40	protease, serine 40; protease, serine, 40	Coding	-11.58	1.55e-06	0.0001	Alternative 3' Acceptor Site	0.3
TC0100001717.mm.1	2.84	T	Gm17275	predicted gene, 17275	NonCoding	-11.58	0.0012	0.0222
TC1400002476.mm.1	1.13	T	Dgkh	diacylglycerol kinase, eta; diacylglycerol kinase, eta (Dgkh), transcript variant 2, non-coding RNA.	Multiple_Complex	-11.58	1.74e-05	0.0009
TC1300001819.mm.1	1.02	T			NonCoding	-11.57	0.0003	0.0081
TC1100002406.mm.1	-1.99	T	Ccdc85a	coiled-coil domain containing 85A; coiled-coil domain containing 85A (Ccdc85a), transcript variant 3, mRNA.	Multiple_Complex	-11.56	8.12e-05	0.0029	Alternative 3' Acceptor Site	0.36
TC1800000071.mm.1	1.11	T	Thoc1	THO complex 1	Multiple_Complex	-11.55	0.0192	0.1491
TC1400002267.mm.1	-1.32	T	Ptk2b	PTK2 protein tyrosine kinase 2 beta	Multiple_Complex	-11.55	0.0059	0.0684	Cassette Exon	0.21
TC0X00000220.mm.1	1	T			NonCoding	-11.54	0.0022	0.0338	Alternative 3' Acceptor Site	0.27
TC1400002844.mm.1	16.91	T	Gm3591	predicted gene 3591	Coding	-11.53	0.0018	0.029
TC0100002501.mm.1	-1.01	T			NonCoding	-11.53	0.0039	0.0506
TC1100002841.mm.1	-1	T	Obscn	obscurin, cytoskeletal calmodulin and titin-interacting RhoGEF	Coding	-11.51	0.004	0.052
TC0500000307.mm.1	9.52	T	Cad; Mir6369	carbamoyl-phosphate synthetase 2, aspartate transcarbamylase, and dihydroorotase; microRNA mir-6369 (Mir6369), microRNA.	Multiple_Complex	-11.51	0.0341	0.214
TC1700001388.mm.1	10.62	T	Dynlt1f; Dynlt1c	dynein light chain Tctex-type 1F; dynein light chain Tctex-type 1C (Dynlt1c), mRNA.	Multiple_Complex	-11.51	0.0002	0.0057	Intron Retention	0.37
TC0100003128.mm.1	5.47	T	Ipo9	importin 9	Multiple_Complex	-11.5	0.0021	0.0324
TC0700002989.mm.1	-4.55	T	Fcgrt	Fc receptor, IgG, alpha chain transporter	Multiple_Complex	-11.5	0.0011	0.0201
TC1400001314.mm.1	10.29	T	Ipo5	importin 5	Multiple_Complex	-11.5	0.0031	0.043
TC0200000574.mm.1	-1.29	T	Golga2	golgi autoantigen, golgin subfamily a, 2	Multiple_Complex	-11.49	0.0172	0.139
TC1100001950.mm.1	-1.42	T	Snhg20; Mir6516	small nucleolar RNA host gene 20; microRNA 6516	Multiple_Complex	-11.49	0.0011	0.0208
TC0300000928.mm.1	-8.29	T	Sv2a	synaptic vesicle glycoprotein 2 a	Multiple_Complex	-11.49	1.08e-06	0.0001
TC1200001324.mm.1	4.87	T	Cdca7l	cell division cycle associated 7 like	Multiple_Complex	-11.48	6.65e-09	2.05e-06
TC1000000131.mm.1	-1.86	T	Nhsl1	NHS-like 1	Multiple_Complex	-11.48	0.0042	0.0536
TC1900000350.mm.1	11.78	T	Tmem2	transmembrane protein 2; transmembrane protein 2 (Tmem2), transcript variant 2, mRNA.	Multiple_Complex	-11.46	0.0001	0.0043	Alternative 3' Acceptor Site	0.24
TC0200005467.mm.1	-4.91	T	Phyhd1	phytanoyl-CoA dioxygenase domain containing 1; phytanoyl-CoA dioxygenase domain containing 1 (Phyhd1), transcript variant 2, mRNA.	Multiple_Complex	-11.46	0.0006	0.0139	Cassette Exon	0.35
TC0200003151.mm.1	-190.89	T	Ptgds	prostaglandin D2 synthase (brain)	Multiple_Complex	-11.45	1.56e-06	0.0001
TC0600000665.mm.1	1.06	T	Ghrhr	growth hormone releasing hormone receptor	Coding	-11.45	6.01e-08	1.11e-05
TC1800000249.mm.1	-4.75	T	Lims2	LIM and senescent cell antigen like domains 2	Coding	-11.44	0.0081	0.0845
TC1000000147.mm.1	-1.97	T	Map3k5	mitogen-activated protein kinase kinase kinase 5	Multiple_Complex	-11.43	1.47e-05	0.0008	Cassette Exon	0.23
TC1600001592.mm.1	4.94	T	Gtf2e1	general transcription factor II E, polypeptide 1 (alpha subunit)	Multiple_Complex	-11.43	0.0165	0.1352	Alternative 5' Donor Site	0.21
TC1900000114.mm.1	-2.81	T	Map4k2	mitogen-activated protein kinase kinase kinase kinase 2	Multiple_Complex	-11.42	0.0002	0.0068
TC0800000759.mm.1	10.23	T	Lsm4	LSM4 homolog, U6 small nuclear RNA associated (S. cerevisiae)	Multiple_Complex	-11.41	0.0001	0.0044	Alternative 3' Acceptor Site	0.23
TC0300003216.mm.1	1.92	T	Hist2h3c1; Hist2h3c2; Hist2h3b	histone cluster 2, H3c1; histone cluster 2, H3c2, mRNA (cDNA clone MGC:164119 IMAGE:40130765), complete cds.; histone cluster 2, H3c2, mRNA (cDNA clone MGC:164121 IMAGE:40130767), complete cds.; Synthetic construct Mus musculus clone IMAGE:100063598, MGC:191106 histone cluster 2, H3b (Hist2h3b) mRNA, encodes complete protein.	Coding	-11.41	0.0001	0.0043	Alternative 5' Donor Site	0.27
TC1300000135.mm.1	-2.53	T	Amph	amphiphysin; amphiphysin (Amph), mRNA.	Coding	-11.4	0.0003	0.0069
TC0700001273.mm.1	1.12	T	E230029C05Rik	RIKEN cDNA E230029C05 gene (E230029C05Rik), long non-coding RNA.; RIKEN cDNA E230029C05 gene; RIKEN cDNA E230029C05 gene (E230029C05Rik), non-coding RNA.	Multiple_Complex	-11.39	0.0136	0.1191
TC0800000323.mm.1	1.29	T	Whsc1l1	Wolf-Hirschhorn syndrome candidate 1-like 1 (human); Synthetic construct Mus musculus clone IMAGE:100068126, MGC:195743 Wolf-Hirschhorn syndrome candidate 1-like 1 (human) (Whsc1l1) mRNA, encodes complete protein.	Multiple_Complex	-11.36	0.0073	0.0786
TC1900000054.mm.1	1.1	T	Rin1	Ras and Rab interactor 1	Coding	-11.36	6.5e-07	7.02e-05
TC1800000438.mm.1	7.16	T	Tcerg1	transcription elongation regulator 1 (CA150); transcription elongation regulator 1 (CA150) (Tcerg1), mRNA.	Multiple_Complex	-11.35	0.0008	0.0164
TC0400001256.mm.1	-2	T	Ccdc17	coiled-coil domain containing 17	Multiple_Complex	-11.35	0.0003	0.0071
TC0700001005.mm.1	-2.02	T	Ttc23	tetratricopeptide repeat domain 23	Multiple_Complex	-11.34	0.0009	0.0174
TC0200002757.mm.1	-3.3	T	Phactr3	phosphatase and actin regulator 3	Multiple_Complex	-11.34	4.73e-05	0.0019	Cassette Exon	0.28
TC1000002580.mm.1	-1.31	T	Slc41a2	solute carrier family 41, member 2	Multiple_Complex	-11.34	0.0001	0.0039
TC0500003713.mm.1	-3.06	T	Ccdc62	coiled-coil domain containing 62	Multiple_Complex	-11.33	9.5e-05	0.0033	Cassette Exon	0.23
TC1900000141.mm.1	-54.61	T	Pla2g16	phospholipase A2, group XVI	Multiple_Complex	-11.33	3.75e-05	0.0016
TC0400002460.mm.1	8.45	T	Ubap2	ubiquitin-associated protein 2	Multiple_Complex	-11.33	2.66e-05	0.0012
TC0100001678.mm.1	-1.16	T	Gm16432	predicted gene 16432	Multiple_Complex	-11.33	0.0039	0.0509
TC0400001538.mm.1	-3.33	T	Adgrb2	adhesion G protein-coupled receptor B2	Multiple_Complex	-11.32	1.7e-05	0.0009
TC0100001605.mm.1	1.82	T	Copa	coatomer protein complex subunit alpha	Multiple_Complex	-11.32	0.0135	0.1186	Intron Retention	0.37
TC1700002629.mm.1	2.39	T	Cox7a2l	cytochrome c oxidase subunit VIIa polypeptide 2-like	Coding	-11.32	0.0063	0.071	Cassette Exon	0.2
TC1500002249.mm.1	-1.21	T	Cela1	chymotrypsin-like elastase family, member 1	Coding	-11.32	3.92e-07	4.72e-05
TC0600001292.mm.1	52.82	T	Gm8203	predicted pseudogene 8203	Multiple_Complex	-11.32	6.9e-07	7.34e-05
TC0900003333.mm.1	-5.86	T	Nphp3	nephronophthisis 3 (adolescent)	Multiple_Complex	-11.31	4.85e-05	0.002
TC1500000591.mm.1	-1.29	T	Mroh1; Mir6954	maestro heat-like repeat family member 1; microRNA 6954	Multiple_Complex	-11.31	1.24e-10	1.06e-07	Cassette Exon	0.2
TC1300002093.mm.1	25.35	T	Hnrnpa0	heterogeneous nuclear ribonucleoprotein A0	Multiple_Complex	-11.31	3.55e-07	4.37e-05	Alternative 3' Acceptor Site	0.23
TC1600001256.mm.1	3.39	T	Spidr	scaffolding protein involved in DNA repair; scaffolding protein involved i DNA repair	Coding	-11.31	0.0003	0.0072
TC1700002801.mm.1	-1.81	T	Rhbdl1	rhomboid, veinlet-like 1 (Drosophila)	Coding	-11.3	1.31e-07	2.03e-05	Cassette Exon	0.23
TC1100001969.mm.1	1.02	T	Tmc8	transmembrane channel-like gene family 8	Multiple_Complex	-11.3	0.0004	0.009
TC1100003841.mm.1	-1.38	T	Gpatch8	G patch domain containing 8	Multiple_Complex	-11.3	0.0022	0.0336
TC1500000392.mm.1	-2.08	T	Deptor	DEP domain containing MTOR-interacting protein	Multiple_Complex	-11.3	4.86e-05	0.002	Alternative 3' Acceptor Site	0.25
TC1000001490.mm.1	-1.08	T	Wif1	Wnt inhibitory factor 1	Multiple_Complex	-11.3	2.59e-08	5.78e-06
TC1100002127.mm.1	-1.2	T	Emid1	EMI domain containing 1	Multiple_Complex	-11.29	1.31e-05	0.0007
TC0200004979.mm.1	-1.61	T	6430550D23Rik	RIKEN cDNA 6430550D23 gene	Multiple_Complex	-11.28	0.0016	0.0264
TC0700003823.mm.1	-91.63	T	Plekhb1	pleckstrin homology domain containing, family B (evectins) member 1	Multiple_Complex	-11.26	5.35e-06	0.0004
TC1000002267.mm.1	2.28	T	Ccar1	cell division cycle and apoptosis regulator 1	Multiple_Complex	-11.24	0.0001	0.0042
TC0700003486.mm.1	3.5	T	Rpl17-ps10; Gm10294	ribosomal protein L17, pseudogene 10 [Source:MGI Symbol;Acc:MGI:3642871]; predicted pseudogene 10294	Pseudogene	-11.24	1.76e-05	0.0009
TC1300001447.mm.1	1.05	T	Actn2	actinin alpha 2	Coding	-11.24	2.55e-07	3.39e-05	Alternative 3' Acceptor Site	0.27
TC1600000284.mm.1	1.78	T	Ece2	endothelin converting enzyme 2	Multiple_Complex	-11.23	5.95e-05	0.0023
TC1100000853.mm.1	1.02	T	Myh2	myosin, heavy polypeptide 2, skeletal muscle, adult	Multiple_Complex	-11.22	1.07e-07	1.74e-05
TC0200002157.mm.1	-6.71	T	Slc24a3	solute carrier family 24 (sodium/potassium/calcium exchanger), member 3	Multiple_Complex	-11.21	0.0036	0.0484
TC0700002216.mm.1	-5.19	T	Zim1	zinc finger, imprinted 1	Coding	-11.21	0.0003	0.008	Cassette Exon	0.26
TC0700002749.mm.1	6.82	T	Wdr62	WD repeat domain 62	Multiple_Complex	-11.2	0.0002	0.0065
TC1200000282.mm.1	-2.27	T	Sypl	synaptophysin-like protein	Multiple_Complex	-11.2	7.18e-05	0.0026	Alternative 3' Acceptor Site	0.26
TC1000001809.mm.1	-1.22	T	Arfgef3	ARFGEF family member 3	Multiple_Complex	-11.19	0.0078	0.0823
TC1800001625.mm.1	2.56	T	Rnf165	ring finger protein 165	Multiple_Complex	-11.18	0.0012	0.022
TC0200000036.mm.1	11.52	T	Sephs1	selenophosphate synthetase 1	Multiple_Complex	-11.16	1.82e-05	0.0009	Alternative 3' Acceptor Site	0.23
TC0200001201.mm.1	2.48	T	Zc3h15	zinc finger CCCH-type containing 15	Multiple_Complex	-11.16	0.0292	0.1944
TC0700003985.mm.1	-1.21	T	Arfip2	ADP-ribosylation factor interacting protein 2	Multiple_Complex	-11.16	0.0141	0.1216
TC0400004170.mm.1	-3.14	T	Agrn	agrin	Multiple_Complex	-11.16	0.0074	0.0793	Intron Retention	0.32
TC1400000765.mm.1	-8.07	T			NonCoding	-11.15	5.38e-11	5.85e-08
TC0500001113.mm.1	-3.4	T	Fgfrl1	fibroblast growth factor receptor-like 1	Coding	-11.15	0.0045	0.0564	Cassette Exon	0.31
TC0X00002084.mm.1	-1.79	T	Tmem255a	transmembrane protein 255A	Multiple_Complex	-11.15	0.0064	0.0717
TC0200001204.mm.1	-1.78	T	Fam171b	family with sequence similarity 171, member B	Multiple_Complex	-11.15	0.0011	0.0212	Alternative 3' Acceptor Site	0.26
TC0400001715.mm.1	-1.18	T	Eif4g3	eukaryotic translation initiation factor 4 gamma, 3	Multiple_Complex	-11.15	0.0028	0.04
TC0X00000934.mm.1	11.74	T	Efnb1	ephrin B1	Multiple_Complex	-11.13	7.39e-07	7.74e-05
TC1100004100.mm.1	7.95	T	H3f3b	H3 histone, family 3B	Multiple_Complex	-11.13	8.81e-09	2.55e-06	Cassette Exon	0.32
TC0500001021.mm.1	-2.04	T	Dmp1	dentin matrix protein 1	Coding	-11.12	0.0003	0.0074
TC1700001686.mm.1	1.19	T	Rab11fip3	RAB11 family interacting protein 3 (class II)	Multiple_Complex	-11.1	0.0004	0.01	Alternative 3' Acceptor Site	0.25
TC0400004164.mm.1	-3.79	T	Gm10560	predicted gene 10560; predicted gene 10560 (Gm10560), non-coding RNA.	NonCoding	-11.1	0.0029	0.0411	Intron Retention	0.38
TC1800001138.mm.1	2.06	T	Stard4	StAR-related lipid transfer (START) domain containing 4	Multiple_Complex	-11.08	0.0007	0.0153
TC0600002484.mm.1	6.49	T	Usp39	ubiquitin specific peptidase 39	Multiple_Complex	-11.08	0.0004	0.0096
TC0200001947.mm.1	2.64	T	Polr1b	polymerase (RNA) I polypeptide B	Multiple_Complex	-11.08	0.0232	0.1682
TC1500000037.mm.1	-1.06	T	Fyb	FYN binding protein; FYN binding protein (Fyb), mRNA.	Multiple_Complex	-11.08	0.041	0.2394
TC0100003832.mm.1	1.89	T	Syt14	synaptotagmin XIV; Synthetic construct Mus musculus clone IMAGE:100064099, MGC:193470 synaptotagmin XIV (Syt14) mRNA, encodes complete protein.	Coding	-11.08	0.0004	0.0106
TC1000000404.mm.1	1.05	T	F830002L21Rik	RIKEN cDNA F830002L21 gene	Multiple_Complex	-11.08	0.0041	0.0524
TC0700004292.mm.1	-1.51	T	Slx1b	SLX1 structure-specific endonuclease subunit homolog B (S. cerevisiae)	Multiple_Complex	-11.08	3.91e-07	4.7e-05
TC1000002583.mm.1	2.13	T	Aldh1l2	aldehyde dehydrogenase 1 family, member L2	Multiple_Complex	-11.06	5.53e-06	0.0004
TC0400001714.mm.1	-7.68	T	Ece1	endothelin converting enzyme 1	Multiple_Complex	-11.06	0.0014	0.0249
TC0900001442.mm.1	11.79	T	Cdc25a	cell division cycle 25A	Coding	-11.04	7.29e-06	0.0005
TC0800000449.mm.1	-8.78	T	6430573F11Rik	RIKEN cDNA 6430573F11 gene	Multiple_Complex	-11.03	3.24e-06	0.0002	Alternative 5' Donor Site	0.24
TC0200001013.mm.1	6.45	T	Ssb	Sjogren syndrome antigen B	Multiple_Complex	-11.03	4.63e-06	0.0003	Alternative 3' Acceptor Site	0.21
TC1100002804.mm.1	-1.77	T	2010001A14Rik; RP23-268K22.2	RIKEN cDNA 2010001A14 gene [Source:MGI Symbol;Acc:MGI:1923766]; novel transcript	NonCoding	-11.02	5.72e-06	0.0004
TC1300001094.mm.1	-1.05	T			NonCoding	-11.02	0.0004	0.0095
TC1100002466.mm.1	4.96	T	LOC100862121	PREDICTED: uncharacterized LOC100862121 (LOC100862121), miscRNA.	NonCoding	-11	0.0071	0.077
TC0400003437.mm.1	5.06	T	Ctps	cytidine 5-triphosphate synthase; cytidine 5'-triphosphate synthase	Multiple_Complex	-11	0.0047	0.0578
TC1700002154.mm.1	-1.09	T	Capn11	calpain 11; Synthetic construct Mus musculus clone IMAGE:100016544, MGC:184590 calpain 11 (Capn11) mRNA, encodes complete protein.	Coding	-11	5.61e-06	0.0004
TC0100000836.mm.1	-1.81	T	Ugt1a2; Ugt1a6a; Ugt1a6b; Ugt1a10; Ugt1a7c; Ugt1a5; Ugt1a9; Ugt1a1	UDP glucuronosyltransferase 1 family, polypeptide A2; UDP glucuronosyltransferase 1 family, polypeptide A6A; UDP glucuronosyltransferase 1 family, polypeptide A6B; UDP glycosyltransferase 1 family, polypeptide A10; UDP glucuronosyltransferase 1 family, polypeptide A7C; UDP glucuronosyltransferase 1 family, polypeptide A5; UDP glucuronosyltransferase 1 family, polypeptide A9; UDP glucuronosyltrans…	Multiple_Complex	-10.98	4.55e-05	0.0019
TC1500001534.mm.1	14.18	T	Dscc1	defective in sister chromatid cohesion 1 homolog (S. cerevisiae)	Multiple_Complex	-10.98	0.0001	0.0043
TC0700002876.mm.1	13.77	T	Ccne1	cyclin E1	Multiple_Complex	-10.97	0.0016	0.0272
TC1100003059.mm.1	-1.9	T	Tnfsfm13; Tnfsf13; Tnfsf12	tumor necrosis factor (ligand) superfamily, membrane-bound member 13; tumor necrosis factor (ligand) superfamily, member 13; tumor necrosis factor (ligand) superfamily, member 12	Coding	-10.97	3.54e-06	0.0003
TC1100000251.mm.1	10.31	T	Bcl11a	B cell CLL/lymphoma 11A (zinc finger protein)	Multiple_Complex	-10.96	2.99e-05	0.0014
TC1100004002.mm.1	-1.88	T	Abca6	ATP-binding cassette, sub-family A (ABC1), member 6	Multiple_Complex	-10.96	0.0011	0.0211
TC0600001790.mm.1	1.03	T	Calcr	calcitonin receptor	Coding	-10.95	5.33e-07	6.01e-05
TC0100003587.mm.1	1.17	T	Cadm3	cell adhesion molecule 3	Multiple_Complex	-10.95	0.0012	0.0218
TC1900000878.mm.1	1.37	T	Ighmbp2	immunoglobulin mu binding protein 2; Synthetic construct Mus musculus clone IMAGE:100068142, MGC:195759 immunoglobulin mu binding protein 2 (Ighmbp2) mRNA, encodes complete protein.	Multiple_Complex	-10.94	4.19e-05	0.0018
TC0300003247.mm.1	-5.64	T	Amy1	amylase 1, salivary	Multiple_Complex	-10.94	0.0381	0.229
TC0500002053.mm.1	1.02	T	Srpk2	serine/arginine-rich protein specific kinase 2	Multiple_Complex	-10.94	0.0014	0.0249
TC0X00002737.mm.1	30.85	T	Gm9103	predicted gene 9103 [Source:MGI Symbol;Acc:MGI:3645364]	Pseudogene	-10.93	1.07e-07	1.75e-05
TC1200000018.mm.1	-2.68	T	Dnajc27	DnaJ (Hsp40) homolog, subfamily C, member 27	Multiple_Complex	-10.93	0.0146	0.1247
TC0700004648.mm.1	3.19	T	Rpl13a; Snord32a; Snord33; Snord34; Mir5121	ribosomal protein L13A; small nucleolar RNA, C/D box 32A; small nucleolar RNA, C/D box 33; small nucleolar RNA, C/D box 34; microRNA 5121; microRNA 5121 (Mir5121), microRNA.	Multiple_Complex	-10.92	0.0023	0.0353
TC1400000271.mm.1	-1.2	T	Arhgef3	Rho guanine nucleotide exchange factor (GEF) 3; Rho guanine nucleotide exchange factor (GEF) 3 (Arhgef3), mRNA.; Rho guanine nucleotide exchange factor (GEF) 3, mRNA (cDNA clone IMAGE:3484755), partial cds.	Multiple_Complex	-10.91	6.62e-05	0.0025
TC1300000912.mm.1	-17.8	T	Ell2	elongation factor RNA polymerase II 2	Coding	-10.9	0.0019	0.0303
TC0700004221.mm.1	5.81	T	Gga2	golgi associated, gamma adaptin ear containing, ARF binding protein 2	Multiple_Complex	-10.9	1.7e-06	0.0001
TC0600001136.mm.1	-3.72	T	Mitf	microphthalmia-associated transcription factor	Multiple_Complex	-10.88	2.54e-06	0.0002	Cassette Exon	0.27
TC0200003299.mm.1	2.23	T	Swi5	SWI5 recombination repair homolog (yeast)	Multiple_Complex	-10.88	0.001	0.0199
TC1000001531.mm.1	-4.03	T	Lrig3	leucine-rich repeats and immunoglobulin-like domains 3	Multiple_Complex	-10.88	5.71e-05	0.0022	Cassette Exon	0.33
TC0X00000694.mm.1	-2.31	T	Srpk3	serine/arginine-rich protein specific kinase 3	Multiple_Complex	-10.88	0.0385	0.2308
TC0900000200.mm.1	3.79	T	Carm1	coactivator-associated arginine methyltransferase 1	Multiple_Complex	-10.87	0.0013	0.0231
TC1300001635.mm.1	13.27	T	Hist1h2bf	histone cluster 1, H2bf; Synthetic construct Mus musculus clone IMAGE:100064051, MGC:193422 histone cluster 1, H2bf (Hist1h2bf) mRNA, encodes complete protein.	Coding	-10.85	6.3e-07	6.86e-05	Alternative 5' Donor Site	0.23
TC1100000654.mm.1	-4.95	T	Gria1	glutamate receptor, ionotropic, AMPA1 (alpha 1)	Multiple_Complex	-10.82	0.0195	0.1505
TC1500001491.mm.1	-3.19	T	Trps1; Mir1907	trichorhinophalangeal syndrome I (human); microRNA 1907	Multiple_Complex	-10.81	0.005	0.0602
TC0100003124.mm.1	-1.11	T	Rnpep	arginyl aminopeptidase (aminopeptidase B)	Multiple_Complex	-10.81	5.84e-05	0.0023
TC0700002302.mm.1	-1.5	T	Vmn2r49	vomeronasal 2, receptor 49	Coding	-10.8	0.0093	0.0925
TC0700002254.mm.1	-1.21	T	Vmn2r42	vomeronasal 2, receptor 42	Multiple_Complex	-10.8	0.0051	0.0612
TC0900001587.mm.1	1.04	T	Ttc21a	tetratricopeptide repeat domain 21A	Multiple_Complex	-10.8	5.05e-08	9.69e-06
TC0200002084.mm.1	-1.44	T	Btbd3	BTB (POZ) domain containing 3	Multiple_Complex	-10.8	0.0038	0.0498
TC1400001848.mm.1	5.72	T			NonCoding	-10.77	0.0044	0.0556
TC1200001988.mm.1	-1.18	T	Zfp36l1	zinc finger protein 36, C3H type-like 1	Multiple_Complex	-10.77	7.36e-06	0.0005
TC0X00000470.mm.1	7.74	T	Phf6	PHD finger protein 6	Multiple_Complex	-10.76	0.0123	0.1114
TC0400001642.mm.1	15.23	T	Aunip	aurora kinase A and ninein interacting protein	Coding	-10.76	0.0011	0.0212
TC0X00003057.mm.1	1.04	T	Serpina7	serine (or cysteine) peptidase inhibitor, clade A (alpha-1 antiproteinase, antitrypsin), member 7	Coding	-10.75	0.0039	0.0504
TC0X00000652.mm.1	8.17	T	Hmgb3	high mobility group box 3	Multiple_Complex	-10.73	1.34e-06	0.0001
TC1300002725.mm.1	-6.13	T	Parp8	poly (ADP-ribose) polymerase family, member 8	Multiple_Complex	-10.73	0.0022	0.0342
TC0200001769.mm.1	6.49	T	Dll4	delta-like 4 (Drosophila)	Multiple_Complex	-10.73	0.0003	0.0082
TC0200001773.mm.1	-1.05	T	Chp1	calcineurin-like EF hand protein 1	Multiple_Complex	-10.72	8.01e-06	0.0005	Alternative 3' Acceptor Site	0.34
TC1100003817.mm.1	-3.05	T	Dusp3	dual specificity phosphatase 3 (vaccinia virus phosphatase VH1-related)	Multiple_Complex	-10.72	6.25e-06	0.0004
TC0600001867.mm.1	-2.05	T	Thsd7a	thrombospondin, type I, domain containing 7A	Multiple_Complex	-10.72	0.0151	0.1277
TC1900001503.mm.1	-1963.99	T	Opalin	oligodendrocytic myelin paranodal and inner loop protein	Coding	-10.71	3.05e-05	0.0014
TC1300000191.mm.1	8.3	T	Hist1h2bk	histone cluster 1, H2bk	Coding	-10.71	0.0002	0.0056	Alternative 3' Acceptor Site	0.24
TC0400002709.mm.1	-1.37	T	Tmem245	transmembrane protein 245	Multiple_Complex	-10.71	3.77e-05	0.0016
TC1500001666.mm.1	-2.43	T	Mir30d	microRNA 30d	Multiple_Complex	-10.7	7.3e-05	0.0027	Alternative 5' Donor Site	0.27
TC0200000801.mm.1	5	T	Kif5c	kinesin family member 5C	Multiple_Complex	-10.69	0.0028	0.0406
TC0100000509.mm.1	-1.24	T	Nrp2	neuropilin 2; Synthetic construct Mus musculus clone IMAGE:100062848, MGC:190972 neuropilin 2 (Nrp2) mRNA, encodes complete protein.	Multiple_Complex	-10.69	0.0001	0.0042
TC0500001137.mm.1	1.6	T	Gm26718	predicted gene, 26718 [Source:MGI Symbol;Acc:MGI:5477212]	NonCoding	-10.68	0.0018	0.0288
TC0400002733.mm.1	-1.51	T	Svep1	sushi, von Willebrand factor type A, EGF and pentraxin domain containing 1	Multiple_Complex	-10.67	0.0037	0.0486
TC0100001836.mm.1	9.35	T	Nsl1	NSL1, MIND kinetochore complex component, homolog (S. cerevisiae)	Coding	-10.67	0.021	0.1582
TC0100002136.mm.1	14.23	T	Prim2	DNA primase, p58 subunit	Multiple_Complex	-10.66	0.0016	0.0266	Cassette Exon	0.23
TC1000000835.mm.1	-1.39	T	Abca7	ATP-binding cassette, sub-family A (ABC1), member 7	Coding	-10.66	0.001	0.0188	Cassette Exon	0.34
TC0500003241.mm.1	1.62	T	Rsrc2	arginine/serine-rich coiled-coil 2; arginine/serine-rich coiled-coil 2 (Rsrc2), transcript variant 2, mRNA.	Multiple_Complex	-10.66	0.0059	0.0681	Intron Retention	0.38
TC0300001255.mm.1	-1.45	T	Sec24d	Sec24 related gene family, member D (S. cerevisiae)	Coding	-10.66	0.0005	0.0121
TC0900001200.mm.1	-2.5	T	Pcolce2	procollagen C-endopeptidase enhancer 2	Multiple_Complex	-10.66	0.0115	0.1067
TC1100003965.mm.1	5.77	T	Cacng5	calcium channel, voltage-dependent, gamma subunit 5	Coding	-10.66	0.0002	0.0054
TC1300002603.mm.1	2.85	T			NonCoding	-10.65	0.0055	0.065
TC1100003769.mm.1	-8.94	T	Jup	junction plakoglobin	Multiple_Complex	-10.65	0.0003	0.0071
TC1400001533.mm.1	12.59	T	Dnajc9	DnaJ (Hsp40) homolog, subfamily C, member 9	Coding	-10.64	9.1e-05	0.0032
TC0600003163.mm.1	-146.63	T	Kcna1	potassium voltage-gated channel, shaker-related subfamily, member 1	Multiple_Complex	-10.63	6.4e-07	6.94e-05
TC1300001033.mm.1	20.09	T	Dhfr	dihydrofolate reductase	Multiple_Complex	-10.63	0.005	0.0608
TC0900001182.mm.1	-21.31	T	Slc9a9	solute carrier family 9 (sodium/hydrogen exchanger), member 9	Multiple_Complex	-10.63	0.0054	0.0642
TC1000002491.mm.1	-2.06	T	Cbarp	calcium channel, voltage-dependent, beta subunit associated regulatory protein	Multiple_Complex	-10.63	0.0047	0.058
TC0400002527.mm.1	1.91	T	Arhgef39	Rho guanine nucleotide exchange factor (GEF) 39	Multiple_Complex	-10.62	0.0184	0.145
TC1600001974.mm.1	-1.32	T	Adamts1	a disintegrin-like and metallopeptidase (reprolysin type) with thrombospondin type 1 motif, 1	Multiple_Complex	-10.61	0.007	0.0766
TC0600001964.mm.1	-1.07	T	Zfp800	zinc finger protein 800	Multiple_Complex	-10.61	7.65e-05	0.0028
TC0100002604.mm.1	-26.41	T	Tuba4a	tubulin, alpha 4A	Coding	-10.6	0.0004	0.0099
TC0200005092.mm.1	1.06	T	Hnf4aos	hepatic nuclear factor 4 alpha, opposite strand	Multiple_Complex	-10.6	8.72e-06	0.0005
TC0200004922.mm.1	1.31	T	Pdrg1	p53 and DNA damage regulated 1	Multiple_Complex	-10.6	0.0305	0.1997
TC1200002045.mm.1	-2.69	T	Dpf3	D4, zinc and double PHD fingers, family 3	Multiple_Complex	-10.59	7.13e-05	0.0026	Alternative 3' Acceptor Site	0.34
TC0300001035.mm.1	-286.01	T	Tspan2	tetraspanin 2	Multiple_Complex	-10.59	0.0007	0.0155
TC0200004822.mm.1	1.06	T			NonCoding	-10.59	2.01e-05	0.001
TC1000000550.mm.1	-1.17	T			NonCoding	-10.58	0.0013	0.023
TC1300001954.mm.1	-4.91	T	1110007C09Rik	RIKEN cDNA 1110007C09 gene	Coding	-10.58	1.92e-05	0.001
TC0900003264.mm.1	1.98	T	Ulk4	unc-51-like kinase 4	Multiple_Complex	-10.58	0.0002	0.0066
TC1700002110.mm.1	8.2	T	Cenpq	centromere protein Q	Multiple_Complex	-10.57	9.15e-05	0.0032
TC1700002688.mm.1	-1.23	T	4833418N02Rik	RIKEN cDNA 4833418N02 gene	NonCoding	-10.57	2.29e-06	0.0002
TC1600001400.mm.1	-5.77	T	Bcl6	B cell leukemia/lymphoma 6	Multiple_Complex	-10.57	7.19e-06	0.0004
TC1400002334.mm.1	-16.45	T	Sorbs3	sorbin and SH3 domain containing 3	Coding	-10.57	4.22e-08	8.45e-06
TC1400001456.mm.1	3.3	T	Cadps	Ca2+-dependent secretion activator	Coding	-10.57	0.0012	0.0222
TC1100001378.mm.1	-5.78	T	C030037D09Rik	RIKEN cDNA C030037D09 gene	NonCoding	-10.55	2.21e-05	0.0011	Alternative 3' Acceptor Site	0.35
TC0700001851.mm.1	3.23	T	Srcap; Tmem265	Snf2-related CREBBP activator protein; transmembrane protein 265	Multiple_Complex	-10.55	0.0018	0.0296
TC0600003185.mm.1	-5.68	T	Tspan9	tetraspanin 9	Multiple_Complex	-10.55	0.001	0.0192	Cassette Exon	0.27
TC0700000861.mm.1	-3.54	T	Dbp	D site albumin promoter binding protein	Multiple_Complex	-10.55	4.15e-06	0.0003
TC0900000203.mm.1	6.1	T	Smarca4	SWI/SNF related, matrix associated, actin dependent regulator of chromatin, subfamily a, member 4	Multiple_Complex	-10.54	4.77e-08	9.28e-06	Cassette Exon	0.21
TC1100004062.mm.1	-238.28	T	Grin2c	glutamate receptor, ionotropic, NMDA2C (epsilon 3)	Coding	-10.54	0.0001	0.0045
TC1100001155.mm.1	6.89	T	Spag5	sperm associated antigen 5	Multiple_Complex	-10.54	0.0001	0.0036
TC1000000789.mm.1	-2.84	T	Ilvbl	ilvB (bacterial acetolactate synthase)-like	Coding	-10.54	0.0002	0.0066
TC1100000494.mm.1	-1.31	T	Trim7	tripartite motif-containing 7; tripartite motif-containing 7 (Trim7), mRNA.	Multiple_Complex	-10.53	3.12e-05	0.0014	Cassette Exon	0.29
TC0200005175.mm.1	-7.88	T	Prex1	phosphatidylinositol-3,4,5-trisphosphate-dependent Rac exchange factor 1	Multiple_Complex	-10.52	3.87e-06	0.0003	Cassette Exon	0.26
TC0800001903.mm.1	-1.28	T	Plekha2	pleckstrin homology domain-containing, family A (phosphoinositide binding specific) member 2	Coding	-10.52	6.7e-07	7.18e-05
TC0500000750.mm.1	-4.05	T	Adgrl3	adhesion G protein-coupled receptor L3	Multiple_Complex	-10.52	6.46e-05	0.0024
TC1100001624.mm.1	-9.65	T	Fkbp10	FK506 binding protein 10	Multiple_Complex	-10.52	0.001	0.0187
TC1700001315.mm.1	9.09	T	Msh6	mutS homolog 6 (E. coli)	Coding	-10.52	0.0001	0.0041
TC0200001963.mm.1	2.71	T	Stk35	serine/threonine kinase 35	Multiple_Complex	-10.51	0.0147	0.1254
TC1300000285.mm.1	-1.06	T	Dcdc2a	doublecortin domain containing 2a	Multiple_Complex	-10.5	0.0003	0.007
TC0500000176.mm.1	1.92	T	Pmpcb	peptidase (mitochondrial processing) beta	Multiple_Complex	-10.5	0.0018	0.0296
TC0900001921.mm.1	-3.36	T	Dpy19l1	dpy-19-like 1 (C. elegans)	Multiple_Complex	-10.5	0.0041	0.0529
TC0400004196.mm.1	-2.15	T	Aldh4a1	aldehyde dehydrogenase 4 family, member A1	Multiple_Complex	-10.49	0.001	0.0189
TC0700000033.mm.1	-1.52	T	Eps8l1	EPS8-like 1; Synthetic construct Mus musculus clone IMAGE:100068366, MGC:195910 EPS8-like 1 (Eps8l1) mRNA, encodes complete protein.	Multiple_Complex	-10.47	2.78e-05	0.0013
TC0200001866.mm.1	-40.01	T	Sema6d	sema domain, transmembrane domain (TM), and cytoplasmic domain, (semaphorin) 6D	Multiple_Complex	-10.46	0.0008	0.0163
TC0200002261.mm.1	1.51	T	Nsfl1c	NSFL1 (p97) cofactor (p47)	Multiple_Complex	-10.46	0.0022	0.0335	Alternative 5' Donor Site	0.27
TC1300000523.mm.1	-1.58	T	Gmpr	guanosine monophosphate reductase	Multiple_Complex	-10.44	7.94e-05	0.0029	Cassette Exon	0.32
TC0200002577.mm.1	6.8	T	Cse1l	chromosome segregation 1-like (S. cerevisiae)	Multiple_Complex	-10.44	0.0039	0.0504
TC1400000195.mm.1	2.74	T	Kat6b	K(lysine) acetyltransferase 6B	Multiple_Complex	-10.43	0.0002	0.0055	Alternative 5' Donor Site	0.26
TC0400002480.mm.1	-1.52	T	Ccl27a	chemokine (C-C motif) ligand 27A	Multiple_Complex	-10.42	0.0008	0.0167
TC0200002980.mm.1	-1.26	T	C1ql3	C1q-like 3	Multiple_Complex	-10.42	0.001	0.0199	Alternative 5' Donor Site	0.25
TC0700003744.mm.1	7.36	T	Gm19453	PREDICTED: predicted gene, 19453 (Gm19453), miscRNA.	NonCoding	-10.42	0.0029	0.041
TC1100001425.mm.1	-2.45	T	Spag9	sperm associated antigen 9	Multiple_Complex	-10.42	0.0004	0.0104	Cassette Exon	0.39
TC0800002553.mm.1	-3.04	T	Tecr	trans-2,3-enoyl-CoA reductase	Coding	-10.41	0.0108	0.1019
TC0200004156.mm.1	1.17	T			NonCoding	-10.41	0.004	0.0517
TC1000000933.mm.1	10.72	T	Txnrd1	thioredoxin reductase 1	Multiple_Complex	-10.41	6.74e-07	7.21e-05
TC0400003629.mm.1	4.1	T	Serinc2	serine incorporator 2	Coding	-10.4	0.0001	0.0036
TC1700000647.mm.1	2.99	T	Nelfe	negative elongation factor complex member E, Rdbp	Multiple_Complex	-10.4	0.0374	0.2266	Intron Retention	0.42
TC1100000310.mm.1	-1.25	T			NonCoding	-10.4	3.43e-06	0.0003	Alternative 5' Donor Site	0.27
TC0200000714.mm.1	-6.93	T	Olfml2a	olfactomedin-like 2A	Multiple_Complex	-10.39	2.94e-05	0.0013	Cassette Exon	0.27
TC0600000925.mm.1	-1.17	T	Dctn1	dynactin 1	Multiple_Complex	-10.38	0.0002	0.0049
TC0400000335.mm.1	24.58	T			NonCoding	-10.38	4.22e-05	0.0018
TC0100002257.mm.1	1.15	T	Pantr1	POU domain, class 3, transcription factor 3 adjacent noncoding transcript 1	NonCoding	-10.37	0.0004	0.0089	Cassette Exon	0.23
TC0600002381.mm.1	-1.6	T	Fam13a	family with sequence similarity 13, member A	Multiple_Complex	-10.37	0.0006	0.0138
TC1700000873.mm.1	-1.84	T	F630040K05Rik	RIKEN cDNA F630040K05 gene	NonCoding	-10.37	1.84e-06	0.0002	Cassette Exon	0.28
TC1400001031.mm.1	4.32	T	Rcbtb2	regulator of chromosome condensation (RCC1) and BTB (POZ) domain containing protein 2	Multiple_Complex	-10.37	0.02	0.1531
TC0900000976.mm.1	4.09	T	Nedd4	neural precursor cell expressed, developmentally down-regulated 4	Multiple_Complex	-10.36	0.0048	0.0585
TC0300001834.mm.1	-1.08	T	Gm3143	predicted gene 3143; predicted gene 3143 (Gm3143), transcript variant 2, non-coding RNA.; predicted gene 3143 (Gm3143), transcript variant 1, non-coding RNA.	NonCoding	-10.36	1.79e-07	2.59e-05
TC1400001747.mm.1	1.9	T	Ghitm	growth hormone inducible transmembrane protein	Multiple_Complex	-10.36	0.0342	0.2143
TC0100003092.mm.1	11.22	T	Snrpe	small nuclear ribonucleoprotein E	Coding	-10.36	8.76e-06	0.0005	Intron Retention	0.37
TC1700000117.mm.1	-24.35	T	Agpat4	1-acylglycerol-3-phosphate O-acyltransferase 4 (lysophosphatidic acid acyltransferase, delta)	Multiple_Complex	-10.35	0.0008	0.0156
TCUn_GL45637200000001.mm.1	-1.24	T			Multiple_Complex	-10.35	5.77e-08	1.07e-05
TC0200001557.mm.1	1.05	T			NonCoding	-10.34	0.0012	0.0223
TC0200000955.mm.1	-1.33	T	Csrnp3	cysteine-serine-rich nuclear protein 3	Multiple_Complex	-10.33	0.002	0.0316
TC1700000917.mm.1	1.34	T	Ccnd3	cyclin D3	Multiple_Complex	-10.33	0.0008	0.016
TC0700004170.mm.1	-1.04	T			NonCoding	-10.33	0.0022	0.0342
TC1100001877.mm.1	-1.7	T	Dnaic2	dynein, axonemal, intermediate chain 2; Synthetic construct Mus musculus clone IMAGE:100062019, MGC:190327 dynein, axonemal, intermediate chain 2 (Dnaic2) mRNA, encodes complete protein.	Multiple_Complex	-10.33	0.0021	0.0327
TC0700000827.mm.1	-1.09	T	Nosip	nitric oxide synthase interacting protein	Multiple_Complex	-10.33	0.0046	0.0572	Alternative 3' Acceptor Site	0.24
TC1600000286.mm.1	3.35	T	Psmd2	proteasome (prosome, macropain) 26S subunit, non-ATPase, 2	Multiple_Complex	-10.32	2.25e-08	5.2e-06
TC0800002235.mm.1	12.6	T	Neil3	nei like 3 (E. coli)	Multiple_Complex	-10.31	0.0009	0.0185	Cassette Exon	0.32
TC1700000641.mm.1	-7.63	T	Prrt1	proline-rich transmembrane protein 1	Multiple_Complex	-10.31	0.0003	0.0081
TC1300001438.mm.1	-1.06	T	Ryr2	ryanodine receptor 2, cardiac	Multiple_Complex	-10.3	0.002	0.0314
TC0700001996.mm.1	-4.4	T	Adgra1	adhesion G protein-coupled receptor A1	Multiple_Complex	-10.29	0.0167	0.1361
TC0400000498.mm.1	-1.82	T	Tdrd7	tudor domain containing 7	Multiple_Complex	-10.29	4.83e-05	0.002
TC1200000895.mm.1	-1.21	T	Adck1	aarF domain containing kinase 1; aarF domain containing kinase 1 (Adck1), mRNA.	Multiple_Complex	-10.29	3.48e-06	0.0003
TC1200001280.mm.1	2.74	T	Mta1	metastasis associated 1	Multiple_Complex	-10.29	1.7e-06	0.0001
[truncated: 10,960 more rows]

## Sheet: qNSC_GSEA
GSEA
Gene Ontology : biological process, cellular Component
s-qNSC
Overlap Results
# overlaps shown:	10
# genesets in collections:	12364
# genes in comparison (n):	493
# genes in universe (N):	42766
Gene Set Name	# Genes in Gene Set (K)	Description	# Genes in Overlap (k)	k/K	p-value	FDR q-value
GOBP_MITOTIC_CELL_CYCLE_PROCESS	755	A process that is part of the mitotic cell cycle. [GO_REF:0000060, GOC:mtg_cell_cycle, GOC:TermGenie]	71	0.094	1.27e-42	1.58e-38
GOBP_MITOTIC_CELL_CYCLE	903	Progression through the phases of the mitotic cell cycle, the most common eukaryotic cell cycle, which canonically comprises four successive phases called G1, S, G2, and M and includes replication of the genome and the subsequent segregation of chromosomes into daughter cells. In some variant cell cycles nuclear replication or nuclear division may not be followed by cell division, or G1 and G2 ph…	75	0.0831	2.94e-41	1.81e-37
GOBP_CYTOSKELETON_ORGANIZATION	1488	A process that is carried out at the cellular level which results in the assembly, arrangement of constituent parts, or disassembly of cytoskeletal structures. [GOC:dph, GOC:jl, GOC:mah]	91	0.0612	2.49e-39	1.03e-35
GOBP_NEUROGENESIS	1920	Generation of cells within the nervous system. [GO_REF:0000021, GOC:cls, GOC:curators, GOC:dgh, GOC:dph, GOC:jid]	99	0.0516	1.31e-36	3.86e-33
GOBP_CELL_CYCLE_PROCESS	1257	The cellular process that ensures successive accurate and complete genome replication and chromosome segregation. [GOC:isa_complete, GOC:mtg_cell_cycle]	81	0.0644	1.56e-36	3.86e-33
GOBP_CELL_PROJECTION_ORGANIZATION	1731	A process that is carried out at the cellular level which results in the assembly, arrangement of constituent parts, or disassembly of a prolongation or process extending from a cell, e.g. a flagellum or axon. [GOC:jl, GOC:mah, http://www.cogsci.princeton.edu/~wn/]	92	0.0531	5.92e-35	1.22e-31
REACTOME_CELL_CYCLE	601	Cell Cycle	54	0.0899	1.77e-31	3.12e-28
GOBP_GENERATION_OF_NEURONS	1678	The process in which nerve cells are generated. This includes the production of neuroblasts and their differentiation into neurons. [GOC:nln]	85	0.0507	9.48e-31	1.46e-27
GOBP_CELL_CYCLE	1809	The progression of biochemical and morphological phases and events that occur in a cell during successive cell replication or nuclear replication events. Canonically, the cell cycle comprises the replication and segregation of genetic material followed by the division of the cell, but in endocycles or syncytial cells nuclear replication or nuclear division may not be followed by cell division. [G…	88	0.0486	1.42e-30	1.95e-27
GOBP_NEURON_DEVELOPMENT	1317	The process whose specific outcome is the progression of a neuron over time, from initial commitment of the cell to a specific fate, to the fully functional differentiated cell. [GOC:dph]	75	0.0569	2.6e-30	3.22e-27
Gene/Gene Set Overlap Matrix
								GOBP_CELL_PROJECTION_ORGANIZATION	REACTOME_CELL_CYCLE
Entrez Gene Id	Gene Symbol	Gene Description	GOBP_MITOTIC_CELL_CYCLE_PROCESS	GOBP_MITOTIC_CELL_CYCLE	GOBP_CYTOSKELETON_ORGANIZATION	GOBP_NEUROGENESIS	GOBP_CELL_CYCLE_PROCESS	GOBP_CELL_PROJECTION_ORGANIZATION	REACTOME_CELL_CYCLE	GOBP_GENERATION_OF_NEURONS	GOBP_CELL_CYCLE	GOBP_NEURON_DEVELOPMENT
107995	Cdc20	cell division cycle 20 [Source:MGI Symbol;Acc:MGI:1859866]	GOBP_MITOTIC_CELL_CYCLE_PROCESS	GOBP_MITOTIC_CELL_CYCLE	GOBP_CYTOSKELETON_ORGANIZATION	GOBP_NEUROGENESIS	GOBP_CELL_CYCLE_PROCESS	GOBP_CELL_PROJECTION_ORGANIZATION		GOBP_GENERATION_OF_NEURONS	GOBP_CELL_CYCLE	GOBP_NEURON_DEVELOPMENT
270058	Map1s	microtubule-associated protein 1S [Source:MGI Symbol;Acc:MGI:2443304]	GOBP_MITOTIC_CELL_CYCLE_PROCESS	GOBP_MITOTIC_CELL_CYCLE	GOBP_CYTOSKELETON_ORGANIZATION	GOBP_NEUROGENESIS	GOBP_CELL_CYCLE_PROCESS	GOBP_CELL_PROJECTION_ORGANIZATION		GOBP_GENERATION_OF_NEURONS	GOBP_CELL_CYCLE	GOBP_NEURON_DEVELOPMENT
77579	Myh10	myosin, heavy polypeptide 10, non-muscle [Source:MGI Symbol;Acc:MGI:1930780]	GOBP_MITOTIC_CELL_CYCLE_PROCESS	GOBP_MITOTIC_CELL_CYCLE	GOBP_CYTOSKELETON_ORGANIZATION	GOBP_NEUROGENESIS	GOBP_CELL_CYCLE_PROCESS	GOBP_CELL_PROJECTION_ORGANIZATION		GOBP_GENERATION_OF_NEURONS	GOBP_CELL_CYCLE	GOBP_NEURON_DEVELOPMENT
11735	Ank3	ankyrin 3, epithelial [Source:MGI Symbol;Acc:MGI:88026]	GOBP_MITOTIC_CELL_CYCLE_PROCESS	GOBP_MITOTIC_CELL_CYCLE	GOBP_CYTOSKELETON_ORGANIZATION	GOBP_NEUROGENESIS	GOBP_CELL_CYCLE_PROCESS	GOBP_CELL_PROJECTION_ORGANIZATION		GOBP_GENERATION_OF_NEURONS	GOBP_CELL_CYCLE	GOBP_NEURON_DEVELOPMENT
106042	Prickle1	prickle planar cell polarity protein 1 [Source:MGI Symbol;Acc:MGI:1916034]	GOBP_MITOTIC_CELL_CYCLE_PROCESS	GOBP_MITOTIC_CELL_CYCLE	GOBP_CYTOSKELETON_ORGANIZATION	GOBP_NEUROGENESIS	GOBP_CELL_CYCLE_PROCESS			GOBP_GENERATION_OF_NEURONS	GOBP_CELL_CYCLE	GOBP_NEURON_DEVELOPMENT
26934	Racgap1	Rac GTPase-activating protein 1 [Source:MGI Symbol;Acc:MGI:1349423]	GOBP_MITOTIC_CELL_CYCLE_PROCESS	GOBP_MITOTIC_CELL_CYCLE	GOBP_CYTOSKELETON_ORGANIZATION	GOBP_NEUROGENESIS	GOBP_CELL_CYCLE_PROCESS			GOBP_GENERATION_OF_NEURONS	GOBP_CELL_CYCLE
13605	Ect2	ect2 oncogene [Source:MGI Symbol;Acc:MGI:95281]	GOBP_MITOTIC_CELL_CYCLE_PROCESS	GOBP_MITOTIC_CELL_CYCLE	GOBP_CYTOSKELETON_ORGANIZATION	GOBP_NEUROGENESIS	GOBP_CELL_CYCLE_PROCESS	GOBP_CELL_PROJECTION_ORGANIZATION		GOBP_GENERATION_OF_NEURONS	GOBP_CELL_CYCLE
20460	Stil	Scl/Tal1 interrupting locus [Source:MGI Symbol;Acc:MGI:107477]	GOBP_MITOTIC_CELL_CYCLE_PROCESS	GOBP_MITOTIC_CELL_CYCLE	GOBP_CYTOSKELETON_ORGANIZATION		GOBP_CELL_CYCLE_PROCESS	GOBP_CELL_PROJECTION_ORGANIZATION			GOBP_CELL_CYCLE
13860	Eps8	epidermal growth factor receptor pathway substrate 8 [Source:MGI Symbol;Acc:MGI:104684]	GOBP_MITOTIC_CELL_CYCLE_PROCESS	GOBP_MITOTIC_CELL_CYCLE	GOBP_CYTOSKELETON_ORGANIZATION		GOBP_CELL_CYCLE_PROCESS	GOBP_CELL_PROJECTION_ORGANIZATION			GOBP_CELL_CYCLE
18761	Prkcq	protein kinase C, theta [Source:MGI Symbol;Acc:MGI:97601]	GOBP_MITOTIC_CELL_CYCLE_PROCESS	GOBP_MITOTIC_CELL_CYCLE	GOBP_CYTOSKELETON_ORGANIZATION		GOBP_CELL_CYCLE_PROCESS		REACTOME_CELL_CYCLE		GOBP_CELL_CYCLE
18817	Plk1	polo like kinase 1 [Source:MGI Symbol;Acc:MGI:97621]	GOBP_MITOTIC_CELL_CYCLE_PROCESS	GOBP_MITOTIC_CELL_CYCLE	GOBP_CYTOSKELETON_ORGANIZATION		GOBP_CELL_CYCLE_PROCESS		REACTOME_CELL_CYCLE		GOBP_CELL_CYCLE
71819	Kif23	kinesin family member 23 [Source:MGI Symbol;Acc:MGI:1919069]	GOBP_MITOTIC_CELL_CYCLE_PROCESS	GOBP_MITOTIC_CELL_CYCLE	GOBP_CYTOSKELETON_ORGANIZATION		GOBP_CELL_CYCLE_PROCESS		REACTOME_CELL_CYCLE		GOBP_CELL_CYCLE
228421	Kif18a	kinesin family member 18A [Source:MGI Symbol;Acc:MGI:2446977]	GOBP_MITOTIC_CELL_CYCLE_PROCESS	GOBP_MITOTIC_CELL_CYCLE	GOBP_CYTOSKELETON_ORGANIZATION		GOBP_CELL_CYCLE_PROCESS		REACTOME_CELL_CYCLE		GOBP_CELL_CYCLE
72119	Tpx2	TPX2, microtubule-associated [Source:MGI Symbol;Acc:MGI:1919369]	GOBP_MITOTIC_CELL_CYCLE_PROCESS	GOBP_MITOTIC_CELL_CYCLE	GOBP_CYTOSKELETON_ORGANIZATION		GOBP_CELL_CYCLE_PROCESS		REACTOME_CELL_CYCLE		GOBP_CELL_CYCLE
20877	Aurkb	aurora kinase B [Source:MGI Symbol;Acc:MGI:107168]	GOBP_MITOTIC_CELL_CYCLE_PROCESS	GOBP_MITOTIC_CELL_CYCLE	GOBP_CYTOSKELETON_ORGANIZATION		GOBP_CELL_CYCLE_PROCESS		REACTOME_CELL_CYCLE		GOBP_CELL_CYCLE
66371	Chmp4c	charged multivesicular body protein 4C [Source:MGI Symbol;Acc:MGI:1913621]	GOBP_MITOTIC_CELL_CYCLE_PROCESS	GOBP_MITOTIC_CELL_CYCLE	GOBP_CYTOSKELETON_ORGANIZATION		GOBP_CELL_CYCLE_PROCESS		REACTOME_CELL_CYCLE		GOBP_CELL_CYCLE
268697	Ccnb1	cyclin B1 [Source:MGI Symbol;Acc:MGI:88302]	GOBP_MITOTIC_CELL_CYCLE_PROCESS	GOBP_MITOTIC_CELL_CYCLE	GOBP_CYTOSKELETON_ORGANIZATION		GOBP_CELL_CYCLE_PROCESS		REACTOME_CELL_CYCLE		GOBP_CELL_CYCLE
56150	Mad2l1	MAD2 mitotic arrest deficient-like 1 [Source:MGI Symbol;Acc:MGI:1860374]	GOBP_MITOTIC_CELL_CYCLE_PROCESS	GOBP_MITOTIC_CELL_CYCLE	GOBP_CYTOSKELETON_ORGANIZATION		GOBP_CELL_CYCLE_PROCESS		REACTOME_CELL_CYCLE		GOBP_CELL_CYCLE
67052	Ndc80	NDC80 kinetochore complex component [Source:MGI Symbol;Acc:MGI:1914302]	GOBP_MITOTIC_CELL_CYCLE_PROCESS	GOBP_MITOTIC_CELL_CYCLE	GOBP_CYTOSKELETON_ORGANIZATION		GOBP_CELL_CYCLE_PROCESS		REACTOME_CELL_CYCLE		GOBP_CELL_CYCLE
19348	Kif20a	kinesin family member 20A [Source:MGI Symbol;Acc:MGI:1201682]	GOBP_MITOTIC_CELL_CYCLE_PROCESS	GOBP_MITOTIC_CELL_CYCLE	GOBP_CYTOSKELETON_ORGANIZATION		GOBP_CELL_CYCLE_PROCESS		REACTOME_CELL_CYCLE		GOBP_CELL_CYCLE
52276	Cdca8	cell division cycle associated 8 [Source:MGI Symbol;Acc:MGI:1196274]	GOBP_MITOTIC_CELL_CYCLE_PROCESS	GOBP_MITOTIC_CELL_CYCLE	GOBP_CYTOSKELETON_ORGANIZATION		GOBP_CELL_CYCLE_PROCESS		REACTOME_CELL_CYCLE		GOBP_CELL_CYCLE
12442	Ccnb2	cyclin B2 [Source:MGI Symbol;Acc:MGI:88311]	GOBP_MITOTIC_CELL_CYCLE_PROCESS	GOBP_MITOTIC_CELL_CYCLE	GOBP_CYTOSKELETON_ORGANIZATION		GOBP_CELL_CYCLE_PROCESS		REACTOME_CELL_CYCLE		GOBP_CELL_CYCLE
12649	Chek1	checkpoint kinase 1 [Source:MGI Symbol;Acc:MGI:1202065]	GOBP_MITOTIC_CELL_CYCLE_PROCESS	GOBP_MITOTIC_CELL_CYCLE	GOBP_CYTOSKELETON_ORGANIZATION		GOBP_CELL_CYCLE_PROCESS				GOBP_CELL_CYCLE
16551	Kif11	kinesin family member 11 [Source:MGI Symbol;Acc:MGI:1098231]	GOBP_MITOTIC_CELL_CYCLE_PROCESS	GOBP_MITOTIC_CELL_CYCLE	GOBP_CYTOSKELETON_ORGANIZATION		GOBP_CELL_CYCLE_PROCESS				GOBP_CELL_CYCLE
70218	Kif18b	kinesin family member 18B [Source:MGI Symbol;Acc:MGI:2446979]	GOBP_MITOTIC_CELL_CYCLE_PROCESS	GOBP_MITOTIC_CELL_CYCLE	GOBP_CYTOSKELETON_ORGANIZATION		GOBP_CELL_CYCLE_PROCESS				GOBP_CELL_CYCLE
108907	Nusap1	nucleolar and spindle associated protein 1 [Source:MGI Symbol;Acc:MGI:2675669]	GOBP_MITOTIC_CELL_CYCLE_PROCESS	GOBP_MITOTIC_CELL_CYCLE	GOBP_CYTOSKELETON_ORGANIZATION		GOBP_CELL_CYCLE_PROCESS				GOBP_CELL_CYCLE
233406	Prc1	protein regulator of cytokinesis 1 [Source:MGI Symbol;Acc:MGI:1858961]	GOBP_MITOTIC_CELL_CYCLE_PROCESS	GOBP_MITOTIC_CELL_CYCLE	GOBP_CYTOSKELETON_ORGANIZATION		GOBP_CELL_CYCLE_PROCESS				GOBP_CELL_CYCLE
51944	Knstrn	kinetochore-localized astrin/SPAG5 binding [Source:MGI Symbol;Acc:MGI:1289298]	GOBP_MITOTIC_CELL_CYCLE_PROCESS	GOBP_MITOTIC_CELL_CYCLE	GOBP_CYTOSKELETON_ORGANIZATION		GOBP_CELL_CYCLE_PROCESS				GOBP_CELL_CYCLE
78906	Misp	mitotic spindle positioning [Source:MGI Symbol;Acc:MGI:1926156]	GOBP_MITOTIC_CELL_CYCLE_PROCESS	GOBP_MITOTIC_CELL_CYCLE	GOBP_CYTOSKELETON_ORGANIZATION		GOBP_CELL_CYCLE_PROCESS				GOBP_CELL_CYCLE
209737	Kif15	kinesin family member 15 [Source:MGI Symbol;Acc:MGI:1098258]	GOBP_MITOTIC_CELL_CYCLE_PROCESS	GOBP_MITOTIC_CELL_CYCLE	GOBP_CYTOSKELETON_ORGANIZATION		GOBP_CELL_CYCLE_PROCESS				GOBP_CELL_CYCLE
16581	Kifc2	kinesin family member C2 [Source:MGI Symbol;Acc:MGI:109187]	GOBP_MITOTIC_CELL_CYCLE_PROCESS	GOBP_MITOTIC_CELL_CYCLE	GOBP_CYTOSKELETON_ORGANIZATION		GOBP_CELL_CYCLE_PROCESS				GOBP_CELL_CYCLE
16571	Kif4	kinesin family member 4 [Source:MGI Symbol;Acc:MGI:108389]	GOBP_MITOTIC_CELL_CYCLE_PROCESS	GOBP_MITOTIC_CELL_CYCLE	GOBP_CYTOSKELETON_ORGANIZATION		GOBP_CELL_CYCLE_PROCESS				GOBP_CELL_CYCLE
218977	Dlgap5	DLG associated protein 5 [Source:MGI Symbol;Acc:MGI:2183453]	GOBP_MITOTIC_CELL_CYCLE_PROCESS	GOBP_MITOTIC_CELL_CYCLE	GOBP_CYTOSKELETON_ORGANIZATION		GOBP_CELL_CYCLE_PROCESS				GOBP_CELL_CYCLE
209334	Gen1	GEN1, Holliday junction 5' flap endonuclease [Source:MGI Symbol;Acc:MGI:2443149]	GOBP_MITOTIC_CELL_CYCLE_PROCESS	GOBP_MITOTIC_CELL_CYCLE	GOBP_CYTOSKELETON_ORGANIZATION		GOBP_CELL_CYCLE_PROCESS				GOBP_CELL_CYCLE
233752	Insc	INSC spindle orientation adaptor protein [Source:MGI Symbol;Acc:MGI:1917942]	GOBP_MITOTIC_CELL_CYCLE_PROCESS	GOBP_MITOTIC_CELL_CYCLE	GOBP_CYTOSKELETON_ORGANIZATION		GOBP_CELL_CYCLE_PROCESS	GOBP_CELL_PROJECTION_ORGANIZATION			GOBP_CELL_CYCLE
329152	Hecw2	HECT, C2 and WW domain containing E3 ubiquitin protein ligase 2 [Source:MGI Symbol;Acc:MGI:2685817]	GOBP_MITOTIC_CELL_CYCLE_PROCESS	GOBP_MITOTIC_CELL_CYCLE		GOBP_NEUROGENESIS	GOBP_CELL_CYCLE_PROCESS	GOBP_CELL_PROJECTION_ORGANIZATION		GOBP_GENERATION_OF_NEURONS	GOBP_CELL_CYCLE	GOBP_NEURON_DEVELOPMENT
14056	Ezh2	enhancer of zeste 2 polycomb repressive complex 2 subunit [Source:MGI Symbol;Acc:MGI:107940]	GOBP_MITOTIC_CELL_CYCLE_PROCESS	GOBP_MITOTIC_CELL_CYCLE		GOBP_NEUROGENESIS	GOBP_CELL_CYCLE_PROCESS		REACTOME_CELL_CYCLE	GOBP_GENERATION_OF_NEURONS	GOBP_CELL_CYCLE	GOBP_NEURON_DEVELOPMENT
12571	Cdk6	cyclin-dependent kinase 6 [Source:MGI Symbol;Acc:MGI:1277162]	GOBP_MITOTIC_CELL_CYCLE_PROCESS	GOBP_MITOTIC_CELL_CYCLE		GOBP_NEUROGENESIS	GOBP_CELL_CYCLE_PROCESS				GOBP_CELL_CYCLE
118454	Gjc2	gap junction protein, gamma 2 [Source:MGI Symbol;Acc:MGI:2153060]	GOBP_MITOTIC_CELL_CYCLE_PROCESS	GOBP_MITOTIC_CELL_CYCLE		GOBP_NEUROGENESIS	GOBP_CELL_CYCLE_PROCESS		REACTOME_CELL_CYCLE		GOBP_CELL_CYCLE
208628	Kntc1	kinetochore associated 1 [Source:MGI Symbol;Acc:MGI:2673709]	GOBP_MITOTIC_CELL_CYCLE_PROCESS	GOBP_MITOTIC_CELL_CYCLE			GOBP_CELL_CYCLE_PROCESS		REACTOME_CELL_CYCLE		GOBP_CELL_CYCLE
12236	Bub1b	BUB1B, mitotic checkpoint serine/threonine kinase [Source:MGI Symbol;Acc:MGI:1333889]	GOBP_MITOTIC_CELL_CYCLE_PROCESS	GOBP_MITOTIC_CELL_CYCLE			GOBP_CELL_CYCLE_PROCESS		REACTOME_CELL_CYCLE		GOBP_CELL_CYCLE
108000	Cenpf	centromere protein F [Source:MGI Symbol;Acc:MGI:1313302]	GOBP_MITOTIC_CELL_CYCLE_PROCESS	GOBP_MITOTIC_CELL_CYCLE			GOBP_CELL_CYCLE_PROCESS		REACTOME_CELL_CYCLE		GOBP_CELL_CYCLE
12235	Bub1	BUB1, mitotic checkpoint serine/threonine kinase [Source:MGI Symbol;Acc:MGI:1100510]	GOBP_MITOTIC_CELL_CYCLE_PROCESS	GOBP_MITOTIC_CELL_CYCLE			GOBP_CELL_CYCLE_PROCESS		REACTOME_CELL_CYCLE		GOBP_CELL_CYCLE
12534	Cdk1	cyclin-dependent kinase 1 [Source:MGI Symbol;Acc:MGI:88351]	GOBP_MITOTIC_CELL_CYCLE_PROCESS	GOBP_MITOTIC_CELL_CYCLE			GOBP_CELL_CYCLE_PROCESS		REACTOME_CELL_CYCLE		GOBP_CELL_CYCLE
16906	Lmnb1	lamin B1 [Source:MGI Symbol;Acc:MGI:96795]	GOBP_MITOTIC_CELL_CYCLE_PROCESS	GOBP_MITOTIC_CELL_CYCLE			GOBP_CELL_CYCLE_PROCESS		REACTOME_CELL_CYCLE		GOBP_CELL_CYCLE
70099	Smc4	structural maintenance of chromosomes 4 [Source:MGI Symbol;Acc:MGI:1917349]	GOBP_MITOTIC_CELL_CYCLE_PROCESS	GOBP_MITOTIC_CELL_CYCLE			GOBP_CELL_CYCLE_PROCESS		REACTOME_CELL_CYCLE		GOBP_CELL_CYCLE
14211	Smc2	structural maintenance of chromosomes 2 [Source:MGI Symbol;Acc:MGI:106067]	GOBP_MITOTIC_CELL_CYCLE_PROCESS	GOBP_MITOTIC_CELL_CYCLE			GOBP_CELL_CYCLE_PROCESS		REACTOME_CELL_CYCLE		GOBP_CELL_CYCLE
68612	Ube2c	ubiquitin-conjugating enzyme E2C [Source:MGI Symbol;Acc:MGI:1915862]	GOBP_MITOTIC_CELL_CYCLE_PROCESS	GOBP_MITOTIC_CELL_CYCLE			GOBP_CELL_CYCLE_PROCESS		REACTOME_CELL_CYCLE		GOBP_CELL_CYCLE
215387	Ncaph	non-SMC condensin I complex, subunit H [Source:MGI Symbol;Acc:MGI:2444777]	GOBP_MITOTIC_CELL_CYCLE_PROCESS	GOBP_MITOTIC_CELL_CYCLE			GOBP_CELL_CYCLE_PROCESS		REACTOME_CELL_CYCLE		GOBP_CELL_CYCLE
54392	Ncapg	non-SMC condensin I complex, subunit G [Source:MGI Symbol;Acc:MGI:1930197]	GOBP_MITOTIC_CELL_CYCLE_PROCESS	GOBP_MITOTIC_CELL_CYCLE			GOBP_CELL_CYCLE_PROCESS		REACTOME_CELL_CYCLE		GOBP_CELL_CYCLE
67121	Mastl	microtubule associated serine/threonine kinase-like [Source:MGI Symbol;Acc:MGI:1914371]	GOBP_MITOTIC_CELL_CYCLE_PROCESS	GOBP_MITOTIC_CELL_CYCLE			GOBP_CELL_CYCLE_PROCESS		REACTOME_CELL_CYCLE		GOBP_CELL_CYCLE
17215	Mcm3	minichromosome maintenance complex component 3 [Source:MGI Symbol;Acc:MGI:101845]	GOBP_MITOTIC_CELL_CYCLE_PROCESS	GOBP_MITOTIC_CELL_CYCLE			GOBP_CELL_CYCLE_PROCESS		REACTOME_CELL_CYCLE		GOBP_CELL_CYCLE
12567	Cdk4	cyclin-dependent kinase 4 [Source:MGI Symbol;Acc:MGI:88357]	GOBP_MITOTIC_CELL_CYCLE_PROCESS	GOBP_MITOTIC_CELL_CYCLE			GOBP_CELL_CYCLE_PROCESS		REACTOME_CELL_CYCLE		GOBP_CELL_CYCLE
16881	Lig1	ligase I, DNA, ATP-dependent [Source:MGI Symbol;Acc:MGI:101789]	GOBP_MITOTIC_CELL_CYCLE_PROCESS	GOBP_MITOTIC_CELL_CYCLE			GOBP_CELL_CYCLE_PROCESS		REACTOME_CELL_CYCLE		GOBP_CELL_CYCLE
12444	Ccnd2	cyclin D2 [Source:MGI Symbol;Acc:MGI:88314]	GOBP_MITOTIC_CELL_CYCLE_PROCESS	GOBP_MITOTIC_CELL_CYCLE			GOBP_CELL_CYCLE_PROCESS		REACTOME_CELL_CYCLE		GOBP_CELL_CYCLE
12532	Cdc25c	cell division cycle 25C [Source:MGI Symbol;Acc:MGI:88350]	GOBP_MITOTIC_CELL_CYCLE_PROCESS	GOBP_MITOTIC_CELL_CYCLE			GOBP_CELL_CYCLE_PROCESS		REACTOME_CELL_CYCLE		GOBP_CELL_CYCLE
12428	Ccna2	cyclin A2 [Source:MGI Symbol;Acc:MGI:108069]	GOBP_MITOTIC_CELL_CYCLE_PROCESS	GOBP_MITOTIC_CELL_CYCLE			GOBP_CELL_CYCLE_PROCESS		REACTOME_CELL_CYCLE		GOBP_CELL_CYCLE
54124	Cks1b	CDC28 protein kinase 1b [Source:MGI Symbol;Acc:MGI:1889208]	GOBP_MITOTIC_CELL_CYCLE_PROCESS	GOBP_MITOTIC_CELL_CYCLE			GOBP_CELL_CYCLE_PROCESS		REACTOME_CELL_CYCLE		GOBP_CELL_CYCLE
17216	Mcm2	minichromosome maintenance complex component 2 [Source:MGI Symbol;Acc:MGI:105380]	GOBP_MITOTIC_CELL_CYCLE_PROCESS	GOBP_MITOTIC_CELL_CYCLE			GOBP_CELL_CYCLE_PROCESS		REACTOME_CELL_CYCLE		GOBP_CELL_CYCLE
17217	Mcm4	minichromosome maintenance complex component 4 [Source:MGI Symbol;Acc:MGI:103199]	GOBP_MITOTIC_CELL_CYCLE_PROCESS	GOBP_MITOTIC_CELL_CYCLE			GOBP_CELL_CYCLE_PROCESS		REACTOME_CELL_CYCLE		GOBP_CELL_CYCLE
17219	Mcm6	minichromosome maintenance complex component 6 [Source:MGI Symbol;Acc:MGI:1298227]	GOBP_MITOTIC_CELL_CYCLE_PROCESS	GOBP_MITOTIC_CELL_CYCLE			GOBP_CELL_CYCLE_PROCESS		REACTOME_CELL_CYCLE		GOBP_CELL_CYCLE
27214	Dbf4	DBF4 zinc finger [Source:MGI Symbol;Acc:MGI:1351328]	GOBP_MITOTIC_CELL_CYCLE_PROCESS	GOBP_MITOTIC_CELL_CYCLE			GOBP_CELL_CYCLE_PROCESS		REACTOME_CELL_CYCLE		GOBP_CELL_CYCLE
14235	Foxm1	forkhead box M1 [Source:MGI Symbol;Acc:MGI:1347487]	GOBP_MITOTIC_CELL_CYCLE_PROCESS	GOBP_MITOTIC_CELL_CYCLE			GOBP_CELL_CYCLE_PROCESS		REACTOME_CELL_CYCLE		GOBP_CELL_CYCLE
18973	Pole	polymerase (DNA directed), epsilon [Source:MGI Symbol;Acc:MGI:1196391]	GOBP_MITOTIC_CELL_CYCLE_PROCESS	GOBP_MITOTIC_CELL_CYCLE			GOBP_CELL_CYCLE_PROCESS				GOBP_CELL_CYCLE
108912	Cdca2	cell division cycle associated 2 [Source:MGI Symbol;Acc:MGI:1919787]	GOBP_MITOTIC_CELL_CYCLE_PROCESS	GOBP_MITOTIC_CELL_CYCLE			GOBP_CELL_CYCLE_PROCESS				GOBP_CELL_CYCLE
17345	Mki67	antigen identified by monoclonal antibody Ki 67 [Source:MGI Symbol;Acc:MGI:106035]	GOBP_MITOTIC_CELL_CYCLE_PROCESS	GOBP_MITOTIC_CELL_CYCLE			GOBP_CELL_CYCLE_PROCESS				GOBP_CELL_CYCLE
76843	Dtl	denticleless E3 ubiquitin protein ligase [Source:MGI Symbol;Acc:MGI:1924093]	GOBP_MITOTIC_CELL_CYCLE_PROCESS	GOBP_MITOTIC_CELL_CYCLE			GOBP_CELL_CYCLE_PROCESS				GOBP_CELL_CYCLE
18647	Cdk14	cyclin-dependent kinase 14 [Source:MGI Symbol;Acc:MGI:894318]	GOBP_MITOTIC_CELL_CYCLE_PROCESS	GOBP_MITOTIC_CELL_CYCLE			GOBP_CELL_CYCLE_PROCESS				GOBP_CELL_CYCLE
18557	Cdk18	cyclin-dependent kinase 18 [Source:MGI Symbol;Acc:MGI:97518]	GOBP_MITOTIC_CELL_CYCLE_PROCESS	GOBP_MITOTIC_CELL_CYCLE			GOBP_CELL_CYCLE_PROCESS				GOBP_CELL_CYCLE
20135	Rrm2	ribonucleotide reductase M2 [Source:MGI Symbol;Acc:MGI:98181]	GOBP_MITOTIC_CELL_CYCLE_PROCESS	GOBP_MITOTIC_CELL_CYCLE			GOBP_CELL_CYCLE_PROCESS				GOBP_CELL_CYCLE
77011	Ticrr	TOPBP1-interacting checkpoint and replication regulator [Source:MGI Symbol;Acc:MGI:1924261]	GOBP_MITOTIC_CELL_CYCLE_PROCESS	GOBP_MITOTIC_CELL_CYCLE			GOBP_CELL_CYCLE_PROCESS	GOBP_CELL_PROJECTION_ORGANIZATION	REACTOME_CELL_CYCLE		GOBP_CELL_CYCLE
22152	Tubb3	tubulin, beta 3 class III [Source:MGI Symbol;Acc:MGI:107813]		GOBP_MITOTIC_CELL_CYCLE	GOBP_CYTOSKELETON_ORGANIZATION	GOBP_NEUROGENESIS		GOBP_CELL_PROJECTION_ORGANIZATION	REACTOME_CELL_CYCLE	GOBP_GENERATION_OF_NEURONS	GOBP_CELL_CYCLE	GOBP_NEURON_DEVELOPMENT
22390	Wee1	WEE 1 homolog 1 (S. pombe) [Source:MGI Symbol;Acc:MGI:103075]		GOBP_MITOTIC_CELL_CYCLE	GOBP_CYTOSKELETON_ORGANIZATION	GOBP_NEUROGENESIS			REACTOME_CELL_CYCLE	GOBP_GENERATION_OF_NEURONS	GOBP_CELL_CYCLE	GOBP_NEURON_DEVELOPMENT
22154	Tubb5	tubulin, beta 5 class I [Source:MGI Symbol;Acc:MGI:107812]		GOBP_MITOTIC_CELL_CYCLE	GOBP_CYTOSKELETON_ORGANIZATION		GOBP_CELL_CYCLE_PROCESS				GOBP_CELL_CYCLE
108961	E2f8	E2F transcription factor 8 [Source:MGI Symbol;Acc:MGI:1922038]		GOBP_MITOTIC_CELL_CYCLE			GOBP_CELL_CYCLE_PROCESS	GOBP_CELL_PROJECTION_ORGANIZATION			GOBP_CELL_CYCLE
14609	Gja1	gap junction protein, alpha 1 [Source:MGI Symbol;Acc:MGI:95713]			GOBP_CYTOSKELETON_ORGANIZATION	GOBP_NEUROGENESIS	GOBP_CELL_CYCLE_PROCESS			GOBP_GENERATION_OF_NEURONS	GOBP_CELL_CYCLE	GOBP_NEURON_DEVELOPMENT
12316	Aspm	abnormal spindle microtubule assembly [Source:MGI Symbol;Acc:MGI:1334448]			GOBP_CYTOSKELETON_ORGANIZATION	GOBP_NEUROGENESIS	GOBP_CELL_CYCLE_PROCESS	GOBP_CELL_PROJECTION_ORGANIZATION		GOBP_GENERATION_OF_NEURONS	GOBP_CELL_CYCLE
17118	Marcks	myristoylated alanine rich protein kinase C substrate [Source:MGI Symbol;Acc:MGI:96907]			GOBP_CYTOSKELETON_ORGANIZATION	GOBP_NEUROGENESIS		GOBP_CELL_PROJECTION_ORGANIZATION		GOBP_GENERATION_OF_NEURONS		GOBP_NEURON_DEVELOPMENT
13193	Dcx	doublecortin [Source:MGI Symbol;Acc:MGI:1277171]			GOBP_CYTOSKELETON_ORGANIZATION	GOBP_NEUROGENESIS		GOBP_CELL_PROJECTION_ORGANIZATION		GOBP_GENERATION_OF_NEURONS		GOBP_NEURON_DEVELOPMENT
17920	Myo6	myosin VI [Source:MGI Symbol;Acc:MGI:104785]			GOBP_CYTOSKELETON_ORGANIZATION	GOBP_NEUROGENESIS		GOBP_CELL_PROJECTION_ORGANIZATION		GOBP_GENERATION_OF_NEURONS		GOBP_NEURON_DEVELOPMENT
22240	Dpysl3	dihydropyrimidinase-like 3 [Source:MGI Symbol;Acc:MGI:1349762]			GOBP_CYTOSKELETON_ORGANIZATION	GOBP_NEUROGENESIS		GOBP_CELL_PROJECTION_ORGANIZATION		GOBP_GENERATION_OF_NEURONS		GOBP_NEURON_DEVELOPMENT
12808	Cobl	cordon-bleu WH2 repeat [Source:MGI Symbol;Acc:MGI:105056]			GOBP_CYTOSKELETON_ORGANIZATION	GOBP_NEUROGENESIS		GOBP_CELL_PROJECTION_ORGANIZATION		GOBP_GENERATION_OF_NEURONS		GOBP_NEURON_DEVELOPMENT
14457	Gas7	growth arrest specific 7 [Source:MGI Symbol;Acc:MGI:1202388]			GOBP_CYTOSKELETON_ORGANIZATION	GOBP_NEUROGENESIS		GOBP_CELL_PROJECTION_ORGANIZATION		GOBP_GENERATION_OF_NEURONS		GOBP_NEURON_DEVELOPMENT
12799	Cnp	2',3'-cyclic nucleotide 3' phosphodiesterase [Source:MGI Symbol;Acc:MGI:88437]			GOBP_CYTOSKELETON_ORGANIZATION	GOBP_NEUROGENESIS		GOBP_CELL_PROJECTION_ORGANIZATION		GOBP_GENERATION_OF_NEURONS		GOBP_NEURON_DEVELOPMENT
14083	Ptk2	PTK2 protein tyrosine kinase 2 [Source:MGI Symbol;Acc:MGI:95481]			GOBP_CYTOSKELETON_ORGANIZATION	GOBP_NEUROGENESIS		GOBP_CELL_PROJECTION_ORGANIZATION		GOBP_GENERATION_OF_NEURONS		GOBP_NEURON_DEVELOPMENT
12933	Crmp1	collapsin response mediator protein 1 [Source:MGI Symbol;Acc:MGI:107793]			GOBP_CYTOSKELETON_ORGANIZATION	GOBP_NEUROGENESIS		GOBP_CELL_PROJECTION_ORGANIZATION		GOBP_GENERATION_OF_NEURONS		GOBP_NEURON_DEVELOPMENT
13823	Epb41l3	erythrocyte membrane protein band 4.1 like 3 [Source:MGI Symbol;Acc:MGI:103008]			GOBP_CYTOSKELETON_ORGANIZATION	GOBP_NEUROGENESIS		GOBP_CELL_PROJECTION_ORGANIZATION		GOBP_GENERATION_OF_NEURONS		GOBP_NEURON_DEVELOPMENT
226251	Ablim1	actin-binding LIM protein 1 [Source:MGI Symbol;Acc:MGI:1194500]			GOBP_CYTOSKELETON_ORGANIZATION	GOBP_NEUROGENESIS		GOBP_CELL_PROJECTION_ORGANIZATION		GOBP_GENERATION_OF_NEURONS		GOBP_NEURON_DEVELOPMENT
18762	Prkcz	protein kinase C, zeta [Source:MGI Symbol;Acc:MGI:97602]			GOBP_CYTOSKELETON_ORGANIZATION	GOBP_NEUROGENESIS		GOBP_CELL_PROJECTION_ORGANIZATION		GOBP_GENERATION_OF_NEURONS		GOBP_NEURON_DEVELOPMENT
13837	Epha3	Eph receptor A3 [Source:MGI Symbol;Acc:MGI:99612]			GOBP_CYTOSKELETON_ORGANIZATION	GOBP_NEUROGENESIS		GOBP_CELL_PROJECTION_ORGANIZATION		GOBP_GENERATION_OF_NEURONS		GOBP_NEURON_DEVELOPMENT
56013	Srcin1	SRC kinase signaling inhibitor 1 [Source:MGI Symbol;Acc:MGI:1933179]			GOBP_CYTOSKELETON_ORGANIZATION	GOBP_NEUROGENESIS		GOBP_CELL_PROJECTION_ORGANIZATION		GOBP_GENERATION_OF_NEURONS		GOBP_NEURON_DEVELOPMENT
14745	Lpar1	lysophosphatidic acid receptor 1 [Source:MGI Symbol;Acc:MGI:108429]			GOBP_CYTOSKELETON_ORGANIZATION	GOBP_NEUROGENESIS		GOBP_CELL_PROJECTION_ORGANIZATION		GOBP_GENERATION_OF_NEURONS		GOBP_NEURON_DEVELOPMENT
17242	Mdk	midkine [Source:MGI Symbol;Acc:MGI:96949]			GOBP_CYTOSKELETON_ORGANIZATION	GOBP_NEUROGENESIS		GOBP_CELL_PROJECTION_ORGANIZATION		GOBP_GENERATION_OF_NEURONS		GOBP_NEURON_DEVELOPMENT
110596	Arhgef28	Rho guanine nucleotide exchange factor (GEF) 28 [Source:MGI Symbol;Acc:MGI:1346016]			GOBP_CYTOSKELETON_ORGANIZATION	GOBP_NEUROGENESIS		GOBP_CELL_PROJECTION_ORGANIZATION		GOBP_GENERATION_OF_NEURONS		GOBP_NEURON_DEVELOPMENT
22239	Ugt8a	UDP galactosyltransferase 8A [Source:MGI Symbol;Acc:MGI:109522]			GOBP_CYTOSKELETON_ORGANIZATION	GOBP_NEUROGENESIS		GOBP_CELL_PROJECTION_ORGANIZATION		GOBP_GENERATION_OF_NEURONS		GOBP_NEURON_DEVELOPMENT
170835	Inpp5j	inositol polyphosphate 5-phosphatase J [Source:MGI Symbol;Acc:MGI:2158663]			GOBP_CYTOSKELETON_ORGANIZATION	GOBP_NEUROGENESIS		GOBP_CELL_PROJECTION_ORGANIZATION		GOBP_GENERATION_OF_NEURONS		GOBP_NEURON_DEVELOPMENT
14758	Gpm6b	glycoprotein m6b [Source:MGI Symbol;Acc:MGI:107672]			GOBP_CYTOSKELETON_ORGANIZATION	GOBP_NEUROGENESIS		GOBP_CELL_PROJECTION_ORGANIZATION		GOBP_GENERATION_OF_NEURONS		GOBP_NEURON_DEVELOPMENT
76441	Daam2	dishevelled associated activator of morphogenesis 2 [Source:MGI Symbol;Acc:MGI:1923691]			GOBP_CYTOSKELETON_ORGANIZATION	GOBP_NEUROGENESIS
68026	Pclaf	PCNA clamp associated factor [Source:MGI Symbol;Acc:MGI:1915276]			GOBP_CYTOSKELETON_ORGANIZATION		GOBP_CELL_CYCLE_PROCESS	GOBP_CELL_PROJECTION_ORGANIZATION			GOBP_CELL_CYCLE
231148	Ablim2	actin-binding LIM protein 2 [Source:MGI Symbol;Acc:MGI:2385758]			GOBP_CYTOSKELETON_ORGANIZATION			GOBP_CELL_PROJECTION_ORGANIZATION
68922	Dnai1	dynein axonemal intermediate chain 1 [Source:MGI Symbol;Acc:MGI:1916172]			GOBP_CYTOSKELETON_ORGANIZATION			GOBP_CELL_PROJECTION_ORGANIZATION
12345	Capzb	capping actin protein of muscle Z-line subunit beta [Source:MGI Symbol;Acc:MGI:104652]			GOBP_CYTOSKELETON_ORGANIZATION			GOBP_CELL_PROJECTION_ORGANIZATION
23790	Coro1c	coronin, actin binding protein 1C [Source:MGI Symbol;Acc:MGI:1345964]			GOBP_CYTOSKELETON_ORGANIZATION			GOBP_CELL_PROJECTION_ORGANIZATION
65970	Lima1	LIM domain and actin binding 1 [Source:MGI Symbol;Acc:MGI:1920992]			GOBP_CYTOSKELETON_ORGANIZATION			GOBP_CELL_PROJECTION_ORGANIZATION
227753	Gsn	gelsolin [Source:MGI Symbol;Acc:MGI:95851]			GOBP_CYTOSKELETON_ORGANIZATION			GOBP_CELL_PROJECTION_ORGANIZATION
104252	Cdc42ep2	CDC42 effector protein (Rho GTPase binding) 2 [Source:MGI Symbol;Acc:MGI:1929744]			GOBP_CYTOSKELETON_ORGANIZATION
72205	Eml2	echinoderm microtubule associated protein like 2 [Source:MGI Symbol;Acc:MGI:1919455]			GOBP_CYTOSKELETON_ORGANIZATION
17318	Mid1	midline 1 [Source:MGI Symbol;Acc:MGI:1100537]			GOBP_CYTOSKELETON_ORGANIZATION
208158	Map6d1	MAP6 domain containing 1 [Source:MGI Symbol;Acc:MGI:3607784]			GOBP_CYTOSKELETON_ORGANIZATION
237436	Gas2l3	growth arrest-specific 2 like 3 [Source:MGI Symbol;Acc:MGI:1918780]			GOBP_CYTOSKELETON_ORGANIZATION
67971	Tppp3	tubulin polymerization-promoting protein family member 3 [Source:MGI Symbol;Acc:MGI:1915221]			GOBP_CYTOSKELETON_ORGANIZATION
71960	Myh14	myosin, heavy polypeptide 14 [Source:MGI Symbol;Acc:MGI:1919210]			GOBP_CYTOSKELETON_ORGANIZATION
21916	Tmod1	tropomodulin 1 [Source:MGI Symbol;Acc:MGI:98775]			GOBP_CYTOSKELETON_ORGANIZATION
74103	Nebl	nebulette [Source:MGI Symbol;Acc:MGI:1921353]			GOBP_CYTOSKELETON_ORGANIZATION
19201	Pstpip2	proline-serine-threonine phosphatase-interacting protein 2 [Source:MGI Symbol;Acc:MGI:1335088]			GOBP_CYTOSKELETON_ORGANIZATION
213019	Pdlim2	PDZ and LIM domain 2 [Source:MGI Symbol;Acc:MGI:2384850]			GOBP_CYTOSKELETON_ORGANIZATION
17761	Map7	microtubule-associated protein 7 [Source:MGI Symbol;Acc:MGI:1328328]			GOBP_CYTOSKELETON_ORGANIZATION
223915	Krt73	keratin 73 [Source:MGI Symbol;Acc:MGI:3607712]			GOBP_CYTOSKELETON_ORGANIZATION
338367	Myo1d	myosin ID [Source:MGI Symbol;Acc:MGI:107728]			GOBP_CYTOSKELETON_ORGANIZATION
70435	Inf2	inverted formin, FH2 and WH2 domain containing [Source:MGI Symbol;Acc:MGI:1917685]			GOBP_CYTOSKELETON_ORGANIZATION
243621	Iqsec3	IQ motif and Sec7 domain 3 [Source:MGI Symbol;Acc:MGI:2677208]			GOBP_CYTOSKELETON_ORGANIZATION
102693	Phldb1	pleckstrin homology like domain, family B, member 1 [Source:MGI Symbol;Acc:MGI:2143230]			GOBP_CYTOSKELETON_ORGANIZATION
21333	Tac1	tachykinin 1 [Source:MGI Symbol;Acc:MGI:98474]			GOBP_CYTOSKELETON_ORGANIZATION
677884	Pakap	paralemmin A kinase anchor protein [Source:MGI Symbol;Acc:MGI:5141924]			GOBP_CYTOSKELETON_ORGANIZATION
74137	Nuak2	NUAK family, SNF1-like kinase, 2 [Source:MGI Symbol;Acc:MGI:1921387]			GOBP_CYTOSKELETON_ORGANIZATION
213649	Arhgef19	Rho guanine nucleotide exchange factor (GEF) 19 [Source:MGI Symbol;Acc:MGI:1925912]			GOBP_CYTOSKELETON_ORGANIZATION
233877	Kctd13	potassium channel tetramerisation domain containing 13 [Source:MGI Symbol;Acc:MGI:1923739]			GOBP_CYTOSKELETON_ORGANIZATION
140580	Elmo1	engulfment and cell motility 1 [Source:MGI Symbol;Acc:MGI:2153044]			GOBP_CYTOSKELETON_ORGANIZATION			GOBP_CELL_PROJECTION_ORGANIZATION	REACTOME_CELL_CYCLE
15519	Hsp90aa1	heat shock protein 90, alpha (cytosolic), class A member 1 [Source:MGI Symbol;Acc:MGI:96250]				GOBP_NEUROGENESIS		GOBP_CELL_PROJECTION_ORGANIZATION		GOBP_GENERATION_OF_NEURONS		GOBP_NEURON_DEVELOPMENT
13405	Dmd	dystrophin, muscular dystrophy [Source:MGI Symbol;Acc:MGI:94909]				GOBP_NEUROGENESIS		GOBP_CELL_PROJECTION_ORGANIZATION		GOBP_GENERATION_OF_NEURONS	GOBP_CELL_CYCLE	GOBP_NEURON_DEVELOPMENT
50791	Magi2	membrane associated guanylate kinase, WW and PDZ domain containing 2 [Source:MGI Symbol;Acc:MGI:1354953]				GOBP_NEUROGENESIS		GOBP_CELL_PROJECTION_ORGANIZATION		GOBP_GENERATION_OF_NEURONS		GOBP_NEURON_DEVELOPMENT
233489	Picalm	phosphatidylinositol binding clathrin assembly protein [Source:MGI Symbol;Acc:MGI:2385902]				GOBP_NEUROGENESIS		GOBP_CELL_PROJECTION_ORGANIZATION		GOBP_GENERATION_OF_NEURONS		GOBP_NEURON_DEVELOPMENT
13844	Ephb2	Eph receptor B2 [Source:MGI Symbol;Acc:MGI:99611]				GOBP_NEUROGENESIS		GOBP_CELL_PROJECTION_ORGANIZATION		GOBP_GENERATION_OF_NEURONS		GOBP_NEURON_DEVELOPMENT
234267	Gpm6a	glycoprotein m6a [Source:MGI Symbol;Acc:MGI:107671]				GOBP_NEUROGENESIS		GOBP_CELL_PROJECTION_ORGANIZATION		GOBP_GENERATION_OF_NEURONS		GOBP_NEURON_DEVELOPMENT
171171	Ntng2	netrin G2 [Source:MGI Symbol;Acc:MGI:2159341]				GOBP_NEUROGENESIS		GOBP_CELL_PROJECTION_ORGANIZATION		GOBP_GENERATION_OF_NEURONS		GOBP_NEURON_DEVELOPMENT
19277	Ptpro	protein tyrosine phosphatase, receptor type, O [Source:MGI Symbol;Acc:MGI:1097152]				GOBP_NEUROGENESIS		GOBP_CELL_PROJECTION_ORGANIZATION		GOBP_GENERATION_OF_NEURONS		GOBP_NEURON_DEVELOPMENT
17967	Ncam1	neural cell adhesion molecule 1 [Source:MGI Symbol;Acc:MGI:97281]				GOBP_NEUROGENESIS		GOBP_CELL_PROJECTION_ORGANIZATION		GOBP_GENERATION_OF_NEURONS		GOBP_NEURON_DEVELOPMENT
545156	Kalrn	kalirin, RhoGEF kinase [Source:MGI Symbol;Acc:MGI:2685385]				GOBP_NEUROGENESIS		GOBP_CELL_PROJECTION_ORGANIZATION		GOBP_GENERATION_OF_NEURONS		GOBP_NEURON_DEVELOPMENT
210293	Dock10	dedicator of cytokinesis 10 [Source:MGI Symbol;Acc:MGI:2146320]				GOBP_NEUROGENESIS		GOBP_CELL_PROJECTION_ORGANIZATION		GOBP_GENERATION_OF_NEURONS		GOBP_NEURON_DEVELOPMENT
67703	Kirrel3	kirre like nephrin family adhesion molecule 3 [Source:MGI Symbol;Acc:MGI:1914953]				GOBP_NEUROGENESIS		GOBP_CELL_PROJECTION_ORGANIZATION		GOBP_GENERATION_OF_NEURONS		GOBP_NEURON_DEVELOPMENT
78829	Spacdr	sperm acrosome developmental regulator [Source:MGI Symbol;Acc:MGI:1926079]				GOBP_NEUROGENESIS		GOBP_CELL_PROJECTION_ORGANIZATION		GOBP_GENERATION_OF_NEURONS		GOBP_NEURON_DEVELOPMENT
19266	Ptprd	protein tyrosine phosphatase, receptor type, D [Source:MGI Symbol;Acc:MGI:97812]				GOBP_NEUROGENESIS		GOBP_CELL_PROJECTION_ORGANIZATION		GOBP_GENERATION_OF_NEURONS		GOBP_NEURON_DEVELOPMENT
13643	Efnb3	ephrin B3 [Source:MGI Symbol;Acc:MGI:109196]				GOBP_NEUROGENESIS		GOBP_CELL_PROJECTION_ORGANIZATION		GOBP_GENERATION_OF_NEURONS		GOBP_NEURON_DEVELOPMENT
20745	Spock1	sparc/osteonectin, cwcv and kazal-like domains proteoglycan 1 [Source:MGI Symbol;Acc:MGI:105371]				GOBP_NEUROGENESIS		GOBP_CELL_PROJECTION_ORGANIZATION		GOBP_GENERATION_OF_NEURONS		GOBP_NEURON_DEVELOPMENT
235106	Ntm	neurotrimin [Source:MGI Symbol;Acc:MGI:2446259]				GOBP_NEUROGENESIS		GOBP_CELL_PROJECTION_ORGANIZATION		GOBP_GENERATION_OF_NEURONS		GOBP_NEURON_DEVELOPMENT
20370	Sez6	seizure related gene 6 [Source:MGI Symbol;Acc:MGI:104745]				GOBP_NEUROGENESIS		GOBP_CELL_PROJECTION_ORGANIZATION		GOBP_GENERATION_OF_NEURONS		GOBP_NEURON_DEVELOPMENT
19317	Qki	quaking, KH domain containing RNA binding [Source:MGI Symbol;Acc:MGI:97837]				GOBP_NEUROGENESIS		GOBP_CELL_PROJECTION_ORGANIZATION		GOBP_GENERATION_OF_NEURONS		GOBP_NEURON_DEVELOPMENT
17196	Mbp	myelin basic protein [Source:MGI Symbol;Acc:MGI:96925]				GOBP_NEUROGENESIS		GOBP_CELL_PROJECTION_ORGANIZATION		GOBP_GENERATION_OF_NEURONS		GOBP_NEURON_DEVELOPMENT
54652	Cacna1f	calcium channel, voltage-dependent, alpha 1F subunit [Source:MGI Symbol;Acc:MGI:1859639]				GOBP_NEUROGENESIS		GOBP_CELL_PROJECTION_ORGANIZATION		GOBP_GENERATION_OF_NEURONS		GOBP_NEURON_DEVELOPMENT
20354	Sema4d	sema domain, immunoglobulin domain (Ig), transmembrane domain (TM) and short cytoplasmic domain, (semaphorin) 4D [Source:MGI Symbol;Acc:MGI:109244]				GOBP_NEUROGENESIS		GOBP_CELL_PROJECTION_ORGANIZATION		GOBP_GENERATION_OF_NEURONS		GOBP_NEURON_DEVELOPMENT
140571	Plxnb3	plexin B3 [Source:MGI Symbol;Acc:MGI:2154240]				GOBP_NEUROGENESIS		GOBP_CELL_PROJECTION_ORGANIZATION		GOBP_GENERATION_OF_NEURONS		GOBP_NEURON_DEVELOPMENT
18845	Plxna2	plexin A2 [Source:MGI Symbol;Acc:MGI:107684]				GOBP_NEUROGENESIS		GOBP_CELL_PROJECTION_ORGANIZATION		GOBP_GENERATION_OF_NEURONS		GOBP_NEURON_DEVELOPMENT
20351	Sema4a	sema domain, immunoglobulin domain (Ig), transmembrane domain (TM) and short cytoplasmic domain, (semaphorin) 4A [Source:MGI Symbol;Acc:MGI:107560]				GOBP_NEUROGENESIS		GOBP_CELL_PROJECTION_ORGANIZATION		GOBP_GENERATION_OF_NEURONS		GOBP_NEURON_DEVELOPMENT
20562	Slit1	slit guidance ligand 1 [Source:MGI Symbol;Acc:MGI:1315203]				GOBP_NEUROGENESIS		GOBP_CELL_PROJECTION_ORGANIZATION		GOBP_GENERATION_OF_NEURONS		GOBP_NEURON_DEVELOPMENT
70433	Draxin	dorsal inhibitory axon guidance protein [Source:MGI Symbol;Acc:MGI:1917683]				GOBP_NEUROGENESIS		GOBP_CELL_PROJECTION_ORGANIZATION		GOBP_GENERATION_OF_NEURONS		GOBP_NEURON_DEVELOPMENT
27279	Tnfrsf12a	tumor necrosis factor receptor superfamily, member 12a [Source:MGI Symbol;Acc:MGI:1351484]				GOBP_NEUROGENESIS		GOBP_CELL_PROJECTION_ORGANIZATION		GOBP_GENERATION_OF_NEURONS		GOBP_NEURON_DEVELOPMENT
94253	Hecw1	HECT, C2 and WW domain containing E3 ubiquitin protein ligase 1 [Source:MGI Symbol;Acc:MGI:2444115]				GOBP_NEUROGENESIS		GOBP_CELL_PROJECTION_ORGANIZATION		GOBP_GENERATION_OF_NEURONS		GOBP_NEURON_DEVELOPMENT
16774	Lama3	laminin, alpha 3 [Source:MGI Symbol;Acc:MGI:99909]				GOBP_NEUROGENESIS		GOBP_CELL_PROJECTION_ORGANIZATION		GOBP_GENERATION_OF_NEURONS		GOBP_NEURON_DEVELOPMENT
107934	Celsr3	cadherin, EGF LAG seven-pass G-type receptor 3 [Source:MGI Symbol;Acc:MGI:1858236]				GOBP_NEUROGENESIS		GOBP_CELL_PROJECTION_ORGANIZATION		GOBP_GENERATION_OF_NEURONS		GOBP_NEURON_DEVELOPMENT
16869	Lhx1	LIM homeobox protein 1 [Source:MGI Symbol;Acc:MGI:99783]				GOBP_NEUROGENESIS		GOBP_CELL_PROJECTION_ORGANIZATION		GOBP_GENERATION_OF_NEURONS		GOBP_NEURON_DEVELOPMENT
211187	Lrtm2	leucine-rich repeats and transmembrane domains 2 [Source:MGI Symbol;Acc:MGI:2141485]				GOBP_NEUROGENESIS		GOBP_CELL_PROJECTION_ORGANIZATION		GOBP_GENERATION_OF_NEURONS		GOBP_NEURON_DEVELOPMENT
18612	Etv4	ets variant 4 [Source:MGI Symbol;Acc:MGI:99423]				GOBP_NEUROGENESIS		GOBP_CELL_PROJECTION_ORGANIZATION		GOBP_GENERATION_OF_NEURONS		GOBP_NEURON_DEVELOPMENT
77018	Col25a1	collagen, type XXV, alpha 1 [Source:MGI Symbol;Acc:MGI:1924268]				GOBP_NEUROGENESIS		GOBP_CELL_PROJECTION_ORGANIZATION		GOBP_GENERATION_OF_NEURONS		GOBP_NEURON_DEVELOPMENT
19417	Rasgrf1	RAS protein-specific guanine nucleotide-releasing factor 1 [Source:MGI Symbol;Acc:MGI:99694]				GOBP_NEUROGENESIS		GOBP_CELL_PROJECTION_ORGANIZATION		GOBP_GENERATION_OF_NEURONS		GOBP_NEURON_DEVELOPMENT
19205	Ptbp1	polypyrimidine tract binding protein 1 [Source:MGI Symbol;Acc:MGI:97791]				GOBP_NEUROGENESIS		GOBP_CELL_PROJECTION_ORGANIZATION		GOBP_GENERATION_OF_NEURONS		GOBP_NEURON_DEVELOPMENT
12484	Cd24a	CD24a antigen [Source:MGI Symbol;Acc:MGI:88323]				GOBP_NEUROGENESIS		GOBP_CELL_PROJECTION_ORGANIZATION		GOBP_GENERATION_OF_NEURONS		GOBP_NEURON_DEVELOPMENT
18806	Pld2	phospholipase D2 [Source:MGI Symbol;Acc:MGI:892877]				GOBP_NEUROGENESIS		GOBP_CELL_PROJECTION_ORGANIZATION		GOBP_GENERATION_OF_NEURONS		GOBP_NEURON_DEVELOPMENT
11606	Agt	angiotensinogen (serpin peptidase inhibitor, clade A, member 8) [Source:MGI Symbol;Acc:MGI:87963]				GOBP_NEUROGENESIS		GOBP_CELL_PROJECTION_ORGANIZATION		GOBP_GENERATION_OF_NEURONS		GOBP_NEURON_DEVELOPMENT
75769	Plppr5	phospholipid phosphatase related 5 [Source:MGI Symbol;Acc:MGI:1923019]				GOBP_NEUROGENESIS		GOBP_CELL_PROJECTION_ORGANIZATION		GOBP_GENERATION_OF_NEURONS		GOBP_NEURON_DEVELOPMENT
19144	Klk6	kallikrein related-peptidase 6 [Source:MGI Symbol;Acc:MGI:1343166]				GOBP_NEUROGENESIS		GOBP_CELL_PROJECTION_ORGANIZATION		GOBP_GENERATION_OF_NEURONS		GOBP_NEURON_DEVELOPMENT
192897	Itgb4	integrin beta 4 [Source:MGI Symbol;Acc:MGI:96613]				GOBP_NEUROGENESIS		GOBP_CELL_PROJECTION_ORGANIZATION
14811	Grin2a	glutamate receptor, ionotropic, NMDA2A (epsilon 1) [Source:MGI Symbol;Acc:MGI:95820]				GOBP_NEUROGENESIS			REACTOME_CELL_CYCLE
11652	Akt2	thymoma viral proto-oncogene 2 [Source:MGI Symbol;Acc:MGI:104874]				GOBP_NEUROGENESIS
16531	Kcnma1	potassium large conductance calcium-activated channel, subfamily M, alpha member 1 [Source:MGI Symbol;Acc:MGI:99923]				GOBP_NEUROGENESIS				GOBP_GENERATION_OF_NEURONS		GOBP_NEURON_DEVELOPMENT
23859	Dlg2	discs large MAGUK scaffold protein 2 [Source:MGI Symbol;Acc:MGI:1344351]				GOBP_NEUROGENESIS				GOBP_GENERATION_OF_NEURONS		GOBP_NEURON_DEVELOPMENT
218756	Slc4a7	solute carrier family 4, sodium bicarbonate cotransporter, member 7 [Source:MGI Symbol;Acc:MGI:2443878]				GOBP_NEUROGENESIS				GOBP_GENERATION_OF_NEURONS		GOBP_NEURON_DEVELOPMENT
72393	Faim2	Fas apoptotic inhibitory molecule 2 [Source:MGI Symbol;Acc:MGI:1919643]				GOBP_NEUROGENESIS				GOBP_GENERATION_OF_NEURONS
20408	Sh3gl3	SH3-domain GRB2-like 3 [Source:MGI Symbol;Acc:MGI:700011]				GOBP_NEUROGENESIS				GOBP_GENERATION_OF_NEURONS
14456	Gas6	growth arrest specific 6 [Source:MGI Symbol;Acc:MGI:95660]				GOBP_NEUROGENESIS				GOBP_GENERATION_OF_NEURONS
20677	Sox4	SRY (sex determining region Y)-box 4 [Source:MGI Symbol;Acc:MGI:98366]				GOBP_NEUROGENESIS				GOBP_GENERATION_OF_NEURONS
20665	Sox10	SRY (sex determining region Y)-box 10 [Source:MGI Symbol;Acc:MGI:98358]				GOBP_NEUROGENESIS				GOBP_GENERATION_OF_NEURONS
20666	Sox11	SRY (sex determining region Y)-box 11 [Source:MGI Symbol;Acc:MGI:98359]				GOBP_NEUROGENESIS				GOBP_GENERATION_OF_NEURONS
13392	Dlx2	distal-less homeobox 2 [Source:MGI Symbol;Acc:MGI:94902]				GOBP_NEUROGENESIS				GOBP_GENERATION_OF_NEURONS
18125	Nos1	nitric oxide synthase 1, neuronal [Source:MGI Symbol;Acc:MGI:97360]				GOBP_NEUROGENESIS
11496	Adam22	a disintegrin and metallopeptidase domain 22 [Source:MGI Symbol;Acc:MGI:1340046]				GOBP_NEUROGENESIS
51886	Fubp1	far upstream element (FUSE) binding protein 1 [Source:MGI Symbol;Acc:MGI:1196294]				GOBP_NEUROGENESIS
13867	Erbb3	erb-b2 receptor tyrosine kinase 3 [Source:MGI Symbol;Acc:MGI:95411]				GOBP_NEUROGENESIS
53605	Nap1l1	nucleosome assembly protein 1-like 1 [Source:MGI Symbol;Acc:MGI:1855693]				GOBP_NEUROGENESIS
97165	Hmgb2	high mobility group box 2 [Source:MGI Symbol;Acc:MGI:96157]				GOBP_NEUROGENESIS
218772	Rarb	retinoic acid receptor, beta [Source:MGI Symbol;Acc:MGI:97857]				GOBP_NEUROGENESIS
225908	Myrf	myelin regulatory factor [Source:MGI Symbol;Acc:MGI:2684944]				GOBP_NEUROGENESIS			REACTOME_CELL_CYCLE
76464	Knl1	kinetochore scaffold 1 [Source:MGI Symbol;Acc:MGI:1923714]					GOBP_CELL_CYCLE_PROCESS		REACTOME_CELL_CYCLE		GOBP_CELL_CYCLE
381280	Hjurp	Holliday junction recognition protein [Source:MGI Symbol;Acc:MGI:2685821]					GOBP_CELL_CYCLE_PROCESS				GOBP_CELL_CYCLE
21973	Top2a	topoisomerase (DNA) II alpha [Source:MGI Symbol;Acc:MGI:98790]					GOBP_CELL_CYCLE_PROCESS				GOBP_CELL_CYCLE
19704	Upf1	UPF1 regulator of nonsense transcripts homolog (yeast) [Source:MGI Symbol;Acc:MGI:107995]					GOBP_CELL_CYCLE_PROCESS				GOBP_CELL_CYCLE
50915	Grb14	growth factor receptor bound protein 14 [Source:MGI Symbol;Acc:MGI:1355324]					GOBP_CELL_CYCLE_PROCESS	GOBP_CELL_PROJECTION_ORGANIZATION			GOBP_CELL_CYCLE
231807	Trappc14	trafficking protein particle complex 14 [Source:MGI Symbol;Acc:MGI:2385896]						GOBP_CELL_PROJECTION_ORGANIZATION
72938	Hspb11	heat shock protein family B (small), member 11 [Source:MGI Symbol;Acc:MGI:1920188]						GOBP_CELL_PROJECTION_ORGANIZATION
232975	Atp1a3	ATPase, Na+/K+ transporting, alpha 3 polypeptide [Source:MGI Symbol;Acc:MGI:88107]						GOBP_CELL_PROJECTION_ORGANIZATION
18805	Pld1	phospholipase D1 [Source:MGI Symbol;Acc:MGI:109585]						GOBP_CELL_PROJECTION_ORGANIZATION
27060	Tcirg1	T cell, immune regulator 1, ATPase, H+ transporting, lysosomal V0 protein A3 [Source:MGI Symbol;Acc:MGI:1350931]						GOBP_CELL_PROJECTION_ORGANIZATION
231532	Arhgap24	Rho GTPase activating protein 24 [Source:MGI Symbol;Acc:MGI:1922647]						GOBP_CELL_PROJECTION_ORGANIZATION
22325	Vav2	vav 2 oncogene [Source:MGI Symbol;Acc:MGI:102718]							REACTOME_CELL_CYCLE
17218	Mcm5	minichromosome maintenance complex component 5 [Source:MGI Symbol;Acc:MGI:103197]							REACTOME_CELL_CYCLE		GOBP_CELL_CYCLE
21781	Tfdp1	transcription factor Dp 1 [Source:MGI Symbol;Acc:MGI:101934]							REACTOME_CELL_CYCLE		GOBP_CELL_CYCLE
15366	Hmmr	hyaluronan mediated motility receptor (RHAMM) [Source:MGI Symbol;Acc:MGI:104667]							REACTOME_CELL_CYCLE
106344	Rfc4	replication factor C (activator 1) 4 [Source:MGI Symbol;Acc:MGI:2146571]							REACTOME_CELL_CYCLE
319188	H2bc22	H2B clustered histone 22 [Source:MGI Symbol;Acc:MGI:2448409]							REACTOME_CELL_CYCLE
77605	H2az2	H2A.Z histone variant 2 [Source:MGI Symbol;Acc:MGI:1924855]							REACTOME_CELL_CYCLE
319169	H2ac15	H2A clustered histone 15 [Source:MGI Symbol;Acc:MGI:2448297]
56338	Txnip	thioredoxin interacting protein [Source:MGI Symbol;Acc:MGI:1889549]									GOBP_CELL_CYCLE
18140	Uhrf1	ubiquitin-like, containing PHD and RING finger domains, 1 [Source:MGI Symbol;Acc:MGI:1338889]									GOBP_CELL_CYCLE
20866	Stim1	stromal interaction molecule 1 [Source:MGI Symbol;Acc:MGI:107476]
16582	Kifc3	kinesin family member C3 [Source:MGI Symbol;Acc:MGI:109202]
14623	Gjb6	gap junction protein, beta 6 [Source:MGI Symbol;Acc:MGI:107588]
20975	Synj2	synaptojanin 2 [Source:MGI Symbol;Acc:MGI:1201671]
15384	Hnrnpab	heterogeneous nuclear ribonucleoprotein A/B [Source:MGI Symbol;Acc:MGI:1330294]
229279	Hnrnpa3	heterogeneous nuclear ribonucleoprotein A3 [Source:MGI Symbol;Acc:MGI:1917171]
12830	Col4a5	collagen, type IV, alpha 5 [Source:MGI Symbol;Acc:MGI:88456]
20102	Rps4x	ribosomal protein S4, X-linked [Source:MGI Symbol;Acc:MGI:98158]
268977	Ltbp1	latent transforming growth factor beta binding protein 1 [Source:MGI Symbol;Acc:MGI:109151]
17929	Myom1	myomesin 1 [Source:MGI Symbol;Acc:MGI:1341430]
12815	Col11a2	collagen, type XI, alpha 2 [Source:MGI Symbol;Acc:MGI:88447]
14600	Ghr	growth hormone receptor [Source:MGI Symbol;Acc:MGI:95708]
66222	Serpinb1a	serine (or cysteine) peptidase inhibitor, clade B, member 1a [Source:MGI Symbol;Acc:MGI:1913472]
282663	Serpinb1b	serine (or cysteine) peptidase inhibitor, clade B, member 1b [Source:MGI Symbol;Acc:MGI:2445361]
58184	Cnot9	CCR4-NOT transcription complex, subunit 9 [Source:MGI Symbol;Acc:MGI:1928902]
56758	Mbnl1	muscleblind like splicing factor 1 [Source:MGI Symbol;Acc:MGI:1928482]
230163	Aldob	aldolase B, fructose-bisphosphate [Source:MGI Symbol;Acc:MGI:87995]
19281	Ptprt	protein tyrosine phosphatase, receptor type, T [Source:MGI Symbol;Acc:MGI:1321152]
20648	Snta1	syntrophin, acidic 1 [Source:MGI Symbol;Acc:MGI:101772]
14924	Magi1	membrane associated guanylate kinase, WW and PDZ domain containing 1 [Source:MGI Symbol;Acc:MGI:1203522]
11565	Adssl1	adenylosuccinate synthetase like 1 [Source:MGI Symbol;Acc:MGI:87947]
263406	Plekhg3	pleckstrin homology domain containing, family G (with RhoGef domain) member 3 [Source:MGI Symbol;Acc:MGI:2388284]
80890	Trim2	tripartite motif-containing 2 [Source:MGI Symbol;Acc:MGI:1933163]
13166	Dbh	dopamine beta hydroxylase [Source:MGI Symbol;Acc:MGI:94864]
68070	Pdzd2	PDZ domain containing 2 [Source:MGI Symbol;Acc:MGI:1922394]
77531	Anks1b	ankyrin repeat and sterile alpha motif domain containing 1B [Source:MGI Symbol;Acc:MGI:1924781]
67501	Ccdc50	coiled-coil domain containing 50 [Source:MGI Symbol;Acc:MGI:1914751]
330953	Hcn4	hyperpolarization-activated, cyclic nucleotide-gated K+ 4 [Source:MGI Symbol;Acc:MGI:1298209]
11539	Adora1	adenosine A1 receptor [Source:MGI Symbol;Acc:MGI:99401]
208898	Unc13c	unc-13 homolog C [Source:MGI Symbol;Acc:MGI:2149021]
110876	Scn2a	sodium channel, voltage-gated, type II, alpha [Source:MGI Symbol;Acc:MGI:98248]
72555	Shisa9	shisa family member 9 [Source:MGI Symbol;Acc:MGI:1919805]
19276	Ptprn2	protein tyrosine phosphatase, receptor type, N polypeptide 2 [Source:MGI Symbol;Acc:MGI:107418]
66259	Camk2n1	calcium/calmodulin-dependent protein kinase II inhibitor 1 [Source:MGI Symbol;Acc:MGI:1913509]
625018	C4a	complement component 4A (Rodgers blood group) [Source:MGI Symbol;Acc:MGI:98320]
13195	Ddc	dopa decarboxylase [Source:MGI Symbol;Acc:MGI:94876]
16440	Itpr3	inositol 1,4,5-triphosphate receptor 3 [Source:MGI Symbol;Acc:MGI:96624]
59079	Erbin	Erbb2 interacting protein [Source:MGI Symbol;Acc:MGI:1890169]
11772	Ap2a2	adaptor-related protein complex 2, alpha 2 subunit [Source:MGI Symbol;Acc:MGI:101920]
232341	Wnk1	WNK lysine deficient protein kinase 1 [Source:MGI Symbol;Acc:MGI:2442092]
69993	Chn2	chimerin 2 [Source:MGI Symbol;Acc:MGI:1917243]
16180	Il1rap	interleukin 1 receptor accessory protein [Source:MGI Symbol;Acc:MGI:104975]
12950	Hapln1	hyaluronan and proteoglycan link protein 1 [Source:MGI Symbol;Acc:MGI:1337006]
76960	Bcas1	brain enriched myelin associated protein 1 [Source:MGI Symbol;Acc:MGI:1924210]
72160	Tmem163	transmembrane protein 163 [Source:MGI Symbol;Acc:MGI:1919410]
56017	Slc2a8	solute carrier family 2, (facilitated glucose transporter), member 8 [Source:MGI Symbol;Acc:MGI:1860103]
15382	Hnrnpa1	heterogeneous nuclear ribonucleoprotein A1 [Source:MGI Symbol;Acc:MGI:104820]
170952	Prima1	proline rich membrane anchor 1 [Source:MGI Symbol;Acc:MGI:1926097]
12337	Capn5	calpain 5 [Source:MGI Symbol;Acc:MGI:1100859]
27222	Atp1a4	ATPase, Na+/K+ transporting, alpha 4 polypeptide [Source:MGI Symbol;Acc:MGI:1351335]
16497	Kcnab1	potassium voltage-gated channel, shaker-related subfamily, beta member 1 [Source:MGI Symbol;Acc:MGI:109155]
73940	Hapln2	hyaluronan and proteoglycan link protein 2 [Source:MGI Symbol;Acc:MGI:2137300]
15465	Hrh1	histamine receptor H1 [Source:MGI Symbol;Acc:MGI:107619]
12291	Cacna1g	calcium channel, voltage-dependent, T type, alpha 1G subunit [Source:MGI Symbol;Acc:MGI:1201678]
54003	Nell2	NEL-like 2 [Source:MGI Symbol;Acc:MGI:1858510]
58869	Pex5l	peroxisomal biogenesis factor 5-like [Source:MGI Symbol;Acc:MGI:1916672]
319984	Jph4	junctophilin 4 [Source:MGI Symbol;Acc:MGI:2443113]
252973	Grhl2	grainyhead like transcription factor 2 [Source:MGI Symbol;Acc:MGI:2182543]
241525	Ypel4	yippee like 4 [Source:MGI Symbol;Acc:MGI:3605071]
14164	Fgf1	fibroblast growth factor 1 [Source:MGI Symbol;Acc:MGI:95515]
11829	Aqp4	aquaporin 4 [Source:MGI Symbol;Acc:MGI:107387]
11944	Atp4a	ATPase, H+/K+ exchanging, gastric, alpha polypeptide [Source:MGI Symbol;Acc:MGI:88113]
27404	Abca8b	ATP-binding cassette, sub-family A (ABC1), member 8b [Source:MGI Symbol;Acc:MGI:1351668]
74015	Fcho1	FCH domain only 1 [Source:MGI Symbol;Acc:MGI:1921265]
108116	Slco3a1	solute carrier organic anion transporter family, member 3a1 [Source:MGI Symbol;Acc:MGI:1351867]
16517	Kcnj16	potassium inwardly-rectifying channel, subfamily J, member 16 [Source:MGI Symbol;Acc:MGI:1314842]
114304	Slc28a3	solute carrier family 28 (sodium-coupled nucleoside transporter), member 3 [Source:MGI Symbol;Acc:MGI:2137361]
69354	Slc38a4	solute carrier family 38, member 4 [Source:MGI Symbol;Acc:MGI:1916604]
64008	Aqp9	aquaporin 9 [Source:MGI Symbol;Acc:MGI:1891066]
108052	Slc14a1	solute carrier family 14 (urea transporter), member 1 [Source:MGI Symbol;Acc:MGI:1351654]
235312	C1qtnf5	C1q and tumor necrosis factor related protein 5 [Source:MGI Symbol;Acc:MGI:2385958]
72054	Cyp4f18	cytochrome P450, family 4, subfamily f, polypeptide 18 [Source:MGI Symbol;Acc:MGI:1919304]
19419	Rasgrp1	RAS guanyl releasing protein 1 [Source:MGI Symbol;Acc:MGI:1314635]
329954	Catsper4	cation channel, sperm associated 4 [Source:MGI Symbol;Acc:MGI:3043288]
101568	Vrk3	vaccinia related kinase 3 [Source:MGI Symbol;Acc:MGI:2182465]
16706	Ksr1	kinase suppressor of ras 1 [Source:MGI Symbol;Acc:MGI:105051]
52033	Pbk	PDZ binding kinase [Source:MGI Symbol;Acc:MGI:1289156]
56489	Ikbke	inhibitor of kappaB kinase epsilon [Source:MGI Symbol;Acc:MGI:1929612]
21682	Tec	tec protein tyrosine kinase [Source:MGI Symbol;Acc:MGI:98662]
11302	Aatk	apoptosis-associated tyrosine kinase [Source:MGI Symbol;Acc:MGI:1197518]
18682	Phkg1	phosphorylase kinase gamma 1 [Source:MGI Symbol;Acc:MGI:97579]
217258	Abca8a	ATP-binding cassette, sub-family A (ABC1), member 8a [Source:MGI Symbol;Acc:MGI:2386846]
224079	Atp13a4	ATPase type 13A4 [Source:MGI Symbol;Acc:MGI:1924456]
268878	Atp13a5	ATPase type 13A5 [Source:MGI Symbol;Acc:MGI:2444068]
319767	Atp10b	ATPase, class V, type 10B [Source:MGI Symbol;Acc:MGI:2442688]
70472	Atad2	ATPase family, AAA domain containing 2 [Source:MGI Symbol;Acc:MGI:1917722]
107239	Carns1	carnosine synthase 1 [Source:MGI Symbol;Acc:MGI:2147595]
71724	Aox3	aldehyde oxidase 3 [Source:MGI Symbol;Acc:MGI:1918974]
67131	Acbd4	acyl-Coenzyme A binding domain containing 4 [Source:MGI Symbol;Acc:MGI:1914381]
75475	Oplah	5-oxoprolinase (ATP-hydrolysing) [Source:MGI Symbol;Acc:MGI:1922725]
72930	Ppp2r2b	protein phosphatase 2, regulatory subunit B, beta [Source:MGI Symbol;Acc:MGI:1920180]
18784	Pla2g5	phospholipase A2, group V [Source:MGI Symbol;Acc:MGI:101899]
12654	Chil1	chitinase-like 1 [Source:MGI Symbol;Acc:MGI:1340899]
70727	Rasgef1a	RasGEF domain family, member 1A [Source:MGI Symbol;Acc:MGI:1917977]
21676	Tead1	TEA domain family member 1 [Source:MGI Symbol;Acc:MGI:101876]
52840	Dbndd2	dysbindin (dystrobrevin binding protein 1) domain containing 2 [Source:MGI Symbol;Acc:MGI:106562]
240690	St18	suppression of tumorigenicity 18 [Source:MGI Symbol;Acc:MGI:2446700]
217944	Rapgef5	Rap guanine nucleotide exchange factor (GEF) 5 [Source:MGI Symbol;Acc:MGI:2444365]
170574	Sp7	Sp7 transcription factor 7 [Source:MGI Symbol;Acc:MGI:2153568]
69660	Tmbim1	transmembrane BAX inhibitor motif containing 1 [Source:MGI Symbol;Acc:MGI:1916910]
231821	Adap1	ArfGAP with dual PH domains 1 [Source:MGI Symbol;Acc:MGI:2442201]
72902	Spock3	sparc/osteonectin, cwcv and kazal-like domains proteoglycan 3 [Source:MGI Symbol;Acc:MGI:1920152]
226861	Hhat	hedgehog acyltransferase [Source:MGI Symbol;Acc:MGI:2444681]
227738	Lrsam1	leucine rich repeat and sterile alpha motif containing 1 [Source:MGI Symbol;Acc:MGI:2684789]
18783	Pla2g4a	phospholipase A2, group IVA (cytosolic, calcium-dependent) [Source:MGI Symbol;Acc:MGI:1195256]
52662	Ldlrad4	low density lipoprotein receptor class A domain containing 4 [Source:MGI Symbol;Acc:MGI:1277150]
101401	Adamts9	a disintegrin-like and metallopeptidase (reprolysin type) with thrombospondin type 1 motif, 9 [Source:MGI Symbol;Acc:MGI:1916320]
229473	Tmem131l	transmembrane 131 like [Source:MGI Symbol;Acc:MGI:2443399]
22724	Zbtb7b	zinc finger and BTB domain containing 7B [Source:MGI Symbol;Acc:MGI:102755]
12509	Cd59a	CD59a antigen [Source:MGI Symbol;Acc:MGI:109177]
68813	Dock5	dedicator of cytokinesis 5 [Source:MGI Symbol;Acc:MGI:2652871]
84004	Mcam	melanoma cell adhesion molecule [Source:MGI Symbol;Acc:MGI:1933966]
107321	Lpxn	leupaxin [Source:MGI Symbol;Acc:MGI:2147677]
243911	Kirrel2	kirre like nephrin family adhesion molecule 2 [Source:MGI Symbol;Acc:MGI:2442334]
107581	Col16a1	collagen, type XVI, alpha 1 [Source:MGI Symbol;Acc:MGI:1095396]
22371	Vwf	Von Willebrand factor [Source:MGI Symbol;Acc:MGI:98941]
192188	Stab2	stabilin 2 [Source:MGI Symbol;Acc:MGI:2178743]
432628	Mfsd2b	major facilitator superfamily domain containing 2B [Source:MGI Symbol;Acc:MGI:3583946]
93674	Nat8f3	N-acetyltransferase 8 (GCN5-related) family member 3 [Source:MGI Symbol;Acc:MGI:2136449]
66959	Dusp26	dual specificity phosphatase 26 (putative) [Source:MGI Symbol;Acc:MGI:1914209]
19039	Lgals3bp	lectin, galactoside-binding, soluble, 3 binding protein [Source:MGI Symbol;Acc:MGI:99554]
18733	Pirb	paired Ig-like receptor B [Source:MGI Symbol;Acc:MGI:894311]
228852	Ppp1r16b	protein phosphatase 1, regulatory subunit 16B [Source:MGI Symbol;Acc:MGI:2151841]
19123	Proc	protein C [Source:MGI Symbol;Acc:MGI:97771]
100038909	Pira12	paired-Ig-like receptor A12 [Source:MGI Symbol;Acc:MGI:3709645]
100041146	Pira13	paired-Ig-like receptor A13 [Source:MGI Symbol;Acc:MGI:3705216]
18726	Lilra6	leukocyte immunoglobulin-like receptor, subfamily A (with TM domain), member 6 [Source:MGI Symbol;Acc:MGI:1195969]
18722	Pira1	paired-Ig-like receptor A1 [Source:MGI Symbol;Acc:MGI:1195971]
74111	Rbm19	RNA binding motif protein 19 [Source:MGI Symbol;Acc:MGI:1921361]
72446	Prr5l	proline rich 5 like [Source:MGI Symbol;Acc:MGI:1919696]
170756	Slc8b1	solute carrier family 8 (sodium/lithium/calcium exchanger), member B1 [Source:MGI Symbol;Acc:MGI:2180781]
18584	Pde8a	phosphodiesterase 8A [Source:MGI Symbol;Acc:MGI:1277116]
208659	Fam20a	FAM20A, golgi associated secretory pathway pseudokinase [Source:MGI Symbol;Acc:MGI:2388266]
51801	Ramp1	receptor (calcitonin) activity modifying protein 1 [Source:MGI Symbol;Acc:MGI:1858418]
74770	Hhatl	hedgehog acyltransferase-like [Source:MGI Symbol;Acc:MGI:1922020]
433809	Rnf207	ring finger protein 207 [Source:MGI Symbol;Acc:MGI:2684989]
232288	Frmd4b	FERM domain containing 4B [Source:MGI Symbol;Acc:MGI:2141794]
320435	Rinl	Ras and Rab interactor-like [Source:MGI Symbol;Acc:MGI:2444024]
68775	Atp6v1c2	ATPase, H+ transporting, lysosomal V1 subunit C2 [Source:MGI Symbol;Acc:MGI:1916025]
71643	Zgrf1	zinc finger, GRF-type containing 1 [Source:MGI Symbol;Acc:MGI:1918893]
17932	Myt1	myelin transcription factor 1 [Source:MGI Symbol;Acc:MGI:1100535]
76376	Slc24a2	solute carrier family 24 (sodium/potassium/calcium exchanger), member 2 [Source:MGI Symbol;Acc:MGI:1923626]
21886	Tle2	transducin-like enhancer of split 2 [Source:MGI Symbol;Acc:MGI:104635]
29811	Ndrg2	N-myc downstream regulated gene 2 [Source:MGI Symbol;Acc:MGI:1352498]
320587	Tmem88b	transmembrane protein 88B [Source:MGI Symbol;Acc:MGI:2444329]
21415	Tcf7l1	transcription factor 7 like 1 (T cell specific, HMG box) [Source:MGI Symbol;Acc:MGI:1202876]
83671	Sytl2	synaptotagmin-like 2 [Source:MGI Symbol;Acc:MGI:1933366]
64452	Slc5a4a	solute carrier family 5, member 4a [Source:MGI Symbol;Acc:MGI:1927848]
320091	Ano4	anoctamin 4 [Source:MGI Symbol;Acc:MGI:2443344]
268512	Slc26a11	solute carrier family 26, member 11 [Source:MGI Symbol;Acc:MGI:2444589]
228993	Slc17a9	solute carrier family 17, member 9 [Source:MGI Symbol;Acc:MGI:1919107]
100434	Slc44a1	solute carrier family 44, member 1 [Source:MGI Symbol;Acc:MGI:2140592]
18263	Odc1	ornithine decarboxylase, structural 1 [Source:MGI Symbol;Acc:MGI:97402]
15043	H2-T3	histocompatibility 2, T region locus 3 [Source:MGI Symbol;Acc:MGI:95959]
21685	Tef	thyrotroph embryonic factor [Source:MGI Symbol;Acc:MGI:98663]
14618	Gjb1	gap junction protein, beta 1 [Source:MGI Symbol;Acc:MGI:95719]
71529	Kazn	kazrin, periplakin interacting protein [Source:MGI Symbol;Acc:MGI:1918779]
101055983	Gm14569	predicted gene 14569 [Source:MGI Symbol;Acc:MGI:3705243]
110809	Srsf1	serine and arginine-rich splicing factor 1 [Source:MGI Symbol;Acc:MGI:98283]
66953	Cdca7	cell division cycle associated 7 [Source:MGI Symbol;Acc:MGI:1914203]
19732	Rgl2	ral guanine nucleotide dissociation stimulator-like 2 [Source:MGI Symbol;Acc:MGI:107483]
13423	Dnase2a	deoxyribonuclease II alpha [Source:MGI Symbol;Acc:MGI:1329019]
229595	Adamtsl4	ADAMTS-like 4 [Source:MGI Symbol;Acc:MGI:2389008]
244579	Tox3	TOX high mobility group box family member 3 [Source:MGI Symbol;Acc:MGI:3039593]
72168	Aifm3	apoptosis-inducing factor, mitochondrion-associated 3 [Source:MGI Symbol;Acc:MGI:1919418]
232146	Eva1a	eva-1 homolog A (C. elegans) [Source:MGI Symbol;Acc:MGI:2385247]
227632	Kcnt1	potassium channel, subfamily T, member 1 [Source:MGI Symbol;Acc:MGI:1924627]
74552	Nipal3	NIPA-like domain containing 3 [Source:MGI Symbol;Acc:MGI:1921802]
214112	Nipal4	NIPA-like domain containing 4 [Source:MGI Symbol;Acc:MGI:2444671]
64291	Osbpl1a	oxysterol binding protein-like 1A [Source:MGI Symbol;Acc:MGI:1927551]
68888	Gkn3	gastrokine 3 [Source:MGI Symbol;Acc:MGI:1916138]
56726	Sh3bgrl	SH3-binding domain glutamic acid-rich protein like [Source:MGI Symbol;Acc:MGI:1930849]
66084	Rmnd1	required for meiotic nuclear division 1 homolog [Source:MGI Symbol;Acc:MGI:1913334]
101471	Phrf1	PHD and ring finger domains 1 [Source:MGI Symbol;Acc:MGI:2141847]
216725	Adamts2	a disintegrin-like and metallopeptidase (reprolysin type) with thrombospondin type 1 motif, 2 [Source:MGI Symbol;Acc:MGI:1347356]
24087	Tll2	tolloid-like 2 [Source:MGI Symbol;Acc:MGI:1346044]
66433	Chchd7	coiled-coil-helix-coiled-coil-helix domain containing 7 [Source:MGI Symbol;Acc:MGI:1913683]
21425	Tfeb	transcription factor EB [Source:MGI Symbol;Acc:MGI:103270]
317653	Klk14	kallikrein related-peptidase 14 [Source:MGI Symbol;Acc:MGI:2447564]
21767	Tex264	testis expressed gene 264 [Source:MGI Symbol;Acc:MGI:1096570]
217216	Hrob	homologous recombination factor with OB-fold [Source:MGI Symbol;Acc:MGI:2387601]
109222	Rarres1	retinoic acid receptor responder (tazarotene induced) 1 [Source:MGI Symbol;Acc:MGI:1924461]
76131	Depdc1a	DEP domain containing 1a [Source:MGI Symbol;Acc:MGI:1923381]
67815	Sec14l2	SEC14-like lipid binding 2 [Source:MGI Symbol;Acc:MGI:1915065]
269643	Ppp2r2c	protein phosphatase 2, regulatory subunit B, gamma [Source:MGI Symbol;Acc:MGI:2442660]
209268	Igsf1	immunoglobulin superfamily, member 1 [Source:MGI Symbol;Acc:MGI:2147913]
78558	Htra3	HtrA serine peptidase 3 [Source:MGI Symbol;Acc:MGI:1925808]
68379	Ciz1	CDKN1A interacting zinc finger protein 1 [Source:MGI Symbol;Acc:MGI:1920234]
13101	Cyp2d10	cytochrome P450, family 2, subfamily d, polypeptide 10 [Source:MGI Symbol;Acc:MGI:88602]
13105	Cyp2d9	cytochrome P450, family 2, subfamily d, polypeptide 9 [Source:MGI Symbol;Acc:MGI:88606]
545123	Cyp2d11	cytochrome P450, family 2, subfamily d, polypeptide 11 [Source:MGI Symbol;Acc:MGI:88603]
76279	Cyp2d26	cytochrome P450, family 2, subfamily d, polypeptide 26 [Source:MGI Symbol;Acc:MGI:1923529]
223706	Cyp2d34	cytochrome P450, family 2, subfamily d, polypeptide 34 [Source:MGI Symbol;Acc:MGI:2385022]
380997	Cyp2d12	cytochrome P450, family 2, subfamily d, polypeptide 12 [Source:MGI Symbol;Acc:MGI:88604]
71754	Cyp2d40	cytochrome P450, family 2, subfamily d, polypeptide 40 [Source:MGI Symbol;Acc:MGI:1919004]
338320	Mia2	MIA SH3 domain ER export factor 2 [Source:MGI Symbol;Acc:MGI:2159614]
18553	Pcsk6	proprotein convertase subtilisin/kexin type 6 [Source:MGI Symbol;Acc:MGI:102897]
99887	Tlcd4	TLC domain containing 4 [Source:MGI Symbol;Acc:MGI:1923195]
71517	Vps35l	VPS35 endosomal protein sorting factor like [Source:MGI Symbol;Acc:MGI:1918767]
30049	Scd3	stearoyl-coenzyme A desaturase 3 [Source:MGI Symbol;Acc:MGI:1353437]
319880	Tmcc3	transmembrane and coiled coil domains 3 [Source:MGI Symbol;Acc:MGI:2442900]
14282	Fosb	FBJ osteosarcoma oncogene B [Source:MGI Symbol;Acc:MGI:95575]
631304	Cyp4f40	cytochrome P450, family 4, subfamily f, polypeptide 40 [Source:MGI Symbol;Acc:MGI:3645508]
71910	Plpp5	phospholipid phosphatase 5 [Source:MGI Symbol;Acc:MGI:1919160]
71946	Endod1	endonuclease domain containing 1 [Source:MGI Symbol;Acc:MGI:1919196]
74646	Spsb1	splA/ryanodine receptor domain and SOCS box containing 1 [Source:MGI Symbol;Acc:MGI:1921896]
83768	Dpp7	dipeptidylpeptidase 7 [Source:MGI Symbol;Acc:MGI:1933213]
279028	Adamts13	a disintegrin-like and metallopeptidase (reprolysin type) with thrombospondin type 1 motif, 13 [Source:MGI Symbol;Acc:MGI:2685556]
26939	Polr3e	polymerase (RNA) III (DNA directed) polypeptide E [Source:MGI Symbol;Acc:MGI:1349452]
71904	Paqr7	progestin and adipoQ receptor family member VII [Source:MGI Symbol;Acc:MGI:1919154]
231991	Creb5	cAMP responsive element binding protein 5 [Source:MGI Symbol;Acc:MGI:2443973]
68910	Zfp467	zinc finger protein 467 [Source:MGI Symbol;Acc:MGI:1916160]
76491	Abhd14b	abhydrolase domain containing 14b [Source:MGI Symbol;Acc:MGI:1923741]
269389	Tox2	TOX high mobility group box family member 2 [Source:MGI Symbol;Acc:MGI:3611233]
100066	Cyp2j11	cytochrome P450, family 2, subfamily j, polypeptide 11 [Source:MGI Symbol;Acc:MGI:2140224]
546837	Cyp2j7	cytochrome P450, family 2, subfamily j, polypeptide 7 [Source:MGI Symbol;Acc:MGI:2449816]
328035	Fads6	fatty acid desaturase domain family, member 6 [Source:MGI Symbol;Acc:MGI:3039592]
74100	Arpp21	cyclic AMP-regulated phosphoprotein, 21 [Source:MGI Symbol;Acc:MGI:107562]
170750	Xpnpep1	X-prolyl aminopeptidase (aminopeptidase P) 1, soluble [Source:MGI Symbol;Acc:MGI:2180003]
70574	Cpm	carboxypeptidase M [Source:MGI Symbol;Acc:MGI:1917824]
72605	Car10	carbonic anhydrase 10 [Source:MGI Symbol;Acc:MGI:1919855]
77739	Adamtsl1	ADAMTS-like 1 [Source:MGI Symbol;Acc:MGI:1924989]
434175	Ccnb1-ps	cyclin B1, pseudogene [Source:MGI Symbol;Acc:MGI:3648694]
58865	Tdh	L-threonine dehydrogenase [Source:MGI Symbol;Acc:MGI:1926231]
15374	Jpt1	Jupiter microtubule associated homolog 1 [Source:MGI Symbol;Acc:MGI:1096361]
14356	Timm10b	translocase of inner mitochondrial membrane 10B [Source:MGI Symbol;Acc:MGI:1315196]
68859	Smim1	small integral membrane protein 1 [Source:MGI Symbol;Acc:MGI:1916109]
73149	Clec4a3	C-type lectin domain family 4, member a3 [Source:MGI Symbol;Acc:MGI:1920399]
18025	Nfe2l3	nuclear factor, erythroid derived 2, like 3 [Source:MGI Symbol;Acc:MGI:1339958]
68607	Serhl	serine hydrolase-like [Source:MGI Symbol;Acc:MGI:1890404]
94226	S1pr5	sphingosine-1-phosphate receptor 5 [Source:MGI Symbol;Acc:MGI:2150641]
52670	Cpsf4l	cleavage and polyadenylation specific factor 4-like [Source:MGI Symbol;Acc:MGI:1277182]
330908	Opcml	opioid binding protein/cell adhesion molecule-like [Source:MGI Symbol;Acc:MGI:97397]
15476	Hs3st1	heparan sulfate (glucosamine) 3-O-sulfotransferase 1 [Source:MGI Symbol;Acc:MGI:1201606]
109267	Ssc4d	scavenger receptor cysteine rich family, 4 domains [Source:MGI Symbol;Acc:MGI:1924709]
100101940	Trav21-dv12	T cell receptor alpha variable 21-DV12 [Source:MGI Symbol;Acc:MGI:3652097]
80290	Gpr146	G protein-coupled receptor 146 [Source:MGI Symbol;Acc:MGI:1933113]
791403	Mhrt	myosin heavy chain associated RNA transcript [Source:MGI Symbol;Acc:MGI:3642848]
100042056	9130019P16Rik	RIKEN cDNA 9130019P16 gene [Source:MGI Symbol;Acc:MGI:1918824]
100316686	Mir1901	microRNA 1901 [Source:MGI Symbol;Acc:MGI:3811425]
100418066	Gm12202	predicted gene 12202 [Source:MGI Symbol;Acc:MGI:3650184]
100502662	Pira2-ps1	paired-Ig-like receptor A2, pseudogene 1 [Source:MGI Symbol;Acc:MGI:3801830]
100503592	A330076C08Rik	RIKEN cDNA A330076C08 gene [Source:MGI Symbol;Acc:MGI:2443693]
101055673	Pira2-ps2	paired-Ig-like receptor A2, pseudogene 2 [Source:MGI Symbol;Acc:MGI:3805554]
105244345	Gm14277	predicted gene 14277 [Source:MGI Symbol;Acc:MGI:3650350]
107988026	Mid1-ps1	midline 1, pseudogene 1 [Source:MGI Symbol;Acc:MGI:5780070]
110956	ENSMUSG00000120992	novel transcript
14017	Evi2a	ecotropic viral integration site 2a [Source:MGI Symbol;Acc:MGI:95458]
193286	BC049762	cDNA sequence BC049762 [Source:MGI Symbol;Acc:MGI:3039622]
213417	Klhdc8a	kelch domain containing 8A [Source:MGI Symbol;Acc:MGI:2442630]
216516	Ccdc157	coiled-coil domain containing 157 [Source:MGI Symbol;Acc:MGI:3041210]
230678	Tmem125	transmembrane protein 125 [Source:MGI Symbol;Acc:MGI:1923409]
244484	Wdr17	WD repeat domain 17 [Source:MGI Symbol;Acc:MGI:1924662]
271300	Cyp2d41-ps	cytochrome P450, family 2, subfamily d, member 41, pseudogene [Source:MGI Symbol;Acc:MGI:3645691]
282665	Serpinb1-ps1	serine (or cysteine) peptidase inhibitor, clade B, member 1, pseudogene [Source:MGI Symbol;Acc:MGI:2445366]
319832	Tmem229a	transmembrane protein 229A [Source:MGI Symbol;Acc:MGI:2442812]
319951	A230001M10Rik	RIKEN cDNA A230001M10 gene [Source:MGI Symbol;Acc:MGI:2443043]
320977	A330023F24Rik	RIKEN cDNA A330023F24 gene [Source:MGI Symbol;Acc:MGI:2443958]
330143	Gm26703	predicted gene, 26703 [Source:MGI Symbol;Acc:MGI:5477197]
381538	Mroh7	maestro heat-like repeat family member 7 [Source:MGI Symbol;Acc:MGI:2685873]
381544	Armh1	armadillo-like helical domain containing 1 [Source:MGI Symbol;Acc:MGI:2686507]
433374	Gm20743	predicted gene, 20743 [Source:MGI Symbol;Acc:MGI:5434099]
654820	G530011O06Rik	RIKEN cDNA G530011O06 gene [Source:MGI Symbol;Acc:MGI:3603513]
66479	1700029F12Rik	RIKEN cDNA 1700029F12 gene [Source:MGI Symbol;Acc:MGI:1913729]
665119	Sec14l5	SEC14-like lipid binding 5 [Source:MGI Symbol;Acc:MGI:3616084]
668215	Hectd2os	Hectd2, opposite strand [Source:MGI Symbol;Acc:MGI:1919243]
67182	Pdzk1ip1	PDZK1 interacting protein 1 [Source:MGI Symbol;Acc:MGI:1914432]
67330	1700047M11Rik	RIKEN cDNA 1700047M11 gene [Source:MGI Symbol;Acc:MGI:1914580]
675749	Gm10693	predicted pseudogene 10693 [Source:MGI Symbol;Acc:MGI:3704277]
677156	Cyp4f37	cytochrome P450, family 4, subfamily f, polypeptide 37 [Source:MGI Symbol;Acc:MGI:3780112]
68444	Cyp2d13	cytochrome P450, family 2, subfamily d, polypeptide 13 [Source:MGI Symbol;Acc:MGI:88605]
68841	ENSMUSG00000119959	novel transcript, antisense to Lpp
70101	Cyp4f16	cytochrome P450, family 4, subfamily f, polypeptide 16 [Source:MGI Symbol;Acc:MGI:1917351]
72014	Btbd17	BTB (POZ) domain containing 17 [Source:MGI Symbol;Acc:MGI:1919264]
73489	1700080N15Rik	RIKEN cDNA 1700080N15 gene [Source:MGI Symbol;Acc:MGI:1920739]
73569	Vgll3	vestigial like family member 3 [Source:MGI Symbol;Acc:MGI:1920819]
73652	2210408F21Rik	RIKEN cDNA 2210408F21 gene [Source:MGI Symbol;Acc:MGI:1920902]
74931	4930481A15Rik	RIKEN cDNA 4930481A15 gene [Source:MGI Symbol;Acc:MGI:1922181]
77382	C030018K13Rik	RIKEN cDNA C030018K13 gene [Source:MGI Symbol;Acc:MGI:1924632]
77864	Ypel2	yippee like 2 [Source:MGI Symbol;Acc:MGI:1925114]
78500	1700063D05Rik	RIKEN cDNA 1700063D05 gene [Source:MGI Symbol;Acc:MGI:1925750]

## Sheet: All vs aNSC
s-aNSC
differentially spliced genes (DSG)
#%array_type=MTA-1_0
#%annotation=MTA-1_0.r3.na36.mm10.a1.transcript.csv
#%comparison=All vs aNSC
ID	Fold Change	Expressed in Both Conditions	Gene Symbol	Description	Group	Exon Splicing Index	Exon P-val	Exon FDR P-val	Exon Event Name	Exon Event Score
TC0200004356.mm.1	-1.05	T	Ryr3	ryanodine receptor 3	Multiple_Complex	-90.54	0.0373	0.4792
TC0200002779.mm.1	1.41	T	Ss18l1	synovial sarcoma translocation gene on chromosome 18-like 1	Multiple_Complex	-88.83	0.0055	0.2735
TC0700004487.mm.1	1.15	T	Adam8	a disintegrin and metallopeptidase domain 8	Multiple_Complex	-74.71	0.0192	0.3971
TC1100002557.mm.1	1.14	T	Gabra1	gamma-aminobutyric acid (GABA) A receptor, subunit alpha 1	Multiple_Complex	-64.88	0.0121	0.3483
TC1700001916.mm.1	-1.04	T	Btnl7-ps	butyrophilin-like 7, pseudogene	Pseudogene	-50.28	0.0211	0.4072
TC1200002088.mm.1	1.05	T	Rps6kl1	ribosomal protein S6 kinase-like 1	Multiple_Complex	-43.28	0.003	0.2232
TC0400000716.mm.1	-1.01	T	Col27a1	collagen, type XXVII, alpha 1	Multiple_Complex	-42.57	0.0429	0.4979
TC0200003501.mm.1	-1	T	Gm13480; RP23-466O21.1	predicted gene 13480 [Source:MGI Symbol;Acc:MGI:3651871]; novel transcript	NonCoding	-41.13	0.0149	0.3689
TC0200000467.mm.1	-1.04	T	Dbh	dopamine beta hydroxylase	Multiple_Complex	-39.7	0.0142	0.3646
TC0800000342.mm.1	1.01	T			NonCoding	-35.12	0.0149	0.369
TC0200000634.mm.1	-1.01	T	Cntrl	centriolin	Multiple_Complex	-31.99	0.021	0.407
TC0600000103.mm.1	-1.03	T	Foxp2	forkhead box P2	Multiple_Complex	-31.84	0.0089	0.3194
TC1700000091.mm.1	-1.07	T	T; t	brachyury; t-complex	Coding	-31.23	0.0132	0.3569
TC0800002158.mm.1	-4.37	T	Helt	helt bHLH transcription factor	Coding	-31.17	0.0033	0.2322
TC1100001905.mm.1	1.04	T	Tmem94	transmembrane protein 94	Multiple_Complex	-30.74	0.0485	0.5151
TC0700004129.mm.1	-1.13	T	Far1os; AC102841.2	fatty acyl CoA reductase 1, opposite strand [Source:MGI Symbol;Acc:MGI:1916545]; novel transcript (1700006P19Rik); fatty acyl CoA reductase 1, opposite strand	NonCoding	-30.67	0.0323	0.4601
TC1900000184.mm.1	1.14	T	Rab3il1	RAB3A interacting protein (rabin3)-like 1	Multiple_Complex	-30.45	0.0287	0.4441
TC1300000020.mm.1	-1.01	T	Akr1c19	aldo-keto reductase family 1, member C19	Multiple_Complex	-29.09	0.0018	0.1878
TC0X00000961.mm.1	-1.02	T	Gdpd2	glycerophosphodiester phosphodiesterase domain containing 2	Multiple_Complex	-28.58	0.0022	0.2016
TC0900000725.mm.1	1.08	T	Stra6	stimulated by retinoic acid gene 6	Multiple_Complex	-27.67	0.0046	0.259
TC0100002725.mm.1	1.07	T	Sp110	Sp110 nuclear body protein	Multiple_Complex	-24.48	0.0151	0.3708
TC1200002542.mm.1	1.08	T	Ighm	immunoglobulin heavy constant mu	Multiple_Complex	-24.38	0.0278	0.4409
TC1700001941.mm.1	-1.05	T			NonCoding	-23.83	0.0085	0.3152
TC0800001037.mm.1	-1.07	T	Nod2	nucleotide-binding oligomerization domain containing 2; Synthetic construct Mus musculus clone IMAGE:100068376, MGC:195920 nucleotide-binding oligomerization domain containing 2 (Nod2) mRNA, encodes complete protein.	Multiple_Complex	-23.71	0.0093	0.3236
TC1100002087.mm.1	1.07	T	Rnf185	ring finger protein 185	Multiple_Complex	-23.5	0.0059	0.2811
TC0900002254.mm.1	5.87	T	Ncam1	neural cell adhesion molecule 1	Multiple_Complex	-23.32	0.0004	0.0968
TC0300000769.mm.1	1.16	T	Adar	adenosine deaminase, RNA-specific	Multiple_Complex	-23.29	0.0107	0.336
TC1500001021.mm.1	1.34	T	Asic1	acid-sensing (proton-gated) ion channel 1	Multiple_Complex	-22.8	0.0022	0.2016
TC0X00003043.mm.1	-1.04	T	Slc25a53	solute carrier family 25, member 53	Multiple_Complex	-22.73	0.0316	0.4572
TC0600003202.mm.1	1.02	T	Gm15862; RP23-114E15.9	predicted gene 15862 [Source:MGI Symbol;Acc:MGI:3801842]; novel transcript	NonCoding	-22.57	0.0074	0.3004
TC0700001118.mm.1	-1.05	T	Acan	aggrecan	Coding	-22.46	0.0065	0.2888
TC0600001393.mm.1	1.23	T	Foxj2; Mir7231	forkhead box J2; microRNA 7231	Multiple_Complex	-22.29	0.0016	0.1792
TC1200000714.mm.1	-1.12	T	Plekhh1	pleckstrin homology domain containing, family H (with MyTH4 domain) member 1	Multiple_Complex	-22.26	0.0001	0.0624
TC0200000550.mm.1	-1.04	T	Hmcn2	hemicentin 2	Multiple_Complex	-22.23	0.0103	0.3337
TC0600001271.mm.1	-1.04	T	Atg7	autophagy related 7	Multiple_Complex	-22.2	0.0046	0.2595
TC1100000314.mm.1	-1.1	T	Psme4	proteasome (prosome, macropain) activator subunit 4; Synthetic construct Mus musculus clone IMAGE:100064032, MGC:193403 proteasome (prosome, macropain) activator subunit 4 (Psme4) mRNA, encodes complete protein.	Multiple_Complex	-22.15	0.0018	0.1866
TC0400002689.mm.1	-1.02	T	Gm12510; RP23-120N11.5	predicted gene 12510 [Source:MGI Symbol;Acc:MGI:3651360]; novel transcript	NonCoding	-22.04	0.0073	0.3
TC0200004813.mm.1	1.54	T	Napb	N-ethylmaleimide sensitive fusion protein attachment protein beta	Multiple_Complex	-21.91	0.0033	0.2322
TC1700002528.mm.1	1.07	T			NonCoding	-21.77	0.0223	0.4141
TC0100002175.mm.1	1.04	T	Uggt1	UDP-glucose glycoprotein glucosyltransferase 1	Multiple_Complex	-21.36	0.024	0.4227
TC0100002028.mm.1	-1.04	T	Pkhd1	polycystic kidney and hepatic disease 1	Multiple_Complex	-20.87	0.0467	0.5098
TC1200002154.mm.1	-1.29	T	Ston2	stonin 2	Multiple_Complex	-20.77	0.0178	0.3886
TC0800002008.mm.1	-1.01	T	Ubxn8	UBX domain protein 8	Coding	-20.76	0.0105	0.3349
TC1400002219.mm.1	-1	T	Blk	B lymphoid kinase	Coding	-20.71	0.0124	0.3519
TC1300001621.mm.1	-1.19	T	Zfp322a	zinc finger protein 322A	Multiple_Complex	-20.33	0.0053	0.2708
TC0800002570.mm.1	1.07	T	Cc2d1a	coiled-coil and C2 domain containing 1A	Multiple_Complex	-20.21	0.0174	0.3863
TC0400002629.mm.1	3.42	T	LOC100861629	PREDICTED: uncharacterized LOC100861629 (LOC100861629), miscRNA.	NonCoding	-20.2	0.0076	0.3041
TC0800000779.mm.1	1.02	T	Gm3643	PREDICTED: predicted gene 3643 (Gm3643), miscRNA.	NonCoding	-20.14	0.0183	0.3921
TC1000000661.mm.1	1.24	T	Ank3	ankyrin 3, epithelial	Multiple_Complex	-19.96	0.0011	0.1583
TC1500001676.mm.1	-1.06	T	Col22a1	collagen, type XXII, alpha 1	Multiple_Complex	-19.92	0.0112	0.341
TC0200002160.mm.1	1.3	T	Gm14093; 2.145048962-146444327.1	predicted gene 14093 [Source:MGI Symbol;Acc:MGI:3651964]; novel transcript	NonCoding	-19.5	0.0087	0.317	Cassette Exon	0.21
TC0700001971.mm.1	1.05	T	C030029H02Rik	RIKEN cDNA C030029H02 gene; PREDICTED: RIKEN cDNA C030029H02 gene (C030029H02Rik), miscRNA.	NonCoding	-19.15	0.0003	0.0895
TC0600001372.mm.1	-1.28	T	A2m	alpha-2-macroglobulin	Multiple_Complex	-19.02	0.03	0.4504
TC0200004776.mm.1	-1.1	T	Ralgapa2	Ral GTPase activating protein, alpha subunit 2 (catalytic)	Multiple_Complex	-18.97	0.0356	0.473
TC1200001875.mm.1	1	T	Cdkl1	cyclin-dependent kinase-like 1 (CDC2-related kinase)	Coding	-18.88	0.0045	0.2579
TC0200001634.mm.1	-1.03	T	Slc5a12	solute carrier family 5 (sodium/glucose cotransporter), member 12; Synthetic construct Mus musculus clone IMAGE:100064094, MGC:193465 solute carrier family 5 (sodium/glucose cotransporter), member 12 (Slc5a12) mRNA, encodes complete protein.	Multiple_Complex	-18.43	0.0149	0.3693
TC0X00003059.mm.1	-1.03	T	Platr21	pluripotency associated transcript 21	NonCoding	-18.22	0.0217	0.4108
TC1800000297.mm.1	1.21	T	Kdm3b	KDM3B lysine (K)-specific demethylase 3B	Multiple_Complex	-18.21	0.0037	0.2407
TC0600003060.mm.1	1.33	T	Iqsec3	IQ motif and Sec7 domain 3; Synthetic construct Mus musculus clone IMAGE:100068357, MGC:195901 IQ motif and Sec7 domain 3 (Iqsec3) mRNA, encodes complete protein.; IQ motif and Sec7 domain 3 (Iqsec3), mRNA.	Multiple_Complex	-18.18	0.0206	0.4045
TC1400002343.mm.1	-1.23	T	Bmp1	bone morphogenetic protein 1	Multiple_Complex	-18.16	0.0292	0.4466
TC0400000712.mm.1	1.5	T	Zfp618	zinc finger protein 618	Multiple_Complex	-18.15	0.0203	0.4029
TC0200001662.mm.1	1.01	T	Lpcat4	lysophosphatidylcholine acyltransferase 4	Multiple_Complex	-18.02	0.0086	0.3153
TC0800001360.mm.1	1.09	T	Vat1l	vesicle amine transport protein 1 homolog-like (T. californica)	Multiple_Complex	-17.97	0.0364	0.4758
TC0X00000690.mm.1	1.2	T	Slc6a8	solute carrier family 6 (neurotransmitter transporter, creatine), member 8; solute carrier family 6 (neurotransmitter transporter, creatine), member 8 (Slc6a8), transcript variant 2, mRNA.	Multiple_Complex	-17.71	0.0322	0.46
TC1700000522.mm.1	-1.05	T	Dnah8	dynein, axonemal, heavy chain 8	Multiple_Complex	-17.62	0.0341	0.4669
TC1600001603.mm.1	-1.24	T	Maats1	MYCBP-associated, testis expressed 1	Multiple_Complex	-17.54	0.0004	0.1012
TC1600000365.mm.1	1.09	T	A230028O05Rik	RIKEN cDNA A230028O05 gene	NonCoding	-17.49	0.0138	0.3617
TC1100000937.mm.1	1.23	T	Dlg4	discs, large homolog 4 (Drosophila)	Multiple_Complex	-17.33	0.0076	0.303
TC0900003244.mm.1	1.04	T	Scn5a	sodium channel, voltage-gated, type V, alpha; Synthetic construct Mus musculus clone IMAGE:100069451, MGC:199353 sodium channel, voltage-gated, type V, alpha (Scn5a) mRNA, encodes complete protein.	Coding	-17	0.0435	0.5
TC1700000359.mm.1	-1.24	T	Ift140	intraflagellar transport 140	Multiple_Complex	-16.93	0.0082	0.3118
TC0700001269.mm.1	-2.29	T	Me3	malic enzyme 3, NADP(+)-dependent, mitochondrial	Multiple_Complex	-16.73	0.0033	0.232	Cassette Exon	0.21
TC1700000602.mm.1	1.17	T	Rgl2	ral guanine nucleotide dissociation stimulator-like 2	Multiple_Complex	-16.65	0.0045	0.2574
TC0100002758.mm.1	-5.2	T	Ecel1	endothelin converting enzyme-like 1	Multiple_Complex	-16.49	2.61e-05	0.0293	Cassette Exon	0.22
TC0200004975.mm.1	-1.22	T	Uqcc1	ubiquinol-cytochrome c reductase complex assembly factor 1	Multiple_Complex	-16.31	0.0129	0.3548
TC0500003202.mm.1	1.11	T	Cux2	cut-like homeobox 2	Multiple_Complex	-16.3	0.0095	0.3262
TC1500000206.mm.1	-1.18	T			NonCoding	-16.23	0.004	0.2478
TC0X00001313.mm.1	1.33	T			NonCoding	-16.18	0.0496	0.5178
TC1800001742.mm.1	1.08	T	9630014M24Rik; Arhgap26	RIKEN cDNA 9630014M24 gene; Rho GTPase activating protein 26	Multiple_Complex	-16.13	0.0199	0.4012
TC1900000356.mm.1	-5	T	Trpm3	transient receptor potential cation channel, subfamily M, member 3	Multiple_Complex	-16.01	0.0037	0.2409
TC1800000625.mm.1	-1.01	T	Csf1r	colony stimulating factor 1 receptor	Coding	-16	0.0419	0.4948
TC1700002556.mm.1	1.29	T	Heatr5b	HEAT repeat containing 5B	Multiple_Complex	-16	0.0284	0.4434
TC0200003533.mm.1	1.97	T	Cacnb4	calcium channel, voltage-dependent, beta 4 subunit	Multiple_Complex	-15.97	0.0105	0.3347
TC0500001778.mm.1	-1.12	T			NonCoding	-15.9	0.0117	0.3448
TC0100003350.mm.1	-1.01	T	Tnn	tenascin N	Coding	-15.8	0.0456	0.5059
TC1900000775.mm.1	-1.1	T			NonCoding	-15.79	0.0061	0.2842
TC1100000780.mm.1	-1.54	T	Mfap4	microfibrillar-associated protein 4	Multiple_Complex	-15.74	0.0206	0.4048
TC1200000029.mm.1	-1.15	T	Itsn2	intersectin 2	Multiple_Complex	-15.69	0.0051	0.2679
TC1700001197.mm.1	1.21	T	Rmdn2	regulator of microtubule dynamics 2	Coding	-15.63	0.0049	0.2655
TC0100000023.mm.1	9.57	T	St18	suppression of tumorigenicity 18	Multiple_Complex	-15.59	0.0004	0.0942
TC0200003885.mm.1	-1.07	T	P2rx3	purinergic receptor P2X, ligand-gated ion channel, 3	Multiple_Complex	-15.57	0.0219	0.412
TC0100001176.mm.1	-2.35	T	Slc41a1	solute carrier family 41, member 1	Multiple_Complex	-15.48	0.0132	0.3569	Alternative 3' Acceptor Site	0.2
TC0400001239.mm.1	-1.1	T	Mknk1	MAP kinase-interacting serine/threonine kinase 1; MAP kinase-interacting serine/threonine kinase 1 (Mknk1), mRNA.	Multiple_Complex	-15.4	0.0067	0.2929
TC0600002538.mm.1	1	T	Reg3d	regenerating islet-derived 3 delta	Coding	-15.37	0.0081	0.3105
TC0400000737.mm.1	-1.05	T			NonCoding	-15.3	0.0166	0.3815
TC0400001975.mm.1	1.32	T	Rere	arginine glutamic acid dipeptide (RE) repeats; Synthetic construct Mus musculus clone IMAGE:100068117, MGC:195734 arginine glutamic acid dipeptide (RE) repeats (Rere) mRNA, encodes complete protein.	Multiple_Complex	-15.25	0.0019	0.1895
TC1700002520.mm.1	1.09	T	Galnt14	UDP-N-acetyl-alpha-D-galactosamine:polypeptide N-acetylgalactosaminyltransferase 14	Multiple_Complex	-15.1	0.0062	0.2846
TC0700002779.mm.1	-1.02	T	Cd22	CD22 antigen	Multiple_Complex	-15	0.0086	0.3159
TC0300002469.mm.1	-1.04	T	Gabpb2	GA repeat binding protein, beta 2	Multiple_Complex	-14.94	0.0388	0.4846	Alternative 3' Acceptor Site	0.21
TC0X00002590.mm.1	-1.27	T			NonCoding	-14.76	0.0244	0.4246
TC0400004016.mm.1	-1.1	T	Fbxo44	F-box protein 44	Multiple_Complex	-14.66	0.0248	0.4263
TC0400000435.mm.1	1.38	T	Rusc2	RUN and SH3 domain containing 2	Multiple_Complex	-14.63	0.0022	0.2029
TC0700001169.mm.1	-1.12	T	Pde8a	phosphodiesterase 8A	Multiple_Complex	-14.61	0.003	0.2244
TC1800000829.mm.1	-1.1	T	Loxhd1	lipoxygenase homology domains 1	Coding	-14.57	0.0284	0.443
TC0600001830.mm.1	9.76	T	Dlx6os1	distal-less homeobox 6, opposite strand 1; Dlx6 opposite strand transcript 1	NonCoding	-14.55	0.0459	0.5071
TC1100003034.mm.1	-1.06	T	Gucy2e	guanylate cyclase 2e	Multiple_Complex	-14.54	0.0058	0.2781
TC1600001528.mm.1	1.61	T	Kalrn	kalirin, RhoGEF kinase	Multiple_Complex	-14.47	0.0021	0.1983
TC1300000285.mm.1	1.09	T	Dcdc2a	doublecortin domain containing 2a	Multiple_Complex	-14.44	0.0454	0.5055
TC1700001834.mm.1	-1.14	T	Notch3	notch 3; Synthetic construct Mus musculus clone IMAGE:100069546, MGC:199448 Notch gene homolog 3 (Drosophila) (Notch3) mRNA, encodes complete protein.	Coding	-14.39	0.0018	0.187
TC0300000892.mm.1	1.27	T	Sema6c	sema domain, transmembrane domain (TM), and cytoplasmic domain, (semaphorin) 6C; Synthetic construct Mus musculus clone IMAGE:100063292, MGC:191056 sema domain, transmembrane domain (TM), and cytoplasmic domain, (semaphorin) 6C (Sema6c) mRNA, encodes complete protein.; sema domain, transmembrane domain (TM), and cytoplasmic domain, (semaphorin) 6C (Sema6c), mRNA.	Multiple_Complex	-14.28	0.0037	0.242	Alternative 3' Acceptor Site	0.29
TC0200002476.mm.1	-1.07	T	Sgk2	serum/glucocorticoid regulated kinase 2	Multiple_Complex	-14.26	0.0031	0.2274
TC0500000597.mm.1	-1.24	T	C030018K13Rik	RIKEN cDNA C030018K13 gene; RIKEN cDNA C030018K13 gene (C030018K13Rik), transcript variant 1, non-coding RNA.; RIKEN cDNA C030018K13 gene (C030018K13Rik), transcript variant 2, non-coding RNA.; RIKEN cDNA C030018K13 gene (C030018K13Rik), transcript variant 3, non-coding RNA.	NonCoding	-14.19	0.0212	0.4075
TC1700002526.mm.1	-1.02	T	Xdh	xanthine dehydrogenase; xanthine dehydrogenase (Xdh), mRNA.	Multiple_Complex	-13.99	0.0112	0.3404
TC0300000864.mm.1	-1.49	T	Rorc	RAR-related orphan receptor gamma	Multiple_Complex	-13.98	0.0002	0.0751
TC0500000785.mm.1	-1.08	T	Stap1	signal transducing adaptor family member 1	Multiple_Complex	-13.95	0.0243	0.424
TC1900001030.mm.1	1.04	T	Fermt3	fermitin family homolog 3 (Drosophila)	Coding	-13.87	0.0341	0.4672
TC0100002757.mm.1	1	T	Alpi	alkaline phosphatase, intestinal; Synthetic construct Mus musculus clone IMAGE:100066332, MGC:195469 alkaline phosphatase, intestinal (Alpi) mRNA, encodes complete protein.	Coding	-13.8	0.002	0.1959
TC0700002996.mm.1	-1.03	T	Ccdc155	coiled-coil domain containing 155	Multiple_Complex	-13.76	0.0062	0.2846
TC1100001273.mm.1	1.14	T	Synrg	synergin, gamma; synergin, gamma (Synrg), transcript variant 2, mRNA.	Multiple_Complex	-13.74	0.0126	0.3531
TC1100004159.mm.1	-1.04	T	Lgals3bp	lectin, galactoside-binding, soluble, 3 binding protein	Multiple_Complex	-13.73	0.0022	0.1998
TC1700000644.mm.1	-1.02	T	Tnxb	tenascin XB	Coding	-13.72	0.0144	0.3659
TC1700002206.mm.1	-1.17	T			NonCoding	-13.68	0.0242	0.4237
TC1100003110.mm.1	1.22	T	Camta2	calmodulin binding transcription activator 2	Multiple_Complex	-13.68	0.0021	0.197
TC1100000500.mm.1	-1.16	T	Mgat1	mannoside acetylglucosaminyltransferase 1	Multiple_Complex	-13.65	0.0126	0.3533
TC0400001539.mm.1	1.01	T	Col16a1	collagen, type XVI, alpha 1	Multiple_Complex	-13.54	0.0136	0.3605
TC0200005296.mm.1	1.15	T	Ppp4r1l-ps	protein phosphatase 4, regulatory subunit 1-like, pseudogene	Multiple_Complex	-13.54	0.0339	0.4663
TC0900002985.mm.1	1.05	T	Acpp	acid phosphatase, prostate	Multiple_Complex	-13.22	0.0107	0.3364
TC0400001376.mm.1	1.03	T	Gm12897	predicted gene 12897 [Source:MGI Symbol;Acc:MGI:3649906]	Multiple_Complex	-13.21	0.0278	0.4406
TC0800000090.mm.1	1.36	T	Carkd	carbohydrate kinase domain containing	Multiple_Complex	-13.08	0.0424	0.4963
TC1100000964.mm.1	-1.01	T	Eno3	enolase 3, beta muscle; enolase 3, beta muscle (Eno3), transcript variant 2, mRNA.	Multiple_Complex	-13.06	0.0203	0.403	Alternative 3' Acceptor Site	0.21
TC1000002099.mm.1	-1.15	T	Prdm1	PR domain containing 1, with ZNF domain; Synthetic construct Mus musculus clone IMAGE:100069466, MGC:199368 Prdm1 protein (Prdm1) mRNA, encodes complete protein.	Multiple_Complex	-12.99	0.0003	0.0931
TC1200002415.mm.1	-1.07	T	Xrcc3	X-ray repair complementing defective repair in Chinese hamster cells 3	Multiple_Complex	-12.98	0.0085	0.3152
TC0200004493.mm.1	1.99	T	Frmd5	FERM domain containing 5	Multiple_Complex	-12.95	0.0001	0.0607
TC0200004762.mm.1	1.07	T	Dzank1	double zinc ribbon and ankyrin repeat domains 1	Multiple_Complex	-12.93	0.0014	0.1715
TC1300002357.mm.1	-3.93	T	Adgrv1	adhesion G protein-coupled receptor V1	Multiple_Complex	-12.84	0.0029	0.2223
TC0700004569.mm.1	-1.4	T	H19; Mir675	H19, imprinted maternally expressed transcript (H19), long non-coding RNA.; microRNA 675; H19 fetal liver mRNA; H19, imprinted maternally expressed transcript	Multiple_Complex	-12.72	0.0009	0.1404
TC0700004638.mm.1	1.16	T	Rab4b; Mir3101	RAB4B, member RAS oncogene family; microRNA 3101	Multiple_Complex	-12.72	0.0006	0.1238
TC0700002956.mm.1	-1.03	T	Acpt	acid phosphatase, testicular	Coding	-12.71	0.0384	0.4831
TC0100003310.mm.1	1.36	T	Cep350	centrosomal protein 350	Multiple_Complex	-12.67	0.0383	0.4827
TC1100004224.mm.1	-3.51	T	Notum	notum pectinacetylesterase homolog (Drosophila)	Multiple_Complex	-12.63	0.0002	0.0718	Cassette Exon	0.25
TC0500003226.mm.1	1.29	T	AI480526; AC158114.3	expressed sequence AI480526 [Source:MGI Symbol;Acc:MGI:2140910]; novel transcript	NonCoding	-12.54	0.0034	0.235
TC1700000526.mm.1	-1.06	T	Umodl1	uromodulin-like 1; Synthetic construct Mus musculus clone IMAGE:100069490, MGC:199392 uromodulin-like 1 (Umodl1) mRNA, encodes complete protein.	Coding	-12.49	0.0134	0.3587
TC1000003023.mm.1	1.05	T	Hmga2	high mobility group AT-hook 2	Multiple_Complex	-12.3	0.0051	0.2678
TC0600003433.mm.1	-1.32	T	Itpr2	inositol 1,4,5-triphosphate receptor 2; inositol 1,4,5-triphosphate receptor 2 (Itpr2), transcript variant 2, mRNA.	Multiple_Complex	-12.27	0.0017	0.1815
TC0X00003278.mm.1	1.56	T	Cdkl5	cyclin-dependent kinase-like 5	Multiple_Complex	-12.19	0.0007	0.1269
TC0200002157.mm.1	2.01	T	Slc24a3	solute carrier family 24 (sodium/potassium/calcium exchanger), member 3	Multiple_Complex	-12.17	0.0005	0.1119
TC0200001466.mm.1	1.02	T	Gm13794; RP23-338J3.1	predicted gene 13794 [Source:MGI Symbol;Acc:MGI:3652242]; putative novel transcript	NonCoding	-12.03	0.0061	0.2835
TC1400002141.mm.1	-1.32	T	Gjb6	gap junction protein, beta 6; gap junction protein, beta 6 (Gjb6), transcript variant 1, mRNA.	Multiple_Complex	-11.92	0.0115	0.343
TC1700001756.mm.1	-1.1	T	Tulp1	tubby like protein 1	Multiple_Complex	-11.92	0.0063	0.2866
TC0600003277.mm.1	-1.01	T	Gm8882; Gm4736; Prb1	predicted gene 8882; predicted gene 4736; proline-rich protein BstNI subfamily 1	Coding	-11.84	0.0182	0.3915
TC0500000421.mm.1	1.01	T	Gm1043	predicted gene 1043	Multiple_Complex	-11.81	0.0122	0.3488
TC0500002831.mm.1	-1.12	T			NonCoding	-11.7	0.0108	0.3368
TC0100003853.mm.1	-1.36	T	Cd46	CD46 antigen, complement regulatory protein	Multiple_Complex	-11.62	0.0152	0.3713
TC1100000755.mm.1	1.01	T	Myo15	myosin XV	Multiple_Complex	-11.62	0.0033	0.2322
TC1900000201.mm.1	1.34	T	Cpsf7	cleavage and polyadenylation specific factor 7	Multiple_Complex	-11.61	0.0049	0.2648
TC1300000892.mm.1	-1.03	T	Zdhhc11	zinc finger, DHHC domain containing 11	Coding	-11.61	0.0086	0.3158
TC0200005294.mm.1	-1	T			NonCoding	-11.51	0.0066	0.2908
TC0800001514.mm.1	1.07	T	Cdk10	cyclin-dependent kinase 10	Coding	-11.51	0.0215	0.4095	Alternative 3' Acceptor Site	0.21
TC0500001361.mm.1	-1.03	T	Tmem116	transmembrane protein 116	Multiple_Complex	-11.48	0.0342	0.4677
TC0200004154.mm.1	-3.43	T	Tspan18	tetraspanin 18	Multiple_Complex	-11.47	0.0032	0.2286	Cassette Exon	0.25
TC0600002019.mm.1	-1.01	T	Mkln1os	muskelin 1, intracellular mediator containing kelch motifs, opposite strand; Mkln1 opposite strand transcript	NonCoding	-11.45	0.0081	0.3103
TC1300001189.mm.1	-1.08	T			NonCoding	-11.44	0.0044	0.2553
TC0200000478.mm.1	-1.07	T	Col5a1	collagen, type V, alpha 1	Multiple_Complex	-11.43	0.0013	0.168
TC0300000747.mm.1	1.03	T	Pklr	pyruvate kinase liver and red blood cell; Synthetic construct Mus musculus clone IMAGE:100064097, MGC:193468 pyruvate kinase liver and red blood cell (Pklr) mRNA, encodes complete protein.	Multiple_Complex	-11.43	0.0106	0.3355
TC1300001759.mm.1	-1.07	T	Mylk4	myosin light chain kinase family, member 4	Multiple_Complex	-11.36	0.0093	0.3236
TC1000002698.mm.1	-1.03	T	Gm15915	predicted gene 15915	NonCoding	-11.3	0.007	0.2954
TC0300001315.mm.1	1.25	T	Casp6	caspase 6	Multiple_Complex	-11.28	0.0036	0.24
TC0700000506.mm.1	-1.05	T			NonCoding	-11.26	0.0261	0.4329
TC0500000385.mm.1	1.15	T	Htt	huntingtin	Multiple_Complex	-11.23	0.0062	0.2851
TC0200000993.mm.1	-1.12	T			NonCoding	-11.19	0.0117	0.3448
TC0900002123.mm.1	1.07	T	Arhgef12	Rho guanine nucleotide exchange factor (GEF) 12	Multiple_Complex	-11.06	0.031	0.455
TC1900000756.mm.1	1.08	T	Dusp5	dual specificity phosphatase 5	Coding	-11.05	0.0114	0.3429
TC0300001958.mm.1	1.5	T	Setd7	SET domain containing (lysine methyltransferase) 7	Multiple_Complex	-11.05	0.0005	0.1136
TC1900001012.mm.1	-1.02	T	Slc22a12	solute carrier family 22 (organic anion/cation transporter), member 12	Multiple_Complex	-11.01	0.0068	0.2935
TC0200002968.mm.1	1.35	T	Fbxo18	F-box protein 18	Multiple_Complex	-10.96	0.0106	0.3354
TC1900000987.mm.1	1.02	T	Frmd8	FERM domain containing 8	Multiple_Complex	-10.93	0.0181	0.391
TC0700003943.mm.1	1.13	T	Trim30a	tripartite motif-containing 30A	Multiple_Complex	-10.92	0.0119	0.3467
TC1700000584.mm.1	1.97	T	Adamts10	a disintegrin-like and metallopeptidase (reprolysin type) with thrombospondin type 1 motif, 10; Synthetic construct Mus musculus clone IMAGE:100062720, MGC:190940 a disintegrin-like and metallopeptidase (reprolysin type) with thrombospondin type 1 motif, 10 (Adamts10) mRNA, encodes complete protein.	Multiple_Complex	-10.86	0.0146	0.3672
TC0700002989.mm.1	-1.06	T	Fcgrt	Fc receptor, IgG, alpha chain transporter	Multiple_Complex	-10.86	0.0022	0.1998
TC1500002259.mm.1	-1.03	T	Krt83; Krt81; 5430421N21Rik; Krt85	keratin 83; keratin 81; RIKEN cDNA 5430421N21 gene; keratin 85	Multiple_Complex	-10.85	0.0138	0.3619
TC0200000525.mm.1	1.08	T	Tbc1d13	TBC1 domain family, member 13	Multiple_Complex	-10.82	0.0211	0.4073
TC1400001501.mm.1	1.13	T	Ube2e1	ubiquitin-conjugating enzyme E2E 1	Multiple_Complex	-10.82	0.0044	0.2547
TC1100002084.mm.1	1.19	T	Limk2	LIM motif-containing protein kinase 2	Multiple_Complex	-10.81	0.0237	0.4212
TC0200000222.mm.1	1.08	T	Il15ra	interleukin 15 receptor, alpha chain; interleukin 15 receptor, alpha chain (Il15ra), transcript variant 2, mRNA.; interleukin 15 receptor, alpha chain (Il15ra), transcript variant 1, mRNA.	Multiple_Complex	-10.78	0.0002	0.0663
TC0X00001682.mm.1	-1.39	T	Gpm6b	glycoprotein m6b	Multiple_Complex	-10.75	0.046	0.5073
TC0200002596.mm.1	1.01	T	9230111E07Rik; Gm14321; RP24-151H6.4; RP24-151H6.3	RIKEN cDNA 9230111E07 gene [Source:MGI Symbol;Acc:MGI:1924998]; predicted gene 14321 [Source:MGI Symbol;Acc:MGI:3701951]; novel transcript (9230111E07Rik); novel transcript	NonCoding	-10.75	0.0136	0.3605
TC1100002225.mm.1	1.17	T	Ddc	dopa decarboxylase	Multiple_Complex	-10.74	0.0058	0.2787
TC1100000566.mm.1	1.04	T	Col23a1	collagen, type XXIII, alpha 1	Multiple_Complex	-10.73	0.0214	0.4088
TC0400000382.mm.1	1.02	T	Galt	galactose-1-phosphate uridyl transferase	Multiple_Complex	-10.71	0.0082	0.3113
TC0700003990.mm.1	-1.23	T	Tpp1	tripeptidyl peptidase I	Coding	-10.71	0.0177	0.3883
TC0500002135.mm.1	1.2	T	Cnpy1	canopy 1 homolog (zebrafish) (Cnpy1), mRNA.; canopy 1 homolog (zebrafish)	Coding	-10.46	0.0105	0.3349
TC0700001986.mm.1	1.02	T	Jakmip3	janus kinase and microtubule interacting protein 3; janus kinase and microtubule interacting protein 3 (Jakmip3), mRNA.	Multiple_Complex	-10.45	0.0002	0.078
TC1100004152.mm.1	1.19	T	Cyth1	cytohesin 1	Multiple_Complex	-10.44	0.0015	0.1757
TC0X00003327.mm.1	-1.22	T	Car5b	carbonic anhydrase 5b, mitochondrial	Multiple_Complex	-10.44	0.013	0.356
TC1200000751.mm.1	2.45	T	Smoc1	SPARC related modular calcium binding 1; SPARC related modular calcium binding 1	Multiple_Complex	-10.44	0.0087	0.3166
TC0700002090.mm.1	-1.03	T	Kcnq1	potassium voltage-gated channel, subfamily Q, member 1	Multiple_Complex	-10.39	0.0072	0.2975
TC0800000108.mm.1	1.09	T	Spaca7	sperm acrosome associated 7	Coding	-10.38	0.0062	0.2849
TC0600001373.mm.1	-1.02	T	Mug1	murinoglobulin 1	Multiple_Complex	-10.37	0.0111	0.3398
TC0300000238.mm.1	1.91	T	Sox2ot; Mir1897	SOX2 overlapping transcript (non-protein coding); microRNA 1897	Multiple_Complex	-10.3	0.0071	0.2964
TC0500001628.mm.1	1.75	T	Actl6b	actin-like 6B	Multiple_Complex	-10.26	0.004	0.2468
TC0X00001067.mm.1	1.46	T	Atp7a	ATPase, Cu++ transporting, alpha polypeptide	Multiple_Complex	-10.16	0.0028	0.2194
TC0700003039.mm.1	1.03	T	Saa3	serum amyloid A 3	Multiple_Complex	-10.11	0.0022	0.2014
TC1900000409.mm.1	-1.09	T	Smarca2	SWI/SNF related, matrix associated, actin dependent regulator of chromatin, subfamily a, member 2	Multiple_Complex	-10.09	0.0286	0.4439
TC1500001584.mm.1	-1.39	T	Tatdn1	TatD DNase domain containing 1	Multiple_Complex	-10.04	0.0266	0.4352
TC0100000806.mm.1	-1.01	T	Akp3	alkaline phosphatase 3, intestine, not Mn requiring	Coding	-10.01	0.005	0.2671
TC0900000486.mm.1	1.04	T	Trim29	tripartite motif-containing 29	Multiple_Complex	-10	0.0468	0.5103
TC1200001065.mm.1	-1.07	T	AU015791	expressed sequence AU015791	NonCoding	-9.97	0.0053	0.2702
TC0200001869.mm.1	1.17	T			NonCoding	-9.97	0.0006	0.1166
TC1100003556.mm.1	-1.34	T	Wfikkn2	WAP, follistatin/kazal, immunoglobulin, kunitz and netrin domain containing 2	Multiple_Complex	-9.96	0.0153	0.3723
TC0100000430.mm.1	1.36	T	Aox4	aldehyde oxidase 4	Multiple_Complex	-9.93	0.0052	0.2695
TC1400000084.mm.1	-1.06	T	4930455B14Rik	RIKEN cDNA 4930455B14 gene	NonCoding	-9.89	0.0243	0.4243
TC0200005481.mm.1	1.05	T	Serf2	small EDRK-rich factor 2	Multiple_Complex	-9.88	0.0072	0.2971
TC0100000937.mm.1	-1.1	T	Farp2	FERM, RhoGEF and pleckstrin domain protein 2	Coding	-9.87	0.0392	0.486
TC1100000857.mm.1	-1.03	T	Myh13	myosin, heavy polypeptide 13, skeletal muscle	Coding	-9.87	0.0121	0.3479
TC1100001651.mm.1	1.01	T	Aoc3	amine oxidase, copper containing 3	Coding	-9.84	0.0483	0.5146
TC0X00002236.mm.1	-1.39	T	Fam122b	family with sequence similarity 122, member B	Multiple_Complex	-9.82	0.0138	0.3621
TC1800000834.mm.1	1.02	T	Pstpip2	proline-serine-threonine phosphatase-interacting protein 2	Coding	-9.81	0.0162	0.3788
TC1100003847.mm.1	-1.36	T	Gm11627	predicted gene 11627	Multiple_Complex	-9.76	0.002	0.1949
TC1700000535.mm.1	1.79	T	Pde9a	phosphodiesterase 9A	Multiple_Complex	-9.76	0.0023	0.204
TC0700004555.mm.1	1.04	T	Gm9340	PREDICTED: predicted gene 9340 (Gm9340), mRNA.	Coding	-9.76	0.0203	0.4031
TC0700004530.mm.1	-1.01	T	Irf7	interferon regulatory factor 7	Multiple_Complex	-9.76	0.0189	0.396
TC1900001003.mm.1	1.02	T	Snx15	sorting nexin 15	Multiple_Complex	-9.75	0.0488	0.5159
TC1100001721.mm.1	1.03	T	Wnt3	wingless-type MMTV integration site family, member 3; wingless-related MMTV integration site 3	Coding	-9.74	0.0037	0.2415
TC0500003186.mm.1	1.44	T	Trafd1	TRAF type zinc finger domain containing 1	Multiple_Complex	-9.72	0.0174	0.3868
TC0500003739.mm.1	1.04	T	Fbxo24	F-box protein 24	Coding	-9.65	0.0173	0.3861
TC0600001258.mm.1	-1.2	T	Irak2	interleukin-1 receptor-associated kinase 2	Multiple_Complex	-9.64	0.0016	0.1776
TC0200002425.mm.1	-1.04	T	Bpi	bactericidal permeablility increasing protein	Coding	-9.64	0.0124	0.3515
TC1300002463.mm.1	-3.21	T	Iqgap2	IQ motif containing GTPase activating protein 2	Multiple_Complex	-9.59	0.0063	0.2863
TC1900001729.mm.1	9.05	T	Shtn1	shootin 1	Multiple_Complex	-9.57	0.0049	0.2651
TC0900001846.mm.1	-1.01	T	Col5a3	collagen, type V, alpha 3	Multiple_Complex	-9.54	0.0023	0.2053
TC1100000058.mm.1	1.23	T	Ap1b1	adaptor protein complex AP-1, beta 1 subunit	Multiple_Complex	-9.51	0.0072	0.2982
TC0700000531.mm.1	-1.11	T	4930432E11Rik	RIKEN cDNA 4930432E11 gene	Coding	-9.48	0.0129	0.3549
TC1100000238.mm.1	-1.3	T	Xpo1	exportin 1, CRM1 homolog (yeast)	Multiple_Complex	-9.46	0.0193	0.3974
TC0200005267.mm.1	-1.13	T	1700028P15Rik	RIKEN cDNA 1700028P15 gene	NonCoding	-9.46	0.0066	0.2908
TC0800001544.mm.1	1.26	T	Cog2	component of oligomeric golgi complex 2	Multiple_Complex	-9.46	0.0125	0.3524
TC0200004453.mm.1	-1.03	T	Sptbn5	spectrin beta, non-erythrocytic 5	Multiple_Complex	-9.45	0.0101	0.3324
TC0400001600.mm.1	1.03	T	Ahdc1	AT hook, DNA binding motif, containing 1	Multiple_Complex	-9.45	0.0177	0.3882
TC1500001151.mm.1	-1.04	T	C7	complement component 7	Multiple_Complex	-9.44	0.0027	0.2169
TC0600003108.mm.1	1.02	T	C1s1	complement component 1, s subcomponent 1	Multiple_Complex	-9.42	0.0022	0.2027
TC1600000298.mm.1	1.16	T	Ephb3	Eph receptor B3	Multiple_Complex	-9.41	0.0027	0.2177
TC0300001479.mm.1	1.12	T			NonCoding	-9.41	0.0039	0.2461
TC0400002402.mm.1	1.05	T			NonCoding	-9.4	0.0089	0.319
TC0500000876.mm.1	-1.01	T	Fam47e	family with sequence similarity 47, member E	Coding	-9.37	0.0193	0.3979
TC0500001587.mm.1	1.22	T	Srrm3	serine/arginine repetitive matrix 3	Multiple_Complex	-9.37	0.022	0.4128
TC1700001160.mm.1	1.17	T	Birc6	baculoviral IAP repeat-containing 6; baculoviral IAP repeat-containing 6 (Birc6), mRNA.	Multiple_Complex	-9.37	0.0052	0.2695
TC0100001145.mm.1	-1.07	T	Thsd7b	thrombospondin, type I, domain containing 7B	Multiple_Complex	-9.36	0.041	0.4914
TC0300000112.mm.1	1.2	T	2610100L16Rik	RIKEN cDNA 2610100L16 gene; RIKEN cDNA 2610100L16 gene (2610100L16Rik), non-coding RNA.	NonCoding	-9.35	0.0183	0.3921
TC1500001255.mm.1	-1.01	T	C030047K22Rik; RP23-339H16.1	RIKEN cDNA C030047K22 gene [Source:MGI Symbol;Acc:MGI:1924868]; novel transcript	NonCoding	-9.29	0.0112	0.3405
TC0200001951.mm.1	-1.1	T	Slc20a1	solute carrier family 20, member 1	Multiple_Complex	-9.29	0.0371	0.4779
TC0700000853.mm.1	-1	T	Bcat2	branched chain aminotransferase 2, mitochondrial	Multiple_Complex	-9.28	0.0122	0.3494
TC1000003094.mm.1	-1.05	T	Mettl21b	methyltransferase like 21B	Coding	-9.25	0.0232	0.419
TC0500003573.mm.1	1.12	T	Tecpr1	tectonin beta-propeller repeat containing 1	Multiple_Complex	-9.24	0.0008	0.1347
TC0200000461.mm.1	-1	T	Adamts13	a disintegrin-like and metallopeptidase (reprolysin type) with thrombospondin type 1 motif, 13; Synthetic construct Mus musculus clone IMAGE:100062198, MGC:190410 a disintegrin-like and metallopeptidase (reprolysin type) with thrombospondin type 1 motif, 13 (Adamts13) mRNA, encodes complete protein.	Multiple_Complex	-9.23	0.0025	0.2126
TC0100003566.mm.1	-12.82	T	Atp1a2	ATPase, Na+/K+ transporting, alpha 2 polypeptide	Multiple_Complex	-9.21	0.0298	0.4496
TC0800003227.mm.1	-1.16	T	Mef2b	myocyte enhancer factor 2B; myocyte enhancer factor 2B (Mef2b), transcript variant 1, mRNA.	Coding	-9.2	0.0032	0.2284	Alternative 5' Donor Site	0.2
TC1500000543.mm.1	1.01	T	Them6	thioesterase superfamily member 6	Coding	-9.18	0.0107	0.3366
TC0500001860.mm.1	2.04	T	Fry	furry homolog (Drosophila)	Multiple_Complex	-9.17	0.0002	0.0751
TC1800000042.mm.1	-1.04	T			NonCoding	-9.17	0.0097	0.3283
TC0100003795.mm.1	-1	T	Rps6kc1	ribosomal protein S6 kinase polypeptide 1	Multiple_Complex	-9.16	0.0027	0.2177
TC1800000620.mm.1	-2.01	T	Camk2a	calcium/calmodulin-dependent protein kinase II alpha	Multiple_Complex	-9.15	0.0174	0.3864
TC0400001310.mm.1	-1.28	T			NonCoding	-9.15	0.0066	0.2901
TC1900000650.mm.1	1.04	T	Hif1an	hypoxia-inducible factor 1, alpha subunit inhibitor	Multiple_Complex	-9.13	0.0024	0.2083
TC0500003117.mm.1	2.19	T	Srrm4	serine/arginine repetitive matrix 4	Multiple_Complex	-9.1	0.0019	0.19
TC0700000023.mm.1	-4.51	T	Ttyh1	tweety homolog 1 (Drosophila)	Multiple_Complex	-9.08	5.31e-05	0.0406
TC1100001288.mm.1	-1.09	T	1700125H20Rik	RIKEN cDNA 1700125H20 gene	Multiple_Complex	-9.05	0.0057	0.2768
TC0700004620.mm.1	-1.03	T	Sbsn	suprabasin	Coding	-9.04	0.0087	0.3168
TC0200005429.mm.1	-1.76	T	Chrna4	cholinergic receptor, nicotinic, alpha polypeptide 4	Coding	-8.99	0.0074	0.3007
TC1600000854.mm.1	-1.03	T	4930578N18Rik	RIKEN cDNA 4930578N18 gene; RIKEN cDNA 4930578N18 gene (4930578N18Rik), non-coding RNA.	NonCoding	-8.97	0.0168	0.3827
TC1500001997.mm.1	-1.24	T	Smc1b	structural maintenance of chromosomes 1B	Coding	-8.97	0.009	0.3196
TC0900002455.mm.1	-1.63	T	Glce; Mir5133	glucuronyl C5-epimerase; microRNA 5133	Multiple_Complex	-8.97	0.0025	0.2126
TC1700000077.mm.1	-1.08	T	Tagap	T cell activation Rho GTPase activating protein	Coding	-8.94	0.0378	0.4809
TC0600003109.mm.1	1.01	T	C1s2	complement component 1, s subcomponent 2	Coding	-8.93	0.0039	0.2454
TC1400000271.mm.1	-1.05	T	Arhgef3	Rho guanine nucleotide exchange factor (GEF) 3; Rho guanine nucleotide exchange factor (GEF) 3 (Arhgef3), mRNA.; Rho guanine nucleotide exchange factor (GEF) 3, mRNA (cDNA clone IMAGE:3484755), partial cds.	Multiple_Complex	-8.93	0.031	0.455
TC1800000853.mm.1	-1.05	T	Gm26676; RP24-281O20.3	predicted gene, 26676 [Source:MGI Symbol;Acc:MGI:5477170]; novel transcript, antisense to Kcng2	NonCoding	-8.93	0.0021	0.1962
TC0700004650.mm.1	2.16	T	Ipw; Snord116l1; Snord116l2; Snord116	imprinted gene in the Prader-Willi syndrome region; small nucleolar RNA, C/D box 116-like 1 (Snord116l1), small nucleolar RNA.; small nucleolar RNA, C/D box 116-like 2 (Snord116l2), small nucleolar RNA.; imprinted gene in the Prader-Willi syndrome region (Ipw), non-coding RNA.; small nucleolar RNA, C/D box 116 cluster	Multiple_Complex	-8.88	0.0338	0.4657
TC0300002220.mm.1	1.55	T	Gucy1a3; Mir7010	guanylate cyclase 1, soluble, alpha 3; microRNA 7010	Multiple_Complex	-8.88	0.0046	0.2594
TC1300000635.mm.1	-1.03	T	Cdhr2	cadherin-related family member 2	Coding	-8.87	0.0195	0.3986
TC1300002324.mm.1	-1.15	T			NonCoding	-8.82	0.0307	0.4535
TC0900003028.mm.1	1.23	T	Hemk1	HemK methyltransferase family member 1	Multiple_Complex	-8.82	0.0034	0.2344
TC0800000874.mm.1	-1.09	T	Zfp827	zinc finger protein 827	Multiple_Complex	-8.82	0.0153	0.372	Alternative 3' Acceptor Site	0.2
TC0X00000884.mm.1	1.52	T	Arx	aristaless related homeobox	Multiple_Complex	-8.81	0.0332	0.4642
TC0400001188.mm.1	1.1	T	Bend5	BEN domain containing 5	Multiple_Complex	-8.8	0.021	0.4067	Alternative 3' Acceptor Site	0.23
TC1000001593.mm.1	-1.42	T	Timeless	timeless circadian clock 1	Multiple_Complex	-8.77	0.0266	0.4351
TC1100001353.mm.1	-1.04	T	Mpo	myeloperoxidase	Multiple_Complex	-8.76	0.0057	0.2779
TC0200000740.mm.1	1.01	T	Kynu	kynureninase (L-kynurenine hydrolase); kynureninase (L-kynurenine hydrolase) (Kynu), mRNA.	Multiple_Complex	-8.75	0.0286	0.4439
TC1900000026.mm.1	1.01	T	Cdk2ap2	CDK2-associated protein 2	Multiple_Complex	-8.74	0.0008	0.1337
TC1100003564.mm.1	-1.02	T	Epn3	epsin 3	Multiple_Complex	-8.74	0.0068	0.2935
TC1300000104.mm.1	-1.07	T	Gm20043	PREDICTED: predicted gene, 20043 (Gm20043), miscRNA.	NonCoding	-8.74	0.004	0.2478
TC0500002470.mm.1	-1.03	T	Gm3716	predicted gene 3716; predicted gene 3716 (Gm3716), non-coding RNA.	NonCoding	-8.73	0.0429	0.4981
TC1100002770.mm.1	1.01	T	Tnip1	TNFAIP3 interacting protein 1	Multiple_Complex	-8.7	0.0135	0.3596
TC0100000381.mm.1	1.04	T	Hibch	3-hydroxyisobutyryl-Coenzyme A hydrolase	Multiple_Complex	-8.62	0.0149	0.3691
TC1900000739.mm.1	1.1	T	Gm26629	predicted gene, 26629 [Source:MGI Symbol;Acc:MGI:5477123]	NonCoding	-8.61	0.0043	0.2541
TC0500002865.mm.1	4.52	T	Mapk10	mitogen-activated protein kinase 10; mitogen activated protein kinase 10	Multiple_Complex	-8.61	0.0015	0.1764
TC1800001216.mm.1	-1.11	T	Diaph1	diaphanous related formin 1	Multiple_Complex	-8.6	0.005	0.2671
TC0600000254.mm.1	1.06	T			NonCoding	-8.53	0.0498	0.5188
TC1700000512.mm.1	-1.02	T	Gm16758; RP23-137I7.1	predicted gene, 16758 [Source:MGI Symbol;Acc:MGI:4439682]; novel transcript	NonCoding	-8.52	0.0081	0.3094
TC0700002594.mm.1	1.05	T	Zfp61	zinc finger protein 61	Multiple_Complex	-8.5	0.02	0.4015
TC1600000376.mm.1	-1.03	T	Il1rap	interleukin 1 receptor accessory protein	Multiple_Complex	-8.49	0.0077	0.3052	Alternative 3' Acceptor Site	0.21
TC0100000803.mm.1	1.05	T			NonCoding	-8.48	0.0214	0.4088
TC0600000289.mm.1	1.04	T	2210408F21Rik	RIKEN cDNA 2210408F21 gene	NonCoding	-8.46	0.001	0.1462
TC1700001163.mm.1	-1.79	T	Ttc27	tetratricopeptide repeat domain 27	Coding	-8.44	0.0056	0.2752
TC0800002808.mm.1	1.72	T	Fam96b	family with sequence similarity 96, member B	Multiple_Complex	-8.42	0.0022	0.1997
TC1400002120.mm.1	-1.12	T	Gzmb	granzyme B	Coding	-8.41	0.0187	0.3946
TC0700000026.mm.1	-1.28	T			NonCoding	-8.41	0.0123	0.3499
TC0400003124.mm.1	1.07	T	Dock7	dedicator of cytokinesis 7	Multiple_Complex	-8.41	0.0226	0.4156
TC1900000017.mm.1	1.2	T	Suv420h1	suppressor of variegation 4-20 homolog 1 (Drosophila)	Multiple_Complex	-8.4	0.0335	0.4648
TC1400002759.mm.1	-1.04	T	Nalcn	sodium leak channel, non-selective	Multiple_Complex	-8.39	0.003	0.225
TC1100002515.mm.1	1.28	T	Tenm2	teneurin transmembrane protein 2	Multiple_Complex	-8.37	0.0046	0.26	Intron Retention	0.37
TC0200002066.mm.1	-1.06	T	Platr3; RP23-464H11.1	pluripotency associated transcript 3 [Source:MGI Symbol;Acc:MGI:3651129]; novel transcript	NonCoding	-8.36	0.0088	0.3176
TC1500002264.mm.1	-1.13	T	Krt75	keratin 75	Coding	-8.36	0.0037	0.2408
TC1800000954.mm.1	-1.07	T	Armc4	armadillo repeat containing 4	Coding	-8.35	0.0305	0.4529
TC1200001010.mm.1	-1.05	T	Slc24a4	solute carrier family 24 (sodium/potassium/calcium exchanger), member 4	Coding	-8.29	0.0394	0.4865
TC1200001621.mm.1	1.06	T	Atxn7l1os2; RP24-80F17.2	ataxin 7-like 1, opposite strand 2 [Source:MGI Symbol;Acc:MGI:1923086]; novel transcript (4930556N08Rik)	NonCoding	-8.28	0.0071	0.2968
TC0800003009.mm.1	-1.05	T	Pkd1l2	polycystic kidney disease 1 like 2	Multiple_Complex	-8.26	0.0304	0.4524
TC0500003629.mm.1	-1.38	T	Flt1	FMS-like tyrosine kinase 1	Multiple_Complex	-8.24	0.0178	0.3885
TC0700001988.mm.1	1.44	T	Dpysl4	dihydropyrimidinase-like 4	Multiple_Complex	-8.24	0.0036	0.2389
TC0100002603.mm.1	-1.17	T	Glb1l	galactosidase, beta 1-like	Multiple_Complex	-8.24	0.0107	0.3362	Alternative 3' Acceptor Site	0.21
TC1100001466.mm.1	-1.04	T	Gm11528; RP23-17C2.1	predicted gene 11528 [Source:MGI Symbol;Acc:MGI:3649788]; novel transcript	NonCoding	-8.23	0.0073	0.2998
TC1100004067.mm.1	1.28	T	Hid1	HID1 domain containing	Multiple_Complex	-8.21	7.33e-05	0.0468
TC1400002158.mm.1	-1.06	T	1700129C05Rik	RIKEN cDNA 1700129C05 gene	Coding	-8.21	0.0449	0.5041
TC0900002030.mm.1	1	T	Gm3434	predicted gene 3434; predicted gene 3434 (Gm3434), non-coding RNA.	NonCoding	-8.2	0.0242	0.4234
TC1800001417.mm.1	1.03	T	Ppargc1b	peroxisome proliferative activated receptor, gamma, coactivator 1 beta	Multiple_Complex	-8.19	0.0111	0.3395
TC1700000915.mm.1	-1.03	T	AI661453	expressed sequence AI661453	Coding	-8.19	0.0226	0.4158
TC1300000592.mm.1	1.05	T	Gm8777	PREDICTED: predicted gene 8777 (Gm8777), mRNA.	Coding	-8.18	0.0023	0.2036
TC0400003769.mm.1	1	T	Grhl3	grainyhead-like 3 (Drosophila)	Coding	-8.16	0.0039	0.2454
TC0500002091.mm.1	-1.01	T	Wdr86	WD repeat domain 86; Synthetic construct Mus musculus clone IMAGE:100068110, MGC:195727 WD repeat domain 86 (Wdr86) mRNA, encodes complete protein.	Multiple_Complex	-8.15	0.0242	0.4237
TC1000003109.mm.1	1.04	T	Mbd6	methyl-CpG binding domain protein 6	Multiple_Complex	-8.13	0.0136	0.3607
TC1100002938.mm.1	1.19	T	Cenpv	centromere protein V	Multiple_Complex	-8.13	0.0443	0.5027
TC0700002134.mm.1	1.01	T	Leng1; Tmc4	leukocyte receptor cluster (LRC) member 1; transmembrane channel-like gene family 4; Synthetic construct Mus musculus clone IMAGE:100069459, MGC:199361 transmembrane channel-like gene family 4 (Tmc4) mRNA, encodes complete protein.	Multiple_Complex	-8.12	0.011	0.3385
TC1700000884.mm.1	-1.34	T	Yipf3	Yip1 domain family, member 3	Multiple_Complex	-8.11	0.0029	0.2216
TC1400001288.mm.1	-3.33	T	Cldn10	claudin 10	Coding	-8.1	0.0181	0.391
TC0100002847.mm.1	1	T	4930598F16Rik	RIKEN cDNA 4930598F16 gene; RIKEN cDNA 4930598F16 gene (4930598F16Rik), non-coding RNA.	NonCoding	-8.1	0.0003	0.0894
TC0600003493.mm.1	-1.03	T	Trbv13-1	T cell receptor beta, variable 13-1	Coding	-8.1	0.0487	0.5157
TC0X00000125.mm.1	-1.03	T	Otc	ornithine transcarbamylase	Coding	-8.08	0.0447	0.5036
TC1100003107.mm.1	-1.05	T	Pfn1	profilin 1	Multiple_Complex	-8.03	0.0457	0.5064	Alternative 5' Donor Site	0.21
TC0800001396.mm.1	-1.03	T	Bco1	beta-carotene oxygenase 1	Coding	-8.03	0.0181	0.391
TC0900000593.mm.1	1.93	T	Drd2	dopamine receptor D2	Coding	-8.02	0.0245	0.4251
TC0200004291.mm.1	-1.11	T			NonCoding	-8.02	0.0061	0.2838
TC0500001006.mm.1	-1.53	T	Ptpn13	protein tyrosine phosphatase, non-receptor type 13; Synthetic construct Mus musculus clone IMAGE:100069511, MGC:199413 protein tyrosine phosphatase, non-receptor type 13 (Ptpn13) mRNA, encodes complete protein.	Multiple_Complex	-8.02	0.0357	0.4734
TC1600000190.mm.1	-1.21	T	Prkdc	protein kinase, DNA activated, catalytic polypeptide	Multiple_Complex	-8.01	0.0027	0.218
TC0800002812.mm.1	-1.15	T	Tradd	TNFRSF1A-associated via death domain	Multiple_Complex	-8	0.0052	0.2695
TC1200001749.mm.1	-1.15	T	Eapp	E2F-associated phosphoprotein	Multiple_Complex	-7.99	0.0414	0.4928
TC1000000835.mm.1	1.59	T	Abca7	ATP-binding cassette, sub-family A (ABC1), member 7	Coding	-7.97	0.0025	0.2129
TC0700002723.mm.1	1.03	T	Sipa1l3	signal-induced proliferation-associated 1 like 3	Multiple_Complex	-7.96	0.0071	0.2964
TC1100001697.mm.1	-1.11	T	Gm16342	predicted gene 16342 [Source:MGI Symbol;Acc:MGI:3840138]	Multiple_Complex	-7.95	0.0389	0.4847
TC1700000424.mm.1	-1.38	T	Kifc5b	kinesin family member C5B	Coding	-7.94	0.0079	0.3077
TC0500000381.mm.1	1.25	T	Add1; Mir7036b	adducin 1 (alpha); microRNA 7036b	Multiple_Complex	-7.92	0.0008	0.1336
TC0700003050.mm.1	1.25	T	Ptpn5	protein tyrosine phosphatase, non-receptor type 5	Multiple_Complex	-7.91	0.0049	0.2644
TC1300001636.mm.1	-1.41	T	Hist1h2be; Hist1h1e	histone cluster 1, H2be; histone cluster 1, H1e	Multiple_Complex	-7.88	0.0211	0.4075	Alternative 3' Acceptor Site	0.21
TC0200003005.mm.1	-1.17	T	Nsun6	NOL1/NOP2/Sun domain family member 6	Multiple_Complex	-7.86	0.0105	0.3348
TC0100001382.mm.1	4.04	T	Rnasel	ribonuclease L (2, 5-oligoisoadenylate synthetase-dependent); ribonuclease L (2', 5'-oligoisoadenylate synthetase-dependent)	Multiple_Complex	-7.86	0.0156	0.3745
TC1200001461.mm.1	1.11	T	Greb1	gene regulated by estrogen in breast cancer protein; Synthetic construct Mus musculus clone IMAGE:100068132, MGC:195749 gene regulated by estrogen in breast cancer protein (Greb1) mRNA, encodes complete protein.	Multiple_Complex	-7.84	0.0036	0.2389
TC0600000735.mm.1	-1.59	T	Grid2	glutamate receptor, ionotropic, delta 2	Multiple_Complex	-7.84	0.0075	0.3013
TC0X00000373.mm.1	1.46	T	Mcts1	malignant T cell amplified sequence 1	Multiple_Complex	-7.78	0.0334	0.4648
TC0900001779.mm.1	-1.09	T	Izumo1r	IZUMO1 receptor, JUNO	Coding	-7.77	0.0003	0.0857
TC0500002988.mm.1	1.06	T	P2rx2	purinergic receptor P2X, ligand-gated ion channel, 2	Coding	-7.77	0.0069	0.2943
TC0900002913.mm.1	-1.04	T	Foxl2os	forkhead box L2, opposite strand; forkhead box L2 opposite strand transcript	NonCoding	-7.77	0.0391	0.4855
TC0100002572.mm.1	1.13	T	6030407O03Rik	RIKEN cDNA 6030407O03 gene; RIKEN cDNA 6030407O03 gene (6030407O03Rik), non-coding RNA.	NonCoding	-7.72	0.0059	0.2804
TC1600000280.mm.1	1.02	T	Abcf3	ATP-binding cassette, sub-family F (GCN20), member 3	Multiple_Complex	-7.69	0.0268	0.4361	Alternative 3' Acceptor Site	0.2
TC1700001245.mm.1	-1.01	T			NonCoding	-7.67	0.0128	0.3544
TC0900002252.mm.1	-1.14	T	Ttc12	tetratricopeptide repeat domain 12	Multiple_Complex	-7.66	0.0005	0.1091
TC0500001656.mm.1	1.31	T	Zfp157	zinc finger protein 157	Multiple_Complex	-7.66	0.0335	0.4648	Alternative 3' Acceptor Site	0.21
TC1100000302.mm.1	3.14	T	Rtn4	reticulon 4	Multiple_Complex	-7.65	0.006	0.2829
TC1400001662.mm.1	-1.08	T	Itih1	inter-alpha trypsin inhibitor, heavy chain 1	Multiple_Complex	-7.63	0.0124	0.3509
TC1700002171.mm.1	1.16	T	Tjap1	tight junction associated protein 1; tight junction associated protein 1 (Tjap1), transcript variant 1, mRNA.	Coding	-7.62	2.18e-05	0.0273
TC1600001500.mm.1	1.19	T	Nrros	negative regulator of reactive oxygen species	Multiple_Complex	-7.61	0.0346	0.4692
TC1300000443.mm.1	1.58	T	Snrnp48	small nuclear ribonucleoprotein 48 (U11/U12)	Coding	-7.61	0.0084	0.3143
TC0600000902.mm.1	-1.12	T	Eva1a	eva-1 homolog A (C. elegans)	Multiple_Complex	-7.57	0.0028	0.2196
TC1200000211.mm.1	2.42	T	Kidins220	kinase D-interacting substrate 220	Multiple_Complex	-7.56	0.0037	0.2413
TC0X00003113.mm.1	-1.94	T	Chrdl1	chordin-like 1	Coding	-7.56	0.0004	0.1009	Alternative 5' Donor Site	0.21
TC0400001232.mm.1	-1.07	T	Gm12849	predicted gene 12849 [Source:MGI Symbol;Acc:MGI:3650623]	Multiple_Complex	-7.56	0.0228	0.4166
TC1100001457.mm.1	-1.02	T	Tac4	tachykinin 4	Coding	-7.55	0.0136	0.36
TC0200002067.mm.1	1.36	T	Plcb4	phospholipase C, beta 4	Multiple_Complex	-7.53	0.0108	0.3375
TC0100000064.mm.1	-1.1	T	Sulf1	sulfatase 1	Multiple_Complex	-7.52	0.0301	0.4505
TC1700001974.mm.1	-1.07	T	Vars2	valyl-tRNA synthetase 2, mitochondrial (putative)	Multiple_Complex	-7.51	0.0039	0.2464
TC0500003717.mm.1	1.26	T	Pms2; Rsph10b	postmeiotic segregation increased 2 (S. cerevisiae); radial spoke head 10 homolog B (Chlamydomonas)	Multiple_Complex	-7.49	0.0063	0.2867
TC0200002637.mm.1	-1.18	T			NonCoding	-7.48	0.0069	0.2946
TC1200001902.mm.1	1.43	T	Rtn1	reticulon 1	Multiple_Complex	-7.47	0.0494	0.5174
TC0200001371.mm.1	1.39	T	Acp2	acid phosphatase 2, lysosomal	Multiple_Complex	-7.46	0.0055	0.2748
TC0700001382.mm.1	1.51	T	Map6	microtubule-associated protein 6	Multiple_Complex	-7.46	0.0087	0.3168	Alternative 3' Acceptor Site	0.2
TC0200001764.mm.1	-1.02	T	Zfyve19	zinc finger, FYVE domain containing 19	Multiple_Complex	-7.45	0.0151	0.3703
TC0200002395.mm.1	1.11	T	Epb41l1	erythrocyte membrane protein band 4.1 like 1	Multiple_Complex	-7.44	0.0082	0.3111
TC0500001267.mm.1	-1.36	T	Gcn1l1; Mir7029	GCN1 general control of amino-acid synthesis 1-like 1 (yeast); microRNA 7029	Multiple_Complex	-7.4	0.0088	0.3174
TC0700003648.mm.1	-1.06	T	Cemip	cell migration inducing protein, hyaluronan binding	Multiple_Complex	-7.39	0.0428	0.4977
TC0X00002803.mm.1	-1.78	T	Zdhhc15	zinc finger, DHHC domain containing 15; Synthetic construct Mus musculus clone IMAGE:100015863, MGC:183467 zinc finger, DHHC domain containing 15 (Zdhhc15) mRNA, encodes complete protein.	Coding	-7.39	0.038	0.4817
TC0700000849.mm.1	-1.08	T	Tulp2	tubby-like protein 2	Multiple_Complex	-7.38	0.0028	0.2203
TC1300002418.mm.1	-1.02	T	Rasgrf2	RAS protein-specific guanine nucleotide-releasing factor 2	Multiple_Complex	-7.38	0.0106	0.3354	Alternative 3' Acceptor Site	0.2
TC1200000320.mm.1	-1.19	T			NonCoding	-7.37	0.0024	0.2088
TC1600000961.mm.1	1.07	T	4930420G21Rik	PREDICTED: RIKEN cDNA 4930420G21 gene (4930420G21Rik), miscRNA.	NonCoding	-7.36	0.0004	0.101
TC0200004430.mm.1	-1.79	T	Gm14207	predicted gene 14207	NonCoding	-7.35	0.002	0.1932
TC1500002288.mm.1	-1.14	T	Itgb7	integrin beta 7	Coding	-7.34	0.0025	0.2096
TC0600003050.mm.1	1.22	T	Mical3	microtubule associated monooxygenase, calponin and LIM domain containing 3; microtubule associated monoxygenase, calponin and LIM domain containing 3 (Mical3), transcript variant 1, mRNA.	Multiple_Complex	-7.33	0.0188	0.3951
TC1400000942.mm.1	-4.43	T	Clu	clusterin	Multiple_Complex	-7.3	0.0214	0.4092
TC1100000426.mm.1	-1.1	T	Slu7	SLU7 splicing factor homolog (S. cerevisiae)	Multiple_Complex	-7.3	0.0471	0.5113
TC1700000646.mm.1	1.07	T	Dxo	decapping exoribonuclease	Multiple_Complex	-7.29	0.0087	0.3172	Alternative 5' Donor Site	0.2
TC1300002269.mm.1	-2.31	T	Mtrr	5-methyltetrahydrofolate-homocysteine methyltransferase reductase	Coding	-7.28	0.0121	0.3481
TC1000000889.mm.1	-1.06	T	Matk	megakaryocyte-associated tyrosine kinase	Multiple_Complex	-7.26	0.0018	0.1877
TC0700001178.mm.1	1.24	T	Tm6sf1	transmembrane 6 superfamily member 1	Multiple_Complex	-7.26	0.03	0.4503
TC1400002301.mm.1	-1.13	T	Adam7	a disintegrin and metallopeptidase domain 7	Multiple_Complex	-7.24	0.0211	0.4075
TC1600000045.mm.1	-1.09	T	Sec14l5	SEC14-like lipid binding 5; SEC14-like 5 (S. cerevisiae)	Coding	-7.23	0.0003	0.0889
TC0X00000159.mm.1	1.27	T	5730405O15Rik	RIKEN cDNA 5730405O15 gene	NonCoding	-7.23	5.23e-05	0.0403
TC1000002460.mm.1	-1.09	T	Casp14	caspase 14	Coding	-7.22	9.95e-05	0.0542
TC1500002003.mm.1	-1.16	T	Wnt7b	wingless-type MMTV integration site family, member 7B; wingless-related MMTV integration site 7B	Coding	-7.22	0.0214	0.4091
TC0300001949.mm.1	1.03	T			NonCoding	-7.21	0.0163	0.3788
TC0400003440.mm.1	1.23	T	Nfyc	nuclear transcription factor-Y gamma	Multiple_Complex	-7.21	0.0254	0.4293	Alternative 3' Acceptor Site	0.21
TC1100002702.mm.1	-1.04	T	Jade2	jade family PHD finger 2	Multiple_Complex	-7.21	0.0152	0.3715
TC0300001322.mm.1	-1.09	T	Etnppl	ethanolamine phosphate phospholyase	Multiple_Complex	-7.19	0.0023	0.2035
TC1100004145.mm.1	-1	T	Gm11723; RP23-151N19.4	predicted gene 11723 [Source:MGI Symbol;Acc:MGI:3650120]; novel transcript	NonCoding	-7.16	0.0135	0.3596
TC0700002000.mm.1	1.61	T	Zfp511	zinc finger protein 511	Coding	-7.15	0.0007	0.1298
TC0200002617.mm.1	-1.05	T			NonCoding	-7.14	0.0091	0.3211
TC1500000045.mm.1	-1.12	T	Lifr	leukemia inhibitory factor receptor	Multiple_Complex	-7.13	0.0018	0.1862
TC1800001151.mm.1	-1.09	T	4933408B17Rik	RIKEN cDNA 4933408B17 gene	Coding	-7.12	0.0469	0.5107
TC0100002314.mm.1	1.12	T	Gls	glutaminase	Multiple_Complex	-7.12	0.0029	0.2213
TC1100000902.mm.1	-1.03	T	Aloxe3	arachidonate lipoxygenase 3	Multiple_Complex	-7.12	0.0148	0.3688
TC0900000191.mm.1	1.34	T	Atg4d	autophagy related 4D, cysteine peptidase	Coding	-7.11	0.001	0.1464
TC1500001395.mm.1	-1.64	T	Ncald; Gm15941	neurocalcin delta; predicted gene 15941	Multiple_Complex	-7.11	0.0442	0.5024
TC1500000713.mm.1	-1.17	T	Sgsm3	small G protein signaling modulator 3	Multiple_Complex	-7.1	0.0439	0.5013
TC1900000888.mm.1	-1.06	T	Tcirg1	T cell, immune regulator 1, ATPase, H+ transporting, lysosomal V0 protein A3	Multiple_Complex	-7.09	0.0129	0.3549
TC0400001234.mm.1	-1.06	T			NonCoding	-7.09	0.0107	0.3366
TC0500003064.mm.1	1.03	T	Gltp	glycolipid transfer protein	Coding	-7.08	6.57e-05	0.0448
TC0300001159.mm.1	-1.61	T	Slc25a24	solute carrier family 25 (mitochondrial carrier, phosphate carrier), member 24	Multiple_Complex	-7.08	0.0066	0.2913
TC0200004485.mm.1	-1.13	T	Ppip5k1	diphosphoinositol pentakisphosphate kinase 1	Multiple_Complex	-7.08	0.0034	0.2333
TC1300001723.mm.1	1.11	T			NonCoding	-7.07	0.0023	0.2041
TC0400003689.mm.1	-1.16	T			NonCoding	-7.07	0.0415	0.4932
TC1500000606.mm.1	1	T	Mfsd3	major facilitator superfamily domain containing 3	Coding	-7.06	0.0041	0.25
TC0400002150.mm.1	1.08	T			NonCoding	-7.03	0.0024	0.2077
TC0700000567.mm.1	1.3	T	Igflr1; U2af1l4	IGF-like family receptor 1; U2 small nuclear RNA auxiliary factor 1-like 4	Multiple_Complex	-7.03	0.037	0.4776
TC1300000978.mm.1	2.28	T	C130071C03Rik; Mir9-2	RIKEN cDNA C130071C03 gene; microRNA 9-2	Multiple_Complex	-7.03	0.0066	0.2901
TC1200002296.mm.1	-1.39	T	Clmn	calmin; calmin (Clmn), transcript variant 1, mRNA.	Multiple_Complex	-7.02	0.0001	0.0637
TC0700000933.mm.1	1.09	T	Cyfip1	cytoplasmic FMR1 interacting protein 1	Multiple_Complex	-7.01	0.0098	0.3297
TC0900001647.mm.1	-1.01	T	Zkscan7	zinc finger with KRAB and SCAN domains 7	Coding	-7.01	0.0099	0.3301
TC1200000996.mm.1	-1.17	T	9030617O03Rik	RIKEN cDNA 9030617O03 gene	Multiple_Complex	-7.01	0.0028	0.2203
TC1900000728.mm.1	-1.01	T	Gsto2	glutathione S-transferase omega 2	Coding	-7.01	0.0115	0.343	Alternative 3' Acceptor Site	0.21
TC1800000961.mm.1	-1.04	T	Gjd4	gap junction protein, delta 4	Coding	-7	0.0276	0.44
TC1700000658.mm.1	-1.73	T	Vars	valyl-tRNA synthetase	Multiple_Complex	-7	0.0199	0.4008
TC0800001770.mm.1	-1.07	T	Csmd1	CUB and Sushi multiple domains 1	Multiple_Complex	-7	0.0487	0.5157
TC0700001287.mm.1	1.19	T	Dlg2	discs, large homolog 2 (Drosophila); Synthetic construct Mus musculus clone IMAGE:100015000, MGC:180335 discs, large homolog 2 (Drosophila) (Dlg2) mRNA, encodes complete protein.	Multiple_Complex	-6.99	0.0028	0.2183
TC1700001841.mm.1	1.16	T	Wiz	widely-interspaced zinc finger motifs	Multiple_Complex	-6.98	0.0075	0.3015	Alternative 3' Acceptor Site	0.2
TC1100003022.mm.1	-1.12	T	Arhgef15	Rho guanine nucleotide exchange factor (GEF) 15	Multiple_Complex	-6.97	0.0104	0.3346
TC0800002144.mm.1	-1.34	T	Klkb1; Cyp4v3	kallikrein B, plasma 1; cytochrome P450, family 4, subfamily v, polypeptide 3; kallikrein B, plasma 1 (Klkb1), mRNA.	Coding	-6.97	0.016	0.3766	Cassette Exon	0.27
TC0200003814.mm.1	1.03	T			NonCoding	-6.97	0.0043	0.2536
TC0700000079.mm.1	1.03	T	Gm16532; Olfr1344	predicted gene, 16532; olfactory receptor 1344	Multiple_Complex	-6.96	0.0057	0.2771
TC1800001479.mm.1	-1.08	T	Ccbe1	collagen and calcium binding EGF domains 1	Multiple_Complex	-6.96	0.0202	0.4025
TC1400002121.mm.1	-1.02	T	Gm10873	PREDICTED: predicted gene 10873 (Gm10873), miscRNA.	NonCoding	-6.95	0.0181	0.3911
TC0900001455.mm.1	-5.11	T	Cspg5	chondroitin sulfate proteoglycan 5	Multiple_Complex	-6.94	0.0057	0.2768
TC1200001990.mm.1	-2.27	T	Actn1	actinin, alpha 1	Multiple_Complex	-6.93	0.0018	0.1872
TC0800002844.mm.1	1.06	T	Slc12a4	solute carrier family 12, member 4	Multiple_Complex	-6.92	0.0195	0.3989
TC1800000618.mm.1	-1.09	T			NonCoding	-6.91	0.0259	0.4316
TC1400001659.mm.1	1.15	T	Prkcd	protein kinase C, delta	Multiple_Complex	-6.9	0.0002	0.0679
TC0X00000313.mm.1	1.19	T	Dock11	dedicator of cytokinesis 11	Multiple_Complex	-6.9	0.0266	0.4352
TC0900002783.mm.1	2.09	T	Snap91	synaptosomal-associated protein 91; synaptosomal-associated protein 91 (Snap91), mRNA.	Multiple_Complex	-6.9	0.0173	0.3859
TC0900001978.mm.1	-1.28	T	St14	suppression of tumorigenicity 14 (colon carcinoma)	Multiple_Complex	-6.9	0.0038	0.2425
TC0700002711.mm.1	-1.05	T	Ryr1	ryanodine receptor 1, skeletal muscle	Coding	-6.89	0.0088	0.3183
TC0500000387.mm.1	-1.02	T	Rgs12	regulator of G-protein signaling 12	Multiple_Complex	-6.87	0.0006	0.1225
TC0800001422.mm.1	-1.01	T	Dnaaf1	dynein, axonemal assembly factor 1	Coding	-6.87	0.0019	0.1903
TC0900001644.mm.1	-1.04	T	Topaz1	testis and ovary specific PAZ domain containing 1	Multiple_Complex	-6.87	0.002	0.1932
TC0400001482.mm.1	1.31	T	Gm12942; Zmym6	predicted gene 12942; zinc finger, MYM-type 6; zinc finger, MYM-type 6 (Zmym6), mRNA.	Multiple_Complex	-6.87	0.0005	0.1103
TC0900000573.mm.1	-1.02	T	Cadm1	cell adhesion molecule 1; cell adhesion molecule 1 (Cadm1), transcript variant 1, mRNA.	Multiple_Complex	-6.86	0.0179	0.39
TC1100000009.mm.1	1.1	T	Pik3ip1	phosphoinositide-3-kinase interacting protein 1; phosphoinositide-3-kinase interacting protein 1 (Pik3ip1), mRNA.	Multiple_Complex	-6.85	0.0088	0.3181
TC1000002025.mm.1	1.13	T	E130307A14Rik	RIKEN cDNA E130307A14 gene	NonCoding	-6.85	0.0101	0.3322
TC1300002237.mm.1	1.32	T	Mterf3	mitochondrial transcription termination factor 3	Multiple_Complex	-6.85	0.037	0.4778
TC1000003228.mm.1	1.18	T	Bloc1s1	biogenesis of lysosomal organelles complex-1, subunit 1; biogenesis of lysosome-related organelles complex-1, subunit 1	Multiple_Complex	-6.83	0.0031	0.2271
TC0100003505.mm.1	1	T	Hsd17b7	hydroxysteroid (17-beta) dehydrogenase 7	Multiple_Complex	-6.81	0.0014	0.1693
TC0200004833.mm.1	-1.09	T	3300002I08Rik	RIKEN cDNA 3300002I08 gene	Multiple_Complex	-6.81	0.0401	0.4885
TC0500001128.mm.1	-1.15	T	Zfp932	zinc finger protein 932	Multiple_Complex	-6.8	0.0427	0.4972
TC0500001421.mm.1	-1.03	T	Lrrc43	leucine rich repeat containing 43; leucine rich repeat containing 43 (Lrrc43), mRNA.	Coding	-6.8	0.0065	0.289
TC1700000176.mm.1	1.2	T	Ermard	ER membrane associated RNA degradation	Multiple_Complex	-6.8	0.0103	0.3337
TC0100000390.mm.1	1.05	T	Ccdc150	coiled-coil domain containing 150	Multiple_Complex	-6.79	0.0482	0.5145
TC0300001354.mm.1	-1.28	T	Ppa2	pyrophosphatase (inorganic) 2	Multiple_Complex	-6.78	0.0258	0.4315
TC1000002296.mm.1	-1.04	T			NonCoding	-6.75	0.048	0.5139
TC0200003699.mm.1	-1.07	T	Lrp2	low density lipoprotein receptor-related protein 2	Multiple_Complex	-6.75	0.0015	0.1764
TC1800001503.mm.1	-1.02	T	B430212C06Rik	RIKEN cDNA B430212C06 gene	NonCoding	-6.74	0.0174	0.3864
TC1900001020.mm.1	1.15	T	Esrra; Mir6990	estrogen related receptor, alpha; microRNA 6990	Multiple_Complex	-6.73	0.0098	0.3299
TC0400000535.mm.1	2.02	T	Tmeff1	transmembrane protein with EGF-like and two follistatin-like domains 1	Coding	-6.73	0.0013	0.1653
TC1500002284.mm.1	-1.32	T	Spryd3	SPRY domain containing 3	Multiple_Complex	-6.72	0.0092	0.3224
TC0700003497.mm.1	1.14	T			NonCoding	-6.72	0.0385	0.4834
TC1800000163.mm.1	-1.09	T	Rnf138	ring finger protein 138	Multiple_Complex	-6.72	0.0088	0.3185
TC1800000908.mm.1	-1.27	T	Rttn; Mir6359	rotatin; microRNA 6359	Multiple_Complex	-6.72	0.0483	0.5147
TC0600000560.mm.1	-1.4	T	Repin1	replication initiator 1	Multiple_Complex	-6.71	0.0437	0.5007	Alternative 3' Acceptor Site	0.2
TC1100001198.mm.1	1.03	T	Rhot1	ras homolog gene family, member T1	Multiple_Complex	-6.71	0.0063	0.2861
TC1100001568.mm.1	-2.05	T	Erbb2	v-erb-b2 erythroblastic leukemia viral oncogene homolog 2, neuro/glioblastoma derived oncogene homolog (avian)	Multiple_Complex	-6.7	0.0173	0.3863	Cassette Exon	0.23
TC1200000866.mm.1	-1.04	T	Tmem63c	transmembrane protein 63c	Coding	-6.7	0.0106	0.3357
TC1000002399.mm.1	-1.07	T	Dip2a	DIP2 disco-interacting protein 2 homolog A (Drosophila); Synthetic construct Mus musculus clone IMAGE:100069543, MGC:199445 DIP2 disco-interacting protein 2 homolog A (Drosophila) (Dip2a) mRNA, encodes complete protein.; DIP2 disco-interacting protein 2 homolog A (Drosophila) (Dip2a), mRNA.	Multiple_Complex	-6.7	0.0046	0.2583
TC0300002648.mm.1	1.24	T	Lrig2	leucine-rich repeats and immunoglobulin-like domains 2	Multiple_Complex	-6.7	0.0125	0.352
TC0200004130.mm.1	1.06	T	Dgkz	diacylglycerol kinase zeta	Multiple_Complex	-6.69	0.0075	0.3013
TC1100003286.mm.1	-1.16	T	Nek8	NIMA (never in mitosis gene a)-related expressed kinase 8	Multiple_Complex	-6.69	0.0008	0.1337
TC1900000399.mm.1	1.03	T	Dock8	dedicator of cytokinesis 8	Multiple_Complex	-6.69	0.0294	0.4479
TC0500003159.mm.1	1.06	T	Tbx3os2	T-box 3, opposite strand 2	NonCoding	-6.69	0.0159	0.3766
TC0100000697.mm.1	1.32	T	Nyap2	neuronal tyrosine-phophorylated phosphoinositide 3-kinase adaptor 2	Multiple_Complex	-6.68	0.019	0.3961
TC1100004151.mm.1	-1.01	T	Dnah17	dynein, axonemal, heavy chain 17	Coding	-6.67	0.0124	0.351
TC1700001187.mm.1	-1.88	T	Vit	vitrin	Multiple_Complex	-6.67	0.0103	0.3335
TC0100001827.mm.1	1.01	T			NonCoding	-6.66	0.0324	0.4607
TC1000002894.mm.1	-1.33	T	Tbc1d15	TBC1 domain family, member 15	Multiple_Complex	-6.66	0.0136	0.3605
TC0600003601.mm.1	-1.16	T	Foxp1	forkhead box P1	Multiple_Complex	-6.66	0.008	0.3082
TC0500002157.mm.1	-1.03	T	Otof	otoferlin	Multiple_Complex	-6.65	0.0113	0.3419
TC1200000316.mm.1	1.01	T	Agr2	anterior gradient 2	Multiple_Complex	-6.65	0.01	0.3316
TC1800000937.mm.1	1.1	T	Gm10125	predicted gene 10125	NonCoding	-6.65	0.0016	0.1785
TC1200002195.mm.1	-1.02	T	Eml5	echinoderm microtubule associated protein like 5	Multiple_Complex	-6.65	0.0348	0.4699
TC0100000230.mm.1	-1.26	T	Arhgef4; C230030N03Rik	Rho guanine nucleotide exchange factor (GEF) 4; RIKEN cDNA C230030N03 gene	Multiple_Complex	-6.63	0.0009	0.1411
TC0200001113.mm.1	-1.09	T			NonCoding	-6.62	0.0301	0.4507
TC1700002352.mm.1	-1.04	T	C3	complement component 3	Multiple_Complex	-6.62	0.0132	0.3569
TC1100001196.mm.1	1.1	T	Adap2	ArfGAP with dual PH domains 2	Coding	-6.62	0.0037	0.242
TC0900002934.mm.1	1.03	T	Il20rb	interleukin 20 receptor beta	Multiple_Complex	-6.62	0.0079	0.3079
TC0500003310.mm.1	-1.38	T	Phkg1	phosphorylase kinase gamma 1	Multiple_Complex	-6.61	0.0001	0.0637
TC1900001388.mm.1	1	T	Asah2	N-acylsphingosine amidohydrolase 2	Multiple_Complex	-6.6	0.0273	0.4384
TC1400000946.mm.1	4.13	T	Stmn4	stathmin-like 4	Multiple_Complex	-6.58	0.0015	0.1758
TC0700004184.mm.1	-1.05	T	Pdilt	protein disulfide isomerase-like, testis expressed	Coding	-6.58	0.0393	0.4862
TC0300000530.mm.1	1.08	T	Lekr1	leucine, glutamate and lysine rich 1	Multiple_Complex	-6.58	0.0421	0.4952
TC0600002920.mm.1	-1.06	T	Cidec	cell death-inducing DFFA-like effector c	Coding	-6.57	0.0202	0.4026
TC1100001650.mm.1	-1.11	T	Aoc2	amine oxidase, copper containing 2 (retina-specific)	Coding	-6.57	0.0223	0.4141
TC1500002273.mm.1	1.11	T	Krt73	keratin 73	Coding	-6.57	0.0307	0.4538
TC1600000009.mm.1	1.14	T	Zfp263	zinc finger protein 263	Multiple_Complex	-6.57	0.0023	0.2044
TC0200000499.mm.1	-1.22	T	Ttf1	transcription termination factor, RNA polymerase I	Multiple_Complex	-6.56	0.0072	0.2982	Alternative 5' Donor Site	0.21
TC1100004062.mm.1	-1.49	T	Grin2c	glutamate receptor, ionotropic, NMDA2C (epsilon 3)	Coding	-6.56	0.0473	0.5118
TC0400002837.mm.1	1.32	T	Brinp1	bone morphogenic protein/retinoic acid inducible neural specific 1	Multiple_Complex	-6.56	0.0166	0.3813
TC0300002598.mm.1	-1.05	T	Cd2	CD2 antigen	Multiple_Complex	-6.56	0.0018	0.1874
TC1100000038.mm.1	1.15	T	Tbc1d10a	TBC1 domain family, member 10a	Multiple_Complex	-6.56	9.89e-05	0.0541
TC1000001949.mm.1	-2.47	T	Hey2	hairy/enhancer-of-split related with YRPW motif 2	Multiple_Complex	-6.55	0.0174	0.3863
TC1300000779.mm.1	1	T	1810034E14Rik	RIKEN cDNA 1810034E14 gene	NonCoding	-6.55	0.0034	0.2342
TC1500002294.mm.1	1.56	T	Map3k12	mitogen-activated protein kinase kinase kinase 12	Multiple_Complex	-6.55	0.0042	0.251
TC0200003632.mm.1	-1.7	T	Kcnh7	potassium voltage-gated channel, subfamily H (eag-related), member 7	Multiple_Complex	-6.54	0.0444	0.5028
TC0500003587.mm.1	1.02	T	Kpna7	karyopherin alpha 7 (importin alpha 8)	Multiple_Complex	-6.54	0.021	0.407
TC0600001180.mm.1	-1.24	T	Cntn4	contactin 4	Multiple_Complex	-6.53	0.0008	0.1334
TC0900001892.mm.1	3.77	T	Elavl3	ELAV (embryonic lethal, abnormal vision, Drosophila)-like 3 (Hu antigen C)	Multiple_Complex	-6.53	0.0057	0.2766
TC0500003444.mm.1	1.17	T			NonCoding	-6.53	0.0018	0.1863
TC1200002049.mm.1	1.2	T	Zfyve1	zinc finger, FYVE domain containing 1	Coding	-6.52	0.0161	0.3776
TC1800000593.mm.1	-1.04	T	Adamts19	a disintegrin-like and metallopeptidase (reprolysin type) with thrombospondin type 1 motif, 19	Multiple_Complex	-6.52	0.0014	0.1715
TC0500000507.mm.1	1.07	T	Gm20700; RP23-14C20.1	predicted gene 20700 [Source:MGI Symbol;Acc:MGI:5313147]; novel transcript	NonCoding	-6.51	0.0225	0.4156
TC1500002285.mm.1	-1.1	T	Csad	cysteine sulfinic acid decarboxylase	Coding	-6.5	0.0047	0.2617
TC0800002707.mm.1	-1.11	T	Ces1h	carboxylesterase 1H	Coding	-6.5	0.0241	0.4228
TC0200003313.mm.1	1.43	T	Stxbp1	syntaxin binding protein 1	Coding	-6.5	0.0044	0.2553
TC0300000961.mm.1	-1.06	T	Acp6	acid phosphatase 6, lysophosphatidic	Multiple_Complex	-6.49	0.0151	0.3708
TC0200000783.mm.1	1.11	T	Mbd5	methyl-CpG binding domain protein 5	Multiple_Complex	-6.49	0.0365	0.4759
TC0200001798.mm.1	1.36	T	Stard9	START domain containing 9	Multiple_Complex	-6.49	0.0013	0.1679
TC0700000716.mm.1	1.03	T	4933402C06Rik	RIKEN cDNA 4933402C06 gene; RIKEN cDNA 4933402C06 gene (4933402C06Rik), non-coding RNA.	NonCoding	-6.48	0.0066	0.29
TC1100002032.mm.1	-1.03	T	Gcgr	glucagon receptor	Multiple_Complex	-6.48	0.0126	0.3533
TC0600003342.mm.1	1.01	T	Eps8	epidermal growth factor receptor pathway substrate 8; epidermal growth factor receptor pathway substrate 8 (Eps8), mRNA.	Multiple_Complex	-6.48	0.0003	0.0896
TC1800000496.mm.1	1.03	T	Gm5095	predicted gene 5095; predicted gene 5095 (Gm5095), non-coding RNA.	NonCoding	-6.48	0.0042	0.2508
TC1000002586.mm.1	-1.28	T	Appl2	adaptor protein, phosphotyrosine interaction, PH domain and leucine zipper containing 2	Multiple_Complex	-6.47	0.0045	0.2568
TC0300002371.mm.1	1	T	Npr1	natriuretic peptide receptor 1	Multiple_Complex	-6.46	0.0139	0.3627
TC1000000696.mm.1	1.11	T	Pcdh15	protocadherin 15; Synthetic construct Mus musculus clone IMAGE:100069454, MGC:199356 protocadherin 15 (Pcdh15) mRNA, encodes complete protein.; protocadherin 15 (Pcdh15), transcript variant C, mRNA.	Multiple_Complex	-6.46	0.018	0.3901
TC0600001709.mm.1	1.05	T	Lrmp	lymphoid-restricted membrane protein	Multiple_Complex	-6.46	0.0071	0.2965
TC0500001026.mm.1	1.12	T	Pkd2	polycystic kidney disease 2	Multiple_Complex	-6.45	0.0177	0.3884
TC1700001881.mm.1	-1.61	T	Kifc1	kinesin family member C1	Multiple_Complex	-6.44	0.0134	0.3584	Cassette Exon	0.25
TC0100003809.mm.1	1.22	T			NonCoding	-6.42	0.017	0.3841
TC0800000983.mm.1	1.01	T	Man2b1	mannosidase 2, alpha B1	Coding	-6.42	0.0426	0.4969
TC1900001504.mm.1	1.05	T	Tll2	tolloid-like 2	Coding	-6.41	0.01	0.3314
TC1900000950.mm.1	1.04	T	Tmem151a	transmembrane protein 151A	Multiple_Complex	-6.41	0.0063	0.2859
TC1300002200.mm.1	-1.16	T			NonCoding	-6.4	0.0444	0.5027
TC0400001770.mm.1	-1.84	T	Padi2	peptidyl arginine deiminase, type II	Multiple_Complex	-6.4	0.0488	0.5158
TC1900001505.mm.1	-2.67	T	Tm9sf3	transmembrane 9 superfamily member 3	Multiple_Complex	-6.39	0.0035	0.2362
TC0100001863.mm.1	-1.03	T	Kcnh1	potassium voltage-gated channel, subfamily H (eag-related), member 1	Multiple_Complex	-6.39	0.0128	0.3548
TC1300000948.mm.1	-1.07	T	A830082K12Rik	RIKEN cDNA A830082K12 gene	NonCoding	-6.38	0.0053	0.2707	Alternative 5' Donor Site	0.21
TC0500001021.mm.1	1.61	T	Dmp1	dentin matrix protein 1	Coding	-6.37	0.0045	0.2568
TC1900001390.mm.1	-1.07	T	Sgms1	sphingomyelin synthase 1	Multiple_Complex	-6.37	0.0042	0.2512
TC0400003880.mm.1	-1.05	T	Clcnka	chloride channel, voltage-sensitive Ka; chloride channel Ka	Multiple_Complex	-6.36	0.006	0.2821
TC0500000212.mm.1	-1.02	T	Nos3	nitric oxide synthase 3, endothelial cell	Coding	-6.35	0.0013	0.1679
TC1100002755.mm.1	-1.65	T	Pdlim4	PDZ and LIM domain 4	Multiple_Complex	-6.35	0.0099	0.3306
TC1300001177.mm.1	-1.1	T	2610204G07Rik; RP23-104G24.2	RIKEN cDNA 2610204G07 gene [Source:MGI Symbol;Acc:MGI:1919718]; novel transcript	NonCoding	-6.35	0.0499	0.5189
TC0100001245.mm.1	1.87	T	Arl8a	ADP-ribosylation factor-like 8A	Multiple_Complex	-6.35	0.002	0.1958	Alternative 5' Donor Site	0.21
TC1700000604.mm.1	1.19	T	Vps52	vacuolar protein sorting 52 (yeast)	Multiple_Complex	-6.35	0.0238	0.4218
TC0700000835.mm.1	-1.56	T	Tead2	TEA domain family member 2	Multiple_Complex	-6.35	0.0084	0.3143
TC0200004140.mm.1	-1.11	T	Cry2	cryptochrome 2 (photolyase-like)	Multiple_Complex	-6.34	0.0054	0.2727
TC1000003156.mm.1	-1.06	T	Ikzf4	IKAROS family zinc finger 4; Synthetic construct Mus musculus clone IMAGE:100064096, MGC:193467 IKAROS family zinc finger 4 (Ikzf4) mRNA, encodes complete protein.	Multiple_Complex	-6.34	0.0175	0.387
TC1400001247.mm.1	-3.1	T	Gpc5	glypican 5	Multiple_Complex	-6.34	0.029	0.4457
TC1900001361.mm.1	1.02	T	Prkg1	protein kinase, cGMP-dependent, type I	Multiple_Complex	-6.34	0.033	0.4634
TC0500002343.mm.1	-1.16	T	Qdpr	quinoid dihydropteridine reductase	Multiple_Complex	-6.32	0.0035	0.2358
TC0100001206.mm.1	-1.03	T	Ren1; Ren2	renin 1 structural; renin 2 tandem duplication of Ren1	Coding	-6.32	0.0026	0.2153
TC1000000493.mm.1	-1.72	T	Gja1	gap junction protein, alpha 1	Multiple_Complex	-6.32	0.0227	0.4165
TC0500001279.mm.1	-1.17	T			NonCoding	-6.32	0.0216	0.4102
TC0100000765.mm.1	-1.02	T	Sp140	Sp140 nuclear body protein	Multiple_Complex	-6.31	0.003	0.226
TC1100001352.mm.1	1.1	T	Bzrap1	benzodiazepine receptor associated protein 1; benzodiazepine receptor associated protein 1 (Bzrap1), mRNA.	Multiple_Complex	-6.31	0.0183	0.3918
TC1000000759.mm.1	1.03	T	Itgb2	integrin beta 2	Coding	-6.31	0.0085	0.3152
TC0100000297.mm.1	-1.04	T	Il1rl2	interleukin 1 receptor-like 2	Coding	-6.3	0.0042	0.2525
TC1100003037.mm.1	1.7	T	Chd3	chromodomain helicase DNA binding protein 3; chromodomain helicase DNA binding protein 3 (Chd3), mRNA.	Multiple_Complex	-6.3	0.0401	0.4885
TC0300002714.mm.1	1.2	T	Strip1	striatin interacting protein 1	Coding	-6.3	0.0033	0.2319
TC0300002291.mm.1	-1.05	T	Ntrk1	neurotrophic tyrosine kinase, receptor, type 1	Coding	-6.29	0.0209	0.4062
TC0400000518.mm.1	-1.04	T	Col15a1	collagen, type XV, alpha 1	Multiple_Complex	-6.29	0.0048	0.2625
TC0800002365.mm.1	-1.14	T			NonCoding	-6.29	0.0301	0.4509
TC1100002921.mm.1	1.61	T	Ulk2	unc-51 like kinase 2	Multiple_Complex	-6.28	0.0063	0.286
TC0900001475.mm.1	-1.09	T	Als2cl	ALS2 C-terminal like	Multiple_Complex	-6.28	0.0125	0.352
TC0600002918.mm.1	1.09	T	Tada3	transcriptional adaptor 3	Multiple_Complex	-6.27	0.0116	0.3438
TC1100003318.mm.1	2.51	T	Wsb1	WD repeat and SOCS box-containing 1	Multiple_Complex	-6.25	0.0078	0.3061
TC1400000776.mm.1	1.06	T	Dhrs2	dehydrogenase/reductase member 2	Coding	-6.25	0.0051	0.2686
TC0600003525.mm.1	-1.03	T	Igkv8-30; Igkv3-7; Igkj1; Igkj2; Igkj4; Igkj5; Igkc; Igkv8-26; Igkv6-17; Igkv3-12; Igkv3-9; Igkv3-5	immunoglobulin kappa chain variable 8-30; immunoglobulin kappa variable 3-7; immunoglobulin kappa joining 1; immunoglobulin kappa joining 2; immunoglobulin kappa joining 4; immunoglobulin kappa joining 5; immunoglobulin kappa constant; immunoglobulin kappa variable 8-26; immunoglobulin kappa variable 6-17; immunoglobulin kappa variable 3-12; immunoglobulin kappa variable 3-9; immunoglobulin kappa…	Multiple_Complex	-6.25	0.0309	0.4547
TC0X00000676.mm.1	-1.03	T	Xlr3b	X-linked lymphocyte-regulated 3B	Multiple_Complex	-6.25	0.0075	0.3025
TC0300001423.mm.1	2.14	T	Tspan5	tetraspanin 5	Multiple_Complex	-6.24	0.0012	0.1631
TC0100003338.mm.1	1.63	T	Brinp2	bone morphogenic protein/retinoic acid inducible neural-specific 2	Multiple_Complex	-6.24	0.0177	0.3882
TC0500001672.mm.1	-1.02	T	Cyp2w1	cytochrome P450, family 2, subfamily w, polypeptide 1	Coding	-6.24	0.0146	0.3672
TC0X00000995.mm.1	-1.02	T	Gm14858	predicted gene 14858	NonCoding	-6.23	0.0361	0.475
TC0800000446.mm.1	-1.02	T			NonCoding	-6.23	0.026	0.4326
TC0600003146.mm.1	-1.05	T	Plekhg6	pleckstrin homology domain containing, family G (with RhoGef domain) member 6	Coding	-6.22	0.0427	0.4972
TC1300001395.mm.1	2.21	T	Pfkp	phosphofructokinase, platelet	Multiple_Complex	-6.22	0.0033	0.2318
TC0200002539.mm.1	1.31	T	Zfp335os; RP23-61O3.9; Gm11458	zinc finger protein 335, opposite strand [Source:MGI Symbol;Acc:MGI:3649775]; novel transcript; predicted gene 11458	NonCoding	-6.21	0.0055	0.2747
TC1800000091.mm.1	1.01	T	Gata6	GATA binding protein 6	Coding	-6.2	0.0092	0.3223
TC1100001280.mm.1	-1.09	T	Lhx1os	LIM homeobox 1, opposite strand	NonCoding	-6.18	0.0138	0.3617
TC0600000553.mm.1	1.01	T	Sspo	SCO-spondin	Coding	-6.18	0.0057	0.2762
TC0X00001178.mm.1	1.11	T	Pcdh11x	protocadherin 11 X-linked; protocadherin 11 X-linked (Pcdh11x), mRNA.	Multiple_Complex	-6.18	0.0115	0.3433
TC0200000405.mm.1	-1.11	T	Tprn	taperin	Multiple_Complex	-6.17	0.0073	0.3
TC1100002777.mm.1	-1.02	T	Slc36a2	solute carrier family 36 (proton/amino acid symporter), member 2	Multiple_Complex	-6.16	0.005	0.266
TC0100001758.mm.1	1.18	T			NonCoding	-6.15	0.033	0.4631
TC0200004204.mm.1	-1.03	T	Prr5l	proline rich 5 like	Multiple_Complex	-6.13	0.0011	0.1518
TC0700000766.mm.1	-1.03	T	Zfp819	zinc finger protein 819	Coding	-6.13	0.0167	0.3819
TC0600000987.mm.1	1.19	T	Tia1	cytotoxic granule-associated RNA binding protein 1	Multiple_Complex	-6.13	0.0099	0.331
TC0400002426.mm.1	-1.05	T	Gm17094; RP23-143B14.2	predicted gene 17094 [Source:MGI Symbol;Acc:MGI:4937921]; Novel transcript	NonCoding	-6.11	0.0444	0.5029
TC1100003043.mm.1	1.5	T	Kdm6b	KDM1 lysine (K)-specific demethylase 6B	Multiple_Complex	-6.1	0.0026	0.2132
TC0200005505.mm.1	1.95	T	4930402H24Rik; Gm14057	RIKEN cDNA 4930402H24 gene; Ppp1r14c pseudogene	Multiple_Complex	-6.1	0.0039	0.2454
TC1100001448.mm.1	-1.01	T	Col1a1	collagen, type I, alpha 1	Multiple_Complex	-6.09	0.0191	0.3966
TC1100002731.mm.1	1.09	T	Gm12212; RP23-188H3.8	predicted gene 12212 [Source:MGI Symbol;Acc:MGI:3652263]; putative novel transcript	NonCoding	-6.09	3.96e-05	0.0357
TC1100002852.mm.1	-1.11	T	Zfp867	zinc finger protein 867	Coding	-6.09	0.0017	0.1829
TC0800000146.mm.1	-1.05	T	Cln8	ceroid-lipofuscinosis, neuronal 8	Multiple_Complex	-6.07	0.0008	0.1382
TC0600000303.mm.1	1.14	T	Plxna4os3; RP23-400K22.1	plexin A4, opposite strand 3 [Source:MGI Symbol;Acc:MGI:3651753]; novel transcript	NonCoding	-6.07	0.015	0.3697
TC0500000028.mm.1	1.01	T			NonCoding	-6.07	0.0068	0.2935
TC0400004133.mm.1	-1.04	T	Plch2	phospholipase C, eta 2; Synthetic construct Mus musculus clone IMAGE:100016294, MGC:184511 phospholipase C, eta 2 (Plch2) mRNA, encodes complete protein.	Multiple_Complex	-6.07	0.0295	0.448
TC0X00002709.mm.1	-1.06	T	Tex11	testis expressed gene 11	Coding	-6.07	0.0216	0.4098
TC1500002166.mm.1	-1.06	T	Asb8	ankyrin repeat and SOCS box-containing 8	Coding	-6.07	0.0057	0.277
TC0400004173.mm.1	1.14	T	Plekhn1	pleckstrin homology domain containing, family N member 1	Coding	-6.06	0.0229	0.4171
TC1800000706.mm.1	1.03	T	Slmo1	slowmo homolog 1 (Drosophila)	Coding	-6.05	0.002	0.1959
TC0200000319.mm.1	-1.04	T	Etl4	enhancer trap locus 4	Multiple_Complex	-6.05	0.0063	0.2858
TC1700002155.mm.1	1.31	T	Tmem63b	transmembrane protein 63b	Multiple_Complex	-6.04	0.0143	0.3652
TC0300001271.mm.1	-1.39	T	Camk2d	calcium/calmodulin-dependent protein kinase II, delta	Multiple_Complex	-6.04	0.0162	0.3788
TC0400002043.mm.1	1.01	T	Megf6	multiple EGF-like-domains 6	Multiple_Complex	-6.04	0.0078	0.3063
TC0300001476.mm.1	-1.09	T	Col24a1	collagen, type XXIV, alpha 1	Multiple_Complex	-6.04	0.0061	0.2843
TC1400000833.mm.1	1.33	T	Rcbtb1	regulator of chromosome condensation (RCC1) and BTB (POZ) domain containing protein 1	Multiple_Complex	-6.02	0.0025	0.2108
TC0700002132.mm.1	-1.26	T	Tfpt	TCF3 (E2A) fusion partner	Multiple_Complex	-6.02	0.0118	0.3455
TC0800001524.mm.1	-1.1	T	Def8	differentially expressed in FDCP 8	Coding	-6.02	0.0006	0.1229
TC1100002993.mm.1	-1.03	T	Dnah9	dynein, axonemal, heavy chain 9	Multiple_Complex	-6.01	0.0068	0.293
TC0600001974.mm.1	1.1	T	Impdh1	inosine 5-phosphate dehydrogenase 1; inosine 5'-phosphate dehydrogenase 1	Multiple_Complex	-6.01	0.012	0.3476
TC1000002093.mm.1	-1.06	T	Aim1	absent in melanoma 1	Coding	-6.01	0.0233	0.4193
TC0600001848.mm.1	-1.02	T	A430035B10Rik	RIKEN cDNA A430035B10 gene	Multiple_Complex	-6	0.0015	0.1764
TC0200005118.mm.1	-1.01	T			NonCoding	-6	0.004	0.2477
TC1600001342.mm.1	-1.01	T	Cyp2ab1	cytochrome P450, family 2, subfamily ab, polypeptide 1	Multiple_Complex	-6	0.0027	0.2177
TC0700004171.mm.1	-1.8	T	Syt17	synaptotagmin XVII; Synthetic construct Mus musculus clone IMAGE:100062552, MGC:190912 synaptotagmin XVII (Syt17) mRNA, encodes complete protein.	Coding	-6	0.0066	0.2908	Cassette Exon	0.2
TC0300003219.mm.1	1.02	T	Zfp697	zinc finger protein 697	Multiple_Complex	-5.99	0.0162	0.3783
TC1000000356.mm.1	1.02	T	Mettl24	methyltransferase like 24	Coding	-5.99	0.0043	0.253
TC0300002312.mm.1	-1.24	T	Sema4a; Mir7011	sema domain, immunoglobulin domain (Ig), transmembrane domain (TM) and short cytoplasmic domain, (semaphorin) 4A; microRNA 7011	Multiple_Complex	-5.99	0.0019	0.1905
TC0600001196.mm.1	-1.38	T	Gm19789	PREDICTED: predicted gene, 19789 (Gm19789), miscRNA.	NonCoding	-5.98	0.0307	0.4537
TC0500002503.mm.1	-1.06	T	9130230L23Rik	RIKEN cDNA 9130230L23 gene	Multiple_Complex	-5.98	0.0191	0.3964
TC1800000346.mm.1	1.01	T	Hars2	histidyl-tRNA synthetase 2, mitochondrial (putative)	Multiple_Complex	-5.97	0.0165	0.3803
TC0500001756.mm.1	-3.74	T	Nptx2	neuronal pentraxin 2	Coding	-5.97	0.0011	0.1562
TC1500002048.mm.1	1.17	T	Sbf1	SET binding factor 1	Multiple_Complex	-5.96	0.047	0.5109
TC1100004063.mm.1	-1.04	T	Fdxr	ferredoxin reductase	Multiple_Complex	-5.96	0.0007	0.1249
TC1700002815.mm.1	-1.28	T	C4a	complement component 4A (Rodgers blood group); Synthetic construct Mus musculus clone IMAGE:100069505, MGC:199407 complement component 4A (Rodgers blood group) (C4a) mRNA, encodes complete protein.	Multiple_Complex	-5.96	0.0044	0.2563
TC0700002507.mm.1	1.09	T	Pvr	poliovirus receptor	Multiple_Complex	-5.95	0.0067	0.2924
[truncated: 7,267 more rows]

## Sheet: aNSC_GSEA
GSEA
Gene Ontology : biological process, cellular Component
s-qNSC
Overlap Results
# overlaps shown:	10
# genesets in collections:	12364
# genes in comparison (n):	449
# genes in universe (N):	42766
Gene Set Name	# Genes in Gene Set (K)	Description	# Genes in Overlap (k)	k/K	p-value	FDR q-value
[truncated: 462 more rows]

## Sheet: All vs TAP
s-TAP
differentially spliced genes (DSG)
#%array_type=MTA-1_0
[truncated: 5,489 more rows]

## Sheet: TAP_GSEA
GSEA
[truncated: 480 more rows]

## Sheet: All vs iNB 
s-iNB
[truncated: 4,264 more rows]

## Sheet: iNB_GSEA
GSEA
[truncated: 490 more rows]

[truncated: 2 more sheets: All vs mNB, mNB_GSEA]
