# Supplementary material for: Switching of RNA splicing regulators in immature neuroblasts during adult neurogenesis
Source: eLife. 2024 Nov 22;12:RP87083. doi: 10.7554/eLife.87083 (PMC11584179; doi:10.7554/eLife.87083)
Supplement: Figure 2—figure supplement 2—source data 2. [file elife-87083-fig2-figsupp2-data2.xlsx]

## Sheet: qNSCvsaNSC DSG
Differentially spliced genes in the transitions s-qNSC vs s-aNSC
#%result_name=Analysis_1
#%array_type=MTA-1_0
#%annotation=MTA-1_0.r3.na36.mm10.a1.transcript.csv
#%comparison=qNSC vs aNSC
ID	Fold Change	Expressed in Both Conditions	Gene Symbol	Description	Group	Exon Splicing Index	Exon P-val	Exon FDR P-val	Exon Event Name	Exon Event Score	Exon Expressed in At least One Condition
TC1400002333.mm.1	1.38	T	Pdlim2	PDZ and LIM domain 2	Multiple_Complex	1584.79	2.92e-10	4e-07	Cassette Exon	0.27	T
TC0700004451.mm.1	-4651.69	T	Mki67	antigen identified by monoclonal antibody Ki 67	Multiple_Complex	1495.62	6.66e-09	3.34e-06	Cassette Exon	0.23	T
TC0500001927.mm.1	1.27	T	Adam22; Gm19440	a disintegrin and metallopeptidase domain 22; Synthetic construct Mus musculus clone IMAGE:100064120, MGC:193491 a disintegrin and metallopeptidase domain 22 (Adam22) mRNA, encodes complete protein.; a disintegrin and metallopeptidase domain 22 (Adam22), transcript variant 1, mRNA.; PREDICTED: predicted gene, 19440 (Gm19440), miscRNA.	Multiple_Complex	1047.64	2.71e-06	0.0003			T
TC1100001916.mm.1	2.37	T	Itgb4	integrin beta 4	Multiple_Complex	961.06	3.67e-06	0.0003			T
TC0300002296.mm.1	1.93	T	Hapln2	hyaluronan and proteoglycan link protein 2	Multiple_Complex	906.4	8.91e-09	4.06e-06	Alternative 5' Donor Site	0.27	T
TC0400002737.mm.1	2.27	T	Lpar1	lysophosphatidic acid receptor 1	Coding	721.47	5.46e-09	2.95e-06	Cassette Exon	0.36	T
TC0600001508.mm.1	-39.16	T	Foxm1; 4933413G19Rik	forkhead box M1; RIKEN cDNA 4933413G19 gene	Multiple_Complex	695.78	1.99e-07	3.72e-05			T
TC0700001275.mm.1	1.85	T	Picalm	phosphatidylinositol binding clathrin assembly protein	Multiple_Complex	685.38	6.64e-07	8.84e-05			T
TC0700002760.mm.1	6.07	T	Kirrel2	kin of IRRE like 2 (Drosophila)	Multiple_Complex	661.11	4.73e-05	0.0021			T
TC0700003517.mm.1	11.21	T	Slco3a1	solute carrier organic anion transporter family, member 3a1	Multiple_Complex	656.32	3.12e-06	0.0003			T
TC0600003169.mm.1	-620.74	T	Ccnd2	cyclin D2	Multiple_Complex	623.23	3.39e-11	1.08e-07	Alternative 3' Acceptor Site	0.23	T
TC1100003693.mm.1	-575.48	T	Top2a	topoisomerase (DNA) II alpha	Multiple_Complex	587.03	1.26e-08	5.12e-06			T
TC1700001105.mm.1	3.35	T	Epb41l3	erythrocyte membrane protein band 4.1 like 3	Multiple_Complex	560.03	5.1e-10	5.83e-07			T
TC0400004139.mm.1	3.52	T	Prkcz	protein kinase C, zeta	Multiple_Complex	492.65	2.45e-07	4.3e-05			T
TC0900002604.mm.1	3.17	T	Aqp9	aquaporin 9; aquaporin 9 (Aqp9), mRNA.	Multiple_Complex	441.63	0.0006	0.0146			T
TC1100004192.mm.1	4.98	T	Aatk	apoptosis-associated tyrosine kinase	Multiple_Complex	427.47	8.77e-10	8.29e-07			T
TC0400003368.mm.1	1.06	T	Gm1661	predicted gene 1661	Multiple_Complex	410.92	1.49e-05	0.0009			T
TC1900001509.mm.1	-346.58	T	Slit1	slit homolog 1 (Drosophila)	Multiple_Complex	362.26	1.05e-11	5.47e-08	Cassette Exon	0.2	T
TC1000003153.mm.1	22.05	T	Erbb3	v-erb-b2 erythroblastic leukemia viral oncogene homolog 3 (avian)	Coding	353.18	2.04e-06	0.0002			T
TC1500001955.mm.1	-1.03	T	Cyp2d40	cytochrome P450, family 2, subfamily d, polypeptide 40	Coding	340.2	1.13e-08	4.72e-06			T
TC1300001474.mm.1	1.01	T	Hecw1	HECT, C2 and WW domain containing E3 ubiquitin protein ligase 1; Synthetic construct Mus musculus clone IMAGE:100063269, MGC:191045 HECT, C2 and WW domain containing E3 ubiquitin protein ligase 1 (Hecw1) mRNA, encodes complete protein.	Multiple_Complex	334.32	4.38e-08	1.25e-05			T
TC1800001017.mm.1	2.7	T	Aqp4	aquaporin 4	Multiple_Complex	325.76	1.03e-07	2.33e-05			T
TC0300001856.mm.1	-284.76	T	Ccna2	cyclin A2	Multiple_Complex	321.36	1.58e-07	3.15e-05			T
TC1000001090.mm.1	1.43	T	Anks1b	ankyrin repeat and sterile alpha motif domain containing 1B	Multiple_Complex	294.43	4.17e-05	0.0019			T
TC0700004624.mm.1	-252.85	T	Plk1	polo-like kinase 1	Coding	275.72	1.88e-13	4.53e-09	Cassette Exon	0.23	T
TC1500001953.mm.1	1.1	T	Cyp2d13	cytochrome P450, family 2, subfamily d, polypeptide 13	Multiple_Complex	265.64	5.32e-09	2.89e-06			T
TC0200002406.mm.1	-7.11	T	Gm14277	predicted gene 14277	Multiple_Complex	259.14	1.91e-07	3.6e-05			T
TC1400000940.mm.1	-205.4	T	Pbk	PDZ binding kinase	Multiple_Complex	241.32	1.95e-10	2.98e-07			T
TC0100003814.mm.1	-189.54	T	Dtl	denticleless homolog (Drosophila)	Multiple_Complex	239.87	6.92e-07	9.09e-05			T
TC0100003010.mm.1	2.58	T	Tmem163	transmembrane protein 163	Multiple_Complex	239.73	7.82e-05	0.0031			T
TC0500000008.mm.1	-174.12	T	Cdk6	cyclin-dependent kinase 6	Multiple_Complex	239.6	2.33e-07	4.14e-05			T
TC0200003654.mm.1	3.39	T	Grb14	growth factor receptor bound protein 14	Multiple_Complex	235.32	5.73e-09	3.06e-06	Cassette Exon	0.22	T
TC1000003052.mm.1	10.54	T	Srgap1	SLIT-ROBO Rho GTPase activating protein 1	Multiple_Complex	217.87	0.0012	0.0229			T
TC1000000661.mm.1	15.87	T	Ank3	ankyrin 3, epithelial	Multiple_Complex	216.31	3.79e-07	5.87e-05			T
TC1300001722.mm.1	-337.81	T	Sox4	SRY (sex determining region Y)-box 4; SRY-box containing gene 4	Multiple_Complex	209.97	3.75e-11	1.1e-07	Alternative 3' Acceptor Site	0.23	T
TC0600001398.mm.1	-1.08	T	Clec4a3	C-type lectin domain family 4, member a3	Coding	197.8	4.36e-10	5.16e-07			T
TC0700001280.mm.1	33.75	T	Sytl2	synaptotagmin-like 2; synaptotagmin-like 2 (Sytl2), transcript variant 3, mRNA.; synaptotagmin-like 2 (Sytl2), transcript variant 2, mRNA.; synaptotagmin-like 2 (Sytl2), transcript variant 1, mRNA.; synaptotagmin-like 2 (Sytl2), transcript variant 4, mRNA.; synaptotagmin-like 2 (Sytl2), transcript variant 5, mRNA.	Multiple_Complex	191.71	1.42e-05	0.0009	Cassette Exon	0.29	T
TC1100002233.mm.1	2.61	T	Cobl	cordon-bleu WH2 repeat	Multiple_Complex	190.14	7.51e-06	0.0005	Cassette Exon	0.27	T
TC1300001558.mm.1	-391.43	T	Hist1h2ak	histone cluster 1, H2ak	Coding	189.02	1.62e-09	1.24e-06	Alternative 3' Acceptor Site	0.23	T
TC1200001314.mm.1	3.23	T	Rapgef5	Rap guanine nucleotide exchange factor (GEF) 5	Multiple_Complex	187.55	7.8e-08	1.92e-05			T
TC0700000777.mm.1	20.34	T	Klk6	kallikrein related-peptidase 6	Coding	183.02	8e-06	0.0006			T
TC1500001956.mm.1	1.07	T	Cyp2d41-ps	cytochrome P450, family 2, subfamily d, member 41, pseudogene	Multiple_Complex	181.42	2.99e-07	4.96e-05			T
TC0100003233.mm.1	7.45	T	Pla2g4a	phospholipase A2, group IVA (cytosolic, calcium-dependent)	Multiple_Complex	178.15	0.0002	0.0056			T
TC0800000846.mm.1	-170.52	T	Mcm5	minichromosome maintenance deficient 5, cell division cycle 46 (S. cerevisiae)	Coding	176.71	4.34e-11	1.21e-07	Alternative 3' Acceptor Site	0.22	T
TC1000002653.mm.1	3.04	T	Ano4	anoctamin 4; Synthetic construct Mus musculus clone IMAGE:100068097, MGC:195714 anoctamin 4 (Ano4) mRNA, encodes complete protein.	Multiple_Complex	173.8	1.99e-07	3.71e-05	Cassette Exon	0.36	T
TC0600000648.mm.1	2.03	T	Chn2	chimerin 2; chimerin (chimaerin) 2	Multiple_Complex	173.68	2.71e-06	0.0003			T
TC0200003316.mm.1	1.81	T	Lrsam1	leucine rich repeat and sterile alpha motif containing 1	Multiple_Complex	171.89	1.33e-09	1.08e-06			T
TC1100004076.mm.1	-87.82	T	Hn1	hematological and neurological expressed sequence 1	Multiple_Complex	171.58	0.0001	0.0046			T
TC1300001763.mm.1	1.27	T	Serpinb1-ps1	serine (or cysteine) peptidase inhibitor, clade B, member 1, pseudogene	Multiple_Complex	170.63	2.47e-07	4.32e-05			T
TC0900001436.mm.1	3.03	T			NonCoding	169.7	1.82e-08	6.71e-06			T
TC0200002301.mm.1	-170.63	T	Tpx2	TPX2, microtubule-associated protein homolog (Xenopus laevis)	Multiple_Complex	167.5	7.29e-08	1.84e-05			T
TC1100001628.mm.1	6.52	T	Cnp	2,3-cyclic nucleotide 3 phosphodiesterase; 2',3'-cyclic nucleotide 3' phosphodiesterase	Multiple_Complex	164.2	3.87e-10	4.75e-07			T
TC1500000757.mm.1	1.16	T	Cyp2d9	cytochrome P450, family 2, subfamily d, polypeptide 9	Multiple_Complex	164.04	8.04e-08	1.96e-05			T
TC0700001151.mm.1	-83.96	T	Prc1	protein regulator of cytokinesis 1; protein regulator of cytokinesis 1 (Prc1), mRNA.	Multiple_Complex	162.72	3.39e-06	0.0003			T
TC1100002225.mm.1	2.06	T	Ddc	dopa decarboxylase	Multiple_Complex	161.25	2.7e-05	0.0014			T
TC1000001676.mm.1	1.47	T	Rmnd1; Gm5512	required for meiotic nuclear division 1 homolog (S. cerevisiae); required for meiotic nuclear division 1 pseudogene	Multiple_Complex	161.06	6.7e-07	8.89e-05	Alternative 5' Donor Site	0.44	T
TC1100000892.mm.1	-101.3	T	Aurkb	aurora kinase B	Multiple_Complex	160.3	5.86e-13	1.07e-08			T
TC1600001390.mm.1	-83.86	T	Rfc4	replication factor C (activator 1) 4	Multiple_Complex	158.25	3.97e-07	6.07e-05			T
TC1500001946.mm.1	1.17	T	Cyp2d10	cytochrome P450, family 2, subfamily d, polypeptide 10	Multiple_Complex	156.9	1.97e-07	3.68e-05			T
TC0700002044.mm.1	-2.28	T	Phrf1	PHD and ring finger domains 1	Multiple_Complex	156.53	3.09e-08	9.72e-06			T
TC0500001898.mm.1	1.24	T	Cdk14	cyclin-dependent kinase 14	Multiple_Complex	154.74	3.14e-07	5.14e-05			T
TC0800002447.mm.1	1.14	T	Cyp4f18	cytochrome P450, family 4, subfamily f, polypeptide 18	Multiple_Complex	149.54	2.49e-08	8.38e-06			T
TC0700002918.mm.1	-281.36	T	Gm5593	predicted gene 5593	Multiple_Complex	147.7	1.23e-06	0.0001			T
TC1300002086.mm.1	2.28	T	Spock1	sparc/osteonectin, cwcv and kazal-like domains proteoglycan 1	Coding	147.22	4.93e-06	0.0004	Alternative 5' Donor Site	0.25	T
TC1200001308.mm.1	-1.35	T	Ptprn2	protein tyrosine phosphatase, receptor type, N polypeptide 2	Multiple_Complex	146.9	1.14e-10	2.08e-07			T
TC0900002451.mm.1	-102.79	T	Kif23	kinesin family member 23	Coding	146.4	3.21e-11	1.05e-07			T
TC0800000629.mm.1	-387.78	T	Hmgb2	high mobility group box 2	Coding	146.19	8.91e-12	4.87e-08	Alternative 3' Acceptor Site	0.23	T
TC0500003411.mm.1	1.06	T	Ssc4d	scavenger receptor cysteine rich family, 4 domains	Coding	145.52	7.32e-07	9.5e-05			T
TC1700000047.mm.1	10.83	T	Synj2	synaptojanin 2	Multiple_Complex	144.08	2.88e-06	0.0003			T
TC1600001184.mm.1	-1.01	T	Grin2a	glutamate receptor, ionotropic, NMDA2A (epsilon 1); Synthetic construct Mus musculus clone IMAGE:100015901, MGC:183485 glutamate receptor, ionotropic, NMDA2A (epsilon 1) (Grin2a) mRNA, encodes complete protein.	Multiple_Complex	143.92	1.23e-08	5.02e-06			T
TC1600001339.mm.1	6.67	T	Map6d1	MAP6 domain containing 1	Coding	143.91	1.75e-07	3.38e-05	Alternative 5' Donor Site	0.2	T
TC0600002690.mm.1	-193.44	T	Mcm2	minichromosome maintenance deficient 2 mitotin (S. cerevisiae)	Coding	143.7	6.03e-10	6.43e-07			T
TC0200002532.mm.1	-95.04	T	Ube2c	ubiquitin-conjugating enzyme E2C	Coding	142.15	8.93e-09	4.06e-06			T
TC0200001776.mm.1	-167.74	T	Nusap1	nucleolar and spindle associated protein 1	Multiple_Complex	140.73	5.44e-06	0.0004			T
TC1500001957.mm.1	1.14	T	Cyp2d26	cytochrome P450, family 2, subfamily d, polypeptide 26	Coding	138.57	1.56e-07	3.11e-05			T
TC0400001641.mm.1	2.57	T	Paqr7	progestin and adipoQ receptor family member VII	Multiple_Complex	137.67	3.48e-09	2.12e-06	Alternative 5' Donor Site	0.27	T
TC0400003395.mm.1	2.88	T	Tmem125	transmembrane protein 125	Multiple_Complex	135.66	8.92e-10	8.34e-07	Alternative 5' Donor Site	0.23	T
TC1500001952.mm.1	1.22	T	Cyp2d34	cytochrome P450, family 2, subfamily d, polypeptide 34	Coding	133.13	3.57e-07	5.64e-05			T
TC0900000742.mm.1	1.07	T	Hcn4	hyperpolarization-activated, cyclic nucleotide-gated K+ 4; Synthetic construct Mus musculus clone IMAGE:100068371, MGC:195915 hyperpolarization-activated, cyclic nucleotide-gated K+ 4 (Hcn4) mRNA, encodes complete protein.	Coding	131.9	0.0007	0.015			T
TC0900000262.mm.1	1.72	T	Opcml	opioid binding protein/cell adhesion molecule-like	Multiple_Complex	131.31	1.31e-07	2.77e-05	Cassette Exon	0.27	T
TC0400003900.mm.1	3.4	T	Kazn	kazrin, periplakin interacting protein	Multiple_Complex	129.16	1.56e-09	1.21e-06			T
TC0600000772.mm.1	-54.63	T	Mad2l1	MAD2 mitotic arrest deficient-like 1	Multiple_Complex	129.06	1.54e-07	3.1e-05			T
TC0400004176.mm.1	2.55	T	Palm2; Pakap	paralemmin 2; paralemmin A kinase anchor protein	Multiple_Complex	127.08	8.78e-10	8.29e-07			T
TC1300002543.mm.1	-161.31	T	Ccnb1	cyclin B1	Multiple_Complex	126.86	2.67e-11	9.18e-08	Alternative 3' Acceptor Site	0.23	T
TC1800000714.mm.1	7.49	T	Ldlrad4	low density lipoprotein receptor class A domain containing 4	Coding	124.87	2.68e-08	8.79e-06			T
TC1500000760.mm.1	1.11	T	Cyp2d12	cytochrome P450, family 2, subfamily d, polypeptide 12	Multiple_Complex	123.98	2.16e-07	3.92e-05			T
TC1100002597.mm.1	4.37	T	Nipal4	NIPA-like domain containing 4	Multiple_Complex	121.93	6.03e-07	8.24e-05			T
TC0400003832.mm.1	1.41	T	Pla2g5	phospholipase A2, group V	Multiple_Complex	121.63	0.0001	0.0041			T
TC0400001215.mm.1	-81.83	T	Stil	Scl/Tal1 interrupting locus	Multiple_Complex	120.09	1.96e-10	2.98e-07			T
TC1100000547.mm.1	2.08	T	Adamts2	a disintegrin-like and metallopeptidase (reprolysin type) with thrombospondin type 1 motif, 2 (Adamts2), transcript variant 2, mRNA.; a disintegrin-like and metallopeptidase (reprolysin type) with thrombospondin type 1 motif, 2; a disintegrin-like and metallopeptidase (reprolysin type) with thrombospondin type 1 motif, 2 (Adamts2), mRNA.	Multiple_Complex	118.76	5.21e-09	2.85e-06			T
TC1000000819.mm.1	1.01	T	Misp	mitotic spindle positioning	Coding	116.97	8.92e-09	4.06e-06			T
TC0700003075.mm.1	-44.84	T	E2f8	E2F transcription factor 8	Multiple_Complex	116.1	1.67e-08	6.23e-06			T
TC1500002118.mm.1	-157.77	T	Nell2	NEL-like 2	Coding	112.56	2.29e-09	1.58e-06	Cassette Exon	0.23	T
TC1800000103.mm.1	8.51	T	Lama3	laminin, alpha 3	Coding	112.23	5.95e-09	3.12e-06	Cassette Exon	0.27	T
TC0X00000973.mm.1	1.77	T	Gjb1	gap junction protein, beta 1	Coding	112.05	9.25e-11	1.87e-07	Cassette Exon	0.27	T
TC0200004204.mm.1	9.33	T	Prr5l	proline rich 5 like	Multiple_Complex	108.27	8.2e-07	0.0001			T
TC0700000161.mm.1	-40.7	T	Lig1	ligase I, DNA, ATP-dependent	Multiple_Complex	107.66	1.13e-08	4.71e-06			T
TC0900003272.mm.1	6.99	T	Hhatl	hedgehog acyltransferase-like	Multiple_Complex	107.4	7.02e-06	0.0005			T
TC0400003390.mm.1	-110.43	T	Cdc20	cell division cycle 20	Multiple_Complex	106.1	1.95e-08	7.05e-06			T
TC0200004547.mm.1	-98.8	T	Ncaph	non-SMC condensin I complex, subunit H	Multiple_Complex	104.97	1.07e-08	4.52e-06	Alternative 5' Donor Site	0.33	T
TC0400001539.mm.1	1.28	T	Col16a1	collagen, type XVI, alpha 1	Multiple_Complex	104.34	1.61e-06	0.0002	Cassette Exon	0.27	T
TC0500000400.mm.1	6.5	T	Ablim2	actin-binding LIM protein 2; Synthetic construct Mus musculus clone IMAGE:100062123, MGC:190370 actin-binding LIM protein 2 (Ablim2) mRNA, encodes complete protein.; actin-binding LIM protein 2 (Ablim2), transcript variant 5, mRNA.; actin-binding LIM protein 2 (Ablim2), transcript variant 4, mRNA.; actin-binding LIM protein 2 (Ablim2), transcript variant 6, mRNA.	Multiple_Complex	103.06	1.97e-08	7.09e-06			T
TC0200003215.mm.1	-5.08	T	Vav2	vav 2 oncogene	Multiple_Complex	102.4	7.81e-09	3.72e-06			T
TC0600001269.mm.1	2.17	T	Hrh1	histamine receptor H1; Synthetic construct Mus musculus clone IMAGE:100015038, MGC:180343 histamine receptor H1 (Hrh1) mRNA, encodes complete protein.	Coding	101.36	6.89e-07	9.06e-05	Alternative 5' Donor Site	0.26	T
TC1400001567.mm.1	18.61	T	Kcnma1	potassium large conductance calcium-activated channel, subfamily M, alpha member 1	Multiple_Complex	101.29	0.0001	0.004			T
TC1600001827.mm.1	-36.47	T	Epha3	Eph receptor A3	Multiple_Complex	101.16	0.0014	0.0265			T
TC0600001949.mm.1	1.63	T	Tmem229a	transmembrane protein 229A	Multiple_Complex	101.05	0.0001	0.0048	Alternative 5' Donor Site	0.25	T
TC1100000422.mm.1	4.49	T	Atp10b	ATPase, class V, type 10B	Multiple_Complex	100.04	2.92e-05	0.0015			T
TC0400000861.mm.1	7.28	T	Adamtsl1	ADAMTS-like 1	Multiple_Complex	98.68	4.37e-05	0.002			T
TC0200001056.mm.1	-61.7	T	Cdca7	cell division cycle associated 7	Multiple_Complex	98.65	7.03e-06	0.0005			T
TC0300001028.mm.1	5.44	T	A230001M10Rik	RIKEN cDNA A230001M10 gene; RIKEN cDNA A230001M10 gene (A230001M10Rik), non-coding RNA.	NonCoding	98.63	7.48e-10	7.46e-07	Cassette Exon	0.35	T
TC0900003323.mm.1	1.01	T	C1qtnf5; Mfrp	C1q and tumor necrosis factor related protein 5; membrane-type frizzled-related protein	Coding	97.97	3.64e-11	1.1e-07	Alternative 5' Donor Site	0.23	T
TC0600000289.mm.1	3	T	2210408F21Rik	RIKEN cDNA 2210408F21 gene	NonCoding	97.29	1.62e-12	1.81e-08			T
TC0500002297.mm.1	1.93	T	Hs3st1	heparan sulfate (glucosamine) 3-O-sulfotransferase 1	Coding	95.37	6.21e-07	8.42e-05			T
TC0300001757.mm.1	-88.46	T	Ect2	ect2 oncogene	Multiple_Complex	94.93	1.95e-07	3.65e-05			T
TC0100002998.mm.1	5.49	T	Nckap5	NCK-associated protein 5	Multiple_Complex	94.64	0.0025	0.0389			T
TC1700000565.mm.1	1.78	T	Cyp4f37	cytochrome P450, family 4, subfamily f, polypeptide 37	Coding	93.37	3.54e-07	5.61e-05			T
TC1600000797.mm.1	-1.21	T	Vgll3	vestigial like 3 (Drosophila)	Multiple_Complex	92.79	5.59e-06	0.0004			T
TC1100002843.mm.1	2.17	T	Gjc2	gap junction protein, gamma 2	Coding	91.36	2.05e-09	1.45e-06	Alternative 5' Donor Site	0.27	T
TC0100002583.mm.1	12.34	T	Tmbim1	transmembrane BAX inhibitor motif containing 1	Multiple_Complex	91.02	8.35e-07	0.0001	Cassette Exon	0.29	T
TC0200003728.mm.1	-106.4	T	Dlx2	distal-less homeobox 2	Multiple_Complex	90.51	6.76e-13	1.16e-08	Alternative 3' Acceptor Site	0.23	T
TC0400004112.mm.1	1.89	T	Smim1	small integral membrane protein 1	Multiple_Complex	90.5	6.39e-08	1.66e-05	Cassette Exon	0.27	T
TC1100003941.mm.1	-33.25	T	Kpna2	karyopherin (importin) alpha 2	Multiple_Complex	90.23	1.79e-05	0.001			T
TC0500000997.mm.1	1.45	T	Arhgap24	Rho GTPase activating protein 24	Multiple_Complex	88.5	8.23e-12	4.81e-08	Cassette Exon	0.29	T
TC1500002214.mm.1	140.05	T	Faim2	Fas apoptotic inhibitory molecule 2; Fas apoptotic inhibitory molecule 2 (Faim2), transcript variant 2, mRNA.	Coding	88.47	0.0002	0.0072	Cassette Exon	0.31	T
TC0700004625.mm.1	6.01	T	Kctd13	potassium channel tetramerisation domain containing 13	Multiple_Complex	88.25	6.01e-09	3.14e-06	Cassette Exon	0.34	T
TC1000000735.mm.1	-1.02	T	Slc5a4a	solute carrier family 5, member 4a	Coding	88.12	7.77e-09	3.72e-06			T
TC0200001748.mm.1	-102.62	T	Knstrn	kinetochore-localized astrin/SPAG5 binding	Coding	86.92	1.36e-13	4.08e-09			T
TC0900002036.mm.1	-39.77	T	Chek1	checkpoint kinase 1	Multiple_Complex	86.9	3.55e-05	0.0017			T
TC1700000564.mm.1	1.95	T	Cyp4f16	cytochrome P450, family 4, subfamily f, polypeptide 16	Multiple_Complex	85.76	2.55e-07	4.42e-05			T
TC0700001131.mm.1	-78.65	T	Ticrr	TOPBP1-interacting checkpoint and replication regulator	Coding	85.14	2.14e-08	7.51e-06			T
TC1600001441.mm.1	4.01	T	Atp13a5	ATPase type 13A5	Coding	84.38	0.0003	0.008			T
TC0300000485.mm.1	1.35	T	Mbnl1	muscleblind-like 1 (Drosophila)	Multiple_Complex	83.99	1.07e-07	2.39e-05			T
TC0200005486.mm.1	5.73	T	Dbndd2	dysbindin (dystrobrevin binding protein 1) domain containing 2	Multiple_Complex	83.31	2.2e-07	3.97e-05	Cassette Exon	0.26	T
TC0300000521.mm.1	-1.03	T	Kcnab1	potassium voltage-gated channel, shaker-related subfamily, beta member 1	Multiple_Complex	82.94	9.87e-08	2.27e-05			T
TC1100002549.mm.1	-71.74	T	Hmmr	hyaluronan mediated motility receptor (RHAMM)	Multiple_Complex	81.78	8.12e-06	0.0006			T
TC0300000574.mm.1	-71.91	T	Smc4	structural maintenance of chromosomes 4	Multiple_Complex	81.72	3.33e-06	0.0003			T
TC1300002002.mm.1	4.19	T	Sema4d	sema domain, immunoglobulin domain (Ig), transmembrane domain (TM) and short cytoplasmic domain, (semaphorin) 4D	Multiple_Complex	80.96	1.06e-06	0.0001			T
TC0700001702.mm.1	1.72	T	9030624J02Rik	RIKEN cDNA 9030624J02 gene	Multiple_Complex	80.94	3.33e-07	5.36e-05			T
TC1200002260.mm.1	3.04	T	Prima1	proline rich membrane anchor 1; Synthetic construct Mus musculus clone IMAGE:100064076, MGC:193447 proline rich membrane anchor 1 (Prima1) mRNA, encodes complete protein.	Multiple_Complex	80.59	2.14e-08	7.52e-06	Cassette Exon	0.27	T
TC0700001287.mm.1	4.74	T	Dlg2	discs, large homolog 2 (Drosophila); Synthetic construct Mus musculus clone IMAGE:100015000, MGC:180335 discs, large homolog 2 (Drosophila) (Dlg2) mRNA, encodes complete protein.	Multiple_Complex	80.45	3.42e-05	0.0017	Cassette Exon	0.35	T
TC0300002778.mm.1	1.39	T	Amy2b	amylase 2b	Multiple_Complex	80.32	0.0001	0.0046			T
TC1200001562.mm.1	-138.9	T	Sox11	SRY (sex determining region Y)-box 11; SRY-box containing gene 11	Multiple_Complex	80.21	2.79e-14	2.1e-09			T
TC1400000156.mm.1	-1.09	T			NonCoding	80.14	4.5e-09	2.55e-06			T
TC1000001546.mm.1	-30.7	T	Cdk4	cyclin-dependent kinase 4	Multiple_Complex	80.04	2.13e-07	3.9e-05	Alternative 3' Acceptor Site	0.25	T
TC0X00001710.mm.1	-1.78	T	Mid1	midline 1; midline 1 (Mid1), transcript variant 2, mRNA.	Multiple_Complex	79.42	1.24e-05	0.0008			T
TC1700001598.mm.1	-2.06	T	Tnfrsf12a	tumor necrosis factor receptor superfamily, member 12a	Coding	79.36	3.63e-07	5.71e-05			T
TC0400000580.mm.1	6.57	T	Slc44a1	solute carrier family 44, member 1	Multiple_Complex	78.92	4.94e-08	1.38e-05			T
TC1400000764.mm.1	2.43	T	Mhrt	myosin heavy chain associated RNA transcript	Multiple_Complex	78.81	8.32e-10	8.04e-07	Cassette Exon	0.27	T
TC0100003026.mm.1	-129.52	T	Mcm6	minichromosome maintenance deficient 6 (MIS5 homolog, S. pombe) (S. cerevisiae)	Coding	78.61	2.96e-09	1.89e-06	Cassette Exon	0.23	T
TC0400003516.mm.1	-24.44	T	Cdca8	cell division cycle associated 8	Multiple_Complex	78.51	4.35e-07	6.53e-05			T
TC1500000331.mm.1	1.94	T	Oxr1	oxidation resistance 1	Multiple_Complex	75.28	0.0001	0.0037			T
TC1100003857.mm.1	-67.68	T	Kif18b	kinesin family member 18B	Multiple_Complex	75.07	1.21e-05	0.0008			T
TC0500001139.mm.1	-73.15	T	Pole	polymerase (DNA directed), epsilon	Multiple_Complex	74.96	2.32e-10	3.32e-07	Cassette Exon	0.23	T
TC1800001269.mm.1	-50.42	T	Dpysl3	dihydropyrimidinase-like 3	Multiple_Complex	74.96	2.34e-08	8.02e-06			T
TC1700000612.mm.1	1.12	T	Col11a2	collagen, type XI, alpha 2	Multiple_Complex	74.67	1.79e-09	1.34e-06	Cassette Exon	0.26	T
TC1300000179.mm.1	-11.19	T	Hist1h2bp	histone cluster 1, H2bp	Coding	74.31	7.43e-08	1.86e-05			T
TC0600001478.mm.1	-216.45	T	LOC100861633	PREDICTED: uncharacterized LOC100861633 (LOC100861633), miscRNA.	NonCoding	74.11	0.0001	0.0041			T
TC0700002477.mm.1	-325.68	T	Fosb	FBJ osteosarcoma oncogene B	Coding	74.04	1.06e-06	0.0001			T
TC1100002091.mm.1	3.17	T	Inpp5j	inositol polyphosphate 5-phosphatase J	Coding	73.59	6.95e-11	1.58e-07			T
TC0300001587.mm.1	-40.72	T	Depdc1a	DEP domain containing 1a	Coding	72.92	3.68e-07	5.76e-05			T
TC1100003562.mm.1	1.08	T	Cacna1g	calcium channel, voltage-dependent, T type, alpha 1G subunit	Multiple_Complex	71.65	1.55e-09	1.21e-06			T
TC0X00000958.mm.1	-47.66	T	Kif4	kinesin family member 4	Multiple_Complex	71.55	7.37e-09	3.58e-06	Cassette Exon	0.23	T
TC0900002173.mm.1	6.72	T	Phldb1	pleckstrin homology-like domain, family B, member 1	Multiple_Complex	71.28	5.86e-06	0.0004			T
TC0400000377.mm.1	1.47	T	Dnaic1	dynein, axonemal, intermediate chain 1	Multiple_Complex	71.25	0.0001	0.0045			T
TC0Y00000221.mm.1	-2.19	T	Gm21857; LOC100861837; Mid1	predicted gene, 21857 [Source:MGI Symbol;Acc:MGI:5434021]; PREDICTED: midline-1-like (LOC100861837), mRNA.; midline 1	Coding	71.07	2.5e-06	0.0002			T
TC1800001237.mm.1	2.95	T	Fgf1	fibroblast growth factor 1	Multiple_Complex	70.39	9.47e-06	0.0006	Cassette Exon	0.23	T
TC1300002498.mm.1	7.79	T	Arhgef28	Rho guanine nucleotide exchange factor (GEF) 28	Multiple_Complex	70.37	3.59e-06	0.0003			T
TC1800000291.mm.1	-86.59	T	Kif20a	kinesin family member 20A	Coding	70.14	1.06e-10	2.04e-07			T
TC0100002033.mm.1	-86.58	T	Mcm3	minichromosome maintenance deficient 3 (S. cerevisiae)	Coding	69.84	6.24e-13	1.1e-08			T
TC0X00002738.mm.1	-9.08	T	Rps4x	ribosomal protein S4, X-linked; ribosomal protein S4, X-linked (Rps4x), mRNA.	Multiple_Complex	68.92	3.64e-07	5.72e-05			T
TC0200003753.mm.1	11.95	T	Gpr155	G protein-coupled receptor 155; G protein-coupled receptor 155 (Gpr155), transcript variant 2, mRNA.	Multiple_Complex	68.9	1.08e-06	0.0001			T
TC0100002338.mm.1	6.09	T	Hecw2	HECT, C2 and WW domain containing E3 ubiquitin protein ligase 2	Multiple_Complex	68.82	0.0005	0.012			T
TC1100003046.mm.1	4.67	T	Efnb3	ephrin B3	Coding	68.34	1.48e-09	1.16e-06			T
TC0500000417.mm.1	6.27	T	Ppp2r2c	protein phosphatase 2, regulatory subunit B, gamma; protein phosphatase 2 (formerly 2A), regulatory subunit B (PR 52), gamma isoform	Multiple_Complex	68.16	1.48e-06	0.0002			T
TC0800001737.mm.1	6.99	T	Gas6	growth arrest specific 6	Coding	68.1	2.15e-05	0.0012			T
TC1800000834.mm.1	5.85	T	Pstpip2	proline-serine-threonine phosphatase-interacting protein 2	Coding	67.85	6.75e-06	0.0005			T
TC0700004633.mm.1	-1.12	T	Gm15448	predicted gene 15448	Coding	67.71	1.62e-06	0.0002			T
TC0100003565.mm.1	1.05	T	Atp1a4	ATPase, Na+/K+ transporting, alpha 4 polypeptide	Coding	67.65	4.2e-09	2.43e-06			T
TC1700001981.mm.1	-79.45	T	Tubb5	tubulin, beta 5 class I	Multiple_Complex	67.45	8.81e-06	0.0006			T
TC1500002100.mm.1	3.74	T	Prickle1	prickle homolog 1 (Drosophila)	Coding	67.05	8.08e-06	0.0006			T
TC0700004635.mm.1	-1.1	T	Lilra6	leukocyte immunoglobulin-like receptor, subfamily A (with TM domain), member 6	Multiple_Complex	66.93	1.26e-06	0.0001			T
TC0600003030.mm.1	2.4	T	Wnk1	WNK lysine deficient protein kinase 1	Multiple_Complex	66.6	5.45e-05	0.0024			T
TC1900001649.mm.1	5.9	T	Sorcs1	sortilin-related VPS10 domain containing receptor 1; VPS10 domain receptor protein SORCS 1	Coding	66.57	3.14e-05	0.0016			T
TC1200000203.mm.1	-121.77	T	Rrm2	ribonucleotide reductase M2	Multiple_Complex	65.76	7.64e-09	3.68e-06			T
TC0700002140.mm.1	-1.03	T	Gm10693	predicted pseudogene 10693	Pseudogene	65.54	3.02e-06	0.0003			T
TC0700001431.mm.1	2.77	T	Arap1	ArfGAP with RhoGAP domain, ankyrin repeat and PH domain 1	Multiple_Complex	65.24	0.0009	0.0191			T
TC0700004631.mm.1	-1.1	T	Pirb; Pira1	paired Ig-like receptor B; Synthetic construct Mus musculus clone IMAGE:100066306, MGC:195443 paired-Ig-like receptor A1 (Pira1) mRNA, encodes complete protein.	Multiple_Complex	64.97	2.08e-06	0.0002			T
TC0200000467.mm.1	-1.02	T	Dbh	dopamine beta hydroxylase	Multiple_Complex	64.6	3.07e-06	0.0003			T
TC1000002341.mm.1	-62.15	T	Cdk1	cyclin-dependent kinase 1	Multiple_Complex	64.22	2.6e-08	8.61e-06			T
TC0700004634.mm.1	-1.02	T	Gm14548; Pira11; Pira2; Pira4; Pira7; Pira1	predicted gene 14548; paired-Ig-like receptor A11; paired-Ig-like receptor A2; paired-Ig-like receptor A4; paired-Ig-like receptor A7; Synthetic construct Mus musculus clone IMAGE:100066286, MGC:195423 paired-Ig-like receptor A2 (Pira2) mRNA, encodes complete protein.; Synthetic construct Mus musculus clone IMAGE:100066296, MGC:195433 paired-Ig-like receptor A4 (Pira4) mRNA, encodes complete prot…	Coding	64.09	2.33e-06	0.0002			T
TC0700001651.mm.1	-8.16	T	Tead1	TEA domain family member 1	Multiple_Complex	63.8	1.98e-09	1.42e-06			T
TC0300000068.mm.1	-1.09	T	Chmp4c	charged multivesicular body protein 4C	Multiple_Complex	63.32	7.4e-06	0.0005			T
TC0100001222.mm.1	8	T	Chil1	chitinase-like 1	Multiple_Complex	63.08	0.0001	0.005			T
TC0700001185.mm.1	2.5	T	Sh3gl3	SH3-domain GRB2-like 3; SH3-domain GRB2-like 3 (Sh3gl3), mRNA.	Multiple_Complex	63.06	4.24e-07	6.41e-05	Cassette Exon	0.27	T
TC1900001444.mm.1	1.81	T	1500017E21Rik	RIKEN cDNA 1500017E21 gene	NonCoding	62.9	5.94e-06	0.0005			T
TC1500002217.mm.1	-48.64	T	Racgap1	Rac GTPase-activating protein 1	Multiple_Complex	62.72	8.27e-05	0.0032			T
TC1000002008.mm.1	-102.51	T	Marcks	myristoylated alanine rich protein kinase C substrate	Multiple_Complex	62.58	2.35e-10	3.34e-07			T
TC1100004064.mm.1	2.49	T	Fads6	fatty acid desaturase domain family, member 6	Multiple_Complex	61.62	0.0018	0.0308			T
TC1200001367.mm.1	1.03	T	Mfsd2b	major facilitator superfamily domain containing 2B	Multiple_Complex	61.58	5.42e-07	7.64e-05			T
TC0200003103.mm.1	-44.26	T	Mastl	microtubule associated serine/threonine kinase-like	Multiple_Complex	61.35	1.23e-06	0.0001			T
TC1200000142.mm.1	-61.71	T	Odc1	ornithine decarboxylase, structural 1	Coding	61.29	6.63e-12	4.53e-08	Cassette Exon	0.23	T
TC0700002138.mm.1	1.08	T	Gm15930	predicted gene 15930 [Source:MGI Symbol;Acc:MGI:3805554]	Pseudogene	61.29	3.67e-06	0.0003			T
TC1300002588.mm.1	2.53	T	Erbb2ip	Erbb2 interacting protein; Erbb2 interacting protein (Erbb2ip), transcript variant 2, mRNA.	Multiple_Complex	60.7	2.77e-06	0.0003			T
TC0800001522.mm.1	-3.94	T	Tubb3	tubulin, beta 3 class III	Coding	60.64	1.48e-08	5.73e-06			T
TC1900000645.mm.1	3.61	T	Scd3	stearoyl-coenzyme A desaturase 3	Coding	60.61	9.54e-08	2.22e-05			T
TC1200001261.mm.1	20.04	T	Inf2	inverted formin, FH2 and WH2 domain containing	Multiple_Complex	60.06	2.01e-08	7.19e-06			T
TC0100001877.mm.1	-31.59	T	Plxna2	plexin A2	Multiple_Complex	59.64	1.57e-08	5.97e-06			T
TC0800002822.mm.1	2.65	T	Tppp3	tubulin polymerization-promoting protein family member 3	Coding	59.44	5.23e-07	7.45e-05			T
TC0700002139.mm.1	-1.19	T	Gm15925	predicted gene 15925 [Source:MGI Symbol;Acc:MGI:3801830]	Pseudogene	59	1.04e-06	0.0001			T
TC0500001634.mm.1	1.66	T	Tsc22d4	TSC22 domain family, member 4	Multiple_Complex	57.99	6.37e-09	3.25e-06			T
TC1800000528.mm.1	-24.24	T	Sncaip	synuclein, alpha interacting protein (synphilin)	Multiple_Complex	57.94	0.0018	0.0315			T
TC0600002200.mm.1	-35.54	T	Ezh2	enhancer of zeste 2 polycomb repressive complex 2 subunit; enhancer of zeste homolog 2 (Drosophila)	Multiple_Complex	57.92	7.97e-07	0.0001	Alternative 3' Acceptor Site	0.25	T
TC1700002618.mm.1	-1.08	T			NonCoding	57.63	2.47e-07	4.32e-05			T
TC1900000508.mm.1	-24.78	T	Kif20b	kinesin family member 20B	Coding	57.59	1.58e-06	0.0002			T
TC1700001003.mm.1	-57.78	T	Uhrf1	ubiquitin-like, containing PHD and RING finger domains, 1	Multiple_Complex	57.52	8.06e-09	3.8e-06			T
TC0500000422.mm.1	-40.6	T	Crmp1	collapsin response mediator protein 1; collapsin response mediator protein 1 (Crmp1), transcript variant 1, mRNA.	Multiple_Complex	56.97	1.93e-11	7.88e-08			T
TC1100003814.mm.1	1.74	T	Etv4	ets variant 4; Synthetic construct Mus musculus clone IMAGE:100016259, MGC:184513 ets variant gene 4 (E1A enhancer binding protein, E1AF) (Etv4) mRNA, encodes complete protein.; ets variant gene 4 (E1A enhancer binding protein, E1AF)	Multiple_Complex	56.96	6.3e-07	8.52e-05			T
TC1300002102.mm.1	-1.11	T	Slc28a3	solute carrier family 28 (sodium-coupled nucleoside transporter), member 3	Multiple_Complex	56.77	1.81e-07	3.46e-05			T
TC1100001135.mm.1	-19.14	T	Sez6	seizure related gene 6	Multiple_Complex	56.63	1.26e-07	2.68e-05			T
TC0400003369.mm.1	1.31	T	Rnf220	ring finger protein 220	Multiple_Complex	56.47	8.27e-06	0.0006			T
TC0200001221.mm.1	-1.21	T	Ypel4	yippee-like 4 (Drosophila)	Multiple_Complex	56.42	1.94e-07	3.65e-05			T
TC1900001504.mm.1	1.06	T	Tll2	tolloid-like 2	Coding	56.36	1.36e-08	5.39e-06	Cassette Exon	0.27	T
TC0500003176.mm.1	-1.06	T	Oas3	2-5 oligoadenylate synthetase 3; 2'-5' oligoadenylate synthetase 3	Multiple_Complex	56.3	4.04e-06	0.0003			T
TC1100001632.mm.1	1.58	T	Stat5a	signal transducer and activator of transcription 5A	Multiple_Complex	56.28	1.82e-05	0.001			T
TC0700004632.mm.1	1.01	T	Pira1	paired-Ig-like receptor A1 (Pira1), mRNA.	Multiple_Complex	55.86	2.62e-06	0.0002			T
TC1800000989.mm.1	2.94	T	Mir1901; Gm6277	microRNA 1901; predicted gene 6277	Multiple_Complex	55.78	3.6e-07	5.67e-05			T
TC0900002593.mm.1	-79.42	T	Ccnb2	cyclin B2	Coding	55.7	2.42e-09	1.64e-06			T
TC1100002557.mm.1	1.09	T	Gabra1	gamma-aminobutyric acid (GABA) A receptor, subunit alpha 1	Multiple_Complex	55.64	3.48e-05	0.0017			T
TC1700002815.mm.1	4.19	T	C4a	complement component 4A (Rodgers blood group); Synthetic construct Mus musculus clone IMAGE:100069505, MGC:199407 complement component 4A (Rodgers blood group) (C4a) mRNA, encodes complete protein.	Multiple_Complex	55.44	4.83e-05	0.0022			T
TC0400001741.mm.1	1.53	T	Capzb	capping protein (actin filament) muscle Z-line, beta; capping protein (actin filament) muscle Z-line, beta (Capzb), transcript variant 4, mRNA.	Multiple_Complex	55.43	1.11e-07	2.45e-05			T
TC0500001332.mm.1	-1.57	T	Rbm19	RNA binding motif protein 19	Coding	55.3	2.4e-08	8.12e-06			T
TC0600001327.mm.1	1.52	T	Rasgef1a; Mir7044	RasGEF domain family, member 1A; microRNA 7044	Multiple_Complex	55.22	0.0007	0.0149			T
TC1700001938.mm.1	-27.84	T	D17H6S56E-5	DNA segment, Chr 17, human D6S56E 5	Coding	55.06	1.17e-07	2.55e-05			T
TC1300001889.mm.1	1.51	T	A330076C08Rik	RIKEN cDNA A330076C08 gene; RIKEN cDNA A330076C08 gene (A330076C08Rik), transcript variant 2, non-coding RNA.	NonCoding	54.83	0.0004	0.0106	Alternative 5' Donor Site	0.26	T
TC0900000854.mm.1	-80.47	T	2810417H13Rik	RIKEN cDNA 2810417H13 gene	Multiple_Complex	54.36	3.73e-09	2.22e-06			T
TC0700000988.mm.1	16.93	T	Pcsk6	proprotein convertase subtilisin/kexin type 6	Multiple_Complex	54.3	0.0017	0.0294			T
TC0300002543.mm.1	1.76	T	Pde4dip; Mir7225	phosphodiesterase 4D interacting protein (myomegalin); microRNA 7225	Multiple_Complex	54.16	4.73e-05	0.0021	Cassette Exon	0.2	T
TC0200001757.mm.1	-75.52	T	Casc5	cancer susceptibility candidate 5	Multiple_Complex	53.99	0.0017	0.0295			T
TC0100003783.mm.1	-31.67	T	Cenpf	centromere protein F	Multiple_Complex	53.69	5.18e-06	0.0004			T
TC0100003069.mm.1	24.83	T	Cdk18	cyclin-dependent kinase 18	Coding	53.63	3.57e-05	0.0017			T
TC0X00000059.mm.1	-1.09	T	Cacna1f	calcium channel, voltage-dependent, alpha 1F subunit; Synthetic construct Mus musculus clone IMAGE:100062089, MGC:190349 calcium channel, voltage-dependent, alpha 1F subunit (Cacna1f) mRNA, encodes complete protein.	Multiple_Complex	53.63	8.64e-07	0.0001			T
TC0600003598.mm.1	16.62	T	Cml3	camello-like 3; camello-like 3, mRNA (cDNA clone MGC:103086 IMAGE:4975242), complete cds.	Multiple_Complex	53.44	5.14e-08	1.42e-05			T
TC0700001624.mm.1	-69.59	T	Wee1	WEE 1 homolog 1 (S. pombe)	Multiple_Complex	53.2	2.82e-12	2.62e-08			T
TC1000000904.mm.1	2.25	T	Tle2	transducin-like enhancer of split 2, homolog of Drosophila E(spl); Synthetic construct Mus musculus clone IMAGE:100063585, MGC:191102 transducin-like enhancer of split 2, homolog of Drosophila E(spl) (Tle2) mRNA, encodes complete protein.	Multiple_Complex	53.16	3.65e-08	1.1e-05			T
TC1700001130.mm.1	1.08	T	Myom1	myomesin 1	Multiple_Complex	53.11	1.34e-06	0.0001			T
TC1100002694.mm.1	-46.77	T	Hnrnpab	heterogeneous nuclear ribonucleoprotein A/B	Coding	52.88	2.32e-10	3.32e-07			T
TC0600000606.mm.1	5.49	T	Nfe2l3	nuclear factor, erythroid derived 2, like 3	Multiple_Complex	52.85	2.56e-08	8.55e-06			T
TC0500001931.mm.1	-18.51	T	Dbf4	DBF4 homolog (S. cerevisiae)	Multiple_Complex	52.79	3.54e-06	0.0003			T
TC0200005249.mm.1	7.7	T	Bcas1	breast carcinoma amplified sequence 1	Multiple_Complex	52.66	3.58e-06	0.0003	Alternative 5' Donor Site	0.25	T
TC0900001430.mm.1	1.49	T	Pfkfb4	6-phosphofructo-2-kinase/fructose-2,6-biphosphatase 4	Multiple_Complex	52.4	1.02e-05	0.0007	Cassette Exon	0.23	T
TC1200001420.mm.1	-25.13	T	Gen1	Gen homolog 1, endonuclease (Drosophila)	Multiple_Complex	52.25	2.28e-05	0.0012			T
TC1700001166.mm.1	3.1	T	Ltbp1	latent transforming growth factor beta binding protein 1	Multiple_Complex	51.83	4.4e-07	6.57e-05	Cassette Exon	0.36	T
TC0X00003379.mm.1	1.51	T	G530011O06Rik	RIKEN cDNA G530011O06 gene	NonCoding	51.71	4.24e-05	0.002			T
TC1000001366.mm.1	7	T	Cpm	carboxypeptidase M	Multiple_Complex	51.65	5.93e-07	8.15e-05			T
TC1300000366.mm.1	1.24	T	Serpinb1b	serine (or cysteine) peptidase inhibitor, clade B, member 1b	Coding	51.39	5.31e-10	5.95e-07	Cassette Exon	0.21	T
TC1100003414.mm.1	-1.11	T	Lhx1	LIM homeobox protein 1	Multiple_Complex	51.35	4.38e-06	0.0004			T
TC0500001673.mm.1	1.16	T	Gpr146; D830046C22Rik	G protein-coupled receptor 146; RIKEN cDNA D830046C22 gene	Multiple_Complex	51.27	2.19e-07	3.97e-05	Alternative 5' Donor Site	0.21	T
TC0700000512.mm.1	1.04	T	Rinl	Ras and Rab interactor-like	Coding	51.26	3.05e-09	1.92e-06			T
TC0200004713.mm.1	-38.97	T	Jag1	jagged 1	Multiple_Complex	51.19	5.81e-07	8.04e-05			T
TC1100003999.mm.1	4.34	T	Abca8a	ATP-binding cassette, sub-family A (ABC1), member 8a; Synthetic construct Mus musculus clone IMAGE:100069476, MGC:199378 ATP-binding cassette, sub-family A (ABC1), member 8a (Abca8a) mRNA, encodes complete protein.	Multiple_Complex	51.15	0.0018	0.0308			T
TC0100001744.mm.1	11.28	T	1700047M11Rik	RIKEN cDNA 1700047M11 gene; RIKEN cDNA 1700047M11 gene (1700047M11Rik), non-coding RNA.	NonCoding	50.9	4.51e-06	0.0004			T
TC1600000376.mm.1	8.41	T	Il1rap	interleukin 1 receptor accessory protein	Multiple_Complex	50.86	8.41e-09	3.88e-06			T
TC0800000821.mm.1	-1.52	T	Ap1m1	adaptor-related protein complex AP-1, mu subunit 1	Multiple_Complex	50.73	1.28e-08	5.16e-06			T
TC0700001713.mm.1	12.91	T			NonCoding	50.64	7.61e-11	1.66e-07			T
TC1200002389.mm.1	-2.75	T	Hsp90aa1	heat shock protein 90, alpha (cytosolic), class A member 1; heat shock protein 90, alpha (cytosolic), class A member 1 (Hsp90aa1), mRNA.	Multiple_Complex	50.56	8.98e-09	4.08e-06			T
TC1900000529.mm.1	-282.13	T	Kif11	kinesin family member 11	Coding	50.07	7.88e-09	3.74e-06			T
TC0600002312.mm.1	1.05	T	9130019P16Rik	RIKEN cDNA 9130019P16 gene	NonCoding	49.47	3.9e-06	0.0003			T
TC0700001673.mm.1	2.21	T	Insc	inscuteable homolog (Drosophila)	Multiple_Complex	49.38	3.11e-07	5.1e-05			T
TC0800001126.mm.1	2.21	T	Adgrg1	adhesion G protein-coupled receptor G1	Multiple_Complex	48.98	5.54e-06	0.0004			T
TC1100003993.mm.1	68.07	T	Fam20a	family with sequence similarity 20, member A	Multiple_Complex	48.87	0.0009	0.0194			T
TC1800001122.mm.1	-1.05	T	Proc	protein C; protein C (Proc), transcript variant 4, long non-coding RNA.	Multiple_Complex	48.85	1.27e-08	5.16e-06			T
TC0600000044.mm.1	1.41	T	Tac1	tachykinin 1	Multiple_Complex	48.69	0.0017	0.0301	Cassette Exon	0.24	T
TC1600001443.mm.1	152.22	T	Atp13a4	ATPase type 13A4	Multiple_Complex	48.68	2.07e-06	0.0002	Cassette Exon	0.25	T
TC0100001189.mm.1	1.04	T	Klhdc8a	kelch domain containing 8A	Coding	48.52	8.78e-08	2.1e-05			T
TC1800001000.mm.1	2.92	T	Osbpl1a	oxysterol binding protein-like 1A; Synthetic construct Mus musculus clone IMAGE:100016432, MGC:184561 oxysterol binding protein-like 1A (Osbpl1a) mRNA, encodes complete protein.; oxysterol binding protein-like 1A (Osbpl1a), transcript variant 7, non-coding RNA.	Multiple_Complex	48.39	8.25e-08	2e-05	Cassette Exon	0.36	T
TC0400004224.mm.1	-21.75	T	Ephb2	Eph receptor B2; Synthetic construct Mus musculus clone IMAGE:100062018, MGC:190326 Eph receptor B2 (Ephb2) mRNA, encodes complete protein.	Multiple_Complex	48.2	5.47e-06	0.0004			T
TC0100001303.mm.1	-79.42	T	Aspm	asp (abnormal spindle)-like, microcephaly associated (Drosophila)	Multiple_Complex	48.12	2.31e-05	0.0012			T
TC1500002292.mm.1	2.26	T	Sp7	Sp7 transcription factor 7	Coding	48.01	3.54e-06	0.0003			T
TC1100001848.mm.1	5.2	T	Kcnj16	potassium inwardly-rectifying channel, subfamily J, member 16	Coding	47.92	5.48e-07	7.69e-05			T
TC1000000820.mm.1	-19.02	T	Ptbp1	polypyrimidine tract binding protein 1	Multiple_Complex	47.81	1.81e-07	3.46e-05			T
TC1100002107.mm.1	4.51	T	Sec14l2	SEC14-like lipid binding 2; SEC14-like 2 (S. cerevisiae)	Multiple_Complex	47.78	8.76e-05	0.0034			T
TC1600000045.mm.1	5.85	T	Sec14l5	SEC14-like lipid binding 5; SEC14-like 5 (S. cerevisiae)	Coding	47.68	1e-05	0.0007	Cassette Exon	0.21	T
TC0100002772.mm.1	-12.95	T	A730008H23Rik; Hjurp; 6430706D22Rik	RIKEN cDNA A730008H23 gene; Holliday junction recognition protein; RIKEN cDNA 6430706D22 gene; RIKEN cDNA 6430706D22 gene (6430706D22Rik), non-coding RNA.	Multiple_Complex	47.56	1.03e-07	2.33e-05			T
TC0800000661.mm.1	4.78	T	Spock3	sparc/osteonectin, cwcv and kazal-like domains proteoglycan 3	Multiple_Complex	47.55	1.19e-07	2.59e-05			T
TC0200001741.mm.1	-71.42	T	Bub1b	budding uninhibited by benzimidazoles 1 homolog, beta (S. cerevisiae)	Multiple_Complex	47.34	5.36e-05	0.0023	Cassette Exon	0.23	T
TC0300002350.mm.1	1.16	T	Zbtb7b	zinc finger and BTB domain containing 7B	Multiple_Complex	47.29	3.07e-09	1.92e-06			T
TC0500001102.mm.1	1.57	T	Gm10419	predicted gene 10419	Multiple_Complex	47.28	1.7e-05	0.001	Alternative 5' Donor Site	0.24	T
TC0800000773.mm.1	-1.25	T	Map1s	microtubule-associated protein 1S	Coding	47.25	5.4e-07	7.63e-05			T
TC1300000148.mm.1	7.15	T	Elmo1	engulfment and cell motility 1; engulfment and cell motility 1 (Elmo1), transcript variant 2, non-coding RNA.	Multiple_Complex	46.96	8.17e-05	0.0032			T
TC0200005015.mm.1	-60.52	T	Rbl1	retinoblastoma-like 1 (p107)	Multiple_Complex	46.83	2.29e-06	0.0002			T
TC1000001149.mm.1	3.42	T	Tmcc3	transmembrane and coiled coil domains 3	Multiple_Complex	46.76	1.05e-07	2.36e-05	Cassette Exon	0.3	T
TC1900000495.mm.1	3.39	T	Stambpl1	STAM binding protein like 1	Multiple_Complex	46.48	0.0003	0.0079			T
TC1600001528.mm.1	2.02	T	Kalrn	kalirin, RhoGEF kinase	Multiple_Complex	46.38	3.62e-05	0.0017			T
TC1000000171.mm.1	1.79	T	Sgk1	serum/glucocorticoid regulated kinase 1	Multiple_Complex	45.84	0.0004	0.0102			T
TC0200004568.mm.1	-45.55	T	Bub1	budding uninhibited by benzimidazoles 1 homolog (S. cerevisiae)	Multiple_Complex	45.73	1.81e-06	0.0002			T
TC0200000636.mm.1	9.79	T	Gsn	gelsolin	Multiple_Complex	45.64	1.23e-05	0.0008	Cassette Exon	0.31	T
TC0700001888.mm.1	3.6	T	Inpp5f	inositol polyphosphate-5-phosphatase F	Multiple_Complex	45.29	2.88e-05	0.0015			T
TC1900000991.mm.1	3.91	T	Cdc42ep2	CDC42 effector protein (Rho GTPase binding) 2	Coding	45.01	3.6e-11	1.1e-07			T
TC1100000880.mm.1	-21.15	T	Myh10	myosin, heavy polypeptide 10, non-muscle	Multiple_Complex	44.87	7.01e-07	9.18e-05			T
TC0100000364.mm.1	40.26	T	Tmeff2	transmembrane protein with EGF-like and two follistatin-like domains 2	Multiple_Complex	44.86	0.001	0.0199			T
TC0600002654.mm.1	1.02	T	Gkn3	gastrokine 3	Coding	44.62	1.55e-07	3.11e-05			T
TC1100002170.mm.1	-34.07	T	H2afv	H2A histone family, member V	Coding	44.59	1.23e-06	0.0001	Cassette Exon	0.23	T
TC1200002406.mm.1	2.71	T	Gm266	predicted gene 266	Coding	44.47	0.0005	0.0129	Alternative 5' Donor Site	0.27	T
TC1400000684.mm.1	1.01	T	Trav21-dv12; Trac; Trav6-7-dv9; Traj58; Traj56; Traj53; Traj52; Traj50; Traj49; Traj48; Traj45; Traj44; Traj43; Traj42; Traj41; Traj40; Traj39; Traj37; Traj34; Traj33; Traj32; Traj31; Traj30; Traj28; Traj27; Traj26; Traj24; Traj23; Traj22; Traj21; Traj20; Traj19; Traj18; Traj17; Traj16; Traj15; Traj13; Traj12; Traj11; Traj9; Traj7; Traj6; Traj4; Trav6-6; Trav11; Trav3-4; Trav12-3; Traj5; Trav20; …	T cell receptor alpha variable 21-DV12; T cell receptor alpha constant; T cell receptor alpha variable 6-7-DV9; T cell receptor alpha joining 58; T cell receptor alpha joining 56; T cell receptor alpha joining 53; T cell receptor alpha joining 52; T cell receptor alpha joining 50; T cell receptor alpha joining 49; T cell receptor alpha joining 48; T cell receptor alpha joining 45; T cell receptor…	Multiple_Complex	44.06	4.97e-07	7.18e-05	Alternative 3' Acceptor Site	0.25	T
TC0400001035.mm.1	6.61	T	Dnajc6	DnaJ (Hsp40) homolog, subfamily C, member 6	Multiple_Complex	43.99	2.36e-05	0.0013			T
TC0200004129.mm.1	-3.6	T	Mdk	midkine; midkine (Mdk), transcript variant 1, mRNA.	Coding	43.84	1.67e-08	6.24e-06			T
TC1400001931.mm.1	-42.36	T	Wdhd1	WD repeat and HMG-box DNA binding protein 1	Multiple_Complex	43.83	1.23e-06	0.0001			T
TC1400001935.mm.1	-20.93	T	Dlgap5	discs, large (Drosophila) homolog-associated protein 5	Multiple_Complex	43.8	1.8e-09	1.34e-06			T
TC1500000747.mm.1	-29.7	T	Sept3	septin 3	Multiple_Complex	43.63	3.18e-08	9.91e-06			T
TC0X00001338.mm.1	187.79	T	Plp1	proteolipid protein (myelin) 1	Multiple_Complex	43.61	7.34e-08	1.84e-05			T
TC1500000766.mm.1	1.98	T	Serhl	serine hydrolase-like	Multiple_Complex	43.55	4.16e-06	0.0003			T
TC1500002147.mm.1	-1.05	T	Slc38a4	solute carrier family 38, member 4	Coding	43.46	2.36e-05	0.0013			T
TC1000000150.mm.1	17.5	T	Map7	microtubule-associated protein 7	Coding	43.37	5.13e-07	7.34e-05	Cassette Exon	0.31	T
TC0400003730.mm.1	-1.05	T	Catsper4	cation channel, sperm associated 4	Multiple_Complex	43.36	4.27e-08	1.23e-05			T
TC0300001322.mm.1	42.41	T	Etnppl	ethanolamine phosphate phospholyase	Multiple_Complex	43.18	3.19e-08	9.92e-06			T
TC1200000503.mm.1	-1.17	T	Ctage5	CTAGE family, member 5	Multiple_Complex	43.16	0.0003	0.0077	Cassette Exon	0.49	T
TC0400003207.mm.1	2.02	T	Mroh7	maestro heat-like repeat family member 7	Multiple_Complex	43.15	4.28e-08	1.24e-05			T
TC0400001728.mm.1	2.47	T	Camk2n1	calcium/calmodulin-dependent protein kinase II inhibitor 1	Multiple_Complex	43.08	1.38e-06	0.0002			T
TC0900001652.mm.1	-52.95	T	Kif15	kinesin family member 15	Multiple_Complex	43.05	2.08e-09	1.47e-06			T
TC0400000567.mm.1	-35.56	T	Smc2	structural maintenance of chromosomes 2	Multiple_Complex	42.82	1.2e-06	0.0001			T
TC1100001586.mm.1	-28.19	T	Cdc6	cell division cycle 6	Multiple_Complex	42.8	1.9e-06	0.0002			T
TC1100002180.mm.1	5.29	T	Nacad	NAC alpha domain containing	Multiple_Complex	42.75	6.75e-06	0.0005			T
TC1700000431.mm.1	-1.1	T	Itpr3; Mir7677	inositol 1,4,5-triphosphate receptor 3; microRNA 7677	Multiple_Complex	42.73	3.1e-06	0.0003			T
TC0400003077.mm.1	-34.34	T	Gm12703; RP23-135A21.4	predicted gene 12703 [Source:MGI Symbol;Acc:MGI:3650667]; Novel Transcript	NonCoding	42.71	1.41e-05	0.0009			T
TC0700000290.mm.1	1.7	T	Eml2; Mir330	echinoderm microtubule associated protein like 2; microRNA 330	Multiple_Complex	42.55	1.4e-06	0.0002			T
TC0500003487.mm.1	8.26	T	Adap1	ArfGAP with dual PH domains 1	Multiple_Complex	42.5	3.73e-07	5.81e-05			T
TC0700003771.mm.1	4.56	T	Capn5	calpain 5	Multiple_Complex	42.37	2.75e-06	0.0003			T
TC0100001511.mm.1	2.22	T	Gm20743	predicted gene, 20743	NonCoding	42.26	7.55e-11	1.65e-07	Cassette Exon	0.28	T
TC1500002223.mm.1	-22.8	T	Lima1	LIM domain and actin binding 1	Multiple_Complex	41.9	3.08e-10	4.12e-07	Cassette Exon	0.23	T
TC1700002497.mm.1	-50.97	T	Ndc80	NDC80 homolog, kinetochore complex component (S. cerevisiae)	Multiple_Complex	41.88	1.71e-10	2.77e-07	Alternative 3' Acceptor Site	0.23	T
TC0800003005.mm.1	-1.08	T			NonCoding	41.69	2.28e-08	7.91e-06	Alternative 3' Acceptor Site	0.25	T
TC1100003245.mm.1	4.39	T	Abr	active BCR-related gene	Multiple_Complex	41.29	1.47e-08	5.7e-06			T
TC0500001096.mm.1	-3.55	T	Ccdc18	coiled-coil domain containing 18	Multiple_Complex	41.25	0.0002	0.0065			T
TC0500003694.mm.1	6.04	T	Stard13	StAR-related lipid transfer (START) domain containing 13	Multiple_Complex	41.15	0.0002	0.0066	Cassette Exon	0.31	T
TC0X00000933.mm.1	3.4	T	Stard8	START domain containing 8	Multiple_Complex	40.96	0.0016	0.0284			T
TC0200001115.mm.1	-6.7	T	Hnrnpa3; Gm6793	heterogeneous nuclear ribonucleoprotein A3; heterogeneous nuclear ribonucleoprotein A3 pseudogene	Multiple_Complex	40.91	2.99e-05	0.0015			T
TC0700002972.mm.1	1.88	T	Myh14	myosin, heavy polypeptide 14; myosin, heavy polypeptide 14 (Myh14), mRNA.	Multiple_Complex	40.74	0.0033	0.048			T
TC1500002289.mm.1	2.23	T	Rarg	retinoic acid receptor, gamma	Multiple_Complex	40.62	1.95e-06	0.0002			T
TC0300002481.mm.1	2.7	T	Adamtsl4	ADAMTS-like 4	Multiple_Complex	40.58	1.91e-10	2.95e-07			T
TC1800000568.mm.1	-44.17	T	Lmnb1	lamin B1	Multiple_Complex	40.48	2.31e-08	7.95e-06	Cassette Exon	0.21	T
TC0500001301.mm.1	1.46	T	Nos1	nitric oxide synthase 1, neuronal; Synthetic construct Mus musculus clone IMAGE:100068135, MGC:195752 nitric oxide synthase 1, neuronal (Nos1) mRNA, encodes complete protein.	Multiple_Complex	40.4	0.002	0.0332	Cassette Exon	0.28	T
TC1200001262.mm.1	11.93	T	Adssl1	adenylosuccinate synthetase like 1	Coding	40.29	4.02e-06	0.0003			T
TC0900000313.mm.1	23.67	T	Kirrel3	kin of IRRE like 3 (Drosophila)	Multiple_Complex	40.23	1.27e-07	2.7e-05			T
TC0700002120.mm.1	-1.02	T	AU018091	expressed sequence AU018091	Coding	40.19	0.0001	0.0045			T
TC0200002835.mm.1	-35.93	T	Myt1	myelin transcription factor 1	Multiple_Complex	40.13	1.34e-08	5.36e-06			T
TC0200003300.mm.1	1.55	T	Dnm1	dynamin 1	Multiple_Complex	40.04	0.0002	0.0068			T
TC0800000923.mm.1	2.2	T	Clgn	calmegin	Multiple_Complex	39.97	0.0005	0.0115			T
TC1500000604.mm.1	-1.05	T	Ppp1r16a	protein phosphatase 1, regulatory (inhibitor) subunit 16A	Multiple_Complex	39.76	1.22e-08	4.98e-06			T
TC0200004437.mm.1	1.44	T	Exd1	exonuclease 3-5 domain containing 1; exonuclease 3'-5' domain containing 1	Coding	39.7	0.0002	0.0051			T
TC1000000696.mm.1	1.2	T	Pcdh15	protocadherin 15; Synthetic construct Mus musculus clone IMAGE:100069454, MGC:199356 protocadherin 15 (Pcdh15) mRNA, encodes complete protein.; protocadherin 15 (Pcdh15), transcript variant C, mRNA.	Multiple_Complex	39.66	0.0007	0.0165			T
TC1400002081.mm.1	1.59	T	Jph4	junctophilin 4	Multiple_Complex	39.65	3.68e-11	1.1e-07	Cassette Exon	0.2	T
TC1500001940.mm.1	-24.07	T	Cenpm	centromere protein M	Coding	39.59	0.0016	0.029			T
TC0300000949.mm.1	-17.67	T	Txnip	thioredoxin interacting protein	Multiple_Complex	39.53	3.34e-07	5.37e-05	Alternative 3' Acceptor Site	0.26	T
TC0300001805.mm.1	139.91	T	Pex5l	peroxisomal biogenesis factor 5-like; peroxisomal biogenesis factor 5-like (Pex5l), transcript variant 1, mRNA.; peroxisomal biogenesis factor 5-like (Pex5l), transcript variant 2, mRNA.	Multiple_Complex	39.49	1.19e-07	2.59e-05			T
TC0200005220.mm.1	5	T	Atp9a	ATPase, class II, type 9A	Multiple_Complex	39.33	8.55e-05	0.0033			T
TC0800002359.mm.1	-20.82	T	Lzts1	leucine zipper, putative tumor suppressor 1	Multiple_Complex	39.3	1.2e-07	2.6e-05			T
TC1700000706.mm.1	-26.98	T	Nrm	nurim (nuclear envelope membrane protein)	Coding	39.1	2.56e-07	4.43e-05			T
TC1500000303.mm.1	-1.31	T	Rims2	regulating synaptic membrane exocytosis 2	Multiple_Complex	38.98	0.0002	0.0064			T
TC0200000507.mm.1	-1.71	T	Rapgef1	Rap guanine nucleotide exchange factor (GEF) 1	Multiple_Complex	38.97	0.0001	0.0042			T
TC1300000998.mm.1	22.57	T	Edil3	EGF-like repeats and discoidin I-like domains 3	Multiple_Complex	38.89	2.15e-05	0.0012			T
TC1800001156.mm.1	-28.43	T	Cdc25c	cell division cycle 25C	Coding	38.51	2.84e-07	4.77e-05			T
TC0X00002046.mm.1	1.27	T	Gm14569	predicted gene 14569	Multiple_Complex	38.51	4.17e-06	0.0003			T
TC0100000927.mm.1	9.16	T	Sned1; Mir6901	sushi, nidogen and EGF-like domains 1; microRNA 6901; sushi, nidogen and EGF-like domains 1 (Sned1), mRNA.	Multiple_Complex	38.49	0.0002	0.0055			T
TC1400000946.mm.1	6.65	T	Stmn4	stathmin-like 4	Multiple_Complex	38.48	4.06e-07	6.19e-05			T
TC0900000500.mm.1	33.15	T	Mcam	melanoma cell adhesion molecule	Multiple_Complex	38.41	0.0002	0.0056			T
TC0300000238.mm.1	1.65	T	Sox2ot; Mir1897	SOX2 overlapping transcript (non-protein coding); microRNA 1897	Multiple_Complex	38.25	0.0024	0.0385			T
TC1800001637.mm.1	48.66	T	Slc14a1	solute carrier family 14 (urea transporter), member 1	Multiple_Complex	38.11	6.4e-10	6.7e-07			T
TC0700000465.mm.1	1.13	T	Akt2	thymoma viral proto-oncogene 2	Multiple_Complex	38.03	4.15e-07	6.3e-05			T
TC0X00000808.mm.1	3.34	T	Dmd	dystrophin, muscular dystrophy	Multiple_Complex	38.01	6.34e-05	0.0026			T
TC0100002543.mm.1	-1.04	T	Abca12	ATP-binding cassette, sub-family A (ABC1), member 12	Multiple_Complex	37.92	6.57e-07	8.78e-05			T
TC1400002290.mm.1	-33.24	T	Cdca2	cell division cycle associated 2	Multiple_Complex	37.64	1.84e-09	1.36e-06	Alternative 5' Donor Site	0.33	T
TC1800000869.mm.1	41.84	T	Mbp	myelin basic protein	Multiple_Complex	37.46	0.002	0.0341			T
TC1400002150.mm.1	-44.97	T	Ska3	spindle and kinetochore associated complex subunit 3	Coding	37.45	5.46e-09	2.95e-06			T
TC1900000415.mm.1	5.88	T	Vldlr	very low density lipoprotein receptor	Multiple_Complex	37.44	5.13e-06	0.0004			T
TC1700001173.mm.1	22.5	T	Rasgrp3	RAS, guanyl releasing protein 3	Coding	37.33	9.15e-05	0.0035	Cassette Exon	0.25	T
TC1100002001.mm.1	1.97	T	Slc26a11	solute carrier family 26, member 11	Multiple_Complex	37.3	0.001	0.0202			T
TC0700001169.mm.1	46.14	T	Pde8a	phosphodiesterase 8A	Multiple_Complex	37.29	1.08e-06	0.0001			T
TC1400002293.mm.1	18.85	T	Dock5	dedicator of cytokinesis 5	Multiple_Complex	37.29	2.49e-06	0.0002	Cassette Exon	0.24	T
TC0900001864.mm.1	1.51	T	S1pr5	sphingosine-1-phosphate receptor 5	Coding	37.28	2.81e-08	9.1e-06			T
TC0700001555.mm.1	1.11	T	Timm10b; Dnhd1	translocase of inner mitochondrial membrane 10B; dynein heavy chain domain 1	Multiple_Complex	37.28	8.77e-08	2.09e-05			T
TC0100001858.mm.1	-17.62	T	Nek2	NIMA (never in mitosis gene a)-related expressed kinase 2	Multiple_Complex	37.11	3.4e-08	1.04e-05			T
TC0800000366.mm.1	2.96	T	Dusp26	dual specificity phosphatase 26 (putative)	Multiple_Complex	37.09	5.36e-10	6e-07			T
TC0400001514.mm.1	1.58	T	Fndc5	fibronectin type III domain containing 5	Coding	37.06	9.23e-09	4.15e-06			T
TC0300002114.mm.1	1.9	T	Rarres1	retinoic acid receptor responder (tazarotene induced) 1	Coding	37.04	2.64e-05	0.0014	Alternative 5' Donor Site	0.27	T
TC0500001428.mm.1	-44.95	T	Kntc1	kinetochore associated 1	Coding	37.02	8.43e-10	8.13e-07			T
TC0300001206.mm.1	2.54	T	Plppr5	phospholipid phosphatase related 5	Coding	36.94	0.0003	0.0076			T
TC1000002467.mm.1	4.75	T	Plpp2	phospholipid phosphatase 2	Multiple_Complex	36.88	0.0003	0.0075			T
TC0400000499.mm.1	8.5	T	Tmod1	tropomodulin 1	Multiple_Complex	36.83	4.14e-08	1.2e-05			T
TC0300002312.mm.1	5.69	T	Sema4a; Mir7011	sema domain, immunoglobulin domain (Ig), transmembrane domain (TM) and short cytoplasmic domain, (semaphorin) 4A; microRNA 7011	Multiple_Complex	36.82	0.0005	0.0122			T
TC0200004701.mm.1	6.71	T	Pak7	p21 protein (Cdc42/Rac)-activated kinase 7; Synthetic construct Mus musculus clone IMAGE:100062872, MGC:190981 p21 (CDKN1A)-activated kinase 7 (Pak7) mRNA, encodes complete protein.	Multiple_Complex	36.71	0.0003	0.0083			T
TC0800000126.mm.1	-13.92	T	Tfdp1	transcription factor Dp 1	Coding	36.34	1.17e-05	0.0007			T
TC1100002109.mm.1	1.73	T	Ccdc157	coiled-coil domain containing 157; coiled-coil domain containing 157 (Ccdc157), transcript variant 1, mRNA.	Multiple_Complex	36.34	4.93e-07	7.14e-05	Alternative 3' Acceptor Site	0.31	T
TC0400004094.mm.1	-1.03	T	Rnf207	ring finger protein 207	Multiple_Complex	36.34	5.76e-07	7.99e-05			T
TC0200003017.mm.1	4.19	T	Nebl	nebulette	Multiple_Complex	36.31	7.75e-05	0.0031	Cassette Exon	0.26	T
TC0800002811.mm.1	1.1	T	B3gnt9	UDP-GlcNAc:betaGal beta-1,3-N-acetylglucosaminyltransferase 9	Coding	36.27	4.06e-08	1.19e-05	Alternative 5' Donor Site	0.27	T
TC0400003094.mm.1	1.09	T	Cyp2j11	cytochrome P450, family 2, subfamily j, polypeptide 11	Coding	36.22	1.88e-05	0.0011			T
TC0X00003301.mm.1	2.57	T	Reps2	RALBP1 associated Eps domain containing protein 2	Multiple_Complex	36.17	0.0008	0.0171			T
TC0600001596.mm.1	-17.96	T	1190002F15Rik	RIKEN cDNA 1190002F15 gene; RIKEN cDNA 1190002F15 gene (1190002F15Rik), transcript variant 2, non-coding RNA.; RIKEN cDNA 1190002F15 gene (1190002F15Rik), transcript variant 1, non-coding RNA.	NonCoding	36.16	1.95e-05	0.0011			T
TC0500003472.mm.1	-33.27	T	Mcm7; Mir93; Mir25	minichromosome maintenance deficient 7 (S. cerevisiae); microRNA 93; microRNA 25	Multiple_Complex	35.83	5.95e-05	0.0025			T
TC0900000720.mm.1	11.5	T	Sema7a	sema domain, immunoglobulin domain (Ig), and GPI membrane anchor, (semaphorin) 7A	Multiple_Complex	35.76	0.0002	0.0052			T
TC0400000698.mm.1	-1.23	T	Slc31a1	solute carrier family 31, member 1	Multiple_Complex	35.73	1.18e-05	0.0008			T
TC1600001254.mm.1	-44.57	T	Mcm4	minichromosome maintenance deficient 4 homolog (S. cerevisiae)	Coding	35.68	1.18e-10	2.12e-07			T
TC1100001917.mm.1	-8.34	T	Gm19826	PREDICTED: predicted gene, 19826, transcript variant 1 (Gm19826), miscRNA.; PREDICTED: predicted gene, 19826, transcript variant 2 (Gm19826), miscRNA.	NonCoding	35.68	3.7e-07	5.78e-05			T
TC0200003656.mm.1	3.76	T	Cobll1	Cobl-like 1	Multiple_Complex	35.67	7.52e-05	0.003			T
TC1100000859.mm.1	4.2	T	Gas7	growth arrest specific 7	Multiple_Complex	35.63	4.49e-06	0.0004	Alternative 3' Acceptor Site	0.31	T
TC1100003326.mm.1	42.8	T	Evi2a; Evi2b; Gm21975	ecotropic viral integration site 2a; ecotropic viral integration site 2b; predicted gene 21975	Multiple_Complex	35.53	1.86e-05	0.0011	Mutually Exclusive Exons	0.24	T
TC0X00000693.mm.1	41.32	T	Plxnb3	plexin B3	Multiple_Complex	35.51	1.11e-05	0.0007			T
TC1700000839.mm.1	9.64	T	Rcan2	regulator of calcineurin 2	Coding	35.22	8.01e-08	1.96e-05	Cassette Exon	0.31	T
TC1900000255.mm.1	-1.23	T	Lpxn	leupaxin	Multiple_Complex	35.17	8.02e-07	0.0001			T
TC1000000402.mm.1	-34.28	T	Cd24a	CD24a antigen	Coding	35.15	1.1e-10	2.04e-07			T
TC0500002252.mm.1	2.79	T	Htra3	HtrA serine peptidase 3	Multiple_Complex	35.04	4.4e-05	0.002	Alternative 5' Donor Site	0.21	T
TC0800003171.mm.1	129.57	T	Agt	angiotensinogen (serpin peptidase inhibitor, clade A, member 8); Synthetic construct Mus musculus clone IMAGE:100062769, MGC:190955 angiotensinogen (serpin peptidase inhibitor, clade A, member 8) (Agt) mRNA, encodes complete protein.	Coding	35.03	7.29e-05	0.0029			T
TC0700004086.mm.1	3.68	T	Tmem41b	transmembrane protein 41B	Multiple_Complex	35.01	0.0022	0.0357			T
TC1900001661.mm.1	1.32	T	Xpnpep1	X-prolyl aminopeptidase (aminopeptidase P) 1, soluble; X-prolyl aminopeptidase (aminopeptidase P) 1, soluble (Xpnpep1), mRNA.	Multiple_Complex	34.98	9.16e-05	0.0035			T
TC0600002756.mm.1	2.35	T	Adamts9	a disintegrin-like and metallopeptidase (reprolysin type) with thrombospondin type 1 motif, 9	Multiple_Complex	34.76	0.0002	0.0068			T
TC0100001950.mm.1	2.19	T	Ppp1r42	protein phosphatase 1, regulatory subunit 42 (Ppp1r42), transcript variant 1, mRNA.; protein phosphatase 1, regulatory subunit 42	Multiple_Complex	34.64	0.0026	0.0407			T
TC1400000119.mm.1	-4.07	T	Slc4a7	solute carrier family 4, sodium bicarbonate cotransporter, member 7; Synthetic construct Mus musculus clone IMAGE:100015785, MGC:183437 solute carrier family 4, sodium bicarbonate cotransporter, member 7 (Slc4a7) mRNA, encodes complete protein.; solute carrier family 4, sodium bicarbonate cotransporter, member 7 (Slc4a7), mRNA.	Multiple_Complex	34.31	7.3e-06	0.0005			T
TC1100002690.mm.1	-1.02	T	BC049762	cDNA sequence BC049762	Coding	34.25	4.29e-05	0.002			T
TC1100000916.mm.1	-17.6	T	Trp53	transformation related protein 53	Multiple_Complex	34.11	2.44e-06	0.0002			T
TC1900000993.mm.1	-33.46	T	Pola2	polymerase (DNA directed), alpha 2	Multiple_Complex	33.96	4.17e-08	1.21e-05	Alternative 5' Donor Site	0.24	T
TC1200000682.mm.1	7.37	T	Plekhg3	pleckstrin homology domain containing, family G (with RhoGef domain) member 3	Coding	33.91	0.0001	0.0045			T
TC1500001945.mm.1	1.13	T	Cyp2d11; Mir7684	cytochrome P450, family 2, subfamily d, polypeptide 11; microRNA 7684	Multiple_Complex	33.85	8.53e-08	2.05e-05	Cassette Exon	0.29	T
TC0100001028.mm.1	-1.1	T	Serpinb11	serine (or cysteine) peptidase inhibitor, clade B (ovalbumin), member 11	Coding	33.82	0.0005	0.0121			T
TC0300002352.mm.1	-25.5	T	Cks1b	CDC28 protein kinase 1b	Coding	33.79	1.09e-08	4.59e-06			T
TC0X00000974.mm.1	-9.52	T	Nono	non-POU-domain-containing, octamer binding protein	Multiple_Complex	33.66	5.88e-08	1.57e-05			T
TC1000002629.mm.1	1.21	T	Stab2	stabilin 2	Multiple_Complex	33.65	1.51e-07	3.05e-05	Cassette Exon	0.27	T
TC0700002057.mm.1	-2.48	T	Ap2a2	adaptor-related protein complex 2, alpha 2 subunit	Multiple_Complex	33.63	2.33e-07	4.14e-05			T
TC1600000143.mm.1	11.49	T	Shisa9	shisa family member 9; shisa homolog 9 (Xenopus laevis)	Multiple_Complex	33.62	2.42e-09	1.64e-06			T
TC1000001298.mm.1	-30.87	T	Nap1l1	nucleosome assembly protein 1-like 1	Coding	33.5	5.07e-06	0.0004			T
TC0X00003197.mm.1	7.11	T	Shroom2	shroom family member 2; Synthetic construct Homo sapiens clone IMAGE:9094541; MGC:199307 shroom family member 2 (Shroom2) gene, encodes complete protein.	Multiple_Complex	33.25	3.64e-07	5.71e-05	Cassette Exon	0.33	T
TC1600000700.mm.1	-27.28	T	C330027C09Rik	RIKEN cDNA C330027C09 gene	Multiple_Complex	33.19	6.38e-06	0.0005	Alternative 3' Acceptor Site	0.33	T
TC1600001320.mm.1	-24.69	T	Cdc45	cell division cycle 45	Coding	33.07	1.09e-11	5.49e-08	Cassette Exon	0.21	T
TC0600002903.mm.1	-17.1	T	Rad18	RAD18 E3 ubiquitin protein ligase; RAD18 homolog (S. cerevisiae)	Multiple_Complex	33	7.9e-07	0.0001			T
TC0200004396.mm.1	13.79	T	Rasgrp1	RAS guanyl releasing protein 1; RAS guanyl releasing protein 1 (Rasgrp1), mRNA.	Multiple_Complex	32.98	7.48e-05	0.003			T
TC0100000886.mm.1	2.78	T	Ramp1	receptor (calcitonin) activity modifying protein 1	Multiple_Complex	32.97	5.52e-10	6.08e-07			T
TC1600000218.mm.1	6.76	T	Aifm3	apoptosis-inducing factor, mitochondrion-associated 3	Multiple_Complex	32.97	8.27e-09	3.85e-06			T
TC0900002489.mm.1	-16.32	T	Zwilch	zwilch kinetochore protein	Multiple_Complex	32.79	3.11e-06	0.0003			T
TC0X00001682.mm.1	2.06	T	Gpm6b	glycoprotein m6b	Multiple_Complex	32.65	3.36e-05	0.0016			T
TC1500000008.mm.1	-2.03	T	Oxct1	3-oxoacid CoA transferase 1	Multiple_Complex	32.56	2.08e-05	0.0012			T
TC1100002065.mm.1	2.38	T	Fn3k	fructosamine 3 kinase	Multiple_Complex	32.34	9.24e-08	2.17e-05	Cassette Exon	0.36	T
TC0X00003323.mm.1	-1.43	T	Zrsr2	zinc finger (CCCH type), RNA binding motif and serine/arginine rich 2; Synthetic construct Mus musculus clone IMAGE:100069504, MGC:199406 zinc finger (CCCH type), RNA binding motif and serine/arginine rich 2 (Zrsr2) mRNA, encodes complete protein.	Multiple_Complex	32.3	1.58e-07	3.13e-05			T
TC1300001762.mm.1	17.72	T	Serpinb1a	serine (or cysteine) peptidase inhibitor, clade B, member 1a	Coding	32.29	6.33e-08	1.65e-05	Cassette Exon	0.21	T
TC0900001302.mm.1	-14.08	T	Topbp1	topoisomerase (DNA) II binding protein 1	Multiple_Complex	32.28	0.0022	0.0362			T
TC0900001348.mm.1	5.02	T	Abhd14b	abhydrolase domain containing 14b	Coding	32.25	1.37e-07	2.86e-05	Cassette Exon	0.26	T
TC0900001768.mm.1	1.35	T	Endod1	endonuclease domain containing 1	Coding	32.24	8.2e-09	3.83e-06	Cassette Exon	0.2	T
TC0X00003399.mm.1	-5.99	T	Sh3bgrl	SH3-binding domain glutamic acid-rich protein like	Multiple_Complex	32.2	1.45e-06	0.0002			T
TC1900000134.mm.1	-28.66	T	Rcor2	REST corepressor 2	Multiple_Complex	32.17	2.23e-07	4.02e-05	Cassette Exon	0.23	T
TC0400002876.mm.1	53.27	T	Ptprd	protein tyrosine phosphatase, receptor type, D	Multiple_Complex	32.15	0.0003	0.0079			T
TC1100004272.mm.1	285.96	T	Sept4	septin 4; septin 4 (Sept4), nuclear gene encoding mitochondrial protein, mRNA.	Multiple_Complex	32.11	1.54e-08	5.92e-06			T
TC1500001480.mm.1	4.25	T	Csmd3	CUB and Sushi multiple domains 3	Multiple_Complex	32.1	0.0001	0.004			T
TC0100003500.mm.1	-41.34	T	Nuf2	NUF2, NDC80 kinetochore complex component, homolog (S. cerevisiae)	Multiple_Complex	32.06	9.47e-09	4.23e-06	Alternative 5' Donor Site	0.25	T
TC0200002232.mm.1	-24.34	T	Gins1	GINS complex subunit 1 (Psf1 homolog)	Multiple_Complex	31.98	1.16e-06	0.0001			T
TC0600003342.mm.1	8.99	T	Eps8	epidermal growth factor receptor pathway substrate 8; epidermal growth factor receptor pathway substrate 8 (Eps8), mRNA.	Multiple_Complex	31.98	0.0006	0.0132			T
TC1500002098.mm.1	-1.04	T	Zcrb1	zinc finger CCHC-type and RNA binding motif 1	Multiple_Complex	31.96	0.0002	0.0062	Alternative 3' Acceptor Site	0.39	T
TC1900001711.mm.1	2.77	T	Ablim1	actin-binding LIM protein 1; actin-binding LIM protein 1 (Ablim1), transcript variant 2, mRNA.; actin-binding LIM protein 1 (Ablim1), transcript variant 1, mRNA.	Multiple_Complex	31.86	5.72e-05	0.0025			T
TC1300002475.mm.1	1.27	T	1700029F12Rik	RIKEN cDNA 1700029F12 gene; RIKEN cDNA 1700029F12 gene (1700029F12Rik), transcript variant 1, mRNA.	Multiple_Complex	31.83	6.64e-06	0.0005			T
TC1000001074.mm.1	-3.89	T	Nup37	nucleoporin 37	Multiple_Complex	31.69	0.0009	0.019			T
TC0700000030.mm.1	1.03	T	Pira6	paired-Ig-like receptor A6	Multiple_Complex	31.67	4.51e-05	0.0021			T
TC0700001455.mm.1	-39.69	T	Rrm1	ribonucleotide reductase M1	Coding	31.66	4.18e-10	5e-07			T
TC0300001398.mm.1	-31.86	T	H2afz	H2A histone family, member Z	Multiple_Complex	31.65	8.93e-14	3.45e-09	Alternative 3' Acceptor Site	0.36	T
TC1500001238.mm.1	1.65	T	Cdh6	cadherin 6	Coding	31.65	0.0014	0.0256			T
TC0500003477.mm.1	1.43	T	BC037034	cDNA sequence BC037034	Multiple_Complex	31.64	0.0001	0.0046	Intron Retention	0.57	T
TC0200003533.mm.1	10.04	T	Cacnb4	calcium channel, voltage-dependent, beta 4 subunit	Multiple_Complex	31.63	0.0004	0.0107			T
TC0200001620.mm.1	-29.12	T	Kif18a	kinesin family member 18A	Multiple_Complex	31.49	1.8e-09	1.34e-06	Alternative 3' Acceptor Site	0.23	T
TC0100002965.mm.1	2.44	T	Steap3	STEAP family member 3	Coding	31.45	0.0005	0.0118			T
TC0100002544.mm.1	-16.6	T	Fn1	fibronectin 1; fibronectin 1 (Fn1), mRNA.	Coding	31.45	7.91e-07	0.0001			T
TC1100001448.mm.1	1.35	T	Col1a1	collagen, type I, alpha 1	Multiple_Complex	31.36	2.65e-07	4.54e-05			T
TC0500000710.mm.1	2.1	T	Kit	kit oncogene	Multiple_Complex	31.34	0.0023	0.0375			T
TC1000001282.mm.1	-21.71	T	E2f7	E2F transcription factor 7	Multiple_Complex	31.32	5.08e-07	7.28e-05			T
TC0800002235.mm.1	-21.23	T	Neil3	nei like 3 (E. coli)	Multiple_Complex	31.24	2.46e-07	4.31e-05			T
TC1700001429.mm.1	1.83	T	Qk	quaking	Multiple_Complex	31.23	4.47e-06	0.0004			T
TC0800002674.mm.1	-34.71	T	Tox3	TOX high mobility group box family member 3	Multiple_Complex	31.21	1.06e-10	2.04e-07			T
TC0400002987.mm.1	51.01	T	Slc24a2	solute carrier family 24 (sodium/potassium/calcium exchanger), member 2	Multiple_Complex	31.21	0.0001	0.0043			T
TC1100004038.mm.1	1.03	T	Cpsf4l	cleavage and polyadenylation specific factor 4-like	Multiple_Complex	31.19	4.88e-09	2.71e-06			T
TC1200000769.mm.1	-16.18	T	Sipa1l1	signal-induced proliferation-associated 1 like 1	Multiple_Complex	31.19	2.66e-06	0.0002	Cassette Exon	0.2	T
TC1500001127.mm.1	-20.33	T	Hnrnpa1; Gm5643; Gm10052	heterogeneous nuclear ribonucleoprotein A1; predicted gene 5643 (Gm5643), non-coding RNA.; heterogeneous nuclear ribonucleoprotein A1 pseudogene; predicted pseudogene 10052 (Gm10052), non-coding RNA.; heterogeneous nuclear ribonucleoprotein A1 (Hnrnpa1), transcript variant 2, mRNA.; heterogeneous nuclear ribonucleoprotein A1 (Hnrnpa1), transcript variant 1, mRNA.	Multiple_Complex	31.18	1.75e-08	6.49e-06	Alternative 3' Acceptor Site	0.23	T
TC0900000463.mm.1	1.51	T	1700063D05Rik	RIKEN cDNA 1700063D05 gene; RIKEN cDNA 1700063D05 gene (1700063D05Rik), non-coding RNA.	NonCoding	31.16	5.09e-07	7.29e-05	Cassette Exon	0.28	T
TC0600001462.mm.1	-1.09	T	Vwf	Von Willebrand factor homolog; Von Willebrand factor homolog (Vwf), mRNA.	Multiple_Complex	31.07	2.45e-06	0.0002			T
TC1600000379.mm.1	-1.09	T	Ccdc50	coiled-coil domain containing 50; coiled-coil domain containing 50 (Ccdc50), transcript variant 1, mRNA.	Multiple_Complex	31.04	0.0003	0.0087	Cassette Exon	0.37	T
TC0200003632.mm.1	-13.9	T	Kcnh7	potassium voltage-gated channel, subfamily H (eag-related), member 7	Multiple_Complex	31.03	2.1e-07	3.84e-05			T
TC0400000386.mm.1	-1.23	T	Gm3893; 4933409K07Rik	predicted gene 3893; RIKEN cDNA 4933409K07 gene	Multiple_Complex	31.02	1.31e-06	0.0001			T
TC0800001555.mm.1	-1.11	T	Disc1	disrupted in schizophrenia 1	Multiple_Complex	30.95	6.53e-08	1.69e-05			T
TC1900000356.mm.1	20.28	T	Trpm3	transient receptor potential cation channel, subfamily M, member 3	Multiple_Complex	30.66	2.73e-07	4.64e-05	Cassette Exon	0.45	T
TC0900001153.mm.1	8.18	T	Rasgrf1	RAS protein-specific guanine nucleotide-releasing factor 1	Coding	30.39	0.0003	0.0078	Cassette Exon	0.28	T
TC0100001883.mm.1	5.38	T	A330023F24Rik; Mir29c; Mir29b-2	RIKEN cDNA A330023F24 gene; microRNA 29c; microRNA 29b-2	Multiple_Complex	30.37	1.59e-05	0.0009	Alternative 5' Donor Site	0.29	T
TC0400000328.mm.1	-1.06	T			NonCoding	30.36	1.26e-06	0.0001			T
TC1700000566.mm.1	1.25	T	Cyp4f40	cytochrome P450, family 4, subfamily f, polypeptide 40	Coding	30.18	1.13e-07	2.49e-05			T
TC0700000769.mm.1	-1	T	Klk14	kallikrein related-peptidase 14	Coding	30.14	8.73e-07	0.0001			T
TC1000001626.mm.1	6.18	T	Itga7	integrin alpha 7	Coding	30.13	3.17e-07	5.18e-05			T
TC0400000207.mm.1	-28.45	T	Mms22l	MMS22-like, DNA repair protein	Multiple_Complex	30.08	2.85e-08	9.19e-06			T
TC0500000494.mm.1	-44.34	T	Ncapg	non-SMC condensin I complex, subunit G; on-SMC condensin I complex, subunit G	Multiple_Complex	30.01	1.34e-07	2.81e-05	Alternative 5' Donor Site	0.31	T
TC0400003440.mm.1	-1.06	T	Nfyc	nuclear transcription factor-Y gamma	Multiple_Complex	29.89	0.0001	0.0039			T
TC0800002406.mm.1	1.82	T			NonCoding	29.78	1.07e-09	9.39e-07			T
TC0700003539.mm.1	5.79	T	Ntrk3	neurotrophic tyrosine kinase, receptor, type 3	Multiple_Complex	29.69	0.0003	0.009			T
TC0800001863.mm.1	-41.84	T	Ckap2	cytoskeleton associated protein 2	Coding	29.65	8.89e-10	8.34e-07	Cassette Exon	0.23	T
TC0300002237.mm.1	-23.25	T	D930015E06Rik	RIKEN cDNA D930015E06 gene	Multiple_Complex	29.59	5.52e-10	6.08e-07			T
TC0X00002177.mm.1	8.41	T	Igsf1	immunoglobulin superfamily, member 1	Multiple_Complex	29.57	7.16e-05	0.0029	Cassette Exon	0.24	T
TC1000000729.mm.1	1.54	T	Chchd10	coiled-coil-helix-coiled-coil-helix domain containing 10	Coding	29.54	6.83e-08	1.75e-05	Cassette Exon	0.27	T
TC1100004159.mm.1	3.38	T	Lgals3bp	lectin, galactoside-binding, soluble, 3 binding protein	Multiple_Complex	29.53	0.0009	0.0187			T
TC1000002364.mm.1	2.34	T			NonCoding	29.52	1.16e-07	2.54e-05			T
TC0X00001170.mm.1	-42.55	T	Gm14926	predicted gene 14926 [Source:MGI Symbol;Acc:MGI:3705617]	Pseudogene	29.41	4.23e-09	2.44e-06	Cassette Exon	0.23	T
TC0500001019.mm.1	5.98	T	Gm26703	predicted gene, 26703 [Source:MGI Symbol;Acc:MGI:5477197]	NonCoding	29.41	4.29e-07	6.47e-05	Alternative 3' Acceptor Site	0.23	T
TC1800001463.mm.1	2.73	T	Atp8b1	ATPase, class I, type 8B, member 1	Coding	29.34	2.51e-05	0.0013			T
TC0100000023.mm.1	8.38	T	St18	suppression of tumorigenicity 18	Multiple_Complex	29.33	0.0001	0.0043			T
TC0100000636.mm.1	-6.19	T	Rqcd1	rcd1 (required for cell differentiation) homolog 1 (S. pombe)	Multiple_Complex	29.32	0.0001	0.0045			T
TC1700002286.mm.1	-43.25	T	Sgol1	shugoshin-like 1 (S. pombe)	Multiple_Complex	29.25	1.03e-09	9.17e-07	Alternative 5' Donor Site	0.22	T
TC1000002655.mm.1	-30.47	T	Gas2l3	growth arrest-specific 2 like 3	Multiple_Complex	29.23	5.83e-10	6.28e-07	Intron Retention	0.36	T
TC0X00000932.mm.1	1.36	T	Yipf6	Yip1 domain family, member 6	Multiple_Complex	29.06	2.04e-09	1.45e-06			T
TC0400004013.mm.1	-33.67	T	Draxin	dorsal inhibitory axon guidance protein	Multiple_Complex	29.06	2.68e-07	4.58e-05			T
TC0800000286.mm.1	3.28	T	Plat	plasminogen activator, tissue	Coding	28.91	0.0003	0.0085			T
TC0300000928.mm.1	8.48	T	Sv2a	synaptic vesicle glycoprotein 2 a	Multiple_Complex	28.89	2.12e-09	1.49e-06			T
TC0200000211.mm.1	14.83	T	Prkcq	protein kinase C, theta	Coding	28.79	4.37e-07	6.54e-05	Cassette Exon	0.29	T
TC0X00001382.mm.1	-13.81	T	Prps1	phosphoribosyl pyrophosphate synthetase 1	Multiple_Complex	28.76	7.24e-06	0.0005	Alternative 5' Donor Site	0.28	T
TC0700001855.mm.1	-1.4	T	Rnf40	ring finger protein 40	Coding	28.73	5e-05	0.0022			T
TC0800001860.mm.1	1.86	T	Atp7b	ATPase, Cu++ transporting, beta polypeptide; Synthetic construct Mus musculus clone IMAGE:100063608, MGC:191101 ATPase, Cu++ transporting, beta polypeptide (Atp7b) mRNA, encodes complete protein.	Coding	28.6	0.0002	0.0065	Alternative 5' Donor Site	0.31	T
TC0700002981.mm.1	-1.9	T	Bcl2l12	BCL2-like 12 (proline rich)	Multiple_Complex	28.55	2.97e-07	4.93e-05			T
TC1100003997.mm.1	3.54	T	Abca8b	ATP-binding cassette, sub-family A (ABC1), member 8b	Multiple_Complex	28.53	1.79e-06	0.0002	Cassette Exon	0.28	T
TC0700001986.mm.1	4.68	T	Jakmip3	janus kinase and microtubule interacting protein 3; janus kinase and microtubule interacting protein 3 (Jakmip3), mRNA.	Multiple_Complex	28.52	3.98e-08	1.17e-05	Cassette Exon	0.27	T
TC1200001306.mm.1	-21.01	T	Ncapg2	non-SMC condensin II complex, subunit G2	Multiple_Complex	28.33	2.18e-05	0.0012			T
TC0X00001413.mm.1	-18.91	T	Pak3	p21 protein (Cdc42/Rac)-activated kinase 3	Multiple_Complex	28.3	4.87e-07	7.06e-05			T
TC1100003315.mm.1	2.73	T	Ksr1	kinase suppressor of ras 1; Synthetic construct Mus musculus clone IMAGE:100068355, MGC:195899 kinase suppressor of ras 1 (Ksr1) mRNA, encodes complete protein.	Coding	28.29	1.39e-05	0.0009			T
TC0900002305.mm.1	-4.97	T	Atm	ataxia telangiectasia mutated; ataxia telangiectasia mutated homolog (human)	Multiple_Complex	28.24	9.92e-06	0.0007	Intron Retention	0.5	T
TC1900000543.mm.1	-53.92	T	Cep55	centrosomal protein 55	Multiple_Complex	28.19	8.73e-08	2.09e-05			T
TC0800003224.mm.1	-1.79	T	Zdhhc2	zinc finger, DHHC domain containing 2	Multiple_Complex	28.13	2.81e-05	0.0014			T
TC1000001684.mm.1	49.6	T	Syne1	spectrin repeat containing, nuclear envelope 1	Multiple_Complex	28.12	7.27e-07	9.45e-05			T
TC1700000836.mm.1	-15.97	T	Cyp39a1	cytochrome P450, family 39, subfamily a, polypeptide 1; cytochrome P450, family 39, subfamily a, polypeptide 1 (Cyp39a1), mRNA.	Coding	28.07	1.91e-05	0.0011			T
TC0900001226.mm.1	1	T			NonCoding	28.03	1.15e-05	0.0007			T
TC1900000081.mm.1	-1.16	T	Gm16538; RP24-179M18.3	predicted gene 16538 [Source:MGI Symbol;Acc:MGI:4414958]; novel transcript	NonCoding	27.88	1.68e-08	6.26e-06			T
TC1300000980.mm.1	2	T	2810049E08Rik	RIKEN cDNA 2810049E08 gene; RIKEN cDNA 2810049E08 gene (2810049E08Rik), non-coding RNA.	NonCoding	27.88	0.0006	0.0141			T
TC0300002242.mm.1	-1.37	T	Trim2	tripartite motif-containing 2	Multiple_Complex	27.85	5.99e-08	1.59e-05			T
TC0700003608.mm.1	5.88	T	Cpeb1	cytoplasmic polyadenylation element binding protein 1	Multiple_Complex	27.82	3.42e-05	0.0017			T
TC0200005072.mm.1	5.76	T	Ptprt	protein tyrosine phosphatase, receptor type, T; Synthetic construct Mus musculus clone IMAGE:100069486, MGC:199388 protein tyrosine phosphatase, receptor type, T (Ptprt) mRNA, encodes complete protein.	Multiple_Complex	27.76	7.81e-07	9.96e-05	Cassette Exon	0.34	T
TC1100003470.mm.1	-48.46	T	Prr11	proline rich 11	Coding	27.74	1.74e-07	3.37e-05	Alternative 5' Donor Site	0.23	T
TC1800000179.mm.1	4.35	T	Dtna	dystrobrevin alpha; dystrobrevin alpha (Dtna), transcript variant 1, mRNA.	Multiple_Complex	27.66	0.0003	0.009			T
TC1500000278.mm.1	-1.11	T	Grhl2	grainyhead-like 2 (Drosophila)	Multiple_Complex	27.65	1.73e-09	1.31e-06			T
TC1200001236.mm.1	1.44	T	Exoc3l4	exocyst complex component 3-like 4; exocyst complex component 3-like 4 (Exoc3l4), mRNA.	Coding	27.58	4.97e-05	0.0022			T
TC0800000937.mm.1	-29.65	T	Asf1b	anti-silencing function 1B histone chaperone; ASF1 anti-silencing function 1 homolog B (S. cerevisiae)	Multiple_Complex	27.5	7.91e-07	0.0001	Alternative 3' Acceptor Site	0.22	T
TC1000000493.mm.1	4.04	T	Gja1	gap junction protein, alpha 1	Multiple_Complex	27.48	4.68e-07	6.88e-05	Cassette Exon	0.5	T
TC1700000602.mm.1	1.57	T	Rgl2	ral guanine nucleotide dissociation stimulator-like 2	Multiple_Complex	27.45	8.9e-08	2.12e-05			T
TC1800000052.mm.1	-1.48	T	Wac	WW domain containing adaptor with coiled-coil	Multiple_Complex	27.43	0.0009	0.0185			T
TC1800000797.mm.1	-4.15	T	Rpl17	ribosomal protein L17	Coding	27.42	3.47e-06	0.0003			T
TC1000002689.mm.1	-1.23	T	Cfap54	cilia and flagella associated protein 54	Multiple_Complex	27.35	2.56e-05	0.0013			T
TC1000001228.mm.1	2.03	T	Mgat4c	MGAT4 family, member C; mannosyl (alpha-1,3-)-glycoprotein beta-1,4-N-acetylglucosaminyltransferase, isozyme C (putative)	Multiple_Complex	27.32	3.97e-05	0.0019			T
TC0700001451.mm.1	4.91	T	Stim1	stromal interaction molecule 1	Multiple_Complex	27.32	0.0004	0.0113	Cassette Exon	0.26	T
TC0200000461.mm.1	-1	T	Adamts13	a disintegrin-like and metallopeptidase (reprolysin type) with thrombospondin type 1 motif, 13; Synthetic construct Mus musculus clone IMAGE:100062198, MGC:190410 a disintegrin-like and metallopeptidase (reprolysin type) with thrombospondin type 1 motif, 13 (Adamts13) mRNA, encodes complete protein.	Multiple_Complex	27.25	1.4e-05	0.0009			T
TC1600000264.mm.1	-30.57	T	B3gnt5	UDP-GlcNAc:betaGal beta-1,3-N-acetylglucosaminyltransferase 5	Multiple_Complex	27.25	6.76e-10	6.94e-07			T
TC0700000009.mm.1	1.54	T	Cacng8	calcium channel, voltage-dependent, gamma subunit 8	Multiple_Complex	27.24	1.88e-07	3.57e-05	Alternative 5' Donor Site	0.39	T
TC0200002026.mm.1	1.98	T	Prnd; Prnp; Prn; PRND	prion protein dublet; prion protein; prion protein gene complex; prion protein (Prnp), mRNA.; prion protein gene complex (Prn), transcript variant 1, mRNA	Multiple_Complex	27.21	1.05e-08	4.48e-06	Cassette Exon	0.27	T
TC0200005385.mm.1	5.11	T	Sycp2	synaptonemal complex protein 2; Synthetic construct Mus musculus clone IMAGE:100069462, MGC:199364 synaptonemal complex protein 2 (Sycp2) mRNA, encodes complete protein.	Multiple_Complex	27.21	9.74e-06	0.0007	Cassette Exon	0.25	T
TC1300001556.mm.1	-51.79	T	Hist1h2aj	histone cluster 1, H2aj	Multiple_Complex	27.1	2.95e-05	0.0015			T
TC0400000018.mm.1	1.49	T	Chchd7	coiled-coil-helix-coiled-coil-helix domain containing 7; coiled-coil-helix-coiled-coil-helix domain containing 7 (Chchd7), transcript variant 1, mRNA.	Multiple_Complex	27.06	0.0002	0.0061	Alternative 5' Donor Site	0.21	T
TC1100003144.mm.1	1.4	T	Smtnl2	smoothelin-like 2	Multiple_Complex	27	7.04e-05	0.0029			T
TC0400001413.mm.1	1.01	T	Rragc	Ras-related GTP binding C	Multiple_Complex	26.9	0.0002	0.0056	Alternative 3' Acceptor Site	0.24	T
TC0600003474.mm.1	-18.56	T	Fam60a	family with sequence similarity 60, member A	Multiple_Complex	26.89	2.89e-05	0.0015			T
TC0X00003116.mm.1	-18.05	T	Dcx	doublecortin	Multiple_Complex	26.84	1.12e-07	2.47e-05			T
TC1800000934.mm.1	1.12	T	Gm26682	predicted gene, 26682 [Source:MGI Symbol;Acc:MGI:5477176]	NonCoding	26.76	0.0019	0.0324			T
TC0200005468.mm.1	-8.73	T	Nup188	nucleoporin 188	Multiple_Complex	26.76	4.46e-08	1.27e-05			T
TC0X00001787.mm.1	-1.56	T	Hdac6	histone deacetylase 6	Multiple_Complex	26.59	0.0003	0.0076			T
TC1500000031.mm.1	3.55	T	Dab2	disabled 2, mitogen-responsive phosphoprotein	Multiple_Complex	26.59	0.0009	0.0183			T
TC0600003314.mm.1	2.36	T	Hebp1	heme binding protein 1	Coding	26.58	0.0005	0.0118			T
TC0400000085.mm.1	-22.92	T	Ccne2	cyclin E2	Multiple_Complex	26.55	4.11e-06	0.0003	Alternative 5' Donor Site	0.33	T
TC1500001568.mm.1	-22.97	T	Atad2	ATPase family, AAA domain containing 2	Multiple_Complex	26.35	2.21e-07	3.99e-05			T
TC1600001946.mm.1	-1.04	T	Tmprss15	transmembrane protease, serine 15; transmembrane protease, serine 15 (Tmprss15), transcript variant 2, mRNA.	Coding	26.32	7.56e-05	0.003			T
TC0200001355.mm.1	1.49	T	Agbl2	ATP/GTP binding protein-like 2; Synthetic construct Mus musculus clone IMAGE:100064043, MGC:193414 Agbl2 protein (Agbl2) mRNA, encodes complete protein.	Multiple_Complex	26.29	0.0031	0.0462			T
TC0100003216.mm.1	1.5	T			NonCoding	26.27	1.24e-06	0.0001			T
TC0800000955.mm.1	1.45	T	Cacna1a	calcium channel, voltage-dependent, P/Q type, alpha 1A subunit	Multiple_Complex	26.22	0.0007	0.0158			T
TC1400002101.mm.1	1.22	T	Cideb	cell death-inducing DNA fragmentation factor, alpha subunit-like effector B	Multiple_Complex	26.15	3.17e-09	1.97e-06			T
TC1100000608.mm.1	2.25	T	Sept8	septin 8	Multiple_Complex	26.12	1.65e-06	0.0002			T
TC0500000360.mm.1	-28.47	T	Tacc3	transforming, acidic coiled-coil containing protein 3	Multiple_Complex	26.09	0.0004	0.0113			T
TC0500000176.mm.1	-1.99	T	Pmpcb	peptidase (mitochondrial processing) beta	Multiple_Complex	26.09	0.0021	0.0343			T
TC0X00002631.mm.1	-17.65	T	Pola1	polymerase (DNA directed), alpha 1	Multiple_Complex	26.05	1.37e-06	0.0002			T
TC0500000838.mm.1	-1.32	T			NonCoding	25.98	5.68e-07	7.91e-05			T
TC0300003010.mm.1	-18.66	T	Gm19693	PREDICTED: predicted gene, 19693, transcript variant 1 (Gm19693), miscRNA.	NonCoding	25.97	0.0003	0.0087			T
TC1900001097.mm.1	80.79	T	Myrf	myelin regulatory factor	Coding	25.92	1.32e-05	0.0008	Cassette Exon	0.31	T
TC0900000751.mm.1	-1.59	T	Pkm	pyruvate kinase, muscle	Multiple_Complex	25.91	4.49e-06	0.0004	Alternative 3' Acceptor Site	0.24	T
TC0900001100.mm.1	1.41	T	Gm2109	predicted gene 2109; predicted gene 2109 (Gm2109), non-coding RNA.	NonCoding	25.87	4.99e-08	1.39e-05	Cassette Exon	0.27	T
TC0500003051.mm.1	-17.86	T	Coro1c	coronin, actin binding protein 1C	Multiple_Complex	25.81	0.0027	0.0414	Alternative 3' Acceptor Site	0.23	T
TC1500001379.mm.1	-19.56	T	Pabpc1	poly(A) binding protein, cytoplasmic 1	Multiple_Complex	25.8	8.36e-06	0.0006			T
TC1600000368.mm.1	1.35	T	Trp63	transformation related protein 63	Multiple_Complex	25.77	0.0001	0.0042			T
TC0100002562.mm.1	-15.67	T	Igfbp5	insulin-like growth factor binding protein 5	Multiple_Complex	25.77	0.0002	0.0071			T
TC1200001110.mm.1	-3.29	T	Evl	Ena-vasodilator stimulated phosphoprotein	Multiple_Complex	25.76	0.0025	0.0392			T
TC0600001335.mm.1	1.64	T	Cacna2d4	calcium channel, voltage-dependent, alpha 2/delta subunit 4	Coding	25.72	4.12e-05	0.0019			T
TC0400000506.mm.1	-11.86	T	Anp32b	acidic (leucine-rich) nuclear phosphoprotein 32 family, member B	Multiple_Complex	25.7	2.71e-05	0.0014			T
TC0800000328.mm.1	-1.15	T	Plpp5	phospholipid phosphatase 5	Multiple_Complex	25.67	3.45e-06	0.0003			T
TC0300002912.mm.1	4.87	T	Alpk1	alpha-kinase 1	Multiple_Complex	25.62	3.41e-06	0.0003	Cassette Exon	0.27	T
TC0500003112.mm.1	1.59	T	Ccdc60	coiled-coil domain containing 60	Coding	25.59	0.0011	0.0221			T
TC0400001217.mm.1	-1.07	T	Pdzk1ip1	PDZK1 interacting protein 1	Multiple_Complex	25.57	0.0007	0.0165			T
TC0100002950.mm.1	-3.61	T	Epb41l5	erythrocyte membrane protein band 4.1 like 5	Multiple_Complex	25.54	2.49e-05	0.0013			T
TC0300000729.mm.1	-32.12	T	Mex3a	mex3 homolog A (C. elegans)	Multiple_Complex	25.52	8.72e-10	8.29e-07	Cassette Exon	0.23	T
TC1600001092.mm.1	1.26	T	Mx2	MX dynamin-like GTPase 2; myxovirus (influenza virus) resistance 2	Multiple_Complex	25.51	0.0004	0.0101			T
TC1700002644.mm.1	-1.17	T	Gm19696	PREDICTED: predicted gene, 19696, transcript variant 1 (Gm19696), miscRNA.; PREDICTED: predicted gene, 19696, transcript variant 2 (Gm19696), miscRNA.; PREDICTED: predicted gene, 19696, transcript variant 3 (Gm19696), miscRNA.; PREDICTED: predicted gene, 19696, transcript variant 4 (Gm19696), miscRNA.; PREDICTED: predicted gene, 19696, transcript variant 5 (Gm19696), miscRNA.; PREDICTED: predicte…	NonCoding	25.5	3.3e-06	0.0003			T
TC0700004657.mm.1	-1.39	T	Sec11a	SEC11 homolog A, signal peptidase complex subunit; SEC11 homolog A (S. cerevisiae)	Multiple_Complex	25.45	0.0003	0.0077	Cassette Exon	0.53	T
TC0500002580.mm.1	1.17	T	Tec	tec protein tyrosine kinase; cytoplasmic tyrosine kinase, Dscr28C related (Drosophila); tec protein tyrosine kinase (Tec), transcript variant 2, mRNA.; tec protein tyrosine kinase (Tec), transcript variant 3, mRNA.	Multiple_Complex	25.45	0.0002	0.0061			T
TC0700002426.mm.1	-17.83	T	Sae1	SUMO1 activating enzyme subunit 1; SUMO1 activating enzyme subunit 1 (Sae1), mRNA.	Coding	25.35	2.49e-08	8.38e-06			T
TC0900001101.mm.1	-34.72	T	Ttk	Ttk protein kinase	Multiple_Complex	25.29	0.0001	0.0049			T
TC1100000605.mm.1	2.79	T	Shroom1	shroom family member 1	Multiple_Complex	25.29	1.02e-07	2.32e-05	Intron Retention	0.24	T
TC0100003382.mm.1	20.29	T	Dnm3	dynamin 3	Multiple_Complex	25.25	2.87e-05	0.0015			T
TC1300001627.mm.1	-29.27	T	Gm19658	PREDICTED: predicted gene, 19658 (Gm19658), miscRNA.	NonCoding	25.24	0.0009	0.0191			T
TC0300000308.mm.1	-19.41	T	Plk4	polo-like kinase 4	Multiple_Complex	25.23	0.0003	0.0084			T
TC0500002344.mm.1	4.05	T	Fam184b	family with sequence similarity 184, member B	Multiple_Complex	25.2	0.0014	0.0259	Cassette Exon	0.23	T
TC0100003104.mm.1	6.37	T	Adora1	adenosine A1 receptor	Coding	25.2	2.78e-06	0.0003			T
TC0400002638.mm.1	1.11	T	Aldob	aldolase B, fructose-bisphosphate	Multiple_Complex	25.16	2.39e-06	0.0002			T
TC1300000191.mm.1	-14.15	T	Hist1h2bk	histone cluster 1, H2bk	Coding	25.07	2.75e-07	4.67e-05	Alternative 3' Acceptor Site	0.23	T
TC1500000736.mm.1	-1.97	T	Xrcc6	X-ray repair complementing defective repair in Chinese hamster cells 6	Multiple_Complex	25.04	0.0002	0.0056			T
TC1500000165.mm.1	3.15	T	Fam134b	family with sequence similarity 134, member B; family with sequence similarity 134, member B (Fam134b), transcript variant 1, mRNA.	Coding	25.03	2.69e-05	0.0014			T
TC1500002109.mm.1	2.29	T	Adamts20	a disintegrin-like and metallopeptidase (reprolysin type) with thrombospondin type 1 motif, 20	Multiple_Complex	25.03	1.73e-07	3.35e-05	Cassette Exon	0.27	T
TC1400000501.mm.1	-33.21	T	Cdkn3	cyclin-dependent kinase inhibitor 3	Coding	25.02	2.06e-07	3.79e-05	Cassette Exon	0.23	T
TC0300002895.mm.1	82.14	T	Ugt8a	UDP galactosyltransferase 8A	Coding	25	9.23e-05	0.0035			T
TC0700000573.mm.1	-1.11	T	Atp4a	ATPase, H+/K+ exchanging, gastric, alpha polypeptide	Multiple_Complex	24.98	2.32e-05	0.0013			T
TC1000002175.mm.1	2.29	T	Man1a	mannosidase 1, alpha	Multiple_Complex	24.96	0.0022	0.0358	Cassette Exon	0.25	T
TC0300002310.mm.1	-45.13	T	Pmf1	polyamine-modulated factor 1	Coding	24.95	3.38e-07	5.41e-05			T
TC0200002439.mm.1	50.02	T	Ppp1r16b	protein phosphatase 1, regulatory (inhibitor) subunit 16B	Multiple_Complex	24.95	7.59e-06	0.0005			T
TC0400003275.mm.1	-15.59	T	Elavl4	ELAV (embryonic lethal, abnormal vision, Drosophila)-like 4 (Hu antigen D)	Multiple_Complex	24.95	0.0004	0.0106			T
TC0600002802.mm.1	1.41	T	Frmd4b	FERM domain containing 4B	Multiple_Complex	24.91	1.6e-05	0.001			T
TC0700004310.mm.1	-72.89	T	Kif22	kinesin family member 22	Coding	24.9	4.75e-08	1.34e-05	Cassette Exon	0.23	T
TC0100003350.mm.1	-1.07	T	Tnn	tenascin N	Coding	24.89	3.58e-05	0.0017			T
TC0200003447.mm.1	4.08	T	Lrp1b	low density lipoprotein-related protein 1B (deleted in tumors)	Multiple_Complex	24.87	2.51e-05	0.0013	Cassette Exon	0.26	T
TC1300002075.mm.1	-1.55	T	H2afy	H2A histone family, member Y	Multiple_Complex	24.84	6.66e-06	0.0005			T
TC0200001345.mm.1	-1.09	T	Gm13768	predicted gene 13768 [Source:MGI Symbol;Acc:MGI:3651239]	Pseudogene	24.78	6.76e-08	1.73e-05			T
TC1500001863.mm.1	29.95	T	Sox10	SRY (sex determining region Y)-box 10; SRY-box containing gene 10	Multiple_Complex	24.75	1.29e-09	1.06e-06			T
TC1100004303.mm.1	2.86	T	Sirt7; Mir6936	sirtuin 7; microRNA 6936	Multiple_Complex	24.75	5.75e-06	0.0004	Alternative 5' Donor Site	0.22	T
TC0800002558.mm.1	5.3	T	Adgre5; Mir1668	adhesion G protein-coupled receptor E5; microRNA 1668	Multiple_Complex	24.73	0.0013	0.0243			T
TC0500000307.mm.1	-8.77	T	Cad; Mir6369	carbamoyl-phosphate synthetase 2, aspartate transcarbamylase, and dihydroorotase; microRNA mir-6369 (Mir6369), microRNA.	Multiple_Complex	24.71	2.98e-05	0.0015			T
TC0200003607.mm.1	3.85	T	Rbms1	RNA binding motif, single stranded interacting protein 1	Multiple_Complex	24.71	7.14e-05	0.0029	Cassette Exon	0.24	T
TC0900001851.mm.1	-24.83	T	Dnmt1	DNA methyltransferase (cytosine-5) 1	Coding	24.69	1.08e-10	2.04e-07			T
TC1300000192.mm.1	-30.32	T	Hist1h2bj	histone cluster 1, H2bj	Coding	24.68	3.59e-08	1.09e-05	Alternative 5' Donor Site	0.23	T
TC0500003012.mm.1	-10.7	T	Miat	myocardial infarction associated transcript (non-protein coding)	NonCoding	24.66	0.0005	0.0128			T
TC1300001908.mm.1	-1.07	T			NonCoding	24.65	1.53e-07	3.08e-05			T
TC0500000138.mm.1	1.96	T	Magi2	membrane associated guanylate kinase, WW and PDZ domain containing 2	Multiple_Complex	24.62	1.78e-05	0.001	Cassette Exon	0.43	T
TC1700001622.mm.1	-20.69	T	Ccnf; Mir5134	cyclin F; microRNA 5134	Multiple_Complex	24.61	2.07e-07	3.81e-05			T
TC1100002397.mm.1	-1.14	T	Vrk2	vaccinia related kinase 2	Multiple_Complex	24.59	3.56e-05	0.0017			T
TC1900001685.mm.1	-1.1	T			NonCoding	24.57	0.0004	0.0099			T
TC0300001289.mm.1	-15.4	T	Zgrf1	zinc finger, GRF-type containing 1	Multiple_Complex	24.54	0.0009	0.0196			T
TC0500000349.mm.1	-5.18	T	Ywhah	tyrosine 3-monooxygenase/tryptophan 5-monooxygenase activation protein, eta polypeptide	Multiple_Complex	24.5	2.58e-05	0.0014			T
TC0400000091.mm.1	-17.34	T	Rad54b; Fsbp	RAD54 homolog B (S. cerevisiae); fibrinogen silencer binding protein	Multiple_Complex	24.48	6.51e-08	1.69e-05			T
TC1600000752.mm.1	1.21	T			NonCoding	24.46	1.66e-08	6.23e-06			T
TC1700001648.mm.1	-29.73	T	Hn1l	hematological and neurological expressed 1-like	Coding	24.46	6.31e-07	8.52e-05			T
TC0500001512.mm.1	-5.43	T	Cct6a; Snora15	chaperonin containing Tcp1, subunit 6a (zeta); small nucleolar RNA, H/ACA box 15; chaperonin containing Tcp1, subunit 6a (zeta) (Cct6a), mRNA.	Multiple_Complex	24.42	0.0008	0.0174			T
TC1000000605.mm.1	2.16	T	Ctnna3	catenin (cadherin associated protein), alpha 3	Multiple_Complex	24.36	0.0005	0.0128			T
TC1100003808.mm.1	-6.62	T	Brca1	breast cancer 1, early onset; breast cancer 1	Multiple_Complex	24.35	0.0009	0.0181			T
TC1300001171.mm.1	-14.94	T	Cenpk	centromere protein K; Synthetic construct Mus musculus clone IMAGE:100015025, MGC:180340 centromere protein K (Cenpk) mRNA, encodes complete protein.; centromere protein K (Cenpk), transcript variant 2, mRNA.; centromere protein K (Cenpk), transcript variant 1, mRNA.	Multiple_Complex	24.31	1.69e-09	1.28e-06			T
TC0200001627.mm.1	11.99	T	Lgr4	leucine-rich repeat-containing G protein-coupled receptor 4; Synthetic construct Mus musculus clone IMAGE:100064037, MGC:193408 leucine-rich repeat-containing G protein-coupled receptor 4 (Lgr4) mRNA, encodes complete protein.	Multiple_Complex	24.29	0.002	0.0331			T
TC0400003887.mm.1	4.32	T	Slc25a34	solute carrier family 25, member 34	Coding	24.26	1.95e-10	2.98e-07	Cassette Exon	0.23	T
TC0700003826.mm.1	1.4	T	Relt	RELT tumor necrosis factor receptor	Coding	24.2	0.0013	0.0246			T
TC0600002722.mm.1	-15	T	Nup210	nucleoporin 210	Multiple_Complex	24.19	1.33e-08	5.31e-06			T
TC0100000224.mm.1	-1.04	T	Ptpn18	protein tyrosine phosphatase, non-receptor type 18; protein tyrosine phosphatase, non-receptor type 18 (Ptpn18), mRNA.	Coding	24.17	0.0031	0.0459			T
TC0600002381.mm.1	1.77	T	Fam13a	family with sequence similarity 13, member A	Multiple_Complex	24.16	0.0001	0.005	Cassette Exon	0.34	T
TC1100001705.mm.1	1.6	T	Acbd4	acyl-Coenzyme A binding domain containing 4	Multiple_Complex	24.14	2.44e-05	0.0013			T
TC1900001490.mm.1	-20.03	T	Aldh18a1	aldehyde dehydrogenase 18 family, member A1	Multiple_Complex	24.13	1.17e-05	0.0007			T
TC0400003738.mm.1	1.44	T	Extl1	exostoses (multiple)-like 1	Multiple_Complex	23.99	1.04e-09	9.19e-07	Cassette Exon	0.36	T
TC1700001458.mm.1	3.69	T	Acat3	acetyl-Coenzyme A acetyltransferase 3	Multiple_Complex	23.94	1.09e-07	2.43e-05	Alternative 5' Donor Site	0.23	T
TC0200000897.mm.1	2.12	T	Tanc1	tetratricopeptide repeat, ankyrin repeat and coiled-coil containing 1	Multiple_Complex	23.94	0.0002	0.0055	Cassette Exon	0.23	T
TC0400001783.mm.1	6.57	T	Arhgef19	Rho guanine nucleotide exchange factor (GEF) 19	Multiple_Complex	23.91	5.98e-09	3.13e-06	Alternative 3' Acceptor Site	0.25	T
TC0200004791.mm.1	1.77	T	Nkx2-2	NK2 homeobox 2	Multiple_Complex	23.89	2.61e-08	8.63e-06	Alternative 5' Donor Site	0.25	T
TC0800002715.mm.1	2.93	T			NonCoding	23.89	2.51e-07	4.37e-05			T
TC1400001676.mm.1	2.47	T	Sh3bp5	SH3-domain binding protein 5 (BTK-associated)	Multiple_Complex	23.88	8.13e-07	0.0001	Cassette Exon	0.27	T
TC0200000438.mm.1	5.28	T	Kcnt1	potassium channel, subfamily T, member 1; Synthetic construct Homo sapiens clone IMAGE:9094540; MGC:199306 potassium channel, subfamily T, member 1 (Kcnt1) gene, encodes complete protein.	Multiple_Complex	23.86	2.61e-07	4.49e-05			T
TC1400001902.mm.1	10.99	T	Fermt2	fermitin family homolog 2 (Drosophila)	Multiple_Complex	23.82	9.81e-06	0.0007			T
TC0900000819.mm.1	-17.3	T	Tipin	timeless interacting protein	Coding	23.79	2.28e-06	0.0002			T
TC0300001431.mm.1	4.02	T	Unc5c	unc-5 homolog C (C. elegans)	Multiple_Complex	23.7	1.22e-06	0.0001	Cassette Exon	0.28	T
TC0400002587.mm.1	-4.18	T	Igfbpl1	insulin-like growth factor binding protein-like 1	Multiple_Complex	23.69	3.63e-07	5.71e-05			T
TC0600000570.mm.1	5.73	T	Tmem176a	transmembrane protein 176A	Coding	23.68	5.26e-07	7.48e-05			T
TC0100001092.mm.1	11.89	T	Celrr	cerebellum expressed regulatory RNA	NonCoding	23.64	6.5e-06	0.0005			T
TC1600000959.mm.1	1.12	T	2810407A14Rik	RIKEN cDNA 2810407A14 gene	Multiple_Complex	23.64	0.0006	0.0146			T
TC0600002462.mm.1	1.06	T	Smyd1	SET and MYND domain containing 1	Multiple_Complex	23.62	2.49e-05	0.0013			T
TC0X00002853.mm.1	-7.16	T	Hmgn5	high-mobility group nucleosome binding domain 5	Coding	23.61	1.88e-05	0.0011			T
TC1500002250.mm.1	10.59	T	Galnt6	UDP-N-acetyl-alpha-D-galactosamine:polypeptide N-acetylgalactosaminyltransferase 6	Coding	23.55	3.81e-07	5.89e-05			T
TC1700001132.mm.1	-2.2	T	Lpin2	lipin 2	Multiple_Complex	23.54	9.75e-07	0.0001			T
TC1000001894.mm.1	15.54	T	Enpp1	ectonucleotide pyrophosphatase/phosphodiesterase 1; Synthetic construct Mus musculus clone IMAGE:100064115, MGC:193486 ectonucleotide pyrophosphatase/phosphodiesterase 1 (Enpp1) mRNA, encodes complete protein.	Multiple_Complex	23.52	5.66e-05	0.0024			T
TC0900000569.mm.1	26.64	T	2900052N01Rik	RIKEN cDNA 2900052N01 gene; RIKEN cDNA 2900052N01 gene (2900052N01Rik), non-coding RNA.	NonCoding	23.48	6.73e-05	0.0028			T
TC0500003329.mm.1	-1.74	T	Auts2	autism susceptibility candidate 2	Multiple_Complex	23.47	0.0002	0.0052			T
TC1100003353.mm.1	1.32	T	Asic2	acid-sensing (proton-gated) ion channel 2	Coding	23.44	0.0032	0.0464			T
TC1100001666.mm.1	-22.4	T	Gm24950	predicted gene, 24950 [Source:MGI Symbol;Acc:MGI:5454727]	Multiple_Complex	23.44	1.27e-05	0.0008	Alternative 3' Acceptor Site	0.23	T
TC1000002671.mm.1	-16.09	T	Tmpo	thymopoietin; thymopoietin (Tmpo), transcript variant 3, mRNA.; thymopoietin (Tmpo), transcript variant 6, mRNA.; thymopoietin (Tmpo), transcript variant 1, mRNA.	Multiple_Complex	23.4	1.86e-07	3.54e-05			T
TC0X00003398.mm.1	-1.08	T	Tsix	X (inactive)-specific transcript, opposite strand; X (inactive)-specific transcript, antisense	NonCoding	23.4	2.51e-05	0.0013			T
TC0400000716.mm.1	1.06	T	Col27a1	collagen, type XXVII, alpha 1	Multiple_Complex	23.36	1.18e-05	0.0008			T
TC1100002224.mm.1	-12.65	T	Fignl1	fidgetin-like 1	Multiple_Complex	23.31	1.39e-05	0.0009	Cassette Exon	0.23	T
TC1100003863.mm.1	1.11	T	Plcd3	phospholipase C, delta 3	Multiple_Complex	23.3	4.97e-05	0.0022	Cassette Exon	0.22	T
TC1600001479.mm.1	1158.09	T	Apod	apolipoprotein D	Multiple_Complex	23.21	0.0016	0.0287			T
TC1900000990.mm.1	-1.16	T	Dpf2	D4, zinc and double PHD fingers family 2	Multiple_Complex	23.21	8.59e-06	0.0006	Cassette Exon	0.63	T
TC0200001551.mm.1	1.8	T	Cd59b	CD59b antigen	Coding	23.09	0.0019	0.0318			T
TC0200004940.mm.1	2.08	T	Snta1	syntrophin, acidic 1	Multiple_Complex	23.08	1.2e-05	0.0008	Alternative 5' Donor Site	0.31	T
TC0200002857.mm.1	-1.28	T	1700080N15Rik	RIKEN cDNA 1700080N15 gene	NonCoding	23.08	8.08e-06	0.0006			T
TC0300003247.mm.1	5.42	T	Amy1	amylase 1, salivary	Multiple_Complex	23.07	0.0014	0.0263			T
TC0600001171.mm.1	2.46	T	Chl1	cell adhesion molecule with homology to L1CAM	Multiple_Complex	23.01	9.78e-08	2.26e-05			T
TC0300002344.mm.1	4.57	T	Efna1	ephrin A1	Coding	22.99	2.15e-05	0.0012			T
TC0800001770.mm.1	1.62	T	Csmd1	CUB and Sushi multiple domains 1	Multiple_Complex	22.97	0.0021	0.0343			T
TC1400000163.mm.1	1.85	T	Nudt13	nudix (nucleoside diphosphate linked moiety X)-type motif 13	Coding	22.92	1.22e-05	0.0008			T
TC0600001634.mm.1	1.05	T	Ptpro	protein tyrosine phosphatase, receptor type, O	Coding	22.91	4.5e-07	6.68e-05			T
TC1300002542.mm.1	-12.59	T	Cenph	centromere protein H	Multiple_Complex	22.91	4.36e-06	0.0004			T
TC0400002471.mm.1	3.29	T	Fam219a	family with sequence similarity 219, member A	Multiple_Complex	22.83	0.0011	0.0216			T
TC0900000336.mm.1	-11.16	T	Cdon	cell adhesion molecule-related/down-regulated by oncogenes	Coding	22.82	1.68e-05	0.001			T
TC0100002335.mm.1	2.42	T	Dnah7a	dynein, axonemal, heavy chain 7A	Multiple_Complex	22.7	0.0008	0.0181			T
TC0100003664.mm.1	1.94	T	Psen2	presenilin 2	Multiple_Complex	22.68	2.89e-06	0.0003			T
TC0600003136.mm.1	-31.14	T	Ncapd2	non-SMC condensin I complex, subunit D2	Coding	22.66	3.95e-05	0.0019			T
TC1600001276.mm.1	1.04	T	Ppil2	peptidylprolyl isomerase (cyclophilin)-like 2	Multiple_Complex	22.62	3.23e-05	0.0016			T
TC0600000637.mm.1	2.02	T	Creb5; 9430076C15Rik	cAMP responsive element binding protein 5; RIKEN cDNA 9430076C15 gene; RIKEN cDNA 9430076C15 gene (9430076C15Rik), non-coding RNA.	Multiple_Complex	22.61	5.13e-05	0.0023			T
TC0900001487.mm.1	-1.01	T	Trank1	tetratricopeptide repeat and ankyrin repeat containing 1	Multiple_Complex	22.6	2.09e-05	0.0012			T
TC1100001395.mm.1	2.56	T	Tmem100	transmembrane protein 100	Coding	22.59	7.8e-09	3.72e-06	Cassette Exon	0.21	T
TC0500003310.mm.1	20.37	T	Phkg1	phosphorylase kinase gamma 1	Multiple_Complex	22.55	4.33e-06	0.0004			T
TC0700001644.mm.1	15.72	T	Mical2	microtubule associated monooxygenase, calponin and LIM domain containing 2	Multiple_Complex	22.51	0.002	0.0338			T
TC0500002440.mm.1	1.21	T	4932441J04Rik	RIKEN cDNA 4932441J04 gene	NonCoding	22.49	0.0005	0.0129	Alternative 5' Donor Site	0.27	T
TC1200000775.mm.1	8.39	T	Rgs6	regulator of G-protein signaling 6	Multiple_Complex	22.49	0.001	0.0207			T
TC1100003462.mm.1	12.75	T	Ypel2	yippee-like 2 (Drosophila)	Coding	22.45	0.0033	0.048			T
TC0200005155.mm.1	1.42	T	Zmynd8	zinc finger, MYND-type containing 8; zinc finger, MYND-type containing 8 (Zmynd8), transcript variant 1, mRNA.	Multiple_Complex	22.43	2.68e-06	0.0002	Cassette Exon	0.34	T
TC0200003317.mm.1	1.72	T	Slc2a8	solute carrier family 2, (facilitated glucose transporter), member 8	Multiple_Complex	22.38	0.0006	0.0145			T
TC1100002488.mm.1	-1.39	T	Ranbp17	RAN binding protein 17; RAN binding protein 17 (Ranbp17), mRNA.	Multiple_Complex	22.37	0.0003	0.0091			T
TC1700001163.mm.1	-2.17	T	Ttc27	tetratricopeptide repeat domain 27	Coding	22.35	9.05e-09	4.09e-06			T
TC0100003836.mm.1	3.32	T	Hsd11b1	hydroxysteroid 11-beta dehydrogenase 1	Multiple_Complex	22.33	7.62e-05	0.003			T
TC1800001149.mm.1	1.14	T	Fam13b	family with sequence similarity 13, member B; family with sequence similarity 13, member B (Fam13b), mRNA.	Multiple_Complex	22.32	0.0012	0.0237			T
TC1700001634.mm.1	2.15	T	Slc9a3r2	solute carrier family 9 (sodium/hydrogen exchanger), member 3 regulator 2	Coding	22.31	0.0003	0.0078	Cassette Exon	0.26	T
TC0600001082.mm.1	2.84	T	Hdac11	histone deacetylase 11	Multiple_Complex	22.29	1.04e-05	0.0007	Cassette Exon	0.27	T
TC0100003416.mm.1	-20.6	T	BC055324	cDNA sequence BC055324	Multiple_Complex	22.27	5.97e-08	1.58e-05	Intron Retention	0.37	T
TC1900001045.mm.1	1.03	T	Rtn3	reticulon 3	Multiple_Complex	22.24	0.0015	0.0273			T
TC0100003057.mm.1	2.52	T	Ikbke	inhibitor of kappaB kinase epsilon	Multiple_Complex	22.22	0.0005	0.0131	Cassette Exon	0.32	T
TC0800003238.mm.1	-17.66	T	Trim67	tripartite motif-containing 67	Multiple_Complex	22.12	6.97e-07	9.14e-05			T
TC0900001954.mm.1	9.82	T	Ntm	neurotrimin	Multiple_Complex	22.12	2.72e-05	0.0014			T
TC1600001081.mm.1	2.37	T	B3galt5	UDP-Gal:betaGlcNAc beta 1,3-galactosyltransferase, polypeptide 5	Multiple_Complex	22.09	1.09e-06	0.0001			T
TC0800000592.mm.1	5.21	T	Gpm6a	glycoprotein m6a	Multiple_Complex	22.09	0.0009	0.0187			T
TC1700001497.mm.1	-19.23	T	Dll1	delta-like 1 (Drosophila)	Multiple_Complex	22.02	4.7e-07	6.9e-05			T
TC1400002017.mm.1	6.54	T	Ndrg2	N-myc downstream regulated gene 2	Coding	22	1.08e-06	0.0001	Cassette Exon	0.41	T
TC1500001690.mm.1	1.79	T	Ptk2	PTK2 protein tyrosine kinase 2	Multiple_Complex	21.98	0.0005	0.0117			T
TC1100000467.mm.1	1.63	T			NonCoding	21.95	7.93e-06	0.0006			T
TC0100002964.mm.1	1.32	T	Dbi	diazepam binding inhibitor	Multiple_Complex	21.94	0.0006	0.0133	Alternative 5' Donor Site	0.34	T
TC1700001262.mm.1	5.66	T	Plekhh2	pleckstrin homology domain containing, family H (with MyTH4 domain) member 2	Coding	21.93	0.002	0.0339			T
TC1200001468.mm.1	1.01	T	Atp6v1c2	ATPase, H+ transporting, lysosomal V1 subunit C2	Coding	21.92	1.21e-06	0.0001			T
TC0X00003249.mm.1	-5.09	T	Sms	spermine synthase	Multiple_Complex	21.9	3.81e-07	5.88e-05			T
TC1500002071.mm.1	-1.88	T	Kif21a	kinesin family member 21A; kinesin family member 21A (Kif21a), transcript variant 1, mRNA.	Coding	21.89	5.8e-05	0.0025			T
TC0900002254.mm.1	20.3	T	Ncam1	neural cell adhesion molecule 1	Multiple_Complex	21.87	1.44e-06	0.0002			T
TC0300002797.mm.1	8.22	T	S1pr1	sphingosine-1-phosphate receptor 1	Coding	21.84	2.79e-07	4.71e-05	Cassette Exon	0.24	T
TC0100003709.mm.1	2.47	T	Degs1	degenerative spermatocyte homolog 1 (Drosophila)	Multiple_Complex	21.83	3.27e-09	2.02e-06	Mutually Exclusive Exons	0.2	T
TC1900000890.mm.1	3.17	T	Aldh3b1	aldehyde dehydrogenase 3 family, member B1	Coding	21.78	4.21e-06	0.0003			T
TC1300002423.mm.1	1.65	T	Zfyve16	zinc finger, FYVE domain containing 16	Multiple_Complex	21.71	0.0013	0.0252			T
TC0600001867.mm.1	2.39	T	Thsd7a	thrombospondin, type I, domain containing 7A	Multiple_Complex	21.6	0.001	0.0209			T
TC1700001410.mm.1	2.42	T	4930506C21Rik	RIKEN cDNA 4930506C21 gene	NonCoding	21.6	3.47e-05	0.0017	Cassette Exon	0.23	T
TC0200002476.mm.1	1.61	T	Sgk2	serum/glucocorticoid regulated kinase 2	Multiple_Complex	21.56	1.04e-08	4.44e-06	Alternative 5' Donor Site	0.29	T
TC1500000603.mm.1	2.79	T	Kifc2	kinesin family member C2; Synthetic construct Mus musculus clone IMAGE:100062498, MGC:190894 kinesin family member C2 (Kifc2) mRNA, encodes complete protein.	Coding	21.56	0.0006	0.0133			T
TC0600001657.mm.1	-1.04	T	Aebp2	AE binding protein 2	Multiple_Complex	21.56	0.0016	0.0286			T
TC0300000712.mm.1	11.96	T	Gm19439	PREDICTED: predicted gene, 19439 (Gm19439), miscRNA.	NonCoding	21.55	1.39e-08	5.48e-06			T
TC0500003637.mm.1	-12.03	T	Slc7a1	solute carrier family 7 (cationic amino acid transporter, y+ system), member 1	Multiple_Complex	21.52	1.12e-08	4.69e-06			T
TC0200005271.mm.1	-31.18	T	Aurka	aurora kinase A	Multiple_Complex	21.51	1.57e-06	0.0002			T
TC1300002079.mm.1	22.72	T	Cxcl14	chemokine (C-X-C motif) ligand 14	Coding	21.48	1.34e-08	5.35e-06	Cassette Exon	0.23	T
TC0700000816.mm.1	-1.1	T	Vrk3	vaccinia related kinase 3	Multiple_Complex	21.47	1.98e-07	3.7e-05			T
TC1600002056.mm.1	-1.58	T	Urb1	URB1 ribosome biogenesis 1 homolog (S. cerevisiae)	Multiple_Complex	21.44	6.46e-09	3.28e-06			T
TC0700001332.mm.1	2.32	T	Tenm4	teneurin transmembrane protein 4	Multiple_Complex	21.42	0.0024	0.0387			T
TC0X00001142.mm.1	21.39	T	Klhl4	kelch-like 4	Coding	21.35	4.64e-05	0.0021			T
TC0200001532.mm.1	-1.07	T	Elf5	E74-like factor 5	Multiple_Complex	21.33	4.85e-05	0.0022	Alternative 3' Acceptor Site	0.27	T
TC0100001498.mm.1	-1.09	T	F5	coagulation factor V; Synthetic construct Mus musculus clone IMAGE:100069458, MGC:199360 coagulation factor V (F5) mRNA, encodes complete protein.	Coding	21.26	0.0005	0.0125			T
TC1100003860.mm.1	-1.47	T	Dcakd	dephospho-CoA kinase domain containing	Multiple_Complex	21.24	0.0002	0.0062	Cassette Exon	0.28	T
TC0400001682.mm.1	-1.7	T	Zfp46	zinc finger protein 46	Multiple_Complex	21.23	0.0011	0.0217			T
TC1900000099.mm.1	-10.04	T	Cdca5	cell division cycle associated 5	Multiple_Complex	21.1	7.35e-08	1.85e-05			T
TC0100003827.mm.1	-1.33	T	Hhat	hedgehog acyltransferase	Multiple_Complex	21.04	1.37e-06	0.0002			T
TC1100001694.mm.1	1.27	T	Fzd2	frizzled homolog 2 (Drosophila)	Coding	21.03	3.12e-07	5.12e-05	Alternative 5' Donor Site	0.27	T
TC1700000702.mm.1	-15.78	T	Gm19645	PREDICTED: predicted gene, 19645 (Gm19645), miscRNA.	NonCoding	21.02	8.71e-06	0.0006	Cassette Exon	0.23	T
TC0X00000735.mm.1	-16.19	T	Dkc1	dyskeratosis congenita 1, dyskerin	Multiple_Complex	21.01	3.49e-07	5.56e-05			T
TC0X00001780.mm.1	-43.18	T	Plp2	proteolipid protein 2	Multiple_Complex	21	3.1e-05	0.0016	Alternative 5' Donor Site	0.27	T
TC0300001318.mm.1	-1.03	T	Col25a1	collagen, type XXV, alpha 1; collagen, type XXV, alpha 1 (Col25a1), transcript variant 3, mRNA.	Multiple_Complex	21	4.95e-06	0.0004			T
TC1700001686.mm.1	1.24	T	Rab11fip3	RAB11 family interacting protein 3 (class II)	Multiple_Complex	21	0.0002	0.0054	Alternative 3' Acceptor Site	0.24	T
TC0500000363.mm.1	-13.81	T	Whsc1	Wolf-Hirschhorn syndrome candidate 1 (human); Synthetic construct Mus musculus clone IMAGE:100063634, MGC:191107 Wolf-Hirschhorn syndrome candidate 1 (human) (Whsc1) mRNA, encodes complete protein.	Multiple_Complex	20.96	1.31e-07	2.77e-05			T
TC0100002576.mm.1	2.89	T	Tns1	tensin 1; tensin 1 (Tns1), mRNA.	Multiple_Complex	20.96	1.46e-05	0.0009			T
TC0800000017.mm.1	1.53	T	Stxbp2	syntaxin binding protein 2	Multiple_Complex	20.95	4.28e-05	0.002	Cassette Exon	0.28	T
TC0400001465.mm.1	-17.71	T	Clspn	claspin	Multiple_Complex	20.85	3.27e-08	1.01e-05	Alternative 3' Acceptor Site	0.26	T
TC1200002002.mm.1	-19.26	T	Erh	enhancer of rudimentary homolog (Drosophila)	Coding	20.85	6.74e-05	0.0028			T
TC0100000428.mm.1	-1.03	T	Aox3	aldehyde oxidase 3	Multiple_Complex	20.85	1.46e-06	0.0002			T
TC0400003085.mm.1	-1.03	T	Cyp2j13	cytochrome P450, family 2, subfamily j, polypeptide 13	Coding	20.81	4.85e-05	0.0022			T
TC0700002125.mm.1	2.86	T			NonCoding	20.78	2.03e-06	0.0002			T
TC0500002152.mm.1	-24.86	T	Tyms	thymidylate synthase	Multiple_Complex	20.74	1.01e-06	0.0001			T
TC1900000560.mm.1	-23.14	T	Hells	helicase, lymphoid specific	Multiple_Complex	20.73	8.66e-08	2.08e-05	Alternative 3' Acceptor Site	0.23	T
TC1100004002.mm.1	1.97	T	Abca6	ATP-binding cassette, sub-family A (ABC1), member 6	Multiple_Complex	20.72	0.0031	0.0457			T
TC0800002158.mm.1	-24.92	T	Helt	helt bHLH transcription factor	Coding	20.63	9.64e-07	0.0001			T
TC0100000836.mm.1	1.66	T	Ugt1a2; Ugt1a6a; Ugt1a6b; Ugt1a10; Ugt1a7c; Ugt1a5; Ugt1a9; Ugt1a1	UDP glucuronosyltransferase 1 family, polypeptide A2; UDP glucuronosyltransferase 1 family, polypeptide A6A; UDP glucuronosyltransferase 1 family, polypeptide A6B; UDP glycosyltransferase 1 family, polypeptide A10; UDP glucuronosyltransferase 1 family, polypeptide A7C; UDP glucuronosyltransferase 1 family, polypeptide A5; UDP glucuronosyltransferase 1 family, polypeptide A9; UDP glucuronosyltrans…	Multiple_Complex	20.63	0.001	0.0211	Cassette Exon	0.2	T
TC1500000392.mm.1	2.29	T	Deptor	DEP domain containing MTOR-interacting protein	Multiple_Complex	20.6	0.0009	0.0193	Alternative 5' Donor Site	0.27	T
TC0100003079.mm.1	86.58	T	Cntn2	contactin 2	Multiple_Complex	20.58	1.01e-05	0.0007	Cassette Exon	0.26	T
TC1900001562.mm.1	20.28	T	Scd1	stearoyl-Coenzyme A desaturase 1	Multiple_Complex	20.56	0.0002	0.0072			T
TC0500000888.mm.1	-9.72	T	Sept11	septin 11	Multiple_Complex	20.55	1.02e-06	0.0001			T
TC1600000491.mm.1	4.98	T	Adcy5	adenylate cyclase 5	Coding	20.54	2.26e-05	0.0012			T
TC0400001047.mm.1	15.23	T	Pde4b	phosphodiesterase 4B, cAMP specific	Multiple_Complex	20.47	7.08e-05	0.0029			T
TC0100003352.mm.1	3.72	T	Rabgap1l	RAB GTPase activating protein 1-like	Multiple_Complex	20.45	0.0002	0.0065			T
TC0Y00000233.mm.1	1.22	T	Uty	ubiquitously transcribed tetratricopeptide repeat gene, Y chromosome	Multiple_Complex	20.38	0.0035	0.0497			T
TC0500000107.mm.1	1.86	T	Gm21847	predicted gene, 21847 [Source:MGI Symbol;Acc:MGI:5434011]	Coding	20.38	2.84e-07	4.77e-05			T
TC0200002577.mm.1	-5.88	T	Cse1l	chromosome segregation 1-like (S. cerevisiae)	Multiple_Complex	20.37	3.63e-05	0.0017			T
TC0100000216.mm.1	8.58	T	Dst	dystonin; dystonin (Dst), transcript variant a, mRNA.	Multiple_Complex	20.36	0.0022	0.0363			T
TC0200002869.mm.1	-16.29	T	Mcm10	minichromosome maintenance deficient 10 (S. cerevisiae)	Multiple_Complex	20.34	1.97e-05	0.0011			T
TC1700000705.mm.1	-17.63	T	Mdc1	mediator of DNA damage checkpoint 1	Coding	20.3	4.43e-05	0.002			T
TC0200002757.mm.1	4.31	T	Phactr3	phosphatase and actin regulator 3	Multiple_Complex	20.28	6.64e-05	0.0027			T
TC1000001737.mm.1	1.1	T	Stxbp5	syntaxin binding protein 5 (tomosyn)	Multiple_Complex	20.26	0.0002	0.006			T
TC0700004265.mm.1	-1.11	T	Xpo6	exportin 6	Multiple_Complex	20.26	3.19e-05	0.0016			T
TC1700000528.mm.1	13.16	T	Abcg1	ATP-binding cassette, sub-family G (WHITE), member 1	Multiple_Complex	20.2	9.05e-05	0.0035			T
TC0600000007.mm.1	7.68	T	Gng11	guanine nucleotide binding protein (G protein), gamma 11	Coding	20.19	2.81e-05	0.0014			T
TC0500000199.mm.1	-6.37	T	2700038G22Rik	RIKEN cDNA 2700038G22 gene	NonCoding	20.17	2.63e-05	0.0014			T
TC1000002650.mm.1	-2.37	T	Utp20	UTP20, small subunit (SSU) processome component, homolog (yeast)	Coding	20.17	0.0007	0.0163			T
TC1300000336.mm.1	2.66	T	Dusp22	dual specificity phosphatase 22	Coding	20.16	0.0027	0.0412			T
TC0200004159.mm.1	26.37	T	Cd82	CD82 antigen	Multiple_Complex	20.16	0.0001	0.0042			T
TC0300002348.mm.1	2.54	T	Adam15	a disintegrin and metallopeptidase domain 15 (metargidin)	Multiple_Complex	20.12	0.0001	0.0047			T
TC0300001364.mm.1	-26.89	T	Cenpe	centromere protein E	Coding	20.09	4.38e-06	0.0004	Cassette Exon	0.24	T
TC0800000543.mm.1	22.69	T	Enpp6	ectonucleotide pyrophosphatase/phosphodiesterase 6	Multiple_Complex	20.08	5.56e-06	0.0004	Cassette Exon	0.23	T
TC0200003872.mm.1	-22.39	T	2700094K13Rik	RIKEN cDNA 2700094K13 gene	Multiple_Complex	20.04	5.54e-08	1.5e-05	Intron Retention	0.37	T
TC0400001286.mm.1	1.33	T	Tmem53	transmembrane protein 53	Multiple_Complex	19.98	4.71e-06	0.0004			T
TC0600001393.mm.1	1.49	T	Foxj2; Mir7231	forkhead box J2; microRNA 7231	Multiple_Complex	19.95	0.0011	0.0217	Alternative 3' Acceptor Site	0.33	T
TC0400004177.mm.1	1.96	T	Akap2	A kinase (PRKA) anchor protein 2	Multiple_Complex	19.94	0.0004	0.0102			T
TC1100000617.mm.1	1.61	T	P4ha2	procollagen-proline, 2-oxoglutarate 4-dioxygenase (proline 4-hydroxylase), alpha II polypeptide	Multiple_Complex	19.94	6.49e-05	0.0027			T
TC0400000464.mm.1	-20.42	T	Melk	maternal embryonic leucine zipper kinase	Multiple_Complex	19.93	1.99e-06	0.0002			T
TC1200000671.mm.1	-8.45	T	Syne2; Mir5101	spectrin repeat containing, nuclear envelope 2; microRNA 5101	Multiple_Complex	19.92	0.0001	0.0042			T
TC0X00000150.mm.1	-1.02	T			NonCoding	19.91	0.0001	0.0041			T
TC0X00000649.mm.1	3.02	T	Mtm1	X-linked myotubular myopathy gene 1	Multiple_Complex	19.88	0.0028	0.0424	Cassette Exon	0.29	T
TC0900001052.mm.1	-1.45	T	Ddx43	DEAD (Asp-Glu-Ala-Asp) box polypeptide 43	Coding	19.82	0.0024	0.0378			T
TC0200003289.mm.1	-1.2	T	Gm13425	predicted gene 13425	NonCoding	19.82	1.33e-05	0.0008			T
TC1200001834.mm.1	-79.4	T	Mis18bp1	MIS18 binding protein 1	Multiple_Complex	19.81	4.07e-08	1.19e-05			T
TC0500002280.mm.1	-10.3	T	Nsg1	neuron specific gene family member 1	Coding	19.78	7.76e-06	0.0006	Cassette Exon	0.23	T
TC0800000036.mm.1	-1.03	T	Cers4	ceramide synthase 4	Multiple_Complex	19.75	0.0012	0.0233			T
TC0100003102.mm.1	-24.95	T	Btg2	B cell translocation gene 2, anti-proliferative	Coding	19.74	9.89e-08	2.27e-05	Alternative 3' Acceptor Site	0.23	T
TC1100000009.mm.1	2.2	T	Pik3ip1	phosphoinositide-3-kinase interacting protein 1; phosphoinositide-3-kinase interacting protein 1 (Pik3ip1), mRNA.	Multiple_Complex	19.73	9.32e-05	0.0035			T
TC1100000039.mm.1	12.08	T	Gatsl3	GATS protein-like 3	Coding	19.7	0.0001	0.0038			T
TC1500000002.mm.1	22.29	T	Sepp1	selenoprotein P, plasma, 1	Multiple_Complex	19.65	0.0011	0.0219			T
TC0900001424.mm.1	-13.98	T	Celsr3	cadherin, EGF LAG seven-pass G-type receptor 3 (flamingo homolog, Drosophila)	Multiple_Complex	19.57	0.0002	0.0061			T
TC1300000912.mm.1	18.93	T	Ell2	elongation factor RNA polymerase II 2	Coding	19.55	0.0033	0.0482			T
TC0200000577.mm.1	-1.48	T	Ciz1	CDKN1A interacting zinc finger protein 1; CDKN1A interacting zinc finger protein	Multiple_Complex	19.5	0.0002	0.0052	Intron Retention	0.38	T
TC0300001589.mm.1	15.69	T	Wls	wntless homolog (Drosophila)	Multiple_Complex	19.5	0.0006	0.0139			T
TC0200004366.mm.1	-22.48	T	Arhgap11a	Rho GTPase activating protein 11A	Multiple_Complex	19.5	1.07e-05	0.0007			T
TC0300001096.mm.1	-1.06	T	Tmigd3; Adora3	transmembrane and immunoglobulin domain containing 3; adenosine A3 receptor	Multiple_Complex	19.5	2e-08	7.17e-06			T
TC1700000117.mm.1	30.59	T	Agpat4	1-acylglycerol-3-phosphate O-acyltransferase 4 (lysophosphatidic acid acyltransferase, delta)	Multiple_Complex	19.44	3.17e-06	0.0003			T
TC0400003210.mm.1	1.02	T			NonCoding	19.44	2.13e-07	3.89e-05			T
TC0200002077.mm.1	1.39	T	Snap25	synaptosomal-associated protein 25	Multiple_Complex	19.42	0.0017	0.0302			T
TC1400000179.mm.1	2.34	T	Adk	adenosine kinase	Multiple_Complex	19.4	0.0004	0.0098			T
TC0700004291.mm.1	2	T	Sult1a1	sulfotransferase family 1A, phenol-preferring, member 1	Coding	19.4	1.66e-06	0.0002	Cassette Exon	0.26	T
TC0600000978.mm.1	-2.41	T	Add2	adducin 2 (beta); adducin 2 (beta) (Add2), mRNA.	Multiple_Complex	19.39	2.9e-07	4.85e-05			T
TC1500001192.mm.1	-19.82	T	Skp2	S-phase kinase-associated protein 2 (p45); S-phase kinase-associated protein 2 (p45) (Skp2), transcript variant 1, mRNA.	Multiple_Complex	19.32	1.48e-07	3.02e-05			T
TC0200004217.mm.1	1.74	T	Fjx1	four jointed box 1 (Drosophila)	Coding	19.32	1.33e-06	0.0001			T
TC0600001372.mm.1	1.38	T	A2m	alpha-2-macroglobulin	Multiple_Complex	19.32	5.43e-05	0.0024			T
TC0100003478.mm.1	-14.14	T	Uck2	uridine-cytidine kinase 2	Coding	19.31	1.03e-06	0.0001			T
TC1100002659.mm.1	-7.59	T	Cnot6	CCR4-NOT transcription complex, subunit 6	Multiple_Complex	19.27	0.0018	0.0307			T
TC0400002309.mm.1	2.26	T	Klhl32	kelch-like 32	Multiple_Complex	19.22	0.0001	0.005			T
TC1500001772.mm.1	4.2	T	Oplah	5-oxoprolinase (ATP-hydrolysing)	Multiple_Complex	19.22	1.97e-05	0.0011			T
TC0800003009.mm.1	-1.02	T	Pkd1l2	polycystic kidney disease 1 like 2	Multiple_Complex	19.21	1.18e-08	4.89e-06			T
TC0200002407.mm.1	1.16	T	Rpn2	ribophorin II	Multiple_Complex	19.21	0.0013	0.0249			T
TC0200004229.mm.1	-6.7	T	Caprin1	cell cycle associated protein 1	Multiple_Complex	19.2	0.003	0.0447			T
TC0100000427.mm.1	17.35	T	Aox1	aldehyde oxidase 1	Multiple_Complex	19.19	1.58e-08	5.99e-06			T
TC1100002687.mm.1	-1.17	T	Gm12202	predicted gene 12202 [Source:MGI Symbol;Acc:MGI:3650184]	Pseudogene	19.19	1.79e-07	3.44e-05			T
TC1800000579.mm.1	3.57	T	Gm19500	PREDICTED: predicted gene, 19500 (Gm19500), miscRNA.	NonCoding	19.18	7.48e-13	1.19e-08			T
TC0300002499.mm.1	-18.32	T	Hist2h2ac	histone cluster 2, H2ac	Coding	19.13	4.23e-10	5.03e-07	Alternative 5' Donor Site	0.23	T
TC0800002390.mm.1	-1.41	T	Upf1	UPF1 regulator of nonsense transcripts homolog (yeast)	Coding	19.13	3.79e-06	0.0003			T
TC0300002593.mm.1	-5.78	T	Ttf2	transcription termination factor, RNA polymerase II	Multiple_Complex	19.11	0.0001	0.0046			T
TC1900001556.mm.1	1.37	T	Pkd2l1	polycystic kidney disease 2-like 1	Multiple_Complex	19.1	2.35e-06	0.0002	Cassette Exon	0.27	T
TC0100000608.mm.1	-1.32	T	Smarcal1	SWI/SNF related matrix associated, actin dependent regulator of chromatin, subfamily a-like 1	Multiple_Complex	19.07	0.0002	0.006	Cassette Exon	0.43	T
TC1200001861.mm.1	-17.34	T	Pole2	polymerase (DNA directed), epsilon 2 (p59 subunit)	Coding	19.05	9.5e-08	2.21e-05	Cassette Exon	0.2	T
TC1500002032.mm.1	2.71	T	Ttll8; Gm20621	tubulin tyrosine ligase-like family, member 8; predicted gene 20621	Multiple_Complex	19.02	6.52e-05	0.0027			T
TC1500000568.mm.1	1.14	T	Zfp707	zinc finger protein 707; zinc finger protein 707 (Zfp707), mRNA.	Multiple_Complex	19.01	0.0024	0.0381			T
TC1700001828.mm.1	-1.04	T			NonCoding	19.01	0.0003	0.0089			T
TC0500000298.mm.1	-17.96	T	Cenpa	centromere protein A	Multiple_Complex	19	5.15e-06	0.0004			T
TC0900002293.mm.1	1	T	Gm6981	glyceraldehyde-3-phosphate dehydrogenase pseudogene	Multiple_Complex	19	4.13e-08	1.2e-05			T
TC0700000300.mm.1	-1.16	T	Ercc2; Mir343	excision repair cross-complementing rodent repair deficiency, complementation group 2; microRNA 343	Multiple_Complex	18.95	0.0004	0.0098			T
TC0400003079.mm.1	-31.9	T	Jun	jun proto-oncogene; Jun oncogene	Coding	18.91	6.29e-10	6.63e-07	Alternative 3' Acceptor Site	0.23	T
TC1100003345.mm.1	61.39	T	Myo1d	myosin ID	Multiple_Complex	18.9	1.57e-05	0.0009			T
TC0600003016.mm.1	1.58	T	Lrtm2	leucine-rich repeats and transmembrane domains 2	Coding	18.89	9.3e-08	2.18e-05	Cassette Exon	0.27	T
TC1900000052.mm.1	-1.06	T	Brms1; B4gat1	breast cancer metastasis-suppressor 1; beta-1,4-glucuronyltransferase 1	Multiple_Complex	18.89	3.65e-08	1.1e-05	Alternative 3' Acceptor Site	0.38	T
TC0600000902.mm.1	6.17	T	Eva1a	eva-1 homolog A (C. elegans)	Multiple_Complex	18.83	2e-07	3.73e-05	Alternative 5' Donor Site	0.24	T
TC1200001961.mm.1	2.08	T			NonCoding	18.81	5.91e-08	1.57e-05			T
TC0700004626.mm.1	127.15	T	Sez6l2	seizure related 6 homolog like 2	Multiple_Complex	18.8	1.27e-06	0.0001			T
TC1700002583.mm.1	-6.03	T	Srsf7	serine/arginine-rich splicing factor 7	Multiple_Complex	18.8	7.53e-05	0.003	Intron Retention	0.43	T
TC0100000426.mm.1	-11.63	T	Sgol2a	shugoshin-like 2a (S. pombe)	Multiple_Complex	18.79	1.1e-05	0.0007			T
TC1000003220.mm.1	5.88	T	Nt5dc3	5-nucleotidase domain containing 3; Synthetic construct Mus musculus clone IMAGE:100069513, MGC:199415 5'-nucleotidase domain containing 3 (Nt5dc3) mRNA, encodes complete protein.; 5'-nucleotidase domain containing 3	Coding	18.79	0.0017	0.0298			T
TC0900001347.mm.1	-4.47	T	Rpl29	ribosomal protein L29; ribosomal protein L29, mRNA (cDNA clone MGC:6127 IMAGE:3590425), complete cds.; ribosomal protein L29, mRNA (cDNA clone MGC:103210 IMAGE:6487045), complete cds.; ribosomal protein L29, mRNA (cDNA clone MGC:102595 IMAGE:5006561), complete cds.; ribosomal protein L29, mRNA (cDNA clone MGC:106844 IMAGE:1430129), complete cds.	Coding	18.78	4.98e-07	7.18e-05			T
TC1900000117.mm.1	12.34	T	Pygm	muscle glycogen phosphorylase	Multiple_Complex	18.78	0.0012	0.0234			T
TC1400001537.mm.1	1.43	T	Anxa7	annexin A7	Multiple_Complex	18.76	9.86e-05	0.0037			T
TC1300000607.mm.1	-37.59	T	Gadd45g	growth arrest and DNA-damage-inducible 45 gamma	Multiple_Complex	18.76	9.62e-06	0.0006	Intron Retention	0.34	T
TC1400002222.mm.1	-1.08	T	Tdh	L-threonine dehydrogenase	Multiple_Complex	18.75	5.08e-08	1.41e-05			T
TC1600000667.mm.1	2.05	T	Ccdc80	coiled-coil domain containing 80; Synthetic construct Mus musculus clone IMAGE:100068102, MGC:195719 coiled-coil domain containing 80 (Ccdc80) mRNA, encodes complete protein.	Multiple_Complex	18.74	0.0003	0.0075			T
TC1300000638.mm.1	2.49	T	Tspan17	tetraspanin 17	Multiple_Complex	18.73	2.68e-05	0.0014			T
TC1700000603.mm.1	-1.8	T	Wdr46	WD repeat domain 46	Multiple_Complex	18.72	8.25e-09	3.84e-06			T
TC1500002039.mm.1	-18.19	T	Mapk11	mitogen-activated protein kinase 11	Coding	18.7	3.17e-07	5.18e-05	Cassette Exon	0.23	T
TC1600000673.mm.1	-1.48	T	Gm6030	predicted gene 6030	Multiple_Complex	18.69	0.0019	0.0318			T
TC1100004092.mm.1	5.82	T	Caskin2	CASK-interacting protein 2	Multiple_Complex	18.68	6.34e-05	0.0026			T
TC0600002323.mm.1	4.97	T	Nod1	nucleotide-binding oligomerization domain containing 1	Coding	18.67	3.57e-07	5.64e-05			T
TC0200004878.mm.1	1.39	T	Snph	syntaphilin	Multiple_Complex	18.66	7.43e-07	9.6e-05			T
TC0900001158.mm.1	-1.58	T	Adamts7	a disintegrin-like and metallopeptidase (reprolysin type) with thrombospondin type 1 motif, 7	Multiple_Complex	18.65	8.3e-05	0.0032			T
TC0100000814.mm.1	-1.22	T	Gigyf2	GRB10 interacting GYF protein 2	Multiple_Complex	18.61	2.66e-06	0.0002			T
TC0600001998.mm.1	1.24	T	Tmem209	transmembrane protein 209	Multiple_Complex	18.6	0.0012	0.0226			T
TC1300001633.mm.1	-138.48	T	Hist1h3e	histone cluster 1, H3e; Synthetic construct Mus musculus clone IMAGE:100062267, MGC:190441 histone cluster 1, H3e (Hist1h3e) mRNA, encodes complete protein.	Coding	18.56	0.0002	0.0055	Alternative 5' Donor Site	0.23	T
TC0200002040.mm.1	1.45	T	1110034G24Rik	RIKEN cDNA 1110034G24 gene	Multiple_Complex	18.52	0.0009	0.0181			T
TC1500002141.mm.1	-23.05	T	Slc38a1	solute carrier family 38, member 1	Multiple_Complex	18.51	1.83e-05	0.0011			T
TC0100003080.mm.1	74.17	T	Nfasc	neurofascin	Multiple_Complex	18.47	2.21e-06	0.0002			T
TC0200004671.mm.1	-21.1	T	Pcna	proliferating cell nuclear antigen	Multiple_Complex	18.47	7.85e-09	3.73e-06	Alternative 3' Acceptor Site	0.27	T
TC0100000642.mm.1	8.16	T	Cyp27a1	cytochrome P450, family 27, subfamily a, polypeptide 1	Coding	18.46	2.66e-05	0.0014			T
TC1800000327.mm.1	3.74	T	Cystm1	cysteine-rich transmembrane module containing 1	Multiple_Complex	18.46	7.94e-05	0.0031			T
TC1500000237.mm.1	1.17	T	Matn2	matrilin 2	Multiple_Complex	18.45	5.83e-05	0.0025			T
TC1800000638.mm.1	1.37	T	Sh3tc2	SH3 domain and tetratricopeptide repeats 2; Synthetic construct Mus musculus clone IMAGE:100063631, MGC:191100 SH3 domain and tetratricopeptide repeats 2 (Sh3tc2) mRNA, encodes complete protein.	Coding	18.44	0.0009	0.0182			T
TC1100001684.mm.1	-7.83	T	BC030867	cDNA sequence BC030867	Multiple_Complex	18.41	1.63e-05	0.001			T
TC0400002713.mm.1	1.1	T	Epb41l4b	erythrocyte membrane protein band 4.1 like 4b	Multiple_Complex	18.29	1.08e-07	2.41e-05			T
TC1500000733.mm.1	3.1	T	Csdc2	cold shock domain containing C2, RNA binding	Multiple_Complex	18.28	3.16e-05	0.0016	Alternative 5' Donor Site	0.34	T
TC0700004224.mm.1	1.03	T	Ndufab1	NADH dehydrogenase (ubiquinone) 1, alpha/beta subcomplex, 1	Multiple_Complex	18.28	7.84e-06	0.0006	Alternative 3' Acceptor Site	0.31	T
TC0500001911.mm.1	1.02	T	Cfap69	cilia and flagella associated protein 69	Coding	18.28	0.0008	0.0179			T
TC0100002656.mm.1	69.73	T	Dock10	dedicator of cytokinesis 10; dedicator of cytokinesis 10 (Dock10), mRNA.	Multiple_Complex	18.24	0.002	0.0341			T
TC0200000514.mm.1	5.52	T	Cercam	cerebral endothelial cell adhesion molecule	Multiple_Complex	18.21	0.0023	0.0372			T
TC0900002656.mm.1	1.15	T	Unc13c	unc-13 homolog C (C. elegans)	Multiple_Complex	18.21	1.42e-06	0.0002			T
TC1100000891.mm.1	-10.76	T	Ctc1	CTS telomere maintenance complex component 1	Multiple_Complex	18.19	0.0003	0.0077			T
TC1100003817.mm.1	2.53	T	Dusp3	dual specificity phosphatase 3 (vaccinia virus phosphatase VH1-related)	Multiple_Complex	18.18	8.1e-06	0.0006			T
TC0100001736.mm.1	-1.04	T	Dnah14	dynein, axonemal, heavy chain 14	Multiple_Complex	18.17	0.0005	0.0131			T
TC0400002812.mm.1	1.02	T	Tnc	tenascin C	Coding	18.15	3.4e-08	1.04e-05			T
TC1500001044.mm.1	-1.21	T	Higd1c; Methig1; Mettl7a2	HIG1 domain family, member 1C; methyltransferase hypoxia inducible domain containing 1; methyltransferase like 7A2	Coding	18.14	1.75e-09	1.32e-06	Alternative 5' Donor Site	0.26	T
TC0700002617.mm.1	1.86	T	Atp1a3	ATPase, Na+/K+ transporting, alpha 3 polypeptide (Atp1a3), mRNA.; ATPase, Na+/K+ transporting, alpha 3 polypeptide	Multiple_Complex	18.13	1.4e-06	0.0002			T
TC0700004173.mm.1	-2.05	T	Coq7	demethyl-Q 7	Multiple_Complex	18.09	7.32e-07	9.5e-05	Alternative 3' Acceptor Site	0.26	T
TC1500001657.mm.1	319.48	T	Ndrg1	N-myc downstream regulated gene 1	Multiple_Complex	18.08	8.99e-05	0.0034			T
TC0700003420.mm.1	1.76	T	Tjp1	tight junction protein 1	Multiple_Complex	18.04	0.0002	0.0072			T
TC0900003138.mm.1	1.55	T	Arpp21	cyclic AMP-regulated phosphoprotein, 21	Multiple_Complex	18.03	0.0003	0.0076			T
TC0800003099.mm.1	-8.92	T	Fanca	Fanconi anemia, complementation group A	Multiple_Complex	18.02	3.3e-06	0.0003			T
TC1100001538.mm.1	9.07	T	Arhgap23; 4933428G20Rik	Rho GTPase activating protein 23; Synthetic construct Mus musculus clone IMAGE:100062849, MGC:190973 RIKEN cDNA 4933428G20 gene (4933428G20Rik) mRNA, encodes complete protein.	Multiple_Complex	18.01	0.0001	0.0039			T
TC0X00001766.mm.1	1.42	T	Clcn5	chloride channel 5	Multiple_Complex	18.01	0.0002	0.0059			T
TC0500002053.mm.1	-1.05	T	Srpk2	serine/arginine-rich protein specific kinase 2	Multiple_Complex	18	5.78e-06	0.0004			T
TC0300003101.mm.1	-4.64	T	Rpf1	ribosome production factor 1 homolog (S. cerevisiae)	Coding	17.97	6.24e-06	0.0005			T
TC1300000524.mm.1	-1.16	T			NonCoding	17.95	0.0002	0.0063			T
TC1300001666.mm.1	-16.84	T	Gmnn	geminin	Coding	17.94	5.17e-05	0.0023	Alternative 3' Acceptor Site	0.23	T
TC0100001302.mm.1	-2.51	T	Zbtb41	zinc finger and BTB domain containing 41 homolog	Multiple_Complex	17.92	0.0002	0.0055			T
TC0700004318.mm.1	-1.19	T	Sept1	septin 1	Multiple_Complex	17.91	1.87e-07	3.56e-05			T
TC1200001554.mm.1	1.1	T			NonCoding	17.89	7.32e-05	0.0029			T
TC0800002066.mm.1	3.62	T	Dlc1	deleted in liver cancer 1	Multiple_Complex	17.88	2.31e-05	0.0013			T
TC0100001581.mm.1	47.4	T	Adamts4	a disintegrin-like and metallopeptidase (reprolysin type) with thrombospondin type 1 motif, 4	Coding	17.79	1.04e-05	0.0007			T
TC0200002803.mm.1	-1.03	T	Slc17a9	solute carrier family 17, member 9	Multiple_Complex	17.79	4.7e-05	0.0021			T
TC0100001330.mm.1	3.4	T	Brinp3	bone morphogenetic protein/retinoic acid inducible neural specific 3	Multiple_Complex	17.75	2.83e-05	0.0015			T
TC0400003854.mm.1	2.5	T	4933427I22Rik	RIKEN cDNA 4933427I22 gene	NonCoding	17.74	2.31e-06	0.0002			T
TC1800001743.mm.1	1.67	T	Gm5820; Arhgap26	predicted gene 5820; Rho GTPase activating protein 26; predicted gene 5820 (Gm5820), mRNA.	Multiple_Complex	17.71	1.69e-05	0.001			T
TC1700000924.mm.1	1.55	T	Tfeb	transcription factor EB	Multiple_Complex	17.71	0.0001	0.0047	Cassette Exon	0.25	T
TC0900003038.mm.1	-1.13	T	Gnai2	guanine nucleotide binding protein (G protein), alpha inhibiting 2	Coding	17.65	3.01e-09	1.9e-06			T
TC0100001063.mm.1	3.51	T	Tfcp2l1	transcription factor CP2-like 1	Multiple_Complex	17.64	0.0002	0.0069			T
TC1100000571.mm.1	-1.08	T	Phykpl	5-phosphohydroxy-L-lysine phospholyase	Multiple_Complex	17.62	6.3e-06	0.0005			T
TC1300002526.mm.1	1.3	T	Mccc2	methylcrotonoyl-Coenzyme A carboxylase 2 (beta)	Coding	17.62	2.07e-07	3.81e-05			T
TC1600000860.mm.1	-1.06	T			NonCoding	17.61	4.21e-05	0.0019			T
TC1200001072.mm.1	-2.73	T	Papola	poly (A) polymerase alpha; Synthetic construct Mus musculus clone IMAGE:100062187, MGC:190402 poly (A) polymerase alpha (Papola) mRNA, encodes complete protein.	Multiple_Complex	17.59	2.28e-08	7.91e-06			T
TC1000002632.mm.1	-144.43	T	Ascl1	achaete-scute complex homolog 1 (Drosophila)	Coding	17.59	7.03e-11	1.58e-07			T
TC1200000309.mm.1	-1.1	T			NonCoding	17.57	0.0005	0.0121			T
TC0900002458.mm.1	1.09	T	A730043L09Rik	RIKEN cDNA A730043L09 gene	Multiple_Complex	17.56	7.56e-05	0.003			T
TC1300001635.mm.1	-19.78	T	Hist1h2bf	histone cluster 1, H2bf; Synthetic construct Mus musculus clone IMAGE:100064051, MGC:193422 histone cluster 1, H2bf (Hist1h2bf) mRNA, encodes complete protein.	Coding	17.56	3.93e-08	1.16e-05	Alternative 5' Donor Site	0.23	T
TC1100001161.mm.1	3.16	T	Slc46a1	solute carrier family 46, member 1	Multiple_Complex	17.56	1.57e-06	0.0002	Cassette Exon	0.33	T
TC1200001353.mm.1	-1.51	T	Ncoa1	nuclear receptor coactivator 1	Coding	17.51	1.18e-05	0.0008			T
TC1400002493.mm.1	1.79	T	Lect1	leukocyte cell derived chemotaxin 1	Multiple_Complex	17.51	6.18e-09	3.19e-06			T
TC0700002445.mm.1	3.17	T	Hif3a	hypoxia inducible factor 3, alpha subunit	Multiple_Complex	17.49	3.03e-08	9.58e-06	Alternative 5' Donor Site	0.27	T
TC1100002046.mm.1	-10.47	T	Hmga1-rs1	high mobility group AT-hook I, related sequence 1	Multiple_Complex	17.49	1.1e-06	0.0001	Cassette Exon	0.23	T
TC0400002787.mm.1	-2.48	T	Cdc26	cell division cycle 26	Multiple_Complex	17.48	0.0005	0.0114	Alternative 3' Acceptor Site	0.32	T
TC0800003090.mm.1	-3.53	T	LOC100861897	PREDICTED: uncharacterized LOC100861897, transcript variant 1 (LOC100861897), miscRNA.; PREDICTED: uncharacterized LOC100861897, transcript variant 2 (LOC100861897), miscRNA.	NonCoding	17.47	4.36e-05	0.002			T
TC0500003415.mm.1	-1.12	T	Orai2	ORAI calcium release-activated calcium modulator 2	Coding	17.46	5.18e-06	0.0004			T
TC1600001050.mm.1	-14.93	T	Chaf1b	chromatin assembly factor 1, subunit B (p60)	Multiple_Complex	17.46	0.0001	0.0037			T
TC1100001004.mm.1	-1.85	T	Ankfy1	ankyrin repeat and FYVE domain containing 1	Multiple_Complex	17.45	1.17e-06	0.0001	Alternative 5' Donor Site	0.34	T
TC1100003855.mm.1	-5.77	T	Eftud2	elongation factor Tu GTP binding domain containing 2; elongation factor Tu GTP binding domain containing 2 (Eftud2), transcript variant 2, mRNA.	Multiple_Complex	17.44	3.23e-05	0.0016	Alternative 5' Donor Site	0.24	T
TC1500001658.mm.1	-19.31	T	St3gal1	ST3 beta-galactoside alpha-2,3-sialyltransferase 1	Multiple_Complex	17.43	1.85e-08	6.76e-06			T
TC0600002763.mm.1	-2.44	T	Magi1	membrane associated guanylate kinase, WW and PDZ domain containing 1; membrane associated guanylate kinase, WW and PDZ domain containing 1 (Magi1), transcript variant 3, mRNA.; membrane associated guanylate kinase, WW and PDZ domain containing 1 (Magi1), transcript variant 4, mRNA.; membrane associated guanylate kinase, WW and PDZ domain containing 1 (Magi1), transcript variant 1, mRNA.	Multiple_Complex	17.42	8.02e-05	0.0032			T
TC1100003394.mm.1	1.72	T	Mmp28	matrix metallopeptidase 28 (epilysin)	Multiple_Complex	17.39	1.06e-05	0.0007			T
TC0400003760.mm.1	-1.47	T	Srrm1	serine/arginine repetitive matrix 1	Multiple_Complex	17.34	4.93e-05	0.0022			T
TC1300001794.mm.1	2.73	T	Eci2	enoyl-Coenzyme A delta isomerase 2	Multiple_Complex	17.32	1.18e-05	0.0008	Cassette Exon	0.26	T
TC0400000349.mm.1	-4.07	T	Dnaja1; Mir207	DnaJ (Hsp40) homolog, subfamily A, member 1; microRNA 207	Multiple_Complex	17.31	0.0008	0.0169			T
TC1600001057.mm.1	-2.34	T	Ttc3	tetratricopeptide repeat domain 3; Synthetic construct Mus musculus clone IMAGE:100068069, MGC:195686 tetratricopeptide repeat domain 3 (Ttc3) mRNA, encodes complete protein.	Multiple_Complex	17.29	0.003	0.0452			T
TC1200001109.mm.1	2.53	T	Eml1	echinoderm microtubule associated protein like 1; echinoderm microtubule associated protein like 1 (Eml1), transcript variant 2, mRNA.	Multiple_Complex	17.28	0.0004	0.0095			T
TC0300002220.mm.1	2.72	T	Gucy1a3; Mir7010	guanylate cyclase 1, soluble, alpha 3; microRNA 7010	Multiple_Complex	17.28	2.02e-05	0.0011	Cassette Exon	0.28	T
TC0600001212.mm.1	3.31	T	Grm7	glutamate receptor, metabotropic 7	Multiple_Complex	17.28	0.0002	0.0069			T
TC0800000539.mm.1	-9.57	T	Cenpu	centromere protein U	Multiple_Complex	17.27	3.28e-05	0.0016			T
TC1800000322.mm.1	5.36	T	Psd2	pleckstrin and Sec7 domain containing 2; pleckstrin and Sec7 domain containing 2 (Psd2), mRNA.	Multiple_Complex	17.27	0.0005	0.0114			T
TC1300001928.mm.1	-16.99	T	Dek	DEK oncogene (DNA binding)	Multiple_Complex	17.27	2.49e-07	4.35e-05			T
TC0300002245.mm.1	2.34	T	Fhdc1	FH2 domain containing 1	Multiple_Complex	17.26	0.0005	0.0121	Alternative 5' Donor Site	0.38	T
TC0600003060.mm.1	1	T	Iqsec3	IQ motif and Sec7 domain 3; Synthetic construct Mus musculus clone IMAGE:100068357, MGC:195901 IQ motif and Sec7 domain 3 (Iqsec3) mRNA, encodes complete protein.; IQ motif and Sec7 domain 3 (Iqsec3), mRNA.	Multiple_Complex	17.25	1.09e-06	0.0001			T
TC0600002056.mm.1	1.92	T	Wdr91	WD repeat domain 91	Multiple_Complex	17.23	3.61e-05	0.0017			T
TC0700001349.mm.1	-1.43	T	Ndufc2	NADH dehydrogenase (ubiquinone) 1, subcomplex unknown, 2	Multiple_Complex	17.22	0.0003	0.0077	Alternative 5' Donor Site	0.33	T
TC0100000985.mm.1	-1.15	T	Cntnap5b	contactin associated protein-like 5B; Synthetic construct Mus musculus clone IMAGE:100068083, MGC:195700 contactin associated protein-like 5B (Cntnap5b) mRNA, encodes complete protein.	Coding	17.2	0.0022	0.0363			T
TC1100001535.mm.1	-1.02	T	Mrpl45	mitochondrial ribosomal protein L45	Coding	17.2	6.08e-06	0.0005	Alternative 5' Donor Site	0.4	T
TC0700000285.mm.1	2.53	T	Dmpk	dystrophia myotonica-protein kinase	Multiple_Complex	17.19	0.0004	0.0106			T
TC0400001171.mm.1	-1.52	T	Faf1	Fas-associated factor 1	Multiple_Complex	17.17	3.39e-05	0.0017			T
TC0800000541.mm.1	-11.17	T	Casp3	caspase 3; caspase 3 (Casp3), mRNA.	Multiple_Complex	17.16	2.35e-07	4.16e-05	Alternative 3' Acceptor Site	0.23	T
TC0100001313.mm.1	3.69	T	B3galt2	UDP-Gal:betaGlcNAc beta 1,3-galactosyltransferase, polypeptide 2	Multiple_Complex	17.14	1.99e-05	0.0011			T
TC0700004655.mm.1	-21.77	T	Blm	Bloom syndrome, RecQ helicase-like	Multiple_Complex	17.1	2.4e-10	3.39e-07	Cassette Exon	0.25	T
TC0900000069.mm.1	1.17	T	Pgr	progesterone receptor	Multiple_Complex	17.08	5.78e-06	0.0004	Alternative 5' Donor Site	0.27	T
TC0500000492.mm.1	2.62	T	9630001P10Rik	RIKEN cDNA 9630001P10 gene	NonCoding	17.07	0.001	0.0197	Alternative 3' Acceptor Site	0.27	T
TC0300000054.mm.1	-3.06	T	Zbtb10	zinc finger and BTB domain containing 10	Multiple_Complex	17.04	7.01e-06	0.0005			T
TC0800001390.mm.1	-36.36	T	Cenpn	centromere protein N	Coding	17.01	5.93e-07	8.15e-05	Cassette Exon	0.23	T
TC0900000465.mm.1	-1.89	T	3110039I08Rik	RIKEN cDNA 3110039I08 gene; RIKEN cDNA 3110039I08 gene (3110039I08Rik), non-coding RNA.	NonCoding	17	0.0004	0.0099	Cassette Exon	0.25	T
TC0100003096.mm.1	2.82	T	Atp2b4; Mir6903	ATPase, Ca++ transporting, plasma membrane 4; microRNA 6903	Multiple_Complex	16.93	5.83e-05	0.0025			T
TC0600002490.mm.1	1.75	T	Vamp8	vesicle-associated membrane protein 8	Multiple_Complex	16.87	1.2e-06	0.0001			T
TC0X00000207.mm.1	-16.9	T	Jade3	jade family PHD finger 3	Multiple_Complex	16.85	3.2e-07	5.22e-05			T
TC1400000271.mm.1	1.27	T	Arhgef3	Rho guanine nucleotide exchange factor (GEF) 3; Rho guanine nucleotide exchange factor (GEF) 3 (Arhgef3), mRNA.; Rho guanine nucleotide exchange factor (GEF) 3, mRNA (cDNA clone IMAGE:3484755), partial cds.	Multiple_Complex	16.85	0.0008	0.0176			T
TC0700004441.mm.1	5.44	T	D7Ertd443e	DNA segment, Chr 7, ERATO Doi 443, expressed	Multiple_Complex	16.85	1.25e-05	0.0008			T
TC0800000972.mm.1	1.07	T	Dnase2a; Gm38426	deoxyribonuclease II alpha; predicted gene, 38426; ES cells cDNA, RIKEN full-length enriched library, clone:2410038B05 product:unclassifiable, full insert sequence.	Multiple_Complex	16.84	1.01e-05	0.0007			T
TC0500000642.mm.1	20.23	T	Limch1	LIM and calponin homology domains 1	Multiple_Complex	16.84	1.42e-06	0.0002			T
TC0200000222.mm.1	2.63	T	Il15ra	interleukin 15 receptor, alpha chain; interleukin 15 receptor, alpha chain (Il15ra), transcript variant 2, mRNA.; interleukin 15 receptor, alpha chain (Il15ra), transcript variant 1, mRNA.	Multiple_Complex	16.83	0.0014	0.0255	Alternative 3' Acceptor Site	0.2	T
TC1100002471.mm.1	2.13	T	Rhbdf1	rhomboid family 1 (Drosophila)	Multiple_Complex	16.81	4.38e-07	6.55e-05			T
TC0400004153.mm.1	96.24	T	Tmem88b	transmembrane protein 88B	Multiple_Complex	16.77	1.83e-06	0.0002			T
TC0700004296.mm.1	2.64	T	Aldoa	aldolase A, fructose-bisphosphate	Multiple_Complex	16.75	4.33e-05	0.002			T
TC0100000240.mm.1	2.2	T	Arid5a	AT rich interactive domain 5A (MRF1-like)	Multiple_Complex	16.73	0.0002	0.0072			T
TC0400000109.mm.1	-2.71	T	Gm11847	predicted gene 11847	Pseudogene	16.72	0.0002	0.0059			T
TC1700000949.mm.1	1.6	T	Kif6	kinesin family member 6	Multiple_Complex	16.71	3.49e-06	0.0003			T
TC1600002110.mm.1	2.02	T	Cldn14	claudin 14	Multiple_Complex	16.69	5.42e-07	7.64e-05	Alternative 5' Donor Site	0.27	T
TC0800001437.mm.1	-8.63	T	Gse1	genetic suppressor element 1	Multiple_Complex	16.64	1.57e-09	1.22e-06	Cassette Exon	0.35	T
TC1700002348.mm.1	96.15	T	Tubb4a	tubulin, beta 4A class IVA	Coding	16.57	3.73e-05	0.0018			T
TC1200002493.mm.1	2.19	T	Wdr60	WD repeat domain 60	Coding	16.55	1.26e-06	0.0001			T
TC0400001774.mm.1	-5.92	T	Mfap2	microfibrillar-associated protein 2	Multiple_Complex	16.54	2.96e-08	9.45e-06			T
TC1500002158.mm.1	1.36	T	Hdac7	histone deacetylase 7	Multiple_Complex	16.53	0.0006	0.014			T
TC1800000282.mm.1	2.07	T	Apc	adenomatosis polyposis coli	Multiple_Complex	16.53	0.0011	0.0224			T
TC1500000605.mm.1	3.85	T	Gpt	glutamic pyruvic transaminase, soluble	Multiple_Complex	16.52	6.63e-07	8.83e-05	Cassette Exon	0.27	T
TC0900003344.mm.1	349.01	T	Trf	transferrin	Multiple_Complex	16.49	0.0012	0.023			T
TC0X00002447.mm.1	-14.68	T	Flna	filamin, alpha	Multiple_Complex	16.49	4.82e-06	0.0004			T
TC0600000931.mm.1	-11.72	T			NonCoding	16.49	5.12e-05	0.0023			T
TC0400003653.mm.1	-12.26	T	Epb41	erythrocyte membrane protein band 4.1	Multiple_Complex	16.47	2.51e-06	0.0002			T
TC0600000456.mm.1	-7.5	T	Casp2	caspase 2	Multiple_Complex	16.46	0.0002	0.0052	Alternative 3' Acceptor Site	0.24	T
TC0800001639.mm.1	-31.41	T	Shcbp1	Shc SH2-domain binding protein 1	Multiple_Complex	16.44	0.0003	0.0077			T
TC0600001342.mm.1	6.77	T	Ninj2	ninjurin 2	Coding	16.44	7.81e-09	3.72e-06	Cassette Exon	0.21	T
TC0800002724.mm.1	1.53	T			NonCoding	16.43	1.91e-05	0.0011			T
TC1100002986.mm.1	-1.35	T			NonCoding	16.42	0.0002	0.0053			T
TC0900001261.mm.1	-3.05	T	Stag1	stromal antigen 1	Multiple_Complex	16.36	0.0032	0.0464			T
TC1000000813.mm.1	8.34	T	Hcn2	hyperpolarization-activated, cyclic nucleotide-gated K+ 2	Coding	16.35	5.44e-07	7.66e-05	Cassette Exon	0.32	T
TC0500001821.mm.1	1.02	T	Mtus2	microtubule associated tumor suppressor candidate 2	Multiple_Complex	16.33	1.07e-10	2.04e-07			T
TC0200001819.mm.1	-9.76	T	Wdr76	WD repeat domain 76	Multiple_Complex	16.32	1.25e-05	0.0008			T
TC1100000029.mm.1	2.65	T	Gal3st1	galactose-3-O-sulfotransferase 1	Coding	16.32	0.0003	0.009			T
TC0900002887.mm.1	2.21	T	Zbtb38; E030011O05Rik	zinc finger and BTB domain containing 38; RIKEN cDNA E030011O05 gene; Synthetic construct Mus musculus clone IMAGE:100063566, MGC:191093 zinc finger and BTB domain containing 38 (Zbtb38) mRNA, encodes complete protein.	Multiple_Complex	16.31	2.59e-05	0.0014	Cassette Exon	0.27	T
TC1500000791.mm.1	8.7	T	Prr5	proline rich 5 (renal)	Coding	16.3	0.0006	0.0144			T
TC1800001728.mm.1	-2.2	T	Socs6	suppressor of cytokine signaling 6	Multiple_Complex	16.28	0.0008	0.0173			T
TC1000000246.mm.1	6.12	T	Ptprk	protein tyrosine phosphatase, receptor type, K	Multiple_Complex	16.28	0.0034	0.0492	Cassette Exon	0.32	T
TC1000001679.mm.1	19.92	T	Syne1	spectrin repeat containing, nuclear envelope 1	Multiple_Complex	16.27	0.0002	0.0072			T
TC1800001516.mm.1	-1.39	T	4930549G23Rik	RIKEN cDNA 4930549G23 gene; RIKEN cDNA 4930549G23 gene (4930549G23Rik), non-coding RNA.	NonCoding	16.26	2.01e-09	1.43e-06			T
TC0300000916.mm.1	-9.49	T	Anp32e	acidic (leucine-rich) nuclear phosphoprotein 32 family, member E	Multiple_Complex	16.26	9.67e-08	2.24e-05	Alternative 3' Acceptor Site	0.23	T
TC0700001959.mm.1	1.39	T	Ptpre	protein tyrosine phosphatase, receptor type, E; Synthetic construct Mus musculus clone IMAGE:100064089, MGC:193460 protein tyrosine phosphatase, receptor type, E (Ptpre) mRNA, encodes complete protein.	Multiple_Complex	16.23	9.95e-07	0.0001			T
TC1400000385.mm.1	4.39	T	Grid1	glutamate receptor, ionotropic, delta 1; Synthetic construct Mus musculus clone IMAGE:100068077, MGC:195694 glutamate receptor, ionotropic, delta 1 (Grid1) mRNA, encodes complete protein.	Multiple_Complex	16.22	0.0004	0.0096			T
TC0400002929.mm.1	-3.16	T	Nfib	nuclear factor I/B; nuclear factor I/B (Nfib), transcript variant 3, mRNA.	Multiple_Complex	16.21	0.0002	0.0062	Alternative 5' Donor Site	0.35	T
TC1300000523.mm.1	1.65	T	Gmpr	guanosine monophosphate reductase	Multiple_Complex	16.16	0.0002	0.0067	Cassette Exon	0.32	T
TC0100003868.mm.1	2.69	T			NonCoding	16.16	4.42e-05	0.002			T
TC1300001539.mm.1	1.1	T	Pgbd1	piggyBac transposable element derived 1	Coding	16.13	3.67e-06	0.0003	Alternative 5' Donor Site	0.27	T
TC0100000658.mm.1	1.88	T	Speg	SPEG complex locus	Multiple_Complex	16.12	0.0001	0.005			T
TC0400002822.mm.1	4.91	T	Astn2	astrotactin 2	Coding	16.1	2.3e-05	0.0012	Cassette Exon	0.21	T
TC1100002841.mm.1	-1.01	T	Obscn	obscurin, cytoskeletal calmodulin and titin-interacting RhoGEF	Coding	16.09	0.0006	0.0145			T
TC1000000147.mm.1	1.86	T	Map3k5	mitogen-activated protein kinase kinase kinase 5	Multiple_Complex	16.09	2.55e-05	0.0013			T
TC0900001367.mm.1	4.9	T	Cacna2d2	calcium channel, voltage-dependent, alpha 2/delta subunit 2	Multiple_Complex	16.07	6.78e-05	0.0028			T
TC0900003011.mm.1	1.37	T	Parp3	poly (ADP-ribose) polymerase family, member 3	Multiple_Complex	16.05	0.0005	0.0131			T
TC1200001075.mm.1	-2.01	T	Gm19554	PREDICTED: predicted gene, 19554 (Gm19554), miscRNA.	NonCoding	16.05	1.73e-05	0.001			T
TC0200004250.mm.1	-6.5	T	Qser1	glutamine and serine rich 1	Multiple_Complex	16.01	0.0002	0.0071			T
TC1300001395.mm.1	26.76	T	Pfkp	phosphofructokinase, platelet	Multiple_Complex	15.99	6.87e-05	0.0028			T
TC1600000415.mm.1	2.87	T	Dlg1	discs, large homolog 1 (Drosophila)	Multiple_Complex	15.96	0.0005	0.0126			T
TC1400002141.mm.1	19.51	T	Gjb6	gap junction protein, beta 6; gap junction protein, beta 6 (Gjb6), transcript variant 1, mRNA.	Multiple_Complex	15.95	5.16e-06	0.0004			T
TC1100002426.mm.1	1.95	T	Eml6	echinoderm microtubule associated protein like 6	Multiple_Complex	15.92	0.0004	0.0107			T
TC1800001410.mm.1	-1.03	T	Slc6a7	solute carrier family 6 (neurotransmitter transporter, L-proline), member 7	Coding	15.91	1.75e-07	3.38e-05			T
TC1000000158.mm.1	-7.61	T	Mtfr2	mitochondrial fission regulator 2	Coding	15.91	0.0029	0.044			T
TC1900001448.mm.1	2	T	Cpeb3	cytoplasmic polyadenylation element binding protein 3	Multiple_Complex	15.91	2.1e-05	0.0012			T
TC1900000426.mm.1	1.76	T	Slc1a1	solute carrier family 1 (neuronal/epithelial high affinity glutamate transporter, system Xag), member 1	Multiple_Complex	15.91	0.0031	0.0458			T
TC1400002165.mm.1	-1.15	T	Cdadc1	cytidine and dCMP deaminase domain containing 1	Coding	15.91	5.75e-05	0.0025			T
TC0400003092.mm.1	1.5	T	Cyp2j7	cytochrome P450, family 2, subfamily j, polypeptide 7	Multiple_Complex	15.83	6.08e-05	0.0026			T
TC1000000711.mm.1	1.89	T	Adora2a	adenosine A2a receptor	Coding	15.8	3.76e-05	0.0018			T
TC0900003333.mm.1	5.23	T	Nphp3	nephronophthisis 3 (adolescent)	Multiple_Complex	15.8	8.22e-06	0.0006			T
TC1100003146.mm.1	5.53	T	Spns2	spinster homolog 2	Multiple_Complex	15.8	0.0004	0.0098			T
TC1200000462.mm.1	-1.05	T	Srp54b; Srp54c	signal recognition particle 54B (Srp54b), mRNA.; signal recognition particle 54C; signal recognition particle 54B	Coding	15.78	4.01e-07	6.12e-05	Cassette Exon	0.25	T
TC1900001101.mm.1	-1.12	T			NonCoding	15.77	0.0029	0.0432			T
TC1200000334.mm.1	13.97	T	Agmo	alkylglycerol monooxygenase	Multiple_Complex	15.77	1.4e-05	0.0009			T
TC0700000563.mm.1	2.06	T	Nphs1	nephrosis 1, nephrin; Synthetic construct Mus musculus clone IMAGE:100062239, MGC:190426 nephrosis 1 homolog, nephrin (human) (Nphs1) mRNA, encodes complete protein.	Multiple_Complex	15.76	3.24e-09	2.01e-06			T
TC0700003486.mm.1	-3.97	T	Rpl17-ps10; Gm10294	ribosomal protein L17, pseudogene 10 [Source:MGI Symbol;Acc:MGI:3642871]; predicted pseudogene 10294	Pseudogene	15.73	2.32e-05	0.0013			T
TC0600001813.mm.1	1	T	Slc25a13	solute carrier family 25 (mitochondrial carrier, adenine nucleotide translocator), member 13	Multiple_Complex	15.69	0.0004	0.0111			T
TC1500000660.mm.1	-1.35	T	Triobp	TRIO and F-actin binding protein	Multiple_Complex	15.65	3.68e-08	1.11e-05			T
TC0700000974.mm.1	2.14	T			NonCoding	15.63	7.24e-05	0.0029			T
TC1900000362.mm.1	31.24	T			NonCoding	15.63	4.91e-05	0.0022			T
TC0100003015.mm.1	16.23	T	Map3k19	mitogen-activated protein kinase kinase kinase 19	Coding	15.58	0.0006	0.0135			T
TC0800002349.mm.1	3.53	T	Csgalnact1	chondroitin sulfate N-acetylgalactosaminyltransferase 1	Multiple_Complex	15.58	2.98e-06	0.0003	Cassette Exon	0.27	T
TC0600000245.mm.1	2.01	T	Ahcyl2	S-adenosylhomocysteine hydrolase-like 2	Multiple_Complex	15.57	3.82e-05	0.0018			T
TC1200002529.mm.1	1.77	T	Itpk1	inositol 1,3,4-triphosphate 5/6 kinase	Multiple_Complex	15.56	8.58e-05	0.0033			T
TC1400000780.mm.1	2.5	T	Cpne6	copine VI	Multiple_Complex	15.5	1.48e-08	5.73e-06	Cassette Exon	0.31	T
TC1500000528.mm.1	3.11	T	Adgrb1	adhesion G protein-coupled receptor B1	Multiple_Complex	15.48	0.0002	0.006			T
TC0X00001394.mm.1	1.14	T	Col4a5	collagen, type IV, alpha 5	Multiple_Complex	15.47	0.0014	0.0262			T
TC0X00001526.mm.1	-1.8	T	Huwe1	HECT, UBA and WWE domain containing 1	Multiple_Complex	15.46	0.0017	0.0296			T
TC1000002350.mm.1	2.57	T	Phyhipl; D630013N20Rik	phytanoyl-CoA hydroxylase interacting protein-like; RIKEN cDNA D630013N20 gene; RIKEN cDNA D630013N20 gene (D630013N20Rik), transcript variant 1, non-coding RNA.; RIKEN cDNA D630013N20 gene (D630013N20Rik), transcript variant 2, non-coding RNA.	Multiple_Complex	15.45	0.0005	0.0119			T
TC1200000336.mm.1	5.56	T	Dgkb	diacylglycerol kinase, beta	Multiple_Complex	15.45	0.0006	0.0143			T
TC1300000893.mm.1	131.29	T	Tppp	tubulin polymerization promoting protein	Multiple_Complex	15.45	0.0007	0.0162			T
TC0100003315.mm.1	38.43	T	Fam163a	family with sequence similarity 163, member A	Coding	15.43	8.98e-06	0.0006	Cassette Exon	0.21	T
TC0200003720.mm.1	1.04	T	Slc25a12	solute carrier family 25 (mitochondrial carrier, Aralar), member 12	Multiple_Complex	15.43	4.94e-05	0.0022	Cassette Exon	0.25	T
TC1900001485.mm.1	6.09	T	Sorbs1	sorbin and SH3 domain containing 1	Multiple_Complex	15.42	0.0014	0.0262			T
TC1700002292.mm.1	-1.03	T	Sult1c1	sulfotransferase family, cytosolic, 1C, member 1	Coding	15.4	1.77e-05	0.001			T
TC1700001975.mm.1	-1.31	T	Gtf2h4	general transcription factor II H, polypeptide 4	Multiple_Complex	15.4	7.11e-06	0.0005			T
TC0100000456.mm.1	-19.26	T	Nop58	NOP58 ribonucleoprotein	Coding	15.39	3.44e-06	0.0003			T
TC1900000906.mm.1	2.86	T	Carns1	carnosine synthase 1	Coding	15.39	0.0001	0.0046			T
TC1000000717.mm.1	1.29	T	Ggt1	gamma-glutamyltransferase 1	Multiple_Complex	15.39	0.0002	0.0059			T
TC0800002339.mm.1	1.96	T	Psd3	pleckstrin and Sec7 domain containing 3	Multiple_Complex	15.38	0.0005	0.0124			T
TC1500002056.mm.1	3.42	T	Arsa	arylsulfatase A	Multiple_Complex	15.37	1.87e-06	0.0002	Cassette Exon	0.31	T
TC1900000402.mm.1	5.16	T	Kank1	KN motif and ankyrin repeat domains 1	Multiple_Complex	15.34	1.25e-06	0.0001	Cassette Exon	0.25	T
TC1100000884.mm.1	-4.65	T	Rpl26; Gm15772	ribosomal protein L26; ribosomal protein L26 pseudogene	Multiple_Complex	15.33	0.0002	0.0053			T
TC1100003434.mm.1	-11.6	T	Brip1	BRCA1 interacting protein C-terminal helicase 1	Multiple_Complex	15.32	0.0001	0.0041			T
TC0800001110.mm.1	-1.04	T	Nlrc5; Mir7072	NLR family, CARD domain containing 5; microRNA 7072	Multiple_Complex	15.3	8.37e-05	0.0033			T
TC0100003175.mm.1	-1.04	T	Lhx9	LIM homeobox protein 9	Multiple_Complex	15.29	2.95e-08	9.42e-06			T
TC0300002792.mm.1	1.88	T			NonCoding	15.27	9.74e-06	0.0007			T
TC1700001113.mm.1	2.7	T	Dlgap1	discs, large (Drosophila) homolog-associated protein 1	Multiple_Complex	15.26	2.57e-05	0.0014			T
TC0500003286.mm.1	1.35	T	Tmem132d	transmembrane protein 132D	Multiple_Complex	15.26	1.01e-06	0.0001			T
TC1900000170.mm.1	-4.8	T	Eef1g	eukaryotic translation elongation factor 1 gamma	Multiple_Complex	15.25	2.37e-07	4.2e-05			T
TC0700002037.mm.1	-15.89	T	B4galnt4	beta-1,4-N-acetyl-galactosaminyl transferase 4; Synthetic construct Mus musculus clone IMAGE:100069478, MGC:199380 beta-1,4-N-acetyl-galactosaminyl transferase 4 (B4galnt4) mRNA, encodes complete protein.	Coding	15.24	3.37e-08	1.04e-05			T
TC0600002484.mm.1	-6.25	T	Usp39	ubiquitin specific peptidase 39	Multiple_Complex	15.23	0.0002	0.0061			T
TC0600002269.mm.1	13.93	T	Skap2	src family associated phosphoprotein 2	Coding	15.23	0.0008	0.017	Cassette Exon	0.2	T
TC0200002482.mm.1	1.82	T	Tox2	TOX high mobility group box family member 2	Coding	15.22	0.0002	0.0068			T
TC0300000168.mm.1	4.87	T	Pld1	phospholipase D1	Multiple_Complex	15.21	0.0011	0.0223	Cassette Exon	0.3	T
TC0500003221.mm.1	-1.51	T	Kdm2b; Gm2479	lysine (K)-specific demethylase 2B; lysine (K)-specific demethylase 2B (Kdm2b), transcript variant 3, mRNA.; PREDICTED: predicted gene 2479 (Gm2479), miscRNA.	Multiple_Complex	15.2	0.0002	0.0072			T
TC1900000051.mm.1	1.23	T	Slc29a2	solute carrier family 29 (nucleoside transporters), member 2	Coding	15.16	0.0005	0.0126			T
TC1000002267.mm.1	-2.28	T	Ccar1	cell division cycle and apoptosis regulator 1	Multiple_Complex	15.11	1.75e-05	0.001			T
TC1600000292.mm.1	1.05	T	Chrd	chordin	Multiple_Complex	15.11	6.37e-06	0.0005			T
TC0400000700.mm.1	-2.28	T	Prpf4	PRP4 pre-mRNA processing factor 4 homolog (yeast)	Multiple_Complex	15.08	0.0004	0.0108	Alternative 3' Acceptor Site	0.39	T
TC1900000183.mm.1	2.24	T	Fth1	ferritin heavy polypeptide 1; ferritin heavy chain 1	Multiple_Complex	15.08	3.12e-06	0.0003			T
TC0700001348.mm.1	-6.85	T	Alg8	asparagine-linked glycosylation 8 (alpha-1,3-glucosyltransferase)	Multiple_Complex	15.07	8.88e-06	0.0006	Alternative 3' Acceptor Site	0.24	T
TC0600002626.mm.1	4.58	T	Cml1	camello-like 1	Multiple_Complex	15.07	2.42e-05	0.0013	Alternative 5' Donor Site	0.36	T
TC1300002564.mm.1	9.97	T	Mast4	microtubule associated serine/threonine kinase family member 4	Multiple_Complex	15.06	0.002	0.0339			T
TC0600000010.mm.1	1.34	T	Col1a2	collagen, type I, alpha 2; procollagen type I alpha 2	Multiple_Complex	15.05	0.0004	0.0097			T
TC1000001773.mm.1	2.93	T	Aig1	androgen-induced 1	Multiple_Complex	15.05	1.67e-05	0.001			T
TC0500001338.mm.1	8.34	T	Slc8b1	solute carrier family 8 (sodium/lithium/calcium exchanger), member B1	Multiple_Complex	15.04	5.72e-06	0.0004	Cassette Exon	0.32	T
TC0800000333.mm.1	1.14	T	Kcnu1	potassium channel, subfamily U, member 1	Coding	15.03	6.57e-05	0.0027			T
TC0500002039.mm.1	-2.21	T	Rpl17-ps5	ribosomal protein L17, pseudogene 5	Pseudogene	15.01	1.98e-05	0.0011	Alternative 3' Acceptor Site	0.27	T
TC0400003421.mm.1	-10.07	T	Ybx1	Y box protein 1	Multiple_Complex	14.99	2.13e-05	0.0012			T
TC0300000871.mm.1	-8.52	T	Celf3	CUGBP, Elav-like family member 3; CUGBP, Elav-like family member 3 (Celf3), mRNA.	Multiple_Complex	14.99	0.0004	0.0103			T
TC0200003080.mm.1	-1.61	T	Arhgap21	Rho GTPase activating protein 21	Multiple_Complex	14.99	0.0001	0.0044			T
TC1400001054.mm.1	1.28	T	Lcp1	lymphocyte cytosolic protein 1	Multiple_Complex	14.98	0.0008	0.0167			T
TC0700003567.mm.1	-1.02	T	Plin1	perilipin 1	Coding	14.98	5.34e-06	0.0004			T
TC1500001987.mm.1	1.33	T	1810041L15Rik	RIKEN cDNA 1810041L15 gene	Multiple_Complex	14.97	2.55e-05	0.0013			T
TC0X00000961.mm.1	7.88	T	Gdpd2	glycerophosphodiester phosphodiesterase domain containing 2	Multiple_Complex	14.96	1.89e-07	3.58e-05			T
TC0200004754.mm.1	2.02	T			NonCoding	14.95	3.7e-07	5.78e-05			T
TC0700000515.mm.1	1.89	T	Lgals4; Lgals6	lectin, galactose binding, soluble 4; lectin, galactose binding, soluble 6; Synthetic construct Mus musculus clone IMAGE:100063923, MGC:193390 lectin, galactose binding, soluble 6 (Lgals6) mRNA, encodes complete protein.	Multiple_Complex	14.93	1.69e-06	0.0002	Cassette Exon	0.27	T
TC1300002059.mm.1	-8.9	T	Dbn1	drebrin 1	Multiple_Complex	14.92	8.3e-07	0.0001			T
TC1000001840.mm.1	-9.33	T	Myb	myeloblastosis oncogene	Multiple_Complex	14.92	2.75e-05	0.0014			T
TC1900000878.mm.1	-1.23	T	Ighmbp2	immunoglobulin mu binding protein 2; Synthetic construct Mus musculus clone IMAGE:100068142, MGC:195759 immunoglobulin mu binding protein 2 (Ighmbp2) mRNA, encodes complete protein.	Multiple_Complex	14.91	0.0001	0.0037			T
TC0900001663.mm.1	-1.19	T	Lars2	leucyl-tRNA synthetase, mitochondrial	Multiple_Complex	14.91	0.0024	0.0377	Alternative 3' Acceptor Site	0.33	T
TC1800001430.mm.1	2.78	T	Afap1l1	actin filament associated protein 1-like 1; Synthetic construct Mus musculus clone IMAGE:100016590, MGC:184586 actin filament associated protein 1-like 1 (Afap1l1) mRNA, encodes complete protein.	Multiple_Complex	14.91	0.0003	0.0089			T
TC0300001588.mm.1	13.35	T	Rpe65	retinal pigment epithelium 65	Coding	14.89	1.42e-05	0.0009			T
TC0200003529.mm.1	-1.7	T	Neb	nebulin	Multiple_Complex	14.88	0.0023	0.0371			T
TC1900001765.mm.1	1.29	T	Vps51; Tm7sf2	vacuolar protein sorting 51 homolog (S. cerevisiae); transmembrane 7 superfamily member 2	Multiple_Complex	14.86	0.0007	0.0149			T
TC0500001865.mm.1	-10.01	T	Brca2	breast cancer 2, early onset; Synthetic construct Mus musculus clone IMAGE:100069457, MGC:199359 breast cancer 2 (Brca2) mRNA, encodes complete protein.; breast cancer 2; breast cancer 2 (Brca2), transcript variant 2, mRNA.; breast cancer 2 (Brca2), transcript variant 1, mRNA.	Coding	14.82	3.43e-07	5.48e-05			T
TC0100001388.mm.1	1.38	T	A930039A15Rik	RIKEN cDNA A930039A15 gene	Coding	14.79	6.36e-08	1.66e-05			T
TC0200003880.mm.1	1.05	T	Serping1	serine (or cysteine) peptidase inhibitor, clade G, member 1	Multiple_Complex	14.78	5.97e-09	3.13e-06			T
TC0700001771.mm.1	2.05	T	Slc5a11	solute carrier family 5 (sodium/glucose cotransporter), member 11	Multiple_Complex	14.76	0.0003	0.0089			T
TC0500000106.mm.1	1.35	T	Speer8-ps1	spermatogenesis associated glutamate (E)-rich protein 8, pseudogene 1	NonCoding	14.76	1.34e-06	0.0001			T
TC1100000786.mm.1	-1.08	T	Fam83g	family with sequence similarity 83, member G	Multiple_Complex	14.75	3.34e-06	0.0003			T
TC0400004186.mm.1	-3.54	T	Nfia	nuclear factor I/A	Multiple_Complex	14.75	5.53e-06	0.0004			T
TC0X00000935.mm.1	-1.06	T			NonCoding	14.74	0.0007	0.0155			T
TC0500002598.mm.1	1.09	T	Usp46	ubiquitin specific peptidase 46	Multiple_Complex	14.73	0.0001	0.0049	Cassette Exon	0.2	T
TC1000002205.mm.1	-18.45	T	Edar	ectodysplasin-A receptor	Coding	14.72	1.23e-06	0.0001			T
TC0100001381.mm.1	-12.77	T	Rgs16	regulator of G-protein signaling 16	Coding	14.7	7.98e-05	0.0031			T
TC1100002862.mm.1	1.98	T	Flcn	folliculin	Multiple_Complex	14.69	3.76e-06	0.0003	Cassette Exon	0.34	T
TC0300002093.mm.1	1.34	T	A730090N16Rik	RIKEN cDNA A730090N16 gene	NonCoding	14.67	1.34e-05	0.0008	Alternative 5' Donor Site	0.3	T
TC1900001590.mm.1	1.52	T	Kcnip2	Kv channel-interacting protein 2	Multiple_Complex	14.66	0.0003	0.008	Cassette Exon	0.27	T
TC1100001789.mm.1	1.05	T	1810010H24Rik	RIKEN cDNA 1810010H24 gene	Multiple_Complex	14.64	4.93e-06	0.0004	Cassette Exon	0.25	T
TC1500002156.mm.1	9.12	T	Rapgef3	Rap guanine nucleotide exchange factor (GEF) 3	Multiple_Complex	14.63	0.0012	0.0228	Alternative 3' Acceptor Site	0.21	T
TC0200003579.mm.1	1.16	T	Acvr1	activin A receptor, type 1	Multiple_Complex	14.62	9.94e-05	0.0037			T
TC0600002221.mm.1	2.88	T	Zfp467	zinc finger protein 467	Multiple_Complex	14.61	3.88e-05	0.0018			T
TC0800002739.mm.1	5.44	T	Kifc3	kinesin family member C3	Coding	14.57	0.0002	0.0051	Cassette Exon	0.31	T
TC1100004144.mm.1	1.21	T	Tmc6	transmembrane channel-like gene family 6	Multiple_Complex	14.56	6.31e-05	0.0026	Alternative 3' Acceptor Site	0.21	T
TC0900000767.mm.1	2.68	T	Larp6	La ribonucleoprotein domain family, member 6	Coding	14.56	9.98e-06	0.0007			T
TC1100003037.mm.1	-5.92	T	Chd3	chromodomain helicase DNA binding protein 3; chromodomain helicase DNA binding protein 3 (Chd3), mRNA.	Multiple_Complex	14.54	8.61e-05	0.0033			T
TC0700003744.mm.1	-7.61	T	Gm19453	PREDICTED: predicted gene, 19453 (Gm19453), miscRNA.	NonCoding	14.52	0.0001	0.0042			T
TC0700002715.mm.1	1.7	T	Spred3	sprouty-related, EVH1 domain containing 3	Multiple_Complex	14.47	9.74e-06	0.0007			T
TC1000000571.mm.1	-15.68	T	Ppa1	pyrophosphatase (inorganic) 1	Multiple_Complex	14.46	9.69e-08	2.24e-05	Alternative 3' Acceptor Site	0.22	T
TC1200002089.mm.1	1.2	T	Pgf	placental growth factor	Coding	14.46	0.0024	0.0385			T
TC1800001193.mm.1	10.37	T	Hbegf	heparin-binding EGF-like growth factor	Coding	14.45	0.0003	0.0094			T
TC0200001769.mm.1	-10.3	T	Dll4	delta-like 4 (Drosophila)	Multiple_Complex	14.45	1.59e-06	0.0002			T
TC1100001802.mm.1	-1.23	T	Helz	helicase with zinc finger domain	Multiple_Complex	14.44	2.02e-06	0.0002			T
TC0100002229.mm.1	9.62	T	Chst10	carbohydrate sulfotransferase 10	Multiple_Complex	14.43	0.0014	0.0264			T
TC0100000509.mm.1	1.24	T	Nrp2	neuropilin 2; Synthetic construct Mus musculus clone IMAGE:100062848, MGC:190972 neuropilin 2 (Nrp2) mRNA, encodes complete protein.	Multiple_Complex	14.4	0.0008	0.0166			T
TC1800000980.mm.1	229.22	T	Abhd3	abhydrolase domain containing 3	Coding	14.4	0.0016	0.0288			T
TC0900002971.mm.1	5.9	T	Bfsp2	beaded filament structural protein 2, phakinin	Multiple_Complex	14.38	7.48e-08	1.87e-05			T
TC1200001616.mm.1	1.4	T	F730043M19Rik	RIKEN cDNA F730043M19 gene	NonCoding	14.36	0.0017	0.0303			T
TC1000003117.mm.1	-9.27	T	Shmt2	serine hydroxymethyltransferase 2 (mitochondrial)	Coding	14.36	2.54e-07	4.4e-05	Alternative 3' Acceptor Site	0.24	T
TC0100000853.mm.1	1	T	1700067G17Rik	RIKEN cDNA 1700067G17 gene; RIKEN cDNA 1700067G17 gene (1700067G17Rik), non-coding RNA.	NonCoding	14.35	0.0002	0.0068			T
TC0800001757.mm.1	-1.06	T	C030037F17Rik	RIKEN cDNA C030037F17 gene [Source:MGI Symbol;Acc:MGI:1924725]	Coding	14.35	0.0022	0.0357			T
TC1100001407.mm.1	1.42	T	Car10	carbonic anhydrase 10	Multiple_Complex	14.33	4.9e-06	0.0004			T
TC0600001258.mm.1	22.64	T	Irak2	interleukin-1 receptor-associated kinase 2	Multiple_Complex	14.32	0.0003	0.008			T
TC0100000404.mm.1	3.44	T	Plcl1	phospholipase C-like 1	Coding	14.32	3.34e-05	0.0016	Cassette Exon	0.28	T
TC1000000122.mm.1	-17.96	T	Cited2	Cbp/p300-interacting transactivator, with Glu/Asp-rich carboxy-terminal domain, 2	Coding	14.3	5.49e-07	7.71e-05	Alternative 5' Donor Site	0.33	T
TC1500001958.mm.1	-9.21	T	Tcf20	transcription factor 20	Multiple_Complex	14.29	2.1e-05	0.0012			T
TC1600000618.mm.1	-2.88	T	Zbtb20; Mir568	zinc finger and BTB domain containing 20; microRNA 568	Multiple_Complex	14.29	0.0003	0.0077			T
TC1100004147.mm.1	-9.6	T	Tk1	thymidine kinase 1	Multiple_Complex	14.29	9.87e-05	0.0037			T
TC1100004067.mm.1	8.47	T	Hid1	HID1 domain containing	Multiple_Complex	14.29	4.43e-05	0.002			T
TC0200000518.mm.1	-1.29	T	Sptan1	spectrin alpha, non-erythrocytic 1 (Sptan1), transcript variant 1, mRNA.; spectrin alpha, non-erythrocytic 1	Multiple_Complex	14.27	0.0005	0.0119			T
TC0100001037.mm.1	-1.33	T	Cdh7	cadherin 7, type 2	Multiple_Complex	14.27	7.43e-06	0.0005			T
TC1700000464.mm.1	1.46	T	Pacsin1	protein kinase C and casein kinase substrate in neurons 1; protein kinase C and casein kinase substrate in neurons 1 (Pacsin1), transcript variant 1, mRNA.	Multiple_Complex	14.25	2.77e-06	0.0003			T
TC0X00001390.mm.1	-1.06	T	Atg4a	autophagy related 4A, cysteine peptidase	Multiple_Complex	14.25	0.0004	0.0109	Cassette Exon	0.22	T
TC0200003164.mm.1	6.56	T	Tmem141	transmembrane protein 141	Multiple_Complex	14.24	2.61e-06	0.0002			T
TC0800001097.mm.1	-3.23	T	Nup93	nucleoporin 93	Coding	14.23	0.0004	0.011	Alternative 5' Donor Site	0.22	T
TC1000002316.mm.1	1.52	T	Zfp365	zinc finger protein 365	Multiple_Complex	14.22	2.7e-06	0.0003			T
TC1600001308.mm.1	-13.5	T	Ranbp1	RAN binding protein 1	Multiple_Complex	14.21	0.0006	0.014			T
TC0400001307.mm.1	10.26	T	Elovl1	elongation of very long chain fatty acids (FEN1/Elo2, SUR4/Elo3, yeast)-like 1	Multiple_Complex	14.2	4.91e-05	0.0022			T
TC0X00002072.mm.1	-1.04	T	Rhox2-ps; Gm6310	reproductive homeobox 2, pseudogene [Source:MGI Symbol;Acc:MGI:3646282]; predicted pseudogene 6310	Pseudogene	14.19	3.22e-08	9.99e-06			T
TC1300000626.mm.1	-3.72	T	Simc1	SUMO-interacting motifs containing 1	Multiple_Complex	14.18	0.0013	0.0245			T
TC0100003128.mm.1	-5.11	T	Ipo9	importin 9	Multiple_Complex	14.18	0.0002	0.0051			T
TC0200001947.mm.1	-4.98	T	Polr1b	polymerase (RNA) I polypeptide B	Multiple_Complex	14.18	0.0009	0.0183			T
TC0300002838.mm.1	1.72	T	Tmem56	transmembrane protein 56	Multiple_Complex	14.15	0.0015	0.0279	Cassette Exon	0.27	T
TC0500001447.mm.1	-1.34	T	Tmed2	transmembrane emp24 domain trafficking protein 2	Coding	14.14	6.76e-05	0.0028			T
TC1000001183.mm.1	-10.9	T	Btg1	B cell translocation gene 1, anti-proliferative	Multiple_Complex	14.14	6.87e-07	9.04e-05			T
TC0200000694.mm.1	1.16	T	Crb2	crumbs family member 2; crumbs homolog 2 (Drosophila)	Multiple_Complex	14.14	0.0003	0.0092	Cassette Exon	0.23	T
TC0500001757.mm.1	-1.95	T	Trrap	transformation/transcription domain-associated protein	Multiple_Complex	14.13	3.78e-05	0.0018	Alternative 3' Acceptor Site	0.37	T
TC0300000732.mm.1	1.36	T	Arhgef2	rho/rac guanine nucleotide exchange factor (GEF) 2	Multiple_Complex	14.12	2.2e-08	7.69e-06			T
TC1800000665.mm.1	-6.38	T	Nedd4l	neural precursor cell expressed, developmentally down-regulated gene 4-like	Multiple_Complex	14.12	3.67e-07	5.75e-05			T
TC1400001470.mm.1	-2.77	T	Thoc7	THO complex 7 homolog (Drosophila); THO complex 7 homolog (Drosophila) (Thoc7), transcript variant 1, mRNA.; THO complex 7 homolog (Drosophila) (Thoc7), transcript variant 2, mRNA.	Multiple_Complex	14.12	0.0004	0.0101	Intron Retention	0.51	T
TC1900001428.mm.1	1.79	T	Pank1	pantothenate kinase 1	Coding	14.12	8.84e-05	0.0034			T
TC0200004920.mm.1	6.87	T	Dusp15	dual specificity phosphatase-like 15	Multiple_Complex	14.11	2.83e-10	3.89e-07	Cassette Exon	0.3	T
TC1200001485.mm.1	-6.75	T	Zfp125	zinc finger protein 125 [Source:MGI Symbol;Acc:MGI:1336211]	Coding	14.1	0.0003	0.0094			T
TC0100002541.mm.1	-3.76	T	Bard1	BRCA1 associated RING domain 1	Multiple_Complex	14.09	0.0003	0.0078			T
TC0100001703.mm.1	4.62	T	Cdc42bpa	CDC42 binding protein kinase alpha	Multiple_Complex	14.06	8.26e-05	0.0032			T
TC0900001695.mm.1	3.07	T	Gria4	glutamate receptor, ionotropic, AMPA4 (alpha 4)	Multiple_Complex	14.03	0.0001	0.0049	Cassette Exon	0.21	T
TC0800002819.mm.1	-1.11	T	Fhod1	formin homology 2 domain containing 1	Multiple_Complex	14.03	3.55e-05	0.0017			T
TC1300000445.mm.1	3.88	T	Bmp6	bone morphogenetic protein 6	Coding	14.02	0.001	0.0204			T
TC1300001764.mm.1	1.46	T	Serpinb1c	serine (or cysteine) peptidase inhibitor, clade B, member 1c	Coding	14.01	1.09e-05	0.0007			T
TC1800000301.mm.1	-9.25	T	Egr1	early growth response 1	Coding	13.99	3.29e-09	2.03e-06	Alternative 3' Acceptor Site	0.24	T
TC1100000965.mm.1	1.62	T	Kif1c; Mir6925	kinesin family member 1C; microRNA 6925; Synthetic construct Mus musculus clone IMAGE:100068089, MGC:195706 kinesin family member 1C (Kif1c) mRNA, encodes complete protein.	Multiple_Complex	13.97	5.21e-05	0.0023	Cassette Exon	0.2	T
TC0300001373.mm.1	2.37	T	Manba	mannosidase, beta A, lysosomal	Multiple_Complex	13.97	0.002	0.0331	Cassette Exon	0.26	T
TC0300002203.mm.1	9.27	T	Tmem144	transmembrane protein 144	Coding	13.96	0.0002	0.0053			T
TC1100000252.mm.1	-18.13	T			NonCoding	13.95	0.0005	0.0129			T
TC1800001107.mm.1	1.42	T	Rit2	Ras-like without CAAX 2	Multiple_Complex	13.93	0.0003	0.0081			T
TC0500003474.mm.1	-3.36	T	Taf6	TAF6 RNA polymerase II, TATA box binding protein (TBP)-associated factor	Multiple_Complex	13.93	3.5e-08	1.07e-05	Alternative 5' Donor Site	0.33	T
TC0X00000666.mm.1	1.06	T	Gabrq	gamma-aminobutyric acid (GABA) A receptor, subunit theta	Coding	13.93	0.0007	0.015			T
TC1100003646.mm.1	1.52	T	Srcin1	SRC kinase signaling inhibitor 1	Multiple_Complex	13.92	0.0032	0.0471			T
TC0200001786.mm.1	-1.23	T	Mapkbp1	mitogen-activated protein kinase binding protein 1	Multiple_Complex	13.92	0.0002	0.0064			T
TC1400000998.mm.1	1.2	T	Phyhip	phytanoyl-CoA hydroxylase interacting protein	Coding	13.91	0.0005	0.0122			T
TC0400001766.mm.1	-11.2	T	Rcc2	regulator of chromosome condensation 2	Multiple_Complex	13.91	5.89e-08	1.57e-05			T
TC1400001067.mm.1	-6.39	T	Nufip1	nuclear fragile X mental retardation protein interacting protein 1	Coding	13.91	0.0008	0.0165			T
TC1900000064.mm.1	1.93	T	4930481A15Rik	RIKEN cDNA 4930481A15 gene; RIKEN cDNA 4930481A15 gene (4930481A15Rik), transcript variant 1, non-coding RNA.; RIKEN cDNA 4930481A15 gene (4930481A15Rik), transcript variant 2, non-coding RNA.	Multiple_Complex	13.9	0.0014	0.0266	Alternative 5' Donor Site	0.25	T
TC1000002408.mm.1	-2.25	T	Pcbp3	poly(rC) binding protein 3	Multiple_Complex	13.9	1.92e-06	0.0002			T
TC1600001761.mm.1	-5.2	T	Cmss1	cms small ribosomal subunit 1	Multiple_Complex	13.9	2.28e-05	0.0012			T
TC0900000609.mm.1	-4.27	T	Ppp2r1b	protein phosphatase 2, regulatory subunit A, beta; protein phosphatase 2 (formerly 2A), regulatory subunit A (PR 65), beta isoform	Multiple_Complex	13.89	9.07e-06	0.0006			T
TC0900000966.mm.1	-17.07	T	Mns1	meiosis-specific nuclear structural protein 1	Coding	13.88	7.79e-08	1.92e-05			T
TC1100004289.mm.1	1.21	T	B3gnt2	UDP-GlcNAc:betaGal beta-1,3-N-acetylglucosaminyltransferase 2	Multiple_Complex	13.88	2.48e-05	0.0013			T
TC0700001192.mm.1	-39.9	T	Mex3b	mex3 homolog B (C. elegans)	Multiple_Complex	13.84	1.11e-07	2.45e-05	Cassette Exon	0.21	T
TC1500000014.mm.1	-1.01	T	C6	complement component 6	Multiple_Complex	13.82	7.04e-06	0.0005			T
TC1500000398.mm.1	-4.76	T	Mtbp	Mdm2, transformed 3T3 cell double minute p53 binding protein	Multiple_Complex	13.82	0.0002	0.0068			T
TC0700000033.mm.1	1.67	T	Eps8l1	EPS8-like 1; Synthetic construct Mus musculus clone IMAGE:100068366, MGC:195910 EPS8-like 1 (Eps8l1) mRNA, encodes complete protein.	Multiple_Complex	13.76	0.0002	0.0052			T
TC0700002173.mm.1	-13.66	T	Ube2s	ubiquitin-conjugating enzyme E2S	Coding	13.75	1.39e-07	2.88e-05			T
TC0100001717.mm.1	-2.53	T	Gm17275	predicted gene, 17275	NonCoding	13.73	3.96e-05	0.0019			T
TC0200002442.mm.1	-18.82	T	Fam83d	family with sequence similarity 83, member D	Multiple_Complex	13.73	2.84e-09	1.83e-06	Cassette Exon	0.23	T
TC0700001908.mm.1	1.15	T	Btbd16	BTB (POZ) domain containing 16	Coding	13.73	1.77e-06	0.0002	Cassette Exon	0.34	T
TC0500003590.mm.1	1.1	T	Ptcd1	pentatricopeptide repeat domain 1	Coding	13.72	6.45e-06	0.0005			T
TC1000002944.mm.1	-10.31	T	Nup107	nucleoporin 107	Coding	13.72	0.0002	0.0063			T
TC0X00002513.mm.1	1.34	T	Prrg1	proline rich Gla (G-carboxyglutamic acid) 1; proline rich Gla (G-carboxyglutamic acid) 1 (Prrg1), transcript variant 1, mRNA.	Multiple_Complex	13.7	0.0019	0.0326			T
TC1400000195.mm.1	-2.22	T	Kat6b	K(lysine) acetyltransferase 6B	Multiple_Complex	13.69	0.0014	0.0261			T
TC1800001227.mm.1	5.97	T	Pcdh1	protocadherin 1	Coding	13.68	0.0004	0.0104			T
TC1200000887.mm.1	1.08	T	Gm2042; Oog1	predicted gene 2042; oogenesin 1, mRNA (cDNA clone MGC:103249 IMAGE:30476881), complete cds.	Multiple_Complex	13.64	3.37e-05	0.0016			T
TC0200005462.mm.1	9.95	T	Entpd2	ectonucleoside triphosphate diphosphohydrolase 2	Multiple_Complex	13.63	0.0005	0.0121	Cassette Exon	0.26	T
TC0100002308.mm.1	-9.41	T	Myo1b	myosin IB	Multiple_Complex	13.63	2.17e-05	0.0012			T
TC1700002162.mm.1	11.9	T	Vegfa	vascular endothelial growth factor A	Multiple_Complex	13.62	1.57e-05	0.0009			T
TC0700001997.mm.1	7.22	T	Kndc1	kinase non-catalytic C-lobe domain (KIND) containing 1	Multiple_Complex	13.61	0.0014	0.0257			T
TC0600001281.mm.1	-1.38	T	Tsen2	tRNA splicing endonuclease 2 homolog (S. cerevisiae)	Multiple_Complex	13.61	6.24e-08	1.64e-05			T
TC0200000250.mm.1	-1.94	T	Cacnb2	calcium channel, voltage-dependent, beta 2 subunit; calcium channel, voltage-dependent, beta 2 subunit (Cacnb2), transcript variant 3, long non-coding RNA.	Multiple_Complex	13.6	0.0002	0.0059			T
TC0100001656.mm.1	-23.56	T	Exo1	exonuclease 1	Multiple_Complex	13.59	2.95e-06	0.0003			T
TC0100003869.mm.1	3.96	T	Tnni1	troponin I, skeletal, slow 1	Multiple_Complex	13.59	1.93e-07	3.63e-05	Cassette Exon	0.25	T
TC0100001365.mm.1	6.06	T	Colgalt2	collagen beta(1-O)galactosyltransferase 2	Coding	13.58	0.002	0.0337	Cassette Exon	0.32	T
TC1400002476.mm.1	-1.1	T	Dgkh	diacylglycerol kinase, eta; diacylglycerol kinase, eta (Dgkh), transcript variant 2, non-coding RNA.	Multiple_Complex	13.57	0.0006	0.0133			T
TC0400003537.mm.1	2.21	T	Ago3	argonaute RISC catalytic subunit 3	Multiple_Complex	13.57	0.002	0.0329			T
TC0100002832.mm.1	-10.06	T	Pask	PAS domain containing serine/threonine kinase	Multiple_Complex	13.56	1.25e-07	2.68e-05	Alternative 3' Acceptor Site	0.28	T
TC0200001918.mm.1	-1.18	T	Mrps5	mitochondrial ribosomal protein S5	Multiple_Complex	13.56	5.16e-07	7.37e-05	Alternative 5' Donor Site	0.34	T
TC0600001254.mm.1	-19	T	Fancd2	Fanconi anemia, complementation group D2	Multiple_Complex	13.56	2.89e-05	0.0015			T
TC0900003097.mm.1	1.16	T	3000002C10Rik	glyceraldehyde-3-phosphate dehydrogenase pseudogene	Multiple_Complex	13.56	0.0001	0.0039			T
TC0200005402.mm.1	1.3	T	Lama5	laminin, alpha 5	Multiple_Complex	13.55	0.003	0.0443			T
TC1700002152.mm.1	-1.95	T	Slc29a1	solute carrier family 29 (nucleoside transporters), member 1	Multiple_Complex	13.54	0.0004	0.0105			T
TC0200004598.mm.1	-34.64	T	Ckap2l	cytoskeleton associated protein 2-like	Multiple_Complex	13.54	0.0021	0.0342			T
TC0200003146.mm.1	2.82	T	Dpp7	dipeptidylpeptidase 7	Multiple_Complex	13.53	0.0004	0.0105			T
TC0200001036.mm.1	-14.38	T	Hat1	histone aminotransferase 1	Multiple_Complex	13.53	0.0011	0.0221			T
TC0X00001276.mm.1	-16.6	T	Cenpi	centromere protein I	Multiple_Complex	13.53	5.93e-07	8.15e-05			T
TC0400002434.mm.1	2.21	T	Ddx58	DEAD (Asp-Glu-Ala-Asp) box polypeptide 58; Synthetic construct Mus musculus clone IMAGE:100068109, MGC:195726 DEAD (Asp-Glu-Ala-Asp) box polypeptide 58 (Ddx58) mRNA, encodes complete protein.	Multiple_Complex	13.53	0.0017	0.0295	Cassette Exon	0.25	T
TC0200004816.mm.1	1.28	T	Cst3	cystatin C	Multiple_Complex	13.52	0.0003	0.0086	Alternative 5' Donor Site	0.36	T
TC1700001341.mm.1	-6.66	T	2700099C18Rik	NDC80 homolog, kinetochore complex component pseudogene	Multiple_Complex	13.52	7.23e-07	9.4e-05			T
TC0400004070.mm.1	-2.65	T	Park7	Parkinson disease (autosomal recessive, early onset) 7	Multiple_Complex	13.52	0.0017	0.0298	Alternative 5' Donor Site	0.27	T
TC0400000555.mm.1	1.18	T	Rnf20	ring finger protein 20	Multiple_Complex	13.51	0.0009	0.0186	Alternative 5' Donor Site	0.32	T
TC1800000827.mm.1	2.65	T	St8sia5	ST8 alpha-N-acetyl-neuraminide alpha-2,8-sialyltransferase 5	Coding	13.47	0.0006	0.014			T
TC0200001760.mm.1	-11.38	T	Rad51	RAD51 homolog	Multiple_Complex	13.46	0.0006	0.0138			T
TC1000000835.mm.1	1.67	T	Abca7	ATP-binding cassette, sub-family A (ABC1), member 7	Coding	13.46	3.89e-05	0.0018	Cassette Exon	0.35	T
TC1100003882.mm.1	-1.1	T	Nsf	N-ethylmaleimide sensitive fusion protein	Multiple_Complex	13.45	0.0002	0.0063	Alternative 3' Acceptor Site	0.3	T
TC0700001669.mm.1	-16.71	T	Pde3b	phosphodiesterase 3B, cGMP-inhibited	Multiple_Complex	13.45	2.41e-07	4.24e-05			T
TC0600001193.mm.1	2.32	T	Itpr1	inositol 1,4,5-trisphosphate receptor 1; Synthetic construct Mus musculus clone IMAGE:100069456, MGC:199358 inositol 1,4,5-triphosphate receptor 1 (Itpr1) mRNA, encodes complete protein.	Multiple_Complex	13.44	2.15e-05	0.0012			T
TC0300000269.mm.1	-4.77	T	Exosc9	exosome component 9	Multiple_Complex	13.4	0.0009	0.0191			T
TC0200000550.mm.1	-1.04	T	Hmcn2	hemicentin 2	Multiple_Complex	13.37	0.0005	0.0129			T
TC1800000063.mm.1	1.31	T	Colec12	collectin sub-family member 12	Coding	13.36	0.0007	0.0157			T
TC1000002248.mm.1	-13.87	T	H2afy2	H2A histone family, member Y2	Coding	13.35	1.58e-07	3.13e-05			T
TC1700001780.mm.1	1.19	T	Cpne5	copine V	Multiple_Complex	13.33	7.68e-06	0.0005			T
TC0X00002158.mm.1	4.55	T	Zdhhc9	zinc finger, DHHC domain containing 9	Multiple_Complex	13.32	1.38e-06	0.0002	Cassette Exon	0.35	T
TC0X00000075.mm.1	2.37	T	Slc35a2	solute carrier family 35 (UDP-galactose transporter), member A2	Multiple_Complex	13.32	2.6e-05	0.0014			T
TC0200003308.mm.1	-1.55	T	Cdk9; Mir2861; Mir3960	cyclin-dependent kinase 9 (CDC2-related kinase); microRNA 2861; microRNA 3960; microRNA 3960 (Mir3960), microRNA.	Multiple_Complex	13.31	8.45e-07	0.0001			T
TC1900001081.mm.1	3.95	T	Asrgl1	asparaginase like 1	Multiple_Complex	13.3	1.02e-05	0.0007	Alternative 5' Donor Site	0.28	T
TC1700001084.mm.1	-5.51	T	Ddx11	DEAD/H (Asp-Glu-Ala-Asp/His) box helicase 11	Coding	13.3	0.0009	0.0185			T
TC0500000809.mm.1	1.11	T	Prol1	proline rich, lacrimal 1	Coding	13.3	0.0013	0.0242			T
TC0200003697.mm.1	-12.32	T	Spc25	SPC25, NDC80 kinetochore complex component, homolog (S. cerevisiae)	Multiple_Complex	13.29	1.23e-06	0.0001			T
TC1300002093.mm.1	-20.36	T	Hnrnpa0	heterogeneous nuclear ribonucleoprotein A0	Multiple_Complex	13.27	1.12e-05	0.0007	Alternative 3' Acceptor Site	0.23	T
TC1700001933.mm.1	-9.84	T	1110038B12Rik; Snord52	RIKEN cDNA 1110038B12 gene; small nucleolar RNA, C/D box 52	Multiple_Complex	13.25	1.86e-07	3.54e-05	Alternative 3' Acceptor Site	0.23	T
TC0100001610.mm.1	-1	T	Igsf8	immunoglobulin superfamily, member 8	Multiple_Complex	13.24	1.65e-06	0.0002	Alternative 5' Donor Site	0.21	T
TC0400000335.mm.1	-59.84	T			NonCoding	13.19	9.27e-07	0.0001			T
TC0500000381.mm.1	4.15	T	Add1; Mir7036b	adducin 1 (alpha); microRNA 7036b	Multiple_Complex	13.18	3.76e-07	5.84e-05	Cassette Exon	0.53	T
TC0400001137.mm.1	1.51	T	0610037L13Rik	RIKEN cDNA 0610037L13 gene	Multiple_Complex	13.11	2.77e-05	0.0014			T
TC0900002428.mm.1	1.09	T	Thsd4	thrombospondin, type I, domain containing 4	Multiple_Complex	13.1	3.91e-06	0.0003			T
TC1200000415.mm.1	-8.18	T	G2e3	G2/M-phase specific E3 ubiquitin ligase	Multiple_Complex	13.1	6.85e-08	1.75e-05			T
TC0900002478.mm.1	-1.12	T	Iqch	IQ motif containing H	Multiple_Complex	13.09	1.58e-06	0.0002			T
TC1800000785.mm.1	21.46	T	Gm9925	predicted gene 9925 [Source:MGI Symbol;Acc:MGI:3641738]	Multiple_Complex	13.06	0.0012	0.0229			T
TC0500003171.mm.1	2.91	T	Rita1	RBPJ interacting and tubulin associated 1	Multiple_Complex	13.05	0.0009	0.0191	Cassette Exon	0.27	T
TC1700002240.mm.1	117.36	T	Daam2	dishevelled associated activator of morphogenesis 2	Coding	13.04	0.0005	0.0114			T
TC1700000623.mm.1	1.32	T	Tap2	transporter 2, ATP-binding cassette, sub-family B (MDR/TAP)	Multiple_Complex	13.04	0.0003	0.0079			T
TC0X00001381.mm.1	-1.15	T			NonCoding	13.03	0.0001	0.0042			T
TC0800001472.mm.1	-13.8	T	Gm20269	PREDICTED: predicted gene, 20269 (Gm20269), miscRNA.	NonCoding	13.02	0.0018	0.0312			T
TC1700001241.mm.1	-2.79	T	Eml4	echinoderm microtubule associated protein like 4	Multiple_Complex	13.01	0.0003	0.0088	Alternative 3' Acceptor Site	0.29	T
TC1100002429.mm.1	10.52	T	Sptbn1	spectrin beta, non-erythrocytic 1	Multiple_Complex	13.01	8.93e-05	0.0034			T
TC0700001122.mm.1	-8.05	T	Fanci	Fanconi anemia, complementation group I	Coding	12.99	9.96e-05	0.0037			T
TC0100001616.mm.1	-7.34	T	Igsf9	immunoglobulin superfamily, member 9	Multiple_Complex	12.99	2.24e-06	0.0002			T
TC1900000119.mm.1	2.17	T	Nrxn2	neurexin II	Multiple_Complex	12.98	0.0002	0.0066			T
TC1900001089.mm.1	-15.95	T	Incenp	inner centromere protein	Multiple_Complex	12.98	2.87e-05	0.0015			T
TC1000002236.mm.1	21.43	T	Unc5b	unc-5 homolog B (C. elegans)	Multiple_Complex	12.98	0.0002	0.0057			T
TC1000002520.mm.1	4.31	T	Gng7	guanine nucleotide binding protein (G protein), gamma 7	Coding	12.96	1.54e-06	0.0002			T
TC1300001096.mm.1	4.66	T	Gcnt4	glucosaminyl (N-acetyl) transferase 4, core 2 (beta-1,6-N-acetylglucosaminyltransferase)	Coding	12.95	3.96e-05	0.0019	Cassette Exon	0.26	T
TC1500000666.mm.1	6.47	T	Micall1	microtubule associated monooxygenase, calponin and LIM domain containing -like 1; microtubule associated monoxygenase, calponin and LIM domain containing -like 1 (Micall1), mRNA.	Coding	12.93	0.0002	0.0055			T
TC0300002709.mm.1	16.27	T	Kcnc4	potassium voltage gated channel, Shaw-related subfamily, member 4	Coding	12.92	4.77e-11	1.28e-07			T
TC0400004055.mm.1	1.89	T	Spsb1	splA/ryanodine receptor domain and SOCS box containing 1	Multiple_Complex	12.92	4.97e-07	7.17e-05	Alternative 5' Donor Site	0.3	T
TC0900003218.mm.1	1.12	T	Zcwpw2	zinc finger, CW type with PWWP domain 2	Multiple_Complex	12.89	1.38e-05	0.0008	Cassette Exon	0.25	T
TC0200000522.mm.1	-9.03	T	Set	SET nuclear oncogene	Multiple_Complex	12.89	7.37e-08	1.85e-05			T
TC1200000348.mm.1	-1.47	T	Etv1	ets variant 1; ets variant gene 1	Multiple_Complex	12.88	2.3e-05	0.0012	Alternative 5' Donor Site	0.21	T
TC1000002249.mm.1	1.03	T	Col13a1	collagen, type XIII, alpha 1	Multiple_Complex	12.87	2.21e-08	7.69e-06	Cassette Exon	0.21	T
TC0700001706.mm.1	1.15	T	Iqck	IQ motif containing K	Multiple_Complex	12.87	1.73e-08	6.41e-06	Alternative 5' Donor Site	0.2	T
TC0900000540.mm.1	-12.18	T	Fxyd6	FXYD domain-containing ion transport regulator 6	Multiple_Complex	12.85	2.83e-07	4.76e-05	Cassette Exon	0.21	T
TC1100000244.mm.1	-1.65	T	1700030C12Rik	RIKEN cDNA 1700030C12 gene	NonCoding	12.84	0.0031	0.0461			T
TC1900000027.mm.1	1.62	T	Pitpnm1	phosphatidylinositol transfer protein, membrane-associated 1	Multiple_Complex	12.83	4.54e-05	0.0021	Alternative 5' Donor Site	0.26	T
TC0400001523.mm.1	-1.1	T	Bsdc1	BSD domain containing 1	Multiple_Complex	12.82	0.0013	0.0246			T
TC0600002436.mm.1	-9.36	T			NonCoding	12.82	2.23e-06	0.0002			T
TC1500000731.mm.1	2.87	T	Tef	thyrotroph embryonic factor	Multiple_Complex	12.8	0.0006	0.0145	Cassette Exon	0.34	T
TC0500003215.mm.1	-1.05	T	Ift81	intraflagellar transport 81	Multiple_Complex	12.79	0.0001	0.004	Cassette Exon	0.33	T
TC0200003014.mm.1	28.43	T			NonCoding	12.78	8.78e-07	0.0001			T
TC1400002151.mm.1	3.39	T	Zdhhc20	zinc finger, DHHC domain containing 20	Multiple_Complex	12.78	0.0003	0.0092			T
TC1400000322.mm.1	-29.99	T	Nt5dc2	5-nucleotidase domain containing 2; 5'-nucleotidase domain containing 2	Coding	12.78	5.15e-05	0.0023	Cassette Exon	0.21	T
TC0900001633.mm.1	21.33	T	Fam198a	family with sequence similarity 198, member A	Coding	12.78	6.07e-07	8.28e-05			T
TC1200001030.mm.1	4.38	T	Ifi27	interferon, alpha-inducible protein 27	Multiple_Complex	12.77	3.73e-06	0.0003	Cassette Exon	0.35	T
TC1100000033.mm.1	-1.04	T	Sec14l3	SEC14-like lipid binding 3; SEC14-like 3 (S. cerevisiae)	Multiple_Complex	12.76	8.11e-06	0.0006			T
TC0200000714.mm.1	6.7	T	Olfml2a	olfactomedin-like 2A	Multiple_Complex	12.74	0.0005	0.0129	Cassette Exon	0.26	T
TC1000001203.mm.1	-6.43	T	Poc1b	POC1 centriolar protein homolog B (Chlamydomonas)	Multiple_Complex	12.73	2.42e-06	0.0002			T
TC1500002249.mm.1	1.14	T	Cela1	chymotrypsin-like elastase family, member 1	Coding	12.73	3.23e-07	5.25e-05			T
TC0600001292.mm.1	-54.37	T	Gm8203	predicted pseudogene 8203	Multiple_Complex	12.72	1.51e-05	0.0009			T
TC0900002296.mm.1	-6.62	T	Zc3h12c	zinc finger CCCH type containing 12C	Multiple_Complex	12.72	0.0012	0.0233			T
TC1300001819.mm.1	-1.02	T			NonCoding	12.72	6.29e-07	8.5e-05			T
TC1800001063.mm.1	-4.7	T	Nol4	nucleolar protein 4	Multiple_Complex	12.7	0.0004	0.0098			T
TC0100001862.mm.1	1.23	T	Gm10516	predicted gene 10516	NonCoding	12.7	1.91e-05	0.0011			T
TC0800001727.mm.1	-1.77	T	Pcid2	PCI domain containing 2	Multiple_Complex	12.67	0.0011	0.0214			T
TC1500000053.mm.1	-9.35	T	Nup155	nucleoporin 155	Multiple_Complex	12.65	5.06e-05	0.0022	Alternative 3' Acceptor Site	0.24	T
TC0100000044.mm.1	2.69	T	Sgk3	serum/glucocorticoid regulated kinase 3	Multiple_Complex	12.64	0.0005	0.0131			T
TC0500001940.mm.1	-32.72	T	Gm7332	predicted gene 7332	Multiple_Complex	12.63	8.73e-10	8.29e-07	Alternative 3' Acceptor Site	0.23	T
TC0300001074.mm.1	1.01	T			NonCoding	12.63	0.0002	0.0068			T
TC0300003210.mm.1	1.6	T	Schip1; Gm21949	schwannomin interacting protein 1; predicted gene, 21949	Multiple_Complex	12.63	0.0027	0.0416			T
TC1500002067.mm.1	-1.82	T	Cpne8	copine VIII	Multiple_Complex	12.56	4.79e-05	0.0021			T
TC0600000103.mm.1	-1.32	T	Foxp2	forkhead box P2	Multiple_Complex	12.56	5.73e-05	0.0025			T
TC1300002001.mm.1	29.46	T	Gm15440	predicted gene 15440 [Source:MGI Symbol;Acc:MGI:3642353]	Coding	12.55	1.18e-05	0.0008			T
TC1900000333.mm.1	1.61	T	E030003E18Rik	RIKEN cDNA E030003E18 gene; RIKEN cDNA E030003E18 gene (E030003E18Rik), non-coding RNA.	NonCoding	12.54	2.7e-05	0.0014			T
TC1500001095.mm.1	-20.79	T	Espl1	extra spindle pole bodies 1, separase; extra spindle poles-like 1 (S. cerevisiae)	Coding	12.52	1.29e-05	0.0008	Cassette Exon	0.23	T
TC1300001094.mm.1	-1.04	T			NonCoding	12.5	0.0019	0.0324			T
TC1500001509.mm.1	-9.49	T	Gm10020	predicted pseudogene 10020	Multiple_Complex	12.5	9.56e-05	0.0036			T
TC1100000983.mm.1	-13.13	T	Fam64a	family with sequence similarity 64, member A	Multiple_Complex	12.49	1.29e-09	1.06e-06			T
TC0900001587.mm.1	-1.07	T	Ttc21a	tetratricopeptide repeat domain 21A	Multiple_Complex	12.48	1.63e-06	0.0002			T
TC0600002265.mm.1	-2.29	T	Hnrnpa2b1	heterogeneous nuclear ribonucleoprotein A2/B1; heterogeneous nuclear ribonucleoprotein A2/B1 (Hnrnpa2b1), transcript variant 1, mRNA.	Multiple_Complex	12.48	0.0017	0.0298	Cassette Exon	0.26	T
TC1800000092.mm.1	-12.43	T	Rbbp8	retinoblastoma binding protein 8	Multiple_Complex	12.48	6.81e-08	1.74e-05			T
TC1000001830.mm.1	5.82	T	Pde7b	phosphodiesterase 7B	Multiple_Complex	12.48	1.39e-06	0.0002			T
TC0800000814.mm.1	-9.49	T	Tpm4	tropomyosin 4	Multiple_Complex	12.47	0.0005	0.0124			T
TC0800000759.mm.1	-8.56	T	Lsm4	LSM4 homolog, U6 small nuclear RNA associated (S. cerevisiae)	Multiple_Complex	12.45	8.34e-07	0.0001	Alternative 3' Acceptor Site	0.23	T
TC0400002494.mm.1	1.85	T	Gm13305; Gm2002; Il11ra2	predicted gene 13305 (Gm13305), mRNA.; predicted gene 2002; interleukin 11 receptor, alpha chain 2 (Il11ra2), mRNA.; predicted gene 13305; interleukin 11 receptor, alpha chain 2	Multiple_Complex	12.45	9.43e-06	0.0006	Cassette Exon	0.3	T
TC1300000691.mm.1	3.23	T	Tgfbi	transforming growth factor, beta induced	Coding	12.45	5.36e-05	0.0023	Alternative 5' Donor Site	0.27	T
TC0900001009.mm.1	-2.32	T	Myo5a	myosin VA	Multiple_Complex	12.45	0.0005	0.0119	Cassette Exon	0.25	T
TC0200002367.mm.1	3.55	T	Acss2	acyl-CoA synthetase short-chain family member 2	Multiple_Complex	12.44	0.0009	0.0191			T
TC0200000365.mm.1	-1.24	T	4931423N10Rik	RIKEN cDNA 4931423N10 gene	Coding	12.44	1.79e-05	0.001			T
TC1900001710.mm.1	2.45	T	Afap1l2	actin filament associated protein 1-like 2	Multiple_Complex	12.35	0.0003	0.0085	Cassette Exon	0.32	T
TC1100003640.mm.1	-6	T	Kpnb1	karyopherin (importin) beta 1	Multiple_Complex	12.34	4.95e-06	0.0004			T
TC0300000778.mm.1	-1.12	T	Tpm3	tropomyosin 3, gamma	Multiple_Complex	12.33	0.0004	0.0109			T
TC0700002749.mm.1	-6.88	T	Wdr62	WD repeat domain 62	Multiple_Complex	12.32	0.0006	0.0138			T
TC0700004191.mm.1	-1.04	T	Dnah3	dynein, axonemal, heavy chain 3	Coding	12.32	2.37e-08	8.07e-06			T
TC1700000426.mm.1	1.95	T	Phf1	PHD finger protein 1; Synthetic construct Mus musculus clone IMAGE:100064098, MGC:193469 PHD finger protein 1 (Phf1) mRNA, encodes complete protein.	Multiple_Complex	12.31	0.0013	0.0251			T
TC0400000057.mm.1	-11.07	T	Chd7	chromodomain helicase DNA binding protein 7; chromodomain helicase DNA binding protein 7 (Chd7), mRNA.	Multiple_Complex	12.3	1.4e-08	5.49e-06	Cassette Exon	0.23	T
TC0800000403.mm.1	5.33	T	Saraf	store-operated calcium entry-associated regulatory factor	Coding	12.3	0.0002	0.0055			T
TC1400001246.mm.1	-10.69	T	Mir17hg; Mir18; Mir20a; Mir17; Mir19a; Mir19b-1; Mir92-1	Mir17 host gene (non-protein coding); microRNA 18; microRNA 20a; microRNA 17; microRNA 19a; microRNA 19b-1; microRNA 92-1; Mir17 host gene 1 (non-protein coding); microRNA host gene 1 (non-protein coding)	Multiple_Complex	12.24	3.92e-05	0.0018			T
TC1500001005.mm.1	-19.71	T	Troap	trophinin associated protein	Coding	12.24	1.12e-06	0.0001			T
TC0700002968.mm.1	-9.24	T	Pold1	polymerase (DNA directed), delta 1, catalytic subunit	Multiple_Complex	12.23	7.37e-07	9.54e-05	Intron Retention	0.39	T
TC0300002071.mm.1	-2.73	T	Plch1	phospholipase C, eta 1; phospholipase C, eta 1 (Plch1), transcript variant 1, mRNA.	Multiple_Complex	12.22	2.48e-05	0.0013			T
TC0100000637.mm.1	18.31	T	Plcd4	phospholipase C, delta 4	Multiple_Complex	12.22	0.0002	0.006			T
TC1400002515.mm.1	-12.2	T	Diaph3	diaphanous related formin 3	Multiple_Complex	12.21	1.49e-06	0.0002			T
TC1200001925.mm.1	-1.15	T	Gm20246	PREDICTED: predicted gene, 20246, transcript variant 1 (Gm20246), miscRNA.; PREDICTED: predicted gene, 20246, transcript variant 2 (Gm20246), miscRNA.	NonCoding	12.2	0.0018	0.0316			T
TC1400001456.mm.1	-2.1	T	Cadps	Ca2+-dependent secretion activator	Coding	12.19	3.01e-05	0.0015			T
TC1600000221.mm.1	-1.75	T	Smpd4	sphingomyelin phosphodiesterase 4	Multiple_Complex	12.19	0.001	0.0206			T
TC0200000393.mm.1	8.68	T	Pnpla7	patatin-like phospholipase domain containing 7	Multiple_Complex	12.18	5.26e-05	0.0023			T
TC0200000574.mm.1	1.28	T	Golga2	golgi autoantigen, golgin subfamily a, 2	Multiple_Complex	12.18	0.0002	0.0055			T
TC0400004170.mm.1	3.01	T	Agrn	agrin	Multiple_Complex	12.17	4.73e-05	0.0021	Intron Retention	0.39	T
TC0400002709.mm.1	1.13	T	Tmem245	transmembrane protein 245	Multiple_Complex	12.17	0.0002	0.0052			T
TC0X00000685.mm.1	-7.15	T	Bgn	biglycan	Multiple_Complex	12.16	7.48e-05	0.003	Cassette Exon	0.25	T
TC0400003422.mm.1	-8.08	T	Ppih	peptidyl prolyl isomerase H	Coding	12.16	0.0004	0.01			T
TC0400003437.mm.1	-4.8	T	Ctps	cytidine 5-triphosphate synthase; cytidine 5'-triphosphate synthase	Multiple_Complex	12.15	3.56e-05	0.0017			T
TC0800001568.mm.1	1.19	T			NonCoding	12.14	1.58e-06	0.0002			T
TC0900003115.mm.1	2.11	T	Nbeal2; Mir8107	neurobeachin-like 2; microRNA 8107	Multiple_Complex	12.13	0.0004	0.0098	Cassette Exon	0.29	T
TC0300003212.mm.1	-2.24	T	Gon4l	gon-4-like (C.elegans)	Multiple_Complex	12.11	0.0029	0.044	Intron Retention	0.49	T
TC1200001127.mm.1	1.75	T	Meg3; Mir770; Mir1906-1; Mir1906-2	maternally expressed 3; microRNA 770; microRNA 1906-1; microRNA 1906-2	Multiple_Complex	12.1	0.0016	0.0281	Cassette Exon	0.2	T
TC0500000597.mm.1	27.15	T	C030018K13Rik	RIKEN cDNA C030018K13 gene; RIKEN cDNA C030018K13 gene (C030018K13Rik), transcript variant 1, non-coding RNA.; RIKEN cDNA C030018K13 gene (C030018K13Rik), transcript variant 2, non-coding RNA.; RIKEN cDNA C030018K13 gene (C030018K13Rik), transcript variant 3, non-coding RNA.	NonCoding	12.09	8.5e-09	3.92e-06	Cassette Exon	0.28	T
TC0500000598.mm.1	3.44	T			NonCoding	12.09	9.07e-05	0.0035	Cassette Exon	0.25	T
TC0300000888.mm.1	-4.54	T	Vps72	vacuolar protein sorting 72 (yeast)	Multiple_Complex	12.07	0.0002	0.0052			T
TC1600000179.mm.1	-1.08	T	Abcc1	ATP-binding cassette, sub-family C (CFTR/MRP), member 1	Multiple_Complex	12.06	0.0004	0.01			T
TC1500001296.mm.1	1.54	T			NonCoding	12.01	0.0002	0.0051	Alternative 3' Acceptor Site	0.27	T
TC0300001242.mm.1	-1	T	Abca4	ATP-binding cassette, sub-family A (ABC1), member 4	Multiple_Complex	12.01	1.37e-06	0.0002			T
TC0300002901.mm.1	6.68	T	Ank2	ankyrin 2, brain	Multiple_Complex	12.01	0.0029	0.0438			T
TC0800000704.mm.1	1.36	T	Ints10	integrator complex subunit 10	Multiple_Complex	12.01	0.0005	0.0119	Alternative 5' Donor Site	0.31	T
TC0400003327.mm.1	1.69	T	Faah	fatty acid amide hydrolase	Multiple_Complex	12	0.0006	0.0148	Cassette Exon	0.31	T
TC0400000485.mm.1	6.29	T	Frmpd1	FERM and PDZ domain containing 1	Coding	11.98	0.0004	0.0106			T
TC0200000480.mm.1	-1.14	T	Olfm1	olfactomedin 1	Multiple_Complex	11.97	1.32e-07	2.78e-05			T
TC0300000959.mm.1	1.06	T	Gja5	gap junction protein, alpha 5	Coding	11.96	4.37e-08	1.25e-05			T
TC1500000407.mm.1	-11.59	T	Tbc1d31	TBC1 domain family, member 31	Multiple_Complex	11.94	0.0003	0.0079			T
TC1300002279.mm.1	-24.87	T	Ube2ql1	ubiquitin-conjugating enzyme E2Q family-like 1	Multiple_Complex	11.94	7.22e-10	7.26e-07			T
TC0700000466.mm.1	-9.7	T	Ttc9b	tetratricopeptide repeat domain 9B	Coding	11.93	4.84e-06	0.0004	Cassette Exon	0.24	T
TC1700000496.mm.1	-11.49	T	Cdkn1a	cyclin-dependent kinase inhibitor 1A (P21)	Coding	11.92	4.41e-07	6.58e-05	Alternative 3' Acceptor Site	0.22	T
TC0700002876.mm.1	-13.04	T	Ccne1	cyclin E1	Multiple_Complex	11.9	4.4e-07	6.57e-05			T
TC1900000409.mm.1	2.03	T	Smarca2	SWI/SNF related, matrix associated, actin dependent regulator of chromatin, subfamily a, member 2	Multiple_Complex	11.9	0.0032	0.047			T
TC0700004320.mm.1	-29.66	T	Dctpp1	dCTP pyrophosphatase 1	Coding	11.89	1.21e-05	0.0008	Alternative 3' Acceptor Site	0.23	T
TC0800002113.mm.1	3.29	T	Mtus1	mitochondrial tumor suppressor 1	Multiple_Complex	11.88	6.26e-05	0.0026			T
TC0700003005.mm.1	-6.22	T	Ruvbl2	RuvB-like protein 2	Coding	11.88	0.0013	0.0241			T
TC0100000282.mm.1	10.54	T	Npas2	neuronal PAS domain protein 2	Multiple_Complex	11.88	4.28e-05	0.002	Cassette Exon	0.21	T
TC0500002095.mm.1	1.07	T	Prkag2	protein kinase, AMP-activated, gamma 2 non-catalytic subunit	Multiple_Complex	11.86	0.0025	0.0397			T
TC0800001358.mm.1	1.78	T	Nudt7	nudix (nucleoside diphosphate linked moiety X)-type motif 7	Coding	11.86	0.0007	0.0158	Cassette Exon	0.27	T
TC1700001876.mm.1	-1.34	T	Rab11b	RAB11B, member RAS oncogene family	Multiple_Complex	11.86	0.0004	0.0098			T
TC0X00000652.mm.1	-8.4	T	Hmgb3	high mobility group box 3	Multiple_Complex	11.85	2.86e-05	0.0015			T
TC0100002136.mm.1	-14.71	T	Prim2	DNA primase, p58 subunit	Multiple_Complex	11.85	3.37e-05	0.0016	Cassette Exon	0.23	T
TC1100004062.mm.1	176.45	T	Grin2c	glutamate receptor, ionotropic, NMDA2C (epsilon 3)	Coding	11.85	0.0002	0.0066			T
TC0400003343.mm.1	-12.28	T	Nasp	nuclear autoantigenic sperm protein (histone-binding)	Multiple_Complex	11.83	7.45e-05	0.003			T
TC0100002228.mm.1	1.08	T	Lonrf2	LON peptidase N-terminal domain and ring finger 2	Multiple_Complex	11.82	0.0016	0.0285	Cassette Exon	0.27	T
TC1400001730.mm.1	1.67	T	Ldb3	LIM domain binding 3	Multiple_Complex	11.81	0.0009	0.0182			T
TC0900000223.mm.1	-1.15	T	Bbs9	Bardet-Biedl syndrome 9 (human)	Multiple_Complex	11.8	0.0035	0.0499			T
TC0200003096.mm.1	1.48	T	A130006I12Rik	RIKEN cDNA A130006I12 gene [Source:MGI Symbol;Acc:MGI:2441774]	Multiple_Complex	11.79	7.64e-05	0.003	Alternative 5' Donor Site	0.27	T
TC0100001943.mm.1	-12.63	T	Mybl1	myeloblastosis oncogene-like 1	Multiple_Complex	11.78	8.92e-10	8.34e-07			T
TC0400000435.mm.1	2.17	T	Rusc2	RUN and SH3 domain containing 2	Multiple_Complex	11.78	1.55e-06	0.0002	Alternative 5' Donor Site	0.27	T
TC0900000200.mm.1	-3.79	T	Carm1	coactivator-associated arginine methyltransferase 1	Multiple_Complex	11.77	1.29e-05	0.0008			T
TC1400000766.mm.1	11.38	T			NonCoding	11.77	0.0003	0.008			T
TC1100003299.mm.1	-2.29	T	Tnfaip1	tumor necrosis factor, alpha-induced protein 1 (endothelial)	Coding	11.74	5.59e-05	0.0024			T
TC0100001254.mm.1	1.86	T	Phlda3	pleckstrin homology-like domain, family A, member 3	Multiple_Complex	11.74	3.21e-07	5.22e-05			T
TC0700000050.mm.1	-1.27	T	Ssc5d	scavenger receptor cysteine rich family, 5 domains; scavenger receptor cysteine rich domain containing (5 domains)	Coding	11.74	9.06e-07	0.0001			T
TC0200002530.mm.1	-1.47	T	Dnttip1	deoxynucleotidyltransferase, terminal, interacting protein 1	Multiple_Complex	11.73	5.06e-05	0.0022	Cassette Exon	0.23	T
TC0800003157.mm.1	1.49	T			NonCoding	11.72	0.0007	0.0164			T
TC1000001044.mm.1	16.63	T	Timp3	tissue inhibitor of metalloproteinase 3	Multiple_Complex	11.72	0.0003	0.0081			T
TC0600000980.mm.1	4.36	T	Tgfa	transforming growth factor alpha	Multiple_Complex	11.71	1.21e-06	0.0001	Cassette Exon	0.26	T
TC0500003470.mm.1	-1.54	T	Zfp113	zinc finger protein 113	Multiple_Complex	11.71	0.0015	0.027	Cassette Exon	0.23	T
TC1700002438.mm.1	4.82	T	Ptprm	protein tyrosine phosphatase, receptor type, M	Multiple_Complex	11.69	0.0001	0.0038			T
TC0800002758.mm.1	-1.8	T	Got2	glutamatic-oxaloacetic transaminase 2, mitochondrial; glutamate oxaloacetate transaminase 2, mitochondrial	Multiple_Complex	11.68	0.0021	0.0341	Alternative 3' Acceptor Site	0.34	T
TC1400002140.mm.1	3	T	Gm4491	predicted gene 4491 [Source:MGI Symbol;Acc:MGI:3782676]	Coding	11.67	9.83e-10	8.91e-07			T
TC0200000215.mm.1	28.35	T	Gm13293	predicted gene 13293	NonCoding	11.66	3.54e-07	5.61e-05			T
TC1700002359.mm.1	1.96	T	Pdzph1	PDZ and pleckstrin homology domains 1	Multiple_Complex	11.66	1.63e-05	0.001			T
TC0200000395.mm.1	7.19	T	Nsmf	NMDA receptor synaptonuclear signaling and neuronal migration factor	Multiple_Complex	11.64	0.0002	0.0066			T
TC1500001002.mm.1	-10.29	T	Tuba1c	tubulin, alpha 1C	Coding	11.62	6.12e-11	1.48e-07	Alternative 3' Acceptor Site	0.23	T
TC0200001552.mm.1	5.67	T	Cd59a	CD59a antigen	Multiple_Complex	11.6	0.0007	0.016	Cassette Exon	0.24	T
TC1800001138.mm.1	-2.04	T	Stard4	StAR-related lipid transfer (START) domain containing 4	Multiple_Complex	11.59	0.0025	0.0388			T
TC0X00003075.mm.1	2.78	T	Tsc22d3	TSC22 domain family, member 3	Multiple_Complex	11.59	2.24e-06	0.0002			T
TC0700002061.mm.1	-1.06	T	Muc2; MUC2	mucin 2; colonic mucin MUC2 (MUC2) mRNA, partial cds.; SubName: Full=Uncharacterized protein; Flags: Fragment;	Multiple_Complex	11.59	5.92e-06	0.0005			T
TC0300002860.mm.1	-6.73	T	Fnbp1l; Mir7657	formin binding protein 1-like; microRNA 7657	Multiple_Complex	11.58	2.26e-06	0.0002			T
TC0600000016.mm.1	1.05	T	Ppp1r9a	protein phosphatase 1, regulatory (inhibitor) subunit 9A	Multiple_Complex	11.58	0.0005	0.0115			T
TC0300000765.mm.1	5.55	T	Pbxip1	pre B cell leukemia transcription factor interacting protein 1	Multiple_Complex	11.58	4.16e-06	0.0003	Cassette Exon	0.26	T
TC1300002197.mm.1	-6.81	T	Zfp367	zinc finger protein 367	Multiple_Complex	11.58	8.78e-07	0.0001			T
TC1300002302.mm.1	-1.2	T	Slc6a18	solute carrier family 6 (neurotransmitter transporter), member 18	Coding	11.57	1.08e-07	2.41e-05			T
TC0200001829.mm.1	-3.12	T	Ctdspl2	CTD (carboxy-terminal domain, RNA polymerase II, polypeptide A) small phosphatase like 2	Multiple_Complex	11.57	0.0003	0.0085			T
TC1900000981.mm.1	-2.13	T	Sssca1; Fam89b	Sjogrens syndrome/scleroderma autoantigen 1 homolog (human); family with sequence similarity 89, member B; Sjogren's syndrome/scleroderma autoantigen 1 homolog (human); family with sequence similarity 89, member B (Fam89b), transcript variant 1, mRNA.	Multiple_Complex	11.56	1.27e-05	0.0008			T
TC0300000935.mm.1	-21.51	T	Hist2h2bb	histone cluster 2, H2bb	Coding	11.56	2.22e-05	0.0012			T
TC0700004221.mm.1	-5.9	T	Gga2	golgi associated, gamma adaptin ear containing, ARF binding protein 2	Multiple_Complex	11.56	7.06e-06	0.0005			T
TC0700001210.mm.1	8.85	T	Gm2115	predicted gene 2115	NonCoding	11.56	0.0002	0.0055			T
TC0700000558.mm.1	1.46	T	Alkbh6	alkB, alkylation repair homolog 6 (E. coli)	Multiple_Complex	11.54	0.0002	0.0067			T
TC1700002050.mm.1	206.84	T	Mog	myelin oligodendrocyte glycoprotein	Multiple_Complex	11.53	0.0003	0.0089			T
TC1900000428.mm.1	7.47	T	Cdc37l1	cell division cycle 37-like 1	Multiple_Complex	11.53	0.0034	0.0483			T
TC1400001533.mm.1	-13.59	T	Dnajc9	DnaJ (Hsp40) homolog, subfamily C, member 9	Coding	11.52	9.31e-08	2.18e-05			T
TC0200005092.mm.1	-1.1	T	Hnf4aos	hepatic nuclear factor 4 alpha, opposite strand	Multiple_Complex	11.51	2.86e-05	0.0015			T
TC1300002357.mm.1	-7.37	T	Adgrv1	adhesion G protein-coupled receptor V1	Multiple_Complex	11.51	0.0013	0.0252			T
TC1700001459.mm.1	1.69	T	Acat2	acetyl-Coenzyme A acetyltransferase 2	Multiple_Complex	11.51	4.47e-05	0.002	Cassette Exon	0.27	T
TC0400003890.mm.1	1.21	T	Ddi2; Rsc1a1	DNA-damage inducible protein 2; regulatory solute carrier protein, family 1, member 1	Multiple_Complex	11.49	0.0013	0.0244	Alternative 3' Acceptor Site	0.23	T
TC1300001954.mm.1	5.07	T	1110007C09Rik	RIKEN cDNA 1110007C09 gene	Coding	11.49	9.2e-06	0.0006			T
TC0700001581.mm.1	19.46	T	Ppfibp2	PTPRF interacting protein, binding protein 2 (liprin beta 2)	Coding	11.49	0.0002	0.0051			T
TC1100000725.mm.1	1.4	T	4933439C10Rik	RIKEN cDNA 4933439C10 gene	NonCoding	11.49	0.0005	0.0125	Alternative 5' Donor Site	0.23	T
TC1200000989.mm.1	1.57	T	Kcnk13	potassium channel, subfamily K, member 13	Coding	11.48	7.29e-05	0.0029			T
TC1100003898.mm.1	-3.08	T	Cdc27	cell division cycle 27; Synthetic construct Mus musculus clone IMAGE:100063889, MGC:193356 cell division cycle 27 homolog (S. cerevisiae) (Cdc27) mRNA, encodes complete protein.	Multiple_Complex	11.47	0.0003	0.0085			T
TC1000001768.mm.1	2.17	T	Phactr2	phosphatase and actin regulator 2	Multiple_Complex	11.47	3.89e-05	0.0018			T
TC1300000618.mm.1	-1.1	T	Gm2762	predicted gene 2762; predicted gene 2762 (Gm2762), non-coding RNA.	NonCoding	11.46	0.0033	0.0481			T
TC0200001042.mm.1	-7.95	T	Dlx1	distal-less homeobox 1	Multiple_Complex	11.46	0.0001	0.0049			T
TC1100003934.mm.1	-3.84	T	Polg2	polymerase (DNA directed), gamma 2, accessory subunit	Multiple_Complex	11.46	0.0034	0.049			T
TC0700004153.mm.1	1.82	T	Plekha7	pleckstrin homology domain containing, family A member 7	Multiple_Complex	11.45	0.0003	0.0082			T
TC0100003374.mm.1	8.2	T	Prdx6	peroxiredoxin 6	Multiple_Complex	11.44	1.96e-05	0.0011	Cassette Exon	0.47	T
TC0700000864.mm.1	1.14	T	Lmtk3	lemur tyrosine kinase 3	Multiple_Complex	11.44	1.86e-05	0.0011			T
TC1400002099.mm.1	2.33	T	Rabggta	Rab geranylgeranyl transferase, a subunit	Coding	11.43	2.81e-05	0.0014			T
TC1900000448.mm.1	258.69	T	Il33	interleukin 33	Multiple_Complex	11.42	3.67e-07	5.75e-05	Cassette Exon	0.23	T
TC1800000682.mm.1	11.92	T	Sec11c	SEC11 homolog C, signal peptidase complex subunit; SEC11 homolog C (S. cerevisiae)	Multiple_Complex	11.38	5.16e-05	0.0023	Cassette Exon	0.29	T
TC0600003433.mm.1	10.43	T	Itpr2	inositol 1,4,5-triphosphate receptor 2; inositol 1,4,5-triphosphate receptor 2 (Itpr2), transcript variant 2, mRNA.	Multiple_Complex	11.37	0.0001	0.0045	Cassette Exon	0.24	T
TC0700002311.mm.1	-20.45	T	Zik1	zinc finger protein interacting with K protein 1	Multiple_Complex	11.37	0.0002	0.0055	Alternative 3' Acceptor Site	0.23	T
TC0100002278.mm.1	-1.41	T	Col5a2	collagen, type V, alpha 2	Multiple_Complex	11.36	1.31e-05	0.0008			T
TC1100003292.mm.1	-1.1	T	Supt6	suppressor of Ty 6	Multiple_Complex	11.36	9.09e-07	0.0001	Cassette Exon	0.28	T
TC1100001155.mm.1	-6.95	T	Spag5	sperm associated antigen 5	Multiple_Complex	11.36	6.02e-06	0.0005			T
TC0900002325.mm.1	-2.96	T	Wdr61	WD repeat domain 61	Multiple_Complex	11.34	4.07e-05	0.0019			T
TC0900003342.mm.1	-10.35	T	Syncrip	synaptotagmin binding, cytoplasmic RNA interacting protein	Multiple_Complex	11.34	9.37e-09	4.2e-06	Alternative 3' Acceptor Site	0.23	T
TC1900000957.mm.1	-3.84	T	Sf3b2	splicing factor 3b, subunit 2	Multiple_Complex	11.34	0.0001	0.0039	Alternative 3' Acceptor Site	0.25	T
TC0400004196.mm.1	1.96	T	Aldh4a1	aldehyde dehydrogenase 4 family, member A1	Multiple_Complex	11.34	0.0031	0.0458			T
TC0500002508.mm.1	3.92	T	Apbb2	amyloid beta (A4) precursor protein-binding, family B, member 2	Multiple_Complex	11.33	0.001	0.0207			T
TC0600000655.mm.1	2.04	T	Plekha8	pleckstrin homology domain containing, family A (phosphoinositide binding specific) member 8	Multiple_Complex	11.33	0.0001	0.0046	Cassette Exon	0.25	T
TC0800001984.mm.1	-2.84	T	Nrg1	neuregulin 1; Synthetic construct Mus musculus clone IMAGE:100064088, MGC:193459 neuregulin 1 (Nrg1) mRNA, encodes complete protein.	Multiple_Complex	11.33	0.0011	0.0215			T
TC1900001388.mm.1	14.76	T	Asah2	N-acylsphingosine amidohydrolase 2	Multiple_Complex	11.32	8.54e-05	0.0033			T
TC1000000736.mm.1	50.51	T	S100b	S100 protein, beta polypeptide, neural	Coding	11.32	7.82e-06	0.0006			T
TC1800001741.mm.1	1.71	T	Pcdhgb1; Pcdhgb2; Pcdhgb4; Pcdhgb5; Pcdhgb6; Pcdhgb7; Pcdhgb8; Pcdhgc3; Pcdhgc4; Pcdhgc5; Pcdhga1; Pcdhga2; Pcdhga3; Pcdhga4; Pcdhga5; Pcdhga6; Pcdhga7; Pcdhga8; Pcdhga9; Pcdhga10; Pcdhga11; Pcdhga12	protocadherin gamma subfamily B, 1; protocadherin gamma subfamily B, 2; protocadherin gamma subfamily B, 4; protocadherin gamma subfamily B, 5; protocadherin gamma subfamily B, 6; protocadherin gamma subfamily B, 7; protocadherin gamma subfamily B, 8; protocadherin gamma subfamily C, 3; protocadherin gamma subfamily C, 4; protocadherin gamma subfamily C, 5; protocadherin gamma subfamily A, 1; pro…	Multiple_Complex	11.31	2.02e-05	0.0011	Cassette Exon	0.26	T
TC1400000329.mm.1	-1.36	T	Eaf1	ELL associated factor 1	Coding	11.31	6.62e-05	0.0027			T
TC0900001612.mm.1	-5.19	T	Ctnnb1; Mir7090	catenin (cadherin associated protein), beta 1; microRNA 7090	Multiple_Complex	11.31	0.0001	0.0041	Alternative 3' Acceptor Site	0.28	T
TC1500000395.mm.1	-1.06	T	Col14a1	collagen, type XIV, alpha 1	Coding	11.31	1.62e-05	0.001			T
TC1800000632.mm.1	-1.53	T	Csnk1a1	casein kinase 1, alpha 1	Multiple_Complex	11.29	0.0031	0.0452			T
TC0400002460.mm.1	-9.98	T	Ubap2	ubiquitin-associated protein 2	Multiple_Complex	11.28	0.0004	0.0097	Cassette Exon	0.2	T
TC0700001008.mm.1	-2.16	T	Igf1r	insulin-like growth factor I receptor	Multiple_Complex	11.28	0.0002	0.0058			T
TC0200000801.mm.1	-3.33	T	Kif5c	kinesin family member 5C	Multiple_Complex	11.27	0.001	0.0211			T
TC0600000002.mm.1	-1.21	T			NonCoding	11.26	3.22e-06	0.0003			T
TC0900000605.mm.1	242.15	T	Cryab	crystallin, alpha B; crystallin, alpha B (Cryab), mRNA.	Coding	11.26	0.0008	0.0169			T
TC1200000865.mm.1	5.94	T	Cipc	CLOCK interacting protein, circadian	Multiple_Complex	11.24	3.64e-06	0.0003			T
TC0700002746.mm.1	-1.11	T			NonCoding	11.24	0.0001	0.0038			T
TC1200000899.mm.1	-4.34	T	Nrxn3	neurexin III	Multiple_Complex	11.24	0.001	0.02			T
TC0800000449.mm.1	7.84	T	6430573F11Rik	RIKEN cDNA 6430573F11 gene	Multiple_Complex	11.24	0.0002	0.0052	Alternative 5' Donor Site	0.24	T
TC1700002813.mm.1	1.59	T	Ppt2	palmitoyl-protein thioesterase 2	Coding	11.22	0.0007	0.0159			T
TC1700000663.mm.1	-8.18	T	Ddah2	dimethylarginine dimethylaminohydrolase 2	Multiple_Complex	11.22	3.39e-05	0.0017			T
TC0100002203.mm.1	-1.4	T	Coa5	cytochrome C oxidase assembly factor 5	Multiple_Complex	11.22	8.59e-06	0.0006			T
TC1300000313.mm.1	-6.54	T	Gm26735	predicted gene, 26735 [Source:MGI Symbol;Acc:MGI:5477229]	NonCoding	11.22	0.0014	0.0266	Cassette Exon	0.21	T
TC0500002528.mm.1	30.55	T	Atp8a1	ATPase, aminophospholipid transporter (APLT), class I, type 8A, member 1	Multiple_Complex	11.2	0.0023	0.0365			T
TC0600001926.mm.1	5.87	T	Aass	aminoadipate-semialdehyde synthase	Multiple_Complex	11.2	0.0001	0.0041			T
TC0700001950.mm.1	1.14	T	Fank1	fibronectin type 3 and ankyrin repeat domains 1	Coding	11.18	8.19e-08	1.99e-05			T
TC1000001213.mm.1	1.03	T			NonCoding	11.17	8.34e-05	0.0032			T
TC1100001006.mm.1	2.23	T	Zzef1	zinc finger, ZZ-type with EF hand domain 1	Multiple_Complex	11.16	0.0009	0.0187			T
TC0700004547.mm.1	1.01	T	Muc6	mucin 6, gastric	Coding	11.16	0.0003	0.008			T
TC0200005296.mm.1	1.48	T	Ppp4r1l-ps	protein phosphatase 4, regulatory subunit 1-like, pseudogene	Multiple_Complex	11.15	0.0027	0.0416	Intron Retention	0.23	T
TC0300001035.mm.1	298.46	T	Tspan2	tetraspanin 2	Multiple_Complex	11.15	0.0012	0.0237			T
TC0500003174.mm.1	1.72	T	Dtx1	deltex 1 homolog (Drosophila)	Multiple_Complex	11.14	8.84e-06	0.0006	Alternative 3' Acceptor Site	0.28	T
TC0400001714.mm.1	8.92	T	Ece1	endothelin converting enzyme 1	Multiple_Complex	11.14	0.0015	0.0276			T
TC0100001570.mm.1	5.22	T	Olfml2b	olfactomedin-like 2B	Multiple_Complex	11.13	0.0003	0.0084			T
TC0200005516.mm.1	6.19	T	Tmem189	transmembrane protein 189	Multiple_Complex	11.12	7.49e-05	0.003			T
TC0600002013.mm.1	5.52	T	Lncpint	long non-protein coding RNA, Trp53 induced transcript	Multiple_Complex	11.12	0.0001	0.0041			T
TC0400001135.mm.1	-5.14	T	Lrp8	low density lipoprotein receptor-related protein 8, apolipoprotein e receptor	Multiple_Complex	11.12	3.76e-05	0.0018			T
TC0200002706.mm.1	1.02	T	Tubb1	tubulin, beta 1 class VI	Coding	11.12	0.0008	0.0169			T
TC1200001047.mm.1	4.68	T	Serpina3n	serine (or cysteine) peptidase inhibitor, clade A, member 3N	Coding	11.11	0.0003	0.0076			T
TC0200002157.mm.1	7.25	T	Slc24a3	solute carrier family 24 (sodium/potassium/calcium exchanger), member 3	Multiple_Complex	11.09	0.0022	0.0361			T
TC0100003863.mm.1	-1.02	T	Gm16026	predicted pseudogene 16026	Multiple_Complex	11.08	4.67e-07	6.86e-05			T
TC0700000896.mm.1	1.61	T	Nav2; Gm2788	neuron navigator 2; predicted gene 2788	Multiple_Complex	11.07	0.0012	0.0231			T
TC1200002525.mm.1	1.11	T	Serpina3g	serine (or cysteine) peptidase inhibitor, clade A, member 3G	Multiple_Complex	11.06	1.76e-05	0.001			T
TC0500000591.mm.1	-1.91	T	Tbc1d1	TBC1 domain family, member 1	Multiple_Complex	11.06	0.0004	0.011			T
TC0X00003057.mm.1	-1.11	T	Serpina7	serine (or cysteine) peptidase inhibitor, clade A (alpha-1 antiproteinase, antitrypsin), member 7	Coding	11.03	0.0023	0.0375			T
TC1400002075.mm.1	-1.05	T	Myh7	myosin, heavy polypeptide 7, cardiac muscle, beta	Multiple_Complex	11.03	1.99e-05	0.0011			T
TC1200001421.mm.1	3.15	T	Vsnl1	visinin-like 1	Coding	11.02	0.0002	0.0053	Cassette Exon	0.27	T
TC1300000275.mm.1	1.39	T	Fam65b	family with sequence similarity 65, member B; family with sequence similarity 65, member B (Fam65b), transcript variant 3, mRNA.	Multiple_Complex	10.99	0.0025	0.0392			T
TC0700001721.mm.1	2.42	T	Tmem159	transmembrane protein 159	Multiple_Complex	10.99	4.32e-06	0.0004	Cassette Exon	0.3	T
TC0100001294.mm.1	-1.36	T	Dennd1b	DENN/MADD domain containing 1B	Multiple_Complex	10.99	0.0026	0.0399	Alternative 3' Acceptor Site	0.22	T
TC0300003246.mm.1	1.85	T	Gstm3	glutathione S-transferase, mu 3	Coding	10.99	0.0026	0.0404			T
TC0600002714.mm.1	1.63	T	Cfap100	cilia and flagella associated protein 100	Multiple_Complex	10.97	0.0035	0.0494			T
TC0800001728.mm.1	1.36	T	Grtp1	GH regulated TBC protein 1	Coding	10.96	1.8e-05	0.001	Cassette Exon	0.24	T
TC0400000098.mm.1	-1.19	T	1700123M08Rik	RIKEN cDNA 1700123M08 gene	NonCoding	10.95	0.0019	0.032			T
TC0100003092.mm.1	-11.11	T	Snrpe	small nuclear ribonucleoprotein E	Coding	10.95	5.51e-06	0.0004	Intron Retention	0.37	T
TC1000002677.mm.1	28.74	T	Rmst	rhabdomyosarcoma 2 associated transcript (non-coding RNA)	NonCoding	10.95	0.0005	0.013	Intron Retention	0.25	T
TC0500001021.mm.1	2.18	T	Dmp1	dentin matrix protein 1	Coding	10.95	0.0006	0.0138			T
TC0500000215.mm.1	3.52	T	Slc4a2	solute carrier family 4 (anion exchanger), member 2	Multiple_Complex	10.94	0.0006	0.0145			T
TC0400002606.mm.1	220.5	T	Gabbr2	gamma-aminobutyric acid (GABA) B receptor, 2; Synthetic construct Mus musculus clone IMAGE:100062836, MGC:190967 gamma-aminobutyric acid (GABA) B receptor 2 (Gabbr2) mRNA, encodes complete protein.	Multiple_Complex	10.94	0.0002	0.007			T
TC1100001969.mm.1	1.02	T	Tmc8	transmembrane channel-like gene family 8	Multiple_Complex	10.94	1.57e-05	0.0009			T
TC1200001362.mm.1	3.88	T	Fam228a	family with sequence similarity 228, member A	Coding	10.93	0.0034	0.0491			T
TC0200004089.mm.1	2.24	T	Gm13767	predicted gene 13767	Multiple_Complex	10.93	2.87e-05	0.0015			T
TC1100001016.mm.1	1.02	T	P2rx5	purinergic receptor P2X, ligand-gated ion channel, 5	Coding	10.93	0.001	0.0204			T
TC0400001006.mm.1	1.34	T	Alg6	asparagine-linked glycosylation 6 (alpha-1,3,-glucosyltransferase)	Multiple_Complex	10.93	0.0011	0.022			T
TC0900000176.mm.1	-1.7	T	Ubl5	ubiquitin-like 5	Multiple_Complex	10.93	9.73e-06	0.0007			T
TC1000001216.mm.1	-9.03	T	Kitl	kit ligand	Coding	10.92	0.0007	0.0161			T
TC1400002073.mm.1	-1.05	T	Myh6	myosin, heavy polypeptide 6, cardiac muscle, alpha	Multiple_Complex	10.92	2.2e-05	0.0012			T
TC0900002274.mm.1	1.91	T	Dixdc1	DIX domain containing 1	Multiple_Complex	10.91	0.0004	0.0105	Cassette Exon	0.25	T
TC1900001414.mm.1	1.02	T	Ankrd22	ankyrin repeat domain 22	Multiple_Complex	10.9	5.88e-09	3.1e-06			T
TC1200001763.mm.1	-1.83	T	Ppp2r3c	protein phosphatase 2, regulatory subunit B, gamma; protein phosphatase 2, regulatory subunit B'', gamma	Coding	10.89	1.3e-05	0.0008			T
TC1400000947.mm.1	4.4	T	Adra1a	adrenergic receptor, alpha 1a; adrenergic receptor, alpha 1a (Adra1a), mRNA.	Multiple_Complex	10.88	0.0003	0.0081			T
TC0500003660.mm.1	-9.52	T	Hsph1	heat shock 105kDa/110kDa protein 1	Multiple_Complex	10.88	0.0008	0.0179			T
TC0500002983.mm.1	1.44	T	Gm15787	predicted gene 15787	NonCoding	10.87	0.0006	0.0132			T
TC1000002172.mm.1	5.14	T	Fam184a	family with sequence similarity 184, member A	Multiple_Complex	10.86	0.0002	0.0051			T
TC1100004122.mm.1	1	T	Rhbdf2	rhomboid 5 homolog 2 (Drosophila)	Multiple_Complex	10.86	0.0001	0.0049			T
TC0800000538.mm.1	6.97	T	Acsl1	acyl-CoA synthetase long-chain family member 1	Multiple_Complex	10.85	0.0008	0.0179			T
TC0X00001873.mm.1	-1.42	T	Cask	calcium/calmodulin-dependent serine protein kinase (MAGUK family); Synthetic construct Mus musculus clone IMAGE:100063272, MGC:191048 calcium/calmodulin-dependent serine protein kinase (MAGUK family) (Cask) mRNA, encodes complete protein.; calcium/calmodulin-dependent serine protein kinase (MAGUK family) (Cask), mRNA.	Multiple_Complex	10.84	1.54e-05	0.0009			T
TC0400002503.mm.1	2.24	T	Gm13305; Gm2002; Il11ra2	predicted gene 13305; predicted gene 2002 (Gm2002), mRNA.; interleukin 11 receptor, alpha chain 2; interleukin 11 receptor, alpha chain 2, mRNA (cDNA clone MGC:164180 IMAGE:40130826), complete cds.; predicted gene 2002	Coding	10.84	2.99e-05	0.0015	Cassette Exon	0.28	T
TC4_JH584293_random00000001.mm.1	2.24	T	Gm13305; Gm2002; Il11ra2	predicted gene 13305 (Gm13305), mRNA.; predicted gene 2002 (Gm2002), mRNA.; interleukin 11 receptor, alpha chain 2 (Il11ra2), mRNA.; interleukin 11 receptor, alpha chain 2, mRNA (cDNA clone MGC:164180 IMAGE:40130826), complete cds.; interleukin 11 receptor, alpha chain 2	Coding	10.84	2.99e-05	0.0015	Cassette Exon	0.28	T
TC4_JH584294_random00000006.mm.1	2.24	T	Gm13305; Gm2002; Il11ra2	predicted gene 13305 (Gm13305), mRNA.; predicted gene 2002 (Gm2002), mRNA.; interleukin 11 receptor, alpha chain 2 (Il11ra2), mRNA.; interleukin 11 receptor, alpha chain 2, mRNA (cDNA clone MGC:164180 IMAGE:40130826), complete cds.; interleukin 11 receptor, alpha chain 2	Coding	10.84	2.99e-05	0.0015	Cassette Exon	0.28	T
TC0100001058.mm.1	-6.53	T	Nifk	nucleolar protein interacting with the FHA domain of MKI67	Coding	10.83	8.25e-06	0.0006			T
TC1500000688.mm.1	-1.3	T	Apobec3	apolipoprotein B mRNA editing enzyme, catalytic polypeptide 3	Multiple_Complex	10.83	0.0007	0.0153	Intron Retention	0.4	T
TC1700001877.mm.1	3.54	T	Angptl4	angiopoietin-like 4	Multiple_Complex	10.83	0.0001	0.0038	Cassette Exon	0.27	T
TC1100002702.mm.1	2.39	T	Jade2	jade family PHD finger 2	Multiple_Complex	10.8	4.94e-05	0.0022	Alternative 3' Acceptor Site	0.29	T
TC0100001240.mm.1	-22.63	T	Ube2t	ubiquitin-conjugating enzyme E2T (putative)	Multiple_Complex	10.8	6.49e-05	0.0027			T
TC1800000314.mm.1	-1.36	T	Paip2	polyadenylate-binding protein-interacting protein 2	Multiple_Complex	10.8	1.85e-05	0.0011			T
TC0X00003250.mm.1	-1.55	T	Yy2; Mbtps2	Yy2 transcription factor; membrane-bound transcription factor peptidase, site 2	Multiple_Complex	10.79	0.0017	0.0293	Alternative 3' Acceptor Site	0.27	T
TC0400003208.mm.1	8.68	T	Acot11	acyl-CoA thioesterase 11	Multiple_Complex	10.79	0.0002	0.0072	Cassette Exon	0.22	T
TC0600002629.mm.1	4.08	T	Dusp11	dual specificity phosphatase 11 (RNA/RNP complex 1-interacting)	Multiple_Complex	10.78	0.0002	0.0072	Cassette Exon	0.22	T
TC1900000549.mm.1	-5.3	T	Slc35g1	solute carrier family 35, member G1	Coding	10.78	3.49e-05	0.0017			T
TC1600000284.mm.1	-2.55	T	Ece2	endothelin converting enzyme 2	Multiple_Complex	10.76	0.0008	0.0167			T
TC0100001483.mm.1	1.19	T			NonCoding	10.75	0.0002	0.0066			T
TC1400001314.mm.1	-7.72	T	Ipo5	importin 5	Multiple_Complex	10.75	4.51e-06	0.0004	Cassette Exon	0.25	T
TC1500001887.mm.1	-1.31	T	Npcd; Cbx6; Nptxr	neuronal pentraxin chromo domain; chromobox 6; neuronal pentraxin receptor	Multiple_Complex	10.74	1.93e-06	0.0002			T
TC1900000984.mm.1	1.61	T	Malat1; MALAT1	metastasis associated lung adenocarcinoma transcript 1 (non-coding RNA); Metastasis associated lung adenocarcinoma transcript 1	NonCoding	10.73	4.05e-08	1.19e-05	Intron Retention	0.38	T
TC0200001963.mm.1	-2.57	T	Stk35	serine/threonine kinase 35	Multiple_Complex	10.73	0.0003	0.0082			T
TC1500001742.mm.1	1.1	T	Top1mt	DNA topoisomerase 1, mitochondrial	Multiple_Complex	10.73	6.96e-05	0.0028	Cassette Exon	0.21	T
TC0300003084.mm.1	1.01	T	Clca1	chloride channel accessory 1	Coding	10.73	7.05e-06	0.0005			T
TC0600002002.mm.1	-1.79	T	Cep41	centrosomal protein 41	Multiple_Complex	10.73	6.2e-05	0.0026			T
TC0600003005.mm.1	-1.35	T	Cacna1c	calcium channel, voltage-dependent, L type, alpha 1C subunit	Multiple_Complex	10.71	0.0001	0.0044			T
TC1100001832.mm.1	15.43	T	Arsg	arylsulfatase G	Multiple_Complex	10.71	2.93e-05	0.0015			T
TC0900002776.mm.1	-3.24	T	Ube2cbp	ubiquitin-conjugating enzyme E2C binding protein	Multiple_Complex	10.7	1.52e-05	0.0009			T
TC1100003776.mm.1	1.07	T	Dnajc7	DnaJ (Hsp40) homolog, subfamily C, member 7	Multiple_Complex	10.69	0.0011	0.0212	Alternative 5' Donor Site	0.34	T
TC0300001816.mm.1	2.17	T	Ccdc39	coiled-coil domain containing 39; Synthetic construct Mus musculus clone IMAGE:100062264, MGC:190440 coiled-coil domain containing 39 (Ccdc39) mRNA, encodes complete protein.	Multiple_Complex	10.69	0.0013	0.0252	Cassette Exon	0.2	T
TC0700000806.mm.1	5.49	T	Josd2; Mir7052	Josephin domain containing 2; microRNA 7052	Multiple_Complex	10.67	0.0008	0.017			T
TC1500001890.mm.1	2.5	T	Cbx7	chromobox 7	Multiple_Complex	10.67	0.0002	0.0066	Alternative 5' Donor Site	0.25	T
TC0300002361.mm.1	-3.17	T	Ubap2l	ubiquitin-associated protein 2-like; ubiquitin associated protein 2-like	Multiple_Complex	10.66	0.0002	0.0069	Intron Retention	0.46	T
TC0300000675.mm.1	2.49	T	Sh3d19	SH3 domain protein D19	Multiple_Complex	10.65	5.66e-05	0.0024			T
TC0200002453.mm.1	-1.28	T	Plcg1	phospholipase C, gamma 1	Multiple_Complex	10.65	0.0022	0.0357	Alternative 5' Donor Site	0.25	T
TC1600001104.mm.1	-3.67	T			NonCoding	10.65	0.0014	0.0264			T
TC0300002906.mm.1	-17.35	T	Larp7	La ribonucleoprotein domain family, member 7; Synthetic construct Mus musculus clone IMAGE:100016333, MGC:184518 La ribonucleoprotein domain family, member 7 (Larp7) mRNA, encodes complete protein.	Coding	10.65	2.76e-08	8.97e-06	Cassette Exon	0.23	T
TC0400000916.mm.1	-1.83	T	Gm12609; Gm12610; RP23-445E3.1; RP23-445E3.2	predicted gene 12609 [Source:MGI Symbol;Acc:MGI:3652142]; predicted gene 12610 [Source:MGI Symbol;Acc:MGI:3652143]; novel transcript	NonCoding	10.65	6.39e-05	0.0027	Cassette Exon	0.36	T
TC0300000096.mm.1	118.98	T	Car2	carbonic anhydrase 2	Coding	10.64	0.0002	0.0066			T
TC0500002559.mm.1	1.77	T	Gabra2	gamma-aminobutyric acid (GABA) A receptor, subunit alpha 2	Coding	10.64	0.0004	0.0105			T
TC0500001270.mm.1	-3.96	T	Cit	citron	Multiple_Complex	10.63	0.0002	0.0069	Cassette Exon	0.27	T
TC1100003044.mm.1	-1.22	T	Dnah2	dynein, axonemal, heavy chain 2	Multiple_Complex	10.62	0.0003	0.0078			T
TC1400002241.mm.1	-1.05	T			NonCoding	10.61	0.0011	0.0219			T
TC0200003643.mm.1	2.51	T	Fign	fidgetin; fidgetin (Fign), transcript variant 2, mRNA.	Multiple_Complex	10.6	0.0004	0.0098			T
TC0800001903.mm.1	1.37	T	Plekha2	pleckstrin homology domain-containing, family A (phosphoinositide binding specific) member 2	Coding	10.6	1.06e-07	2.39e-05			T
TC1200000833.mm.1	-51.28	T	Fos	FBJ osteosarcoma oncogene	Multiple_Complex	10.6	5.47e-05	0.0024	Cassette Exon	0.23	T
TC0600001136.mm.1	2.95	T	Mitf	microphthalmia-associated transcription factor	Multiple_Complex	10.6	0.0018	0.0312			T
TC0700003451.mm.1	3.39	T	Synm	synemin, intermediate filament protein; Synthetic construct Mus musculus clone IMAGE:100068133, MGC:195750 synemin, intermediate filament protein (Synm) mRNA, encodes complete protein.	Coding	10.6	1.17e-05	0.0008	Cassette Exon	0.33	T
TC0800002505.mm.1	14.06	T	Ednra	endothelin receptor type A	Multiple_Complex	10.6	4.11e-05	0.0019			T
TC1200001869.mm.1	1.17	T	Sos2	son of sevenless homolog 2 (Drosophila)	Multiple_Complex	10.59	0.0025	0.039			T
TC1800001413.mm.1	-1.23	T	Hmgxb3	HMG box domain containing 3	Multiple_Complex	10.59	0.0011	0.0221	Alternative 5' Donor Site	0.27	T
TC0500000459.mm.1	14.81	T	Cpeb2	cytoplasmic polyadenylation element binding protein 2	Multiple_Complex	10.58	8.34e-07	0.0001			T
TC1200000750.mm.1	-1.32	T	Srsf5	serine/arginine-rich splicing factor 5	Multiple_Complex	10.58	8.12e-05	0.0032	Intron Retention	0.41	T
TC0X00002737.mm.1	-28.44	T	Gm9103	predicted gene 9103 [Source:MGI Symbol;Acc:MGI:3645364]	Pseudogene	10.57	6.25e-06	0.0005			T
TC1300002527.mm.1	-2.07	T	Bdp1	B double prime 1, subunit of RNA polymerase III transcription initiation factor IIIB	Multiple_Complex	10.57	4.09e-05	0.0019			T
TC0700001851.mm.1	-2.49	T	Srcap; Tmem265	Snf2-related CREBBP activator protein; transmembrane protein 265	Multiple_Complex	10.56	1.36e-05	0.0008			T
TC1400002331.mm.1	-2.01	T	Ccar2	cell cycle activator and apoptosis regulator 2	Coding	10.56	0.003	0.0446			T
TC0400000381.mm.1	2.04	T	Il11ra1	interleukin 11 receptor, alpha chain 1	Multiple_Complex	10.55	0.0008	0.0179			T
TC1200001077.mm.1	-8.72	T	Vrk1	vaccinia related kinase 1	Coding	10.54	5.41e-10	6.02e-07			T
TC1100001661.mm.1	-1.15	T	Tmem106a	transmembrane protein 106A	Multiple_Complex	10.54	0.0003	0.0093			T
TC0100000356.mm.1	2.64	T	Dnah7c	dynein, axonemal, heavy chain 7C	Coding	10.53	0.002	0.0334			T
TC0700004630.mm.1	2.62	T	Hsd3b7	hydroxy-delta-5-steroid dehydrogenase, 3 beta- and steroid delta-isomerase 7	Multiple_Complex	10.53	0.0006	0.0144	Cassette Exon	0.29	T
TC1100004288.mm.1	1.66	T	Urgcp	upregulator of cell proliferation	Multiple_Complex	10.53	0.0021	0.0345			T
TC0700004519.mm.1	1.13	T	Sigirr	single immunoglobulin and toll-interleukin 1 receptor (TIR) domain	Coding	10.53	0.0002	0.0065			T
TC1000001919.mm.1	5.36	T	Lama2	laminin, alpha 2; Synthetic construct Mus musculus clone IMAGE:100069455, MGC:199357 laminin, alpha 2 (Lama2) mRNA, encodes complete protein.	Coding	10.52	0.0022	0.0355			T
TC0200003278.mm.1	1.06	T	Ptges	prostaglandin E synthase	Multiple_Complex	10.51	6.49e-07	8.7e-05	Alternative 5' Donor Site	0.27	T
TC0X00001665.mm.1	1.18	T	Pir	pirin	Multiple_Complex	10.51	0.0025	0.0396			T
TC0600001441.mm.1	-1.37	T	Zfp384	zinc finger protein 384	Multiple_Complex	10.5	0.0002	0.0066	Intron Retention	0.43	T
TC1400000320.mm.1	-4.36	T	Pbrm1	polybromo 1; Synthetic construct Mus musculus clone IMAGE:100069544, MGC:199446 polybromo 1 (Pbrm1) mRNA, encodes complete protein.	Multiple_Complex	10.5	0.0035	0.0493			T
TC1900000744.mm.1	15.09	T	AA387883	expressed sequence AA387883; expressed sequence AA387883 (AA387883), non-coding RNA.	NonCoding	10.5	6.55e-06	0.0005			T
TC1300001447.mm.1	-1.08	T	Actn2	actinin alpha 2	Coding	10.5	1.61e-05	0.001	Alternative 3' Acceptor Site	0.27	T
TC0X00001282.mm.1	-4.88	T	Rpl36a	ribosomal protein L36A	Multiple_Complex	10.49	0.0004	0.0104			T
TC0X00001549.mm.1	-1.08	T	Gpr143	G protein-coupled receptor 143	Multiple_Complex	10.49	1.38e-06	0.0002			T
TC1600001319.mm.1	1.5	T	Gp1bb; Sept5	glycoprotein Ib, beta polypeptide; septin 5	Coding	10.48	4.45e-05	0.002			T
TC1000000677.mm.1	1.06	T			NonCoding	10.47	8.61e-05	0.0033			T
TC1700000090.mm.1	3.72	T	Prr18	proline rich 18; proline rich region 18	Multiple_Complex	10.45	4.08e-08	1.19e-05			T
TC0100000980.mm.1	10.86	T			NonCoding	10.44	0.001	0.021			T
TC0800002238.mm.1	1.98	T	Wdr17	WD repeat domain 17	Multiple_Complex	10.44	0.0031	0.0462			T
TC1600000765.mm.1	2.88	T	Cldnd1	claudin domain containing 1	Multiple_Complex	10.44	0.0006	0.014			T
TC0X00002085.mm.1	4.2	T	Lamp2	lysosomal-associated membrane protein 2	Multiple_Complex	10.44	0.0001	0.0048			T
TC0600001622.mm.1	-2.17	T	Atf7ip	activating transcription factor 7 interacting protein	Multiple_Complex	10.43	0.0019	0.0328			T
TC1400001205.mm.1	6.1	T	9330188P03Rik	RIKEN cDNA 9330188P03 gene; PREDICTED: RIKEN cDNA 9330188P03 gene (9330188P03Rik), miscRNA.	NonCoding	10.43	0.0004	0.01			T
TC1000000550.mm.1	1.18	T			NonCoding	10.43	4.83e-06	0.0004			T
TC0200005175.mm.1	7.36	T	Prex1	phosphatidylinositol-3,4,5-trisphosphate-dependent Rac exchange factor 1	Multiple_Complex	10.42	0.0005	0.0127	Cassette Exon	0.24	T
TC0900001119.mm.1	1.26	T	Prss35	protease, serine 35; protease, serine, 35	Coding	10.42	0.0002	0.0051			T
TC1000001531.mm.1	4.03	T	Lrig3	leucine-rich repeats and immunoglobulin-like domains 3	Multiple_Complex	10.42	0.001	0.0207	Cassette Exon	0.28	T
TC1200000834.mm.1	6.09	T			NonCoding	10.41	7.57e-06	0.0005			T
TC0800002252.mm.1	-10.48	T	Sap30	sin3 associated polypeptide	Coding	10.41	2.42e-05	0.0013			T
TC0800003248.mm.1	1.39	T	1190005I06Rik	RIKEN cDNA 1190005I06 gene	Coding	10.4	1.02e-07	2.32e-05	Cassette Exon	0.25	T
TC1200000282.mm.1	2.44	T	Sypl	synaptophysin-like protein	Multiple_Complex	10.4	0.0034	0.0487			T
TC0700001324.mm.1	-1.03	T	Gm26862	predicted gene, 26862 [Source:MGI Symbol;Acc:MGI:5477356]	NonCoding	10.39	3.5e-05	0.0017			T
TC1900000758.mm.1	-3.16	T	Smc3	structural maintenance of chromosomes 3	Multiple_Complex	10.39	0.0025	0.0398	Alternative 3' Acceptor Site	0.28	T
TC0700004575.mm.1	1.18	T	Th	tyrosine hydroxylase; Synthetic construct Mus musculus clone IMAGE:100062130, MGC:190374 tyrosine hydroxylase (Th) mRNA, encodes complete protein.	Coding	10.38	0.0015	0.0272			T
TC1600000701.mm.1	-1.06	T	Myh15	myosin, heavy chain 15	Coding	10.37	0.0007	0.015			T
TC0100001200.mm.1	1.57	T	Lrrn2	leucine rich repeat protein 2, neuronal	Multiple_Complex	10.36	0.003	0.0449	Alternative 5' Donor Site	0.27	T
TC0X00001277.mm.1	6.54	T	Drp2	dystrophin related protein 2; dystrophin related protein 2 (Drp2), mRNA.	Multiple_Complex	10.35	3.19e-06	0.0003			T
TC0100000656.mm.1	5.1	T	Dnajb2	DnaJ (Hsp40) homolog, subfamily B, member 2	Multiple_Complex	10.34	8.12e-06	0.0006			T
TC1100000755.mm.1	-1.01	T	Myo15	myosin XV	Multiple_Complex	10.33	6.7e-06	0.0005			T
TC1600001993.mm.1	1.71	T	Grik1	glutamate receptor, ionotropic, kainate 1	Multiple_Complex	10.33	1.52e-05	0.0009	Cassette Exon	0.23	T
TC0500001597.mm.1	1.05	T	Rasa4; Mir7035	RAS p21 protein activator 4; microRNA 7035	Multiple_Complex	10.32	6.96e-05	0.0028			T
TC0100002210.mm.1	1.45	T	Mitd1	MIT, microtubule interacting and transport, domain containing 1	Multiple_Complex	10.31	0.0009	0.0192	Cassette Exon	0.21	T
TC0400003101.mm.1	1.05	T	Cyp2j5	cytochrome P450, family 2, subfamily j, polypeptide 5	Coding	10.3	3.46e-05	0.0017			T
TC0900001576.mm.1	2.08	T	Acaa1a	acetyl-Coenzyme A acyltransferase 1A	Multiple_Complex	10.3	0.0007	0.0156			T
TC0200000347.mm.1	-4.47	T	Gad2	glutamic acid decarboxylase 2	Multiple_Complex	10.3	3.4e-06	0.0003			T
TC1900000335.mm.1	2.57	T	Aldh1a1	aldehyde dehydrogenase family 1, subfamily A1	Coding	10.29	7.62e-07	9.79e-05	Cassette Exon	0.21	T
TC0900001345.mm.1	16.64	T	Dusp7	dual specificity phosphatase 7	Multiple_Complex	10.29	0.0013	0.0243			T
TC1_GL456212_random00000013.mm.1	-1.01	T	Sp110	Sp110 nuclear body protein, mRNA (cDNA clone MGC:49514 IMAGE:4008284), complete cds.; Sp110 nuclear body protein	Coding	10.28	1.54e-06	0.0002			T
TC1100003769.mm.1	10.56	T	Jup	junction plakoglobin	Multiple_Complex	10.27	1.69e-05	0.001	Cassette Exon	0.23	T
TC0700002476.mm.1	-12.44	T	Gm26802	predicted gene, 26802 [Source:MGI Symbol;Acc:MGI:5477296]	NonCoding	10.27	0.0003	0.0078			T
TC1900000386.mm.1	4.87	T	Apba1	amyloid beta (A4) precursor protein binding, family A, member 1; amyloid beta (A4) precursor protein binding, family A, member 1	Multiple_Complex	10.26	9.99e-05	0.0037			T
TC0100003042.mm.1	2.82	T	Pfkfb2; C4bp-ps1	6-phosphofructo-2-kinase/fructose-2,6-biphosphatase 2; complement component 4 binding protein, pseudogene 1	Multiple_Complex	10.24	0.0002	0.0065			T
TC0300002719.mm.1	1.08	T			NonCoding	10.24	0.0001	0.0038			T
TC1000001490.mm.1	-1.05	T	Wif1	Wnt inhibitory factor 1	Multiple_Complex	10.23	1.2e-06	0.0001			T
TC0400003888.mm.1	1.46	T	Plekhm2	pleckstrin homology domain containing, family M (with RUN domain) member 2	Multiple_Complex	10.23	0.0026	0.0399			T
TC1300000551.mm.1	2.75	T	Id4	inhibitor of DNA binding 4; Synthetic construct Mus musculus clone IMAGE:100069483, MGC:199385 inhibitor of DNA binding 4 (Id4) mRNA, encodes complete protein.	Coding	10.22	0.0014	0.0256			T
TC0500000534.mm.1	-1.28	T	Anapc4	anaphase promoting complex subunit 4	Multiple_Complex	10.22	0.0011	0.0225	Alternative 3' Acceptor Site	0.3	T
TC0500003226.mm.1	3.79	T	AI480526; AC158114.3	expressed sequence AI480526 [Source:MGI Symbol;Acc:MGI:2140910]; novel transcript	NonCoding	10.22	0.0024	0.0388			T
TC0300001486.mm.1	2.04	T	Syde2	synapse defective 1, Rho GTPase, homolog 2 (C. elegans)	Coding	10.21	0.0003	0.008			T
TC0800000088.mm.1	1.08	T	Col4a2	collagen, type IV, alpha 2	Multiple_Complex	10.2	3.21e-05	0.0016			T
TC0600002496.mm.1	1.53	T	Tcf7l1	transcription factor 7 like 1 (T cell specific, HMG box)	Multiple_Complex	10.19	0.0031	0.0457	Alternative 3' Acceptor Site	0.26	T
TC0800002188.mm.1	3.43	T	Tenm3	teneurin transmembrane protein 3	Multiple_Complex	10.18	0.0023	0.0371	Cassette Exon	0.28	T
TC0400001642.mm.1	-15.77	T	Aunip	aurora kinase A and ninein interacting protein	Coding	10.18	8.32e-06	0.0006			T
TC1200001787.mm.1	2.21	T	E030019B13Rik	RIKEN cDNA E030019B13 gene; RIKEN cDNA E030019B13 gene (E030019B13Rik), non-coding RNA.	NonCoding	10.17	0.0002	0.0051	Cassette Exon	0.27	T
TC1100004296.mm.1	-9.7	T	Nme1	NME/NM23 nucleoside diphosphate kinase 1	Coding	10.16	1.72e-08	6.39e-06	Alternative 3' Acceptor Site	0.21	T
TC1200002045.mm.1	2.75	T	Dpf3	D4, zinc and double PHD fingers, family 3	Multiple_Complex	10.15	1.23e-05	0.0008	Alternative 3' Acceptor Site	0.31	T
TC0300001495.mm.1	-1.02	T	Gm16325	predicted gene 16325	NonCoding	10.14	4.5e-06	0.0004			T
TC1100004100.mm.1	-7.33	T	H3f3b	H3 histone, family 3B	Multiple_Complex	10.14	3.53e-07	5.6e-05	Cassette Exon	0.33	T
TC1100000234.mm.1	-3.56	T	Cct4	chaperonin containing Tcp1, subunit 4 (delta)	Multiple_Complex	10.13	7.3e-06	0.0005			T
TC0900003016.mm.1	2.32	T	Tex264	testis expressed gene 264; testis expressed gene 264 (Tex264), transcript variant 1, mRNA.	Multiple_Complex	10.12	0.0018	0.0305			T
TC0X00003079.mm.1	-1.01	T	Tex13	testis expressed gene 13	Multiple_Complex	10.12	5.36e-05	0.0023			T
TC1100000654.mm.1	4.16	T	Gria1	glutamate receptor, ionotropic, AMPA1 (alpha 1)	Multiple_Complex	10.11	0.0003	0.0075			T
TC0500003284.mm.1	2.96	T	Slc15a4	solute carrier family 15, member 4	Multiple_Complex	10.1	0.002	0.034			T
TC0800001268.mm.1	1.37	T			NonCoding	10.1	7.63e-07	9.8e-05			T
TC1900000350.mm.1	-7.5	T	Tmem2	transmembrane protein 2; transmembrane protein 2 (Tmem2), transcript variant 2, mRNA.	Multiple_Complex	10.09	6.71e-06	0.0005			T
TC0800002950.mm.1	1.3	T	Ldhd	lactate dehydrogenase D	Multiple_Complex	10.09	1.45e-07	2.98e-05			T
TC0500001066.mm.1	-5.16	T	Cdc7	cell division cycle 7 (S. cerevisiae)	Multiple_Complex	10.08	8.02e-05	0.0032			T
TC1100001564.mm.1	3.36	T	Ppp1r1b	protein phosphatase 1, regulatory (inhibitor) subunit 1B	Multiple_Complex	10.07	1.42e-08	5.54e-06			T
TC0100000230.mm.1	11.42	T	Arhgef4; C230030N03Rik	Rho guanine nucleotide exchange factor (GEF) 4; RIKEN cDNA C230030N03 gene	Multiple_Complex	10.06	3.13e-06	0.0003			T
TC0500003116.mm.1	2.86	T	Hspb8	heat shock protein 8	Multiple_Complex	10.06	1.01e-07	2.3e-05			T
TC1100000759.mm.1	1.32	T	Llgl1	lethal giant larvae homolog 1 (Drosophila)	Multiple_Complex	10.05	4e-06	0.0003			T
TC0800002437.mm.1	-1.84	T	Unc13a	unc-13 homolog A (C. elegans)	Multiple_Complex	10.05	7.33e-08	1.84e-05			T
TC1700000657.mm.1	-4.25	T	Lsm2	LSM2 homolog, U6 small nuclear RNA associated (S. cerevisiae)	Multiple_Complex	10.05	2.15e-06	0.0002			T
TC0800000646.mm.1	19.45	T	Mfap3l	microfibrillar-associated protein 3-like	Multiple_Complex	10.05	0.0001	0.0042			T
TC0600001828.mm.1	-8.62	T			NonCoding	10.04	0.0002	0.0051			T
TC1100003487.mm.1	2.12	T	Lpo	lactoperoxidase	Multiple_Complex	10.03	1.39e-06	0.0002			T
TC0200003171.mm.1	-2.85	T	Camsap1	calmodulin regulated spectrin-associated protein 1; calmodulin regulated spectrin-associated protein 1 (Camsap1), mRNA.	Multiple_Complex	10.01	0.0002	0.0056			T
TC1000002264.mm.1	-15	T	Ddx21	DEAD (Asp-Glu-Ala-Asp) box polypeptide 21	Coding	9.99	4.15e-06	0.0003			T
TC0200000036.mm.1	-8.55	T	Sephs1	selenophosphate synthetase 1	Multiple_Complex	9.99	4.98e-06	0.0004			T
TC1100003455.mm.1	1.69	T	Cltc	clathrin, heavy polypeptide (Hc)	Multiple_Complex	9.98	9.4e-05	0.0035	Cassette Exon	0.38	T
TC1900001323.mm.1	3.61	T	Glis3	GLIS family zinc finger 3; Synthetic construct Mus musculus clone IMAGE:100068065, MGC:195682 GLIS family zinc finger 3 (Glis3) mRNA, encodes complete protein.	Multiple_Complex	9.98	4.24e-05	0.002			T
TC1300002306.mm.1	-11.11	T	Trip13	thyroid hormone receptor interactor 13	Coding	9.97	0.0002	0.0052	Cassette Exon	0.2	T
TC1000002828.mm.1	2.1	T	Syt1	synaptotagmin I	Multiple_Complex	9.96	1.27e-05	0.0008	Cassette Exon	0.28	T
TC0700002007.mm.1	1.02	T	Cd163l1	CD163 molecule-like 1	Coding	9.95	0.0006	0.0137			T
TC0X00002441.mm.1	-5.89	T	Hcfc1	host cell factor C1	Multiple_Complex	9.95	4.52e-05	0.0021			T
TC1700001075.mm.1	-2.46	T	Ppp4r1	protein phosphatase 4, regulatory subunit 1	Multiple_Complex	9.94	7.04e-05	0.0029			T
TC0600001953.mm.1	58.76	T	Gpr37	G protein-coupled receptor 37	Coding	9.94	0.0012	0.0236	Cassette Exon	0.23	T
TC1100001265.mm.1	1.34	T	Wfdc18	WAP four-disulfide core domain 18	Multiple_Complex	9.94	1.56e-07	3.11e-05			T
TC0200003235.mm.1	1.07	T	1700026L06Rik	RIKEN cDNA 1700026L06 gene	Multiple_Complex	9.93	7.99e-05	0.0031			T
TC1200001758.mm.1	-8.12	T	Baz1a	bromodomain adjacent to zinc finger domain 1A	Multiple_Complex	9.92	6.05e-06	0.0005			T
TC0400002454.mm.1	-10.43	T	Bag1	BCL2-associated athanogene 1	Coding	9.91	0.0002	0.0057			T
TC0400004195.mm.1	2.62	T	Iffo2	intermediate filament family orphan 2	Multiple_Complex	9.9	0.0031	0.0454			T
TC0900003273.mm.1	1.46	T	Ccdc13	coiled-coil domain containing 13	Multiple_Complex	9.9	1.05e-07	2.37e-05	Cassette Exon	0.21	T
TC1200001106.mm.1	3.53	T	Hhipl1	hedgehog interacting protein-like 1	Coding	9.89	0.0022	0.0358	Cassette Exon	0.31	T
TC1100003034.mm.1	1.07	T	Gucy2e	guanylate cyclase 2e	Multiple_Complex	9.88	2.4e-05	0.0013			T
TC0700002643.mm.1	-4.98	T	Hnrnpul1	heterogeneous nuclear ribonucleoprotein U-like 1	Multiple_Complex	9.88	9.52e-06	0.0006			T
TC1700000625.mm.1	-1.07	T	H2-Ob	histocompatibility 2, O region beta locus	Multiple_Complex	9.88	0.0018	0.031	Alternative 3' Acceptor Site	0.27	T
TC1000000015.mm.1	-5.71	T	Mthfd1l	methylenetetrahydrofolate dehydrogenase (NADP+ dependent) 1-like	Multiple_Complex	9.87	5.3e-06	0.0004			T
TC0100003203.mm.1	1.35	T	Trove2	TROVE domain family, member 2	Multiple_Complex	9.86	0.0005	0.0118	Cassette Exon	0.23	T
TC0X00003202.mm.1	-4.36	T	Gm20264	PREDICTED: predicted gene, 20264 (Gm20264), miscRNA.	NonCoding	9.86	0.0002	0.0055			T
TC1900000888.mm.1	3.68	T	Tcirg1	T cell, immune regulator 1, ATPase, H+ transporting, lysosomal V0 protein A3	Multiple_Complex	9.86	0.0017	0.0298			T
TC1500001935.mm.1	6.03	T	Desi1	desumoylating isopeptidase 1	Multiple_Complex	9.85	0.0019	0.0317	Alternative 3' Acceptor Site	0.35	T
TC0100000984.mm.1	-10.09	T	Gm20253	PREDICTED: predicted gene, 20253 (Gm20253), miscRNA.	NonCoding	9.84	0.0005	0.0116			T
TC0600000661.mm.1	-6.09	T	Gars	glycyl-tRNA synthetase	Coding	9.84	9.79e-05	0.0037			T
TC1800000953.mm.1	-1.13	T	Mkx	mohawk homeobox	Multiple_Complex	9.83	2.87e-06	0.0003			T
TC1900000118.mm.1	1.2	T	Rasgrp2	RAS, guanyl releasing protein 2	Multiple_Complex	9.83	0.0011	0.0222			T
TC0400003206.mm.1	1.5	T	Ttc4	tetratricopeptide repeat domain 4	Multiple_Complex	9.82	0.0025	0.0391	Alternative 5' Donor Site	0.37	T
TC1100001899.mm.1	-4.8	T	Nup85	nucleoporin 85	Multiple_Complex	9.82	0.0023	0.0376	Intron Retention	0.31	T
TC1500001136.mm.1	4.64	T	Ghr	growth hormone receptor	Multiple_Complex	9.82	0.0016	0.0283			T
TC1900000838.mm.1	-1.04	T	Pnlip	pancreatic lipase	Coding	9.82	0.0003	0.0085			T
TC1800001322.mm.1	13.64	T	C030005K06Rik; AC120859.3	RIKEN cDNA C030005K06 gene [Source:MGI Symbol;Acc:MGI:1925945]; novel transcript	NonCoding	9.81	2.76e-05	0.0014	Intron Retention	0.27	T
TC0700004292.mm.1	1.38	T	Slx1b	SLX1 structure-specific endonuclease subunit homolog B (S. cerevisiae)	Multiple_Complex	9.8	9.92e-06	0.0007			T
TC0500001344.mm.1	1.78	T	Rasal1	RAS protein activator like 1 (GAP1 like); RAS protein activator like 1 (GAP1 like) (Rasal1), mRNA.	Multiple_Complex	9.8	1.27e-05	0.0008	Cassette Exon	0.21	T
TC0400003584.mm.1	1.09	T	Hpca	hippocalcin	Coding	9.79	2.3e-05	0.0012			T
TC0600000948.mm.1	-1.01	T	Dysf	dysferlin; dysferlin (Dysf), transcript variant 1, mRNA.	Multiple_Complex	9.79	2.78e-06	0.0003			T
TC1500000591.mm.1	1.32	T	Mroh1; Mir6954	maestro heat-like repeat family member 1; microRNA 6954	Multiple_Complex	9.79	5.08e-08	1.41e-05			T
TC0500002343.mm.1	18.24	T	Qdpr	quinoid dihydropteridine reductase	Multiple_Complex	9.79	1.03e-05	0.0007			T
TC0300002273.mm.1	-3.09	T	Dclk2	doublecortin-like kinase 2	Multiple_Complex	9.78	8.61e-05	0.0033			T
TC0800001594.mm.1	4.95	T	Nrp1; Mir1903	neuropilin 1; microRNA 1903	Multiple_Complex	9.78	0.0002	0.0068	Cassette Exon	0.24	T
TC1600000918.mm.1	52.11	T	Ncam2	neural cell adhesion molecule 2	Coding	9.77	0.0031	0.0457	Cassette Exon	0.2	T
TC1300000280.mm.1	-3.36	T	Tdp2	tyrosyl-DNA phosphodiesterase 2	Multiple_Complex	9.77	0.0005	0.0126			T
TC0100002796.mm.1	1.11	T	Gm17090; RP24-500O1.1	predicted gene 17090 [Source:MGI Symbol;Acc:MGI:4937917]; novel transcript	NonCoding	9.76	0.0022	0.0354			T
TC1200001882.mm.1	-4.61	T	Nin	ninein; ninein (Nin), transcript variant 2, mRNA.	Multiple_Complex	9.76	0.0014	0.0263			T
TC1700000626.mm.1	-1.2	T	Gm20506; RP23-123G8.18	predicted gene 20506 [Source:MGI Symbol;Acc:MGI:5141971]; novel transcript	NonCoding	9.76	0.0026	0.0403			T
TC0200004532.mm.1	1.11	T	Fam227b	family with sequence similarity 227, member B	Multiple_Complex	9.75	9.54e-05	0.0036			T
TC0200000651.mm.1	-1.04	T	Ptgs1	prostaglandin-endoperoxide synthase 1	Multiple_Complex	9.75	0.0033	0.0482	Cassette Exon	0.25	T
TC0400003896.mm.1	-1.09	T	Fhad1	forkhead-associated (FHA) phosphopeptide binding domain 1	Multiple_Complex	9.74	0.0013	0.0244			T
TC0100002534.mm.1	1.26	T	Ikzf2	IKAROS family zinc finger 2	Multiple_Complex	9.74	0.001	0.0197			T
TC1500000875.mm.1	-4.53	T	Mapk8ip2	mitogen-activated protein kinase 8 interacting protein 2	Coding	9.74	6.5e-05	0.0027			T
TC0200005031.mm.1	2.12	T	D630003M21Rik	RIKEN cDNA D630003M21 gene	Coding	9.74	3.8e-05	0.0018			T
TC0500000174.mm.1	-3.41	T	Armc10	armadillo repeat containing 10	Multiple_Complex	9.74	0.0009	0.0192	Intron Retention	0.48	T
TC1100002155.mm.1	-7.08	T	Pold2	polymerase (DNA directed), delta 2, regulatory subunit	Multiple_Complex	9.73	4.51e-06	0.0004	Alternative 3' Acceptor Site	0.28	T
TC1100003780.mm.1	-2.25	T	Kat2a	K(lysine) acetyltransferase 2A	Multiple_Complex	9.73	3.23e-05	0.0016			T
TC0100000517.mm.1	1.72	T	Ino80dos	INO80 complex subunit D, opposite strand	NonCoding	9.73	0.0031	0.0454			T
TC0400004191.mm.1	91.92	T	Slc6a9	solute carrier family 6 (neurotransmitter transporter, glycine), member 9	Multiple_Complex	9.73	2.48e-05	0.0013	Cassette Exon	0.2	T
TC0700003770.mm.1	-1.55	T	Myo7a	myosin VIIA; Synthetic construct Mus musculus clone IMAGE:100069489, MGC:199391 myosin VIIA (Myo7a) mRNA, encodes complete protein.	Multiple_Complex	9.72	0.0017	0.0294			T
TC1400000912.mm.1	1.36	T	Sox7	SRY (sex determining region Y)-box 7; SRY-box containing gene 7	Coding	9.71	0.003	0.0448	Alternative 5' Donor Site	0.27	T
TC0300000902.mm.1	1.52	T	Ctsk	cathepsin K	Coding	9.71	0.0001	0.0039	Cassette Exon	0.21	T
TC0800000148.mm.1	15.05	T	Arhgef10	Rho guanine nucleotide exchange factor (GEF) 10	Multiple_Complex	9.71	5.39e-05	0.0023	Cassette Exon	0.32	T
TC0700002102.mm.1	1.66	T	Dhcr7	7-dehydrocholesterol reductase	Multiple_Complex	9.71	0.0007	0.0153	Cassette Exon	0.29	T
TC1700000106.mm.1	3.47	T	A230009B12Rik	RIKEN cDNA A230009B12 gene	NonCoding	9.7	0.0006	0.0143			T
TC1700001781.mm.1	-1.64	T	Ppil1	peptidylprolyl isomerase (cyclophilin)-like 1	Multiple_Complex	9.69	0.001	0.0205			T
TC1100001721.mm.1	1.96	T	Wnt3	wingless-type MMTV integration site family, member 3; wingless-related MMTV integration site 3	Coding	9.69	8.21e-10	8.01e-07	Alternative 5' Donor Site	0.27	T
TC0500001432.mm.1	2.76	T	Hip1r	huntingtin interacting protein 1 related	Multiple_Complex	9.69	0.0007	0.0155	Cassette Exon	0.22	T
TC1000001579.mm.1	-17.19	T	Prim1	DNA primase, p49 subunit; DNA primase, p49 subunit (Prim1), mRNA.	Multiple_Complex	9.68	0.0015	0.0269	Intron Retention	0.36	T
TC1100004151.mm.1	-1.03	T	Dnah17	dynein, axonemal, heavy chain 17	Coding	9.68	1.57e-07	3.12e-05			T
TC0100003876.mm.1	-10.56	T	Tex30	testis expressed 30	Multiple_Complex	9.67	1.59e-06	0.0002	Intron Retention	0.21	T
TC1100001329.mm.1	-8.26	T	Ska2	spindle and kinetochore associated complex subunit 2	Multiple_Complex	9.66	0.002	0.0337			T
TC1400000999.mm.1	262.48	T	Lgi3	leucine-rich repeat LGI family, member 3	Coding	9.66	9.31e-05	0.0035			T
TC0400002268.mm.1	-2.24	T	Cpne3	copine III	Multiple_Complex	9.66	0.001	0.0204	Alternative 3' Acceptor Site	0.27	T
TC1500002142.mm.1	-1.87	T	Slc38a2	solute carrier family 38, member 2	Multiple_Complex	9.65	0.0002	0.0058			T
TC0700004093.mm.1	-1.12	T			NonCoding	9.65	1.95e-05	0.0011			T
TC1700000998.mm.1	-1.19	T	Hdgfrp2	hepatoma-derived growth factor, related protein 2	Coding	9.64	0.0015	0.0278			T
TC1900000061.mm.1	-1.08	T	Catsper1	cation channel, sperm associated 1; Synthetic construct Mus musculus clone IMAGE:100015059, MGC:180354 cation channel, sperm associated 1 (Catsper1) mRNA, encodes complete protein.	Coding	9.63	0.0028	0.0422			T
TC1100001371.mm.1	-1.08	T			NonCoding	9.63	2.5e-05	0.0013			T
TC0800000655.mm.1	-1.06	T	Cbr4	carbonyl reductase 4	Multiple_Complex	9.61	1.57e-05	0.0009	Intron Retention	0.22	T
TC0300001061.mm.1	1.8	T	Ap4b1	adaptor-related protein complex AP-4, beta 1	Coding	9.6	3.17e-05	0.0016			T
TC1600001395.mm.1	3.01	T	Masp1	mannan-binding lectin serine peptidase 1	Coding	9.59	4.76e-06	0.0004			T
TC0600003116.mm.1	1.31	T	Eno2	enolase 2, gamma neuronal	Multiple_Complex	9.58	0.0001	0.004			T
TC0800001481.mm.1	3.21	T	Zfpm1	zinc finger protein, multitype 1	Multiple_Complex	9.57	3.68e-06	0.0003	Cassette Exon	0.36	T
TC0100000320.mm.1	1.01	T	AI597479	expressed sequence AI597479	Multiple_Complex	9.57	0.0004	0.0101			T
TC0100001271.mm.1	-9.28	T	Kif14	kinesin family member 14	Coding	9.57	5.83e-06	0.0004			T
TC1100000647.mm.1	-6.27	T	G3bp1	GTPase activating protein (SH3 domain) binding protein 1	Multiple_Complex	9.56	9.07e-05	0.0035			T
TC1000002497.mm.1	1.57	T	Adamtsl5	ADAMTS-like 5	Multiple_Complex	9.56	2.42e-05	0.0013	Alternative 3' Acceptor Site	0.22	T
TC0400002505.mm.1	1.04	T	Ccl19	chemokine (C-C motif) ligand 19; chemokine (C-C motif) ligand 19, mRNA (cDNA clone MGC:62903 IMAGE:1349213), complete cds.	Multiple_Complex	9.56	0.0034	0.0486	Alternative 3' Acceptor Site	0.27	T
TC1900000774.mm.1	1.09	T	Tectb; Mir6715	tectorin beta; microRNA 6715	Multiple_Complex	9.54	5.83e-08	1.56e-05			T
TC0300001161.mm.1	3.01	T	Vav3	vav 3 oncogene	Multiple_Complex	9.54	0.0002	0.0071			T
TC1100000853.mm.1	-1.04	T	Myh2	myosin, heavy polypeptide 2, skeletal muscle, adult	Multiple_Complex	9.54	9.6e-06	0.0006			T
TC1900001213.mm.1	-1.66	T	Vps13a	vacuolar protein sorting 13A (yeast)	Multiple_Complex	9.53	0.0002	0.0068			T
TC0800002856.mm.1	1.1	T	Smpd3	sphingomyelin phosphodiesterase 3, neutral	Multiple_Complex	9.53	9.08e-05	0.0035	Cassette Exon	0.29	T
TC0200004308.mm.1	1.95	T	Bbox1	butyrobetaine (gamma), 2-oxoglutarate dioxygenase 1 (gamma-butyrobetaine hydroxylase)	Coding	9.53	3.49e-05	0.0017			T
TC1200001324.mm.1	-5.13	T	Cdca7l	cell division cycle associated 7 like	Multiple_Complex	9.52	5.21e-06	0.0004			T
TC0700000486.mm.1	1.01	T	9530053A07Rik	RIKEN cDNA 9530053A07 gene; Synthetic construct Mus musculus clone IMAGE:100016454, MGC:184505 RIKEN cDNA 9530053A07 gene (9530053A07Rik) mRNA, encodes complete protein.	Multiple_Complex	9.52	6.81e-05	0.0028			T
TC1200001988.mm.1	-1.79	T	Zfp36l1	zinc finger protein 36, C3H type-like 1	Multiple_Complex	9.51	0.0001	0.0039	Alternative 5' Donor Site	0.31	T
TC0800003007.mm.1	-1.17	T	1700030J22Rik	RIKEN cDNA 1700030J22 gene	Coding	9.5	0.0002	0.0054			T
TC0400003088.mm.1	22.18	T	Cyp2j12	cytochrome P450, family 2, subfamily j, polypeptide 12	Coding	9.5	1.1e-05	0.0007			T
TC0X00001323.mm.1	-7.27	T	Ngfrap1	nerve growth factor receptor (TNFRSF16) associated protein 1	Coding	9.5	1.12e-07	2.46e-05	Alternative 3' Acceptor Site	0.24	T
TC1400000326.mm.1	-4.85	T	Bap1	Brca1 associated protein 1	Coding	9.49	7.46e-05	0.003	Alternative 3' Acceptor Site	0.25	T
TC1200001770.mm.1	1.35	T	Ralgapa1	Ral GTPase activating protein, alpha subunit 1; Ral GTPase activating protein, alpha subunit 1 (Ralgapa1), transcript variant 3, mRNA.; Ral GTPase activating protein, alpha subunit 1 (Ralgapa1), transcript variant 1, mRNA.	Multiple_Complex	9.49	0.0002	0.0071	Alternative 5' Donor Site	0.46	T
TC1000000789.mm.1	2.76	T	Ilvbl	ilvB (bacterial acetolactate synthase)-like	Coding	9.49	6.67e-05	0.0027	Cassette Exon	0.34	T
TC0400002244.mm.1	1.45	T	Decr1	2,4-dienoyl CoA reductase 1, mitochondrial	Multiple_Complex	9.49	0.0035	0.0496			T
TC0400003746.mm.1	1.72	T	Ldlrap1	low density lipoprotein receptor adaptor protein 1	Multiple_Complex	9.48	6.49e-05	0.0027			T
TC0400000705.mm.1	-1.38	T	Rgs3	regulator of G-protein signaling 3	Multiple_Complex	9.48	2.14e-05	0.0012	Alternative 3' Acceptor Site	0.29	T
TC1800001507.mm.1	2.08	T	Spire1	spire homolog 1 (Drosophila)	Multiple_Complex	9.48	0.0031	0.0458	Alternative 3' Acceptor Site	0.21	T
TC1100000730.mm.1	1.06	T	Mprip	myosin phosphatase Rho interacting protein	Multiple_Complex	9.47	3.12e-06	0.0003	Cassette Exon	0.34	T
TC1900000767.mm.1	1.95	T	Adra2a	adrenergic receptor, alpha 2a	Coding	9.47	1.25e-05	0.0008			T
TC0100000255.mm.1	-1.01	T	Zap70	zeta-chain (TCR) associated protein kinase; zeta-chain (TCR) associated protein kinase (Zap70), mRNA.	Coding	9.46	2.14e-08	7.51e-06			T
TC0200003231.mm.1	2.72	T	1700007K13Rik	RIKEN cDNA 1700007K13 gene	Multiple_Complex	9.46	0.0032	0.0471			T
TC1300001006.mm.1	23.71	T	Hapln1	hyaluronan and proteoglycan link protein 1	Multiple_Complex	9.46	7.15e-05	0.0029	Cassette Exon	0.27	T
TC0700002174.mm.1	1.04	T	Shisa7	shisa family member 7; shisa homolog 7 (Xenopus laevis)	Multiple_Complex	9.45	0.0028	0.0422			T
TC0700000241.mm.1	4.66	T	Gng8	guanine nucleotide binding protein (G protein), gamma 8	Coding	9.44	2.74e-05	0.0014			T
TC0700001893.mm.1	-1.8	T	Sec23ip	Sec23 interacting protein	Coding	9.43	0.0015	0.0274			T
TC0200002850.mm.1	-6.54	T	Suv39h2	suppressor of variegation 3-9 homolog 2 (Drosophila)	Multiple_Complex	9.43	5.41e-07	7.64e-05			T
TC0100000338.mm.1	4.67	T	Gulp1	GULP, engulfment adaptor PTB domain containing 1	Multiple_Complex	9.41	5.27e-05	0.0023			T
TC0300000224.mm.1	5.69	T	Mfn1	mitofusin 1	Multiple_Complex	9.41	0.0024	0.0384			T
TC1300002520.mm.1	-5.48	T	Map1b	microtubule-associated protein 1B	Multiple_Complex	9.41	0.0001	0.0038			T
TC1900000127.mm.1	-41.46	T	Ppp1r14b	protein phosphatase 1, regulatory (inhibitor) subunit 14B	Coding	9.4	1.49e-05	0.0009	Cassette Exon	0.23	T
TC1100001702.mm.1	1.03	T	Fam187a; Ccdc103	family with sequence similarity 187, member A; coiled-coil domain containing 103	Coding	9.4	0.0032	0.0467			T
TC1300002031.mm.1	-4.04	T	Thoc3	THO complex 3	Multiple_Complex	9.4	0.0016	0.0287			T
TC1900000913.mm.1	2.78	T	Ssh3	slingshot homolog 3 (Drosophila)	Coding	9.4	5.05e-06	0.0004			T
TC1000000045.mm.1	-3.68	T	Lrp11	low density lipoprotein receptor-related protein 11	Coding	9.4	0.0023	0.0373			T
TC0600001083.mm.1	-3.78	T	Fbln2	fibulin 2	Multiple_Complex	9.4	0.0002	0.0068			T
TC0200001749.mm.1	4.14	T	Ivd	isovaleryl coenzyme A dehydrogenase	Multiple_Complex	9.4	9.56e-05	0.0036	Cassette Exon	0.36	T
TC0600001293.mm.1	6.75	T	Fam21	family with sequence similarity 21	Coding	9.39	0.0002	0.0056			T
TC0100001836.mm.1	-10.18	T	Nsl1	NSL1, MIND kinetochore complex component, homolog (S. cerevisiae)	Coding	9.38	0.0026	0.0406			T
TC1100003219.mm.1	-1.24	T			NonCoding	9.38	0.0025	0.0398			T
TC1000001906.mm.1	1.9	T			NonCoding	9.38	9.78e-05	0.0037			T
TC1000000131.mm.1	2.11	T	Nhsl1	NHS-like 1	Multiple_Complex	9.38	6.03e-08	1.59e-05			T
TC1500000062.mm.1	4.34	T	Ranbp3l	RAN binding protein 3-like; RAN binding protein 3-like (Ranbp3l), mRNA.	Coding	9.37	0.0009	0.0193			T
TC0900001453.mm.1	-11.45	T	Smarcc1	SWI/SNF related, matrix associated, actin dependent regulator of chromatin, subfamily c, member 1	Multiple_Complex	9.37	5.4e-05	0.0023	Alternative 5' Donor Site	0.23	T
TC1700001315.mm.1	-12.08	T	Msh6	mutS homolog 6 (E. coli)	Coding	9.37	1.66e-07	3.27e-05			T
TC1500002181.mm.1	-1.32	T	Adcy6	adenylate cyclase 6; Synthetic construct Mus musculus clone IMAGE:100063597, MGC:191103 adenylate cyclase 6 (Adcy6) mRNA, encodes complete protein.	Coding	9.37	3.23e-05	0.0016			T
TC0400002949.mm.1	-5.22	T	Psip1	PC4 and SFRS1 interacting protein 1	Multiple_Complex	9.36	0.0004	0.0112	Alternative 3' Acceptor Site	0.26	T
TC1100003664.mm.1	1.87	T	Cacnb1	calcium channel, voltage-dependent, beta 1 subunit	Multiple_Complex	9.36	0.0001	0.0045			T
TC0200001158.mm.1	1.13	T	Itga4	integrin alpha 4	Multiple_Complex	9.35	0.0001	0.0038			T
TC1600000220.mm.1	1.59	T	P2rx6	purinergic receptor P2X, ligand-gated ion channel, 6	Multiple_Complex	9.35	0.0012	0.0235			T
TC1300000482.mm.1	4.42	T	Phactr1	phosphatase and actin regulator 1; phosphatase and actin regulator 1 (Phactr1), transcript variant 1, mRNA.	Multiple_Complex	9.34	5.65e-05	0.0024	Cassette Exon	0.26	T
TC0500001725.mm.1	-1.07	T	Spdye4b	speedy/RINGO cell cycle regulator family, member E4B	Coding	9.34	0.0001	0.0039			T
TC0200001472.mm.1	15.07	T	Lrrc4c	leucine rich repeat containing 4C	Multiple_Complex	9.34	0.0006	0.0146	Cassette Exon	0.24	T
TC0100002257.mm.1	-1.22	T	Pantr1	POU domain, class 3, transcription factor 3 adjacent noncoding transcript 1	NonCoding	9.33	0.0017	0.0297			T
TC1600001304.mm.1	19.09	T	Prodh	proline dehydrogenase	Multiple_Complex	9.33	9.41e-05	0.0036			T
TC1400002759.mm.1	1.32	T	Nalcn	sodium leak channel, non-selective	Multiple_Complex	9.32	0.002	0.0338			T
TC0X00001634.mm.1	-1.36	T	Phka2	phosphorylase kinase alpha 2	Multiple_Complex	9.32	0.0002	0.0052			T
TC1300002064.mm.1	1.81	T	Fam193b	family with sequence similarity 193, member B	Coding	9.32	0.0034	0.0486			T
TC1700002801.mm.1	1.78	T	Rhbdl1	rhomboid, veinlet-like 1 (Drosophila)	Coding	9.32	7.8e-05	0.0031	Cassette Exon	0.24	T
TC1300000432.mm.1	3.24	T	Rreb1	ras responsive element binding protein 1	Multiple_Complex	9.32	0.0033	0.048			T
TC0200000240.mm.1	-11.59	T	Vim	vimentin	Multiple_Complex	9.31	1.68e-06	0.0002	Intron Retention	0.25	T
TC0300001382.mm.1	4.77	T	Ppp3ca	protein phosphatase 3, catalytic subunit, alpha isoform	Multiple_Complex	9.31	0.0033	0.0482			T
TC1100001580.mm.1	2.57	T	Thra	thyroid hormone receptor alpha	Multiple_Complex	9.3	0.0003	0.0093	Alternative 5' Donor Site	0.26	T
TC1800001384.mm.1	1.19	T	Fbn2	fibrillin 2	Multiple_Complex	9.3	0.0014	0.0265			T
TC0700002714.mm.1	-1.02	T	Fam98c	family with sequence similarity 98, member C	Multiple_Complex	9.29	0.0009	0.0194	Alternative 5' Donor Site	0.27	T
TC1400002631.mm.1	-1.05	T			NonCoding	9.29	0.0004	0.0106			T
TC0X00001781.mm.1	-1.02	T	Magix	MAGI family member, X-linked	Multiple_Complex	9.27	1.36e-07	2.85e-05			T
TC0X00000934.mm.1	-10.42	T	Efnb1	ephrin B1	Multiple_Complex	9.26	0.0004	0.0113			T
TC1100000903.mm.1	-1.08	T	Alox12b	arachidonate 12-lipoxygenase, 12R type	Coding	9.26	1.66e-05	0.001			T
TC0600003460.mm.1	1.87	T	Tmtc1	transmembrane and tetratricopeptide repeat containing 1	Multiple_Complex	9.24	0.003	0.0446			T
TC0200001203.mm.1	4.11	T	Itgav	integrin alpha V; Synthetic construct Mus musculus clone IMAGE:100068082, MGC:195699 integrin alpha V (Itgav) mRNA, encodes complete protein.	Multiple_Complex	9.24	0.0011	0.022			T
TC0200001362.mm.1	-2.29	T	Celf1	CUGBP, Elav-like family member 1	Multiple_Complex	9.23	0.0013	0.0246			T
TC0800000693.mm.1	3.31	T	Nat1	N-acetyl transferase 1	Coding	9.23	1.17e-06	0.0001	Alternative 5' Donor Site	0.27	T
TC0900000203.mm.1	-5.82	T	Smarca4	SWI/SNF related, matrix associated, actin dependent regulator of chromatin, subfamily a, member 4	Multiple_Complex	9.22	1.19e-06	0.0001			T
TC1900000011.mm.1	1.59	T	Mtl5	metallothionein-like 5, testis-specific (tesmin)	Coding	9.22	0.0008	0.0171	Alternative 5' Donor Site	0.26	T
TC1400000341.mm.1	1.52	T	Parg	poly (ADP-ribose) glycohydrolase; Synthetic construct Mus musculus clone IMAGE:100064036, MGC:193407 poly (ADP-ribose) glycohydrolase (Parg) mRNA, encodes complete protein.	Multiple_Complex	9.22	0.0014	0.026			T
TC0300003208.mm.1	1.11	T	Fgf2	fibroblast growth factor 2; Synthetic construct Mus musculus clone IMAGE:100062861, MGC:190976 fibroblast growth factor 2 (Fgf2) mRNA, encodes complete protein.	Multiple_Complex	9.21	0.0002	0.0063			T
TC0X00001637.mm.1	-6.05	T	Scml2	sex comb on midleg-like 2 (Drosophila) (Scml2), mRNA.; sex comb on midleg-like 2 (Drosophila)	Multiple_Complex	9.21	3.8e-05	0.0018	Cassette Exon	0.25	T
TC0300002156.mm.1	1.13	T	Bche	butyrylcholinesterase	Multiple_Complex	9.21	4.42e-06	0.0004			T
TC1400000765.mm.1	7.62	T			NonCoding	9.2	3.49e-08	1.07e-05			T
TC1900000054.mm.1	-1.03	T	Rin1	Ras and Rab interactor 1	Coding	9.19	8.31e-07	0.0001			T
TC0600001320.mm.1	1.93	T	Zfp239	zinc finger protein 239	Multiple_Complex	9.18	0.0007	0.0155	Cassette Exon	0.21	T
TC0800000196.mm.1	2.69	T	4930467E23Rik; Gm21119; Gm15319	RIKEN cDNA 4930467E23 gene; predicted gene, 21119; predicted gene 15319	Coding	9.18	0.002	0.0337			T
TC1100004157.mm.1	6.31	T	Timp2	tissue inhibitor of metalloproteinase 2	Coding	9.18	0.0016	0.0284			T
TC1400000517.mm.1	2.04	T	Ktn1	kinectin 1; Synthetic construct Mus musculus clone IMAGE:100069520, MGC:199422 kinectin 1 (Ktn1) mRNA, encodes complete protein.	Coding	9.17	0.0002	0.0064			T
TC1700002789.mm.1	-1.16	T	H2-Q7; H2-Q9	histocompatibility 2, Q region locus 7; histocompatibility 2, Q region locus 9	Multiple_Complex	9.17	2.88e-05	0.0015			T
TC0700000655.mm.1	259.88	T	Slc7a10	solute carrier family 7 (cationic amino acid transporter, y+ system), member 10	Multiple_Complex	9.17	0.0017	0.0299			T
TC0400002469.mm.1	34.12	T	AI464131	expressed sequence AI464131	Coding	9.17	2.27e-05	0.0012	Cassette Exon	0.21	T
TC0900002764.mm.1	2.28	T	Hmgn3	high mobility group nucleosomal binding domain 3	Multiple_Complex	9.17	0.0012	0.0228	Intron Retention	0.27	T
TC1200000079.mm.1	-1.07	T			NonCoding	9.17	7.62e-05	0.003			T
TC1300000506.mm.1	3.39	T	Gm5083	predicted gene 5083	NonCoding	9.16	2.94e-06	0.0003			T
TC0600002941.mm.1	1.03	T	Vgll4	vestigial like 4 (Drosophila)	Multiple_Complex	9.16	5.17e-05	0.0023			T
TC1500001128.mm.1	-1.83	T	Copz1	coatomer protein complex, subunit zeta 1	Coding	9.16	5.61e-05	0.0024	Intron Retention	0.53	T
TC1600000650.mm.1	-6.28	T	Naa50	N(alpha)-acetyltransferase 50, NatE catalytic subunit	Multiple_Complex	9.16	5.82e-06	0.0004	Cassette Exon	0.28	T
TC0500000356.mm.1	-1.5	T	Maea	macrophage erythroblast attacher	Coding	9.15	3.64e-05	0.0017			T
TC1100003584.mm.1	1.04	T	Itga3	integrin alpha 3	Multiple_Complex	9.15	1e-07	2.29e-05			T
TC0900000117.mm.1	-6.06	T	Taf1d; Gm25500	TATA box binding protein (Tbp)-associated factor, RNA polymerase I, D; predicted gene, 25500	Multiple_Complex	9.15	1.29e-06	0.0001			T
TC0300000457.mm.1	-1.58	T	Eif2a	eukaryotic translation initiation factor 2A	Multiple_Complex	9.15	0.0022	0.0363			T
TC0500000527.mm.1	1.98	T	Sod3	superoxide dismutase 3, extracellular	Coding	9.14	4.19e-06	0.0003			T
TC0200003151.mm.1	82.2	T	Ptgds	prostaglandin D2 synthase (brain)	Multiple_Complex	9.13	0.0013	0.0251			T
TC1100001642.mm.1	-5.38	T	Tubg1	tubulin, gamma 1	Multiple_Complex	9.13	4.79e-06	0.0004	Alternative 5' Donor Site	0.34	T
TC0700001939.mm.1	1.02	T	Lhpp	phospholysine phosphohistidine inorganic pyrophosphate phosphatase	Multiple_Complex	9.13	4.48e-09	2.54e-06	Alternative 5' Donor Site	0.33	T
TC0100000048.mm.1	-1.35	T	Cspp1	centrosome and spindle pole associated protein 1	Multiple_Complex	9.13	0.0007	0.016			T
TC1100000028.mm.1	-4.1	T	Pes1	pescadillo homolog 1, containing BRCT domain (zebrafish)	Multiple_Complex	9.12	4.92e-05	0.0022	Alternative 5' Donor Site	0.29	T
TC0700001948.mm.1	-3.86	T	Bccip	BRCA2 and CDKN1A interacting protein	Multiple_Complex	9.12	4.59e-05	0.0021	Alternative 5' Donor Site	0.31	T
TC0300001830.mm.1	7.6	T	Gm20515; RP24-396D16.1	predicted gene 20515 [Source:MGI Symbol;Acc:MGI:5141980]; Novel transcript	NonCoding	9.12	4.2e-05	0.0019	Intron Retention	0.41	T
TC0200004062.mm.1	1.01	T	Olfr1243	olfactory receptor 1243	Multiple_Complex	9.12	0.0003	0.0075			T
TC0200002478.mm.1	-8.81	T	Mybl2	myeloblastosis oncogene-like 2	Multiple_Complex	9.12	1.41e-05	0.0009			T
TC0900001442.mm.1	-11.15	T	Cdc25a	cell division cycle 25A	Coding	9.11	6.91e-06	0.0005			T
TC1700002154.mm.1	1.1	T	Capn11	calpain 11; Synthetic construct Mus musculus clone IMAGE:100016544, MGC:184590 calpain 11 (Capn11) mRNA, encodes complete protein.	Coding	9.08	0.0004	0.0111			T
TC1700002808.mm.1	-4.01	T	Hnrnpm	heterogeneous nuclear ribonucleoprotein M	Multiple_Complex	9.08	8.1e-07	0.0001	Alternative 3' Acceptor Site	0.42	T
TC1100002754.mm.1	4.99	T	Slc22a4	solute carrier family 22 (organic cation transporter), member 4	Multiple_Complex	9.08	2.03e-05	0.0011	Cassette Exon	0.26	T
TC0500000636.mm.1	6.83	T	Nsun7	NOL1/NOP2/Sun domain family, member 7	Multiple_Complex	9.08	0.0005	0.0127	Cassette Exon	0.21	T
TC1100003141.mm.1	9.86	T	Slc13a5	solute carrier family 13 (sodium-dependent citrate transporter), member 5; Synthetic construct Mus musculus clone IMAGE:100062711, MGC:190938 solute carrier family 13 (sodium-dependent citrate transporter), member 5 (Slc13a5) mRNA, encodes complete protein.	Coding	9.07	7.06e-05	0.0029			T
TC0300002611.mm.1	1.41	T	Slc22a15	solute carrier family 22 (organic anion/cation transporter), member 15	Multiple_Complex	9.07	0.0002	0.0069			T
TC1400002058.mm.1	-12.12	T	Haus4	HAUS augmin-like complex, subunit 4	Coding	9.06	7.28e-09	3.55e-06			T
TC1300001033.mm.1	-16.78	T	Dhfr	dihydrofolate reductase	Multiple_Complex	9.06	2.13e-06	0.0002	Alternative 3' Acceptor Site	0.23	T
TC1500002209.mm.1	-2.8	T	Fmnl3	formin-like 3	Multiple_Complex	9.06	1.61e-06	0.0002			T
TC0X00002751.mm.1	12.26	T	Phka1	phosphorylase kinase alpha 1; Synthetic construct Mus musculus clone IMAGE:100066325, MGC:195462 phosphorylase kinase alpha 1 (Phka1) mRNA, encodes complete protein.	Multiple_Complex	9.06	0.0004	0.0095	Alternative 5' Donor Site	0.28	T
TC1700000917.mm.1	-1.49	T	Ccnd3	cyclin D3	Multiple_Complex	9.05	0.0014	0.0257			T
TC1600000528.mm.1	1.38	T	Golgb1	golgi autoantigen, golgin subfamily b, macrogolgin 1	Multiple_Complex	9.05	0.0004	0.0107	Cassette Exon	0.34	T
TC0500001103.mm.1	-1.03	T	Pde6b	phosphodiesterase 6B, cGMP, rod receptor, beta polypeptide	Multiple_Complex	9.04	0.0017	0.0297			T
TC1800000805.mm.1	1.96	T	Smad7	SMAD family member 7; SMAD family member 7 (Smad7), mRNA.	Multiple_Complex	9.03	4.32e-06	0.0004			T
TC0400001814.mm.1	1.02	T			NonCoding	9.03	1.23e-05	0.0008			T
TC1400002788.mm.1	-4.33	T	Gm5796; Gm3095; Gm8108	predicted gene 5796; predicted gene 3095; predicted gene 8108	Coding	9.03	2.11e-06	0.0002			T
TC1000002046.mm.1	-1.66	T	Cdc40	cell division cycle 40	Coding	9.03	0.0025	0.0395	Alternative 5' Donor Site	0.27	T
TC0400000168.mm.1	2.39	T	Ttpa	tocopherol (alpha) transfer protein	Coding	9.03	6.79e-07	8.97e-05	Alternative 5' Donor Site	0.23	T
TC1500002346.mm.1	1.19	T	Plec	plectin	Coding	9.02	4.4e-05	0.002			T
TC0200002427.mm.1	1.27	T	Snhg11	small nucleolar RNA host gene 11	Multiple_Complex	9.02	0.0034	0.0489			T
TC0300000419.mm.1	3.95	T	Dclk1	doublecortin-like kinase 1	Multiple_Complex	9.01	0.0003	0.0081			T
TC0400003886.mm.1	1.45	T	Tmem82	transmembrane protein 82	Multiple_Complex	9.01	1.78e-05	0.001			T
TC1700001827.mm.1	-9.5	T	Sik1	salt inducible kinase 1; Synthetic construct Mus musculus clone IMAGE:100014913, MGC:180307 salt inducible kinase 1 (Sik1) mRNA, encodes complete protein.	Multiple_Complex	9.01	0.0001	0.0043	Alternative 5' Donor Site	0.25	T
TC1400001687.mm.1	2.61	T	Ankrd28	ankyrin repeat domain 28	Multiple_Complex	9	0.0009	0.0189			T
TC0700004619.mm.1	2.12	T	Tmem147os; Gm26935; RP23-72M20.5; RP23-72M20.6; C630016N16Rik	transmembrane protein 147, opposite strand [Source:MGI Symbol;Acc:MGI:3642392]; predicted gene, 26935 [Source:MGI Symbol;Acc:MGI:5504050]; novel transcript, antisense to Gapdhs; RIKEN cDNA C630016N16 gene	NonCoding	8.99	0.0009	0.0192			T
TC0500002827.mm.1	-8.02	T	Hnrnpd	heterogeneous nuclear ribonucleoprotein D	Multiple_Complex	8.99	1.26e-07	2.69e-05	Cassette Exon	0.23	T
TC1600000834.mm.1	7.4	T	Robo1	roundabout homolog 1 (Drosophila); Synthetic construct Mus musculus clone IMAGE:100068119, MGC:195736 roundabout homolog 1 (Drosophila) (Robo1) mRNA, encodes complete protein.	Multiple_Complex	8.98	0.0007	0.0162			T
TC0400002467.mm.1	-6.74	T	Kif24	kinesin family member 24	Multiple_Complex	8.98	4.56e-05	0.0021	Alternative 5' Donor Site	0.35	T
TC0500002865.mm.1	5.84	T	Mapk10	mitogen-activated protein kinase 10; mitogen activated protein kinase 10	Multiple_Complex	8.97	0.0026	0.0409			T
TC0200000804.mm.1	12.26	T	Lypd6	LY6/PLAUR domain containing 6	Multiple_Complex	8.97	0.0033	0.0473			T
TC1300001330.mm.1	1.3	T	Hcn1	hyperpolarization-activated, cyclic nucleotide-gated K+ 1	Multiple_Complex	8.97	0.0002	0.0069			T
TC1900000881.mm.1	-1.23	T	Ppp6r3	protein phosphatase 6, regulatory subunit 3	Multiple_Complex	8.97	0.0015	0.0268	Intron Retention	0.54	T
TC1900000141.mm.1	35.45	T	Pla2g16	phospholipase A2, group XVI	Multiple_Complex	8.97	0.0035	0.0495			T
TC1100002480.mm.1	1.09	T	Smim23	small integral membrane protein 23	Coding	8.96	2.16e-05	0.0012			T
TC0100000465.mm.1	1.14	T	Carf	calcium response factor; calcium response factor (Carf), mRNA.	Multiple_Complex	8.96	0.0009	0.019			T
TC1500001927.mm.1	-12.78	T	Rangap1	RAN GTPase activating protein 1	Coding	8.95	0.0003	0.0078			T
TC1500002212.mm.1	-1.56	T	Nckap5l	NCK-associated protein 5-like	Multiple_Complex	8.95	0.002	0.0341			T
TC1100002725.mm.1	-6.49	T	Hspa4	heat shock protein 4	Multiple_Complex	8.95	0.0018	0.0314	Alternative 3' Acceptor Site	0.25	T
TC1200002405.mm.1	4.74	T			NonCoding	8.95	0.0001	0.0047	Cassette Exon	0.35	T
TC0200001735.mm.1	1.15	T	Eif2ak4	eukaryotic translation initiation factor 2 alpha kinase 4	Multiple_Complex	8.94	0.0016	0.0281			T
TC0500001221.mm.1	2.41	T	Acacb	acetyl-Coenzyme A carboxylase beta	Multiple_Complex	8.94	9.91e-05	0.0037			T
TC1500000826.mm.1	-13.42	T	Gtse1	G two S phase expressed protein 1	Coding	8.93	2.24e-05	0.0012	Cassette Exon	0.23	T
TC0600001347.mm.1	2.67	T	Il17ra	interleukin 17 receptor A; Synthetic construct Mus musculus clone IMAGE:100062151, MGC:190384 interleukin 17 receptor A (Il17ra) mRNA, encodes complete protein.	Coding	8.93	0.0006	0.0138	Cassette Exon	0.23	T
TC0700004565.mm.1	1.61	T	Ctsd; Ifitm10	cathepsin D; interferon induced transmembrane protein 10	Multiple_Complex	8.93	2.86e-05	0.0015			T
TC1300001560.mm.1	-18.96	T	Hist1h1b	histone cluster 1, H1b; Synthetic construct Mus musculus clone IMAGE:100015049, MGC:180350 histone cluster 1, H1b (Hist1h1b) mRNA, encodes complete protein.	Coding	8.91	3.72e-07	5.8e-05	Alternative 3' Acceptor Site	0.23	T
TC0X00002700.mm.1	-1.02	T	Gm14809; RP23-414J22.2	predicted gene 14809 [Source:MGI Symbol;Acc:MGI:3705177]; novel transcript	NonCoding	8.91	0.0026	0.0407			T
TC1100002127.mm.1	1.17	T	Emid1	EMI domain containing 1	Multiple_Complex	8.91	5.58e-06	0.0004	Cassette Exon	0.27	T
TC0200004580.mm.1	-2.19	T	Anapc1	anaphase promoting complex subunit 1	Multiple_Complex	8.89	0.0021	0.0353	Alternative 5' Donor Site	0.27	T
TC0500000096.mm.1	3.16	T	Pclo	piccolo (presynaptic cytomatrix protein); piccolo (presynaptic cytomatrix protein) (Pclo), transcript variant 2, mRNA.	Multiple_Complex	8.89	0.0005	0.0118			T
TC1600000484.mm.1	-1.06	T	Ropn1	ropporin, rhophilin associated protein 1	Coding	8.89	0.0005	0.0125			T
TC0600003415.mm.1	1.09	T	Casc1	cancer susceptibility candidate 1	Multiple_Complex	8.89	0.0003	0.0082			T
TC1600001590.mm.1	-2.71	T	Stxbp5l	syntaxin binding protein 5-like	Multiple_Complex	8.88	0.0019	0.0317			T
TC0700000989.mm.1	-6.95	T	Snrpa1	small nuclear ribonucleoprotein polypeptide A; small nuclear ribonucleoprotein polypeptide A'	Multiple_Complex	8.87	6.03e-05	0.0025	Alternative 3' Acceptor Site	0.23	T
TC1500001534.mm.1	-10.19	T	Dscc1	defective in sister chromatid cohesion 1 homolog (S. cerevisiae)	Multiple_Complex	8.87	9.75e-08	2.25e-05			T
TC0200000420.mm.1	-1.32	T	Fbxw5	F-box and WD-40 domain protein 5	Multiple_Complex	8.86	8.85e-05	0.0034	Alternative 3' Acceptor Site	0.35	T
TC1600000866.mm.1	1.61	T	Mir99ahg	Mir99a and Mirlet7c-1 host gene (non-protein coding)	NonCoding	8.86	0.0029	0.0438			T
TC0600000294.mm.1	1.54	T	Mkln1	muskelin 1, intracellular mediator containing kelch motifs	Multiple_Complex	8.86	0.0016	0.0287	Cassette Exon	0.25	T
TC1000002041.mm.1	-5.91	T	Rpf2	ribosome production factor 2 homolog (S. cerevisiae)	Multiple_Complex	8.86	0.0002	0.0071			T
TC1300002617.mm.1	-4.89	T	Ipo11	importin 11	Coding	8.86	0.0005	0.0117	Cassette Exon	0.26	T
TC1000000574.mm.1	2.33	T	Aifm2	apoptosis-inducing factor, mitochondrion-associated 2	Multiple_Complex	8.86	0.0015	0.0274	Alternative 5' Donor Site	0.21	T
TC0400003629.mm.1	-2.94	T	Serinc2	serine incorporator 2	Coding	8.85	1.14e-05	0.0007			T
TC0300002636.mm.1	-1.44	T	Magi3	membrane associated guanylate kinase, WW and PDZ domain containing 3	Multiple_Complex	8.85	0.0004	0.0108	Alternative 5' Donor Site	0.45	T
TC1600000222.mm.1	2.6	T	Ccdc74a	coiled-coil domain containing 74A	Multiple_Complex	8.84	0.0016	0.0282	Alternative 5' Donor Site	0.21	T
TC0400000011.mm.1	-3.02	T	Tgs1	trimethylguanosine synthase homolog (S. cerevisiae)	Multiple_Complex	8.83	0.0002	0.0057	Alternative 3' Acceptor Site	0.28	T
TC0900001254.mm.1	3	T	Dzip1l	DAZ interacting protein 1-like	Multiple_Complex	8.83	0.0005	0.0129			T
TC1500001227.mm.1	1.35	T	Pdzd2	PDZ domain containing 2	Multiple_Complex	8.83	9.44e-06	0.0006			T
TC0700001837.mm.1	-1.03	T	Mylpf	myosin light chain, phosphorylatable, fast skeletal muscle	Multiple_Complex	8.81	3.08e-05	0.0015	Alternative 5' Donor Site	0.27	T
TC1100004126.mm.1	-3.43	T	Mxra7	matrix-remodelling associated 7	Multiple_Complex	8.81	1.88e-05	0.0011			T
TC1300000263.mm.1	-1.04	T	Trim38	tripartite motif-containing 38; tripartite motif-containing 38 (Trim38), mRNA.	Multiple_Complex	8.8	0.0002	0.0052			T
TC1100000310.mm.1	1.22	T			NonCoding	8.8	4.02e-05	0.0019	Alternative 5' Donor Site	0.27	T
TC0900002038.mm.1	-1.4	T	Ei24	etoposide induced 2.4 mRNA; Synthetic construct Mus musculus clone IMAGE:100014979, MGC:180328 etoposide induced 2.4 mRNA (Ei24) mRNA, encodes complete protein.	Multiple_Complex	8.8	0.0016	0.0287	Intron Retention	0.54	T
TC1700000921.mm.1	-2.74	T	Med20; Usp49	mediator complex subunit 20; ubiquitin specific peptidase 49	Multiple_Complex	8.79	0.0004	0.0098			T
TC1100002096.mm.1	-1.28	T	Tug1	taurine upregulated gene 1; taurine upregulated gene 1 (Tug1), transcript variant b, non-coding RNA.	Multiple_Complex	8.78	0.0009	0.0186	Alternative 3' Acceptor Site	0.27	T
TC0200002321.mm.1	-5.94	T	Mapre1	microtubule-associated protein, RP/EB family, member 1	Multiple_Complex	8.78	5.87e-08	1.57e-05	Cassette Exon	0.29	T
TC0300000277.mm.1	1.56	T	Gm12532; RP23-243E17.5	predicted gene 12532 [Source:MGI Symbol;Acc:MGI:3650618]; novel transcript (C030047M16RIK)	NonCoding	8.77	3.99e-05	0.0019			T
TC1800000590.mm.1	-9.11	T	Isoc1	isochorismatase domain containing 1	Multiple_Complex	8.77	2.84e-05	0.0015	Cassette Exon	0.24	T
TC0400004166.mm.1	-1.05	T	Ttll10	tubulin tyrosine ligase-like family, member 10; Synthetic construct Mus musculus clone IMAGE:100068144, MGC:195761 tubulin tyrosine ligase-like family, member 10 (Ttll10) mRNA, encodes complete protein.	Multiple_Complex	8.76	0.0026	0.04			T
TC1100003121.mm.1	1.87	T	Derl2	Der1-like domain family, member 2	Multiple_Complex	8.76	0.0031	0.0454			T
TC0200002961.mm.1	2.97	T	Pfkfb3	6-phosphofructo-2-kinase/fructose-2,6-biphosphatase 3	Multiple_Complex	8.75	0.0032	0.0472	Cassette Exon	0.26	T
TC1200000895.mm.1	1.08	T	Adck1	aarF domain containing kinase 1; aarF domain containing kinase 1 (Adck1), mRNA.	Multiple_Complex	8.75	7.74e-05	0.0031			T
TC0700004148.mm.1	-3.1	T	Sox6	SRY (sex determining region Y)-box 6; SRY-box containing gene 6; SRY-box containing gene 6 (Sox6), transcript variant 2, mRNA.	Coding	8.75	5.58e-05	0.0024	Cassette Exon	0.2	T
TC0500002818.mm.1	-7.53	T	Rasgef1b	RasGEF domain family, member 1B	Multiple_Complex	8.74	6.82e-07	9e-05	Alternative 3' Acceptor Site	0.25	T
TC1200001041.mm.1	-1.03	T	Serpina3i	serine (or cysteine) peptidase inhibitor, clade A, member 3I	Multiple_Complex	8.74	2.89e-06	0.0003			T
TC0100001252.mm.1	2.13	T	Csrp1	cysteine and glycine-rich protein 1	Coding	8.73	0.0012	0.023			T
TC0100001711.mm.1	-9.11	T	Parp1; Mir6904	poly (ADP-ribose) polymerase family, member 1; microRNA 6904	Multiple_Complex	8.73	1.93e-06	0.0002			T
TC1900000954.mm.1	-4.49	T	Pacs1	phosphofurin acidic cluster sorting protein 1	Coding	8.72	0.0002	0.0064	Alternative 5' Donor Site	0.34	T
TC0400002854.mm.1	-2.67	T	Tle1	transducin-like enhancer of split 1, homolog of Drosophila E(spl); transducin-like enhancer of split 1, homolog of Drosophila E(spl) (Tle1), mRNA.	Multiple_Complex	8.72	0.0011	0.0219	Alternative 3' Acceptor Site	0.28	T
TC0400002733.mm.1	1.43	T	Svep1	sushi, von Willebrand factor type A, EGF and pentraxin domain containing 1	Multiple_Complex	8.71	0.0009	0.0192			T
TC1700002110.mm.1	-7.29	T	Cenpq	centromere protein Q	Multiple_Complex	8.71	7.45e-07	9.62e-05			T
TC0700000658.mm.1	3.26	T	Rhpn2	rhophilin, Rho GTPase binding protein 2	Multiple_Complex	8.7	0.0002	0.0051	Cassette Exon	0.25	T
TC1800001586.mm.1	-8.52	T	Ska1	spindle and kinetochore associated complex subunit 1; spindle and kinetochore associated complex subunit 1 (Ska1), transcript variant 2, mRNA.	Multiple_Complex	8.7	2.97e-05	0.0015	Alternative 3' Acceptor Site	0.21	T
TC1700000896.mm.1	-15.19	T	Dnph1	2-deoxynucleoside 5-phosphate N-hydrolase 1; 2'-deoxynucleoside 5'-phosphate N-hydrolase 1	Coding	8.69	2.77e-06	0.0003			T
TC0600003539.mm.1	-4.75	T	D630045J12Rik	RIKEN cDNA D630045J12 gene	Multiple_Complex	8.69	0.0002	0.006	Alternative 3' Acceptor Site	0.25	T
TC0500002420.mm.1	-7.37	T	Sel1l3	sel-1 suppressor of lin-12-like 3 (C. elegans)	Multiple_Complex	8.69	9.29e-06	0.0006			T
TC0600003489.mm.1	-4.77	T	Glcci1	glucocorticoid induced transcript 1	Multiple_Complex	8.68	0.0003	0.0085			T
TC1400001423.mm.1	-6.2	T			NonCoding	8.68	1.06e-07	2.38e-05			T
TC1800001539.mm.1	-2.15	T	4930503L19Rik	RIKEN cDNA 4930503L19 gene	Coding	8.67	0.0019	0.0319			T
TC0900001683.mm.1	1.02	T	4930433N12Rik	RIKEN cDNA 4930433N12 gene	Multiple_Complex	8.67	3.94e-06	0.0003			T
TC1500000901.mm.1	7.83	T	Cntn1	contactin 1	Multiple_Complex	8.66	0.0018	0.0307			T
TC1500002352.mm.1	2.35	T	Olfr288	olfactory receptor 288	Multiple_Complex	8.66	3.05e-08	9.65e-06			T
TC0X00002721.mm.1	1.52	T	Zmym3	zinc finger, MYM-type 3	Multiple_Complex	8.66	0.0002	0.0065	Alternative 3' Acceptor Site	0.21	T
TC0400000587.mm.1	1.46	T	Fktn	fukutin	Multiple_Complex	8.66	0.003	0.0451	Alternative 3' Acceptor Site	0.26	T
TC0100003124.mm.1	1	T	Rnpep	arginyl aminopeptidase (aminopeptidase B)	Multiple_Complex	8.66	3.94e-05	0.0019			T
[truncated: 8,068 more rows]

## Sheet: qNSCvsaNSC G.Profiler
source	term_name	term_id	adjusted_p_value	negative_log10_of_adjusted_p_value	term_size	query_size	intersection_size	effective_domain_size	intersections
GO:CC	cytoplasm	GO:0005737	5.79584e-210	209.237	11347	2936	2010	27279	AEBP1,NIT1,RELT,SMTNL2,SUCLG1,NUDT9,TKT,CCSER2,CLEC16A,FRMD4B,ASAP3,HERC2,MIEF2,CLCN5,SIRT3,SNAP47,DGKZ,FAM20C,WDR45,RNF31,CORO1B,MMAB,ZMYND8,KIF9,HIBADH,DCTN1,SVEP1,SPATA17,CLIP3,ACOT6,ANKS1B,ARHGAP17,REST,CTTNBP2,TRIP4,EXTL1,EXOC3L4,P3H1,SLC25A45,CACNA1A,TIMM44,RAB7,MITD1,CHST12,ARHGAP24,ZFYVE26,PACSIN1,PDE4A,SERPINB1C,NOS1,SNX21,BCL2L2,CCDC13,FKTN,CHD9,SLC39A14,ERRFI1,POMGNT2,MICAL3,MXRA8,FHL1…
GO:CC	endomembrane system	GO:0012505	5.09674e-142	141.293	4124	2936	961	27279	NUDT9,TKT,CLEC16A,CLCN5,SNAP47,FAM20C,ZMYND8,DCTN1,CLIP3,CTTNBP2,EXTL1,P3H1,RAB7,MITD1,CHST12,PACSIN1,NOS1,SNX21,FKTN,SLC39A14,POMGNT2,RNF5,KCNK2,DOLPP1,SERPINB9,ST6GALNAC6,INPP5K,ATP6V0D1,ANXA5,4933434E20RIK,MIB2,GPR107,TXNDC11,AGPAT1,STXBP2,B3GAT3,TMEM38B,KIF16B,AU040320,DNM1,WDR81,PIGP,NPC2,COG3,MON1A,KCNJ2,PEX16,COG7,TMX3,XXYLT1,FNDC5,PSEN1,PNPLA6,PACSIN3,JPH4,SIL1,TMED5,CCDC88A,ORMDL2,P2RX6,…
GO:CC	membrane	GO:0016020	7.15088e-136	135.146	10178	2936	1727	27279	RELT,SUCLG1,SLC22A15,NUDT9,TM2D1,PKD2L2,TKT,SLC45A3,CLEC16A,HERC2,MIEF2,CLCN5,SIRT3,SNAP47,DGKZ,WDR45,RNF31,SLC4A3,CORO1B,TMEM51,DCTN1,SVEP1,DEFB15,CLIP3,TMEM260,CACNA1H,ARHGAP17,EXTL1,P3H1,XKRX,SLC25A45,CACNA1A,TIMM44,SPRYD7,RAB7,TMEM82,MITD1,CHST12,PACSIN1,PDE4A,NOS1,SNX21,BCL2L2,FKTN,SLC39A14,ERRFI1,POMGNT2,MICAL3,DAGLB,MXRA8,FHL1,RNF5,SLC25A46,FRMD6,IL1RAPL1,KCNK2,DOLPP1,RILPL1,ST6GALNAC6,INP…
GO:BP	localization	GO:0051179	3.84601e-129	128.415	6255	2925	1224	27492	SLC22A15,PKD2L2,PLA2G5,SLC45A3,CLEC16A,FBLN5,ASAP3,MIEF2,CLCN5,SNAP47,WDR45,SLC4A3,CORO1B,ZMYND8,KIF9,DCTN1,SVEP1,CLIP3,ANKS1B,CACNA1H,ARHGAP17,REST,TRIP4,EXOC3L4,P3H1,SLC25A45,CACNA1A,TIMM44,RAB7,ARHGAP24,PACSIN1,NOS1,SNX21,BCL2L2,FKTN,SLC39A14,POMGNT2,MICAL3,FHL1,SLC25A46,FRMD6,IL1RAPL1,KCNK2,RILPL1,INPP5K,SLC25A16,ATP6V0D1,SLC41A3,AP5Z1,MYCBP2,ANXA5,4933434E20RIK,GPR107,CX3CL1,MUSK,SORBS2,ANGP…
GO:CC	organelle membrane	GO:0031090	7.77954e-116	115.109	3123	2936	757	27279	SUCLG1,NUDT9,TKT,CLEC16A,HERC2,MIEF2,CLCN5,SIRT3,SNAP47,CLIP3,EXTL1,SLC25A45,TIMM44,RAB7,MITD1,CHST12,PACSIN1,NOS1,SNX21,BCL2L2,FKTN,SLC39A14,POMGNT2,MXRA8,RNF5,SLC25A46,DOLPP1,ST6GALNAC6,SLC25A16,ATP6V0D1,TXNDC11,STXBP2,B3GAT3,ALPL,TMEM38B,CHCHD10,CAMKV,KIF16B,TFEB,AU040320,WDR81,SH3KBP1,PIGP,FDXR,PEX16,PEX1,COG7,TMX3,XXYLT1,FNDC5,PSEN1,PNPLA6,JPH4,CNR1,TMED5,ORMDL2,P2RX6,SNX24,ERP44,CTSD,STT3B,…
GO:BP	transport	GO:0006810	4.13618e-85	84.3834	4594	2925	898	27492	SLC22A15,PKD2L2,PLA2G5,SLC45A3,CLEC16A,FBLN5,MIEF2,CLCN5,SNAP47,SLC4A3,DCTN1,CLIP3,CACNA1H,ARHGAP17,REST,TRIP4,EXOC3L4,P3H1,SLC25A45,CACNA1A,TIMM44,RAB7,PACSIN1,NOS1,SNX21,BCL2L2,SLC39A14,MICAL3,FHL1,SLC25A46,IL1RAPL1,KCNK2,RILPL1,INPP5K,SLC25A16,ATP6V0D1,SLC41A3,AP5Z1,ANXA5,4933434E20RIK,GPR107,CX3CL1,ANGPT1,RHOBTB2,BACH2,SRCIN1,STXBP2,B3GAT3,TMEM38B,MKLN1,CHCHD10,CACNG8,KIF16B,AU040320,DNM1,WDR…
GO:BP	establishment of localization	GO:0051234	3.04193e-83	82.5169	4747	2925	914	27492	SLC22A15,PKD2L2,PLA2G5,SLC45A3,CLEC16A,FBLN5,MIEF2,CLCN5,SNAP47,SLC4A3,DCTN1,CLIP3,CACNA1H,ARHGAP17,REST,TRIP4,EXOC3L4,P3H1,SLC25A45,CACNA1A,TIMM44,RAB7,PACSIN1,NOS1,SNX21,BCL2L2,SLC39A14,MICAL3,FHL1,SLC25A46,IL1RAPL1,KCNK2,RILPL1,INPP5K,SLC25A16,ATP6V0D1,SLC41A3,AP5Z1,ANXA5,4933434E20RIK,GPR107,CX3CL1,ANGPT1,RHOBTB2,BACH2,SRCIN1,STXBP2,B3GAT3,TMEM38B,MKLN1,CHCHD10,CACNG8,KIF16B,AU040320,DNM1,WDR…
GO:MF	protein binding	GO:0005515	3.32376e-82	81.4784	10433	2850	1658	25399	AEBP1,ANKRD35,RELT,SMTNL2,TKT,CCSER2,CLEC16A,FBLN5,FRMD4B,ASAP3,HERC2,MIEF2,CLCN5,SIRT3,SNAP47,DGKZ,WDR45,RNF31,SLC4A3,CORO1B,ZMYND8,KIF9,DCTN1,SVEP1,DEFB15,SPATA17,CLIP3,ANKS1B,CACNA1H,ARHGAP17,REST,CTTNBP2,TRIP4,P3H1,CACNA1A,TIMM44,SPRYD7,RAB7,MITD1,SFRP5,PACSIN1,SERPINB1C,NOS1,SNX21,BCL2L2,CHD9,ERRFI1,POMGNT2,MICAL3,FHL1,RNF5,FRMD6,KCNK2,RILPL1,HECTD3,FOXJ2,SERPINB9,INPP5K,ATP6V0D1,MYCBP2,PRPS…
GO:CC	cell junction	GO:0030054	3.13095e-76	75.5043	2107	2936	516	27279	NUDT9,FRMD4B,ASAP3,CLCN5,SNAP47,DGKZ,ZMYND8,ARHGAP17,CTTNBP2,TRIP4,CACNA1A,RAB7,ARHGAP24,PACSIN1,PDE4A,NOS1,DAGLB,MXRA8,FRMD6,IL1RAPL1,KCNK2,ATP6V0D1,ANXA5,CX3CL1,MUSK,SORBS2,SRCIN1,STXBP2,FLII,MKLN1,CAMKV,DNM1,SH3KBP1,GIT2,KCNJ2,CAMK1,PSEN1,0610040J01RIK,CNR1,P2RX6,SCHIP1,E030003E18RIK,SLC6A8,FYN,GABRR2,SYNGAP1,GSG1L,GIT1,CLCN4,LDB3,ABCA7,CD99L2,NTRK2,SNAP23,CLTC,ATP1B1,4932438A13RIK,ATAD1,AMOT,…
GO:CC	endoplasmic reticulum	GO:0005783	3.81474e-74	73.4185	1815	2936	464	27279	TKT,EXTL1,P3H1,NOS1,FKTN,POMGNT2,RNF5,KCNK2,DOLPP1,INPP5K,ANXA5,TXNDC11,AGPAT1,TMEM38B,PIGP,NPC2,KCNJ2,PEX16,TMX3,XXYLT1,FNDC5,PSEN1,PNPLA6,JPH4,SIL1,TMED5,CCDC88A,ORMDL2,ERP44,P4HA2,THY1,STT3B,TAPBP,PITPNM1,SRD5A1,H2-K1,ATG2A,FYN,NUCB1,TMEM259,PIGK,CRAT,EDEM2,DHCR7,UGT1A2,FMN2,TMEM109,CLCN4,NTRK2,AGTRAP,MPPE1,FAAH,SCAP,ZFYVE27,RNF43,SGPP1,LPGAT1,CDIPT,STX18,SURF4,SERPINH1,ERAP1,ATP11B,ASL,RHBDD1…
GO:BP	lipid metabolic process	GO:0006629	9.58342e-74	73.0185	1371	2925	386	27492	PLA2G5,SLC45A3,SIRT3,DGKZ,ACOT6,CACNA1H,REST,RAB7,DAGLB,DOLPP1,ST6GALNAC6,INPP5K,PNPLA3,ALK,AGPAT1,NUDT7,ACAD12,TMEM38B,PPARD,PDK1,LIPE,PIGP,NPC2,FDXR,SCTR,PNPLA6,STAT5A,CNR1,ORMDL2,SCHIP1,E030003E18RIK,CHKB,SRD5A1,PIGK,CRAT,ASXL3,DHCR7,ABCA7,PEX2,HMGCS1,MPPE1,BCO2,ACAT2,FAAH,DCTN6,SCAP,4932438A13RIK,STAT5B,HMGCL,ACAD11,LDLRAP1,DGKI,SGPP1,LPGAT1,DGKQ,CDIPT,CERK,ACP6,PISD,GDE1,INPP5B,PRKAA1,ACAA1B…
GO:MF	catalytic activity	GO:0003824	1.01364e-69	68.9941	5699	2850	1036	25399	AEBP1,NIT1,SUCLG1,NUDT9,TKT,PLA2G5,HERC2,UBE2E2,SIRT3,DGKZ,FAM20C,CAR10,RNF31,MMAB,KIF9,HIBADH,ACOT6,EXTL1,P3H1,FUOM,RAB7,UAP1L1,CHST12,AMDHD2,PDE4A,NOS1,FKTN,CHD9,POMGNT2,MICAL3,DAGLB,RNF5,IL1RAPL1,DOLPP1,HECTD3,ST6GALNAC6,INPP5K,PFKFB4,PMM2,MYCBP2,PRPSAP1,PNPLA3,CYP2J7,MIB2,MTHFS,PPIP5K1,HAGH,MUSK,ALK,AGPAT1,RNF181,SLK,RHOBTB2,NUDT7,ACAD12,B3GAT3,POLD4,ALPL,ACO2,GFOD1,CAMKV,KIF16B,OTUD7A,DNM1,G…
GO:BP	regulation of localization	GO:0032879	1.93184e-68	67.714	2852	2925	611	27492	MIEF2,CORO1B,ZMYND8,KIF9,DCTN1,CLIP3,REST,P3H1,CACNA1A,RAB7,PACSIN1,NOS1,FHL1,IL1RAPL1,INPP5K,MYCBP2,ANXA5,CX3CL1,MUSK,SORBS2,ANGPT1,SLK,SRCIN1,STXBP2,B3GAT3,TMEM38B,MKLN1,CHCHD10,CACNG8,DNM1,PPARD,GIT2,KCNJ2,CAMK1,KCNK13,PSEN1,STAT5A,PACSIN3,JPH4,CNR1,WIPF1,CCDC88A,YAP1,MALAT1,CTSD,DNAJC27,THY1,LATS2,FYN,CACNA2D4,NUCB1,BICD1,GSG1L,GIT1,EDEM2,RHOT1,TACR1,IL15,TMEM109,ABCA7,SPRED1,CD99L2,NTRK2,SNA…
GO:CC	bounding membrane of organelle	GO:0098588	1.11423e-67	66.953	1658	2936	425	27279	CLEC16A,MIEF2,CLCN5,SNAP47,CLIP3,RAB7,MITD1,CHST12,NOS1,SNX21,BCL2L2,FKTN,SLC39A14,MXRA8,SLC25A46,ST6GALNAC6,ATP6V0D1,STXBP2,B3GAT3,KIF16B,TFEB,AU040320,WDR81,PEX16,PEX1,COG7,FNDC5,PSEN1,CNR1,TMED5,CTSD,TAPBP,CYB561A3,H2-K1,CHMP7,NUCB1,ZFYVE16,MVB12B,RHOT1,DHCR7,TMEM109,CLCN4,ABCA7,NTRK2,PEX2,AGTRAP,WHAMM,RFFL,CLTC,MPPE1,SLC25A4,FAAH,SCAP,ATAD1,MYO18A,ZFYVE27,RHOT2,SNX1,NAPB,DGKI,SLC11A2,INSR,VPS…
GO:CC	cellular anatomical entity	GO:0110165	1.08489e-66	65.9646	22667	2936	2745	27279	AEBP1,NIT1,RELT,SMTNL2,SUCLG1,SLC22A15,NUDT9,TM2D1,PKD2L2,TKT,PLA2G5,SLC45A3,CCSER2,CLEC16A,FBLN5,FRMD4B,ASAP3,HERC2,MIEF2,UBE2E2,CLCN5,SIRT3,SNAP47,DGKZ,FAM20C,WDR45,RNF31,SLC4A3,CORO1B,TMEM51,MMAB,ZMYND8,KIF9,HIBADH,DCTN1,SVEP1,DEFB15,SPATA17,CLIP3,ACOT6,TMEM260,ANKS1B,CACNA1H,ARHGAP17,REST,CTTNBP2,TRIP4,EXTL1,EXOC3L4,P3H1,XKRX,SLC25A45,CACNA1A,TIMM44,SPRYD7,RAB7,TMEM82,MITD1,CHST12,ARHGAP24,SF…
GO:CC	synapse	GO:0045202	5.47898e-66	65.2613	1494	2936	394	27279	CLCN5,SNAP47,DGKZ,ZMYND8,CTTNBP2,TRIP4,CACNA1A,RAB7,PACSIN1,PDE4A,NOS1,DAGLB,IL1RAPL1,KCNK2,ATP6V0D1,ANXA5,CX3CL1,MUSK,SORBS2,SRCIN1,STXBP2,MKLN1,CAMKV,DNM1,SH3KBP1,GIT2,KCNJ2,CAMK1,PSEN1,CNR1,P2RX6,E030003E18RIK,SLC6A8,FYN,GABRR2,SYNGAP1,GSG1L,GIT1,CLCN4,NTRK2,SNAP23,CLTC,4932438A13RIK,ATAD1,GRIK1,NAPB,SLC2A8,DGKI,INSR,VPS35,DGKQ,NAPG,SAMD4,SLC4A8,TANC2,GABRA2,TSC1,AAK1,PTK2,ATP6V0C,QK,TPD52,SRI…
GO:BP	macromolecule localization	GO:0033036	6.53307e-66	65.1849	2962	2925	621	27492	PLA2G5,FBLN5,MIEF2,SNAP47,WDR45,CORO1B,ZMYND8,DCTN1,CLIP3,REST,P3H1,CACNA1A,TIMM44,RAB7,PACSIN1,NOS1,SNX21,FRMD6,RILPL1,INPP5K,AP5Z1,MYCBP2,ANXA5,MUSK,SORBS2,ANGPT1,SRCIN1,STXBP2,B3GAT3,CHCHD10,PPARD,NPC2,COG3,MON1A,PEX16,PEX1,COG7,CAMK1,PSEN1,STAT5A,AKAP11,PCTP,SIL1,CNR1,WIPF1,TMED5,CCDC88A,SLCO1B2,SNX24,YAP1,VIPAS39,CTSD,DNAJC27,THY1,LATS2,PITPNM1,CHMP7,ATG2A,WBP2,FYN,ZBTB16,CEP350,NCOA4,NUCB1,…
GO:BP	nervous system development	GO:0007399	1.47261e-65	64.8319	2468	2925	547	27492	SLC45A3,ZMYND8,DCTN1,REST,CTTNBP2,P3H1,FUOM,CACNA1A,PACSIN1,NOS1,BCL2L2,FKTN,POMGNT2,DAGLB,MXRA8,SLC25A46,ELAVL3,IL1RAPL1,ATP6V0D1,MYCBP2,CX3CL1,S1PR5,MUSK,ALK,ZFP365,SRCIN1,MIR138-2,AU040320,PPARD,NKX2-2OS,CAMK1,PSEN1,SCTR,LRTM2,CNR1,CCDC88A,YAP1,DNMT3A,NAV2,THY1,SRD5A1,H2-K1,FYN,ZBTB16,SYNGAP1,ULK2,GIT1,NTRK2,ZFYVE27,SMARCD3,DTX1,ZFP521,SLC11A2,RGS4,SCN1B,VPS35,ETV4,PLXNA4,TANC2,CLIP1,EYA1,DPYS…
GO:BP	regulation of biological quality	GO:0065008	1.9048e-64	63.7202	3977	2925	760	27492	SMTNL2,SNAP47,SLC4A3,ZMYND8,DCTN1,CACNA1H,REST,CTTNBP2,P3H1,CACNA1A,RAB7,PACSIN1,NOS1,BCL2L2,SLC39A14,DAGLB,FHL1,RNF5,IL1RAPL1,KCNK2,INPP5K,ATP6V0D1,ANXA5,CX3CL1,MUSK,ALK,ANGPT1,RHOBTB2,SRCIN1,MIR138-2,STXBP2,ALPL,FLII,TMEM38B,MKLN1,CHCHD10,CAMKV,WDR81,PPARD,SH3KBP1,LIPE,NPC2,GIT2,COG3,KCNJ2,COG7,CAMK1,KCNK13,RNF135,PSEN1,SCTR,STAT5A,AKAP11,LRTM2,JPH4,CNR1,ORMDL2,P2RX6,SCHIP1,YAP1,NAV2,E030003E18…
GO:BP	anatomical structure development	GO:0048856	2.95155e-64	63.53	6113	2925	1038	27492	RELT,SLC45A3,FBLN5,MIEF2,FAM20C,CORO1B,ZMYND8,DCTN1,SVEP1,REST,CTTNBP2,TRIP4,P3H1,FUOM,CACNA1A,ARHGAP24,SFRP5,PACSIN1,NOS1,BCL2L2,FKTN,SLC39A14,ERRFI1,POMGNT2,DAGLB,MXRA8,FHL1,SLC25A46,ELAVL3,FRMD6,IL1RAPL1,KCNK2,RILPL1,FOXJ2,INPP5K,ATP6V0D1,MYCBP2,4933434E20RIK,ZFP608,CX3CL1,S1PR5,MUSK,ALK,SORBS2,ANGPT1,RHPN1,RHOBTB2,ZMYM3,ZFP365,SRCIN1,ZFP281,MIR138-2,TCF7L1,ALPL,FLII,TMEM38B,MKLN1,TRPC4AP,ACO2…
GO:CC	intracellular anatomical structure	GO:0005622	5.59848e-64	63.2519	17282	2936	2271	27279	AEBP1,NIT1,RELT,SMTNL2,SUCLG1,NUDT9,TKT,CCSER2,CLEC16A,FRMD4B,ASAP3,HERC2,MIEF2,UBE2E2,CLCN5,SIRT3,SNAP47,DGKZ,FAM20C,WDR45,RNF31,CORO1B,MMAB,ZMYND8,KIF9,HIBADH,DCTN1,SVEP1,DEFB15,SPATA17,CLIP3,ACOT6,ANKS1B,ARHGAP17,REST,CTTNBP2,TRIP4,EXTL1,EXOC3L4,P3H1,SLC25A45,CACNA1A,TIMM44,RAB7,MITD1,CHST12,ARHGAP24,ZFYVE26,PACSIN1,PDE4A,ZFP235,SERPINB1C,NOS1,SNX21,ZCCHC18,BCL2L2,CCDC13,FKTN,CHD9,SLC39A14,ERR…
GO:BP	multicellular organism development	GO:0007275	2.67251e-63	62.5731	5441	2925	950	27492	RELT,SLC45A3,FBLN5,FAM20C,ZMYND8,DCTN1,SVEP1,REST,CTTNBP2,P3H1,FUOM,CACNA1A,ARHGAP24,SFRP5,PACSIN1,NOS1,BCL2L2,FKTN,SLC39A14,ERRFI1,POMGNT2,DAGLB,MXRA8,FHL1,SLC25A46,ELAVL3,IL1RAPL1,KCNK2,FOXJ2,INPP5K,ATP6V0D1,MYCBP2,4933434E20RIK,ZFP608,CX3CL1,S1PR5,MUSK,ALK,SORBS2,ANGPT1,RHPN1,ZFP365,SRCIN1,ZFP281,MIR138-2,TCF7L1,ALPL,TMEM38B,TRPC4AP,ACO2,KIF16B,TFEB,AU040320,PPARD,NEK8,NKX2-2OS,CAMK1,TCTA,PSEN…
GO:MF	binding	GO:0005488	1.74775e-51	50.7575	16189	2850	2180	25399	AEBP1,ANKRD35,RELT,SMTNL2,SUCLG1,TM2D1,PKD2L2,TKT,PLA2G5,CCSER2,CLEC16A,FBLN5,FRMD4B,ASAP3,HERC2,MIEF2,UBE2E2,CLCN5,SIRT3,SNAP47,DGKZ,FAM20C,WDR45,CAR10,RNF31,SLC4A3,CORO1B,MMAB,ZMYND8,KIF9,HIBADH,DCTN1,SVEP1,DEFB15,SPATA17,CLIP3,ANKS1B,CACNA1H,ARHGAP17,REST,CTTNBP2,TRIP4,P3H1,FUOM,CACNA1A,TIMM44,SPRYD7,RAB7,MITD1,SFRP5,AMDHD2,ZFYVE26,PACSIN1,PDE4A,ZFP235,SERPINB1C,NOS1,SNX21,ZCCHC18,BCL2L2,CHD9,…
GO:MF	ion binding	GO:0043167	1.08868e-48	47.9631	5890	2850	994	25399	AEBP1,SUCLG1,PKD2L2,TKT,PLA2G5,FBLN5,ASAP3,HERC2,UBE2E2,CLCN5,SIRT3,DGKZ,FAM20C,WDR45,CAR10,RNF31,MMAB,ZMYND8,KIF9,SVEP1,REST,TRIP4,P3H1,CACNA1A,TIMM44,RAB7,AMDHD2,ZFYVE26,PDE4A,ZFP235,NOS1,SNX21,ZCCHC18,CHD9,MICAL3,DAGLB,FHL1,RNF5,EFCAB12,PFKFB4,PMM2,MYCBP2,PRPSAP1,ANXA5,PNPLA3,CYP2J7,ZFP608,MIB2,MTHFS,PPIP5K1,HAGH,MUSK,ALK,ZCCHC24,RNF181,SLK,RHOBTB2,ZMYM3,ZFP365,NUDT7,ZFP281,ZFP287,ACAD12,YPEL5…
KEGG	Metabolic pathways	KEGG:01100	2.47753e-36	35.606	1582	1286	409	8714	SUCLG1,NUDT9,TKT,PLA2G5,SIRT3,DGKZ,MMAB,HIBADH,EXTL1,UAP1L1,AMDHD2,PDE4A,NOS1,FKTN,POMGNT2,DOLPP1,ST6GALNAC6,INPP5K,PMM2,ATP6V0D1,PNPLA3,MTHFS,HAGH,AGPAT1,B3GAT3,ALPL,ACO2,GGCT,PIGP,PPT2,DNMT3A,CAR13,P4HA2,E030003E18RIK,STT3B,CHKB,SARDH,SRD5A1,HDDC3,PIGK,GMPR,DHCR7,UGT1A2,ALDH7A1,HMGCS1,MPPE1,ACAT2,HMGCL,SGPP1,DGKQ,CDIPT,CERK,PISD,ITPK1,ALDH1A7,ASL,INPP5B,FPGT,ATP6V0C,GALE,MAOA,MCEE,ACAA1B,ACYP2,…
GO:MF	transporter activity	GO:0005215	1.08494e-32	31.9646	1161	2850	276	25399	SLC22A15,PKD2L2,SLC45A3,CLCN5,SLC4A3,CACNA1H,SLC25A45,CACNA1A,SLC39A14,KCNK2,ATP6V0D1,SLC41A3,ANXA5,TMEM38B,CACNG8,NPC2,KCNJ2,KCNK13,PSEN1,PCTP,CNR1,SLCO1B2,P2RX6,SLC6A8,CYB561A3,PITPNM1,ATG2A,CACNA2D4,GABRR2,TMEM109,CLCN4,SLC25A21,ABCA7,SLC25A4,MFSD9,ATP1B1,ATAD1,GRIK1,SLC31A2,SLC2A8,SLC11A2,SCN1B,SLC25A29,SLC4A8,GABRA2,GJB1,ATP11B,ATP6V0C,ABCB9,MMGT2,SEC61A2,ATP1A3,TMCO3,ATP7B,CACNB1,MFSD3,ABCD…
GO:MF	anion binding	GO:0043168	3.09015e-32	31.51	2432	2850	469	25399	SUCLG1,TKT,UBE2E2,CLCN5,SIRT3,DGKZ,FAM20C,WDR45,MMAB,KIF9,P3H1,TIMM44,RAB7,PDE4A,NOS1,SNX21,CHD9,MICAL3,PFKFB4,PNPLA3,MTHFS,PPIP5K1,MUSK,ALK,SLK,RHOBTB2,ACAD12,FLII,CAMKV,KIF16B,DNM1,PPARD,PDK1,NEK8,KCNJ2,FDXR,PEX1,CAMK1,STAT5A,P2RX6,KIF6,DNAJC27,P4HA2,SGK2,CHKB,LATS2,KIF1C,CLK1,SARDH,PITPNM1,SRD5A1,FYN,ZFYVE16,ULK2,RHOT1,UGT1A2,URGCP,CLCN4,ABCA7,NTRK2,DDX3Y,HMGCL,ATAD1,MYO18A,RHOT2,ACAD11,LDLRAP…
GO:MF	transferase activity	GO:0016740	4.4133e-29	28.3552	2287	2850	438	25399	TKT,HERC2,UBE2E2,SIRT3,DGKZ,FAM20C,RNF31,MMAB,EXTL1,UAP1L1,CHST12,FKTN,POMGNT2,RNF5,HECTD3,ST6GALNAC6,PFKFB4,MYCBP2,PRPSAP1,PNPLA3,MIB2,PPIP5K1,MUSK,ALK,AGPAT1,RNF181,SLK,B3GAT3,POLD4,CAMKV,PDK1,PIGP,GIT2,NEK8,CAMK1,SETD3,RNF135,XXYLT1,CBX4,OSGEPL1,PRDM5,RNF167,DNMT3A,STT3B,SGK2,CHKB,LATS2,CLK1,FYN,ULK2,CRAT,RING1,UGT1A2,NTRK2,HMGCS1,RFFL,ACAT2,RNF43,DTX1,DGKI,INSR,LPGAT1,WNK2,DGKQ,CDIPT,CERK,MAP…
GO:MF	small molecule binding	GO:0036094	4.95845e-29	28.3047	2561	2850	477	25399	SUCLG1,TKT,UBE2E2,CLCN5,SIRT3,DGKZ,FAM20C,MMAB,KIF9,HIBADH,P3H1,FUOM,TIMM44,RAB7,PDE4A,NOS1,CHD9,MICAL3,PFKFB4,PNPLA3,MTHFS,PPIP5K1,MUSK,ALK,SLK,RHOBTB2,ACAD12,GFOD1,CAMKV,KIF16B,DNM1,PPARD,PDK1,NPC2,NEK8,FDXR,PEX1,CAMK1,SIL1,P2RX6,ACBD4,KIF6,DNAJC27,P4HA2,E030003E18RIK,SGK2,CHKB,LATS2,KIF1C,CLK1,SARDH,SRD5A1,FYN,ULK2,RHOT1,DHCR7,UGT1A2,URGCP,CLCN4,ABCA7,NTRK2,HMGCS1,DDX3Y,SCAP,HMGCL,ATAD1,MYO18A…
GO:MF	transmembrane transporter activity	GO:0022857	1.0658e-27	26.9723	1070	2850	249	25399	SLC22A15,PKD2L2,SLC45A3,CLCN5,SLC4A3,CACNA1H,SLC25A45,CACNA1A,SLC39A14,KCNK2,ATP6V0D1,SLC41A3,ANXA5,TMEM38B,CACNG8,KCNJ2,KCNK13,PSEN1,CNR1,SLCO1B2,P2RX6,SLC6A8,CYB561A3,CACNA2D4,GABRR2,TMEM109,CLCN4,SLC25A21,ABCA7,SLC25A4,MFSD9,ATP1B1,GRIK1,SLC31A2,SLC2A8,SLC11A2,SCN1B,SLC25A29,SLC4A8,GABRA2,GJB1,ATP6V0C,ABCB9,MMGT2,SEC61A2,ATP1A3,TMCO3,ATP7B,CACNB1,MFSD3,ABCD1,MCU,ABCA6,SLC26A11,MPV17,ABCC4,TPCN…
GO:MF	enzyme binding	GO:0019899	1.44814e-26	25.8392	2254	2850	425	25399	SMTNL2,HERC2,WDR45,RNF31,SLC4A3,DCTN1,TRIP4,TIMM44,RAB7,NOS1,ERRFI1,MICAL3,RNF5,SERPINB9,MYCBP2,ANXA5,MUSK,ANGPT1,RHOBTB2,SRCIN1,TRPC4AP,KIF16B,TFEB,DNM1,SH3KBP1,LIPE,NPC2,PSEN1,AKAP11,CCDC88A,CBX4,THY1,PITPNM1,KCTD21,FYN,SYNGAP1,BICD1,GIT1,UGT1A2,CCNYL1,WWC1,LDB3,SPRED1,NTRK2,WHAMM,RFFL,CLTC,SLC25A4,ATP1B1,DTX1,DGKI,INSR,DGKQ,MAPKAPK3,MAP3K11,PDE4DIP,MICALL2,SFI1,PTK2,RAB29,ATP6V0C,BC029214,PRKA…
GO:MF	cation binding	GO:0043169	3.36988e-25	24.4724	4166	2850	680	25399	AEBP1,PKD2L2,TKT,PLA2G5,FBLN5,ASAP3,HERC2,SIRT3,DGKZ,FAM20C,CAR10,RNF31,ZMYND8,SVEP1,REST,TRIP4,P3H1,CACNA1A,AMDHD2,ZFYVE26,PDE4A,ZFP235,NOS1,ZCCHC18,MICAL3,DAGLB,FHL1,RNF5,EFCAB12,PMM2,MYCBP2,PRPSAP1,ANXA5,CYP2J7,ZFP608,MIB2,MTHFS,HAGH,MUSK,ZCCHC24,RNF181,ZMYM3,ZFP365,NUDT7,ZFP281,ZFP287,YPEL5,B3GAT3,ALPL,ACO2,TRAFD1,OTUD7A,PPARD,GIT2,NEK8,TYW5,RNF135,XXYLT1,CTDSP2,PCTP,GM14308,OSGEPL1,PRDM5,RNF…
REAC	Metabolism	REAC:R-MMU-1430728	2.09789e-22	21.6782	1682	1414	418	8748	SUCLG1,NUDT9,TKT,MMAB,HIBADH,ACOT6,CACNA1A,CHST12,CHD9,ST6GALNAC6,INPP5K,PFKFB4,SLC25A16,MTHFS,PPIP5K1,B3GAT3,ACO2,GGCT,PPARD,PDK1,FDXR,PNPLA6,PPT2,SLCO1B2,ORMDL2,ACBD4,CAR13,E030003E18RIK,SLC6A8,CHKB,SARDH,PITPNM1,CRAT,GMPR,DHCR7,UGT1A2,SLC25A21,ALDH7A1,HMGCS1,BCO2,ACAT2,FAAH,SCAP,HMGCL,SMARCD3,SGPP1,LPGAT1,CDIPT,CERK,ACP6,ITPK1,GDE1,ASL,INPP5B,GALE,MAOA,STARD10,MCEE,RUFY1,PHKB,ACAA1B,NT5E,NUDT1…
KEGG	Lysosome	KEGG:04142	2.40641e-19	18.6186	134	1286	66	8714	ATP6V0D1,NPC2,PPT2,CTSD,CLTC,SLC11A2,ATP6V0C,ABCB9,CLTB,NEU1,HYAL1,LAPTM4A,MANBA,MFSD8,CLN3,PLA2G15,ACP2,MAN2B1,HGSNAT,GNPTG,MCOLN1,AP3M1,FUCA2,SGSH,ARSB,GM2A,CD63,ATP6V0A2,M6PR,PPT1,HEXA,GNS,AGA,CTSL,ARSA,CTSA,TCIRG1,GNPTAB,ATP6AP1,LAMP2,SORT1,FUCA1,ATP6V0A1,NAGA,SCARB2,ASAH1,CTNS,LITAF,PSAP,GBA,IDS,CTSF,GAA,ATP6V0B,IDUA,LGMN,SMPD1,TPP1,CTSO,LAMP1,CTSB,ARSG,NPC1,LIPA,LAPTM4B,ABCA2
REAC	Metabolism of lipids	REAC:R-MMU-556833	1.29124e-17	16.889	569	1414	177	8748	ACOT6,CHD9,INPP5K,PPARD,FDXR,PNPLA6,PPT2,SLCO1B2,ORMDL2,ACBD4,CHKB,PITPNM1,CRAT,DHCR7,HMGCS1,ACAT2,FAAH,SCAP,HMGCL,SMARCD3,SGPP1,LPGAT1,CDIPT,CERK,ACP6,GDE1,STARD10,MCEE,RUFY1,ACAA1B,SCD2,SUMF2,HSD17B4,ABCD1,GPX4,CEPT1,HADHB,FDFT1,PTDSS2,FAR1,LCLAT1,PLEKHA8,DHRS7B,SLC44A2,FITM2,PIP4K2C,ACAA1A,NEU1,SRD5A3,LSS,FADS1,ACOT9,KDSR,PIK3R1,HADH,ACOX3,ECI1,OSBPL7,PPARA,ACACB,MBOAT1,BDH2,DEGS1,STARD3NL,CPT…
REAC	Transport of small molecules	REAC:R-MMU-382551	6.413e-11	10.1929	636	1414	173	8748	SLC22A15,SLC45A3,CLCN5,SLC4A3,SLC39A14,RNF5,ATP6V0D1,TRPC4AP,NPC2,SLCO1B2,SGK2,HEPH,CLCN4,ABCA7,CLTC,SLC25A4,ATP1B1,LDLRAP1,SLC2A8,SLC11A2,SLC25A29,SLC4A8,ATP11B,ATP6V0C,ABCB9,OS9,SRI,ATP1A3,ATP7B,DERL2,FBXL5,ABCD1,MCU,ABCA6,SLC26A11,ERLEC1,ABCC4,AHCYL2,TPCN2,ABCA3,BSG,SLC5A11,SLC44A2,HMOX2,GNB5,SLC3A2,LDLR,PSMB10,SLC22A17,ABCC5,FTH1,ABCB8,SAR1B,CLCN2,SLC27A4,SLC35A2,NIPAL3,WNK1,ATP2C1,SLC33A1,MI…
KEGG	Fatty acid metabolism	KEGG:01212	1.79549e-10	9.74582	62	1286	33	8714	PPT2,ACAT2,ACAA1B,SCD2,HSD17B4,HADHB,ACAA1A,ELOVL4,FADS1,HADH,ACOX3,CPT2,TECR,ACADM,ELOVL6,ACOX1,ACADL,PPT1,ACADVL,ACAA2,SCD3,FADS2,ACAT3,ELOVL5,ACSL1,HACD3,ELOVL1,HACD2,CPT1A,ACSBG1,SCD1,ACSL6,ELOVL7
KEGG	Glycerophospholipid metabolism	KEGG:00564	2.38117e-08	7.62321	97	1286	40	8714	PLA2G5,DGKZ,AGPAT1,PNPLA6,CHKB,LPGAT1,DGKQ,CDIPT,PISD,CEPT1,PTDSS2,LCLAT1,DGKA,PLPP4,MBOAT1,PLA2G15,PCYT1B,PTDSS1,ETNK1,GPD2,AGPAT3,CHPT1,PLD3,MBOAT2,PLPP2,PLD1,DGKB,PCYT2,PLA2G4A,PLPP1,AGPAT5,PNPLA7,CDS2,LPCAT3,PLPP3,GPAM,PLD2,AGPAT4,ETNPPL,LCAT
KEGG	Peroxisome	KEGG:04146	3.44073e-07	6.46335	85	1286	35	8714	NUDT7,PEX16,PEX1,CRAT,PEX2,HMGCL,ACAA1B,PEX11A,HSD17B4,ABCD1,MPV17,ECH1,ABCD4,PRDX1,FAR1,PXMP2,ACAA1A,ACOX3,HACL1,CAT,MPV17L2,ECI2,ACOX1,MPV17L,ABCD3,PHYH,ABCD2,PXMP4,GSTK1,DDO,ACSL1,CROT,ACSL6,EPHX2,PEX5L
KEGG	Biosynthesis of unsaturated fatty acids	KEGG:01040	3.79427e-06	5.42087	34	1286	19	8714	ACAA1B,SCD2,HSD17B4,ACAA1A,ELOVL4,FADS1,ACOX3,TECR,ELOVL6,ACOT7,ACOX1,SCD3,FADS2,ELOVL5,HACD3,ELOVL1,HACD2,SCD1,ELOVL7
REAC	Fatty acid metabolism	REAC:R-MMU-8978868	9.12101e-06	5.03996	167	1414	56	8748	ACOT6,PPARD,PPT2,ACBD4,CRAT,FAAH,MCEE,ACAA1B,SCD2,HSD17B4,ABCD1,GPX4,HADHB,ACAA1A,FADS1,ACOT9,HADH,ACOX3,ECI1,ACACB,CPT2,TECR,HACL1,ACADM,ELOVL6,MID1IP1,ECI2,ACOT7,ACOX1,PPT1,PHYH,ACADVL,ACAA2,CYP4F17,FADS2,PON2,PRKAA2,CYP2U1,ACSF2,ELOVL5,ACSL1,CROT,PLA2G4A,HACD3,ACOT11,ELOVL1,HACD2,CPT1A,ACSBG1,CYP2J6,ACSL6,EPHX2,CYP4F14,ELOVL7,PTGDS,CYP4F15
KEGG	Glutamatergic synapse	KEGG:04724	3.49726e-05	4.45627	112	1286	38	8714	CACNA1A,GRIK1,GNB5,PLCB4,ADRBK2,MAPK3,ITPR1,GRIK2,PRKACB,ADCY9,DLGAP1,PPP3CC,GRIA4,GRM7,ADCY8,GRIA1,GNG7,PLCB1,GNAO1,GNG8,PPP3CA,PLD1,ADCY5,GNG12,PLA2G4A,GNG11,PRKCA,GLUL,SLC1A3,GRIA2,ITPR2,SLC1A2,ADCY2,GNAI1,PLD2,SLC38A3,GRM3,GRIN2C
KEGG	Phospholipase D signaling pathway	KEGG:04072	3.8579e-05	4.41365	148	1286	46	8714	DGKZ,AGPAT1,DNM1,FYN,INSR,DGKQ,TSC1,MAP2K1,DGKA,KIT,PLCB4,MAPK3,GNA13,LPAR1,PIK3R1,PDGFC,ADCY9,SHC3,AGPAT3,GRM7,ADCY8,RRAS,DNM2,PLCB1,CYTH1,PLPP2,PLD1,ADCY5,DGKB,GNA12,PLA2G4A,MRAS,PRKCA,PLPP1,AGPAT5,RALGDS,GAB1,RAPGEF3,ADCY2,PLPP3,DNM3,PLD2,AGPAT4,PDGFRB,GRM3,AGT
REAC	Platelet activation, signaling and aggregation	REAC:R-MMU-76002	3.93438e-05	4.40512	235	1414	70	8748	DGKZ,DAGLB,ANXA5,STXBP2,TMX3,FYN,DGKI,DGKQ,PTK2,TOR4A,PROS1,STX4A,ADRA2A,ABCC4,PDPN,GNB5,DGKA,RHOB,PHACTR2,MAPK3,GNA13,PIK3R1,ITPR1,TEX264,HGF,LY6G6F,RAP1A,ABHD12,CD63,BCAR1,VAV3,LGALS3BP,APLP2,LAMP2,GNG7,GNG8,RARRES2,GNG12,PRKCD,DGKB,TGFB2,PSAP,GNA12,RHOG,GAS6,PLA2G4A,DAGLA,CDC37L1,ARRB1,GNG11,SCCPDH,SPARC,RAPGEF3,ABHD6,SCG3,ITPR2,VEGFA,RASGRP1,PRKCQ,GNAI1,TIMP3,TUBA4A,APP,STXBP3,CLU,MGLL,ITIH3,…
REAC	RHO GTPase cycle	REAC:R-MMU-9012999	6.75142e-05	4.17061	379	1414	100	8748	ARHGAP17,RAB7,ARHGAP24,SLK,RHPN1,RHOBTB2,GFOD1,WDR81,GIT2,CCDC88A,GIT1,WHAMM,SNAP23,CLTC,SH3BP1,MAP3K11,VANGL1,FAM13A,ANLN,PICALM,FRS3,TAOK3,WDR91,DBT,DLG5,NOXO1,KALRN,CHN2,SYDE2,ARHGEF18,HMOX2,NCKAP1,RHOB,DAAM1,ARHGAP31,GNA13,KCTD3,PIK3R1,PEAK1,ARHGEF9,ELMO2,CYFIP1,RHOC,RHOQ,ABI1,TJP2,MOSPD2,LMAN1,ARAP1,DDRGK1,VAV3,EMC3,DOCK1,ABCD3,WASF3,OCRL,RHPN2,FARP2,ARHGEF26,STARD8,SWAP70,CDC42EP2,TEX2,GJA1…
KEGG	Phosphatidylinositol signaling system	KEGG:04070	8.76705e-05	4.05715	94	1286	33	8714	DGKZ,PPIP5K1,DGKQ,CDIPT,ITPK1,INPP5B,INPP1,PIP4K2C,DGKA,PLCB4,IPPK,SYNJ1,PI4KA,PIK3R1,ITPR1,ITPKB,MTMR2,INPP5A,IP6K1,MTM1,OCRL,INPP5F,PLCD1,PLCB1,PLCE1,PIK3C2B,DGKB,PRKCA,CDS2,ITPR2,SYNJ2,PLCD4,PIP4K2A
REAC	Phospholipid metabolism	REAC:R-MMU-1483257	9.3469e-05	4.02933	173	1414	55	8748	INPP5K,PNPLA6,CHKB,PITPNM1,LPGAT1,CDIPT,ACP6,GDE1,STARD10,RUFY1,CEPT1,HADHB,PTDSS2,LCLAT1,PLEKHA8,SLC44A2,PIP4K2C,PIK3R1,MBOAT1,CPNE6,PLA2G15,PCYT1B,PTDSS1,MTMR2,ETNK1,SBF1,MTM1,GPD2,INPP5J,OCRL,AGPAT3,CHPT1,INPP5F,RAB4A,MBOAT2,DGAT2,PIK3C2B,ABHD4,SLC44A1,PCYT2,PLA2G4A,AGPAT5,PLEKHA1,CDS2,SYNJ2,LPCAT3,ENPP6,GPAM,PLD2,PIP4K2A,AGPAT4,ETNPPL,MGLL,MFSD2A,ABHD3
KEGG	cAMP signaling pathway	KEGG:04024	0.000174356	3.75856	218	1286	59	8714	PDE4A,LIPE,NFATC1,ATP1B1,ATP1A3,ADORA2A,MAP2K1,ABCC4,CREB5,MAPK3,ADRB1,PIK3R1,ACOX3,PTCH1,PPARA,PRKACB,SOX9,ADCY9,RAP1A,ATP2B4,ACOX1,VAV3,GLI3,GRIA4,ATP2A2,PPP1R1B,CAMK2D,ADCY8,RRAS,GRIA1,CREB3L2,PLD1,ADCY5,NPY,PLCE1,ATP1A1,MAPK10,SST,ADORA1,LHCGR,ATP1B3,ADCYAP1R1,HCN2,RAPGEF3,FXYD1,GRIA2,ADCY2,PAK1,EDNRA,PDE4B,GABBR1,GNAI1,CAMK2G,PLD2,ATP1A2,HHIP,ATP1B2,GRIN2C,GABBR2
REAC	SLC-mediated transmembrane transport	REAC:R-MMU-425407	0.000250227	3.60167	218	1414	64	8748	SLC22A15,SLC45A3,SLC4A3,SLC39A14,SLCO1B2,HEPH,SLC25A4,SLC2A8,SLC11A2,SLC25A29,SLC4A8,SRI,SLC26A11,AHCYL2,BSG,SLC5A11,SLC44A2,SLC3A2,SLC27A4,SLC35A2,SLC33A1,SLC35D1,SLC43A2,SLC16A1,SLC16A2,SLC6A6,SLC15A4,ARL2,SLC20A1,SLC20A2,SLC25A18,SLC22A4,SLC2A12,SLC50A1,CTNS,SLC26A6,SLC44A1,SLC12A4,SLC24A3,SLC13A3,SLC29A3,SLC8B1,SLC1A4,SLC1A3,SLC13A5,SLC7A2,SLC1A2,SLCO3A1,SLC41A1,SLC6A1,SLC9A9,SLC2A1,SLC30A10,…
REAC	Glycogen metabolism	REAC:R-MMU-8982491	0.000560953	3.25107	20	1414	13	8748	PHKB,PYGL,GYS1,PHKG2,GYG,UGP2,GAA,PGM2,AGL,PHKA1,PYGM,PHKG1,PPP1R3C
REAC	Effects of PIP2 hydrolysis	REAC:R-MMU-114508	0.000683122	3.1655	23	1414	14	8748	DGKZ,DAGLB,DGKI,DGKQ,DGKA,ITPR1,ABHD12,PRKCD,DGKB,DAGLA,ABHD6,ITPR2,PRKCQ,MGLL

## Sheet: TAPvsiNB DSG
Differentially spliced genes in the transition s-TAP vs s-iNB
#%result_name=Analysis_1
#%array_type=MTA-1_0
#%annotation=MTA-1_0.r3.na36.mm10.a1.transcript.csv
#%comparison=TAP vs iNB
ID	Fold Change	Expressed in Both Conditions	Gene Symbol	Description	Group	Exon Splicing Index	Exon P-val	Exon FDR P-val	Exon Event Name	Exon Event Score	Exon Expressed in At least One Condition
TC0200005498.mm.1	-23.75	T	Dlx1as	distal-less homeobox 1, antisense	NonCoding	55.4	3.55e-07	0.004			T
TC0600001828.mm.1	-32.16	T			NonCoding	39.31	1.75e-07	0.0024			T
TC0100000023.mm.1	-24.97	T	St18	suppression of tumorigenicity 18	Multiple_Complex	37.11	1.41e-09	0.0001			T
TC0600001830.mm.1	-26.24	T	Dlx6os1	distal-less homeobox 6, opposite strand 1; Dlx6 opposite strand transcript 1	NonCoding	31.57	6.81e-06	0.0176			T
TC0100000808.mm.1	2.9	T	Prss56	protease, serine 56	Multiple_Complex	24.3	4.32e-06	0.0143			T
TC0600003346.mm.1	-6.85	T	Lmo3	LIM domain only 3	Coding	23.19	6.98e-06	0.0178			T
TC1300002520.mm.1	-6.17	T	Map1b	microtubule-associated protein 1B	Multiple_Complex	22.5	3.43e-07	0.004			T
TC0100001382.mm.1	-7.59	T	Rnasel	ribonuclease L (2, 5-oligoisoadenylate synthetase-dependent); ribonuclease L (2', 5'-oligoisoadenylate synthetase-dependent)	Multiple_Complex	19.34	7.05e-06	0.0178			T
TC1900001729.mm.1	-11.86	T	Shtn1	shootin 1	Multiple_Complex	19.32	2.1e-06	0.0098			T
TC0400002812.mm.1	2.53	T	Tnc	tenascin C	Coding	19.28	1.85e-05	0.0308			T
TC1000002846.mm.1	-8.99	T	Nav3	neuron navigator 3	Multiple_Complex	18.53	1.17e-06	0.0075			T
TC0100003791.mm.1	-5.67	T	Prox1	prospero homeobox 1; prospero-related homeobox 1; prospero-related homeobox 1 (Prox1), mRNA.	Multiple_Complex	17.31	4.13e-05	0.0482			T
TC0X00003116.mm.1	-11.82	T	Dcx	doublecortin	Multiple_Complex	16.37	2.46e-05	0.0365	Alternative 3' Acceptor Site	0.23	T
TC1700000009.mm.1	-18.85	T	Tiam2	T cell lymphoma invasion and metastasis 2	Coding	15.02	2.78e-06	0.0113	Cassette Exon	0.21	T
TC0200005294.mm.1	1.06	T			NonCoding	13.61	1.06e-05	0.022			T
TC1100001568.mm.1	2.23	T	Erbb2	v-erb-b2 erythroblastic leukemia viral oncogene homolog 2, neuro/glioblastoma derived oncogene homolog (avian)	Multiple_Complex	12.83	9.92e-06	0.0214	Cassette Exon	0.32	T
TC0200001377.mm.1	4.42	T	Lrp4	low density lipoprotein receptor-related protein 4	Multiple_Complex	12.45	1.46e-05	0.0269			T
TC1400001288.mm.1	2.79	T	Cldn10	claudin 10	Coding	12.14	1.98e-06	0.0097	Cassette Exon	0.34	T
TC0500002865.mm.1	-5.02	T	Mapk10	mitogen-activated protein kinase 10; mitogen activated protein kinase 10	Multiple_Complex	11.43	5.24e-06	0.0154			T
TC0600001834.mm.1	-11.63	T	Dlx5	distal-less homeobox 5; Synthetic construct Mus musculus clone IMAGE:100014646, MGC:175458 distal-less homeobox 5 (Dlx5) mRNA, encodes complete protein.	Coding	11.3	3.29e-05	0.0427			T
TC0900002783.mm.1	-2.28	T	Snap91	synaptosomal-associated protein 91; synaptosomal-associated protein 91 (Snap91), mRNA.	Multiple_Complex	11.06	3.8e-06	0.0133			T
TC0100003565.mm.1	1.22	T	Atp1a4	ATPase, Na+/K+ transporting, alpha 4 polypeptide	Coding	10.81	6.28e-06	0.0168	Cassette Exon	0.26	T
TC0200003214.mm.1	1.82	T	Sardh	sarcosine dehydrogenase	Multiple_Complex	10.62	1.23e-05	0.0238	Cassette Exon	0.25	T
TC0200004154.mm.1	3.59	T	Tspan18	tetraspanin 18	Multiple_Complex	10.57	3.93e-05	0.0471			T
TC0100002758.mm.1	4.01	T	Ecel1	endothelin converting enzyme-like 1	Multiple_Complex	10.25	2.98e-06	0.0119	Cassette Exon	0.2	T
TC0800000592.mm.1	-1.75	T	Gpm6a	glycoprotein m6a	Multiple_Complex	10.2	2.51e-05	0.0367			T
TC1700001308.mm.1	-1.53	T	Cript	cysteine-rich PDZ-binding protein	Multiple_Complex	10.14	4.04e-05	0.0478			T
TC1800001088.mm.1	-9.84	T	Celf4	CUGBP, Elav-like family member 4	Multiple_Complex	9.97	5.52e-06	0.0157			T
TC0300000892.mm.1	-1.62	T	Sema6c	sema domain, transmembrane domain (TM), and cytoplasmic domain, (semaphorin) 6C; Synthetic construct Mus musculus clone IMAGE:100063292, MGC:191056 sema domain, transmembrane domain (TM), and cytoplasmic domain, (semaphorin) 6C (Sema6c) mRNA, encodes complete protein.; sema domain, transmembrane domain (TM), and cytoplasmic domain, (semaphorin) 6C (Sema6c), mRNA.	Multiple_Complex	9.1	5.65e-06	0.0157			T
TC0200000551.mm.1	1.7	T	Ass1; Gm5424	argininosuccinate synthetase 1; argininosuccinate synthase pseudogene	Multiple_Complex	8.91	1.7e-06	0.0091	Cassette Exon	0.29	T
TC0800001522.mm.1	-8.45	T	Tubb3	tubulin, beta 3 class III	Coding	8.71	1.16e-06	0.0075	Alternative 3' Acceptor Site	0.21	T
TC1100002755.mm.1	1.81	T	Pdlim4	PDZ and LIM domain 4	Multiple_Complex	8.63	8.45e-08	0.0016	Cassette Exon	0.25	T
TC0200000801.mm.1	-3.18	T	Kif5c	kinesin family member 5C	Multiple_Complex	8.52	1.7e-05	0.0294	Alternative 3' Acceptor Site	0.26	T
TC1100000417.mm.1	-10.03	T	Gabrb2	gamma-aminobutyric acid (GABA) A receptor, subunit beta 2	Multiple_Complex	8.4	1.54e-05	0.0279			T
TC1100001945.mm.1	-4.34	T	Mgat5b	mannoside acetylglucosaminyltransferase 5, isoenzyme B	Multiple_Complex	8.32	3.88e-05	0.047			T
TC1500002003.mm.1	1.66	T	Wnt7b	wingless-type MMTV integration site family, member 7B; wingless-related MMTV integration site 7B	Coding	8.11	8.68e-06	0.0199			T
TC0200001023.mm.1	-6.79	T	Gad1	glutamate decarboxylase 1	Multiple_Complex	7.94	1.18e-05	0.0231	Cassette Exon	0.29	T
TC0200001597.mm.1	-4.69	T	Mpped2	metallophosphoesterase domain containing 2	Multiple_Complex	7.84	3.95e-06	0.0135			T
TC0700000023.mm.1	4.07	T	Ttyh1	tweety homolog 1 (Drosophila)	Multiple_Complex	7.82	5.34e-07	0.0052			T
TC1400001524.mm.1	-3.91	T	Gng2	guanine nucleotide binding protein (G protein), gamma 2	Multiple_Complex	7.72	9.87e-07	0.007	Alternative 3' Acceptor Site	0.21	T
TC0500001634.mm.1	1.23	T	Tsc22d4	TSC22 domain family, member 4	Multiple_Complex	7.72	2.9e-05	0.0391			T
TC0900001455.mm.1	5.25	T	Cspg5	chondroitin sulfate proteoglycan 5	Multiple_Complex	7.71	1.97e-06	0.0097	Cassette Exon	0.3	T
TC0900002254.mm.1	-7.68	T	Ncam1	neural cell adhesion molecule 1	Multiple_Complex	7.61	1.76e-06	0.0093	Cassette Exon	0.23	T
TC0X00001682.mm.1	1.23	T	Gpm6b	glycoprotein m6b	Multiple_Complex	7.5	3.28e-05	0.0427			T
TC1300002747.mm.1	1.8	T	Nim1k	NIM1 serine/threonine protein kinase	Multiple_Complex	7.36	1.97e-08	0.0008	Cassette Exon	0.25	T
TC0300000871.mm.1	-5.35	T	Celf3	CUGBP, Elav-like family member 3; CUGBP, Elav-like family member 3 (Celf3), mRNA.	Multiple_Complex	7.34	2.78e-06	0.0113			T
TC0400002062.mm.1	1.35	T	Hes5	hairy and enhancer of split 5 (Drosophila)	Multiple_Complex	7.32	8.65e-06	0.0199	Alternative 5' Donor Site	0.27	T
TC1000002531.mm.1	-6.28	T	Atcay	ataxia, cerebellar, Cayman type homolog (human)	Multiple_Complex	7.31	1.71e-07	0.0024			T
TC0500000738.mm.1	1.56	T	Rest	RE1-silencing transcription factor	Multiple_Complex	7.01	3.24e-05	0.0426	Cassette Exon	0.22	T
TC0600001640.mm.1	-2.66	T	A830011K09Rik; RP24-272N4.1	RIKEN cDNA A830011K09 gene [Source:MGI Symbol;Acc:MGI:2442570]; Novel transcript; RIKEN cDNA A830011K09 gene	NonCoding	6.98	9.76e-06	0.0213			T
TC1200002148.mm.1	3.09	T	Dio2	deiodinase, iodothyronine, type II	Coding	6.86	1.63e-06	0.0089			T
TC0300000043.mm.1	-18.39	T	Stmn2	stathmin-like 2	Coding	6.85	1.7e-05	0.0294			T
TC1100004224.mm.1	2.65	T	Notum	notum pectinacetylesterase homolog (Drosophila)	Multiple_Complex	6.76	5.28e-06	0.0154	Cassette Exon	0.25	T
TC0200003245.mm.1	3.46	T	Ntng2; 6530402F18Rik	netrin G2; RIKEN cDNA 6530402F18 gene	Multiple_Complex	6.66	4.19e-08	0.0014	Alternative 3' Acceptor Site	0.24	T
TC0700002788.mm.1	3.93	T	Fxyd1	FXYD domain-containing ion transport regulator 1	Multiple_Complex	6.64	1.85e-05	0.0308	Cassette Exon	0.27	T
TC0400003629.mm.1	-1.43	T	Serinc2	serine incorporator 2	Coding	6.63	9.21e-06	0.0203			T
TC0600000038.mm.1	-4.81	T	Dlx6	distal-less homeobox 6; Synthetic construct Mus musculus clone IMAGE:100064069, MGC:193440 distal-less homeobox 6 (Dlx6) mRNA, encodes complete protein.	Multiple_Complex	6.54	1.95e-06	0.0097			T
TC0300002797.mm.1	4.03	T	S1pr1	sphingosine-1-phosphate receptor 1	Coding	6.48	6.15e-08	0.0016			T
TC0200003529.mm.1	-3.55	T	Neb	nebulin	Multiple_Complex	6.29	3.37e-06	0.0123			T
TC1600001884.mm.1	-5.19	T	Robo2	roundabout homolog 2 (Drosophila)	Multiple_Complex	6.27	3.3e-07	0.004	Alternative 3' Acceptor Site	0.21	T
TC0400002713.mm.1	1.68	T	Epb41l4b	erythrocyte membrane protein band 4.1 like 4b	Multiple_Complex	6.23	2.66e-05	0.0376			T
TC1000002729.mm.1	-5.89	T	Nudt4	nudix (nucleoside diphosphate linked moiety X)-type motif 4	Coding	6.21	8.75e-07	0.0068			T
TC0100000778.mm.1	1.51	T	2810459M11Rik	RIKEN cDNA 2810459M11 gene	Coding	6.2	2.88e-05	0.0389	Alternative 5' Donor Site	0.27	T
TC1300000718.mm.1	3.61	T	Ntrk2	neurotrophic tyrosine kinase, receptor, type 2; neurotrophic tyrosine kinase, receptor, type 2 (Ntrk2), transcript variant 1, mRNA.	Multiple_Complex	6.19	3.03e-05	0.0402	Cassette Exon	0.31	T
TC0600001095.mm.1	-1.67	T	Fgd5	FYVE, RhoGEF and PH domain containing 5	Multiple_Complex	6.18	2.28e-07	0.0029			T
TC1000001286.mm.1	-2.49	T	Osbpl8	oxysterol binding protein-like 8	Multiple_Complex	6.03	2.39e-05	0.0359			T
TC0900000720.mm.1	-2.9	T	Sema7a	sema domain, immunoglobulin domain (Ig), and GPI membrane anchor, (semaphorin) 7A	Multiple_Complex	6.02	2.78e-05	0.0381			T
TC0500000422.mm.1	-4.83	T	Crmp1	collapsin response mediator protein 1; collapsin response mediator protein 1 (Crmp1), transcript variant 1, mRNA.	Multiple_Complex	5.93	5.66e-06	0.0157	Cassette Exon	0.23	T
TC1100002733.mm.1	1.47	T	Sowaha	sosondowah ankyrin repeat domain family member A	Coding	5.83	2.77e-07	0.0034	Alternative 5' Donor Site	0.27	T
TC0400002587.mm.1	-4.22	T	Igfbpl1	insulin-like growth factor binding protein-like 1	Multiple_Complex	5.83	7.87e-08	0.0016			T
TC1800000105.mm.1	-4.09	T	Ttc39c	tetratricopeptide repeat domain 39C	Multiple_Complex	5.81	3.03e-05	0.0402	Alternative 5' Donor Site	0.26	T
TC0900002113.mm.1	2.05	T	Sorl1	sortilin-related receptor, LDLR class A repeats-containing; Synthetic construct Mus musculus clone IMAGE:100069522, MGC:199424 sortilin-related receptor, LDLR class A repeats-containing (Sorl1) mRNA, encodes complete protein.	Multiple_Complex	5.8	1.01e-05	0.0215	Cassette Exon	0.21	T
TC1900000714.mm.1	-5.48	T	Ina	internexin neuronal intermediate filament protein, alpha	Coding	5.76	2.69e-05	0.0376			T
TC0500000640.mm.1	-4.31	T	Uchl1	ubiquitin carboxy-terminal hydrolase L1	Multiple_Complex	5.7	9.73e-06	0.0213	Alternative 3' Acceptor Site	0.26	T
TC0700002497.mm.1	3.28	T	Apoe	apolipoprotein E	Coding	5.63	3.41e-06	0.0124			T
TC0500000299.mm.1	-4.69	T	Dpysl5	dihydropyrimidinase-like 5	Multiple_Complex	5.57	1.05e-05	0.0219			T
TC0700002759.mm.1	-4.47	T	Aplp1	amyloid beta (A4) precursor-like protein 1	Coding	5.34	5.08e-08	0.0016	Cassette Exon	0.26	T
TC1900000309.mm.1	2.6	T	Gna14	guanine nucleotide binding protein, alpha 14	Coding	5.33	2.34e-05	0.0354			T
TC0500003093.mm.1	-1.25	T	Rnf10	ring finger protein 10	Multiple_Complex	5.31	4.13e-05	0.0482			T
TC0500000871.mm.1	1.21	T	Art3	ADP-ribosyltransferase 3; Synthetic construct Mus musculus clone IMAGE:100063914, MGC:193381 Art3 protein (Art3) mRNA, encodes complete protein.	Multiple_Complex	5.3	7.55e-07	0.0063			T
TC0500003482.mm.1	1.2	T	Pdgfa	platelet derived growth factor, alpha	Multiple_Complex	5.29	3.31e-06	0.0123	Alternative 5' Donor Site	0.25	T
TC0400001416.mm.1	1.06	T	4933407E24Rik	RIKEN cDNA 4933407E24 gene	NonCoding	5.24	1.87e-05	0.031			T
TC0500003008.mm.1	-3.67	T	E130006D01Rik	RIKEN cDNA E130006D01 gene	NonCoding	5.17	4.16e-06	0.014			T
TC1000002493.mm.1	1.82	T	Gamt	guanidinoacetate methyltransferase	Multiple_Complex	5.07	3.08e-06	0.0119	Cassette Exon	0.29	T
TC0400001712.mm.1	2.42	T	Rap1gap	Rap1 GTPase-activating protein	Multiple_Complex	5	2.84e-05	0.0385			T
TC0200005150.mm.1	2.33	T	Slc13a3	solute carrier family 13 (sodium-dependent dicarboxylate transporter), member 3	Multiple_Complex	4.94	3.61e-06	0.0129	Cassette Exon	0.3	T
TC0200003365.mm.1	1.33	T	Ggta1	glycoprotein galactosyltransferase alpha 1, 3	Multiple_Complex	4.94	1.76e-05	0.03	Cassette Exon	0.23	T
TC0200003176.mm.1	1.22	T	Nacc2	nucleus accumbens associated 2, BEN and BTB (POZ) domain containing	Multiple_Complex	4.91	1.48e-05	0.0272	Alternative 5' Donor Site	0.22	T
TC0400000855.mm.1	-1.61	T	Sh3gl2	SH3-domain GRB2-like 2	Coding	4.91	1.63e-05	0.0288			T
TC1600000571.mm.1	2.66	T	Lsamp	limbic system-associated membrane protein; Synthetic construct Mus musculus clone IMAGE:100016504, MGC:184562 limbic system-associated membrane protein (Lsamp) mRNA, encodes complete protein.	Multiple_Complex	4.89	1.61e-05	0.0287	Cassette Exon	0.28	T
TC0900001892.mm.1	-3.99	T	Elavl3	ELAV (embryonic lethal, abnormal vision, Drosophila)-like 3 (Hu antigen C)	Multiple_Complex	4.87	2.52e-06	0.0107			T
TC0500001466.mm.1	2.49	T	Tmem132b	transmembrane protein 132B	Multiple_Complex	4.85	1.88e-05	0.031	Cassette Exon	0.25	T
TC0100001698.mm.1	-1.21	T	Cnst	consortin, connexin sorting protein	Multiple_Complex	4.81	3.06e-05	0.0405			T
TC1400002180.mm.1	16.3	T	Tnfrsf19	tumor necrosis factor receptor superfamily, member 19	Coding	4.74	8.03e-09	0.0007			T
TC0500000819.mm.1	1.56	T	Slc4a4	solute carrier family 4 (anion exchanger), member 4; Synthetic construct Mus musculus clone IMAGE:100068154, MGC:195771 solute carrier family 4 (anion exchanger), member 4 (Slc4a4) mRNA, encodes complete protein.	Multiple_Complex	4.66	4.56e-06	0.0147			T
TC1000000193.mm.1	4.8	T	Vnn1	vanin 1	Coding	4.55	4.3e-05	0.0496			T
TC0200002437.mm.1	-5.71	T	Slc32a1	solute carrier family 32 (GABA vesicular transporter), member 1	Coding	4.54	1.07e-08	0.0007	Cassette Exon	0.23	T
TC1600001319.mm.1	-2.27	T	Gp1bb; Sept5	glycoprotein Ib, beta polypeptide; septin 5	Coding	4.46	9.77e-07	0.007			T
TC0400001024.mm.1	2.22	T	Raver2	ribonucleoprotein, PTB-binding 2	Multiple_Complex	4.4	8.8e-07	0.0068			T
TC0500001860.mm.1	-2.73	T	Fry	furry homolog (Drosophila)	Multiple_Complex	4.38	6.85e-07	0.0059			T
TC1100003567.mm.1	2.58	T	Acsf2	acyl-CoA synthetase family member 2	Multiple_Complex	4.38	1.49e-05	0.0272			T
TC1300000735.mm.1	-1.74	T	Dapk1	death associated protein kinase 1; death associated protein kinase 1 (Dapk1), transcript variant 1, mRNA.	Multiple_Complex	4.32	8.79e-06	0.0199			T
TC1400001078.mm.1	-3.49	T	Enox1	ecto-NOX disulfide-thiol exchanger 1	Multiple_Complex	4.32	1.18e-08	0.0007			T
TC0600000281.mm.1	-2.37	T			NonCoding	4.31	3.61e-05	0.0448	Cassette Exon	0.25	T
TC1100004067.mm.1	-1.39	T	Hid1	HID1 domain containing	Multiple_Complex	4.29	1.69e-05	0.0294			T
TC1300002392.mm.1	-4.02	T	Vcan	versican	Multiple_Complex	4.28	1.16e-05	0.0228	Alternative 5' Donor Site	0.29	T
TC1500001734.mm.1	1.1	T	Gm3142	PREDICTED: predicted gene 3142 (Gm3142), mRNA.	Coding	4.15	3.9e-06	0.0134			T
TC1200000951.mm.1	-5.1	T	Flrt2	fibronectin leucine rich transmembrane protein 2	Multiple_Complex	4.14	3.13e-06	0.012	Cassette Exon	0.22	T
TC0600000014.mm.1	-5.28	T	Peg10	paternally expressed 10; Synthetic construct Mus musculus clone IMAGE:100062263, MGC:190439 paternally expressed 10 (Peg10) mRNA, encodes complete protein.	Coding	4.11	5.23e-06	0.0154			T
TC0300002802.mm.1	2.39	T	Vcam1	vascular cell adhesion molecule 1	Coding	4.09	4.81e-06	0.015			T
TC1300002629.mm.1	-3.78	T	Zswim6	zinc finger SWIM-type containing 6	Multiple_Complex	4.04	2.08e-06	0.0098			T
TC1000000402.mm.1	-14.69	T	Cd24a	CD24a antigen	Coding	4.03	2.48e-06	0.0107			T
TC0100003129.mm.1	-3.53	T	Nav1	neuron navigator 1	Multiple_Complex	4.02	2.47e-05	0.0365	Cassette Exon	0.21	T
TC1100001624.mm.1	3.49	T	Fkbp10	FK506 binding protein 10	Multiple_Complex	3.95	2.51e-05	0.0367			T
TC0400001034.mm.1	2.02	T	Ak4	adenylate kinase 4	Multiple_Complex	3.89	4.12e-05	0.0482	Alternative 5' Donor Site	0.28	T
TC0600002560.mm.1	-2.44	T	Wbp1	WW domain binding protein 1	Multiple_Complex	3.87	7.14e-06	0.0179	Alternative 3' Acceptor Site	0.25	T
TC0100003566.mm.1	10.57	T	Atp1a2	ATPase, Na+/K+ transporting, alpha 2 polypeptide	Multiple_Complex	3.87	1.18e-05	0.0231			T
TC0100003409.mm.1	2.45	T	Prrx1	paired related homeobox 1	Multiple_Complex	3.86	3.01e-05	0.0402	Cassette Exon	0.24	T
TC1500002243.mm.1	-2.87	T	Pou6f1	POU domain, class 6, transcription factor 1	Multiple_Complex	3.85	5.73e-06	0.0158			T
TC0300002035.mm.1	-3.14	T	Pfn2	profilin 2	Coding	3.83	1.02e-06	0.007	Alternative 3' Acceptor Site	0.23	T
TC1000001090.mm.1	-2.06	T	Anks1b	ankyrin repeat and sterile alpha motif domain containing 1B	Multiple_Complex	3.82	8.34e-07	0.0067			T
TC0100002308.mm.1	-1.85	T	Myo1b	myosin IB	Multiple_Complex	3.8	4.22e-05	0.0489	Cassette Exon	0.24	T
TC0500001756.mm.1	2.54	T	Nptx2	neuronal pentraxin 2	Coding	3.8	2.57e-05	0.0371			T
TC0100000404.mm.1	-3	T	Plcl1	phospholipase C-like 1	Coding	3.77	3.75e-05	0.046			T
TC1700000835.mm.1	1.81	T	Pla2g7	phospholipase A2, group VII (platelet-activating factor acetylhydrolase, plasma)	Multiple_Complex	3.69	3.88e-06	0.0134			T
TC1500000982.mm.1	-3.28	T	Cacnb3	calcium channel, voltage-dependent, beta 3 subunit; Synthetic construct Mus musculus clone IMAGE:100063891, MGC:193358 calcium channel, voltage-dependent, beta 3 subunit (Cacnb3) mRNA, encodes complete protein.; calcium channel, voltage-dependent, beta 3 subunit (Cacnb3), transcript variant 2, mRNA.; calcium channel, voltage-dependent, beta 3 subunit (Cacnb3), transcript variant 1, mRNA.	Coding	3.65	1.03e-05	0.0218			T
TC0500001628.mm.1	-1.86	T	Actl6b	actin-like 6B	Multiple_Complex	3.61	2.55e-05	0.0371			T
TC1100002003.mm.1	2.17	T	Rnf213	ring finger protein 213	Multiple_Complex	3.58	2.61e-05	0.0374			T
TC0300003246.mm.1	1.33	T	Gstm3	glutathione S-transferase, mu 3	Coding	3.58	3.4e-06	0.0124	Cassette Exon	0.27	T
TC0600000145.mm.1	1.07	T	Cftr	cystic fibrosis transmembrane conductance regulator	Multiple_Complex	3.55	2.48e-05	0.0365			T
TC1300001171.mm.1	-1.2	T	Cenpk	centromere protein K; Synthetic construct Mus musculus clone IMAGE:100015025, MGC:180340 centromere protein K (Cenpk) mRNA, encodes complete protein.; centromere protein K (Cenpk), transcript variant 2, mRNA.; centromere protein K (Cenpk), transcript variant 1, mRNA.	Multiple_Complex	3.53	7.87e-08	0.0016			T
TC0300002736.mm.1	1.46	T	Sypl2	synaptophysin-like 2	Coding	3.52	5.59e-06	0.0157			T
TC0700003512.mm.1	-5.92	T	St8sia2	ST8 alpha-N-acetyl-neuraminide alpha-2,8-sialyltransferase 2	Coding	3.49	1.94e-05	0.0317			T
TC0X00003437.mm.1	1.05	T	Il2rg	interleukin 2 receptor, gamma chain	Multiple_Complex	3.49	4.09e-05	0.0482	Alternative 3' Acceptor Site	0.22	T
TC0800000013.mm.1	-2.6	T	Camsap3	calmodulin regulated spectrin-associated protein family, member 3	Coding	3.44	1.02e-06	0.007	Cassette Exon	0.2	T
TC0900002322.mm.1	2.1	T	Acsbg1; Gm2069	acyl-CoA synthetase bubblegum family member 1; PREDICTED: predicted gene 2069 (Gm2069), miscRNA.	Multiple_Complex	3.37	7.69e-06	0.0186			T
TC0700000412.mm.1	-2	T	Tmem145	transmembrane protein 145	Multiple_Complex	3.3	5.68e-07	0.0052			T
TC0200003118.mm.1	-2.44	T	Cacna1b	calcium channel, voltage-dependent, N type, alpha 1B subunit	Multiple_Complex	3.29	2.21e-05	0.0341			T
TC0X00001931.mm.1	-2.38	T	Syn1	synapsin I	Coding	3.27	2.1e-05	0.0334			T
TC0800002577.mm.1	-3.25	T	Zswim4	zinc finger SWIM-type containing 4	Multiple_Complex	3.27	2.22e-05	0.0341			T
TC1100002512.mm.1	2.22	T	Wwc1	WW, C2 and coiled-coil domain containing 1	Multiple_Complex	3.24	3.86e-05	0.0469			T
TC1400001599.mm.1	2.12	T	Zcchc24	zinc finger, CCHC domain containing 24	Multiple_Complex	3.24	1.84e-05	0.0308			T
TC1800001139.mm.1	-2.15	T	Nrep	neuronal regeneration related protein	Multiple_Complex	3.24	2.04e-05	0.0326			T
TC1600001371.mm.1	-1.63	T	Gm26744	predicted gene, 26744 [Source:MGI Symbol;Acc:MGI:5477238]	NonCoding	3.23	5.63e-06	0.0157			T
TC0500001443.mm.1	-1.21	T	Setd8	SET domain containing (lysine methyltransferase) 8	Multiple_Complex	3.21	2.21e-05	0.0341			T
TC1600000335.mm.1	-3	T	St6gal1	beta galactoside alpha 2,6 sialyltransferase 1	Multiple_Complex	3.21	1.87e-06	0.0097			T
TC0900002388.mm.1	-2.65	T	Islr2	immunoglobulin superfamily containing leucine-rich repeat 2	Coding	3.19	1.45e-05	0.0269			T
TC0600002861.mm.1	-1.44	T	Pdzrn3	PDZ domain containing RING finger 3	Multiple_Complex	3.18	3.59e-05	0.0447			T
TC1500001977.mm.1	-2.81	T	Ttll1	tubulin tyrosine ligase-like 1	Multiple_Complex	3.18	4.26e-05	0.0492			T
TC0700000941.mm.1	-3.58	T	Gabrb3	gamma-aminobutyric acid (GABA) A receptor, subunit beta 3; Synthetic construct Mus musculus clone IMAGE:100016561, MGC:184489 gamma-aminobutyric acid (GABA-A) receptor, subunit beta 3 (Gabrb3) mRNA, encodes complete protein.	Multiple_Complex	3.18	3.65e-05	0.0452			T
TC0700003464.mm.1	-2.83	T	Arrdc4	arrestin domain containing 4	Multiple_Complex	3.15	2.06e-06	0.0098			T
TC0700002695.mm.1	-1.66	T	Plekhg2	pleckstrin homology domain containing, family G (with RhoGef domain) member 2	Multiple_Complex	3.12	6.27e-06	0.0168			T
TC0400004120.mm.1	3.47	T	5930403L14Rik	RIKEN cDNA 5930403L14 gene; RIKEN cDNA 5930403L14 gene (5930403L14Rik), non-coding RNA.	Multiple_Complex	3.12	3.77e-05	0.0461			T
TC0200001071.mm.1	-2.76	T	Sp9	trans-acting transcription factor 9	Multiple_Complex	3.06	5.98e-07	0.0054			T
TC0300002277.mm.1	-2.83	T	Cd1d1	CD1d1 antigen	Multiple_Complex	3.06	1.23e-06	0.0077			T
TC0100003338.mm.1	-3.28	T	Brinp2	bone morphogenic protein/retinoic acid inducible neural-specific 2	Multiple_Complex	3.03	2.82e-05	0.0384			T
TC1400000780.mm.1	1.04	T	Cpne6	copine VI	Multiple_Complex	3.03	1.64e-06	0.0089			T
TC1300002426.mm.1	2.45	T	Thbs4	thrombospondin 4	Multiple_Complex	3.02	4.16e-05	0.0486			T
TC0600002553.mm.1	-1.18	T	Sema4f	sema domain, immunoglobulin domain (Ig), TM domain, and short cytoplasmic domain (Sema4f), transcript variant 2, mRNA.; sema domain, immunoglobulin domain (Ig), TM domain, and short cytoplasmic domain	Multiple_Complex	3.02	2.25e-05	0.0344			T
TC1200002411.mm.1	2.11	T	Ckb	creatine kinase, brain	Multiple_Complex	2.97	2.68e-05	0.0376			T
TC0200002411.mm.1	-2.74	T	Nnat	neuronatin	Multiple_Complex	2.82	5.25e-06	0.0154			T
TC0400000381.mm.1	1.26	T	Il11ra1	interleukin 11 receptor, alpha chain 1	Multiple_Complex	2.78	9.95e-06	0.0214			T
TC1200001885.mm.1	1.62	T	Pygl	liver glycogen phosphorylase	Multiple_Complex	2.78	3.97e-05	0.0474			T
TC0X00003287.mm.1	-2.52	T	Nhs	Nance-Horan syndrome (human)	Multiple_Complex	2.74	3.18e-05	0.0419			T
TC1300002279.mm.1	-3.4	T	Ube2ql1	ubiquitin-conjugating enzyme E2Q family-like 1	Multiple_Complex	2.73	3.69e-06	0.0131			T
TC1000002239.mm.1	-1.48	T	Sgpl1	sphingosine phosphate lyase 1	Multiple_Complex	2.72	3.43e-05	0.0433			T
TC0100001581.mm.1	-1.95	T	Adamts4	a disintegrin-like and metallopeptidase (reprolysin type) with thrombospondin type 1 motif, 4	Coding	2.72	3.37e-06	0.0123			T
TC1100001550.mm.1	-1.35	T	Lasp1	LIM and SH3 protein 1	Multiple_Complex	2.69	2.7e-05	0.0376			T
TC0100001201.mm.1	-2.22	T	Pik3c2b	phosphoinositide-3-kinase, class 2, beta polypeptide	Multiple_Complex	2.66	1.72e-05	0.0296			T
TC0100002413.mm.1	-1.88	T	Raph1	Ras association (RalGDS/AF-6) and pleckstrin homology domains 1	Multiple_Complex	2.62	2.73e-05	0.0378			T
TC0900003040.mm.1	9.76	T	Slc38a3	solute carrier family 38, member 3	Multiple_Complex	2.61	3.93e-05	0.0471			T
TC0200000302.mm.1	-2.14	T	Bmi1	Bmi1 polycomb ring finger oncogene	Multiple_Complex	2.6	1.8e-05	0.0305			T
TC1300000908.mm.1	-2.27	T	Pcsk1	proprotein convertase subtilisin/kexin type 1	Multiple_Complex	2.58	1.01e-05	0.0215			T
TC0700002644.mm.1	3.37	T	Axl	AXL receptor tyrosine kinase	Multiple_Complex	2.57	2.69e-05	0.0376			T
TC1700000754.mm.1	-1.85	T	Gabbr1	gamma-aminobutyric acid (GABA) B receptor, 1	Multiple_Complex	2.57	3.99e-05	0.0475			T
TC1100000294.mm.1	-3.69	T	Ccdc88a	coiled coil domain containing 88A; coiled coil domain containing 88A (Ccdc88a), mRNA.	Multiple_Complex	2.54	3.41e-05	0.0432			T
TC1500001872.mm.1	-1.91	T	Csnk1e	casein kinase 1, epsilon	Multiple_Complex	2.52	2.02e-05	0.0324			T
TC0700002763.mm.1	-2.47	T	Arhgap33	Rho GTPase activating protein 33; Rho GTPase activating protein 33 (Arhgap33), mRNA.	Coding	2.51	5.06e-06	0.0154			T
TC1000000131.mm.1	-2.91	T	Nhsl1	NHS-like 1	Multiple_Complex	2.5	9.13e-06	0.0203			T
TC0600003539.mm.1	-1.86	T	D630045J12Rik	RIKEN cDNA D630045J12 gene	Multiple_Complex	2.49	1.46e-05	0.0269			T
TC1500000002.mm.1	2.15	T	Sepp1	selenoprotein P, plasma, 1	Multiple_Complex	2.46	2.5e-05	0.0367			T
TC0900002956.mm.1	2.09	T	Ephb1	Eph receptor B1	Multiple_Complex	2.45	5.61e-06	0.0157			T
TC0100001606.mm.1	-1.72	T	Pex19	peroxisomal biogenesis factor 19	Multiple_Complex	2.45	4.45e-06	0.0145			T
TC0900002105.mm.1	1.09	T	Crtam	cytotoxic and regulatory T cell molecule; cytotoxic and regulatory T cell molecule (Crtam), mRNA.	Coding	2.45	7.72e-06	0.0186			T
TC1700002783.mm.1	-1.07	T	Gpsm3	G-protein signalling modulator 3 (AGS3-like, C. elegans)	Coding	2.44	2.19e-05	0.034	Intron Retention	0.24	T
TC1500001830.mm.1	1.06	T	Tex33	testis expressed 33	Coding	2.42	4.12e-05	0.0482			T
TC1700000572.mm.1	-1.14	T	Zfp952	zinc finger protein 952	Multiple_Complex	2.42	1.83e-05	0.0308			T
TC0700000296.mm.1	-1.79	T	Rtn2	reticulon 2 (Z-band associated protein); reticulon 2 (Z-band associated protein) (Rtn2), transcript variant B, mRNA.	Coding	2.41	2.77e-06	0.0113			T
TC0500003000.mm.1	-1.9	T	Ulk1	unc-51 like kinase 1	Multiple_Complex	2.38	3.8e-05	0.0463			T
TC0700001896.mm.1	-1.09	T	Plpp4	phospholipid phosphatase 4	Coding	2.37	3.53e-05	0.0442			T
TC1300002679.mm.1	-1.01	T	Il31ra	interleukin 31 receptor A	Coding	2.36	8.99e-08	0.0016			T
TC1300002059.mm.1	-2.36	T	Dbn1	drebrin 1	Multiple_Complex	2.34	2.27e-05	0.0346			T
TC1700002597.mm.1	-3.09	T	Slc8a1	solute carrier family 8 (sodium/calcium exchanger), member 1; solute carrier family 8 (sodium/calcium exchanger), member 1 (Slc8a1), transcript variant B, mRNA.	Multiple_Complex	2.31	3.04e-06	0.0119			T
TC0300002938.mm.1	-2.26	T	Ccdc109b	coiled-coil domain containing 109B	Coding	2.3	3.27e-05	0.0427			T
TC1600001373.mm.1	-1.26	T	Tmem41a	transmembrane protein 41a	Multiple_Complex	2.25	5e-06	0.0154			T
TC0X00002770.mm.1	1.03	T	4930519F16Rik	RIKEN cDNA 4930519F16 gene	Multiple_Complex	2.21	2.55e-05	0.0371			T
TC0400002098.mm.1	-1.73	T	Acap3	ArfGAP with coiled-coil, ankyrin repeat and PH domains 3	Multiple_Complex	2.18	8.92e-06	0.02			T
TC1100001687.mm.1	-2.67	T	Rundc3a	RUN domain containing 3A	Multiple_Complex	2.14	1.1e-05	0.0224			T
TC0200002077.mm.1	-2.56	T	Snap25	synaptosomal-associated protein 25	Multiple_Complex	2.13	1.94e-05	0.0317			T
TC0X00000963.mm.1	-1.54	T	Dlg3	discs, large homolog 3 (Drosophila)	Multiple_Complex	2.1	8e-06	0.0189			T
TC1100001482.mm.1	-1.16	T	Snf8	SNF8, ESCRT-II complex subunit, homolog (S. cerevisiae)	Multiple_Complex	2.08	3.25e-06	0.0122			T
TC1700002431.mm.1	-1.43	T	Mtcl1	microtubule crosslinking factor 1	Multiple_Complex	2.07	2.06e-05	0.0327			T
TC0100001387.mm.1	2.39	T	Glul; Mir8114	glutamate-ammonia ligase (glutamine synthetase); microRNA 8114	Multiple_Complex	2.02	1.11e-06	0.0074			T
TC0400001592.mm.1	-1.3	T	Dnajc8	DnaJ (Hsp40) homolog, subfamily C, member 8	Multiple_Complex	1.98	2.58e-05	0.0371			T
TC0800002723.mm.1	-1.3	T	Nudt21	nudix (nucleoside diphosphate linked moiety X)-type motif 21	Multiple_Complex	1.94	3.41e-05	0.0432			T
TC1100003471.mm.1	-1.25	T	Gm11491; RP23-352L3.6	predicted gene 11491 [Source:MGI Symbol;Acc:MGI:3651138]; novel transcript, antisense to Fam33a	NonCoding	1.93	3.98e-05	0.0475			T
TC0300001802.mm.1	-2.43	T	Gnb4	guanine nucleotide binding protein (G protein), beta 4	Multiple_Complex	1.91	3.72e-05	0.0458			T
TC0500001972.mm.1	1.07	T	Gm9758	predicted gene 9758	Multiple_Complex	1.89	1.56e-05	0.0282			T
TC0200005246.mm.1	1.47	T			NonCoding	1.86	1.14e-05	0.0227			T
TC0400002465.mm.1	-1.34	T	Dcaf12	DDB1 and CUL4 associated factor 12	Multiple_Complex	1.82	2.65e-05	0.0376			T
TC1000000901.mm.1	-1.05	T	Gm16105; AC159474.3	predicted gene 16105 [Source:MGI Symbol;Acc:MGI:3801737]; putative novel transcript	NonCoding	1.81	1.57e-05	0.0282			T
TC1100002896.mm.1	1.48	T			NonCoding	1.69	1.21e-05	0.0237			T
TC1000000111.mm.1	1.03	T	Gm16234; RP24-430N21.3	predicted gene 16234 [Source:MGI Symbol;Acc:MGI:3801867]; novel transcript	NonCoding	1.64	1.67e-05	0.0293			T
TC0600000193.mm.1	2.5	T	Ptprz1	protein tyrosine phosphatase, receptor type Z, polypeptide 1	Coding	-1.8	2.05e-06	0.0098			T
TC0100001204.mm.1	1.85	T	Plekha6	pleckstrin homology domain containing, family A member 6	Multiple_Complex	-1.81	1.87e-05	0.031			T
TC0300002451.mm.1	1.01	T	BC021767	cingulin pseudogene; cDNA sequence BC021767	Multiple_Complex	-2.11	3.14e-05	0.0416			T
TC1200001902.mm.1	-1.7	T	Rtn1	reticulon 1	Multiple_Complex	-2.17	3.34e-05	0.0431			T
TC1600002082.mm.1	1.47	T	Gart	phosphoribosylglycinamide formyltransferase	Multiple_Complex	-2.18	4e-05	0.0475			T
TC1600000305.mm.1	-2.84	T	Map3k13	mitogen-activated protein kinase kinase kinase 13	Multiple_Complex	-2.2	2.61e-05	0.0374			T
TC0400002665.mm.1	2.55	T	Abca1	ATP-binding cassette, sub-family A (ABC1), member 1; Synthetic construct Mus musculus clone IMAGE:100069521, MGC:199423 ATP-binding cassette, sub-family A (ABC1), member 1 (Abca1) mRNA, encodes complete protein.	Multiple_Complex	-2.23	5.42e-07	0.0052			T
TC1400000763.mm.1	5.78	T	Cmtm5	CKLF-like MARVEL transmembrane domain containing 5	Coding	-2.24	3.4e-05	0.0432			T
TC0700003844.mm.1	2.92	T	Inppl1	inositol polyphosphate phosphatase-like 1	Coding	-2.28	2.4e-05	0.036			T
TC0800001033.mm.1	2.68	T	Nkd1	naked cuticle 1 homolog (Drosophila)	Multiple_Complex	-2.29	2.75e-05	0.0378			T
TC1000000874.mm.1	1.35	T	Sppl2b	signal peptide peptidase like 2B	Multiple_Complex	-2.3	1.69e-05	0.0294			T
TC1400002280.mm.1	-1.71	T	Dpysl2	dihydropyrimidinase-like 2	Multiple_Complex	-2.3	1.11e-05	0.0224			T
TC0600001825.mm.1	-3.59	T			NonCoding	-2.34	3.6e-05	0.0447			T
TC1000001625.mm.1	2.48	T	Cd63	CD63 antigen	Coding	-2.37	3.6e-05	0.0447			T
TC1100001938.mm.1	1.16	T	Gm11744	predicted gene 11744	Multiple_Complex	-2.42	2.39e-05	0.0359			T
TC1600001379.mm.1	2.77	T	Etv5	ets variant 5; ets variant gene 5	Multiple_Complex	-2.48	9.85e-06	0.0214			T
TC1600001679.mm.1	2.76	T	Pvrl3	poliovirus receptor-related 3	Multiple_Complex	-2.5	8.54e-06	0.0198			T
TC0600002936.mm.1	1.77	T	Atp2b2	ATPase, Ca++ transporting, plasma membrane 2	Multiple_Complex	-2.51	7.51e-06	0.0185			T
TC1100000979.mm.1	2.86	T	Wscd1	WSC domain containing 1	Multiple_Complex	-2.55	2.32e-05	0.0351			T
TC1000002543.mm.1	-1.52	T	Celf5	CUGBP, Elav-like family member 5	Multiple_Complex	-2.64	2.79e-05	0.0381			T
TC0200002772.mm.1	2.64	T	Cdh4	cadherin 4; Synthetic construct Mus musculus clone IMAGE:100066328, MGC:195465 cadherin 4 (Cdh4) mRNA, encodes complete protein.	Multiple_Complex	-2.67	1.3e-05	0.0249			T
TC1900000787.mm.1	2.58	T	Tcf7l2	transcription factor 7 like 2, T cell specific, HMG box	Multiple_Complex	-2.69	6.33e-06	0.0168			T
TC0200001448.mm.1	-2.75	T	Trp53i11	transformation related protein 53 inducible protein 11	Multiple_Complex	-2.7	3.98e-06	0.0135			T
TC0900002455.mm.1	1.6	T	Glce; Mir5133	glucuronyl C5-epimerase; microRNA 5133	Multiple_Complex	-2.77	8.81e-06	0.0199			T
TC0300003041.mm.1	3.02	T	Bmpr1b	bone morphogenetic protein receptor, type 1B; bone morphogenetic protein receptor, type 1B (Bmpr1b), mRNA.	Coding	-2.84	3.28e-05	0.0427			T
TC0400004119.mm.1	3.81	T	Prdm16	PR domain containing 16	Multiple_Complex	-2.97	2.19e-05	0.034			T
TC0300002342.mm.1	-1.77	T	Trim46	tripartite motif-containing 46	Multiple_Complex	-3.06	6.3e-06	0.0168			T
TC0700004666.mm.1	2.39	T	Fgfr2	fibroblast growth factor receptor 2; fibroblast growth factor receptor 2 (Fgfr2), transcript variant 1, mRNA.; fibroblast growth factor receptor 2 (Fgfr2), transcript variant 2, mRNA.	Multiple_Complex	-3.07	2.72e-05	0.0377			T
TC0100001282.mm.1	-1.48	T	Gm4258; Gm26930; RP23-393I12.2; RP23-393I12.5	predicted gene 4258 [Source:MGI Symbol;Acc:MGI:3782435]; predicted gene, 26930; novel transcript	NonCoding	-3.08	1.97e-05	0.0317			T
TC0400001076.mm.1	3.25	T	Dab1	disabled 1; disabled 1 (Dab1), transcript variant 2, mRNA.	Multiple_Complex	-3.16	3.57e-06	0.0128			T
TC0800002783.mm.1	2.34	T	Cdh11	cadherin 11	Coding	-3.18	2.14e-05	0.0336			T
TC1500001021.mm.1	-1.36	T	Asic1	acid-sensing (proton-gated) ion channel 1	Multiple_Complex	-3.25	3.52e-05	0.0442	Alternative 3' Acceptor Site	0.24	T
TC0500003193.mm.1	2.2	T	Aldh2	aldehyde dehydrogenase 2, mitochondrial	Multiple_Complex	-3.29	4.23e-05	0.0489	Alternative 5' Donor Site	0.21	T
TC1700001105.mm.1	-3.72	T	Epb41l3	erythrocyte membrane protein band 4.1 like 3	Multiple_Complex	-3.36	3.75e-05	0.046	Cassette Exon	0.25	T
TC0800002310.mm.1	3.69	T	Cpe	carboxypeptidase E	Multiple_Complex	-3.37	1.48e-08	0.0007			T
TC0100000452.mm.1	3.7	T	Gm973	predicted gene 973	Coding	-3.53	3.4e-05	0.0432	Cassette Exon	0.22	T
TC0200001204.mm.1	3.38	T	Fam171b	family with sequence similarity 171, member B	Multiple_Complex	-3.63	7.85e-08	0.0016			T
TC0600002079.mm.1	4.81	T	Ptn	pleiotrophin	Multiple_Complex	-3.64	1.63e-05	0.0288	Alternative 3' Acceptor Site	0.23	T
TC1200001064.mm.1	-1.75	T	D430019H16Rik	RIKEN cDNA D430019H16 gene	Multiple_Complex	-3.66	1.14e-05	0.0227			T
TC1700002348.mm.1	-3.21	T	Tubb4a	tubulin, beta 4A class IVA	Coding	-3.72	2.19e-05	0.034	Cassette Exon	0.23	T
TC1900001722.mm.1	3.84	T	Gfra1	glial cell line derived neurotrophic factor family receptor alpha 1; glial cell line derived neurotrophic factor family receptor alpha 1 (Gfra1), mRNA.	Multiple_Complex	-3.78	6.49e-06	0.017	Alternative 3' Acceptor Site	0.24	T
TC0500002887.mm.1	2.92	T	Sparcl1	SPARC-like 1	Coding	-3.85	1.26e-05	0.0242	Alternative 3' Acceptor Site	0.25	T
TC0300000974.mm.1	5.97	T	Notch2	notch 2; Synthetic construct Mus musculus clone IMAGE:100069450, MGC:199352 Notch gene homolog 2 (Drosophila) (Notch2) mRNA, encodes complete protein.	Multiple_Complex	-4.01	1.12e-05	0.0224	Alternative 5' Donor Site	0.26	T
TC1200002506.mm.1	-1.14	T	Dnah11	dynein, axonemal, heavy chain 11	Multiple_Complex	-4.07	1.9e-05	0.0312	Cassette Exon	0.32	T
TC1100004164.mm.1	-1.55	T	Rbfox3	RNA binding protein, fox-1 homolog (C. elegans) 3	Multiple_Complex	-4.12	3.39e-05	0.0432	Cassette Exon	0.23	T
TC1200000622.mm.1	1.73	T	Lrrc9	leucine rich repeat containing 9	Multiple_Complex	-4.14	1.1e-05	0.0224			T
TC0900000829.mm.1	3.68	T	Igdcc4	immunoglobulin superfamily, DCC subclass, member 4; Synthetic construct Mus musculus clone IMAGE:100062874, MGC:190982 immunoglobulin superfamily, DCC subclass, member 4 (Igdcc4) mRNA, encodes complete protein.	Multiple_Complex	-4.2	5.67e-06	0.0157			T
TC0600000775.mm.1	2.96	T	Gng12	guanine nucleotide binding protein (G protein), gamma 12	Multiple_Complex	-4.22	1.45e-05	0.0269			T
TC0200001524.mm.1	5	T	Slc1a2	solute carrier family 1 (glial high affinity glutamate transporter), member 2	Multiple_Complex	-4.37	6.95e-06	0.0178			T
TC0800000796.mm.1	2.52	T	Slc27a1	solute carrier family 27 (fatty acid transporter), member 1	Coding	-4.43	7.69e-06	0.0186			T
TC1200001886.mm.1	4.77	T	Trim9	tripartite motif-containing 9	Multiple_Complex	-4.74	1.24e-05	0.0238			T
TC1300001638.mm.1	1.61	T	Hist1h2ac	histone cluster 1, H2ac	Multiple_Complex	-4.81	1.02e-06	0.007			T
TC0700000921.mm.1	5.98	T	Luzp2	leucine zipper protein 2	Multiple_Complex	-4.83	1.44e-05	0.0269			T
TC0500000361.mm.1	5.37	T	Fgfr3	fibroblast growth factor receptor 3	Multiple_Complex	-4.92	1.41e-05	0.0265	Intron Retention	0.45	T
TC1500001806.mm.1	-1.02	T	Gm3787	PREDICTED: predicted gene 3787 (Gm3787), mRNA.	Multiple_Complex	-4.97	1.13e-05	0.0225			T
TC0900002898.mm.1	-1.99	T	Clstn2	calsyntenin 2	Multiple_Complex	-5.03	2.63e-06	0.011	Cassette Exon	0.27	T
TC1100002180.mm.1	-2.22	T	Nacad	NAC alpha domain containing	Multiple_Complex	-5.09	1.11e-05	0.0224	Alternative 3' Acceptor Site	0.31	T
TC1100002515.mm.1	-1.71	T	Tenm2	teneurin transmembrane protein 2	Multiple_Complex	-5.32	1.05e-05	0.0219	Cassette Exon	0.29	T
TC1100003962.mm.1	-1.52	T	Cacng4	calcium channel, voltage-dependent, gamma subunit 4	Multiple_Complex	-5.33	5.65e-06	0.0157	Alternative 5' Donor Site	0.27	T
TC0300002543.mm.1	-1.8	T	Pde4dip; Mir7225	phosphodiesterase 4D interacting protein (myomegalin); microRNA 7225	Multiple_Complex	-5.5	3.93e-05	0.0471			T
TC0500001730.mm.1	-1.58	T	Grid2ip	glutamate receptor, ionotropic, delta 2 (Grid2) interacting protein 1	Multiple_Complex	-5.65	9.59e-07	0.007	Cassette Exon	0.36	T
TC0700003552.mm.1	6.21	T	Mfge8	milk fat globule-EGF factor 8 protein	Coding	-5.82	8.25e-06	0.0193	Intron Retention	0.37	T
TC0700001689.mm.1	4.48	T	Xylt1	xylosyltransferase 1; Synthetic construct Mus musculus clone IMAGE:100063303, MGC:191060 xylosyltransferase 1 (Xylt1) mRNA, encodes complete protein.	Multiple_Complex	-5.82	3.87e-08	0.0014	Cassette Exon	0.26	T
TC0100000039.mm.1	4.71	T	Adhfe1	alcohol dehydrogenase, iron containing, 1	Multiple_Complex	-5.97	2.66e-05	0.0376			T
TC0100003079.mm.1	-1.7	T	Cntn2	contactin 2	Multiple_Complex	-5.99	1.01e-05	0.0215			T
TC1800000179.mm.1	6.2	T	Dtna	dystrobrevin alpha; dystrobrevin alpha (Dtna), transcript variant 1, mRNA.	Multiple_Complex	-6.02	1.13e-07	0.002	Cassette Exon	0.25	T
TC0300001482.mm.1	7	T	Ddah1	dimethylarginine dimethylaminohydrolase 1	Multiple_Complex	-6.1	1.76e-05	0.0301	Cassette Exon	0.23	T
TC1500001657.mm.1	-1.26	T	Ndrg1	N-myc downstream regulated gene 1	Multiple_Complex	-6.17	9.48e-07	0.007	Cassette Exon	0.22	T
TC1700001822.mm.1	3.12	T	Cbs	cystathionine beta-synthase	Multiple_Complex	-6.17	6.59e-06	0.0172			T
TC0500002394.mm.1	4.65	T	Ppargc1a	peroxisome proliferative activated receptor, gamma, coactivator 1 alpha	Multiple_Complex	-6.21	5.38e-06	0.0155			T
TC0700000050.mm.1	1.12	T	Ssc5d	scavenger receptor cysteine rich family, 5 domains; scavenger receptor cysteine rich domain containing (5 domains)	Coding	-6.23	2.42e-05	0.0361			T
TC0700004119.mm.1	4.12	T	Dkk3	dickkopf homolog 3 (Xenopus laevis)	Coding	-6.44	2.58e-05	0.0371			T
TC1500001279.mm.1	-1.65	T	Basp1	brain abundant, membrane attached signal protein 1; Synthetic construct Mus musculus clone IMAGE:100064072, MGC:193443 brain abundant, membrane attached signal protein 1 (Basp1) mRNA, encodes complete protein.	Multiple_Complex	-6.73	1.34e-08	0.0007	Alternative 5' Donor Site	0.27	T
TC0200000955.mm.1	-2.94	T	Csrnp3	cysteine-serine-rich nuclear protein 3	Multiple_Complex	-6.82	1.82e-05	0.0307			T
TC0800001871.mm.1	-1.05	T	Vdac3	voltage-dependent anion channel 3	Coding	-6.85	5.61e-07	0.0052			T
TC0900000725.mm.1	-1.31	T	Stra6	stimulated by retinoic acid gene 6	Multiple_Complex	-6.87	1.57e-05	0.0282	Cassette Exon	0.25	T
TC0600001266.mm.1	15.11	T	Slc6a11	solute carrier family 6 (neurotransmitter transporter, GABA), member 11	Coding	-6.9	4.63e-07	0.0046	Cassette Exon	0.22	T
TC0200004713.mm.1	10.64	T	Jag1	jagged 1	Multiple_Complex	-7.12	1.45e-06	0.0085	Cassette Exon	0.23	T
TC0100000430.mm.1	-1.68	T	Aox4	aldehyde oxidase 4	Multiple_Complex	-7.3	3.29e-06	0.0123			T
TC0900000296.mm.1	-2.33	T	Ets1	E26 avian leukemia oncogene 1, 5 domain; E26 avian leukemia oncogene 1, 5' domain	Multiple_Complex	-7.75	8.51e-06	0.0198			T
TC0300002357.mm.1	-1.01	T	Il6ra	interleukin 6 receptor, alpha	Coding	-7.83	2.94e-06	0.0118			T
TC0200005041.mm.1	-3.33	T	Gm14204	predicted gene 14204	NonCoding	-7.95	1.22e-05	0.0237			T
TC1800001312.mm.1	4.34	T	Sema6a	sema domain, transmembrane domain (TM), and cytoplasmic domain, (semaphorin) 6A	Multiple_Complex	-8.77	1.1e-05	0.0224			T
TC1300000148.mm.1	-1.57	T	Elmo1	engulfment and cell motility 1; engulfment and cell motility 1 (Elmo1), transcript variant 2, non-coding RNA.	Multiple_Complex	-10.66	7.65e-06	0.0186			T
TC0800003082.mm.1	-1.45	T	C230057M02Rik	PREDICTED: RIKEN cDNA C230057M02 gene (C230057M02Rik), miscRNA.	NonCoding	-11.05	2.19e-06	0.01	Cassette Exon	0.2	T
TC0300000238.mm.1	-2.94	T	Sox2ot; Mir1897	SOX2 overlapping transcript (non-protein coding); microRNA 1897	Multiple_Complex	-11.89	1.89e-06	0.0097	Cassette Exon	0.22	T
TC1500002162.mm.1	1.15	T	Col2a1	collagen, type II, alpha 1	Multiple_Complex	-13.49	2.41e-06	0.0105			T
TC1100002126.mm.1	-1.21	T	Ewsr1	Ewing sarcoma breakpoint region 1; Ewing sarcoma breakpoint region 1 (Ewsr1), mRNA.	Multiple_Complex	-14.27	2.14e-05	0.0336			T
TC1500001956.mm.1	-1.01	T	Cyp2d41-ps	cytochrome P450, family 2, subfamily d, member 41, pseudogene	Multiple_Complex	-17.88	4.99e-10	0.0001			T
TC0500001144.mm.1	1.03	T	A630023P12Rik	RIKEN cDNA A630023P12 gene	NonCoding	-18.62	1e-06	0.007			T
TC0X00003428.mm.1	1.05	T	Xlr5c	X-linked lymphocyte-regulated 5C	Coding	-18.84	1.42e-06	0.0083			T
TC0700003126.mm.1	-1.12	T	C230091D08Rik	RIKEN cDNA C230091D08 gene; RIKEN cDNA C230091D08 gene (C230091D08Rik), non-coding RNA.	Multiple_Complex	-19.06	4.78e-06	0.015			T
TC1200000247.mm.1	-3.08	T	Myt1l	myelin transcription factor 1-like	Multiple_Complex	-19.49	2.02e-06	0.0098			T
TC0X00002464.mm.1	1.07	T	Xlr5e-ps	X-linked lymphocyte-regulated 5E, pseudogene	Pseudogene	-20.5	1.23e-06	0.0077			T
TC0900003338.mm.1	1.02	T	Dync2h1	dynein cytoplasmic 2 heavy chain 1	Multiple_Complex	-21.4	2.21e-05	0.0341			T
TC0X00000675.mm.1	1.11	T	Xlr5b	X-linked lymphocyte-regulated 5B	Coding	-21.66	1.3e-06	0.0079			T
TC0X00000722.mm.1	1.1	T	Xlr5d-ps	X-linked lymphocyte-regulated 5D, pseudogene	Pseudogene	-22.14	1.08e-06	0.0072			T
TC0X00003427.mm.1	1.03	T	Xlr5a	X-linked lymphocyte-regulated 5A	Coding	-23.06	1.25e-06	0.0077			T
TC0400001058.mm.1	-1.42	T	Sgip1	SH3-domain GRB2-like (endophilin) interacting protein 1; SH3-domain GRB2-like (endophilin) interacting protein 1 (Sgip1), mRNA.	Multiple_Complex	-23.68	4.77e-06	0.015			T
TC1300001902.mm.1	-1.11	T	Dtnbp1	dystrobrevin binding protein 1	Coding	-24.6	4.24e-06	0.0142			T
TC1400000946.mm.1	-3	T	Stmn4	stathmin-like 4	Multiple_Complex	-25.38	5.68e-07	0.0052			T
TC0700003129.mm.1	-1.15	T			NonCoding	-26.09	5.63e-06	0.0157			T
TC0200005500.mm.1	1.16	T	Alkbh3	alkB, alkylation repair homolog 3 (E. coli)	Multiple_Complex	-36	1.96e-05	0.0317			T
TC1900001649.mm.1	-1.95	T	Sorcs1	sortilin-related VPS10 domain containing receptor 1; VPS10 domain receptor protein SORCS 1	Coding	-85.24	3.85e-05	0.0469			T
TC0700002497.mm.1	3.27794	T	Dbn1	apolipoprotein E	Coding	PSR0700022032.mm.1	3.45323	1.64236e-05	0.0289777
TC0200003176.mm.1	1.22339	T	Slc8a1	nucleus accumbens associated 2, BEN and BTB (POZ) domain containing	Multiple_Complex	N/A	N/A	N/A	N/A	N/A	N/A
TC1100002180.mm.1	-2.22127	T	Nacad	NAC alpha domain containing	Multiple_Complex	PSR1100021243.mm.1	-5.0943	1.10702e-05	0.022386	Alternative 3' Acceptor Site	0.314235
TC0400000855.mm.1	-1.61082	T	Tmem41a	SH3-domain GRB2-like 2	Coding	N/A	N/A	N/A	N/A	N/A	N/A
TC1100002180.mm.1	-2.22127	T	Nacad	NAC alpha domain containing	Multiple_Complex	PSR1100021235.mm.1	-5.35959	3.88958e-05	0.0470399	Cassette Exon	0.237262
TC1600000571.mm.1	2.66254	T	Acap3	limbic system-associated membrane protein; Synthetic construct Mus musculus clone IMAGE:100016504, MGC:184562 limbic system-associated membrane protein (Lsamp) mRNA, encodes complete protein.	Multiple_Complex	N/A	N/A	N/A	N/A	N/A	N/A
TC0200001377.mm.1	4.42497	T	Nav1	low density lipoprotein receptor-related protein 4	Multiple_Complex	PSR0200010720.mm.1	4.88277	2.93296e-05	0.0393693	Cassette Exon	0.240931
TC0300002797.mm.1	4.03009	T	Snap25	sphingosine-1-phosphate receptor 1	Coding	PSR0300022008.mm.1	3.40886	4.07681e-07	0.00430366
TC0900001892.mm.1	-3.98747	T	Dlg3	ELAV (embryonic lethal, abnormal vision, Drosophila)-like 3 (Hu antigen C)	Multiple_Complex	N/A	N/A	N/A	N/A	N/A	N/A
TC1500002243.mm.1	-2.87348	T	Gng2	POU domain, class 6, transcription factor 1	Multiple_Complex	PSR1500018424.mm.1	3.39958	2.14408e-05	0.0336372
TC0500001466.mm.1	2.49097	T	Snf8	transmembrane protein 132B	Multiple_Complex	N/A	N/A	N/A	N/A	N/A	N/A
TC0900002322.mm.1	2.09722	T	Mtcl1	acyl-CoA synthetase bubblegum family member 1; PREDICTED: predicted gene 2069 (Gm2069), miscRNA.	Multiple_Complex	PSR0900019469.mm.1	3.37313	7.689e-06	0.018628
TC0500001466.mm.1	2.49097	T	Nav1	transmembrane protein 132B	Multiple_Complex	PSR0500013289.mm.1	4.85458	1.87853e-05	0.0310346	Cassette Exon	0.250485
TC0100001698.mm.1	-1.2123	T	Dnajc8	consortin, connexin sorting protein	Multiple_Complex	N/A	N/A	N/A	N/A	N/A	N/A
TC0700000412.mm.1	-2.001	T	Nudt21	transmembrane protein 145	Multiple_Complex	JUC0700001565.mm.1	3.30383	5.67803e-07	0.00520353
TC1400002180.mm.1	16.2997	T	Gm11491	tumor necrosis factor receptor superfamily, member 19	Coding	N/A	N/A	N/A	N/A	N/A	N/A
TC0200003118.mm.1	-2.43726	T	Mtcl1	calcium channel, voltage-dependent, N type, alpha 1B subunit	Multiple_Complex	JUC0200012930.mm.1	3.29363	2.20769e-05	0.0340582
TC1300002747.mm.1	1.79895	T	Nav3	NIM1 serine/threonine protein kinase	Multiple_Complex	PSR1300018579.mm.1	7.3638	1.96718e-08	0.000765763	Cassette Exon	0.252414
TC1400001288.mm.1	2.78814	T	Gm9758	claudin 10	Coding	PSR1400009705.mm.1	3.27369	1.08993e-05	0.022386
TC0X00001931.mm.1	-2.38277	T	Dcaf12	synapsin I	Coding	PSR0X00012258.mm.1	3.27353	2.10177e-05	0.0333941
TC0500000819.mm.1	1.56205	T	Gm16105	solute carrier family 4 (anion exchanger), member 4; Synthetic construct Mus musculus clone IMAGE:100068154, MGC:195771 solute carrier family 4 (anion exchanger), member 4 (Slc4a4) mRNA, encodes complete protein.	Multiple_Complex	N/A	N/A	N/A	N/A	N/A	N/A
TC0800002577.mm.1	-3.24861	T	Gm16234	zinc finger SWIM-type containing 4	Multiple_Complex	PSR0800019647.mm.1	3.27306	2.21744e-05	0.0341011
TC1000000193.mm.1	4.80281	T	Ptprz1	vanin 1	Coding	N/A	N/A	N/A	N/A	N/A	N/A
TC1900001729.mm.1	-11.8572	T	Nav3	shootin 1	Multiple_Complex	PSR1900015315.mm.1	-5.55528	7.0747e-06	0.0177675	Cassette Exon	0.35548
TC1100002512.mm.1	2.22179	T	BC021767	WW, C2 and coiled-coil domain containing 1	Multiple_Complex	PSR1100023406.mm.1	3.24029	3.86166e-05	0.0468842
TC0200002437.mm.1	-5.70734	T	Rtn1	solute carrier family 32 (GABA vesicular transporter), member 1	Coding	N/A	N/A	N/A	N/A	N/A	N/A
TC1400001599.mm.1	2.11556	T	Gart	zinc finger, CCHC domain containing 24	Multiple_Complex	PSR1400012042.mm.1	3.23995	1.84315e-05	0.0308293
TC1600001319.mm.1	-2.27349	T	Map3k13	glycoprotein Ib, beta polypeptide; septin 5	Coding	N/A	N/A	N/A	N/A	N/A	N/A
TC1500001657.mm.1	-1.26018	T	Ndrg1	N-myc downstream regulated gene 1	Multiple_Complex	PSR1500012446.mm.1	-6.16589	9.48076e-07	0.0070107	Cassette Exon	0.223218
TC1800001139.mm.1	-2.15051	T	Aox4	neuronal regeneration related protein	Multiple_Complex	PSR1800008307.mm.1	3.23531	2.04335e-05	0.0326323
TC0400001024.mm.1	2.21755	T	Cmtm5	ribonucleoprotein, PTB-binding 2	Multiple_Complex	N/A	N/A	N/A	N/A	N/A	N/A
TC1600001371.mm.1	-1.62867	T	5930403L14Rik	predicted gene, 26744 [Source:MGI Symbol;Acc:MGI:5477238]	NonCoding	PSR1600011343.mm.1	3.23246	5.62854e-06	0.0156984
TC0500001860.mm.1	-2.726	T	Inppl1	furry homolog (Drosophila)	Multiple_Complex	N/A	N/A	N/A	N/A	N/A	N/A
TC0500001443.mm.1	-1.21301	T	Igdcc4	SET domain containing (lysine methyltransferase) 8	Multiple_Complex	JUC0500007080.mm.1	3.21449	2.20919e-05	0.0340582
TC1300000718.mm.1	3.60976	T	Nkd1	neurotrophic tyrosine kinase, receptor, type 2; neurotrophic tyrosine kinase, receptor, type 2 (Ntrk2), transcript variant 1, mRNA.	Multiple_Complex	PSR1300004728.mm.1	3.21099	2.56956e-05	0.0370533
TC1100003567.mm.1	2.5791	T	Sppl2b	acyl-CoA synthetase family member 2	Multiple_Complex	N/A	N/A	N/A	N/A	N/A	N/A
TC1600000335.mm.1	-3.00061	T	Dpysl2	beta galactoside alpha 2,6 sialyltransferase 1	Multiple_Complex	PSR1600003374.mm.1	3.20937	1.87246e-06	0.00970256
TC0900002388.mm.1	-2.65363	T	Cd63	immunoglobulin superfamily containing leucine-rich repeat 2	Coding	PSR0900020064.mm.1	3.18884	1.45253e-05	0.026912
TC1300000735.mm.1	-1.74478	T	Gm11744	death associated protein kinase 1; death associated protein kinase 1 (Dapk1), transcript variant 1, mRNA.	Multiple_Complex	N/A	N/A	N/A	N/A	N/A	N/A
TC0600002861.mm.1	-1.43579	T	Etv5	PDZ domain containing RING finger 3	Multiple_Complex	PSR0600022023.mm.1	3.18417	3.59076e-05	0.0446976
TC1400001078.mm.1	-3.49233	T	Pvrl3	ecto-NOX disulfide-thiol exchanger 1	Multiple_Complex	N/A	N/A	N/A	N/A	N/A	N/A
TC1500001977.mm.1	-2.80669	T	Atp2b2	tubulin tyrosine ligase-like 1	Multiple_Complex	PSR1500015601.mm.1	3.18388	4.25756e-05	0.0491974
TC0600000281.mm.1	-2.3727	T	Notum		NonCoding	N/A	N/A	N/A	N/A	N/A	N/A
TC0600000281.mm.1	-2.3727	T	Wscd1		NonCoding	PSR0600002047.mm.1	4.30901	3.61427e-05	0.044753	Cassette Exon	0.250646
TC1100004067.mm.1	-1.38753	T	Celf5	HID1 domain containing	Multiple_Complex	N/A	N/A	N/A	N/A	N/A	N/A
TC0700000941.mm.1	-3.58446	T	Cdh4	gamma-aminobutyric acid (GABA) A receptor, subunit beta 3; Synthetic construct Mus musculus clone IMAGE:100016561, MGC:184489 gamma-aminobutyric acid (GABA-A) receptor, subunit beta 3 (Gabrb3) mRNA, encodes complete protein.	Multiple_Complex	PSR0700008660.mm.1	3.17625	3.65467e-05	0.0451636
TC0700003464.mm.1	-2.83261	T	Tcf7l2	arrestin domain containing 4	Multiple_Complex	PSR0700029493.mm.1	3.1483	2.05911e-06	0.00975118
TC1300002392.mm.1	-4.0249	T	Trp53i11	versican	Multiple_Complex	N/A	N/A	N/A	N/A	N/A	N/A
TC0700000023.mm.1	4.06591	T	Neb	tweety homolog 1 (Drosophila)	Multiple_Complex	PSR0700000306.mm.1	-3.80104	4.64073e-06	0.0147682	Alternative 3' Acceptor Site	0.324303
TC1500001734.mm.1	1.09517	T	Glce	PREDICTED: predicted gene 3142 (Gm3142), mRNA.	Coding	N/A	N/A	N/A	N/A	N/A	N/A
TC0100000808.mm.1	2.89778	T	Bmpr1b	protease, serine 56	Multiple_Complex	PSR0100006759.mm.1	3.12506	4.19289e-05	0.0488124
TC1200000951.mm.1	-5.1049	T	Wwc1	fibronectin leucine rich transmembrane protein 2	Multiple_Complex	N/A	N/A	N/A	N/A	N/A	N/A
TC0700002695.mm.1	-1.65925	T	Prdm16	pleckstrin homology domain containing, family G (with RhoGef domain) member 2	Multiple_Complex	PSR0700023601.mm.1	3.12285	6.27473e-06	0.0167947
TC0600000014.mm.1	-5.27848	T	S1pr1	paternally expressed 10; Synthetic construct Mus musculus clone IMAGE:100062263, MGC:190439 paternally expressed 10 (Peg10) mRNA, encodes complete protein.	Coding	N/A	N/A	N/A	N/A	N/A	N/A
TC0400004120.mm.1	3.47496	T	Trim46	RIKEN cDNA 5930403L14 gene; RIKEN cDNA 5930403L14 gene (5930403L14Rik), non-coding RNA.	Multiple_Complex	PSR0400034456.mm.1	3.11937	3.76518e-05	0.0460721
TC0300002802.mm.1	2.39091	T	Fgfr2	vascular cell adhesion molecule 1	Coding	N/A	N/A	N/A	N/A	N/A	N/A
TC1100004224.mm.1	2.65369	T	Gm4258	notum pectinacetylesterase homolog (Drosophila)	Multiple_Complex	PSR1100040408.mm.1	3.10149	1.72167e-05	0.0296292
TC1300002629.mm.1	-3.77521	T	Notum	zinc finger SWIM-type containing 6	Multiple_Complex	N/A	N/A	N/A	N/A	N/A	N/A
TC0200001071.mm.1	-2.76409	T	Cdh4	trans-acting transcription factor 9	Multiple_Complex	PSR0200008707.mm.1	3.06034	5.97811e-07	0.00539617
TC1000000402.mm.1	-14.6914	T	Dab1	CD24a antigen	Coding	N/A	N/A	N/A	N/A	N/A	N/A
TC0300002277.mm.1	-2.83243	T	Cdh11	CD1d1 antigen	Multiple_Complex	PSR0300017105.mm.1	3.05929	1.23202e-06	0.00767341
TC0100003129.mm.1	-3.52797	T	Mpped2	neuron navigator 1	Multiple_Complex	N/A	N/A	N/A	N/A	N/A	N/A
TC0100003338.mm.1	-3.28118	T	Asic1	bone morphogenic protein/retinoic acid inducible neural-specific 2	Multiple_Complex	PSR0100027337.mm.1	3.03478	2.82026e-05	0.0383525
TC1400000780.mm.1	1.03892	T	Gad1	copine VI	Multiple_Complex	JUC1400003276.mm.1	3.03172	1.63534e-06	0.00893455
TC1100001624.mm.1	3.4898	T	Aldh2	FK506 binding protein 10	Multiple_Complex	N/A	N/A	N/A	N/A	N/A	N/A
TC1300002426.mm.1	2.44798	T	Dab1	thrombospondin 4	Multiple_Complex	PSR1300016173.mm.1	3.02363	4.16292e-05	0.0485543
TC0400001034.mm.1	2.02488	T	Epb41l3	adenylate kinase 4	Multiple_Complex	N/A	N/A	N/A	N/A	N/A	N/A
TC0600002553.mm.1	-1.17737	T	Cpe	sema domain, immunoglobulin domain (Ig), TM domain, and short cytoplasmic domain (Sema4f), transcript variant 2, mRNA.; sema domain, immunoglobulin domain (Ig), TM domain, and short cytoplasmic domain	Multiple_Complex	JUC0600010272.mm.1	3.02109	2.24986e-05	0.0344295
TC0600002560.mm.1	-2.43565	T	Fry	WW domain binding protein 1	Multiple_Complex	N/A	N/A	N/A	N/A	N/A	N/A
TC1200002411.mm.1	2.1051	T	Cdh4	creatine kinase, brain	Multiple_Complex	JUC1200009221.mm.1	2.96975	2.67714e-05	0.0375713
TC0100003566.mm.1	10.5721	T	Axl	ATPase, Na+/K+ transporting, alpha 2 polypeptide	Multiple_Complex	N/A	N/A	N/A	N/A	N/A	N/A
TC0300003246.mm.1	1.33346	T	Neb	glutathione S-transferase, mu 3	Coding	PSR0300021295.mm.1	2.94704	1.44439e-05	0.026912
TC1400002180.mm.1	16.2997	T	Gm973	tumor necrosis factor receptor superfamily, member 19	Coding	PSR1400016882.mm.1	2.90945	8.62005e-06	0.0198792
TC0300000871.mm.1	-5.35332	T	Nim1k	CUGBP, Elav-like family member 3; CUGBP, Elav-like family member 3 (Celf3), mRNA.	Multiple_Complex	PSR0300006661.mm.1	5.73846	5.32215e-06	0.0154177	Alternative 3' Acceptor Site	0.261121
TC0100003409.mm.1	2.45311	T	Fam171b	paired related homeobox 1	Multiple_Complex	N/A	N/A	N/A	N/A	N/A	N/A
TC0700002497.mm.1	3.27794	T	Ptn	apolipoprotein E	Coding	PSR0700022033.mm.1	2.87743	2.33513e-06	0.0102855
TC1500002243.mm.1	-2.87348	T	D430019H16Rik	POU domain, class 6, transcription factor 1	Multiple_Complex	N/A	N/A	N/A	N/A	N/A	N/A
TC0400002587.mm.1	-4.22382	T	Ina	insulin-like growth factor binding protein-like 1	Multiple_Complex	PSR0400021075.mm.1	2.84345	4.71543e-06	0.0149082
TC0200002411.mm.1	-2.73875	T	Mpped2	neuronatin	Multiple_Complex	PSR0200019547.mm.1	2.82421	5.24936e-06	0.0154138
TC0300002035.mm.1	-3.1359	T	Tubb4a	profilin 2	Coding	N/A	N/A	N/A	N/A	N/A	N/A
TC0300000974.mm.1	5.97098	T	Notch2	notch 2; Synthetic construct Mus musculus clone IMAGE:100069450, MGC:199352 Notch gene homolog 2 (Drosophila) (Notch2) mRNA, encodes complete protein.	Multiple_Complex	PSR0300007877.mm.1	-4.00708	1.11516e-05	0.0224392	Alternative 5' Donor Site	0.262878
TC0400000381.mm.1	1.26205	T	Tspan18	interleukin 11 receptor, alpha chain 1	Multiple_Complex	PSR0400002388.mm.1	2.78024	9.95026e-06	0.0214441
TC1200001885.mm.1	1.61857	T	Fam171b	liver glycogen phosphorylase	Multiple_Complex	PSR1200012915.mm.1	2.77802	3.96855e-05	0.0474422
TC0900001455.mm.1	5.2454	T	Gfra1	chondroitin sulfate proteoglycan 5	Multiple_Complex	PSR0900012108.mm.1	2.75952	8.85021e-06	0.0199119
TC1000001090.mm.1	-2.05802	T	Neb	ankyrin repeat and sterile alpha motif domain containing 1B	Multiple_Complex	N/A	N/A	N/A	N/A	N/A	N/A
TC0X00003287.mm.1	-2.52137	T	Sparcl1	Nance-Horan syndrome (human)	Multiple_Complex	PSR0X00020555.mm.1	2.7374	3.17826e-05	0.041939
TC1300002279.mm.1	-3.39841	T	Gfra1	ubiquitin-conjugating enzyme E2Q family-like 1	Multiple_Complex	PSR1300014900.mm.1	2.73298	3.69146e-06	0.013138
TC1000002239.mm.1	-1.48067	T	Notch2	sphingosine phosphate lyase 1	Multiple_Complex	PSR1000015768.mm.1	2.72132	3.43215e-05	0.0432723
TC0100001581.mm.1	-1.94585	T	Pvrl3	a disintegrin-like and metallopeptidase (reprolysin type) with thrombospondin type 1 motif, 4	Coding	JUC0100007368.mm.1	2.71669	3.37015e-06	0.0123473
TC1100001550.mm.1	-1.35396	T	Dnah11	LIM and SH3 protein 1	Multiple_Complex	JUC1100007436.mm.1	2.68629	2.6988e-05	0.037604
TC1000001090.mm.1	-2.05802	T	Tspan18	ankyrin repeat and sterile alpha motif domain containing 1B	Multiple_Complex	PSR1000008302.mm.1	2.67889	9.73196e-07	0.0070107
TC0100001201.mm.1	-2.21658	T	Rbfox3	phosphoinositide-3-kinase, class 2, beta polypeptide	Multiple_Complex	PSR0100009769.mm.1	2.65915	1.7221e-05	0.0296292
TC0100002413.mm.1	-1.88196	T	Lrrc9	Ras association (RalGDS/AF-6) and pleckstrin homology domains 1	Multiple_Complex	PSR0100019782.mm.1	2.61776	2.73156e-05	0.0377572
TC0900003040.mm.1	9.75538	T	Igdcc4	solute carrier family 38, member 3	Multiple_Complex	PSR0900025403.mm.1	2.60846	3.93284e-05	0.0471176
TC0100002308.mm.1	-1.84953	T	Gng12	myosin IB	Multiple_Complex	N/A	N/A	N/A	N/A	N/A	N/A
TC0200000302.mm.1	-2.1395	T	Bmpr1b	Bmi1 polycomb ring finger oncogene	Multiple_Complex	PSR0200001360.mm.1	2.59938	1.79773e-05	0.0305091
TC0500001756.mm.1	2.54454	T	Inppl1	neuronal pentraxin 2	Coding	N/A	N/A	N/A	N/A	N/A	N/A
TC1300000908.mm.1	-2.27332	T	Slc1a2	proprotein convertase subtilisin/kexin type 1	Multiple_Complex	PSR1300005892.mm.1	2.57677	1.00602e-05	0.0214572
TC0100000404.mm.1	-3.00499	T	Clstn2	phospholipase C-like 1	Coding	N/A	N/A	N/A	N/A	N/A	N/A
TC1800000105.mm.1	-4.09022	T	Slc27a1	tetratricopeptide repeat domain 39C	Multiple_Complex	PSR1800000794.mm.1	2.57346	1.09219e-05	0.022386
TC1700000835.mm.1	1.81188	T	Prdm16	phospholipase A2, group VII (platelet-activating factor acetylhydrolase, plasma)	Multiple_Complex	N/A	N/A	N/A	N/A	N/A	N/A
TC0700002644.mm.1	3.36834	T	Sh3gl2	AXL receptor tyrosine kinase	Multiple_Complex	PSR0700022891.mm.1	2.57262	2.6934e-05	0.037604
TC1500000982.mm.1	-3.27886	T	Sema7a	calcium channel, voltage-dependent, beta 3 subunit; Synthetic construct Mus musculus clone IMAGE:100063891, MGC:193358 calcium channel, voltage-dependent, beta 3 subunit (Cacnb3) mRNA, encodes complete protein.; calcium channel, voltage-dependent, beta 3 subunit (Cacnb3), transcript variant 2, mRNA.; calcium channel, voltage-dependent, beta 3 subunit (Cacnb3), transcript variant 1, mRNA.	Coding	N/A	N/A	N/A	N/A	N/A	N/A
TC1700000754.mm.1	-1.85189	T	Lrp4	gamma-aminobutyric acid (GABA) B receptor, 1	Multiple_Complex	PSR1700007631.mm.1	2.56807	3.99388e-05	0.0475171
TC1100000294.mm.1	-3.68689	T	Igdcc4	coiled coil domain containing 88A; coiled coil domain containing 88A (Ccdc88a), mRNA.	Multiple_Complex	PSR1100002411.mm.1	2.54378	3.40952e-05	0.0431617
TC0500001628.mm.1	-1.85677	T	Trim9	actin-like 6B	Multiple_Complex	N/A	N/A	N/A	N/A	N/A	N/A
TC0200003118.mm.1	-2.43726	T	Hist1h2ac	calcium channel, voltage-dependent, N type, alpha 1B subunit	Multiple_Complex	PSR0200025582.mm.1	2.54017	2.63959e-05	0.0375713
TC1100002003.mm.1	2.16588	T	Luzp2	ring finger protein 213	Multiple_Complex	N/A	N/A	N/A	N/A	N/A	N/A
TC0X00003287.mm.1	-2.52137	T	Fry	Nance-Horan syndrome (human)	Multiple_Complex	PSR0X00020554.mm.1	2.53353	5.16932e-06	0.0154138
TC0500000422.mm.1	-4.83361	T	Fgfr3	collapsin response mediator protein 1; collapsin response mediator protein 1 (Crmp1), transcript variant 1, mRNA.	Multiple_Complex	PSR0500004201.mm.1	2.53178	4.09073e-05	0.0482017
TC0300003246.mm.1	1.33346	T	Gm3787	glutathione S-transferase, mu 3	Coding	N/A	N/A	N/A	N/A	N/A	N/A
TC1500001872.mm.1	-1.90611	T	Clstn2	casein kinase 1, epsilon	Multiple_Complex	PSR1500014676.mm.1	2.52263	2.01861e-05	0.0323582
TC0700002763.mm.1	-2.47168	T	Nacad	Rho GTPase activating protein 33; Rho GTPase activating protein 33 (Arhgap33), mRNA.	Coding	PSR0700024556.mm.1	2.51082	5.05935e-06	0.0154138
TC0600000145.mm.1	1.07197	T	Mpped2	cystic fibrosis transmembrane conductance regulator	Multiple_Complex	N/A	N/A	N/A	N/A	N/A	N/A
TC1000000131.mm.1	-2.91471	T	Plekha6	NHS-like 1	Multiple_Complex	PSR1000000888.mm.1	2.50341	9.12637e-06	0.0202754
TC1300001171.mm.1	-1.19745	T	Mpped2	centromere protein K; Synthetic construct Mus musculus clone IMAGE:100015025, MGC:180340 centromere protein K (Cenpk) mRNA, encodes complete protein.; centromere protein K (Cenpk), transcript variant 2, mRNA.; centromere protein K (Cenpk), transcript variant 1, mRNA.	Multiple_Complex	N/A	N/A	N/A	N/A	N/A	N/A
TC0600003539.mm.1	-1.85799	T	Fgfr3	RIKEN cDNA D630045J12 gene	Multiple_Complex	PSR0600016537.mm.1	2.4892	1.46033e-05	0.026912
TC0300002736.mm.1	1.45551	T	Tenm2	synaptophysin-like 2	Coding	N/A	N/A	N/A	N/A	N/A	N/A
TC1900001729.mm.1	-11.8572	T	Nptx2	shootin 1	Multiple_Complex	PSR1900015324.mm.1	6.58974	1.32819e-05	0.0252207	Alternative 3' Acceptor Site	0.225978
TC0700003512.mm.1	-5.91512	T	Nacad	ST8 alpha-N-acetyl-neuraminide alpha-2,8-sialyltransferase 2	Coding	N/A	N/A	N/A	N/A	N/A	N/A
TC1500000002.mm.1	2.14642	T	Fgfr3	selenoprotein P, plasma, 1	Multiple_Complex	JUC1500000007.mm.1	2.462	2.49873e-05	0.0366565
TC0X00003437.mm.1	1.05273	T	Celf5	interleukin 2 receptor, gamma chain	Multiple_Complex	N/A	N/A	N/A	N/A	N/A	N/A
TC0900002956.mm.1	2.08529	T	Acsf2	Eph receptor B1	Multiple_Complex	PSR0900024296.mm.1	2.45176	5.60732e-06	0.0156984
TC0800000013.mm.1	-2.59599	T	Pde4dip	calmodulin regulated spectrin-associated protein family, member 3	Coding	N/A	N/A	N/A	N/A	N/A	N/A
TC0100001606.mm.1	-1.71674	T	Fgfr3	peroxisomal biogenesis factor 19	Multiple_Complex	JUC0100007534.mm.1	2.45172	4.45082e-06	0.0145137
TC0900002322.mm.1	2.09722	T	Nav3	acyl-CoA synthetase bubblegum family member 1; PREDICTED: predicted gene 2069 (Gm2069), miscRNA.	Multiple_Complex	N/A	N/A	N/A	N/A	N/A	N/A
TC0900002105.mm.1	1.09413	T	Grid2ip	cytotoxic and regulatory T cell molecule; cytotoxic and regulatory T cell molecule (Crtam), mRNA.	Coding	PSR0900017387.mm.1	2.4513	7.71639e-06	0.018628
TC0700000412.mm.1	-2.001	T	Tspan18	transmembrane protein 145	Multiple_Complex	N/A	N/A	N/A	N/A	N/A	N/A
TC1600001319.mm.1	-2.27349	T	Mfge8	glycoprotein Ib, beta polypeptide; septin 5	Coding	PSR1600010873.mm.1	2.44678	2.66797e-05	0.0375713
TC0200003118.mm.1	-2.43726	T	Xylt1	calcium channel, voltage-dependent, N type, alpha 1B subunit	Multiple_Complex	N/A	N/A	N/A	N/A	N/A	N/A
TC1300000718.mm.1	3.60976	T	Adhfe1	neurotrophic tyrosine kinase, receptor, type 2; neurotrophic tyrosine kinase, receptor, type 2 (Ntrk2), transcript variant 1, mRNA.	Multiple_Complex	PSR1300004732.mm.1	2.44254	4.21574e-05	0.0489009
TC0800001522.mm.1	-8.45359	T	Ntng2	tubulin, beta 3 class III	Coding	PSR0800012490.mm.1	8.71365	1.16172e-06	0.00749094	Alternative 3' Acceptor Site	0.213488
TC0X00001931.mm.1	-2.38277	T	Dtna	synapsin I	Coding	N/A	N/A	N/A	N/A	N/A	N/A
TC1500001830.mm.1	1.05958	T	Notch2	testis expressed 33	Coding	JUC1500008161.mm.1	2.42326	4.12062e-05	0.0482377
TC0800002577.mm.1	-3.24861	T	Ddah1	zinc finger SWIM-type containing 4	Multiple_Complex	N/A	N/A	N/A	N/A	N/A	N/A
TC1700000572.mm.1	-1.14249	T	Ndrg1	zinc finger protein 952	Multiple_Complex	JUC1700002877.mm.1	2.41903	1.83301e-05	0.0308293
TC1100002512.mm.1	2.22179	T	Cbs	WW, C2 and coiled-coil domain containing 1	Multiple_Complex	N/A	N/A	N/A	N/A	N/A	N/A
TC0700000296.mm.1	-1.78538	T	Ppargc1a	reticulon 2 (Z-band associated protein); reticulon 2 (Z-band associated protein) (Rtn2), transcript variant B, mRNA.	Coding	PSR0700002259.mm.1	2.41006	2.76965e-06	0.0113341
TC1400001599.mm.1	2.11556	T	Ssc5d	zinc finger, CCHC domain containing 24	Multiple_Complex	N/A	N/A	N/A	N/A	N/A	N/A
TC0100001201.mm.1	-2.21658	T	Adhfe1	phosphoinositide-3-kinase, class 2, beta polypeptide	Multiple_Complex	PSR0100009770.mm.1	2.38981	2.74485e-05	0.0378225
TC0500003000.mm.1	-1.89601	T	Dtna	unc-51 like kinase 1	Multiple_Complex	PSR0500026636.mm.1	2.38344	3.79881e-05	0.0463016
TC1800001139.mm.1	-2.15051	T	Lrp4	neuronal regeneration related protein	Multiple_Complex	N/A	N/A	N/A	N/A	N/A	N/A
TC0500001860.mm.1	-2.726	T	Dkk3	furry homolog (Drosophila)	Multiple_Complex	PSR0500017106.mm.1	2.38008	2.99341e-05	0.0400084
TC0700001896.mm.1	-1.08664	T	Cntn2	phospholipid phosphatase 4	Coding	JUC0700008702.mm.1	2.37498	3.53078e-05	0.0442471
TC1300002679.mm.1	-1.00527	T	Basp1	interleukin 31 receptor A	Coding	PSR1300018109.mm.1	2.35629	8.98644e-08	0.00163218
TC1600001371.mm.1	-1.62867	T	Glul	predicted gene, 26744 [Source:MGI Symbol;Acc:MGI:5477238]	NonCoding	N/A	N/A	N/A	N/A	N/A	N/A
TC1300002059.mm.1	-2.35884	T	Csrnp3	drebrin 1	Multiple_Complex	PSR1300013010.mm.1	2.34266	2.26583e-05	0.034589
TC0500001443.mm.1	-1.21301	T	Vdac3	SET domain containing (lysine methyltransferase) 8	Multiple_Complex	N/A	N/A	N/A	N/A	N/A	N/A
TC1700002597.mm.1	-3.08876	T	Stra6	solute carrier family 8 (sodium/calcium exchanger), member 1; solute carrier family 8 (sodium/calcium exchanger), member 1 (Slc8a1), transcript variant B, mRNA.	Multiple_Complex	PSR1700023793.mm.1	2.30854	3.0357e-06	0.0119271
TC1600000335.mm.1	-3.00061	T	Acsf2	beta galactoside alpha 2,6 sialyltransferase 1	Multiple_Complex	N/A	N/A	N/A	N/A	N/A	N/A
TC0300002938.mm.1	-2.26424	T	Slc6a11	coiled-coil domain containing 109B	Coding	PSR0300023261.mm.1	2.30287	3.27258e-05	0.0427076
TC0900002388.mm.1	-2.65363	T	Trim9	immunoglobulin superfamily containing leucine-rich repeat 2	Coding	N/A	N/A	N/A	N/A	N/A	N/A
TC1600001373.mm.1	-1.25691	T	Dtna	transmembrane protein 41a	Multiple_Complex	PSR1600011352.mm.1	2.25069	5.00058e-06	0.0154138
TC0X00002770.mm.1	1.03477	T	Notch2	RIKEN cDNA 4930519F16 gene	Multiple_Complex	PSR0X00017474.mm.1	2.20833	2.55237e-05	0.0370533
TC0400002098.mm.1	-1.72866	T	Slc27a1	ArfGAP with coiled-coil, ankyrin repeat and PH domains 3	Multiple_Complex	PSR0400017587.mm.1	2.18199	8.91704e-06	0.0199777
TC1100001687.mm.1	-2.66672	T	Jag1	RUN domain containing 3A	Multiple_Complex	PSR1100015863.mm.1	2.14242	1.09535e-05	0.022386
TC0600002861.mm.1	-1.43579	T	Aox4	PDZ domain containing RING finger 3	Multiple_Complex	N/A	N/A	N/A	N/A	N/A	N/A
TC0200002077.mm.1	-2.5616	T	Ddah1	synaptosomal-associated protein 25	Multiple_Complex	PSR0200016534.mm.1	2.12521	1.94119e-05	0.03165
TC1500001977.mm.1	-2.80669	T	Vdac3	tubulin tyrosine ligase-like 1	Multiple_Complex	N/A	N/A	N/A	N/A	N/A	N/A
TC0X00000963.mm.1	-1.53728	T	Ets1	discs, large homolog 3 (Drosophila)	Multiple_Complex	PSR0X00006289.mm.1	2.0976	8.00271e-06	0.0188801
TC0700000941.mm.1	-3.58446	T	Map3k13	gamma-aminobutyric acid (GABA) A receptor, subunit beta 3; Synthetic construct Mus musculus clone IMAGE:100016561, MGC:184489 gamma-aminobutyric acid (GABA-A) receptor, subunit beta 3 (Gabrb3) mRNA, encodes complete protein.	Multiple_Complex	N/A	N/A	N/A	N/A	N/A	N/A
TC0300000892.mm.1	-1.62011	T	Il6ra	sema domain, transmembrane domain (TM), and cytoplasmic domain, (semaphorin) 6C; Synthetic construct Mus musculus clone IMAGE:100063292, MGC:191056 sema domain, transmembrane domain (TM), and cytoplasmic domain, (semaphorin) 6C (Sema6c) mRNA, encodes complete protein.; sema domain, transmembrane domain (TM), and cytoplasmic domain, (semaphorin) 6C (Sema6c), mRNA.	Multiple_Complex	PSR0300006928.mm.1	2.08334	1.77981e-05	0.0302874
TC0700003464.mm.1	-2.83261	T	Gm14204	arrestin domain containing 4	Multiple_Complex	N/A	N/A	N/A	N/A	N/A	N/A
TC1100001482.mm.1	-1.15816	T	Abca1	SNF8, ESCRT-II complex subunit, homolog (S. cerevisiae)	Multiple_Complex	PSR1100013739.mm.1	2.0763	3.25055e-06	0.012196
TC0700002695.mm.1	-1.65925	T	Sema6a	pleckstrin homology domain containing, family G (with RhoGef domain) member 2	Multiple_Complex	N/A	N/A	N/A	N/A	N/A	N/A
TC1700002431.mm.1	-1.42561	T	Slc6a11	microtubule crosslinking factor 1	Multiple_Complex	PSR1700022529.mm.1	2.07341	2.05513e-05	0.0327365
TC0400004120.mm.1	3.47496	T	Jag1	RIKEN cDNA 5930403L14 gene; RIKEN cDNA 5930403L14 gene (5930403L14Rik), non-coding RNA.	Multiple_Complex	N/A	N/A	N/A	N/A	N/A	N/A
TC0100001387.mm.1	2.38671	T	Slc13a3	glutamate-ammonia ligase (glutamine synthetase); microRNA 8114	Multiple_Complex	JUC0100006613.mm.1	2.02133	1.11162e-06	0.00736543
TC0200001071.mm.1	-2.76409	T	Dapk1	trans-acting transcription factor 9	Multiple_Complex	N/A	N/A	N/A	N/A	N/A	N/A
TC0400001592.mm.1	-1.29614	T	Cmtm5	DnaJ (Hsp40) homolog, subfamily C, member 8	Multiple_Complex	PSR0400012457.mm.1	1.97889	2.57535e-05	0.0370533
TC0800002723.mm.1	-1.29962	T	Dio2	nudix (nucleoside diphosphate linked moiety X)-type motif 21	Multiple_Complex	PSR0800020854.mm.1	1.94089	3.40869e-05	0.0431617
TC0300002277.mm.1	-2.83243	T	Jag1	CD1d1 antigen	Multiple_Complex	N/A	N/A	N/A	N/A	N/A	N/A
TC1100003471.mm.1	-1.24652	T	Ttc39c	predicted gene 11491 [Source:MGI Symbol;Acc:MGI:3651138]; novel transcript, antisense to Fam33a	NonCoding	PSR1100031879.mm.1	1.92545	3.9787e-05	0.0474723
TC0100003338.mm.1	-3.28118	T	Dync2h1	bone morphogenic protein/retinoic acid inducible neural-specific 2	Multiple_Complex	N/A	N/A	N/A	N/A	N/A	N/A
TC0100003566.mm.1	10.5721	T	Xlr5b	ATPase, Na+/K+ transporting, alpha 2 polypeptide	Multiple_Complex	PSR0100029296.mm.1	1.91325	3.429e-05	0.0432723
TC1400000780.mm.1	1.03892	T	Xlr5d-ps	copine VI	Multiple_Complex	N/A	N/A	N/A	N/A	N/A	N/A
TC0300001802.mm.1	-2.43211	T	Jag1	guanine nucleotide binding protein (G protein), beta 4	Multiple_Complex	PSR0300013968.mm.1	1.91071	3.71724e-05	0.0458458
TC1300002426.mm.1	2.44798	T	Cntn2	thrombospondin 4	Multiple_Complex	N/A	N/A	N/A	N/A	N/A	N/A
TC0500001972.mm.1	1.07353	T	Elmo1	predicted gene 9758	Multiple_Complex	PSR0500018018.mm.1	1.88881	1.56283e-05	0.0281875
TC0600002553.mm.1	-1.17737	T	Sema4f	sema domain, immunoglobulin domain (Ig), TM domain, and short cytoplasmic domain (Sema4f), transcript variant 2, mRNA.; sema domain, immunoglobulin domain (Ig), TM domain, and short cytoplasmic domain	Multiple_Complex	N/A	N/A	N/A	N/A	N/A	N/A
TC0400002465.mm.1	-1.3409	T	C230057M02Rik	DDB1 and CUL4 associated factor 12	Multiple_Complex	PSR0400019894.mm.1	1.82259	2.65427e-05	0.0375713
TC1200002411.mm.1	2.1051	T	Sox2ot	creatine kinase, brain	Multiple_Complex	N/A	N/A	N/A	N/A	N/A	N/A
TC1000000901.mm.1	-1.05295	T	Xlr5a	predicted gene 16105 [Source:MGI Symbol;Acc:MGI:3801737]; putative novel transcript	NonCoding	JUC1000003850.mm.1	1.81187	1.56996e-05	0.0281875
TC0200002411.mm.1	-2.73875	T	Inppl1	neuronatin	Multiple_Complex	N/A	N/A	N/A	N/A	N/A	N/A
TC1000000111.mm.1	1.03065	T	Dnah11	predicted gene 16234 [Source:MGI Symbol;Acc:MGI:3801867]; novel transcript	NonCoding	PSR1000000777.mm.1	1.64043	1.67177e-05	0.0293304
TC0400000381.mm.1	1.26205	T	Col2a1	interleukin 11 receptor, alpha chain 1	Multiple_Complex	N/A	N/A	N/A	N/A	N/A	N/A
TC0600000193.mm.1	2.50114	T	Ewsr1	protein tyrosine phosphatase, receptor type Z, polypeptide 1	Coding	JUC0600000604.mm.1	-1.80059	2.05316e-06	0.00975118
TC1200001885.mm.1	1.61857	T	Enox1	liver glycogen phosphorylase	Multiple_Complex	N/A	N/A	N/A	N/A	N/A	N/A
TC0100001204.mm.1	1.85027	T	Trim9	pleckstrin homology domain containing, family A member 6	Multiple_Complex	PSR0100009839.mm.1	-1.81441	1.87444e-05	0.0310346
TC0X00003287.mm.1	-2.52137	T	Stmn2	Nance-Horan syndrome (human)	Multiple_Complex	N/A	N/A	N/A	N/A	N/A	N/A
TC0300002451.mm.1	1.01295	T	Nav3	cingulin pseudogene; cDNA sequence BC021767	Multiple_Complex	PSR0300018830.mm.1	-2.10528	3.14446e-05	0.041581
TC1200001902.mm.1	-1.69903	T	Cyp2d41-ps	reticulon 1	Multiple_Complex	PSR1200013064.mm.1	-2.16901	3.34303e-05	0.0431086
TC1600002082.mm.1	1.46648	T	A630023P12Rik	phosphoribosylglycinamide formyltransferase	Multiple_Complex	PSR1600015991.mm.1	-2.18174	3.99771e-05	0.0475171
TC1300002279.mm.1	-3.39841	T	Xlr5c	ubiquitin-conjugating enzyme E2Q family-like 1	Multiple_Complex	N/A	N/A	N/A	N/A	N/A	N/A
TC1600000305.mm.1	-2.83977	T	C230091D08Rik	mitogen-activated protein kinase kinase kinase 13	Multiple_Complex	PSR1600003105.mm.1	-2.2006	2.6136e-05	0.0374214
TC1000002239.mm.1	-1.48067	T	Myt1l	sphingosine phosphate lyase 1	Multiple_Complex	N/A	N/A	N/A	N/A	N/A	N/A
TC0400002665.mm.1	2.55109	T	Dtna	ATP-binding cassette, sub-family A (ABC1), member 1; Synthetic construct Mus musculus clone IMAGE:100069521, MGC:199423 ATP-binding cassette, sub-family A (ABC1), member 1 (Abca1) mRNA, encodes complete protein.	Multiple_Complex	PSR0400021654.mm.1	-2.2275	5.42139e-07	0.00519479
TC0100001581.mm.1	-1.94585	T	Nacad	a disintegrin-like and metallopeptidase (reprolysin type) with thrombospondin type 1 motif, 4	Coding	N/A	N/A	N/A	N/A	N/A	N/A
TC0X00003287.mm.1	-2.52137	T	Dnah11	Nance-Horan syndrome (human)	Multiple_Complex	PSR0X00020546.mm.1	-2.2278	2.44876e-05	0.0364002
TC1100001550.mm.1	-1.35396	T	Xlr5e-ps	LIM and SH3 protein 1	Multiple_Complex	N/A	N/A	N/A	N/A	N/A	N/A
TC1400000763.mm.1	5.78364	T	Inppl1	CKLF-like MARVEL transmembrane domain containing 5	Coding	PSR1400005946.mm.1	-2.23986	3.39672e-05	0.0431617
TC0100001201.mm.1	-2.21658	T	Dync2h1	phosphoinositide-3-kinase, class 2, beta polypeptide	Multiple_Complex	N/A	N/A	N/A	N/A	N/A	N/A
TC0500001466.mm.1	2.49097	T	Xlr5b	transmembrane protein 132B	Multiple_Complex	PSR0500013282.mm.1	-2.2708	8.38954e-07	0.00669906
TC0700003844.mm.1	2.92463	T	Xlr5d-ps	inositol polyphosphate phosphatase-like 1	Coding	PSR0700032410.mm.1	-2.27751	2.40126e-05	0.0360381
TC0100002413.mm.1	-1.88196	T	Xlr5a	Ras association (RalGDS/AF-6) and pleckstrin homology domains 1	Multiple_Complex	N/A	N/A	N/A	N/A	N/A	N/A
TC1400001599.mm.1	2.11556	T	Sgip1	zinc finger, CCHC domain containing 24	Multiple_Complex	PSR1400012049.mm.1	-2.2795	3.37243e-07	0.0039595
TC0900003040.mm.1	9.75538	T	Sorcs1	solute carrier family 38, member 3	Multiple_Complex	N/A	N/A	N/A	N/A	N/A	N/A
TC0800001033.mm.1	2.6848	T	Nacad	naked cuticle 1 homolog (Drosophila)	Multiple_Complex	PSR0800007966.mm.1	-2.29388	2.75278e-05	0.037848
TC1000000874.mm.1	1.34912	T	Dtnbp1	signal peptide peptidase like 2B	Multiple_Complex	JUC1000003643.mm.1	-2.29815	1.69312e-05	0.029401
TC1400002280.mm.1	-1.71165	T	Stmn4	dihydropyrimidinase-like 2	Multiple_Complex	PSR1400017599.mm.1	-2.30345	1.10607e-05	0.022386
TC1000001625.mm.1	2.48273	T	Grid2ip	CD63 antigen	Coding	PSR1000011961.mm.1	-2.37011	3.60378e-05	0.044712
TC1100001938.mm.1	1.1624	T	Nkd1	predicted gene 11744	Multiple_Complex	JUC1100009600.mm.1	-2.42373	2.38803e-05	0.0359436
TC0200000302.mm.1	-2.1395	T	Cntn2	Bmi1 polycomb ring finger oncogene	Multiple_Complex	N/A	N/A	N/A	N/A	N/A	N/A
TC1600001379.mm.1	2.76791	T	Alkbh3	ets variant 5; ets variant gene 5	Multiple_Complex	PSR1600011468.mm.1	-2.4815	9.84787e-06	0.0213713
TC1300000908.mm.1	-2.27332	T	Grid2ip	proprotein convertase subtilisin/kexin type 1	Multiple_Complex	N/A	N/A	N/A	N/A	N/A	N/A
TC1600001679.mm.1	2.76126	T	Sppl2b	poliovirus receptor-related 3	Multiple_Complex	PSR1600013771.mm.1	-2.49783	8.53556e-06	0.0197629
TC0600002936.mm.1	1.76558	T	Sorcs1	ATPase, Ca++ transporting, plasma membrane 2	Multiple_Complex	PSR0600022586.mm.1	-2.51177	7.50599e-06	0.0185492
TC0700002644.mm.1	3.36834	T	Axl	AXL receptor tyrosine kinase	Multiple_Complex	N/A	N/A	N/A	N/A	N/A	N/A
TC0200001597.mm.1	-4.68802	T	Notum	metallophosphoesterase domain containing 2	Multiple_Complex	PSR0200012023.mm.1	-2.54855	2.32713e-06	0.0102855
TC1100000979.mm.1	2.85945	T	Wscd1	WSC domain containing 1	Multiple_Complex	PSR1100008782.mm.1	-2.5504	2.31784e-05	0.0351246
TC1000002543.mm.1	-1.51674	T	Celf5	CUGBP, Elav-like family member 5	Multiple_Complex	PSR1000019134.mm.1	-2.63935	2.78571e-05	0.0381324
TC1700000754.mm.1	-1.85189	T	Gabbr1	gamma-aminobutyric acid (GABA) B receptor, 1	Multiple_Complex	N/A	N/A	N/A	N/A	N/A	N/A
TC0200002772.mm.1	2.64183	T	Cdh4	cadherin 4; Synthetic construct Mus musculus clone IMAGE:100066328, MGC:195465 cadherin 4 (Cdh4) mRNA, encodes complete protein.	Multiple_Complex	PSR0200022611.mm.1	-2.67384	1.30221e-05	0.0248697
TC1100000294.mm.1	-3.68689	T	Ccdc88a	coiled coil domain containing 88A; coiled coil domain containing 88A (Ccdc88a), mRNA.	Multiple_Complex	N/A	N/A	N/A	N/A	N/A	N/A
TC1900000787.mm.1	2.58281	T	Tcf7l2	transcription factor 7 like 2, T cell specific, HMG box	Multiple_Complex	PSR1900006894.mm.1	-2.68953	6.32603e-06	0.0167947
TC1500001872.mm.1	-1.90611	T	Csnk1e	casein kinase 1, epsilon	Multiple_Complex	N/A	N/A	N/A	N/A	N/A	N/A
TC0200001448.mm.1	-2.75251	T	Trp53i11	transformation related protein 53 inducible protein 11	Multiple_Complex	JUC0200005610.mm.1	-2.69971	3.98344e-06	0.0134838
TC0700002763.mm.1	-2.47168	T	Arhgap33	Rho GTPase activating protein 33; Rho GTPase activating protein 33 (Arhgap33), mRNA.	Coding	N/A	N/A	N/A	N/A	N/A	N/A
TC0700002497.mm.1	3.27794	T	Anks1b	apolipoprotein E	Coding	PSR0700022056.mm.1	-2.70738	2.09832e-06	0.00975118
TC1000000131.mm.1	-2.91471	T	Nhsl1	NHS-like 1	Multiple_Complex	N/A	N/A	N/A	N/A	N/A	N/A
TC0900002455.mm.1	1.60192	T	Glce; Mir5133	glucuronyl C5-epimerase; microRNA 5133	Multiple_Complex	PSR0900020569.mm.1	-2.77064	8.81152e-06	0.0199119
TC0600003539.mm.1	-1.85799	T	D630045J12Rik	RIKEN cDNA D630045J12 gene	Multiple_Complex	N/A	N/A	N/A	N/A	N/A	N/A
TC0300003041.mm.1	3.02177	T	Bmpr1b	bone morphogenetic protein receptor, type 1B; bone morphogenetic protein receptor, type 1B (Bmpr1b), mRNA.	Coding	PSR0300023959.mm.1	-2.83864	3.28394e-05	0.0427076
TC1500000002.mm.1	2.14642	T	Sepp1	selenoprotein P, plasma, 1	Multiple_Complex	N/A	N/A	N/A	N/A	N/A	N/A
TC0400001712.mm.1	2.42098	T	Wwc1	Rap1 GTPase-activating protein	Multiple_Complex	PSR0400013834.mm.1	-2.90076	1.48218e-06	0.00846926
TC0900002956.mm.1	2.08529	T	Ephb1	Eph receptor B1	Multiple_Complex	N/A	N/A	N/A	N/A	N/A	N/A
TC0400004119.mm.1	3.80897	T	Prdm16	PR domain containing 16	Multiple_Complex	PSR0400034430.mm.1	-2.9708	2.19024e-05	0.0340242
TC0100001606.mm.1	-1.71674	T	Pex19	peroxisomal biogenesis factor 19	Multiple_Complex	N/A	N/A	N/A	N/A	N/A	N/A
TC0200000551.mm.1	1.7041	T	Ntrk2	argininosuccinate synthetase 1; argininosuccinate synthase pseudogene	Multiple_Complex	PSR0200004716.mm.1	8.90901	1.70412e-06	0.0091498	Cassette Exon	0.293022
TC0900002105.mm.1	1.09413	T	Crtam	cytotoxic and regulatory T cell molecule; cytotoxic and regulatory T cell molecule (Crtam), mRNA.	Coding	N/A	N/A	N/A	N/A	N/A	N/A
TC0300002342.mm.1	-1.76798	T	Trim46	tripartite motif-containing 46	Multiple_Complex	PSR0300017931.mm.1	-3.05928	6.30457e-06	0.0167947
TC1700002783.mm.1	-1.06889	T	Gpsm3	G-protein signalling modulator 3 (AGS3-like, C. elegans)	Coding	N/A	N/A	N/A	N/A	N/A	N/A
TC0700004666.mm.1	2.3876	T	Fgfr2	fibroblast growth factor receptor 2; fibroblast growth factor receptor 2 (Fgfr2), transcript variant 1, mRNA.; fibroblast growth factor receptor 2 (Fgfr2), transcript variant 2, mRNA.	Multiple_Complex	JUC0700019402.mm.1	-3.07019	2.7157e-05	0.0377285
TC1500001830.mm.1	1.05958	T	Tex33	testis expressed 33	Coding	N/A	N/A	N/A	N/A	N/A	N/A
TC0100001282.mm.1	-1.47955	T	Gm4258; Gm26930; RP23-393I12.2; RP23-393I12.5	predicted gene 4258 [Source:MGI Symbol;Acc:MGI:3782435]; predicted gene, 26930; novel transcript	NonCoding	PSR0100010657.mm.1	-3.0814	1.96713e-05	0.0317407
TC1700000572.mm.1	-1.14249	T	Zfp952	zinc finger protein 952	Multiple_Complex	N/A	N/A	N/A	N/A	N/A	N/A
TC0200001597.mm.1	-4.68802	T	Notum	metallophosphoesterase domain containing 2	Multiple_Complex	JUC0200006001.mm.1	-3.10227	3.21427e-06	0.0121666
TC0700000296.mm.1	-1.78538	T	Rtn2	reticulon 2 (Z-band associated protein); reticulon 2 (Z-band associated protein) (Rtn2), transcript variant B, mRNA.	Coding	N/A	N/A	N/A	N/A	N/A	N/A
TC0200002772.mm.1	2.64183	T	Cdh4	cadherin 4; Synthetic construct Mus musculus clone IMAGE:100066328, MGC:195465 cadherin 4 (Cdh4) mRNA, encodes complete protein.	Multiple_Complex	PSR0200022609.mm.1	-3.10442	1.34077e-07	0.00219757
TC0500003000.mm.1	-1.89601	T	Ulk1	unc-51 like kinase 1	Multiple_Complex	N/A	N/A	N/A	N/A	N/A	N/A
TC0400001076.mm.1	3.24505	T	Dab1	disabled 1; disabled 1 (Dab1), transcript variant 2, mRNA.	Multiple_Complex	PSR0400007365.mm.1	-3.15821	3.56772e-06	0.0128444
TC0700001896.mm.1	-1.08664	T	Plpp4	phospholipid phosphatase 4	Coding	N/A	N/A	N/A	N/A	N/A	N/A
TC0800002783.mm.1	2.34158	T	Cdh11	cadherin 11	Coding	JUC0800011648.mm.1	-3.17537	2.1368e-05	0.0336372
TC1300002679.mm.1	-1.00527	T	Il31ra	interleukin 31 receptor A	Coding	N/A	N/A	N/A	N/A	N/A	N/A
TC0100002758.mm.1	4.01082	T	Mpped2	endothelin converting enzyme-like 1	Multiple_Complex	PSR0100022275.mm.1	-3.20398	1.91784e-08	0.000765763
TC1300002059.mm.1	-2.35884	T	Dbn1	drebrin 1	Multiple_Complex	N/A	N/A	N/A	N/A	N/A	N/A
TC1100002755.mm.1	1.80509	T	Ntrk2	PDZ and LIM domain 4	Multiple_Complex	PSR1100024982.mm.1	8.63118	8.44808e-08	0.00163218	Cassette Exon	0.252416
TC1700002597.mm.1	-3.08876	T	Slc8a1	solute carrier family 8 (sodium/calcium exchanger), member 1; solute carrier family 8 (sodium/calcium exchanger), member 1 (Slc8a1), transcript variant B, mRNA.	Multiple_Complex	N/A	N/A	N/A	N/A	N/A	N/A
TC0200004154.mm.1	3.58712	T	Gad1	tetraspanin 18	Multiple_Complex	PSR0200034864.mm.1	-3.2658	2.50132e-05	0.0366565
TC0300002938.mm.1	-2.26424	T	Ccdc109b	coiled-coil domain containing 109B	Coding	N/A	N/A	N/A	N/A	N/A	N/A
TC0200000801.mm.1	-3.18289	T	Ntrk2	kinesin family member 5C	Multiple_Complex	PSR0200006657.mm.1	8.51647	1.6976e-05	0.029401	Alternative 3' Acceptor Site	0.257149
TC1600001373.mm.1	-1.25691	T	Tmem41a	transmembrane protein 41a	Multiple_Complex	N/A	N/A	N/A	N/A	N/A	N/A
TC0100002758.mm.1	4.01082	T	Ntrk2	endothelin converting enzyme-like 1	Multiple_Complex	PSR0100022263.mm.1	8.19598	5.27189e-06	0.0154138	Cassette Exon	0.30785
TC0X00002770.mm.1	1.03477	T	4930519F16Rik	RIKEN cDNA 4930519F16 gene	Multiple_Complex	N/A	N/A	N/A	N/A	N/A	N/A
TC0200003245.mm.1	3.4568	T	Ntrk2	netrin G2; RIKEN cDNA 6530402F18 gene	Multiple_Complex	PSR0200027399.mm.1	6.66444	4.19382e-08	0.00138547	Alternative 3' Acceptor Site	0.235309
TC0400002098.mm.1	-1.72866	T	Acap3	ArfGAP with coiled-coil, ankyrin repeat and PH domains 3	Multiple_Complex	N/A	N/A	N/A	N/A	N/A	N/A
TC0800002310.mm.1	3.69329	T	Cpe	carboxypeptidase E	Multiple_Complex	PSR0800017431.mm.1	-3.37397	1.47963e-08	0.000745038
TC1100001687.mm.1	-2.66672	T	Rundc3a	RUN domain containing 3A	Multiple_Complex	N/A	N/A	N/A	N/A	N/A	N/A
TC0200003365.mm.1	1.33312	T	Nudt21	glycoprotein galactosyltransferase alpha 1, 3	Multiple_Complex	PSR0200028961.mm.1	4.93524	1.75509e-05	0.0300308	Cassette Exon	0.229911
TC0200002077.mm.1	-2.5616	T	Snap25	synaptosomal-associated protein 25	Multiple_Complex	N/A	N/A	N/A	N/A	N/A	N/A
TC0100000778.mm.1	1.50648	T	Nudt4	RIKEN cDNA 2810459M11 gene	Coding	PSR0100006499.mm.1	6.20175	2.87996e-05	0.0389096	Alternative 5' Donor Site	0.269388
TC0X00000963.mm.1	-1.53728	T	Dlg3	discs, large homolog 3 (Drosophila)	Multiple_Complex	N/A	N/A	N/A	N/A	N/A	N/A
TC0200003529.mm.1	-3.55235	T	Nudt4	nebulin	Multiple_Complex	PSR0200030175.mm.1	6.14298	3.92616e-06	0.0134359	Cassette Exon	0.245064
TC1100001482.mm.1	-1.15816	T	Snf8	SNF8, ESCRT-II complex subunit, homolog (S. cerevisiae)	Multiple_Complex	N/A	N/A	N/A	N/A	N/A	N/A
TC0700000023.mm.1	4.06591	T	Neb	tweety homolog 1 (Drosophila)	Multiple_Complex	PSR0700000291.mm.1	-3.4842	1.89762e-05	0.0311847
TC1700002431.mm.1	-1.42561	T	Mtcl1	microtubule crosslinking factor 1	Multiple_Complex	N/A	N/A	N/A	N/A	N/A	N/A
TC0900002254.mm.1	-7.67622	T	Pdlim4	neural cell adhesion molecule 1	Multiple_Complex	PSR0900018791.mm.1	7.61407	1.76471e-06	0.00925483	Cassette Exon	0.23315
TC0100001387.mm.1	2.38671	T	Glul; Mir8114	glutamate-ammonia ligase (glutamine synthetase); microRNA 8114	Multiple_Complex	N/A	N/A	N/A	N/A	N/A	N/A
TC0200004154.mm.1	3.58712	T	Pdzrn3	tetraspanin 18	Multiple_Complex	PSR0200034850.mm.1	4.97154	7.0573e-06	0.0177675	Alternative 5' Donor Site	0.2337
TC0400001592.mm.1	-1.29614	T	Dnajc8	DnaJ (Hsp40) homolog, subfamily C, member 8	Multiple_Complex	N/A	N/A	N/A	N/A	N/A	N/A
TC0200001204.mm.1	3.3776	T	Fam171b	family with sequence similarity 171, member B	Multiple_Complex	PSR0200009648.mm.1	-3.63091	7.84845e-08	0.00163218
TC0800002723.mm.1	-1.29962	T	Nudt21	nudix (nucleoside diphosphate linked moiety X)-type motif 21	Multiple_Complex	N/A	N/A	N/A	N/A	N/A	N/A
TC0300003246.mm.1	1.33346	T	Pex19	glutathione S-transferase, mu 3	Coding	PSR0300021294.mm.1	3.58031	3.39907e-06	0.0123605	Cassette Exon	0.268285
TC1100003471.mm.1	-1.24652	T	Gm11491; RP23-352L3.6	predicted gene 11491 [Source:MGI Symbol;Acc:MGI:3651138]; novel transcript, antisense to Fam33a	NonCoding	N/A	N/A	N/A	N/A	N/A	N/A
TC1200001064.mm.1	-1.75436	T	D430019H16Rik	RIKEN cDNA D430019H16 gene	Multiple_Complex	PSR1200007583.mm.1	-3.66178	1.14067e-05	0.0226978
TC0300001802.mm.1	-2.43211	T	Gnb4	guanine nucleotide binding protein (G protein), beta 4	Multiple_Complex	N/A	N/A	N/A	N/A	N/A	N/A
TC0500000422.mm.1	-4.83361	T	Pfn2	collapsin response mediator protein 1; collapsin response mediator protein 1 (Crmp1), transcript variant 1, mRNA.	Multiple_Complex	PSR0500004184.mm.1	5.0421	1.04824e-06	0.00709647	Alternative 3' Acceptor Site	0.227752
TC0500001972.mm.1	1.07353	T	Gm9758	predicted gene 9758	Multiple_Complex	N/A	N/A	N/A	N/A	N/A	N/A
TC0100002758.mm.1	4.01082	T	Mpped2	endothelin converting enzyme-like 1	Multiple_Complex	PSR0100022279.mm.1	-3.6992	1.14909e-05	0.022779
TC0200005246.mm.1	1.46573	T			NonCoding	N/A	N/A	N/A	N/A	N/A	N/A
TC0200005246.mm.1	1.46573	T			NonCoding	JUC0200023121.mm.1	1.85583	1.1393e-05	0.0226978
TC0400002465.mm.1	-1.3409	T	Dcaf12	DDB1 and CUL4 associated factor 12	Multiple_Complex	N/A	N/A	N/A	N/A	N/A	N/A
TC1300000718.mm.1	3.60976	T	Plekha6	neurotrophic tyrosine kinase, receptor, type 2; neurotrophic tyrosine kinase, receptor, type 2 (Ntrk2), transcript variant 1, mRNA.	Multiple_Complex	PSR1300004738.mm.1	3.25171	2.11359e-06	0.00975118	Cassette Exon	0.305643
TC1000000901.mm.1	-1.05295	T	Gm16105; AC159474.3	predicted gene 16105 [Source:MGI Symbol;Acc:MGI:3801737]; putative novel transcript	NonCoding	N/A	N/A	N/A	N/A	N/A	N/A
TC0300002035.mm.1	-3.1359	T	Plekha6	profilin 2	Coding	PSR0300015383.mm.1	-5.11415	5.29606e-06	0.0154138	Cassette Exon	0.247034
TC1100002896.mm.1	1.47856	T			NonCoding	N/A	N/A	N/A	N/A	N/A	N/A
TC1100002896.mm.1	1.47856	T			NonCoding	PSR1100026259.mm.1	1.69408	1.21201e-05	0.0236638
TC1000000111.mm.1	1.03065	T	Gm16234; RP24-430N21.3	predicted gene 16234 [Source:MGI Symbol;Acc:MGI:3801867]; novel transcript	NonCoding	N/A	N/A	N/A	N/A	N/A	N/A
TC0200001377.mm.1	4.42497	T	Tspan18	low density lipoprotein receptor-related protein 4	Multiple_Complex	PSR0200010684.mm.1	-3.74785	4.94294e-06	0.0153165
TC0600000193.mm.1	2.50114	T	Ptprz1	protein tyrosine phosphatase, receptor type Z, polypeptide 1	Coding	N/A	N/A	N/A	N/A	N/A	N/A
TC0200001204.mm.1	3.3776	T	Fam171b	family with sequence similarity 171, member B	Multiple_Complex	PSR0200009647.mm.1	-3.77621	9.23987e-07	0.0070107
TC0100001204.mm.1	1.85027	T	Plekha6	pleckstrin homology domain containing, family A member 6	Multiple_Complex	N/A	N/A	N/A	N/A	N/A	N/A
TC1800000105.mm.1	-4.09022	T	Plekhg2	tetratricopeptide repeat domain 39C	Multiple_Complex	PSR1800000813.mm.1	5.8053	3.02989e-05	0.0402368	Alternative 5' Donor Site	0.264135
TC0300002451.mm.1	1.01295	T	BC021767	cingulin pseudogene; cDNA sequence BC021767	Multiple_Complex	N/A	N/A	N/A	N/A	N/A	N/A
TC0200003529.mm.1	-3.55235	T	Plpp4	nebulin	Multiple_Complex	PSR0200030034.mm.1	3.47928	4.5917e-06	0.0147415	Alternative 3' Acceptor Site	0.215807
TC1200001902.mm.1	-1.69903	T	Rtn1	reticulon 1	Multiple_Complex	N/A	N/A	N/A	N/A	N/A	N/A
TC0600002079.mm.1	4.8146	T	Ptn	pleiotrophin	Multiple_Complex	PSR0600016347.mm.1	-3.64341	1.62843e-05	0.0288136	Alternative 3' Acceptor Site	0.229434
TC1600002082.mm.1	1.46648	T	Gart	phosphoribosylglycinamide formyltransferase	Multiple_Complex	N/A	N/A	N/A	N/A	N/A	N/A
TC1900001722.mm.1	3.84185	T	Gfra1	glial cell line derived neurotrophic factor family receptor alpha 1; glial cell line derived neurotrophic factor family receptor alpha 1 (Gfra1), mRNA.	Multiple_Complex	PSR1900015262.mm.1	-3.85526	4.56349e-07	0.00464754
TC1600000305.mm.1	-2.83977	T	Map3k13	mitogen-activated protein kinase kinase kinase 13	Multiple_Complex	N/A	N/A	N/A	N/A	N/A	N/A
TC0200002437.mm.1	-5.70734	T	Ptprz1	solute carrier family 32 (GABA vesicular transporter), member 1	Coding	PSR0200019809.mm.1	4.53897	1.07464e-08	0.000734397	Cassette Exon	0.234859
TC0400002665.mm.1	2.55109	T	Abca1	ATP-binding cassette, sub-family A (ABC1), member 1; Synthetic construct Mus musculus clone IMAGE:100069521, MGC:199423 ATP-binding cassette, sub-family A (ABC1), member 1 (Abca1) mRNA, encodes complete protein.	Multiple_Complex	N/A	N/A	N/A	N/A	N/A	N/A
TC1600001679.mm.1	2.76126	T	Pvrl3	poliovirus receptor-related 3	Multiple_Complex	PSR1600013773.mm.1	-4.03883	3.73249e-06	0.0132086
TC1400000763.mm.1	5.78364	T	Cmtm5	CKLF-like MARVEL transmembrane domain containing 5	Coding	N/A	N/A	N/A	N/A	N/A	N/A
TC0500002865.mm.1	-5.01746	T	Raver2	mitogen-activated protein kinase 10; mitogen activated protein kinase 10	Multiple_Complex	PSR0500025318.mm.1	3.54024	7.65961e-06	0.018628	Alternative 5' Donor Site	0.208218
TC0700003844.mm.1	2.92463	T	Inppl1	inositol polyphosphate phosphatase-like 1	Coding	N/A	N/A	N/A	N/A	N/A	N/A
TC0200001377.mm.1	4.42497	T	Tspan18	low density lipoprotein receptor-related protein 4	Multiple_Complex	JUC0200005387.mm.1	-4.09419	2.42314e-05	0.03612
TC1100004164.mm.1	-1.54795	T	Rbfox3	RNA binding protein, fox-1 homolog (C. elegans) 3	Multiple_Complex	PSR1100039607.mm.1	-4.12231	3.39173e-05	0.0431617	Cassette Exon	0.230644
TC0800001033.mm.1	2.6848	T	Nkd1	naked cuticle 1 homolog (Drosophila)	Multiple_Complex	N/A	N/A	N/A	N/A	N/A	N/A
TC1200000622.mm.1	1.73117	T	Lrrc9	leucine rich repeat containing 9	Multiple_Complex	JUC1200002411.mm.1	-4.1367	1.09769e-05	0.022386
TC1000000874.mm.1	1.34912	T	Sppl2b	signal peptide peptidase like 2B	Multiple_Complex	N/A	N/A	N/A	N/A	N/A	N/A
TC0900000829.mm.1	3.68315	T	Igdcc4	immunoglobulin superfamily, DCC subclass, member 4; Synthetic construct Mus musculus clone IMAGE:100062874, MGC:190982 immunoglobulin superfamily, DCC subclass, member 4 (Igdcc4) mRNA, encodes complete protein.	Multiple_Complex	PSR0900006283.mm.1	-4.19978	5.67112e-06	0.0156984
TC1400002280.mm.1	-1.71165	T	Dpysl2	dihydropyrimidinase-like 2	Multiple_Complex	N/A	N/A	N/A	N/A	N/A	N/A
TC0600000775.mm.1	2.96055	T	Gng12	guanine nucleotide binding protein (G protein), gamma 12	Multiple_Complex	PSR0600005801.mm.1	-4.22109	1.45443e-05	0.026912
TC0600001825.mm.1	-3.58769	T			NonCoding	N/A	N/A	N/A	N/A	N/A	N/A
TC0600001825.mm.1	-3.58769	T			NonCoding	PSR0600014431.mm.1	-2.34143	3.59544e-05	0.0446976
TC1000001625.mm.1	2.48273	T	Cd63	CD63 antigen	Coding	N/A	N/A	N/A	N/A	N/A	N/A
TC1100002003.mm.1	2.16588	T	Bmpr1b	ring finger protein 213	Multiple_Complex	JUC1100010018.mm.1	-4.31867	4.01549e-05	0.0476375
TC1100001938.mm.1	1.1624	T	Gm11744	predicted gene 11744	Multiple_Complex	N/A	N/A	N/A	N/A	N/A	N/A
TC1100001568.mm.1	2.23117	T	Rnasel	v-erb-b2 erythroblastic leukemia viral oncogene homolog 2, neuro/glioblastoma derived oncogene homolog (avian)	Multiple_Complex	PSR1100014502.mm.1	12.8313	9.91726e-06	0.0214441	Cassette Exon	0.318531
TC1600001379.mm.1	2.76791	T	Etv5	ets variant 5; ets variant gene 5	Multiple_Complex	N/A	N/A	N/A	N/A	N/A	N/A
TC0200001524.mm.1	5.00451	T	Slc1a2	solute carrier family 1 (glial high affinity glutamate transporter), member 2	Multiple_Complex	JUC0200005728.mm.1	-4.37137	6.95192e-06	0.0177675
TC1600001679.mm.1	2.76126	T	Pvrl3	poliovirus receptor-related 3	Multiple_Complex	N/A	N/A	N/A	N/A	N/A	N/A
TC0900002388.mm.1	-2.65363	T	Clstn2	immunoglobulin superfamily containing leucine-rich repeat 2	Coding	PSR0900020063.mm.1	-4.39482	2.90368e-05	0.0390606
TC0800000796.mm.1	2.51649	T	Slc27a1	solute carrier family 27 (fatty acid transporter), member 1	Coding	JUC0800003052.mm.1	-4.43058	7.68893e-06	0.018628
TC0600002936.mm.1	1.76558	T	Atp2b2	ATPase, Ca++ transporting, plasma membrane 2	Multiple_Complex	N/A	N/A	N/A	N/A	N/A	N/A
TC0400004119.mm.1	3.80897	T	Prdm16	PR domain containing 16	Multiple_Complex	JUC0400017961.mm.1	-4.45891	3.37983e-05	0.0431617
TC1100000979.mm.1	2.85945	T	Wscd1	WSC domain containing 1	Multiple_Complex	N/A	N/A	N/A	N/A	N/A	N/A
TC0100002758.mm.1	4.01082	T	Rtn2	endothelin converting enzyme-like 1	Multiple_Complex	PSR0100022268.mm.1	5.00514	2.27054e-06	0.0101738	Cassette Exon	0.2288
TC1000002543.mm.1	-1.51674	T	Celf5	CUGBP, Elav-like family member 5	Multiple_Complex	N/A	N/A	N/A	N/A	N/A	N/A
TC0500003008.mm.1	-3.67055	T	Rundc3a	RIKEN cDNA E130006D01 gene	NonCoding	PSR0500026679.mm.1	3.42039	2.02099e-05	0.0323582	Cassette Exon	0.231672
TC0700000023.mm.1	4.06591	T	S1pr1	tweety homolog 1 (Drosophila)	Multiple_Complex	PSR0700000320.mm.1	-3.02081	2.67836e-05	0.0375713	Intron Retention	0.31465
TC0200002772.mm.1	2.64183	T	Cdh4	cadherin 4; Synthetic construct Mus musculus clone IMAGE:100066328, MGC:195465 cadherin 4 (Cdh4) mRNA, encodes complete protein.	Multiple_Complex	N/A	N/A	N/A	N/A	N/A	N/A
TC0900000829.mm.1	3.68315	T	Igdcc4	immunoglobulin superfamily, DCC subclass, member 4; Synthetic construct Mus musculus clone IMAGE:100062874, MGC:190982 immunoglobulin superfamily, DCC subclass, member 4 (Igdcc4) mRNA, encodes complete protein.	Multiple_Complex	PSR0900006285.mm.1	-4.71247	7.0363e-07	0.00592261
TC1200001886.mm.1	4.77345	T	Trim9	tripartite motif-containing 9	Multiple_Complex	JUC1200007185.mm.1	-4.74407	1.23654e-05	0.0238438
TC1900000787.mm.1	2.58281	T	Tcf7l2	transcription factor 7 like 2, T cell specific, HMG box	Multiple_Complex	N/A	N/A	N/A	N/A	N/A	N/A
TC1300001638.mm.1	1.61398	T	Hist1h2ac	histone cluster 1, H2ac	Multiple_Complex	PSR1300010160.mm.1	-4.80964	1.01712e-06	0.0070107
TC0200001448.mm.1	-2.75251	T	Trp53i11	transformation related protein 53 inducible protein 11	Multiple_Complex	N/A	N/A	N/A	N/A	N/A	N/A
TC0700000921.mm.1	5.9753	T	Luzp2	leucine zipper protein 2	Multiple_Complex	PSR0700008325.mm.1	-4.83407	1.43937e-05	0.026912
TC0900002455.mm.1	1.60192	T	Glce; Mir5133	glucuronyl C5-epimerase; microRNA 5133	Multiple_Complex	N/A	N/A	N/A	N/A	N/A	N/A
TC0100002758.mm.1	4.01082	T	Sardh	endothelin converting enzyme-like 1	Multiple_Complex	PSR0100022264.mm.1	5.92468	6.32085e-07	0.00562403	Cassette Exon	0.260236
TC0300003041.mm.1	3.02177	T	Bmpr1b	bone morphogenetic protein receptor, type 1B; bone morphogenetic protein receptor, type 1B (Bmpr1b), mRNA.	Coding	N/A	N/A	N/A	N/A	N/A	N/A
TC1100002733.mm.1	1.46811	T	Sardh	sosondowah ankyrin repeat domain family member A	Coding	PSR1100024830.mm.1	5.82921	2.76823e-07	0.00338067	Alternative 5' Donor Site	0.274913
TC0400004119.mm.1	3.80897	T	Prdm16	PR domain containing 16	Multiple_Complex	N/A	N/A	N/A	N/A	N/A	N/A
TC1500001806.mm.1	-1.01929	T	Gm3787	PREDICTED: predicted gene 3787 (Gm3787), mRNA.	Multiple_Complex	PSR1500014018.mm.1	-4.96672	1.12577e-05	0.0225455
TC1400002180.mm.1	16.2997	T	Sema4f	tumor necrosis factor receptor superfamily, member 19	Coding	PSR1400016893.mm.1	-10.7362	9.91271e-09	0.000734397	Cassette Exon	0.271885
TC0300002342.mm.1	-1.76798	T	Trim46	tripartite motif-containing 46	Multiple_Complex	N/A	N/A	N/A	N/A	N/A	N/A
TC1000002531.mm.1	-6.28113	T	Sema7a	ataxia, cerebellar, Cayman type homolog (human)	Multiple_Complex	PSR1000018940.mm.1	-4.54948	2.71985e-05	0.0377285	Cassette Exon	0.232143
TC0700004666.mm.1	2.3876	T	Fgfr2	fibroblast growth factor receptor 2; fibroblast growth factor receptor 2 (Fgfr2), transcript variant 1, mRNA.; fibroblast growth factor receptor 2 (Fgfr2), transcript variant 2, mRNA.	Multiple_Complex	N/A	N/A	N/A	N/A	N/A	N/A
TC0100002758.mm.1	4.01082	T	Mpped2	endothelin converting enzyme-like 1	Multiple_Complex	PSR0100022282.mm.1	-5.10098	8.06312e-06	0.0189508
TC0100001282.mm.1	-1.47955	T	Gm4258; Gm26930; RP23-393I12.2; RP23-393I12.5	predicted gene 4258 [Source:MGI Symbol;Acc:MGI:3782435]; predicted gene, 26930; novel transcript	NonCoding	N/A	N/A	N/A	N/A	N/A	N/A
TC0100003791.mm.1	-5.66821	T	Serinc2	prospero homeobox 1; prospero-related homeobox 1; prospero-related homeobox 1 (Prox1), mRNA.	Multiple_Complex	PSR0100030984.mm.1	6.86338	2.22361e-06	0.010109	Cassette Exon	0.266655
TC0400001076.mm.1	3.24505	T	Dab1	disabled 1; disabled 1 (Dab1), transcript variant 2, mRNA.	Multiple_Complex	N/A	N/A	N/A	N/A	N/A	N/A
TC0100002758.mm.1	4.01082	T	Mpped2	endothelin converting enzyme-like 1	Multiple_Complex	PSR0100022280.mm.1	-5.18616	5.93661e-08	0.00163218
TC1600001884.mm.1	-5.18981	T	Sh3gl2	roundabout homolog 2 (Drosophila)	Multiple_Complex	PSR1600014858.mm.1	-4.50756	2.29663e-05	0.0348882	Cassette Exon	0.300772
TC0800002783.mm.1	2.34158	T	Cdh11	cadherin 11	Coding	N/A	N/A	N/A	N/A	N/A	N/A
TC0200003214.mm.1	1.81769	T	Shtn1	sarcosine dehydrogenase	Multiple_Complex	PSR0200027067.mm.1	10.6235	1.23046e-05	0.0238002	Cassette Exon	0.251095
TC1500001021.mm.1	-1.36342	T	Asic1	acid-sensing (proton-gated) ion channel 1	Multiple_Complex	N/A	N/A	N/A	N/A	N/A	N/A
TC1400001288.mm.1	2.78814	T	Shtn1	claudin 10	Coding	PSR1400009708.mm.1	9.4015	1.95548e-06	0.00970256	Cassette Exon	0.228531
TC0500003193.mm.1	2.19983	T	Aldh2	aldehyde dehydrogenase 2, mitochondrial	Multiple_Complex	N/A	N/A	N/A	N/A	N/A	N/A
TC0100000808.mm.1	2.89778	T	Shtn1	protease, serine 56	Multiple_Complex	PSR0100006750.mm.1	5.58748	1.83515e-05	0.0308293	Cassette Exon	0.270283
TC1700001105.mm.1	-3.71581	T	Epb41l3	erythrocyte membrane protein band 4.1 like 3	Multiple_Complex	N/A	N/A	N/A	N/A	N/A	N/A
TC0500000361.mm.1	5.36932	T	Fgfr3	fibroblast growth factor receptor 3	Multiple_Complex	PSR0500003389.mm.1	-5.36357	7.81071e-06	0.0186448
TC0800002310.mm.1	3.69329	T	Cpe	carboxypeptidase E	Multiple_Complex	N/A	N/A	N/A	N/A	N/A	N/A
TC1000002543.mm.1	-1.51674	T	Celf5	CUGBP, Elav-like family member 5	Multiple_Complex	JUC1000010484.mm.1	-5.40131	1.0546e-05	0.0219679
TC0100000452.mm.1	3.7028	T	Gm973	predicted gene 973	Coding	N/A	N/A	N/A	N/A	N/A	N/A
TC0200004154.mm.1	3.58712	T	Slc13a3	tetraspanin 18	Multiple_Complex	PSR0200034853.mm.1	4.60749	6.36375e-06	0.0167947	Cassette Exon	0.296112
TC0200001204.mm.1	3.3776	T	Fam171b	family with sequence similarity 171, member B	Multiple_Complex	N/A	N/A	N/A	N/A	N/A	N/A
TC0300002543.mm.1	-1.80201	T	Pde4dip; Mir7225	phosphodiesterase 4D interacting protein (myomegalin); microRNA 7225	Multiple_Complex	JUC0300010341.mm.1	-5.50139	3.93383e-05	0.0471176
TC0500000361.mm.1	5.36932	T	Fgfr3	fibroblast growth factor receptor 3	Multiple_Complex	JUC0500001902.mm.1	-5.54383	9.02959e-06	0.0201574
TC0600002079.mm.1	4.8146	T	Ptn	pleiotrophin	Multiple_Complex	N/A	N/A	N/A	N/A	N/A	N/A
TC0200003245.mm.1	3.4568	T	Slc32a1	netrin G2; RIKEN cDNA 6530402F18 gene	Multiple_Complex	PSR0200027387.mm.1	4.15235	1.55488e-06	0.00865914	Cassette Exon	0.30552
TC1200001064.mm.1	-1.75436	T	D430019H16Rik	RIKEN cDNA D430019H16 gene	Multiple_Complex	N/A	N/A	N/A	N/A	N/A	N/A
TC0200003245.mm.1	3.4568	T	Slc38a3	netrin G2; RIKEN cDNA 6530402F18 gene	Multiple_Complex	PSR0200027398.mm.1	5.18673	8.70458e-08	0.00163218	Alternative 3' Acceptor Site	0.235307
TC1700002348.mm.1	-3.21367	T	Tubb4a	tubulin, beta 4A class IVA	Coding	N/A	N/A	N/A	N/A	N/A	N/A
TC0200001377.mm.1	4.42497	T	Tspan18	low density lipoprotein receptor-related protein 4	Multiple_Complex	PSR0200010683.mm.1	-5.722	7.51144e-06	0.0185492
TC1900001722.mm.1	3.84185	T	Gfra1	glial cell line derived neurotrophic factor family receptor alpha 1; glial cell line derived neurotrophic factor family receptor alpha 1 (Gfra1), mRNA.	Multiple_Complex	N/A	N/A	N/A	N/A	N/A	N/A
TC0X00003437.mm.1	1.05273	T	Slc38a3	interleukin 2 receptor, gamma chain	Multiple_Complex	PSR0X00017126.mm.1	3.49313	4.094e-05	0.0482017	Alternative 3' Acceptor Site	0.222865
TC1000002531.mm.1	-6.28113	T	Slc4a4	ataxia, cerebellar, Cayman type homolog (human)	Multiple_Complex	PSR1000018943.mm.1	5.08087	1.61515e-07	0.00241536	Cassette Exon	0.294225
TC0500002887.mm.1	2.9158	T	Sparcl1	SPARC-like 1	Coding	N/A	N/A	N/A	N/A	N/A	N/A
TC0100000039.mm.1	4.70637	T	Adhfe1	alcohol dehydrogenase, iron containing, 1	Multiple_Complex	JUC0100000138.mm.1	-5.96944	2.65756e-05	0.0375713
TC0300000974.mm.1	5.97098	T	Notch2	notch 2; Synthetic construct Mus musculus clone IMAGE:100069450, MGC:199352 Notch gene homolog 2 (Drosophila) (Notch2) mRNA, encodes complete protein.	Multiple_Complex	N/A	N/A	N/A	N/A	N/A	N/A
TC0100003079.mm.1	-1.69544	T	Cntn2	contactin 2	Multiple_Complex	JUC0100014017.mm.1	-5.98902	1.00794e-05	0.0214572
TC1000000193.mm.1	4.80281	T	Slc6a11	vanin 1	Coding	PSR1000001434.mm.1	3.8515	3.32968e-05	0.0430254	Alternative 5' Donor Site	0.222375
TC0300000974.mm.1	5.97098	T	Notch2	notch 2; Synthetic construct Mus musculus clone IMAGE:100069450, MGC:199352 Notch gene homolog 2 (Drosophila) (Notch2) mRNA, encodes complete protein.	Multiple_Complex	PSR0300007868.mm.1	-6.03131	5.13726e-06	0.0154138
TC1200002506.mm.1	-1.13908	T	Dnah11	dynein, axonemal, heavy chain 11	Multiple_Complex	N/A	N/A	N/A	N/A	N/A	N/A
TC0600001266.mm.1	15.1101	T	Slc6a11	solute carrier family 6 (neurotransmitter transporter, GABA), member 11	Coding	PSR0600009963.mm.1	-6.90007	4.62641e-07	0.00464754	Cassette Exon	0.2209
TC0200001377.mm.1	4.42497	T	Snap25	low density lipoprotein receptor-related protein 4	Multiple_Complex	PSR0200010723.mm.1	4.96286	7.05275e-08	0.00163218	Cassette Exon	0.326839
TC1700001822.mm.1	3.11793	T	Cbs	cystathionine beta-synthase	Multiple_Complex	PSR1700016773.mm.1	-6.17495	6.5909e-06	0.0171758
TC1100004164.mm.1	-1.54795	T	Rbfox3	RNA binding protein, fox-1 homolog (C. elegans) 3	Multiple_Complex	N/A	N/A	N/A	N/A	N/A	N/A
TC0500002394.mm.1	4.65319	T	Ppargc1a	peroxisome proliferative activated receptor, gamma, coactivator 1 alpha	Multiple_Complex	PSR0500021683.mm.1	-6.21275	5.38019e-06	0.0155137
TC1200000622.mm.1	1.73117	T	Lrrc9	leucine rich repeat containing 9	Multiple_Complex	N/A	N/A	N/A	N/A	N/A	N/A
TC0700000050.mm.1	1.12498	T	Ssc5d	scavenger receptor cysteine rich family, 5 domains; scavenger receptor cysteine rich domain containing (5 domains)	Coding	JUC0700000300.mm.1	-6.23081	2.42356e-05	0.03612
TC0900000829.mm.1	3.68315	T	Igdcc4	immunoglobulin superfamily, DCC subclass, member 4; Synthetic construct Mus musculus clone IMAGE:100062874, MGC:190982 immunoglobulin superfamily, DCC subclass, member 4 (Igdcc4) mRNA, encodes complete protein.	Multiple_Complex	N/A	N/A	N/A	N/A	N/A	N/A
TC0100000039.mm.1	4.70637	T	Adhfe1	alcohol dehydrogenase, iron containing, 1	Multiple_Complex	PSR0100000292.mm.1	-6.31214	2.47839e-05	0.0365352
TC1000002846.mm.1	-8.98522	T	Snap91	neuron navigator 3	Multiple_Complex	PSR1000021618.mm.1	9.28764	3.36726e-05	0.0431617	Alternative 5' Donor Site	0.312223
TC0600000775.mm.1	2.96055	T	Gng12	guanine nucleotide binding protein (G protein), gamma 12	Multiple_Complex	N/A	N/A	N/A	N/A	N/A	N/A
TC0200005150.mm.1	2.33473	T	Snf8	solute carrier family 13 (sodium-dependent dicarboxylate transporter), member 3	Multiple_Complex	PSR0200044015.mm.1	4.94003	3.60931e-06	0.0129195	Cassette Exon	0.295544
TC0200001524.mm.1	5.00451	T	Slc1a2	solute carrier family 1 (glial high affinity glutamate transporter), member 2	Multiple_Complex	N/A	N/A	N/A	N/A	N/A	N/A
TC0700004119.mm.1	4.11966	T	Dkk3	dickkopf homolog 3 (Xenopus laevis)	Coding	JUC0700017939.mm.1	-6.44074	2.576e-05	0.0370533
TC0800000796.mm.1	2.51649	T	Slc27a1	solute carrier family 27 (fatty acid transporter), member 1	Coding	N/A	N/A	N/A	N/A	N/A	N/A
TC1400001524.mm.1	-3.90583	T	Sowaha	guanine nucleotide binding protein (G protein), gamma 2	Multiple_Complex	PSR1400011355.mm.1	7.71792	9.86778e-07	0.0070107	Alternative 3' Acceptor Site	0.21272
TC1200001886.mm.1	4.77345	T	Trim9	tripartite motif-containing 9	Multiple_Complex	N/A	N/A	N/A	N/A	N/A	N/A
TC0300000238.mm.1	-2.93763	T	Sox2ot	SOX2 overlapping transcript (non-protein coding); microRNA 1897	Multiple_Complex	PSR0300001522.mm.1	-11.8887	1.88682e-06	0.00970256	Cassette Exon	0.224586
TC0900002113.mm.1	2.05311	T	Sp9	sortilin-related receptor, LDLR class A repeats-containing; Synthetic construct Mus musculus clone IMAGE:100069522, MGC:199424 sortilin-related receptor, LDLR class A repeats-containing (Sorl1) mRNA, encodes complete protein.	Multiple_Complex	PSR0900017475.mm.1	5.79909	1.00942e-05	0.0214572	Cassette Exon	0.208579
TC1300001638.mm.1	1.61398	T	Hist1h2ac	histone cluster 1, H2ac	Multiple_Complex	N/A	N/A	N/A	N/A	N/A	N/A
TC0200000955.mm.1	-2.94265	T	Csrnp3	cysteine-serine-rich nuclear protein 3	Multiple_Complex	PSR0200007601.mm.1	-6.81539	1.8157e-05	0.0307304
TC0700000921.mm.1	5.9753	T	Luzp2	leucine zipper protein 2	Multiple_Complex	N/A	N/A	N/A	N/A	N/A	N/A
TC0800001871.mm.1	-1.05142	T	Vdac3	voltage-dependent anion channel 3	Coding	JUC0800008049.mm.1	-6.85465	5.60997e-07	0.00520353
TC0500000361.mm.1	5.36932	T	Fgfr3	fibroblast growth factor receptor 3	Multiple_Complex	N/A	N/A	N/A	N/A	N/A	N/A
TC0500002887.mm.1	2.9158	T	Sparcl1	SPARC-like 1	Coding	PSR0500025505.mm.1	-3.85387	1.2611e-05	0.0241678	Alternative 3' Acceptor Site	0.245613
TC0200001377.mm.1	4.42497	T	St6gal1	low density lipoprotein receptor-related protein 4	Multiple_Complex	PSR0200010721.mm.1	5.89855	1.49024e-07	0.00237991	Cassette Exon	0.240932
TC0200001023.mm.1	-6.78725	T	Stmn2	glutamate decarboxylase 1	Multiple_Complex	PSR0200008190.mm.1	-15.3687	3.75138e-05	0.0460329	Cassette Exon	0.231053
TC1200001886.mm.1	4.77345	T	Trim9	tripartite motif-containing 9	Multiple_Complex	JUC1200007196.mm.1	-6.9789	1.34153e-05	0.0253366
TC1500001806.mm.1	-1.01929	T	Gm3787	PREDICTED: predicted gene 3787 (Gm3787), mRNA.	Multiple_Complex	N/A	N/A	N/A	N/A	N/A	N/A
TC1800000179.mm.1	6.19897	T	Dtna	dystrobrevin alpha; dystrobrevin alpha (Dtna), transcript variant 1, mRNA.	Multiple_Complex	JUC1800000764.mm.1	-7.03687	1.87555e-05	0.0310346
TC0900002898.mm.1	-1.98658	T	Clstn2	calsyntenin 2	Multiple_Complex	N/A	N/A	N/A	N/A	N/A	N/A
TC0300000974.mm.1	5.97098	T	Notch2	notch 2; Synthetic construct Mus musculus clone IMAGE:100069450, MGC:199352 Notch gene homolog 2 (Drosophila) (Notch2) mRNA, encodes complete protein.	Multiple_Complex	PSR0300007869.mm.1	-7.05298	8.90674e-10	0.000138685
TC1100002180.mm.1	-2.22127	T	Nacad	NAC alpha domain containing	Multiple_Complex	N/A	N/A	N/A	N/A	N/A	N/A
TC1800001139.mm.1	-2.15051	T	Slc27a1	neuronal regeneration related protein	Multiple_Complex	PSR1800008295.mm.1	-7.09267	1.47915e-06	0.00846926
TC0900000725.mm.1	-1.30871	T	Stra6	stimulated by retinoic acid gene 6	Multiple_Complex	PSR0900005365.mm.1	-6.86575	1.57042e-05	0.0281875	Cassette Exon	0.245896
TC1100002515.mm.1	-1.70846	T	Tenm2	teneurin transmembrane protein 2	Multiple_Complex	N/A	N/A	N/A	N/A	N/A	N/A
TC0100000430.mm.1	-1.67571	T	Aox4	aldehyde oxidase 4	Multiple_Complex	JUC0100001989.mm.1	-7.29683	3.29125e-06	0.0122748
TC1100003962.mm.1	-1.52272	T	Cacng4	calcium channel, voltage-dependent, gamma subunit 4	Multiple_Complex	N/A	N/A	N/A	N/A	N/A	N/A
TC0300001482.mm.1	6.99756	T	Ddah1	dimethylarginine dimethylaminohydrolase 1	Multiple_Complex	PSR0300011954.mm.1	-7.3565	4.90194e-07	0.00484616
TC0300002543.mm.1	-1.80201	T	Pde4dip; Mir7225	phosphodiesterase 4D interacting protein (myomegalin); microRNA 7225	Multiple_Complex	N/A	N/A	N/A	N/A	N/A	N/A
TC0800001871.mm.1	-1.05142	T	Vdac3	voltage-dependent anion channel 3	Coding	JUC0800008050.mm.1	-7.65378	7.86947e-08	0.00163218
TC0500001730.mm.1	-1.5755	T	Grid2ip	glutamate receptor, ionotropic, delta 2 (Grid2) interacting protein 1	Multiple_Complex	N/A	N/A	N/A	N/A	N/A	N/A
TC0900000296.mm.1	-2.33169	T	Ets1	E26 avian leukemia oncogene 1, 5 domain; E26 avian leukemia oncogene 1, 5' domain	Multiple_Complex	JUC0900001241.mm.1	-7.74955	8.50728e-06	0.0197629
TC1000001090.mm.1	-2.05802	T	Map3k13	ankyrin repeat and sterile alpha motif domain containing 1B	Multiple_Complex	PSR1000008393.mm.1	-7.75161	1.51416e-06	0.00857332
TC0300002357.mm.1	-1.00781	T	Il6ra	interleukin 6 receptor, alpha	Coding	JUC0300009511.mm.1	-7.82756	2.9357e-06	0.0118206
TC0700003552.mm.1	6.20533	T	Mfge8	milk fat globule-EGF factor 8 protein	Coding	N/A	N/A	N/A	N/A	N/A	N/A
TC0200005041.mm.1	-3.32514	T	Gm14204	predicted gene 14204	NonCoding	PSR0200043145.mm.1	-7.94707	1.2216e-05	0.0237416
TC0700001689.mm.1	4.47934	T	Xylt1	xylosyltransferase 1; Synthetic construct Mus musculus clone IMAGE:100063303, MGC:191060 xylosyltransferase 1 (Xylt1) mRNA, encodes complete protein.	Multiple_Complex	N/A	N/A	N/A	N/A	N/A	N/A
TC1000001090.mm.1	-2.05802	T	Abca1	ankyrin repeat and sterile alpha motif domain containing 1B	Multiple_Complex	PSR1000008343.mm.1	-8.66094	7.02265e-06	0.0177675
TC0100000039.mm.1	4.70637	T	Adhfe1	alcohol dehydrogenase, iron containing, 1	Multiple_Complex	N/A	N/A	N/A	N/A	N/A	N/A
TC1800001312.mm.1	4.34165	T	Sema6a	sema domain, transmembrane domain (TM), and cytoplasmic domain, (semaphorin) 6A	Multiple_Complex	PSR1800009747.mm.1	-8.76804	1.10195e-05	0.022386
TC0600001266.mm.1	15.1101	T	Slc6a11	solute carrier family 6 (neurotransmitter transporter, GABA), member 11	Coding	JUC0600005153.mm.1	-8.81663	2.6561e-05	0.0375713
TC0100003079.mm.1	-1.69544	T	Cntn2	contactin 2	Multiple_Complex	N/A	N/A	N/A	N/A	N/A	N/A
TC0200005150.mm.1	2.33473	T	Tcf7l2	solute carrier family 13 (sodium-dependent dicarboxylate transporter), member 3	Multiple_Complex	PSR0200044016.mm.1	4.79338	7.03679e-07	0.00592261	Cassette Exon	0.256522
TC0200003529.mm.1	-3.55235	T	Slc13a3	nebulin	Multiple_Complex	JUC0200015250.mm.1	-8.97322	2.50742e-06	0.0107359
TC1100002515.mm.1	-1.70846	T	Tenm2	teneurin transmembrane protein 2	Multiple_Complex	PSR1100023451.mm.1	-5.32012	1.04975e-05	0.0219402	Cassette Exon	0.29443
TC0400001034.mm.1	2.02488	T	Thbs4	adenylate kinase 4	Multiple_Complex	PSR0400006994.mm.1	3.88773	4.12226e-05	0.0482377	Alternative 5' Donor Site	0.281389
TC1800000179.mm.1	6.19897	T	Dtna	dystrobrevin alpha; dystrobrevin alpha (Dtna), transcript variant 1, mRNA.	Multiple_Complex	N/A	N/A	N/A	N/A	N/A	N/A
TC0200001023.mm.1	-6.78725	T	Dio2	glutamate decarboxylase 1	Multiple_Complex	JUC0200004199.mm.1	-9.8372	1.96229e-05	0.0317407
TC0100003565.mm.1	1.22018	T	Tiam2	ATPase, Na+/K+ transporting, alpha 4 polypeptide	Coding	PSR0100029276.mm.1	10.8116	6.27581e-06	0.0167947	Cassette Exon	0.255501
TC0300000043.mm.1	-18.3884	T	Ttc39c	stathmin-like 2	Coding	JUC0300000067.mm.1	-9.87314	2.13328e-05	0.0336372
TC0900003040.mm.1	9.75538	T	Dync2h1	solute carrier family 38, member 3	Multiple_Complex	PSR0900025421.mm.1	-10.0003	8.76858e-06	0.0199119
TC0300001482.mm.1	6.99756	T	Ddah1	dimethylarginine dimethylaminohydrolase 1	Multiple_Complex	N/A	N/A	N/A	N/A	N/A	N/A
TC0900003040.mm.1	9.75538	T	Xlr5b	solute carrier family 38, member 3	Multiple_Complex	PSR0900025417.mm.1	-10.0738	2.56323e-07	0.00319292
TC0900003040.mm.1	9.75538	T	Xlr5d-ps	solute carrier family 38, member 3	Multiple_Complex	PSR0900025416.mm.1	-10.0891	5.06801e-06	0.0154138
TC1500001657.mm.1	-1.26018	T	Ndrg1	N-myc downstream regulated gene 1	Multiple_Complex	N/A	N/A	N/A	N/A	N/A	N/A
TC0200004713.mm.1	10.6384	T	Jag1	jagged 1	Multiple_Complex	JUC0200020931.mm.1	-10.2546	1.22361e-05	0.0237416
TC1700001822.mm.1	3.11793	T	Cbs	cystathionine beta-synthase	Multiple_Complex	N/A	N/A	N/A	N/A	N/A	N/A
TC1100004224.mm.1	2.65369	T	Tmem132b	notum pectinacetylesterase homolog (Drosophila)	Multiple_Complex	PSR1100040416.mm.1	6.76133	5.27711e-06	0.0154138	Cassette Exon	0.252611
TC0500002394.mm.1	4.65319	T	Ppargc1a	peroxisome proliferative activated receptor, gamma, coactivator 1 alpha	Multiple_Complex	N/A	N/A	N/A	N/A	N/A	N/A
TC1300000148.mm.1	-1.57379	T	Elmo1	engulfment and cell motility 1; engulfment and cell motility 1 (Elmo1), transcript variant 2, non-coding RNA.	Multiple_Complex	JUC1300000601.mm.1	-10.656	7.65151e-06	0.018628
TC0700000050.mm.1	1.12498	T	Ssc5d	scavenger receptor cysteine rich family, 5 domains; scavenger receptor cysteine rich domain containing (5 domains)	Coding	N/A	N/A	N/A	N/A	N/A	N/A
TC0100000023.mm.1	-24.9737	T	Tnfrsf19	suppression of tumorigenicity 18	Multiple_Complex	PSR0100000199.mm.1	7.0253	1.73565e-05	0.0297801	Cassette Exon	0.228371
TC0700004119.mm.1	4.11966	T	Dkk3	dickkopf homolog 3 (Xenopus laevis)	Coding	N/A	N/A	N/A	N/A	N/A	N/A
TC0100002758.mm.1	4.01082	T	Tsc22d4	endothelin converting enzyme-like 1	Multiple_Complex	PSR0100022267.mm.1	10.2486	2.98464e-06	0.0119146	Cassette Exon	0.204428
TC1500001279.mm.1	-1.65025	T	Basp1	brain abundant, membrane attached signal protein 1; Synthetic construct Mus musculus clone IMAGE:100064072, MGC:193443 brain abundant, membrane attached signal protein 1 (Basp1) mRNA, encodes complete protein.	Multiple_Complex	N/A	N/A	N/A	N/A	N/A	N/A
TC0900001455.mm.1	5.2454	T	Ttc39c	chondroitin sulfate proteoglycan 5	Multiple_Complex	PSR0900012110.mm.1	7.71158	1.97191e-06	0.00970256	Cassette Exon	0.300442
TC0200000955.mm.1	-2.94265	T	Csrnp3	cysteine-serine-rich nuclear protein 3	Multiple_Complex	N/A	N/A	N/A	N/A	N/A	N/A
TC0900003040.mm.1	9.75538	T	Xlr5a	solute carrier family 38, member 3	Multiple_Complex	PSR0900025420.mm.1	-12.1809	6.35174e-06	0.0167947
TC0800001871.mm.1	-1.05142	T	Vdac3	voltage-dependent anion channel 3	Coding	N/A	N/A	N/A	N/A	N/A	N/A
TC0200003176.mm.1	1.22339	T	Ttyh1	nucleus accumbens associated 2, BEN and BTB (POZ) domain containing	Multiple_Complex	PSR0200026404.mm.1	4.91355	1.48433e-05	0.027151	Alternative 5' Donor Site	0.218162
TC1200002506.mm.1	-1.13908	T	Dnah11	dynein, axonemal, heavy chain 11	Multiple_Complex	JUC1200010492.mm.1	-13.3125	2.01432e-05	0.0323582
TC0900000725.mm.1	-1.30871	T	Stra6	stimulated by retinoic acid gene 6	Multiple_Complex	N/A	N/A	N/A	N/A	N/A	N/A
TC1500002162.mm.1	1.1456	T	Col2a1	collagen, type II, alpha 1	Multiple_Complex	PSR1500017509.mm.1	-13.4896	2.41448e-06	0.0105162
TC0600001266.mm.1	15.1101	T	Slc6a11	solute carrier family 6 (neurotransmitter transporter, GABA), member 11	Coding	N/A	N/A	N/A	N/A	N/A	N/A
TC1100002126.mm.1	-1.21425	T	Ewsr1	Ewing sarcoma breakpoint region 1; Ewing sarcoma breakpoint region 1 (Ewsr1), mRNA.	Multiple_Complex	JUC1100010822.mm.1	-14.2684	2.14156e-05	0.0336372
[truncated: 58 more rows]

## Sheet: iNBvsTAP G.Profiler
source	term_name	term_id	adjusted_p_value	negative_log10_of_adjusted_p_value	term_size	query_size	intersection_size	effective_domain_size	intersections
[truncated: 50 more rows]

[truncated: 2 more sheets: iNBvsmNB DSG, iNBvslNB G.Profiler]
